# Supplementary material for: Exploring the plasmodesmata callose-binding protein gene family in upland cotton: unraveling insights for enhancing fiber length
Source: PeerJ. 2024 Jun 26;12:e17625. doi: 10.7717/peerj.17625 (PMC11214431; doi:10.7717/peerj.17625)
Supplement: Supplemental Information 1 [file peerj-12-17625-s001.xls]

## Sheet: Sheet1
Primer	Sequence（5′-3′)
Gh_A12G1651-F	CGACGGGCAAATGGTGTGTT
Gh_A12G1651-R	GGAGGGGTAAGAACAGCCAC
Gh_A03G0620-F	GTTACTACCGCTGACCCCAG
Gh_A03G0620-R	TGGGGTGTTGTTGATTGGGT
Gh_D05G2949-F	CCCTCCACTTGCACCTATCC
Gh_D05G2949-R	TTGGCTCGTTGATGCCTGTT
Gh_D13G0849-F	GCACCAACTGGGACAACAAC
Gh_D13G0849-R	TTGTGAAGAGACCCACAGCA
Gh_A13G0725-F	TAGCACAGGCATGACCACAC
Gh_A13G0725-R	ATTGAAGCCGGTTGCTGTTG
Gh_A02G0230-F	CATTGCGCAGATGCAAGAACA
Gh_A02G0230-R	GGAGGGGGAAAGTATGGAGG
Gh_D12G1801-F	TCTGCTGGCTGTTCTTACCC
Gh_D12G1801-R	AGTGTTGGTGGAGGTGGTTC
Gh_D03G0905-F	GCGCCGACTGTAACCCTATC
Gh_D03G0905-R	GCCTTGAGCTTGGCCTTTTC
Gh_A05G2647-F	CTATCCATCAAGCACAGGCAC
Gh_A05G2647-R	GTTGTTGTTCCTGTTGGGCT
Gh_D02G1230-F	GCCCTCCACAAGCAATACCA
Gh_D02G1230-R	GGAGCCCTATTGGGATGTGG
Gh_A10G1095-F	CCACTCCTAGCTTCCCTCCT
Gh_A10G1095-R	AAAACACTGGTGGGCTTGGA
Gh_D10G1416-F	TGTCCACACCTAGCTTCCCT
Gh_D10G1416-R	GCACCATAAGGCTGTGCTTG
