# Supplementary material for: Exploring the plasmodesmata callose-binding protein gene family in upland cotton: unraveling insights for enhancing fiber length
Source: PeerJ. 2024 Jun 26;12:e17625. doi: 10.7717/peerj.17625 (PMC11214431; doi:10.7717/peerj.17625)
Supplement: Supplemental Information 2 [file peerj-12-17625-s002.xls]

## Sheet: Sample Setup
Block Type	96fast
Chemistry	SYBR_GREEN
Experiment File Name	S:\LQW\ZHB\2014.eds
Experiment Run End Time	2012-05-24 02:00:11 AM CST
Instrument Type	sds7500fast
Passive Reference	ROX
Well	Sample Name	Sample Color	Biogroup Name	Biogroup Color	Target Name	Target Color	Task	Reporter	Quencher	Quantity	Comments
A1	JING	RGB(132,193,241)			1651	RGB(139,189,249)	UNKNOWN	SYBR	None
A2	JING	RGB(132,193,241)			1651	RGB(139,189,249)	UNKNOWN	SYBR	None
A3	JING	RGB(132,193,241)			1651	RGB(139,189,249)	UNKNOWN	SYBR	None
A4	YE	RGB(168,255,222)			1651	RGB(139,189,249)	UNKNOWN	SYBR	None
A5	YE	RGB(168,255,222)			1651	RGB(139,189,249)	UNKNOWN	SYBR	None
A6	YE	RGB(168,255,222)			1651	RGB(139,189,249)	UNKNOWN	SYBR	None
A7	HUA	RGB(223,221,142)			1651	RGB(139,189,249)	UNKNOWN	SYBR	None
A8	HUA	RGB(223,221,142)			1651	RGB(139,189,249)	UNKNOWN	SYBR	None
A9	HUA	RGB(223,221,142)			1651	RGB(139,189,249)	UNKNOWN	SYBR	None
A10	5	RGB(247,255,168)			1651	RGB(139,189,249)	UNKNOWN	SYBR	None
A11	5	RGB(247,255,168)			1651	RGB(139,189,249)	UNKNOWN	SYBR	None
A12	5	RGB(247,255,168)			1651	RGB(139,189,249)	UNKNOWN	SYBR	None
B1	10	RGB(180,255,0)			1651	RGB(139,189,249)	UNKNOWN	SYBR	None
B2	10	RGB(180,255,0)			1651	RGB(139,189,249)	UNKNOWN	SYBR	None
B3	10	RGB(180,255,0)			1651	RGB(139,189,249)	UNKNOWN	SYBR	None
B4	15	RGB(255,204,153)			1651	RGB(139,189,249)	UNKNOWN	SYBR	None
B5	15	RGB(255,204,153)			1651	RGB(139,189,249)	UNKNOWN	SYBR	None
B6	15	RGB(255,204,153)			1651	RGB(139,189,249)	UNKNOWN	SYBR	None
B7	20	RGB(253,138,88)			1651	RGB(139,189,249)	UNKNOWN	SYBR	None
B8	20	RGB(253,138,88)			1651	RGB(139,189,249)	UNKNOWN	SYBR	None
B9	20	RGB(253,138,88)			1651	RGB(139,189,249)	UNKNOWN	SYBR	None
B10	WATER	RGB(213,244,165)			1651	RGB(139,189,249)	NTC	SYBR	None
B11	WATER	RGB(213,244,165)			1651	RGB(139,189,249)	NTC	SYBR	None
B12	WATER	RGB(213,244,165)			1651	RGB(139,189,249)	NTC	SYBR	None
C1	JING	RGB(132,193,241)			0620	RGB(249,128,228)	UNKNOWN	SYBR	None
C2	JING	RGB(132,193,241)			0620	RGB(249,128,228)	UNKNOWN	SYBR	None
C3	JING	RGB(132,193,241)			0620	RGB(249,128,228)	UNKNOWN	SYBR	None
C4	YE	RGB(168,255,222)			0620	RGB(249,128,228)	UNKNOWN	SYBR	None
C5	YE	RGB(168,255,222)			0620	RGB(249,128,228)	UNKNOWN	SYBR	None
C6	YE	RGB(168,255,222)			0620	RGB(249,128,228)	UNKNOWN	SYBR	None
C7	HUA	RGB(223,221,142)			0620	RGB(249,128,228)	UNKNOWN	SYBR	None
C8	HUA	RGB(223,221,142)			0620	RGB(249,128,228)	UNKNOWN	SYBR	None
C9	HUA	RGB(223,221,142)			0620	RGB(249,128,228)	UNKNOWN	SYBR	None
C10	5	RGB(247,255,168)			0620	RGB(249,128,228)	UNKNOWN	SYBR	None
C11	5	RGB(247,255,168)			0620	RGB(249,128,228)	UNKNOWN	SYBR	None
C12	5	RGB(247,255,168)			0620	RGB(249,128,228)	UNKNOWN	SYBR	None
D1	10	RGB(180,255,0)			0620	RGB(249,128,228)	UNKNOWN	SYBR	None
D2	10	RGB(180,255,0)			0620	RGB(249,128,228)	UNKNOWN	SYBR	None
D3	10	RGB(180,255,0)			0620	RGB(249,128,228)	UNKNOWN	SYBR	None
D4	15	RGB(255,204,153)			0620	RGB(249,128,228)	UNKNOWN	SYBR	None
D5	15	RGB(255,204,153)			0620	RGB(249,128,228)	UNKNOWN	SYBR	None
D6	15	RGB(255,204,153)			0620	RGB(249,128,228)	UNKNOWN	SYBR	None
D7	20	RGB(253,138,88)			0620	RGB(249,128,228)	UNKNOWN	SYBR	None
D8	20	RGB(253,138,88)			0620	RGB(249,128,228)	UNKNOWN	SYBR	None
D9	20	RGB(253,138,88)			0620	RGB(249,128,228)	UNKNOWN	SYBR	None
D10	WATER	RGB(213,244,165)			0620	RGB(249,128,228)	NTC	SYBR	None
D11	WATER	RGB(213,244,165)			0620	RGB(249,128,228)	NTC	SYBR	None
D12	WATER	RGB(213,244,165)			0620	RGB(249,128,228)	NTC	SYBR	None
E1	JING	RGB(132,193,241)			2949	RGB(253,156,166)	UNKNOWN	SYBR	None
E2	JING	RGB(132,193,241)			2949	RGB(253,156,166)	UNKNOWN	SYBR	None
E3	JING	RGB(132,193,241)			2949	RGB(253,156,166)	UNKNOWN	SYBR	None
E4	YE	RGB(168,255,222)			2949	RGB(253,156,166)	UNKNOWN	SYBR	None
E5	YE	RGB(168,255,222)			2949	RGB(253,156,166)	UNKNOWN	SYBR	None
E6	YE	RGB(168,255,222)			2949	RGB(253,156,166)	UNKNOWN	SYBR	None
E7	HUA	RGB(223,221,142)			2949	RGB(253,156,166)	UNKNOWN	SYBR	None
E8	HUA	RGB(223,221,142)			2949	RGB(253,156,166)	UNKNOWN	SYBR	None
E9	HUA	RGB(223,221,142)			2949	RGB(253,156,166)	UNKNOWN	SYBR	None
E10	5	RGB(247,255,168)			2949	RGB(253,156,166)	UNKNOWN	SYBR	None
E11	5	RGB(247,255,168)			2949	RGB(253,156,166)	UNKNOWN	SYBR	None
E12	5	RGB(247,255,168)			2949	RGB(253,156,166)	UNKNOWN	SYBR	None
F1	10	RGB(180,255,0)			2949	RGB(253,156,166)	UNKNOWN	SYBR	None
F2	10	RGB(180,255,0)			2949	RGB(253,156,166)	UNKNOWN	SYBR	None
F3	10	RGB(180,255,0)			2949	RGB(253,156,166)	UNKNOWN	SYBR	None
F4	15	RGB(255,204,153)			2949	RGB(253,156,166)	UNKNOWN	SYBR	None
F5	15	RGB(255,204,153)			2949	RGB(253,156,166)	UNKNOWN	SYBR	None
F6	15	RGB(255,204,153)			2949	RGB(253,156,166)	UNKNOWN	SYBR	None
F7	20	RGB(253,138,88)			2949	RGB(253,156,166)	UNKNOWN	SYBR	None
F8	20	RGB(253,138,88)			2949	RGB(253,156,166)	UNKNOWN	SYBR	None
F9	20	RGB(253,138,88)			2949	RGB(253,156,166)	UNKNOWN	SYBR	None
F10	WATER	RGB(213,244,165)			2949	RGB(253,156,166)	NTC	SYBR	None
F11	WATER	RGB(213,244,165)			2949	RGB(253,156,166)	NTC	SYBR	None
F12	WATER	RGB(213,244,165)			2949	RGB(253,156,166)	NTC	SYBR	None
G1	JING	RGB(132,193,241)			ACTIN	RGB(139,189,249)	UNKNOWN	SYBR	None
G2	JING	RGB(132,193,241)			ACTIN	RGB(139,189,249)	UNKNOWN	SYBR	None
G3	JING	RGB(132,193,241)			ACTIN	RGB(139,189,249)	UNKNOWN	SYBR	None
G4	YE	RGB(168,255,222)			ACTIN	RGB(139,189,249)	UNKNOWN	SYBR	None
G5	YE	RGB(168,255,222)			ACTIN	RGB(139,189,249)	UNKNOWN	SYBR	None
G6	YE	RGB(168,255,222)			ACTIN	RGB(139,189,249)	UNKNOWN	SYBR	None
G7	HUA	RGB(223,221,142)			ACTIN	RGB(139,189,249)	UNKNOWN	SYBR	None
G8	HUA	RGB(223,221,142)			ACTIN	RGB(139,189,249)	UNKNOWN	SYBR	None
G9	HUA	RGB(223,221,142)			ACTIN	RGB(139,189,249)	UNKNOWN	SYBR	None
G10	5	RGB(247,255,168)			ACTIN	RGB(139,189,249)	UNKNOWN	SYBR	None
G11	5	RGB(247,255,168)			ACTIN	RGB(139,189,249)	UNKNOWN	SYBR	None
G12	5	RGB(247,255,168)			ACTIN	RGB(139,189,249)	UNKNOWN	SYBR	None
H1	10	RGB(180,255,0)			ACTIN	RGB(139,189,249)	UNKNOWN	SYBR	None
H2	10	RGB(180,255,0)			ACTIN	RGB(139,189,249)	UNKNOWN	SYBR	None
H3	10	RGB(180,255,0)			ACTIN	RGB(139,189,249)	UNKNOWN	SYBR	None
H4	15	RGB(255,204,153)			ACTIN	RGB(139,189,249)	UNKNOWN	SYBR	None
H5	15	RGB(255,204,153)			ACTIN	RGB(139,189,249)	UNKNOWN	SYBR	None
H6	15	RGB(255,204,153)			ACTIN	RGB(139,189,249)	UNKNOWN	SYBR	None
H7	20	RGB(253,138,88)			ACTIN	RGB(139,189,249)	UNKNOWN	SYBR	None
H8	20	RGB(253,138,88)			ACTIN	RGB(139,189,249)	UNKNOWN	SYBR	None
H9	20	RGB(253,138,88)			ACTIN	RGB(139,189,249)	UNKNOWN	SYBR	None
H10	WATER	RGB(213,244,165)			ACTIN	RGB(139,189,249)	NTC	SYBR	None
H11	WATER	RGB(213,244,165)			ACTIN	RGB(139,189,249)	NTC	SYBR	None
H12	WATER	RGB(213,244,165)			ACTIN	RGB(139,189,249)	NTC	SYBR	None

## Sheet: Results
Block Type	96fast
Chemistry	SYBR_GREEN
Experiment File Name	S:\LQW\ZHB\2014.eds
Experiment Run End Time	2012-05-24 02:00:11 AM CST
Instrument Type	sds7500fast
Passive Reference	ROX
Well	Sample Name	Target Name	Task	Reporter	Quencher	Cт	Cт Mean	Cт SD	Quantity	Quantity Mean	Quantity SD	Automatic Ct Threshold	Ct Threshold	Automatic Baseline	Baseline Start	Baseline End	Tm1	Tm2	Tm3	Comments	AMPNC	HIGHSD	OUTLIERRG	MTP
A1	JING	1651	UNKNOWN	SYBR	None	22.6593	22.7362	0.0942164				TRUE	0.475108	TRUE	3	17	82.3303				N	N	N	N
A2	JING	1651	UNKNOWN	SYBR	None	22.7079	22.7362	0.0942164				TRUE	0.475108	TRUE	3	16	82.3303				N	N	N	N
A3	JING	1651	UNKNOWN	SYBR	None	22.8413	22.7362	0.0942164				TRUE	0.475108	TRUE	3	16	82.5076				N	N	N	N
A4	YE	1651	UNKNOWN	SYBR	None	25.9271	25.5644	0.353228				TRUE	0.475108	TRUE	3	20	82.6849				N	N	N	N
A5	YE	1651	UNKNOWN	SYBR	None	25.2215	25.5644	0.353228				TRUE	0.475108	TRUE	3	19	82.8622				N	N	N	N
A6	YE	1651	UNKNOWN	SYBR	None	25.5445	25.5644	0.353228				TRUE	0.475108	TRUE	3	20	83.0395				N	N	N	N
A7	HUA	1651	UNKNOWN	SYBR	None	26.9801	27.1633	0.159672				TRUE	0.475108	TRUE	3	20	82.8622				N	N	N	N
A8	HUA	1651	UNKNOWN	SYBR	None	27.2729	27.1633	0.159672				TRUE	0.475108	TRUE	3	20	82.8622				N	N	N	N
A9	HUA	1651	UNKNOWN	SYBR	None	27.2369	27.1633	0.159672				TRUE	0.475108	TRUE	3	21	82.6849				N	N	N	N
A10	5	1651	UNKNOWN	SYBR	None	23.9742	24.2548	0.297644				TRUE	0.475108	TRUE	3	18	82.6849				N	N	N	N
A11	5	1651	UNKNOWN	SYBR	None	24.2233	24.2548	0.297644				TRUE	0.475108	TRUE	3	18	82.5076				N	N	N	N
A12	5	1651	UNKNOWN	SYBR	None	24.567	24.2548	0.297644				TRUE	0.475108	TRUE	3	18	82.3303				N	N	N	N
B1	10	1651	UNKNOWN	SYBR	None	26.5384	26.6064	0.169296				TRUE	0.475108	TRUE	3	20	82.3303				N	N	N	N
B2	10	1651	UNKNOWN	SYBR	None	26.7991	26.6064	0.169296				TRUE	0.475108	TRUE	3	20	82.5076				N	N	N	N
B3	10	1651	UNKNOWN	SYBR	None	26.4817	26.6064	0.169296				TRUE	0.475108	TRUE	3	20	82.8622				N	N	N	N
B4	15	1651	UNKNOWN	SYBR	None	28.6813	28.6554	0.023793				TRUE	0.475108	TRUE	3	23	82.8622				N	N	N	N
B5	15	1651	UNKNOWN	SYBR	None	28.6504	28.6554	0.023793				TRUE	0.475108	TRUE	3	22	83.0395				N	N	N	N
B6	15	1651	UNKNOWN	SYBR	None	28.6345	28.6554	0.023793				TRUE	0.475108	TRUE	3	22	83.2168				N	N	N	N
B7	20	1651	UNKNOWN	SYBR	None	29.1853	29.6141	0.371748				TRUE	0.475108	TRUE	3	23	83.2168				N	N	N	N
B8	20	1651	UNKNOWN	SYBR	None	29.8445	29.6141	0.371748				TRUE	0.475108	TRUE	3	23	83.2168				N	N	N	N
B9	20	1651	UNKNOWN	SYBR	None	29.8127	29.6141	0.371748				TRUE	0.475108	TRUE	3	23	83.2168				N	N	N	N
B10	WATER	1651	NTC	SYBR	None	30.039	29.4451	0.541694				TRUE	0.475108	TRUE	3	24	83.0395				Y	Y	N	N
B11	WATER	1651	NTC	SYBR	None	29.3181	29.4451	0.541694				TRUE	0.475108	TRUE	3	23	82.6849				Y	Y	N	N
B12	WATER	1651	NTC	SYBR	None	28.9782	29.4451	0.541694				TRUE	0.475108	TRUE	3	22	82.5076				Y	Y	N	N
C1	JING	0620	UNKNOWN	SYBR	None	23.9286	23.5508	0.446494				TRUE	0.385689	TRUE	3	18	83.7486				N	N	N	N
C2	JING	0620	UNKNOWN	SYBR	None	23.6656	23.5508	0.446494				TRUE	0.385689	TRUE	3	17	84.1032				N	N	N	N
C3	JING	0620	UNKNOWN	SYBR	None	23.0581	23.5508	0.446494				TRUE	0.385689	TRUE	3	17	84.1032				N	N	N	N
C4	YE	0620	UNKNOWN	SYBR	None	26.9375	26.1452	0.739917				TRUE	0.385689	TRUE	3	21	84.1032				N	Y	N	N
C5	YE	0620	UNKNOWN	SYBR	None	26.0262	26.1452	0.739917				TRUE	0.385689	TRUE	3	20	84.2805				N	Y	N	N
C6	YE	0620	UNKNOWN	SYBR	None	25.4721	26.1452	0.739917				TRUE	0.385689	TRUE	3	19	84.2805				N	Y	N	N
C7	HUA	0620	UNKNOWN	SYBR	None	24.0429	24.0017	0.766201				TRUE	0.385689	TRUE	3	18	84.4578	78.2524			N	Y	N	Y
C8	HUA	0620	UNKNOWN	SYBR	None	23.2158	24.0017	0.766201				TRUE	0.385689	TRUE	3	17	84.2805	78.0751			N	Y	N	Y
C9	HUA	0620	UNKNOWN	SYBR	None	24.7465	24.0017	0.766201				TRUE	0.385689	TRUE	3	19	84.2805	77.7205			N	Y	N	Y
C10	5	0620	UNKNOWN	SYBR	None	25.5976	25.8133	0.190672				TRUE	0.385689	TRUE	3	20	84.1032				N	N	N	N
C11	5	0620	UNKNOWN	SYBR	None	25.883	25.8133	0.190672				TRUE	0.385689	TRUE	3	20	83.9259				N	N	N	N
C12	5	0620	UNKNOWN	SYBR	None	25.9594	25.8133	0.190672				TRUE	0.385689	TRUE	3	19	83.7486				N	N	N	N
D1	10	0620	UNKNOWN	SYBR	None	26.6098	26.2731	0.592177				TRUE	0.385689	TRUE	3	21	83.7486				N	Y	N	N
D2	10	0620	UNKNOWN	SYBR	None	25.5894	26.2731	0.592177				TRUE	0.385689	TRUE	3	19	83.7486				N	Y	Y	N
D3	10	0620	UNKNOWN	SYBR	None	26.6202	26.2731	0.592177				TRUE	0.385689	TRUE	3	21	84.1032				N	Y	N	N
D4	15	0620	UNKNOWN	SYBR	None	24.5951	24.9308	0.514713				TRUE	0.385689	TRUE	3	19	84.2805	78.0751			N	Y	N	Y
D5	15	0620	UNKNOWN	SYBR	None	24.6739	24.9308	0.514713				TRUE	0.385689	TRUE	3	19	84.4578	78.2524			N	Y	N	Y
D6	15	0620	UNKNOWN	SYBR	None	25.5234	24.9308	0.514713				TRUE	0.385689	TRUE	3	19	84.6351				N	Y	N	N
D7	20	0620	UNKNOWN	SYBR	None	24.8085	24.9407	0.121834				TRUE	0.385689	TRUE	3	19	84.6351				N	N	N	N
D8	20	0620	UNKNOWN	SYBR	None	25.0484	24.9407	0.121834				TRUE	0.385689	TRUE	3	19	84.6351				N	N	N	N
D9	20	0620	UNKNOWN	SYBR	None	24.9653	24.9407	0.121834				TRUE	0.385689	TRUE	3	19	84.4578				N	N	N	N
D10	WATER	0620	NTC	SYBR	None	27.4971	28.0666	1.11964				TRUE	0.385689	TRUE	3	20	77.1886	84.2805			Y	Y	N	Y
D11	WATER	0620	NTC	SYBR	None	27.3461	28.0666	1.11964				TRUE	0.385689	TRUE	3	19	77.7205	84.1032			Y	Y	N	Y
D12	WATER	0620	NTC	SYBR	None	29.3565	28.0666	1.11964				TRUE	0.385689	TRUE	3	23	83.9259				Y	Y	N	N
E1	JING	2949	UNKNOWN	SYBR	None	27.5442	27.6066	0.143428				TRUE	0.261144	TRUE	3	22	85.167	78.4297			N	N	N	Y
E2	JING	2949	UNKNOWN	SYBR	None	27.505	27.6066	0.143428				TRUE	0.261144	TRUE	3	22	85.3443	78.7843			N	N	N	Y
E3	JING	2949	UNKNOWN	SYBR	None	27.7707	27.6066	0.143428				TRUE	0.261144	TRUE	3	23	85.5216	78.7843			N	N	N	Y
E4	YE	2949	UNKNOWN	SYBR	None	25.5717	25.6377	0.0986658				TRUE	0.261144	TRUE	3	20	85.6989	79.3162			N	N	N	Y
E5	YE	2949	UNKNOWN	SYBR	None	25.5904	25.6377	0.0986658				TRUE	0.261144	TRUE	3	19	85.8762	79.3162			N	N	N	Y
E6	YE	2949	UNKNOWN	SYBR	None	25.7512	25.6377	0.0986658				TRUE	0.261144	TRUE	3	20	85.8762	79.3162			N	N	N	Y
E7	HUA	2949	UNKNOWN	SYBR	None	26.5196	26.6181	0.133474				TRUE	0.261144	TRUE	3	22	85.8762	79.3162			N	N	N	Y
E8	HUA	2949	UNKNOWN	SYBR	None	26.77	26.6181	0.133474				TRUE	0.261144	TRUE	3	21	85.8762	79.1389			N	N	N	Y
E9	HUA	2949	UNKNOWN	SYBR	None	26.5647	26.6181	0.133474				TRUE	0.261144	TRUE	3	21	85.6989	79.1389			N	N	N	Y
E10	5	2949	UNKNOWN	SYBR	None	29.6926	30.1271	0.38521				TRUE	0.261144	TRUE	3	24	85.5216	75.7703			N	N	N	Y
E11	5	2949	UNKNOWN	SYBR	None	30.2617	30.1271	0.38521				TRUE	0.261144	TRUE	3	25	85.3443				N	N	N	N
E12	5	2949	UNKNOWN	SYBR	None	30.4269	30.1271	0.38521				TRUE	0.261144	TRUE	3	25	84.9897				N	N	N	N
F1	10	2949	UNKNOWN	SYBR	None	30.4154	30.3382	0.233557				TRUE	0.261144	TRUE	3	25	84.8124				N	N	N	N
F2	10	2949	UNKNOWN	SYBR	None	30.0758	30.3382	0.233557				TRUE	0.261144	TRUE	3	25	85.167				N	N	N	N
F3	10	2949	UNKNOWN	SYBR	None	30.5233	30.3382	0.233557				TRUE	0.261144	TRUE	3	25	85.3443				N	N	N	N
F4	15	2949	UNKNOWN	SYBR	None	29.5936	29.5546	0.0955534				TRUE	0.261144	TRUE	3	24	85.5216				N	N	N	N
F5	15	2949	UNKNOWN	SYBR	None	29.6245	29.5546	0.0955534				TRUE	0.261144	TRUE	3	24	85.5216				N	N	N	N
F6	15	2949	UNKNOWN	SYBR	None	29.4457	29.5546	0.0955534				TRUE	0.261144	TRUE	3	24	85.6989				N	N	N	N
F7	20	2949	UNKNOWN	SYBR	None	28.3861	28.4888	0.105669				TRUE	0.261144	TRUE	3	23	85.6989				N	N	N	N
F8	20	2949	UNKNOWN	SYBR	None	28.5972	28.4888	0.105669				TRUE	0.261144	TRUE	3	24	85.6989				N	N	N	N
F9	20	2949	UNKNOWN	SYBR	None	28.4831	28.4888	0.105669				TRUE	0.261144	TRUE	3	23	85.5216				N	N	N	N
F10	WATER	2949	NTC	SYBR	None	31.9933	32.5783	0.507126				TRUE	0.261144	TRUE	3	27	79.6708	85.5216			Y	Y	N	Y
F11	WATER	2949	NTC	SYBR	None	32.8937	32.5783	0.507126				TRUE	0.261144	TRUE	3	27	78.607	85.3443			Y	Y	N	Y
F12	WATER	2949	NTC	SYBR	None	32.8479	32.5783	0.507126				TRUE	0.261144	TRUE	3	28	79.3162	85.167			Y	Y	N	Y
G1	JING	ACTIN	UNKNOWN	SYBR	None	20.4313	20.8418	0.390828				TRUE	0.289413	TRUE	3	14	85.6989				N	N	N	N
G2	JING	ACTIN	UNKNOWN	SYBR	None	20.8847	20.8418	0.390828				TRUE	0.289413	TRUE	3	15	86.2308				N	N	N	N
G3	JING	ACTIN	UNKNOWN	SYBR	None	21.2094	20.8418	0.390828				TRUE	0.289413	TRUE	3	16	86.0535				N	N	N	N
G4	YE	ACTIN	UNKNOWN	SYBR	None	22.8929	22.8925	0.0166158				TRUE	0.289413	TRUE	3	17	86.2308				N	N	N	N
G5	YE	ACTIN	UNKNOWN	SYBR	None	22.909	22.8925	0.0166158				TRUE	0.289413	TRUE	3	18	86.4081				N	N	N	N
G6	YE	ACTIN	UNKNOWN	SYBR	None	22.8757	22.8925	0.0166158				TRUE	0.289413	TRUE	3	18	86.5854				N	N	N	N
G7	HUA	ACTIN	UNKNOWN	SYBR	None	21.0075	20.973	0.0489096				TRUE	0.289413	TRUE	3	16	86.4081				N	N	N	N
G8	HUA	ACTIN	UNKNOWN	SYBR	None	20.9944	20.973	0.0489096				TRUE	0.289413	TRUE	3	16	86.4081				N	N	N	N
G9	HUA	ACTIN	UNKNOWN	SYBR	None	20.917	20.973	0.0489096				TRUE	0.289413	TRUE	3	16	86.2308				N	N	N	N
G10	5	ACTIN	UNKNOWN	SYBR	None	18.9667	19.1793	0.195329				TRUE	0.289413	TRUE	3	13	86.0535				N	N	N	N
G11	5	ACTIN	UNKNOWN	SYBR	None	19.2204	19.1793	0.195329				TRUE	0.289413	TRUE	3	14	85.8762				N	N	N	N
G12	5	ACTIN	UNKNOWN	SYBR	None	19.3509	19.1793	0.195329				TRUE	0.289413	TRUE	3	14	85.6989				N	N	N	N
H1	10	ACTIN	UNKNOWN	SYBR	None	18.5503	18.9346	0.733429				TRUE	0.289413	TRUE	3	12	85.8762				N	Y	N	N
H2	10	ACTIN	UNKNOWN	SYBR	None	18.4732	18.9346	0.733429				TRUE	0.289413	TRUE	3	12	86.0535				N	Y	N	N
H3	10	ACTIN	UNKNOWN	SYBR	None	19.7803	18.9346	0.733429				TRUE	0.289413	TRUE	3	15	86.0535				N	Y	N	N
H4	15	ACTIN	UNKNOWN	SYBR	None	19.4214	19.2248	0.181242				TRUE	0.289413	TRUE	3	14	85.8762				N	N	N	N
H5	15	ACTIN	UNKNOWN	SYBR	None	19.1885	19.2248	0.181242				TRUE	0.289413	TRUE	3	14	85.8762				N	N	N	N
H6	15	ACTIN	UNKNOWN	SYBR	None	19.0644	19.2248	0.181242				TRUE	0.289413	TRUE	3	13	86.2308				N	N	N	N
H7	20	ACTIN	UNKNOWN	SYBR	None	19.9504	20.0595	0.129988				TRUE	0.289413	TRUE	3	14	86.0535				N	N	N	N
H8	20	ACTIN	UNKNOWN	SYBR	None	20.0249	20.0595	0.129988				TRUE	0.289413	TRUE	3	15	86.2308				N	N	N	N
H9	20	ACTIN	UNKNOWN	SYBR	None	20.2033	20.0595	0.129988				TRUE	0.289413	TRUE	3	15	86.0535				N	N	N	N
H10	WATER	ACTIN	NTC	SYBR	None	24.6841	24.6954	0.0660748				TRUE	0.289413	TRUE	3	19	86.2308				Y	N	N	N
H11	WATER	ACTIN	NTC	SYBR	None	24.6357	24.6954	0.0660748				TRUE	0.289413	TRUE	3	19	86.2308				Y	N	N	N
H12	WATER	ACTIN	NTC	SYBR	None	24.7664	24.6954	0.0660748				TRUE	0.289413	TRUE	3	20	86.0535				Y	N	N	N

## Sheet: Raw Data
Block Type	96fast
Chemistry	SYBR_GREEN
Experiment File Name	S:\LQW\ZHB\2014.eds
Experiment Run End Time	2012-05-24 02:00:11 AM CST
Instrument Type	sds7500fast
Passive Reference	ROX
Well	Cycle	1	2	3	4	5
A1	1	146671	25187.7	66421.7	300261	2252.17
A2	1	116617	20637.8	68213.9	275356	1640.21
A3	1	115684	19411.2	73889	276500	1770.66
A4	1	108881	18395.8	69350.1	250216	14.3652
A5	1	106917	17706.9	71809	249821	784.04
A6	1	88581.4	15751.9	72779.2	251164	0
A7	1	108674	20207.3	76585.4	254364	1737.22
A8	1	121665	20100.7	77131	266087	1199.11
A9	1	116649	20070	76493.4	278278	505.831
A10	1	116587	18300.9	68954.5	259615	220.45
A11	1	121193	20105.6	73878.1	307431	810.776
A12	1	125682	21039.3	63269.1	302870	1596.67
B1	1	113125	18198.6	59691.3	250102	822.195
B2	1	130597	20753.8	78517.2	305604	285.606
B3	1	119727	20376.3	84650.2	296215	637.876
B4	1	125004	20652.5	85567.7	285737	1289.23
B5	1	119842	19846.6	92154.8	303545	344.403
B6	1	98390.8	16321.7	77680.6	256426	0
B7	1	107624	17077	76600.3	252609	0
B8	1	114480	17869.1	83313.7	280992	0
B9	1	102408	16870.9	73635.8	260890	673.259
B10	1	94900.4	16276	70730.1	257111	45.6235
B11	1	113367	18046.6	73419.4	298841	0
B12	1	99951.1	17173.2	65329.5	280233	0
C1	1	55383.9	13103.4	64267.2	270912	518.332
C2	1	112307	18834.4	82610	314760	667.23
C3	1	97390.9	17718.7	88346.6	309894	515.092
C4	1	109102	18929.1	94326.1	304231	930.545
C5	1	100458	17427.5	86441.9	276549	98.1335
C6	1	90789.2	15746.5	84244.2	264480	0
C7	1	92931.8	15895.7	77952.4	245583	0
C8	1	106400	18422.1	88855.6	283773	0
C9	1	96829.7	17050.3	85827.5	282044	119.876
C10	1	103317	16888	86973.2	302526	0
C11	1	102314	16022	79125.6	305794	540.855
C12	1	120994	18477.9	79823.2	343707	562.256
D1	1	93983.5	16280.7	71756.5	291884	2251.37
D2	1	85907	14427	73022.7	276701	137.574
D3	1	108908	18107.6	84971.9	292769	960.26
D4	1	101877	16933.4	86120.2	284166	618.483
D5	1	90580.1	15413.3	81774.2	258959	9.15139
D6	1	90133.5	14430.5	78694.5	247310	0
D7	1	78883.4	12653.1	70793.2	223584	0
D8	1	97967.4	16226.5	85164.1	275089	0
D9	1	92575.3	14898.4	80621.1	269215	0
D10	1	88406.1	14716.7	75723.5	270155	305.017
D11	1	89013.7	14211.5	77761.1	305645	0
D12	1	126382	18805.6	86386.4	362476	746.856
E1	1	154558	30607	87959.7	330550	1059.91
E2	1	163542	27571.6	81732.6	299071	715.89
E3	1	136428	24816.7	84595.4	293306	511.721
E4	1	143531	23534.3	82755	265675	358.5
E5	1	142631	23588	87007.7	268726	14.7175
E6	1	154212	24923.2	93095.6	286947	88.4445
E7	1	170936	28626	111227	329407	3883.89
E8	1	145212	25097.3	88873.3	274112	159.092
E9	1	148191	26393.5	89318.9	292024	6059.52
E10	1	126812	21840	75214.8	268007	0
E11	1	143120	23776	75357.7	288210	225.169
E12	1	132691	16748.4	66050.1	329246	0
F1	1	147295	27323.4	80699.1	337284	0
F2	1	149858	26562.5	85596.6	326181	903.03
F3	1	156696	26830.9	84386.2	288733	950.397
F4	1	144201	26121.6	89531.9	293042	2324.98
F5	1	155282	25378.8	93240.7	299495	965.252
F6	1	152542	25261.6	98341.3	315144	0
F7	1	156750	26140.2	98803.5	317868	0
F8	1	165629	27201.5	97932.4	314366	761.778
F9	1	147397	25529.7	96552.2	325936	0
F10	1	141679	24562.5	88193.5	315225	0
F11	1	120831	21132.2	66852.1	259066	0
F12	1	132003	24638.9	72801.4	314130	183.593
G1	1	103872	20389.1	71621.1	310946	0
G2	1	130066	21338.1	75632.8	296628	649.77
G3	1	115381	19616.9	76345	279923	0
G4	1	126571	21387.9	85702.8	295255	880.024
G5	1	133132	21933.7	88583.6	295730	1386.88
G6	1	131919	21958.4	89950.7	296615	853.318
G7	1	152875	26535.2	102109	334545	1258.49
G8	1	149427	24319.7	99336.2	333211	121.138
G9	1	138240	22382	87325.4	302030	0
G10	1	133690	20752.9	81100.5	300618	36.2668
G11	1	191514	28731.8	87431.3	343963	2614.53
G12	1	124478	19143.6	64179.2	282697	1416.82
H1	1	121822	19964.3	64850.6	292056	2387.32
H2	1	119762	20228.9	73588.7	307420	1150.46
H3	1	110901	20047.2	82318.1	322919	0
H4	1	129150	21003.1	84004.1	308265	1013.42
H5	1	126249	20586.2	82943.9	293450	112.773
H6	1	152107	25252.6	98813.1	347045	1188.27
H7	1	137357	20803.7	78545.6	292228	0
H8	1	140732	22887.8	91272.7	326000	595.319
H9	1	132862	21553.6	86936.7	326907	0
H10	1	133625	21289.8	82252.3	320336	0
H11	1	153163	24627	86978.1	372680	825.048
H12	1	196788	31280.1	80359.5	363518	3043.95
A1	2	146367	24760.9	65950.8	297256	1569.38
A2	2	118587	21168.3	68801.5	276500	3557.42
A3	2	115535	19334.3	72925	272912	544.436
A4	2	109633	18450.3	69100	248012	457.772
A5	2	107358	17571.5	71377.5	249093	496.116
A6	2	88445.2	16036.3	72775	250376	58.4512
A7	2	109242	20883	76346.5	251865	1187.14
A8	2	121675	20311.2	76323.7	263722	1065.87
A9	2	118317	20437.5	77372	281317	757.226
A10	2	118013	18229.5	68782.4	258326	103.274
A11	2	123243	20373.1	73179.3	304735	1131.37
A12	2	126376	21350.7	62747.8	300537	1575.32
B1	2	114613	18176.9	59815.8	249740	385.21
B2	2	131955	20702.4	78950.6	306074	24.4805
B3	2	119339	19966.2	83254.7	293004	647.241
B4	2	124143	20590.6	85582.8	286678	827.701
B5	2	121534	19901.1	92074.6	303551	0
B6	2	100028	16350.5	77375.2	255225	0
B7	2	109614	17128.5	76015.1	250327	0
B8	2	114676	17786.9	81284.6	272693	0
B9	2	102565	16432.8	71736.2	252813	461.101
B10	2	95750.4	16043.6	70688.1	257475	511.363
B11	2	114779	17940.8	72781.1	296310	0
B12	2	99575.5	17333.9	64706.3	278047	0
C1	2	56617.9	13080.1	64415	270270	454.149
C2	2	114155	19057.2	81839.2	312297	852.683
C3	2	99072.9	17775.3	88022	306209	470.554
C4	2	110009	19055.1	93080.7	300114	894.073
C5	2	100837	17476.5	85982.8	273938	334.589
C6	2	91410.4	15944.5	82711.1	260031	0
C7	2	93432.4	15662.2	76384.6	240169	40.6423
C8	2	106171	18059.1	86767.2	276733	0
C9	2	98268.9	16802	82881.7	272060	30.8772
C10	2	104097	16942.5	84612.2	294435	245.106
C11	2	103874	15876	78615.1	303439	403.425
C12	2	120915	18589.6	78768.5	340929	871.962
D1	2	94457.4	16146	71582.6	291033	1606.27
D2	2	85929.6	14726.8	72377.8	273739	0
D3	2	110625	18245.7	85385.4	292653	1382.44
D4	2	102127	16990.1	86316.3	285540	997.963
D5	2	90993.2	15518.7	80839	255990	323.044
D6	2	90943.4	14456.6	78913.3	248180	0
D7	2	79716.9	12744.4	70329.5	221132	0
D8	2	98717.9	16276.9	83328.4	267902	0
D9	2	93722.5	15183.4	80116.5	267767	0
D10	2	89553.7	15112.6	76417.9	271021	191.437
D11	2	88907.3	14086.8	77730.8	304754	0
D12	2	125654	18528	86454.2	362239	467.441
E1	2	155002	31229.2	88103.1	327511	1250.81
E2	2	168605	28196.1	81102.6	297124	1015.69
E3	2	136533	24388.7	83949.2	289850	660.813
E4	2	147360	23870.4	83108.1	265391	121.87
E5	2	144717	23540.7	85767	266393	194.271
E6	2	154504	24935.8	91823.2	282287	189.808
E7	2	173428	28749.9	107950	321889	5782.82
E8	2	146679	25334.4	88172	273059	0
E9	2	150393	26119.6	88156.1	289272	742.583
E10	2	131560	22754.2	74343.6	265954	626.275
E11	2	144706	24052.4	75234.5	287962	103.026
E12	2	132217	16236.5	65265.3	326159	0
F1	2	145726	26588.6	79832.7	333126	0
F2	2	152624	27186.7	85643.1	326796	913.202
F3	2	159945	26831.9	83846.2	287485	1142.42
F4	2	144568	26372.2	89380.4	292321	2028.48
F5	2	157711	25329.5	93129.9	298864	721.55
F6	2	153966	25664.5	97871.3	314721	0
F7	2	156927	26135.5	97656	314409	0
F8	2	164986	27811	97272.3	314327	579.123
F9	2	147558	25240.3	92115.2	313521	0
F10	2	146991	25704.9	86905.6	313805	0
F11	2	122722	21695.9	66927.6	259099	0
F12	2	133464	24874.1	72428.7	313749	0
G1	2	104369	20269.7	71159.1	310159	0
G2	2	130235	21507.7	75548.2	297318	1020.14
G3	2	122810	21317.3	76238.7	279538	411.965
G4	2	128340	21549	85411.9	295234	505.166
G5	2	132844	22067	88252.2	294435	1092.28
G6	2	132064	22138.7	89529.8	295171	629.721
G7	2	151940	26472.5	101115	330872	1513.3
G8	2	151613	24614.2	98406	330740	83.6176
G9	2	138726	22507.2	86624.9	299113	0
G10	2	133585	21270.5	79781.8	298826	201.601
G11	2	192640	28473.3	86114	341905	732.174
G12	2	124566	19215.1	63974.8	281370	1348.02
H1	2	122287	20208.6	64362.3	289976	2360.37
H2	2	118971	20225.3	72956.6	305793	814.257
H3	2	111297	20243.2	82328.2	322493	0
H4	2	129195	20940.5	83393.6	307319	668.33
H5	2	127199	20656	82117.5	291520	116.018
H6	2	153360	25676.6	98105.4	345957	768.548
H7	2	137882	20875.5	78070.7	290740	0
H8	2	141175	23046.7	90947	324461	827.133
H9	2	133347	21607.6	87437.2	329022	1109.84
H10	2	133440	21315.2	81765.3	318728	0
H11	2	153833	25214.2	86713.1	370134	688.238
H12	2	197552	31180.6	80031.5	361423	3552.12
A1	3	145552	24367.4	65360.4	296525	2473.81
A2	3	117657	20834.5	68793.8	276829	4508.58
A3	3	114602	19308.7	72253.6	271857	881.846
A4	3	110424	18312.4	68490.7	245998	471.18
A5	3	107038	17658	70970.5	247046	398.664
A6	3	87768	15884.7	71861.1	248876	0
A7	3	108438	21177.8	76735.3	251424	1084.42
A8	3	121875	20550.4	76349.6	261804	955.43
A9	3	118344	20628.5	76991.1	279585	1055.25
A10	3	117329	18381.1	68582.2	257296	0
A11	3	122997	20110.2	72813.5	303512	942.033
A12	3	126777	21124.6	62961.6	298913	1520.63
B1	3	113303	18289.7	59323	248495	184.321
B2	3	131747	20750.2	78613.2	305323	216.828
B3	3	118717	19999	83163	292037	62.4348
B4	3	124949	20644.7	85293	285261	936.236
B5	3	121417	19895.2	91469.4	301211	0
B6	3	100081	16202.5	77088.3	254650	0
B7	3	109106	17388.6	76282.8	251162	0
B8	3	115188	17774.2	80282.2	268758	0
B9	3	102696	16783.8	72083.9	253175	451.691
B10	3	95316.4	16067.3	70813.1	256979	59.8808
B11	3	113381	17852.5	72778.9	296222	0
B12	3	99639.9	17460.4	64491	277531	14.2138
C1	3	56379.1	13111.2	64184.7	269188	139.738
C2	3	114312	18950.5	81775.9	310183	471.697
C3	3	98257.9	17938.6	87752.7	305943	273.038
C4	3	110641	19052.2	92937.4	300634	600.32
C5	3	101121	17496.5	86205.3	274738	144.864
C6	3	91754.1	16015.7	82176.3	260234	0
C7	3	93162.5	15822.8	75778.7	237842	0
C8	3	106180	18213.3	86462.1	275221	0
C9	3	98066.1	16744.1	81770.1	268155	183.447
C10	3	103735	16814.7	84371.3	292563	196.473
C11	3	104017	16246.5	78860	303038	729.268
C12	3	121704	18195.6	78909.5	339283	903.863
D1	3	94598.6	16130.6	71390.2	289512	2249.84
D2	3	85801.1	14350.1	71518.1	271718	0
D3	3	110496	18035.3	85039.1	291831	1688.73
D4	3	102446	16880.5	86447.7	285378	851.634
D5	3	91378.5	15213.5	81002	255956	0
D6	3	90133.5	14564.5	78498.2	248062	0
D7	3	79877	13009.4	70414.5	221730	0
D8	3	99455.6	16214.8	83219.5	266469	467.112
D9	3	94293.9	15194.9	79982.6	268503	0
D10	3	88488.8	14784.7	76229.9	270350	242.731
D11	3	88794.9	13978.4	77634.9	304345	0
D12	3	125564	18557.7	86148.1	362038	712.192
E1	3	154877	31325.1	87691.5	326774	946.894
E2	3	166986	28124.5	80942.2	296994	652.943
E3	3	136976	24102.4	83713	288858	386.677
E4	3	145897	23693.3	82068.3	263906	0
E5	3	144566	23651.6	85848.5	267018	877.164
E6	3	155212	25150.5	92002.3	282573	264.34
E7	3	170940	28226.3	106231	315963	0
E8	3	145606	25274.9	88111.1	271975	493.291
E9	3	149868	26471.5	88274.1	288822	224.629
E10	3	130796	22702.8	74555	266102	0
E11	3	145120	24039.6	75113.3	288137	255.971
E12	3	130573	16189.2	64874.3	324541	0
F1	3	145847	27129.9	79465	331386	0
F2	3	151461	26755	85229.2	325112	827.306
F3	3	158757	26981.6	83408.5	287023	1383.89
F4	3	145369	26470.2	89426.6	292685	2452.18
F5	3	158147	25307.7	92962.8	298257	798.961
F6	3	154311	25721	98040.6	313818	0
F7	3	156892	26269.2	97756.5	314162	149.085
F8	3	166600	27391.7	97733.2	314584	1051.88
F9	3	145121	25096.6	91184.9	308676	0
F10	3	146160	25586.7	87242	312354	0
F11	3	122854	21862.4	66771.4	258604	0
F12	3	131642	24408.4	72168.5	311140	86.1992
G1	3	104686	19991.8	71313.1	308456	0
G2	3	129565	21150.4	75350.7	295035	1583.27
G3	3	125477	21916.7	76073.1	278560	729.226
G4	3	127306	21330	84993.3	294028	957.673
G5	3	133213	21753.9	88229	294931	1244.57
G6	3	132255	21969.4	89283.2	294573	289.307
G7	3	152540	26687.5	100884	329869	1297.4
G8	3	148974	24598.1	98344.4	329577	13.9363
G9	3	137590	22615.6	86563.3	299354	0
G10	3	132917	20762.5	79941.6	296295	259.201
G11	3	193270	28563.4	85696.1	338397	907.428
G12	3	122432	19083.3	63413.2	279155	1595.41
H1	3	120534	19994.4	64157	289202	2724.92
H2	3	118524	20197.9	72538.6	302774	853.35
H3	3	111215	19828.4	81325	319171	195.518
H4	3	129075	20692.2	82836.4	304897	349.644
H5	3	125719	20390	81342.5	289332	0
H6	3	153508	25588.1	97679.5	344024	1174.09
H7	3	136399	20680.1	77648.3	289344	0.857339
H8	3	140348	22819.3	90717.7	322905	601.633
H9	3	132372	21216	86853.4	326830	0
H10	3	132597	21116.6	81339.8	316631	113.384
H11	3	152072	24572.7	85833.9	368883	594.705
H12	3	195815	31832.5	79553.5	360201	3665.23
A1	4	146309	24754.3	65094.7	296480	1405.74
A2	4	118264	20925.8	68821.5	276704	3933.99
A3	4	115218	19343.2	72342.7	270883	726.578
A4	4	108803	18286.1	68405.1	245834	81.403
A5	4	106561	17520.9	70789	246507	517.378
A6	4	88339.4	15728.2	71869.5	248310	0
A7	4	109564	21319.7	76812.7	250286	1277.44
A8	4	122142	20720.6	76292.7	261980	996.627
A9	4	118114	20944.8	77854.8	280347	1445.52
A10	4	118482	18505.6	68495.6	256067	505.445
A11	4	122818	20203.9	72825.9	302860	903.701
A12	4	126531	21377.8	62057	295636	1004.42
B1	4	113488	17984.9	59224.2	248372	117.013
B2	4	131916	20861.4	78764.5	305786	244.805
B3	4	118802	20064.6	83307.3	291973	287.2
B4	4	124356	20453.1	85486.2	284735	501.084
B5	4	120479	20091.3	91795.1	301048	0
B6	4	99617.2	16375.9	77087.4	254156	0
B7	4	110313	17484.1	76362.8	251713	0
B8	4	115202	17713.7	80173.3	269373	0
B9	4	103104	17075.3	71914.7	253523	366.999
B10	4	95634	16081	70655.5	256900	227.167
B11	4	113887	17741.3	72792	295446	0
B12	4	100066	17309.1	64228.1	277700	0
C1	4	56428.6	13162	63787.8	268136	196.609
C2	4	114826	19131.8	81493.6	310601	693.435
C3	4	98158.9	18292	87652.6	305814	464.745
C4	4	111524	19178.1	92789.1	300050	836.899
C5	4	100857	17654.7	86225.9	274475	137.387
C6	4	91686.5	15611.9	82378.7	259952	0
C7	4	92931.8	15579.2	75617.2	236700	0
C8	4	106286	18169	86406.6	276155	0
C9	4	98422.9	16910.8	81774.6	268757	341.466
C10	4	103848	16682.2	84416.6	292873	262.613
C11	4	103238	16068.2	78421.3	302235	1211.38
C12	4	121833	18244.2	78690.3	338973	923.801
D1	4	93989.2	16186.6	71227	289757	2202.51
D2	4	86032	14576.5	71621.2	271625	0
D3	4	111220	18458	84924.9	290559	1389.8
D4	4	102805	16986.2	86595.8	285267	690.672
D5	4	91726.1	15355.2	80779.4	256030	168.386
D6	4	91068.5	14554	78447.7	247497	0
D7	4	79976.5	12836.5	70340.3	221948	0
D8	4	100059	16220.6	83068	266619	481.026
D9	4	94327.1	15548.6	80374.6	268510	0
D10	4	89161.7	14571.5	76393.5	270165	299.521
D11	4	89078.8	14217.5	77438.8	305106	0
D12	4	125025	18368	86029.9	361620	0
E1	4	153641	31181.3	87793.7	327190	1184.33
E2	4	167532	28033.1	80541.5	296439	827.914
E3	4	137443	24421.5	83571.2	289144	579.053
E4	4	145993	23651.1	82263.9	264270	18.2804
E5	4	142945	23473.2	85870.4	266330	508.245
E6	4	153992	24922.2	92255.7	282670	581.349
E7	4	170439	28339.3	106318	315424	0
E8	4	145459	24911.4	87789.3	272214	135.602
E9	4	150485	26649	87935.3	288387	58.8832
E10	4	130168	22727.5	74571.7	266108	545.368
E11	4	144937	23734.2	74775	287921	75.4105
E12	4	130310	16525.9	64750.2	323908	0
F1	4	146606	26860.5	79690.5	331552	0
F2	4	151248	26722.3	85089.7	324401	780.968
F3	4	159600	26734.5	83644.5	286657	1332.5
F4	4	145041	26198.8	89374.4	292321	2294.64
F5	4	156581	25556.2	92655.7	297556	642.227
F6	4	153860	25345.9	97694.6	312348	13.6653
F7	4	157587	26194.3	97598.5	314418	0
F8	4	166665	27566.2	97741.8	314770	1009.97
F9	4	147489	25679.8	91317.4	309170	0
F10	4	145313	25431.5	86554	311539	0
F11	4	121618	21285	66638	258755	0
F12	4	130185	24421.4	71777.1	312037	0
G1	4	103710	20007.1	71178.5	308684	0
G2	4	129404	21405.5	75175	294796	1152.26
G3	4	125126	22355.2	75824.3	278990	612.739
G4	4	127889	21463.9	84567.4	293707	1013.9
G5	4	133063	21629.8	88349.7	294874	862.042
G6	4	131774	21791.8	88740.7	292828	373.269
G7	4	152118	26429.1	100917	329725	1062.04
G8	4	149066	24393.8	98496.8	329309	0
G9	4	138197	22700.4	86714.4	299077	0
G10	4	132335	20660.3	79883.7	296143	0
G11	4	193366	28607.2	85590.7	336759	952.864
G12	4	122900	18757.9	63324.2	278766	1308.34
H1	4	120701	19894.5	64096.7	289068	2705.06
H2	4	117626	20067.9	72378.6	303089	894.677
H3	4	109859	19877.2	81348.2	319382	0
H4	4	127126	20844.8	82673.7	303706	638.282
H5	4	126238	20493.1	81668.5	289380	172.81
H6	4	154811	25775.6	97903.1	343253	819.596
H7	4	136889	20597.9	77703.4	287881	0
H8	4	140423	22543.5	90471.8	321989	616.967
H9	4	131495	21011.5	86924.1	326432	0
H10	4	131571	21078.5	81191.8	315572	133.591
H11	4	151936	24454.1	85782.8	367527	727.326
H12	4	194404	31022.6	79118.3	358653	3481.21
A1	5	147080	24990.1	65195	295937	2014.16
A2	5	117850	21081.6	68463.4	274953	3883.63
A3	5	114950	19372.8	72397.5	271538	603.159
A4	5	109312	18336.7	68636.4	245228	0
A5	5	107509	17633.2	70938.1	247018	650.266
A6	5	88383.6	15730.7	71812.4	248468	0
A7	5	109072	21832.8	77245.9	250777	1002.4
A8	5	122113	21106.3	76907.6	262619	543.455
A9	5	117922	21191.8	77757.9	280901	2627.48
A10	5	118927	18564.5	68494.7	256024	518.354
A11	5	122095	20251.9	72771.9	302472	462.305
A12	5	127229	21195	61845.7	295486	960.401
B1	5	113216	18360.3	59251	247837	295.12
B2	5	129477	20466.8	78800.4	305589	579.373
B3	5	118881	19946.7	83308.3	293332	708.635
B4	5	123713	20713.4	85425.8	285279	666.421
B5	5	121565	19757.4	91672.9	301203	0
B6	5	100175	16386	77112.9	253657	0
B7	5	110497	17476.7	76515.1	252712	0
B8	5	115245	18040.6	80322.6	269600	0
B9	5	103076	16774.8	71862.2	252855	632.196
B10	5	95785.7	15968.8	70908.2	256828	221.464
B11	5	113688	17667.2	72673.2	295993	0
B12	5	99594.1	17102.3	64353.8	277432	0
C1	5	55793.5	13247.4	64049.9	268531	127.552
C2	5	114120	19157.7	81618.2	310919	768.02
C3	5	99186.3	18313.2	87745.9	306536	487.014
C4	5	110670	18845.4	92897.8	299768	900.973
C5	5	101405	17702.9	86632.7	275541	411.226
C6	5	91992.9	16001.5	82829	260328	0
C7	5	93771.6	15509.5	75815.7	237247	0
C8	5	107098	18341.7	86442.9	275466	0
C9	5	97337.9	16790.6	82335	269485	160.743
C10	5	104798	16639	84376.1	293351	0
C11	5	103519	15667.7	78716.3	302473	670.528
C12	5	120548	18281	78691.6	338209	929.118
D1	5	94412.8	16109.5	71214.7	289264	1868.89
D2	5	86969.2	14406.7	72041	272060	104.249
D3	5	110076	18232.9	84928.6	291363	1151.58
D4	5	102639	16810.4	86469.3	285621	828.222
D5	5	91375.2	15397.9	81053.2	256357	239.766
D6	5	90534.4	14472.3	78848.5	247714	0
D7	5	79935.3	12978.7	70360.3	221878	0
D8	5	98922.7	16224.5	83120.5	267084	108.33
D9	5	94317.2	15364.6	80524.1	269553	0
D10	5	88756.7	14659.3	76519.2	271492	0
D11	5	88426.3	13781.9	77448.9	305344	0
D12	5	123901	18284.3	85878.9	361702	643.914
E1	5	155452	30750.9	86810.4	325535	801.583
E2	5	167715	27867.9	80493.1	296224	987.949
E3	5	137264	24301	83852	288847	668.508
E4	5	145880	23410.6	82176.4	264850	340.219
E5	5	143298	23643.9	86147.7	265879	738.819
E6	5	154935	25130.1	91984.2	282304	557.499
E7	5	170421	28500.1	106463	314960	0
E8	5	145309	25061.8	88072.6	271913	100.367
E9	5	149801	26793	88290.4	289082	129.761
E10	5	130283	22767.1	74519.8	266435	150.825
E11	5	144417	23843.5	75165.5	287433	52.0439
E12	5	129817	16414.7	64739.9	323741	0
F1	5	145967	26652.7	79342.5	332654	0
F2	5	151384	26772.5	85112.4	324779	783.229
F3	5	160699	26906.7	83752.7	286743	1526.45
F4	5	144956	26393.9	89352.3	292583	2481.54
F5	5	157810	25887.3	92819.9	296743	784.626
F6	5	154070	25651.9	97619.7	312511	0
F7	5	156638	26148.8	97755.5	313933	496.629
F8	5	166380	27480	97694.4	314754	853.105
F9	5	147367	25409.8	91539.5	310383	0
F10	5	145239	25433.7	86434.2	311078	0
F11	5	121884	21587.4	66454	258684	0
F12	5	130894	24551.4	71944.7	311916	0
G1	5	103685	20090.5	71075	308523	0
G2	5	130009	21452.7	75372.4	294596	1345.02
G3	5	126716	22568.6	75958.3	279047	136.375
G4	5	126732	21361.7	84822.8	293296	602.45
G5	5	132929	21622.5	88138	294389	1153.92
G6	5	131725	21746.3	88735.2	293359	822.288
G7	5	151794	26297.1	101043	329618	1317.82
G8	5	148618	24680.9	98322.8	329368	0
G9	5	137643	22800.9	86803.8	298928	0
G10	5	131552	20773.3	79680	295452	120.534
G11	5	191961	28631.1	85581.6	336722	911.322
G12	5	122042	18411.5	63580.5	277840	1402.26
H1	5	120582	19996	64145.5	288440	2449.73
H2	5	118108	19954.6	72447.3	302348	472.47
H3	5	110557	19960.1	81433.9	319184	0
H4	5	127608	20599.3	82447.4	303458	840.42
H5	5	126725	20647.7	81604.7	289636	30.0187
H6	5	154760	25824.6	97605.9	342078	880.097
H7	5	135978	20737.2	77352.7	287764	0
H8	5	139873	22318	90286.5	321107	868.625
H9	5	131384	21216	86980.2	326514	0
H10	5	132242	21093.5	81071.2	316303	49.3948
H11	5	152654	24818.5	85868.4	367085	695.218
H12	5	192597	30923.1	78918.9	358218	2777.2
A1	6	145612	24930.3	65323.5	296275	1904.08
A2	6	118086	21191.7	68611.9	276095	3911.1
A3	6	115625	19454.5	72466	271448	895.781
A4	6	109229	18029.1	68519.8	245751	506.614
A5	6	107433	17713.7	70953.8	247353	749.489
A6	6	88921.8	15781.2	71822.4	248554	0
A7	6	109152	22079.8	77580.3	250960	1207.03
A8	6	122914	21204	77579.4	263498	1166.68
A9	6	117926	21137.8	78028	280838	3083.65
A10	6	118863	18880.2	68707.5	256269	671.279
A11	6	123488	20457.6	72957.6	302925	415.842
A12	6	127762	21506.5	62100	295750	1007.09
B1	6	112458	18148.7	59204.7	248356	0
B2	6	130064	20768.1	78833.9	305072	0
B3	6	119281	19959	83507.2	293212	284.078
B4	6	124066	20540.5	85360.4	285009	917.978
B5	6	121557	19966.5	91923.6	301715	0
B6	6	99902.1	16274.4	77169	253846	0
B7	6	110741	17712.6	77275.1	253153	0
B8	6	115511	17647.8	80179.9	269353	0
B9	6	103948	16829.4	72314.9	253223	258.353
B10	6	95461.4	15942.4	70816.8	256870	0
B11	6	113433	17740.2	72730.9	296047	0
B12	6	100309	16664	64553.3	277973	0
C1	6	55466.2	13283.6	64214.1	269845	316.848
C2	6	114767	19263.4	81485.5	310207	221.738
C3	6	99140.2	18099	87903.4	306248	499.601
C4	6	110120	18890.6	92934.4	300142	982.79
C5	6	101176	17604.7	86097.8	275056	611.232
C6	6	92767	16155.1	82712.8	260561	0
C7	6	93085.6	15858.9	75816.5	237124	88.6002
C8	6	106944	18618.9	86933.7	276153	0
C9	6	98403.7	16943.3	82516.3	270152	82.6419
C10	6	103253	17095.7	84338.6	293519	183.829
C11	6	104204	16206.7	78621.6	303068	502.064
C12	6	122076	18533.1	78663.4	338067	474.528
D1	6	94778.8	15914.1	71139.3	289410	2254.42
D2	6	86282.8	14543.8	71931.1	272839	0
D3	6	111194	18337.2	85110.9	291483	1462.46
D4	6	102463	16794	86505.6	285303	1065.27
D5	6	91639.7	15394.2	81121.2	256259	0
D6	6	90302.7	14387	78644	248464	0
D7	6	80638.6	13249.4	70883.2	222827	0
D8	6	100583	16030.6	83112.6	267005	0
D9	6	95623.5	15436.1	80668.6	269630	0
D10	6	89225.4	14933.5	76594.2	272072	664.076
D11	6	88962.5	13872	77961.2	305673	0
D12	6	124169	18575.7	85992.9	362130	543.072
E1	6	154417	30524.7	86849.7	326007	1270.76
E2	6	167913	27849.2	80658.9	296446	483.306
E3	6	137318	24495.7	84006.5	289456	767.582
E4	6	144940	23730.6	82581	264683	0
E5	6	143655	23352.7	86101	266701	420.921
E6	6	153895	25196.2	92310.1	282896	0
E7	6	171622	28457.7	106513	316333	0
E8	6	145255	25151.6	88383.7	272667	0
E9	6	150012	26844.9	88682.3	289908	56.7024
E10	6	131217	22429	74656.8	267373	230.733
E11	6	144605	23828.5	75204.2	288601	452.463
E12	6	130584	16221.7	64816	323227	0
F1	6	146872	26617.4	79813.1	332968	0
F2	6	151699	26851.8	85290.4	324632	1210.44
F3	6	161270	27034.7	84010.4	287172	1041.56
F4	6	144642	26519.7	89145.6	291808	2781.95
F5	6	156673	25635.9	92939.5	297331	569.594
F6	6	153963	25475.1	97648.4	313069	0
F7	6	157976	26378.3	97821.8	314831	250.735
F8	6	166193	27721.7	97891.5	315140	757.48
F9	6	147222	25510.2	91771.6	309976	0
F10	6	143851	25302.4	86770.6	312087	0
F11	6	120933	21251.3	66588.4	258502	0
F12	6	130947	24372.9	71912.7	311715	0
G1	6	105121	20380.8	71152.7	309376	0
G2	6	129404	21561.6	75152.2	295257	1046.13
G3	6	126846	22961.4	76155.5	279120	671.456
G4	6	127222	21349.9	85094.5	293972	783.632
G5	6	132760	21979.4	88351.5	295497	1085.03
G6	6	131248	21575.2	89089.4	293680	802.21
G7	6	152155	26461	101338	329890	948.246
G8	6	148971	24580.9	98332.5	330073	162.947
G9	6	137936	22799.9	86838.6	298630	0
G10	6	132006	20648.5	80057.3	296631	0
G11	6	192370	28514.4	85400.6	336603	620.53
G12	6	122323	18609.2	63090.6	277867	1068.9
H1	6	121252	19672.4	64237.4	289698	2085.18
H2	6	117538	19902.2	72584.8	303535	816.49
H3	6	110018	19569.2	81749.5	319850	0
H4	6	128392	20930.1	82359.5	303641	444.339
H5	6	126409	20478.1	81818.7	290140	0
H6	6	155152	25687.1	97475.2	342992	1366.94
H7	6	136294	20367.1	77416.5	288000	0
H8	6	139958	22860.4	90208.5	321883	595.319
H9	6	131699	21217	87105.1	326927	0
H10	6	131424	20950.3	81041.7	316611	269.426
H11	6	152313	24624.2	85650.3	367592	416.014
H12	6	194008	31084.7	78945.3	358030	3148.62
A1	7	146175	24663	65723.5	296118	1796.97
A2	7	118719	21023	68698.4	275285	3806.94
A3	7	115705	19478.2	72493.4	271754	494.67
A4	7	109292	18151.9	68602.6	246098	0
A5	7	106909	17624.6	71171.4	247490	685.703
A6	7	88581.4	15898.6	72359.2	248697	56.757
A7	7	109431	22290.9	77844.7	251446	1155.66
A8	7	122815	21229.3	77832.1	263591	754.702
A9	7	118863	21255.4	78184.3	281203	2482.53
A10	7	119099	18724.7	68716.3	256387	667.307
A11	7	123826	20638.2	72998.1	302758	505.283
A12	7	128708	21777.3	62089.9	295894	1164.49
B1	7	114069	17795	59376.5	248315	416.275
B2	7	130477	20539.7	78659.4	305057	480.285
B3	7	120080	20206.1	83730.9	294087	258.064
B4	7	124709	20598.5	85294	285495	938.265
B5	7	122217	19850.6	91844.5	301797	0
B6	7	100051	16501.9	77216.4	254048	0
B7	7	111599	17714.3	76925.7	253551	0
B8	7	115952	17804.9	80477.4	269724	0
B9	7	103932	17006.9	71898.6	253296	550.926
B10	7	95372.6	15903.2	71080.8	257983	360.235
B11	7	114043	17654.1	72859.5	296433	63.8041
B12	7	100547	17126	64671.1	278475	0
C1	7	56234.9	13175	64225.5	269131	215.294
C2	7	114786	19191.9	81935.7	311346	717.625
C3	7	100211	18215.2	87775.1	307200	103.599
C4	7	110882	18989.7	93060.9	300919	1160.22
C5	7	101111	17536.5	86445.7	276145	528.052
C6	7	91610.4	15988.8	82831.4	260813	0
C7	7	93546.2	15999.9	75944.3	238156	52.835
C8	7	107101	18451.7	87196.8	276265	0
C9	7	98642.1	17085.5	82486.4	270090	161.651
C10	7	105216	16971.7	84652.6	294802	97.2641
C11	7	103811	15969.4	78782.7	303100	495.415
C12	7	123089	18596.1	78986.4	338940	877.279
D1	7	94439.6	16069	71120.8	289386	1946.76
D2	7	86918	14285.5	71957.1	272466	0
D3	7	111622	18462.6	84982.9	291574	1426.59
D4	7	103118	16868	86746.8	285945	586.291
D5	7	91722.8	15403.3	81384.8	256715	0
D6	7	90937.8	14136.5	79038.5	248422	0
D7	7	80114.9	13061.1	70835.7	222625	0
D8	7	100090	16275.9	83259.1	267908	137.152
D9	7	95729.5	15594.3	80807.4	269784	0
D10	7	89066	14658.4	76710	272241	0
D11	7	88915.1	13763.6	78064.3	306073	0
D12	7	124872	18350	85960	361919	609.249
E1	7	155071	30241.2	86781.9	326135	667.669
E2	7	167391	27666.3	81528	296852	741.495
E3	7	137727	24569.9	83956	289474	729.107
E4	7	146121	23696.4	82618.1	265633	242.724
E5	7	143092	23515.7	86221.3	266906	777.085
E6	7	154565	25176.8	91958	283040	551.536
E7	7	170758	28602.1	106345	316931	0
E8	7	145846	25168.4	88550.5	272999	179.379
E9	7	150189	27033.3	88688.8	290011	196.277
E10	7	130241	22409.3	75021.9	267311	0
E11	7	144354	23833.8	75271	288566	195.43
E12	7	130299	16143	64852.6	323199	0
F1	7	146145	26455.2	79686.8	333532	0
F2	7	151286	26743.3	85052.3	324873	1203.66
F3	7	162550	27172.5	84112.7	286608	993.068
F4	7	145122	26154.3	89451.7	292500	2475.67
F5	7	156846	25448.1	92842.3	298302	862.993
F6	7	153040	25262.5	97542.9	313656	0
F7	7	158045	26459.9	97772.1	314872	338.83
F8	7	167741	27687	98059.5	315435	445.893
F9	7	147275	25622.6	91738.7	311049	0
F10	7	144219	25376.2	86663.9	312085	0
F11	7	121319	21311.3	66903.8	258833	0
F12	7	130364	24221.6	72135.4	312412	83.9603
G1	7	105013	20289.1	71534.4	309637	0
G2	7	130215	21379.6	75274.8	294901	563.134
G3	7	126898	22926.5	76016.7	279833	614.633
G4	7	127283	21395.2	85180.3	293940	635.474
G5	7	132058	21961.1	88594.8	295586	1364.22
G6	7	132397	21594.3	89205.3	293008	606.905
G7	7	151224	26617.2	101709	330401	1610.56
G8	7	149754	24634.6	98431.9	330293	0
G9	7	136803	22917.2	87128.7	299544	0
G10	7	132332	20502.1	79411.9	295684	221.867
G11	7	192447	28694.7	85720.9	336897	721.788
G12	7	121292	18752.3	62833	277926	1920.84
H1	7	122120	19826.3	64497.3	289895	2227.03
H2	7	118091	19946.3	72606.2	303527	958.343
H3	7	110350	19912.4	81701.1	319798	0
H4	7	128238	20758.6	82784.9	303980	595.487
H5	7	126412	20443.2	81798.8	290264	85.9995
H6	7	154866	25638.1	97825.7	343156	770.439
H7	7	136713	20719	77371	288137	0
H8	7	140000	22224.8	90414.9	322545	528.571
H9	7	132619	21237.2	86989	327358	0
H10	7	130901	20758.7	81202.1	316539	111.138
H11	7	152550	24241.3	85931.9	368055	576.556
H12	7	191097	31596.3	78833.2	357748	2783.96
A1	8	146095	24880.5	65663	296189	1527.72
A2	8	118926	21113.2	68717.3	275931	3460.13
A3	8	117292	19379.7	72686.2	271651	620.079
A4	8	109669	17920.2	68782.2	246380	97.6836
A5	8	106985	17899.7	71238.9	247877	43.4101
A6	8	89092	15958.9	72325.6	249423	0
A7	8	109148	22498.9	78329.8	251580	1173.06
A8	8	123079	21718.6	77897.6	264701	859.887
A9	8	118680	21311.4	78148.7	281587	2546.39
A10	8	120205	18855.1	68959.3	256564	399.192
A11	8	124381	20470.2	72874.3	303172	691.134
A12	8	128593	21610.7	62200	294880	1416.59
B1	8	113098	18140	59023.6	248140	293.049
B2	8	129911	20630.6	78617.8	305617	0
B3	8	120521	20310.7	83897.8	294602	239.333
B4	8	125241	20704.6	85773	285746	697.866
B5	8	122252	20134	91868.1	301520	6.16842
B6	8	100428	16328.5	77652.5	254515	0
B7	8	111475	17892.1	77023.8	253971	0
B8	8	115210	17746.2	80482.1	269944	0
B9	8	104331	16838.3	72133	254089	649.306
B10	8	95542.5	16298.8	70944.6	257745	136.87
B11	8	113728	17456.8	73059.9	297206	0
B12	8	100447	17101.2	64709.7	278264	0
C1	8	56559.6	13320.7	64179	269537	194.171
C2	8	115401	19390.8	81926.7	311732	910.134
C3	8	100214	18233.4	88135.7	308329	639.025
C4	8	111163	18845.4	93489.9	301657	729.453
C5	8	101153	17532.9	86889.9	276308	0
C6	8	92772.3	16175.7	82939.6	261519	0
C7	8	93916.1	16189.4	76266.5	238255	0
C8	8	106561	18528.3	87489.5	277101	0
C9	8	98809.2	17201.3	82552.6	270770	362.353
C10	8	104963	16859.8	85147.8	295048	246.078
C11	8	104789	16113.3	78769.7	303483	627.303
C12	8	122642	17876.5	78839	338944	457.248
D1	8	94664.4	16292.8	71118.5	289303	1849.04
D2	8	86497.1	14407.6	72035.8	272995	25.6349
D3	8	111490	18423.2	85108.2	291670	1437.63
D4	8	103202	16903.6	86641.9	286295	934.554
D5	8	91577.5	15533.2	81464.9	257308	0
D6	8	90504.8	14446.2	79099.7	248668	0
D7	8	80536.1	13012.7	70830.7	222435	0
D8	8	100502	16279.8	83503.7	267880	0
D9	8	95154.5	15354.1	81002.4	270833	0
D10	8	89171.1	14622.6	76712.7	272191	249.143
D11	8	88258.8	13842.7	78150.2	307110	0
D12	8	125155	18198.5	86124.4	362403	637.611
E1	8	154824	30719.6	86897.8	326059	915.552
E2	8	168086	28035.3	81022.9	296730	802.309
E3	8	138512	24446.5	83996.8	289798	22.1233
E4	8	144421	23726.5	82602.6	266231	0
E5	8	144597	23668	86428.1	267198	459.187
E6	8	154859	25201	92120	283229	82.482
E7	8	171371	28515.3	106661	316606	0
E8	8	145266	25082.7	88702.3	272921	0
E9	8	150075	27213	89106.7	290171	0
E10	8	131189	22754.2	75025.9	267438	487.435
E11	8	144754	23690.2	75483	288666	69.0378
E12	8	130263	16332	64745.5	323447	0
F1	8	145554	26643.5	79695.4	332976	0
F2	8	151818	26625.5	85347.1	324714	724.458
F3	8	163995	27550.5	84127.5	286984	1299.52
F4	8	145566	26474.2	89769.8	292806	2468.82
F5	8	157531	25489.8	93326.2	298334	698.613
F6	8	153979	25349.5	97850	313480	0
F7	8	159120	26329	98031.4	315550	16.4575
F8	8	167345	27525.2	97968	315770	654.334
F9	8	147329	25335.3	92120.7	310788	0
F10	8	144026	25312.2	86655.2	312463	0
F11	8	121335	21516.8	66868.6	258810	0
F12	8	130277	24380	72096.9	311972	0
G1	8	105225	20425.3	71658.6	310610	0
G2	8	130700	21784.1	75668.6	295589	916.176
G3	8	128059	23432.8	76077	279647	352.301
G4	8	127437	21453.1	85113.7	294140	732.758
G5	8	133510	21819.6	88782.3	296365	1420.42
G6	8	131316	21476.9	89189.5	293281	511.99
G7	8	151865	26624.9	101522	331225	1085.38
G8	8	149366	24433.6	98688	331182	0
G9	8	137939	23254.2	87620.5	299186	0
G10	8	133239	20651.7	80002.7	297235	0
G11	8	193519	28743.8	85483.9	338292	421.909
G12	8	121276	18837.8	63024.2	278758	1359.93
H1	8	121879	19585.2	63937.3	288747	2248.31
H2	8	117715	19899.8	72655.7	303636	1006.37
H3	8	109851	19942.5	81765.6	320332	0
H4	8	128070	20409.8	83095.3	303575	907.799
H5	8	126665	20305.2	81929.1	289806	0
H6	8	155633	25982.3	97751.1	343010	762.876
H7	8	136697	20757.9	77644.8	288191	0
H8	8	140459	22835.8	90172.7	322833	208.362
H9	8	131533	21299.9	87032.5	326751	0
H10	8	131496	20794.5	81451.3	317079	130.223
H11	8	151915	24551.3	86188.6	368508	670.09
H12	8	194105	31196.6	79146.4	358112	2689.41
A1	9	148205	24784.2	65707.3	295974	1518.8
A2	9	119522	21390.8	68472.2	275889	4167.49
A3	9	116516	19467.3	72552.1	271663	822.128
A4	9	108976	18145.4	68985.3	246385	113.964
A5	9	107527	17666.6	71379.2	247962	558.13
A6	9	88683.5	15813	72179.4	249346	0
A7	9	110018	22869.4	78545.6	251794	1234.36
A8	9	124022	21962.1	78394.4	264617	788.887
A9	9	119262	21430	78434.6	282471	2695.4
A10	9	120466	18673.6	68979.7	257051	391.248
A11	9	124463	20496.5	73262.5	302813	663.256
A12	9	128948	21636.4	61963.4	295700	1659.36
B1	9	115864	18438.4	59336.4	248498	551.927
B2	9	130462	20912.8	78780.7	305502	97.9222
B3	9	121017	20385.5	84104	294183	543.183
B4	9	125031	20570	85730.7	285959	699.895
B5	9	121409	20126	92038.7	302759	0
B6	9	100382	16397.9	77710.5	254831	0
B7	9	111685	17856.4	77325.9	253867	0
B8	9	116307	17768.8	80933.5	270633	0
B9	9	104556	16945.8	72229.5	254319	396.085
B10	9	95899.2	16280.6	71505.1	258180	209.108
B11	9	113675	17737	73050.1	297160	0
B12	9	99928.7	17049.2	64411.6	278394	0
C1	9	57266.4	13451.7	64290.1	269909	181.985
C2	9	116028	19170.1	82119.6	311420	622.882
C3	9	100726	18430.3	88545.8	308123	392.129
C4	9	110739	18926.2	93629.3	301832	769.868
C5	9	101208	17856.5	87024.5	276628	419.638
C6	9	93113	15995.9	83309.4	261889	0
C7	9	94488.3	16036.7	76260.9	238745	0
C8	9	107294	18799	87491.4	277011	0
C9	9	99749.8	17157.4	82849.1	271197	9.08153
C10	9	104815	16587.3	84700.8	294544	124.498
C11	9	105341	15776.2	78630.3	303379	448.866
C12	9	123422	18383.4	78787.7	338771	243.245
D1	9	94223.7	16094.1	71223.2	289601	1900.19
D2	9	87373.6	14704.7	72443.6	273408	0
D3	9	111815	18499.2	85131.2	291733	1370.49
D4	9	103135	17059.3	86979.2	286662	671.162
D5	9	91229.1	15445.1	81718.3	257220	0
D6	9	90887.2	14382.7	79348.3	248919	0
D7	9	81158.6	13081.3	71106.7	222873	0
D8	9	100562	16280.8	83642.3	267990	294.181
D9	9	96780.6	15477.1	80960.7	271998	0
D10	9	88711.9	14642.3	76977.6	272969	96.1765
D11	9	88553.5	13678.5	78209.8	307678	0
D12	9	125293	18212.3	86437.8	362929	468.492
E1	9	154561	30643.5	86930.2	326731	1093.15
E2	9	167448	28058.4	81206	297604	734.027
E3	9	137883	24734.8	84172.7	290253	541.54
E4	9	147088	24348.4	82711.7	266096	0
E5	9	143893	23459.7	86228.3	267534	642.665
E6	9	154901	24971.8	92295	283504	73.5382
E7	9	171549	28538.1	106883	317610	0
E8	9	146089	25525.6	88909.7	273425	342.741
E9	9	150260	27297.4	89259.3	290992	196.277
E10	9	132626	22902.5	75132.6	267981	469.456
E11	9	145554	24159.6	75497.6	289018	413.165
E12	9	130378	15857.5	65050	323985	0
F1	9	146184	26723.3	79893.9	333326	0
F2	9	151269	26555.5	85384.5	324288	743.672
F3	9	164041	27350.7	84090.1	287481	1653.5
F4	9	145242	26016.6	89668.4	292825	2339.65
F5	9	156914	25358	93373.8	298519	925.113
F6	9	154051	25302.8	98188.6	313796	0
F7	9	159364	26224.6	98339.5	315909	0
F8	9	167986	27895.1	98151.1	316608	1009.97
F9	9	147405	25244.6	92395.4	311641	0
F10	9	144923	25505.3	86893.6	312371	0
F11	9	121516	21149.1	66887.3	258974	0
F12	9	129911	24361.1	72527.9	313385	0
G1	9	105464	20565.6	71918.7	311203	0
G2	9	131145	21453.8	75918.1	296027	1106.77
G3	9	128449	23049.7	76454.1	279794	471.629
G4	9	127970	21683.8	85385.5	294363	564.072
G5	9	133360	21895.4	88862.1	295988	1385.97
G6	9	131968	21702.6	89474.2	293968	567.661
G7	9	152438	26445.5	101727	331536	1209.86
G8	9	149629	24365.9	98961.3	331292	0
G9	9	137495	23593.2	87666.2	300849	0
G10	9	132355	20715.2	80083.1	296743	245.334
G11	9	193327	29157.4	85955.2	337470	619.232
G12	9	122781	18592.4	63056.1	277781	1293.79
H1	9	120844	19336.1	64254.6	291036	2483.78
H2	9	117988	20239.6	72937.4	303910	826.543
H3	9	110644	19690.5	81727.3	321400	0
H4	9	127415	20902.6	83029.9	304886	830.404
H5	9	126128	20312.7	82122.4	290746	68.1505
H6	9	155265	25750.6	98039.6	343582	847.01
H7	9	136565	20261.6	77737.5	288651	0
H8	9	140164	22586.4	90792.9	322820	671.989
H9	9	132674	21372.2	87405.2	327761	0
H10	9	131135	20841.8	81601.5	317537	169.514
H11	9	152230	24155.5	86009.2	369621	858.552
H12	9	194468	30889.3	78937	358033	3148.62
A1	10	145598	25391.9	65378.1	295795	2103.41
A2	10	118516	20846.2	68579.8	275395	4063.33
A3	10	117759	19435.8	72864.3	272457	868.907
A4	10	109073	18339.6	69047.3	247472	352.427
A5	10	106999	17769.4	71578.3	248590	519.15
A6	10	88472.8	15623.9	72765.8	250107	0
A7	10	109328	23032	78716	252057	1196.26
A8	10	123296	22155.8	78538.4	264779	1178.07
A9	10	119334	21467.6	78788.8	282471	2826.17
A10	10	121183	18833.8	69122.6	257412	641.488
A11	10	124290	20552.5	73256.9	302539	357.764
A12	10	129402	21345.3	62367	295663	621.593
B1	10	116045	18428.6	59447.5	248700	134.616
B2	10	130821	20586.4	79216.4	306278	208.667
B3	10	120812	20081	84046.2	294265	381.893
B4	10	125912	20722.3	85882.7	286395	553.83
B5	10	121834	20011.1	92713.8	302350	0
B6	10	101261	16504.4	77643.8	255383	0
B7	10	113000	17884.6	77187.3	254339	0
B8	10	117221	17846.5	80773.1	271055	0
B9	10	105106	16898.6	72466.4	254065	663.849
B10	10	95503.3	16081.9	71269.2	258583	318.414
B11	10	115034	17319.4	72835.5	296922	0
B12	10	99818.4	16931	64529.5	278939	0
C1	10	57302.6	13230.2	64660.9	270067	217.732
C2	10	116917	19502.7	82184.9	312312	329.583
C3	10	100356	18300.7	88517.6	308280	601.264
C4	10	111691	18990.6	93833.9	301998	748.182
C5	10	101922	17399.3	87065.7	276859	710.3
C6	10	93000.5	16289.7	83123.3	262031	0
C7	10	94232.2	16148.7	76468.2	238741	0
C8	10	107462	18702	87777.5	276883	0
C9	10	99875.1	16816.1	83123.8	271051	0
C10	10	106049	16690.7	84995.5	294525	442.552
C11	10	104689	16416.1	78887.2	303692	902.164
C12	10	122444	18496.3	79332.4	339594	451.931
D1	10	94683	15760.8	71363.3	290116	2229.23
D2	10	86953.6	14614.5	72312	273882	62.3783
D3	10	112588	18489.1	85323.7	292461	1348.41
D4	10	104492	16938.2	87030.1	285761	1231.11
D5	10	91673.2	15536.9	81997.7	257415	0
D6	10	91070.9	14427.9	79282.5	248842	0
D7	10	81236.4	13294.7	71284.3	222959	0
D8	10	100905	16235.2	83962.1	268606	0
D9	10	96647.6	15455.1	81195.5	270289	0
D10	10	88918.7	14623.5	76974.9	272963	0
D11	10	89148.7	13716	78327	307724	0
D12	10	123807	18220.7	86498.4	361889	463.24
E1	10	155151	30613.3	87282.9	326971	1115.95
E2	10	167455	27806.2	81332	297311	846.052
E3	10	138380	24771.4	84620.7	290317	321.269
E4	10	146203	23918.7	82809.5	265854	0
E5	10	143139	23751.9	86496.7	267782	273.746
E6	10	153972	24973.7	92425.7	283647	305.084
E7	10	170856	28333.9	107153	317253	0
E8	10	145419	25235.2	88966.3	272940	295.761
E9	10	150959	27380.8	89784.4	290645	0
E10	10	131942	22672.2	75304.8	267997	162.811
E11	10	145453	23706.3	75834.8	288809	89.2181
E12	10	130429	16243.4	65117.7	323895	0
F1	10	145463	26396.4	79968.7	334205	0
F2	10	151567	26625.5	85239.4	324486	768.536
F3	10	163829	27420.6	84410.8	287800	980.461
F4	10	145655	26393.9	89551	292751	2334.76
F5	10	157667	25575.2	93365.1	298361	944.227
F6	10	153819	25441	97956.4	313003	42.8179
F7	10	159301	26192.4	98522.8	316107	39.6916
F8	10	167913	27971.8	98783.2	316151	672.599
F9	10	147138	25274.8	92383.4	311416	0
F10	10	144529	25235.2	86933.9	312781	0
F11	10	121933	21472.5	67107.5	259383	0
F12	10	130490	24241.7	72329.5	313021	0
G1	10	104852	20478	71865.6	311550	0
G2	10	131273	21648.1	75986.5	296899	1128.43
G3	10	128663	23807.2	76806.4	280056	358.931
G4	10	127618	21691	85276	294066	118.705
G5	10	133754	21896.3	88948.5	296209	1027.02
G6	10	132061	21826.4	89480.7	294132	486.437
G7	10	152574	26610.4	102093	330865	1481.21
G8	10	149792	24707.7	98604.8	331178	0
G9	10	138487	23564.6	87586.7	300264	0
G10	10	133523	20696.9	79980.1	296533	20.2667
G11	10	193938	29327.1	85836.7	338140	964.548
G12	10	123625	18554.5	62936.6	278522	1418.14
H1	10	120849	19780.3	64653.8	290555	2622.79
H2	10	118625	19942.7	72881.1	303968	666.819
H3	10	110335	20129.1	81918.9	321427	0
H4	10	128607	20522.5	83181.3	304914	775.772
H5	10	126566	20371.7	82287.6	290535	0
H6	10	155833	26186.1	98068.6	342910	871.589
H7	10	136753	20909.2	77746.2	288995	0
H8	10	140417	22686.9	90987.4	323049	471.745
H9	10	133111	21208.3	87578.5	328141	0
H10	10	131035	20671	81612.8	317758	240.239
H11	10	151785	24137	86265.9	369190	912.997
H12	10	194607	31649.6	78599.1	358760	2292.67
A1	11	146175	25136.2	66011.4	295832	1560.45
A2	11	119750	21047.6	68793.8	275975	4107.97
A3	11	117089	19652.5	73220.6	272838	873.884
A4	11	108955	18212	69038.9	247148	154.187
A5	11	107684	17702.6	71604.6	248464	377.402
A6	11	88404.7	15686.7	72695.2	249972	232.111
A7	11	110862	23521.2	79738.1	252600	1129.98
A8	11	123535	22019.3	78963.6	264806	731.912
A9	11	119147	21582.4	78575.1	281594	2797.78
A10	11	120722	18773	68878.6	257557	1036.71
A11	11	125031	20321.6	73241.2	303265	620.278
A12	11	128432	21839.6	62396.1	296059	1071.11
B1	11	116281	18155.2	59491.7	248709	434.914
B2	11	130740	20413	78962.1	305902	277.446
B3	11	120735	19983.6	84555.4	294956	56.1913
B4	11	124818	20686.9	85950.1	286440	576.145
B5	11	121877	20123.1	92706.6	302649	0
B6	11	101407	16713.3	77847.4	255688	0
B7	11	113051	17789.1	77519.5	254485	0
B8	11	116920	18071.4	80985.2	271558	0
B9	11	105241	16833.4	72400.4	254426	558.625
B10	11	95793.4	16205.9	71272.9	258775	0
B11	11	114173	17618.1	73053.4	297703	0
B12	11	100099	16829.4	64914.8	278972	0
C1	11	57122.2	13156.9	64223.9	269849	296.538
C2	11	115922	19293.4	82047.3	312649	813.375
C3	11	102038	18393.8	88869.4	308669	24.2055
C4	11	111222	18705.1	93754.8	302588	1032.08
C5	11	101888	17582.9	87203.1	277803	322.439
C6	11	94106.1	16026.8	83455.7	262033	0
C7	11	93970.7	16237.2	76803.3	239291	0
C8	11	108127	18617	87787	276974	0
C9	11	100191	17177.6	82951.5	272223	133.498
C10	11	105431	16817.5	85422.3	295841	140.06
C11	11	105421	15967.3	79034.2	304202	719.293
C12	11	122896	18263.9	79042.8	339248	663.276
D1	11	94934.6	16292.8	71273.2	290100	1968.9
D2	11	87737.2	14730.4	72481.7	273973	30.7619
D3	11	111614	18310.7	85050.1	292267	1551.68
D4	11	103241	16901.7	86959.5	286324	732.62
D5	11	92623.7	15718.6	81687.6	257880	0
D6	11	91454.2	14492.3	79416.7	248952	0
D7	11	81319.4	13207.4	71414.4	222773	0
D8	11	101337	16165.4	83829.4	268464	407.481
D9	11	96902.8	15572.4	81317.8	271901	0
D10	11	88811	14895.8	77084.3	273308	400.278
D11	11	89009.8	14151.7	78236	308447	0
D12	11	125191	18154	86216.9	363629	705.889
E1	11	154417	30439.2	87229.8	326770	884.211
E2	11	168960	28166.4	81252.3	297010	836.45
E3	11	139471	24702	84580.8	290405	501.141
E4	11	146790	23825.2	82817.8	265954	344.282
E5	11	143899	23496.4	86749.2	267001	143.251
E6	11	154314	24852.3	92722.4	282898	339.866
E7	11	171299	28631.5	107286	316754	0
E8	11	145892	25171.5	89088.2	273282	0
E9	11	150748	27341.8	89916.5	291456	123.219
E10	11	131758	22625.7	75671.9	268630	413.521
E11	11	145620	23784.5	75582.2	289239	43.5469
E12	11	130552	15719.7	65019.9	323826	0
F1	11	146770	26498.4	79924.6	334016	0
F2	11	151802	26724.6	85480.9	325525	517.632
F3	11	165190	27204	84230.8	288132	1100.72
F4	11	145464	26186	89718.6	292827	2015.76
F5	11	158205	25282.1	93524.4	299243	753.088
F6	11	154057	25193.4	98316.3	313209	0
F7	11	159841	26316.6	98137.7	315826	90.0321
F8	11	168659	27552.5	98508.6	316613	701.609
F9	11	146832	25369.9	92422.8	312186	0
F10	11	145719	25272	87070	313292	0
F11	11	121157	21131.2	66883.1	259771	0
F12	11	131581	24371.7	72381.3	313508	36.9425
G1	11	105380	20458.6	71942	311528	0
G2	11	131058	21410	75653.4	297090	1138.18
G3	11	129358	23410.5	76490.5	280525	949.888
G4	11	127989	21487.4	85595.2	295543	293.639
G5	11	133059	21660.8	88976.3	295843	1209.21
G6	11	131974	21644.4	89515.9	294221	146.935
G7	11	152630	26789.7	102379	331835	1112.61
G8	11	150153	24746.4	98915.9	331860	0
G9	11	138151	23661.2	87764.6	300028	0
G10	11	133232	20869.1	79994.1	297466	45.8668
G11	11	194106	29264.8	86021.5	338460	1006.09
G12	11	121874	18659.7	62961.8	278819	1612.6
H1	11	122244	19886.6	64609.3	290666	2017.09
H2	11	119431	20126.3	72927.3	304037	1109.13
H3	11	110754	19844	82064.1	321278	0
H4	11	128496	20754.8	82932.6	304355	814.925
H5	11	126729	20290.3	82234.5	290599	130.622
H6	11	155400	25990	97860.5	343342	864.971
H7	11	137219	20815	77616.8	289019	0
H8	11	140817	22563.6	90827.8	323443	254.364
H9	11	133021	21348.1	87238.7	327644	0
H10	11	131839	20686	81518.4	317824	680.302
H11	11	152272	24457	86140.3	368612	318.293
H12	11	194947	32241.1	78945.3	358448	3180.7
A1	12	147524	25302.2	66018.8	295933	1450.37
A2	12	119265	21201.1	68894.7	276931	3944.29
A3	12	118170	19594.4	72847.7	272813	1076.93
A4	12	108967	18277.6	69079.3	247412	87.1491
A5	12	108294	17574.9	71583.6	248926	548.385
A6	12	88683.5	15804	72843	250472	0
A7	12	110772	24160.2	80224.9	252601	1352
A8	12	124728	22226.5	79242.1	265369	873.035
A9	12	119299	21506.2	78801.7	282595	2259.51
A10	12	121279	18959.3	69016.7	257583	500.48
A11	12	124742	20170.8	73425.7	303546	795.675
A12	12	129642	21907.3	62502.4	295812	1019.09
B1	12	116562	18252.9	59389.9	248879	316.866
B2	12	130886	20652.1	79065	305686	108.414
B3	12	121164	20069.8	84108.1	295262	691.986
B4	12	125803	20913.8	86498.5	287394	683.665
B5	12	123581	19725.7	92703.5	303435	0
B6	12	101089	16364	77929.9	255379	0
B7	12	112743	18040.8	77566	254515	0
B8	12	116509	18047.9	81120.3	271193	0
B9	12	105215	16722.7	72782	254104	219.857
B10	12	95828.6	15880.4	71560.2	259077	422.017
B11	12	115194	17351	73533.8	298274	0
B12	12	100433	16910.9	64750.4	279014	0
C1	12	57576.9	13245.7	64616.8	270367	178.735
C2	12	117614	19444.7	82607	312183	921.221
C3	12	102209	18304.5	88738.2	308803	405.684
C4	12	111763	18837.7	94018.7	302124	796.484
C5	12	102422	17697.4	87210.6	277715	206.548
C6	12	93149.5	16148.7	83685.8	262782	0
C7	12	94772.8	16259.9	77236.4	239715	0
C8	12	107835	18857.2	88031	277301	0
C9	12	100026	17283.8	83299.7	271708	227.946
C10	12	105198	16810	85316.3	295269	196.473
C11	12	105107	16084.3	78977.6	304016	412.291
C12	12	122592	18397.8	79318.3	339141	552.951
D1	12	95667.4	16179.3	71409.4	290412	2297.94
D2	12	88600.6	14354.5	72860	273575	0
D3	12	112651	18390.3	85477.5	292286	1064.2
D4	12	103558	16916.1	87115.5	286938	1025.28
D5	12	92636.3	15358.8	82039.7	256992	0
D6	12	91899.2	14325.3	79483.4	249405	0
D7	12	81748.1	13184.8	71189.3	223435	0
D8	12	101582	16138.2	84310.6	268740	0
D9	12	97052.8	15491.4	81542.9	271771	0
D10	12	88950.6	14604.7	77298.5	273544	8.2437
D11	12	88269.6	13623.8	78321.9	308493	0
D12	12	124491	18424.2	86420.3	363392	196.43
E1	12	156163	30545.5	87204.3	327419	909.854
E2	12	168743	28246.8	81414.9	297787	374.482
E3	12	139491	24748.3	84414.7	290952	810.867
E4	12	147107	23881.5	83249.1	266062	0
E5	12	143973	23588	86896.4	267011	368.919
E6	12	155158	24664.8	92445.8	283842	0
E7	12	172012	28436	107158	317671	0
E8	12	146192	25501.6	89304.2	274820	114.247
E9	12	149953	27309.3	89512.7	291318	0
E10	12	132261	22377.7	75487.9	268005	484.439
E11	12	144636	23620.6	75853.6	288878	22.3045
E12	12	130385	15777.7	65074.5	323967	0
F1	12	147155	26493.2	80321.6	334321	0
F2	12	151913	26386.3	85863.1	324699	478.075
F3	12	165076	27780.9	84469.8	288188	1438.2
F4	12	145372	26173.1	89628.3	292199	2285.83
F5	12	158440	25640.7	93712	299035	643.183
F6	12	154898	25362.1	97818.6	312950	0
F7	12	159465	26108.9	98865	316125	43.5639
F8	12	168326	27839.4	98618.5	316362	284.727
F9	12	147493	25233.8	92314.4	312534	0
F10	12	144281	25275.3	87249.6	313075	0
F11	12	121926	21197.5	67259.5	260254	0
F12	12	131164	24014.7	72200.5	313810	3.35841
G1	12	106698	20265.5	71866.9	311841	0
G2	12	132938	21592	76306.5	297979	1154.42
G3	12	129831	23407.6	76865.7	280571	338.096
G4	12	127989	21281.2	86003.8	296074	324.877
G5	12	134589	21968.4	89117.4	297180	1105.88
G6	12	132042	21764.5	89915.5	293980	692.693
G7	12	153060	26760.8	102605	331570	1125.25
G8	12	149556	24534.7	99372.9	332065	51.457
G9	12	138769	23753.9	88248.5	301054	0
G10	12	134256	20872.3	80364	297366	0
G11	12	196410	29271.5	86151.7	337907	390.752
G12	12	122557	18621.9	63330.9	278380	1365.22
H1	12	122318	19426.6	64208.7	290797	2227.03
H2	12	120628	20081	73085	305109	763.994
H3	12	111011	19605.5	82055	321770	180.706
H4	12	129557	20954.8	83382.4	305202	787.609
H5	12	127133	20065	82343.2	290528	51.1129
H6	12	156432	26035.1	98205.1	343824	953.832
H7	12	137533	20770.9	77942.2	289182	0
H8	12	141715	22519.8	91033.3	323640	501.511
H9	12	134151	21239.1	87579.5	328346	0
H10	12	131688	21085.4	81610.6	318439	0
H11	12	151490	24248.4	86243.8	369494	8.37612
H12	12	194468	31944.4	78920.5	359115	2262.28
A1	13	148820	25343.7	65691	296577	1679.46
A2	13	120558	21177.6	68899.1	276356	4254.48
A3	13	117419	19423	73019	273361	739.517
A4	13	109116	18177.3	69012.6	247987	103.43
A5	13	106835	17717.1	72060.7	248515	818.591
A6	13	88217	15946.7	72829.6	250788	0
A7	13	110682	24283.7	80448.1	252950	1344.55
A8	13	123826	22690.6	79478.4	266373	611.826
A9	13	119769	21743.5	78970.9	283148	2631.54
A10	13	121480	18973.8	69484.2	257946	700.076
A11	13	125302	20382.2	73469.6	303580	772.444
A12	13	130582	21728.5	62618.8	296178	1196.5
B1	13	116149	18082.5	59532.9	248387	333.434
B2	13	130547	20739.4	79002.6	306604	117.74
B3	13	121234	20040	84174	295351	449.531
B4	13	126749	20791	86356.6	286911	944.351
B5	13	122147	20036.8	92816.5	303402	0
B6	13	101184	16448.6	78111.5	255872	0
B7	13	113410	18168	77483.3	254490	0
B8	13	117053	17707.4	80999.2	271556	0
B9	13	105580	16949.9	72967.3	255194	332.78
B10	13	95800	16186.7	71598.4	259401	304.156
B11	13	114294	17723.9	73512	297843	0
B12	13	100914	17076.3	64750.4	278882	0
C1	13	57466.3	13419.8	64821.8	270691	100.742
C2	13	116690	19205.3	82675.3	312990	289.267
C3	13	102092	18444.7	88806.3	308677	366.955
C4	13	112066	19062.7	94378.5	302636	379.513
C5	13	102892	17807.4	87473.4	278073	407.488
C6	13	93546.4	16042.6	83644.3	263257	0
C7	13	95000.4	16238	76983.3	239597	0
C8	13	108408	18878.4	88059.7	277385	0
C9	13	99437.4	17451.4	83225.3	271904	360.537
C10	13	106088	16795	85023.5	294751	201.337
C11	13	105329	15854.5	78880.7	303712	422.266
C12	13	123232	18193	79169.6	339846	437.31
D1	13	95165.9	15962.7	71468.7	290458	2146.78
D2	13	87469.9	14580.9	72751.7	274211	0
D3	13	112815	18490.9	85822	292262	1559.96
D4	13	103797	16870.9	86860.5	286613	751.155
D5	13	92944.4	15455.1	81967.9	257800	88.7685
D6	13	91107	14628.8	79485.2	249563	0
D7	13	81673.3	13295.5	71318.5	223114	0
D8	13	101381	16332.1	84437.4	269139	0
D9	13	97571.1	15460.9	81540	271688	0
D10	13	88830	14543.7	77145.7	273748	0
D11	13	88977.2	13664.4	78467.4	308452	0
D12	13	124738	18252.5	86345.3	363061	383.407
E1	13	155927	30279.8	87369.3	327651	1080.81
E2	13	168026	27936.2	81510.8	298088	834.316
E3	13	139768	24694.3	84479.8	290708	449.199
E4	13	147274	24169.3	83198.7	266544	2.03116
E5	13	144196	23616.9	87089.2	267451	568.096
E6	13	154335	24747.3	92616.8	283879	43.7254
E7	13	171012	28464.2	107755	318120	0
E8	13	145613	25236.2	89279.6	274488	0
E9	13	151425	27361.3	89831	291793	0
E10	13	132793	22998.3	75388	267875	0
E11	13	145409	23598.1	75739.8	289148	373.866
E12	13	131162	15912.6	65442.9	324089	0
F1	13	146959	26480.1	79818	334588	0
F2	13	151742	26735.1	85601.1	324999	597.876
F3	13	164985	27094.8	84562.2	288273	1219.03
F4	13	145566	26237.5	89404.5	292587	2352.37
F5	13	158630	25447.1	93850	299474	463.512
F6	13	154523	25378.2	98098	313545	80.1698
F7	13	159980	26169.6	98613.4	315865	3.87235
F8	13	168121	27639.7	98591.5	316619	843.435
F9	13	146653	24928.2	92427.1	312037	0
F10	13	144648	25176.6	87156	313460	0
F11	13	121384	21036.3	67358.8	260237	0
F12	13	131277	24050.2	72465.1	314415	71.6461
G1	13	106869	20339.1	71992.4	311986	0
G2	13	132190	21668.4	76057	297679	1133.85
G3	13	129898	23416.3	76799.7	280550	476.365
G4	13	128381	21380.7	86249.1	296704	437.334
G5	13	133888	21946.5	89140.6	296761	1443.08
G6	13	132507	21683.5	89843.2	294929	438.067
G7	13	153653	27066.4	102670	332007	994.929
G8	13	150054	24925.9	99038	331867	97.5538
G9	13	139372	23752.9	88231.6	300698	0
G10	13	135218	20917.5	80371.5	297522	0
G11	13	197106	29478.3	85862.7	338395	959.355
G12	13	123193	18861.7	63409.2	278854	1273.94
H1	13	122932	19994.4	64572	290245	2168.87
H2	13	121296	20255.1	73213.5	305319	877.923
H3	13	111913	19912.4	82188.1	322193	0
H4	13	129856	20732	83484.3	305256	569.082
H5	13	127656	20587.9	82454.3	291402	0
H6	13	157987	26005.3	98409.4	343679	1097.52
H7	13	137484	20779.5	77866.1	289235	72.0165
H8	13	141744	22648.6	91080	324466	552.023
H9	13	134259	21261.3	87565.9	328266	0
H10	13	132003	20559	81785.8	317857	171.759
H11	13	151444	24191.3	86459.1	370512	865.532
H12	13	194100	31836.1	78925.5	360038	3033.82
A1	14	149221	24830.7	65742.7	297288	1957.63
A2	14	121064	21463.4	68936.8	276358	4154.9
A3	14	117903	19694.9	73145.2	273860	804.212
A4	14	110342	18362.1	69482.7	247856	112.049
A5	14	108729	17544	72000.2	249341	546.613
A6	14	89105.8	15865.2	73106.8	250468	0
A7	14	111340	24584.9	80502.4	253566	1248.45
A8	14	124654	22753.8	79898.4	266027	1027.31
A9	14	119781	21781.1	78946.1	282938	2634.58
A10	14	122008	19010.5	69496.9	257834	617.656
A11	14	126010	20523.9	73545	303700	620.278
A12	14	130363	22057.6	62243	296366	1051.11
B1	14	115197	18092.3	59591.5	248487	366.571
B2	14	130935	20548.1	78803.8	305810	264.623
B3	14	121631	20160	84411.1	295196	0
B4	14	127366	21006.2	86365.7	288213	653.235
B5	14	123201	20113.1	92989.2	304102	4.11228
B6	14	101693	16529.8	78064.1	256307	0
B7	14	113638	17950.3	77737.2	254374	0
B8	14	117530	18052.4	81565.2	272007	0
B9	14	105799	16894.5	73107.8	255119	684.38
B10	14	95758.1	16004.4	71528.5	258954	326.968
B11	14	115579	17404.4	73319.2	298079	0
B12	14	101157	16788	64778.8	278818	0
C1	14	57934.3	13078.4	64861.8	270818	494.771
C2	14	118139	19275.8	82640.1	313014	778.099
C3	14	101800	18082.7	89153.2	309480	470.554
C4	14	111375	18956	94314.2	303512	895.058
C5	14	102551	17631.1	87566.9	278199	468.237
C6	14	93512.2	16421.9	83877.6	263347	0
C7	14	95467.2	16357.1	77166.5	239561	0
C8	14	108117	18763.9	88058.7	277841	0
C9	14	100612	17283.8	83890.8	272229	0
C10	14	106120	16857.9	85430	295390	258.723
C11	14	105162	15979.1	79045.1	303345	260.453
C12	14	123387	18324.3	79473.4	339891	810.818
D1	14	95268.1	15924.6	71844.3	290322	2172.74
D2	14	87682.5	14686.1	72612.4	273880	88.8677
D3	14	112884	18509.2	85510.7	292298	1336.45
D4	14	104702	16998.7	87380.2	287355	974.55
D5	14	93111.5	15661.3	82180.3	257731	0
D6	14	91463	14266.1	79509.5	249221	0
D7	14	82451.4	13403.8	71506.2	223272	0
D8	14	101662	16328.3	84464.1	268279	0
D9	14	97192	15771.6	81703.9	272105	0
D10	14	88772.2	14800	77526.4	274365	130.067
D11	14	88458.8	14174	78847.3	309368	0
D12	14	124313	18429.5	86731.6	363107	628.157
E1	14	156170	30440.3	87501.9	327434	739.85
E2	14	169289	28114.6	81424.6	298396	323.271
E3	14	139879	24394.5	85038.5	291160	308.764
E4	14	147167	23831.2	83628	266121	0
E5	14	143932	23352.7	86927.2	267686	439.563
E6	14	153979	24566.6	92763.7	283744	341.853
E7	14	171962	28488.1	107810	318211	0
E8	14	145524	25265.5	89449.5	274396	5.33865
E9	14	150918	27216.2	89780.1	292038	0
E10	14	132307	22415.2	75492.8	268543	0
E11	14	145437	23830.6	75758.6	289504	289.959
E12	14	130396	16051.4	65338.6	324095	0
F1	14	147117	26559.8	80378	334086	0
F2	14	152377	26714.1	85786	325501	844.259
F3	14	165422	27200.1	84397	287765	1233.58
F4	14	145622	26198.8	89816.9	292880	2186.02
F5	14	158229	25398.8	93861.6	298919	929.891
F6	14	154830	25205	98390.3	313942	0
F7	14	158860	26266.4	98764.6	315408	151.022
F8	14	168722	27559.9	98627.1	315802	809.053
F9	14	146289	25026.5	92403.1	312286	0
F10	14	144567	24807.7	87195.2	313635	0
F11	14	122233	21366.1	67268.9	260069	0
F12	14	131059	24246.4	72703.2	313612	263.075
G1	14	108416	20694.8	72238.3	311536	0
G2	14	132967	21693.1	76445.4	297846	1236.73
G3	14	129831	23204.9	77014.1	280402	290.743
G4	14	128017	21425.9	86127.8	296251	175.826
G5	14	134520	21647.1	89497.1	296597	915.523
G6	14	132161	21499.6	89773.6	294849	329.463
G7	14	153473	27311.3	102965	332486	983.258
G8	14	151160	24818.4	99142.8	331478	0
G9	14	139937	23759.8	88379.6	300767	0
G10	14	136890	21122	80164.6	297317	0
G11	14	199285	30020.6	86074.9	339533	876.271
G12	14	124774	18951.4	62919.3	278637	1178.7
H1	14	126321	20381.5	64810.4	290693	2334.83
H2	14	124277	20635.5	72962.2	304913	1315.77
H3	14	111445	19660.5	82475.4	322255	0
H4	14	131140	20912.1	83646	305072	597.308
H5	14	129260	20538	82535.7	291458	252.319
H6	14	159938	26493.7	98390	344280	1066.33
H7	14	138496	20864.3	78075.1	289471	0
H8	14	142188	22836.7	91086.5	322894	735.129
H9	14	135202	21742.6	87834	328523	0
H10	14	131345	20979.2	82031.5	318589	162.778
H11	14	152193	24758.5	86775.2	369854	393.678
H12	14	195426	32212.7	79428.2	358775	2890.32
A1	15	148812	25357	66114.7	296756	2064.73
A2	15	122423	21108.5	69269.4	276377	3789.77
A3	15	119006	19666.3	73196.1	273964	603.159
A4	15	109504	18247.6	69513.8	247756	496.079
A5	15	108503	18191.9	72016	249554	558.13
A6	15	89402.1	15960.5	73326.9	251037	0
A7	15	111237	25026.3	80764.4	253300	1030.57
A8	15	125500	22947.5	79978.6	266431	779.245
A9	15	120404	21920	79238	284053	2636.61
A10	15	122509	18990.2	69552.3	257962	880.805
A11	15	126044	20360.5	73554	303886	750.374
A12	15	130805	21984.5	62683.3	296405	1219.18
B1	15	118662	18527.3	60082.2	249400	849.118
B2	15	130163	20592.4	78872	305962	204.005
B3	15	121140	20144.6	84672.9	295513	441.206
B4	15	126780	21018.9	86559.9	287407	642.077
B5	15	122850	20029.9	92855.6	304063	0
B6	15	101089	16379.3	78244.9	255757	0
B7	15	113683	17723.4	77968.7	254931	0
B8	15	118220	17886.2	81553.9	272282	0
B9	15	106106	16765.9	73040.1	255130	282.307
B10	15	95468	16193.1	71912.7	259370	260.434
B11	15	114939	17674.8	73499	298663	0
B12	15	101410	17146.1	64701.7	279301	0
C1	15	58346.5	13356.9	64834.9	270770	374.531
C2	15	118480	19293.4	82739.6	313213	660.174
C3	15	103674	18390.9	89190.2	308746	345.654
C4	15	112160	19170.4	94404.2	303083	630.878
C5	15	102203	17616.5	87675.4	278219	165.425
C6	15	93900.8	16233.4	83896.3	263641	0
C7	15	95537.9	16516.9	77211.5	240007	36.5781
C8	15	107665	19121.4	88304.6	277678	0
C9	15	100525	17339.1	84114.8	272336	157.11
C10	15	107157	16766.8	85369.3	296065	142.006
C11	15	105826	15958.7	79414.1	304560	79.7983
C12	15	124444	18577.7	79320.9	340019	1062.04
D1	15	95298.1	16132.2	71729.6	290595	2134.56
D2	15	88472.2	14672	72631.4	274207	85.4497
D3	15	113084	18485.4	85601	292673	1222.4
D4	15	105244	16936.3	87525.3	287209	611.655
D5	15	93248.4	15554.1	81905.5	257807	0
D6	15	92275.3	14354.8	79587.8	249313	0
D7	15	82636.9	13263.2	71667.9	223732	0
D8	15	103054	16593.9	84338.4	269228	119.263
D9	15	97498.4	15646.8	81440	271832	0
D10	15	89757.9	14520.5	77338.3	274013	225.328
D11	15	88670.7	14245.9	78679.6	308898	0
D12	15	124447	17907.1	86492.2	363913	438.029
E1	15	156037	30353.8	87319.2	327851	1107.4
E2	15	170746	27903.1	81709	298794	595.33
E3	15	140299	24785.9	84934.6	291411	128.892
E4	15	147220	23897.6	83399.4	265803	244.755
E5	15	144950	23267.8	87449.1	268703	0
E6	15	153989	24706.5	93048.3	283699	343.841
E7	15	172095	28363.2	107628	316875	0
E8	15	145802	25151.6	89647.3	274521	121.721
E9	15	151540	27421.9	90384.2	292014	0
E10	15	131921	22639.6	75658.2	268605	267.69
E11	15	146253	23531.7	75727.3	289187	213.486
E12	15	131405	15538.5	65328.2	324323	0
F1	15	147502	26603	80403.7	334649	0
F2	15	152339	26714.1	85547.8	325188	640.823
F3	15	165105	27264.1	84736.3	288557	1020.22
F4	15	146462	26249.3	89852	293074	2301.49
F5	15	158031	25516.4	93612.9	299282	574.373
F6	15	155005	25538.8	98394.9	313483	0
F7	15	159399	25719.1	98755.8	314988	48.4044
F8	15	169021	27555.6	98707.9	316580	409.362
F9	15	146671	24972.5	92628.5	312065	0
F10	15	145077	25025.8	87275.8	313509	0
F11	15	121717	21265	67391.9	260539	0
F12	15	131064	24305.5	72859.8	314586	78.3629
G1	15	108577	20803.1	72127	312641	0
G2	15	132963	21725.7	76111.2	297683	1282.21
G3	15	130600	23525.9	77053.3	281005	214.033
G4	15	128218	21395.2	86275.5	296341	759.534
G5	15	134135	22061.5	89345.8	297080	1060.56
G6	15	132258	21585.2	89769	293984	428.94
G7	15	154645	27068.4	102704	331850	1148.59
G8	15	151700	25024.8	99536	332675	27.8725
G9	15	140830	24125.4	88558.5	301246	0
G10	15	140393	21337.2	80466.9	297571	0
G11	15	201367	29954.3	86084	338254	916.515
G12	15	126749	18710.2	63126.4	278673	1685.36
H1	15	129810	20705.1	64999.9	290624	2526.33
H2	15	128185	20872.8	73165	306115	760.643
H3	15	114771	20101.2	82188.1	322110	236.005
H4	15	134118	21289.3	83603.9	306049	696.556
H5	15	131384	20613.6	82411.2	290915	0
H6	15	163509	26229.3	98417.2	343204	871.589
H7	15	139927	20724.2	77848.6	289325	0
H8	15	144368	22788.3	90890.1	323925	578.181
H9	15	136527	21722.3	87907.6	327892	0
H10	15	131357	20722.9	81790.3	318711	304.227
H11	15	151936	24215.5	85849.1	370349	910.205
H12	15	194947	32171.8	79260.1	359162	3055.77
A1	16	150310	25760.5	66554.6	296699	2049.86
A2	16	122902	21455.2	68546.5	277504	4516.59
A3	16	119868	19660.4	73628.7	274044	700.7
A4	16	110565	18396.8	69595.6	247850	228.886
A5	16	108291	18104.5	72289.6	249591	986.03
A6	16	89156.4	15804.8	73146.3	251004	0
A7	16	111230	25016	81499.8	253933	1106.79
A8	16	125215	22963.5	80226.2	266483	628.48
A9	16	119625	21896.9	79352.8	283173	2411.57
A10	16	122444	19128.3	69817.6	257600	660.356
A11	16	127018	20485	73561.9	303775	501.798
A12	16	132133	22042.7	62402.4	297691	1424.59
B1	16	118862	18616.3	59959.8	249541	346.896
B2	16	130921	20624.6	78982.9	306374	160.872
B3	16	120873	19902.7	84705.8	295282	56.1913
B4	16	127614	20843.1	86894	288145	1006.23
B5	16	123162	19784.2	93070.3	304155	8.22456
B6	16	101663	16210.1	78307.2	256405	0
B7	16	113540	18019.2	77752.7	254457	0
B8	16	118620	17814.9	81544.5	271859	0
B9	16	105604	16930.3	72913.1	254709	373.843
B10	16	96269.4	16230.5	71712.2	259313	27.5642
B11	16	114991	17629	73355.2	298138	0
B12	16	100479	17121.2	64990.7	280030	0
C1	16	58837.4	13849.2	64928	271094	305.474
C2	16	117849	19676.8	83013	313603	526.124
C3	16	103660	18607	89456.5	309466	187.834
C4	16	112299	19262.8	94438.8	303342	778.74
C5	16	102286	17606.5	88053.1	278434	0
C6	16	94680.2	16305.5	84045.9	263522	0
C7	16	95333.4	16589.7	77543.3	240481	0
C8	16	108894	18787	88767.6	277963	0
C9	16	100519	17426.8	84037.7	272827	0
C10	16	107055	16983.9	85641	295572	52.5226
C11	16	106335	15835.2	79227.9	304008	489.873
C12	16	124300	18321.7	79417	340199	798.855
D1	16	95174.8	16093.3	71467.9	291283	1860.49
D2	16	88427.1	14516.3	72793.3	274294	0
D3	16	113347	18448.8	85743.7	292715	879.318
D4	16	104649	16836.3	87736.1	287538	528.735
D5	16	93009.1	15662.2	82149.6	258071	112.562
D6	16	92091.7	14324.4	79579.7	249963	0
D7	16	82274.1	13499.9	71582	223877	0
D8	16	102521	16485.3	84314.6	269228	0
D9	16	97654.7	15602	81710.7	272302	0
D10	16	89240.9	14651.3	77425.1	273903	0
D11	16	88484.5	13661.3	78813	308981	0
D12	16	123885	18159.3	86606.3	364073	168.069
E1	16	156422	30311.1	87322.2	328251	942.145
E2	16	168855	27992.3	82004	298681	609.2
E3	16	140285	24783	84820.9	291562	739.687
E4	16	147502	23768.8	83701.1	266629	656.065
E5	16	144503	23424	87491.9	269506	0
E6	16	154836	24881.4	93017.1	283690	0
E7	16	171132	28596.7	107877	318084	0
E8	16	145949	25342.8	89496.6	274537	125.992
E9	16	151362	27682.8	90585.6	291564	0
E10	16	132390	22774	75607.3	268349	448.48
E11	16	145753	23545.6	76087.5	289658	167.815
E12	16	131130	15815.2	65430.7	324533	0
F1	16	147650	26374.2	80420.9	335190	0
F2	16	151482	26574.1	85432.2	325841	996.836
F3	16	166247	27326.1	84536.7	288759	1147.27
F4	16	145894	26402.9	89795.8	293670	2288.77
F5	16	158426	25262.2	93940.3	299495	613.556
F6	16	155012	25371.9	98329.3	314011	0
F7	16	159558	26149.7	98702.2	315535	0
F8	16	168315	27868.8	98883.4	316432	278.28
F9	16	145667	24867.7	92267.4	311373	0
F10	16	144327	24888	87496.7	313430	0
F11	16	122089	21042.6	67346.4	260395	0
F12	16	131416	24221.6	72980	314138	0
G1	16	112612	21197.7	72720.9	312129	0
G2	16	135235	21825.7	76451.9	298446	1067.79
G3	16	132857	23457.1	77130.9	280778	441.324
G4	16	129000	21399.7	86458.8	296836	334.695
G5	16	135055	21821.5	89257.6	297318	966.284
G6	16	132822	21640.7	89732.9	294414	543.933
G7	16	156939	27299.8	102937	332721	1387.84
G8	16	154106	25062.5	99664.6	332866	0
G9	16	143262	24414.2	88874.5	302378	0
G10	16	146302	21560	80389.7	297921	211.201
G11	16	207493	30474	86119.2	337975	541.341
G12	16	130897	20100.1	63287.1	279165	1239.55
H1	16	136751	22127.9	64833.4	292217	2495.12
H2	16	136958	22123.6	73358.8	306374	1202.96
H3	16	118082	20465.1	82289.9	322900	0
H4	16	138037	21729.1	83554.4	305789	513.539
H5	16	136555	21183.9	82540.6	291653	0
H6	16	170605	27139.7	98566.2	344354	887.659
H7	16	143410	20965.4	78015.6	289442	0
H8	16	147745	23307.9	91485.5	324543	558.337
H9	16	139898	21820.7	88019.9	329457	0
H10	16	130305	20468.9	82044.1	318994	55.0079
H11	16	152507	24419.9	86500.5	370942	633.793
H12	16	194725	32265.9	79324.4	358867	2897.07
A1	17	153348	25569.5	66433.6	297316	2052.83
A2	17	123873	21555.9	69013.3	277164	4351.77
A3	17	121001	19880.1	73589.5	274062	1005.27
A4	17	110917	18390.2	69590.9	248322	581.313
A5	17	109155	17992.2	72595.7	249621	382.718
A6	17	89973.5	15727.4	73070.7	251063	82.1705
A7	17	111828	25229.5	81578.1	253646	1019.8
A8	17	126022	22797.6	80820.4	266383	1105.32
A9	17	121305	21903.6	79616.9	283338	2460.23
A10	17	123658	19239.3	69298.6	258231	494.522
A11	17	127649	20399.3	73808.3	304505	613.309
A12	17	131933	21904.6	62589.7	295803	1167.15
B1	17	119233	18463.3	59809.6	249373	849.118
B2	17	131507	20671.3	78965.6	306086	242.474
B3	17	121860	20327.1	84594.5	295494	318.417
B4	17	127342	20779.2	86601.2	287798	615.704
B5	17	124065	20110.2	93166.9	304384	218.979
B6	17	101605	16484.1	78155.4	256259	0
B7	17	114150	17976.9	78156.3	255096	0
B8	17	117909	17916	81700.3	272162	0
B9	17	105787	16718.6	73235.5	255298	128.321
B10	17	96336.2	15847.6	71634.8	259370	76.9896
B11	17	115042	17276.9	73528.4	299252	0
B12	17	100483	17071.6	65149.3	279392	0
C1	17	60221.9	13798.3	64874.9	270915	231.543
C2	17	119808	19709.9	82783.8	313732	550.313
C3	17	105100	18702.1	89242.6	309664	272.07
C4	17	112271	19020.4	94844	302916	731.424
C5	17	102820	17514.7	87715.6	279283	206.548
C6	17	93976.8	16330.8	84384.8	263646	0
C7	17	96966.7	16616.4	77601.2	240102	0
C8	17	109762	19150.9	88716.9	278801	0
C9	17	101118	17202.2	83931.6	273344	157.11
C10	17	107256	16790.3	85525.4	296197	12.6443
C11	17	106172	16132.6	79014.6	303849	506.498
C12	17	125045	18349.3	79220.9	339278	918.484
D1	17	95213.8	16120.1	71798.9	291175	2164.34
D2	17	89069.3	14467.7	72698.1	274454	0
D3	17	113920	18387.5	85668.2	292672	1212.28
D4	17	105900	17020.8	87537.1	287425	1076.01
D5	17	93472.5	15642.3	82155.2	257473	0
D6	17	92142.2	14265.3	79396.9	248873	0
D7	17	82595	13366.6	71802.2	223812	0
D8	17	102236	16312.8	84442.3	268903	0
D9	17	98515.3	15585.7	81739.8	272164	0
D10	17	89355.5	14499	77433.3	274502	0
D11	17	89563.6	13554.9	78935.2	310072	0
D12	17	124782	18096.8	86550.8	363833	661.771
E1	17	155950	30439.2	87456.8	328668	816.779
E2	17	169912	28355.8	82157	298981	864.189
E3	17	140992	24688.5	85198.9	291921	344.354
E4	17	147092	24168.3	83669.1	266681	88.3555
E5	17	145097	23860.9	87754.3	269568	0
E6	17	154856	24694.9	93252.5	283818	0
E7	17	171390	28515.3	107806	317797	0
E8	17	146303	25330.3	89848.3	275446	226.359
E9	17	152018	27683.9	90355	292098	218.086
E10	17	132769	22728.5	75675.8	268979	0
E11	17	146347	23381.6	75770.1	289397	0
E12	17	130678	15785.6	65374.3	324478	0
F1	17	148363	26263.1	80500.6	334941	0
F2	17	153029	26133.1	85771.2	325350	630.652
F3	17	165986	27372.4	84891.7	288319	1191.88
F4	17	145979	25990.8	90122	293909	2202.66
F5	17	158624	25495.5	93983.1	299333	871.594
F6	17	155140	25645.6	98630.9	313497	0
F7	17	159772	25993.2	99117.5	316126	0
F8	17	168253	27385.4	98856.5	316578	74.1364
F9	17	146064	24719.8	92531.1	311831	0
F10	17	144490	24754.6	87537	313311	0
F11	17	121527	21158.5	67351.6	261268	0
F12	17	130660	24080.9	72462.9	314216	293.301
G1	17	116555	21731.1	72679.5	313178	0
G2	17	138711	22051.5	76448.6	298204	1036.38
G3	17	135291	23999.3	77061	281460	566.334
G4	17	129712	21672	86299.2	297096	55.3362
G5	17	136078	21980.3	89714.3	297252	1194.71
G6	17	134924	21524.2	89989.7	294378	224.509
G7	17	159961	27758.7	103293	332743	956.026
G8	17	157270	25405.4	100077	332537	0
G9	17	145390	24901	88899.3	300782	0
G10	17	158592	23374.4	80567.7	298351	0
G11	17	219236	32146	86246.7	338858	633.512
G12	17	139732	20419.8	62770.6	277949	1619.22
H1	17	154284	23374.7	64638.1	291308	2578.81
H2	17	154261	24066	73351	305984	693.626
H3	17	125977	21225.1	82425	322117	0
H4	17	147405	22529.1	83575.9	305695	668.33
H5	17	147838	22237.1	82778	291105	238.527
H6	17	182699	28245.2	98694	344134	982.192
H7	17	149293	21743.7	78003.4	289716	0
H8	17	154007	23658.6	91380	323688	481.667
H9	17	145586	22220	87777.9	328728	0
H10	17	131935	20676.7	81967.8	318941	508.542
H11	17	152030	24162.7	86046.4	370100	780.375
H12	17	194954	32347.7	79682	359266	2868.37
A1	18	156216	26237	66324.3	297178	2052.83
A2	18	126859	22280.8	69318.2	276595	4145.74
A3	18	124852	20271.2	73700.1	274663	594.201
A4	18	110565	18428.7	69688.6	248299	257.616
A5	18	110103	18089	72426.4	249798	371.201
A6	18	90300.1	15791	73304.2	250893	0
A7	18	111752	25892.4	82118.4	254019	1073.65
A8	18	126380	23350.1	80590.1	266863	803.788
A9	18	120451	21932.6	79487.3	283947	2387.24
A10	18	125074	19585	69627.1	258077	351.528
A11	18	128320	20733	73564.1	303678	688.811
A12	18	132821	22243.1	62294.9	296885	1073.78
B1	18	118825	18710.7	59908.4	249455	678.259
B2	18	132174	20391.5	78788.8	305756	279.778
B3	18	121975	20164.1	84886.2	296031	83.2464
B4	18	127901	21023.8	86710.9	287742	829.73
B5	18	123288	20342	93290.2	304414	0
B6	18	102289	16493.4	78555.5	256055	0
B7	18	114166	17922.9	78116.8	255338	0
B8	18	117841	17836.6	81910.6	272610	0
B9	18	106066	16972.7	73467.4	255600	381.542
B10	18	95899.2	16101	71768.2	259061	205.306
B11	18	114411	17671.5	73394.4	298796	0
B12	18	101121	17051.5	65040.5	279856	0
C1	18	60994.1	13774.2	65092.1	271490	238.855
C2	18	120849	20092.2	82807	314278	712.585
C3	18	107504	18982.6	89681	310002	335.972
C4	18	112167	19121.4	94528.7	303968	557.933
C5	18	103223	17701	88049.4	278899	374.777
C6	18	95135.7	16107.6	84485.6	263489	0
C7	18	97438.9	16693.1	77704.9	240186	0
C8	18	110962	19256.2	88742.7	277866	0
C9	18	102180	17156.5	84316.1	272647	64.4789
C10	18	107160	17048.7	85866.4	296024	233.434
C11	18	107505	16236.8	79429.3	303379	393.45
C12	18	125630	18774.7	79177.3	339506	737.712
D1	18	96304.4	16069	71631.1	291546	1915.46
D2	18	89265.4	14472.1	72974.2	274059	0
D3	18	113939	18646.5	85650.7	293258	1190.21
D4	18	105840	17180.4	87722.4	287523	490.69
D5	18	94255.1	15451.5	82321	257553	0
D6	18	92302.6	14529.7	79578.8	249699	0
D7	18	83741.2	13230	71611.2	223443	0
D8	18	104184	16487.3	84446.3	268795	0
D9	18	99040.9	15619.1	81815.5	271961	0
D10	18	89811.3	14520.5	77707.2	274420	0
D11	18	89651.3	13900.4	78795.8	309728	0
D12	18	125018	17866.9	86399.8	363940	1158.62
E1	18	156825	30353.8	87300.6	328702	810.131
E2	18	171155	27993.4	81906	298501	630.538
E3	18	141518	24911.2	85396.1	291531	82.7219
E4	18	148356	24174.3	83713.4	267279	408.263
E5	18	145908	23645.9	88062.5	270080	0
E6	18	155652	25145.7	92828.1	283865	231.546
E7	18	172746	28714	107870	317829	0
E8	18	145906	25329.2	89647.3	274633	0
E9	18	152418	27623.2	90633.2	292359	254.07
E10	18	132473	22550.6	75786.4	268856	0
E11	18	145390	23543.4	76099	289241	209.238
E12	18	131079	15748.2	65107.4	324555	0
F1	18	147757	26282.7	80501.8	335002	0
F2	18	153344	26665.1	85977.6	325648	962.93
F3	18	165718	27335	85351.1	288251	1059.01
F4	18	146878	26051.3	90113.9	292996	2024.57
F5	18	158624	25297.3	94192	299674	866.815
F6	18	155012	25478.7	98333.9	313844	0
F7	18	160023	26101.3	98831.8	315940	0
F8	18	170496	27761.6	99005.1	316383	0
F9	18	146278	25024.3	92800.4	312196	0
F10	18	144470	24950.9	87526.1	313639	0
F11	18	122251	20954.1	67543.9	260688	0
F12	18	131255	24059.6	73014.2	314872	192.549
G1	18	125493	23046.7	72662.7	312676	0
G2	18	146630	23074.9	76471.4	297802	984.402
G3	18	140323	24241.8	77229.5	280624	457.424
G4	18	131056	21898.2	86737	296826	417.699
G5	18	137618	22252.3	89913	297053	1106.79
G6	18	136738	21866.5	90083.3	294823	410.688
G7	18	167265	28413.4	103335	332741	1011.46
G8	18	165142	26208.4	100114	332675	0
G9	18	152156	25454.9	89388.1	301581	0
G10	18	181640	25779.7	80463.7	297273	0
G11	18	240957	34317.8	86322.2	339011	738.664
G12	18	156616	22189.7	63066.7	278269	1279.23
H1	18	181955	27251.4	64883.6	291775	2313.56
H2	18	185682	27655.1	73273.2	305958	902.496
H3	18	141460	23181.8	82354.4	322038	0
H4	18	164984	24024.8	83675.9	305880	818.567
H5	18	166530	23699.3	82865.1	291561	0
H6	18	207496	30631.2	98521.7	343403	717.501
H7	18	161312	22723.4	78111.8	289302	116.598
H8	18	166519	25090.6	91036.9	323865	817.211
H9	18	157404	23238.4	87990.9	328691	0
H10	18	132082	21124.7	82139.6	318434	300.859
H11	18	153146	24069.8	86662	370334	677.07
H12	18	194864	32429.4	79154.6	358675	3496.41
A1	19	163544	26834.7	66153.1	298014	2339.93
A2	19	132863	22718.8	68953.4	276911	4307.13
A3	19	130293	20684.9	73876.3	274157	756.437
A4	19	111265	18441.8	69724.4	248822	251.87
A5	19	110563	17860.2	72446.6	250396	276.407
A6	19	91567.1	15905.9	73539.4	251420	0
A7	19	112787	25960.1	82031.1	254234	1413.31
A8	19	126615	23495.8	80661.7	266998	1200.86
A9	19	121261	21785	79595.2	283833	2402.45
A10	19	127061	19559.9	69764.2	258233	524.312
A11	19	130769	21189	73685.7	303001	860.723
A12	19	135823	22225.5	62855.4	296728	984.411
B1	19	120393	18610.9	59984.5	249443	556.069
B2	19	132348	20392.7	78738	305776	0
B3	19	122482	20138.4	84871.8	295866	389.177
B4	19	127378	20797.9	87125.5	287573	670.479
B5	19	124394	19953.6	93536.8	304423	0
B6	19	101888	16380.1	78277.4	255645	0
B7	19	114452	17996.8	78004.9	255422	0
B8	19	118472	17919.6	81833.6	272784	0
B9	19	106423	16950.7	73150.1	255665	284.873
B10	19	95679.8	15884.1	71805.5	259317	249.979
B11	19	114250	17722.8	73804	299041	0
B12	19	101740	16905	64928.3	279816	0
C1	19	63256.1	14004.3	65177.9	271468	234.793
C2	19	124262	20137.8	83110.4	313925	616.835
C3	19	111221	19351.4	89950.2	309618	83.2668
C4	19	112879	18945.4	94751.1	304048	701.852
C5	19	103591	17795.6	88133.6	278533	376.646
C6	19	95867.2	16474.9	84394.6	263812	0
C7	19	99387.5	16685.3	77765.1	240417	12.1927
C8	19	115087	19611	89009.6	278477	0
C9	19	103291	17484.7	84271.7	272898	96.2642
C10	19	108666	17304.3	85986.8	295774	120.607
C11	19	107353	15785.8	79123.4	303783	212.796
C12	19	125432	18380.8	79343.9	339278	704.481
D1	19	96568.1	15969.2	72062.1	291397	2246.03
D2	19	89987.4	14687	72919.7	274341	0
D3	19	114554	18366.5	85828.5	293135	1185.61
D4	19	108266	17096.8	87724.4	286938	1029.18
D5	19	95730.3	15700.4	82390.8	257904	66.8051
D6	19	93551.1	14416.6	79755.3	249594	0
D7	19	84505.1	13693.1	71804.7	223624	0
D8	19	104271	16630.8	84734.4	268848	0
D9	19	100972	15658.2	81910.6	271966	0
D10	19	90774.6	14781.2	77770.5	274668	163.042
D11	19	91532.7	14100	78947.4	310374	0
D12	19	124294	18050.2	86570.3	364045	649.166
E1	19	156980	30181.8	87826.1	328775	866.166
E2	19	170734	28443.9	82262.5	298506	656.143
E3	19	141111	24825.4	85347.6	291647	467.475
E4	19	147961	23730.6	83646.5	267394	276.238
E5	19	146504	23722	88008.9	270497	0
E6	19	155995	24798.8	93286.7	284383	229.558
E7	19	172254	28588	108269	317836	0
E8	19	146526	25608.1	90078.1	274716	0
E9	19	152914	27327.7	90963.4	292439	54.5215
E10	19	133778	22478.5	75694.4	268741	154.821
E11	19	146253	23474.9	76139.7	290012	373.866
E12	19	131437	15915.6	65647.8	324991	0
F1	19	146948	26716.7	80234.6	335681	0
F2	19	152615	26443.4	85954.9	325917	896.249
F3	19	165704	27208	84806.2	289063	1395.53
F4	19	146906	25934.4	90545.4	293264	2001.08
F5	19	157925	25148.3	93869.4	299293	183.493
F6	19	155399	25361.2	98687.3	314624	0
F7	19	160728	26207.6	99508.4	316063	111.33
F8	19	168436	27411.7	99218.3	317121	0
F9	19	145500	24656	92677.8	311698	0
F10	19	144590	24978	87330.2	314077	0
F11	19	121482	21275.5	67063.1	260859	0
F12	19	130894	24007.6	72760.6	314884	0
G1	19	144256	24958.2	72904.6	313318	0
G2	19	158966	24289.4	76791.4	298226	1180.42
G3	19	149268	24995.5	77064.8	280952	590.01
G4	19	134671	21912.7	86895.7	297982	597.095
G5	19	140572	22369.2	89816.5	297189	786.806
G6	19	139333	22179.6	90473.7	295200	454.494
G7	19	180028	29499.9	103519	332577	1189.44
G8	19	176653	26914.6	100108	332704	65.3932
G9	19	166316	26426.6	89237.1	301368	0
G10	19	224152	29547.3	80819.6	297396	294.401
G11	19	282156	39093.6	85788.5	338725	688.035
G12	19	185823	26255.5	62748.1	278151	1120.49
H1	19	233213	33585.2	64432.7	290807	2622.79
H2	19	242533	34283.6	73870.4	306105	906.963
H3	19	169474	25992.8	82240.5	323477	0
H4	19	198377	27539.4	83782.5	306107	614.608
H5	19	202378	27296.2	83104.9	291648	0
H6	19	253653	35254.1	98765.7	344517	848.901
H7	19	182452	24790.9	78273.6	289886	0
H8	19	189802	27002	91726.8	324422	291.346
H9	19	178236	25497.2	87893.1	329038	0
H10	19	132354	20878.8	81840.4	319135	0
H11	19	154514	24465.6	86586.1	371148	649.149
H12	19	197011	33161.2	79502.4	359407	3081.09
A1	20	177236	29313.7	66333.2	297098	1932.34
A2	20	146118	24574.9	69007.8	276854	3998.09
A3	20	141018	21827.6	74019.1	275122	886.823
A4	20	113016	18588.2	69783.6	248743	184.833
A5	20	112533	18149	72632.6	250416	351.711
A6	20	93061.3	16111.3	73676.3	251484	0
A7	20	113295	26027.1	82439.6	254700	1467.15
A8	20	127250	23676.9	81132.6	267011	901.084
A9	20	123120	21835.2	79272.6	284034	2618.36
A10	20	132465	19926.7	69816.7	258019	505.445
A11	20	135788	21601.6	73990.6	304102	985.011
A12	20	140097	22971.6	62642.8	296823	1164.49
B1	20	120783	18543.6	59810.6	249055	600.596
B2	20	134056	20554.1	78661.7	305845	257.629
B3	20	123146	20295.3	84712	295505	232.049
B4	20	128490	20966.9	86757.1	287228	611.647
B5	20	124315	20185.5	93064.2	304537	0
B6	20	102805	16268.5	78604.7	256668	0
B7	20	114242	17904.6	78072.9	255018	0
B8	20	119499	18016.3	81816.7	272102	0
B9	20	106662	16857.9	73113.7	255614	348.178
B10	20	96032.8	15947	72000.4	259112	318.414
B11	20	116449	17407.7	73831.2	298699	0
B12	20	100992	16966.5	65000.9	280394	0
C1	20	67497.8	14694.9	65064.4	271730	381.843
C2	20	129350	20631	83184.8	313803	631.953
C3	20	119104	19921.8	89725.7	309853	395.033
C4	20	113915	19042.6	94906.3	303959	634.821
C5	20	105074	17930.1	88385.1	278669	222.436
C6	20	97085.3	16468.6	84379.1	264535	0
C7	20	103522	17339.4	77702.5	239549	0
C8	20	121813	20017.4	88876.7	278428	0
C9	20	105090	17795.4	84315.2	272838	192.528
C10	20	110058	17017.7	85325	296236	129.361
C11	20	108905	16013.5	79021.1	303732	631.737
C12	20	127259	18719.6	78881.3	339739	735.053
D1	20	97304.2	16270.1	72104.4	291297	2327.71
D2	20	91554.6	14894	72667.8	274373	0
D3	20	115580	18646.5	85990.6	293211	1207.68
D4	20	111018	17397.6	87552.8	286907	1061.37
D5	20	98423.8	15878.5	82255.8	258196	0
D6	20	94489.3	14471.4	79799.4	249600	0
D7	20	86426.4	13591.2	72094.9	223929	0
D8	20	106411	16823.7	84793.8	268799	0
D9	20	102491	15882.2	81635.1	272325	0
D10	20	91858.4	14592.1	77615.9	275205	153.882
D11	20	92291.6	13991.6	78693.8	310183	0
D12	20	125104	18008.8	86674.1	364753	546.224
E1	20	158300	30288.1	87603.1	328869	785.437
E2	20	172267	28174.1	82010.5	299151	516.38
E3	20	142083	24644.2	85388.4	292118	128.892
E4	20	149391	24183.4	84108.7	267217	0
E5	20	146875	23829.1	88406.5	270647	0
E6	20	156462	24849.4	93600.5	284230	0
E7	20	173728	28542.4	108519	317943	0
E8	20	147284	25539.2	90055.7	274335	26.6932
E9	20	152718	27869	90998.1	292381	78.511
E10	20	133723	22561.5	75537.8	268910	439.491
E11	20	146703	23486.6	75958.1	289205	71.162
E12	20	132123	15841.7	65427.9	324874	0
F1	20	147910	26446.1	80727.3	335494	0
F2	20	152790	26385.1	86155.6	326522	881.556
F3	20	166508	27415.7	84931.1	289190	1303.4
F4	20	146487	26268.2	90165.1	292994	2466.86
F5	20	159195	25154	93985	299831	632.67
F6	20	155143	25595.4	98894.5	313900	0
F7	20	161417	26234.1	99701.5	316378	45.5001
F8	20	170104	27310.8	99205.4	317751	278.28
F9	20	145629	24672.2	92226.9	311433	0
F10	20	143743	24577.7	87207.2	313191	0
F11	20	121812	21015.2	67529.4	260894	0
F12	20	131655	23962.7	73025.2	314716	0
G1	20	176124	28724.3	72868.4	314069	0
G2	20	183067	26712.7	76857.6	298237	1182.58
G3	20	168835	27272	77101.2	280742	562.546
G4	20	141188	22463.6	86630.3	297772	349.867
G5	20	147529	22565.4	89819.2	297637	1177.49
G6	20	145901	22436.4	90225.2	294703	386.959
G7	20	204397	31733.9	103770	332702	1013.41
G8	20	202374	29288.1	100468	333506	0
G9	20	190334	28601.6	89435.8	302187	0
G10	20	299033	37170.9	80410.1	297950	0
G11	20	355243	46659	86050.2	338164	588.076
G12	20	240905	32112.1	62335.2	277699	1420.78
H1	20	314976	44102	65020	291749	2156.1
H2	20	331328	44669.3	73772.4	306047	1108.01
H3	20	220549	31167.9	82549	322818	0
H4	20	257668	33336.3	83824.6	306198	612.787
H5	20	263132	33007.8	82960.5	291269	6.49053
H6	20	331509	42562	98727.9	343681	694.813
H7	20	223481	28665.6	78377.7	289847	77.1605
H8	20	234055	31375.5	91470.9	324053	511.433
H9	20	219238	29710.9	87709.2	328438	0
H10	20	134416	20829.1	82003.1	319113	289.633
H11	20	157176	24954.2	86736.5	371213	956.274
H12	20	200839	33045.7	79471.1	359152	2603.31
A1	21	204081	33022.9	66386.3	297584	1712.18
A2	21	169474	27524.8	69329.3	276650	4546.35
A3	21	162249	24461.7	73932	274608	1087.88
A4	21	115462	18917.4	70059.1	249241	0
A5	21	116921	18718.8	72702.7	250449	490.8
A6	21	95430.5	16580	73568	251269	0
A7	21	114836	26411.9	82738.5	254856	1110.1
A8	21	128113	23797.4	81339.5	267341	1124.6
A9	21	122869	22336.7	79725.8	283921	2257.49
A10	21	142213	20913.4	69817.6	258329	472.676
A11	21	145591	22763.8	73833.1	303907	767.798
A12	21	147396	23789.5	62983.1	296908	1413.92
B1	21	123033	18891.9	59951.6	249279	619.235
B2	21	135350	20694	78814.2	305668	153.878
B3	21	125756	20533.1	84683.2	296344	246.617
B4	21	129351	20784.2	86931.2	287677	638.02
B5	21	124472	19999.2	93437.2	304886	38.0386
B6	21	103162	16443.5	78660.8	256183	0
B7	21	115313	18003.5	78380.1	255430	0
B8	21	119584	17765.2	82153.6	272253	0
B9	21	106822	16874.1	73411.5	255843	266.053
B10	21	96502.1	15742.8	71641.3	259554	228.117
B11	21	115640	17163.5	73732.1	298961	0
B12	21	101456	17070.4	65055.3	280164	0
C1	21	75012.6	15344.9	65133	271090	303.85
C2	21	139789	22054.6	83086.3	314061	376.955
C3	21	136120	21645.8	89647	310386	388.256
C4	21	114540	19070.4	95052.6	304263	824.084
C5	21	106785	17919.2	88320.6	278502	391.599
C6	21	99781	16879.5	84734.3	264282	0
C7	21	109115	17740.5	77892.9	240244	0
C8	21	134660	21270.9	89140.7	279261	0
C9	21	110321	17878.7	84457.5	273713	185.263
C10	21	112316	17271.4	85329.8	296264	318.054
C11	21	112325	16618	79431.5	304777	564.13
C12	21	130694	18845.6	79267	339189	614.095
D1	21	98862.2	16111.2	71992.1	291101	1668.11
D2	21	94235.3	14938.2	73134.4	273722	3.41799
D3	21	116294	18673.9	85773.2	293310	1494.66
D4	21	116851	17739.7	87719.5	287216	653.602
D5	21	103646	16510.8	82558.5	257731	36.6056
D6	21	97271.9	14738.4	79759.8	249691	0
D7	21	90611.5	13922.6	71909	223903	0
D8	21	110723	16936.2	84709.7	269012	73.5453
D9	21	106303	16208.3	81992.1	271753	0
D10	21	93263.7	14803.6	77860.9	275482	564.236
D11	21	95489.7	14150.7	78978.7	310009	0
D12	21	125627	18053.3	87061.4	364451	377.104
E1	21	158647	30709.2	87905.7	329671	1156.79
E2	21	172655	28253.4	82160.2	298969	648.675
E3	21	143196	24802.3	85430.2	291381	0
E4	21	151291	24143.1	83815.3	267024	54.8413
E5	21	149733	24240.9	88127.2	270735	0
E6	21	158450	25337.1	93308.8	284050	0
E7	21	174629	28955.1	107759	318156	0
E8	21	148157	25439.9	89770.3	274142	0
E9	21	154664	28116.9	91208.1	292958	0
E10	21	133629	22788.8	75885.3	268640	69.919
E11	21	146800	23570.2	76140.8	289830	322.884
E12	21	132011	15632	65419.4	324824	0
F1	21	147174	26248.7	80393.9	335018	0
F2	21	153276	26341.9	85897.1	326369	905.29
F3	21	166250	27357.6	85220.3	288949	1429.47
F4	21	146896	26109.7	90449.1	293209	2356.29
F5	21	159372	25552.4	94214.4	298853	526.588
F6	21	155973	25031.8	98787.2	313858	0
F7	21	161249	26207.6	99254.9	315976	0
F8	21	170291	27714.3	99334.6	317164	0
F9	21	146683	24582.6	92334.1	312028	0
F10	21	144645	24905.4	87565.3	314091	0
F11	21	122361	20999.4	67368.1	260239	0
F12	21	131481	24168.4	72913.8	314635	0
G1	21	235127	35966.1	73147.9	313372	0
[truncated: 10,775 more rows]

## Sheet: Multicomponent Data
Block Type	96fast
Chemistry	SYBR_GREEN
Experiment File Name	S:\LQW\ZHB\2014.eds
Experiment Run End Time	2012-05-24 02:00:11 AM CST
Instrument Type	sds7500fast
Passive Reference	ROX
Well	Cycle	SYBR	ROX
A1	1	147257	303854
A2	1	117346	279473
A3	1	116366	281278
A4	1	109585	254874
A5	1	107591	254802
A6	1	89257.4	256250
A7	1	109594	259875
A8	1	122428	271467
A9	1	117447	283350
A10	1	117151	264006
A11	1	121804	311735
A12	1	126200	306116
B1	1	113610	253579
B2	1	131271	310504
B3	1	120374	302025
B4	1	125829	291827
B5	1	120641	310270
B6	1	99052	262101
B7	1	108280	258208
B8	1	114888	286914
B9	1	103077	265916
B10	1	95569.7	261796
B11	1	113974	303251
B12	1	100571	283935
C1	1	56067	274658
C2	1	112883	320048
C3	1	98142.5	315995
C4	1	109912	311247
C5	1	101199	283069
C6	1	91403.5	270947
C7	1	93300.1	251538
C8	1	107183	290454
C9	1	97570.9	288302
C10	1	103989	308529
C11	1	102889	310749
C12	1	121548	348248
D1	1	94643.2	296208
D2	1	86482.8	281431
D3	1	109644	298759
D4	1	102568	290496
D5	1	91100.9	265191
D6	1	90696.7	253361
D7	1	79377.5	228992
D8	1	98625.3	281460
D9	1	93164.6	275054
D10	1	89010.1	275311
D11	1	89552.7	310481
D12	1	126939	367488
E1	1	156057	336200
E2	1	164667	304507
E3	1	137535	299235
E4	1	144403	271880
E5	1	143590	275485
E6	1	155110	294212
E7	1	172106	338309
E8	1	146269	280997
E9	1	149341	298609
E10	1	127742	273137
E11	1	144082	292992
E12	1	132960	332504
F1	1	148505	342031
F2	1	151004	331672
F3	1	157833	294684
F4	1	145359	299642
F5	1	156304	306498
F6	1	153568	322569
F7	1	157562	325304
F8	1	166729	321704
F9	1	148486	332850
F10	1	142734	321202
F11	1	121737	263246
F12	1	133111	318261
G1	1	104837	314999
G2	1	130877	301341
G3	1	116195	284996
G4	1	127121	301278
G5	1	134021	302149
G6	1	132816	303215
G7	1	154007	342064
G8	1	150399	340362
G9	1	139131	308114
G10	1	134368	305911
G11	1	192440	349348
G12	1	125039	286256
H1	1	122422	295598
H2	1	120535	311734
H3	1	111783	328052
H4	1	129773	313824
H5	1	127017	299137
H6	1	152853	353867
H7	1	138110	297399
H8	1	141587	332178
H9	1	133704	332530
H10	1	134415	325453
H11	1	154025	377609
H12	1	197625	367838
A1	2	146899	300831
A2	2	119353	280671
A3	2	116210	277626
A4	2	110334	252672
A5	2	108014	254032
A6	2	89151.5	255474
A7	2	110225	257385
A8	2	122460	269039
A9	2	119135	286451
A10	2	118551	262713
A11	2	123855	308996
A12	2	126923	303755
B1	2	115071	253233
B2	2	132607	311016
B3	2	119949	298693
B4	2	124970	292755
B5	2	122325	310264
B6	2	100679	260880
B7	2	110258	255889
B8	2	115083	278493
B9	2	103191	257729
B10	2	96387.9	262150
B11	2	115358	300681
B12	2	100220	281709
C1	2	57283.5	274040
C2	2	114736	317528
C3	2	99816.7	312326
C4	2	110823	307039
C5	2	101580	280445
C6	2	92037.4	266373
C7	2	93785.8	246012
C8	2	106926	283264
C9	2	98978.9	278108
C10	2	104768	300274
C11	2	104419	308366
C12	2	121482	345391
D1	2	95097.6	295347
D2	2	86533.7	278435
D3	2	111360	298697
D4	2	102821	291871
D5	2	91520.9	262152
D6	2	91504.1	254244
D7	2	80213.4	226524
D8	2	99375.6	274158
D9	2	94327.1	273566
D10	2	90183.4	276248
D11	2	89435.6	309598
D12	2	126190	367259
E1	2	156561	333216
E2	2	169744	302513
E3	2	137604	295752
E4	2	148234	271648
E5	2	145659	273027
E6	2	155403	289466
E7	2	174594	330492
E8	2	147746	279870
E9	2	151507	295745
E10	2	132534	271010
E11	2	145680	292734
E12	2	132437	329368
F1	2	146876	337827
F2	2	153804	332284
F3	2	161057	293387
F4	2	145744	298914
F5	2	158714	305863
F6	2	155014	322090
F7	2	157741	321755
F8	2	166137	321580
F9	2	148622	320076
F10	2	148105	319648
F11	2	123664	263286
F12	2	134580	317846
G1	2	105315	314171
G2	2	131061	302013
G3	2	123716	284604
G4	2	128890	301220
G5	2	133747	300833
G6	2	132976	301740
G7	2	153073	338325
G8	2	152593	337814
G9	2	139624	305156
G10	2	134312	303991
G11	2	193527	347167
G12	2	125135	284921
H1	2	122910	293490
H2	2	119752	310057
H3	2	112195	327633
H4	2	129812	312819
H5	2	127965	297136
H6	2	154133	352708
H7	2	138637	295876
H8	2	142041	330623
H9	2	134190	334675
H10	2	134235	323812
H11	2	154750	375062
H12	2	198366	365732
A1	3	146045	300049
A2	3	118395	280997
A3	3	115286	276509
A4	3	111102	250615
A5	3	107706	251966
A6	3	88465.6	253884
A7	3	109459	256999
A8	3	122683	267153
A9	3	119182	284699
A10	3	117893	261674
A11	3	123580	307749
A12	3	127287	302167
B1	3	113796	251950
B2	3	132406	310237
B3	3	119338	297728
B4	3	125774	291325
B5	3	122208	307885
B6	3	100718	260278
B7	3	109777	256744
B8	3	115593	274494
B9	3	103355	258128
B10	3	95960.7	261674
B11	3	113967	300594
B12	3	100298	281176
C1	3	57051.4	272945
C2	3	114882	315435
C3	3	99023.2	312031
C4	3	111450	307531
C5	3	101863	281260
C6	3	92384.2	266501
C7	3	93533.3	243647
C8	3	106949	281738
C9	3	98772.8	274126
C10	3	104397	298400
C11	3	104598	307998
C12	3	122218	343777
D1	3	95235.7	293825
D2	3	86370.7	276339
D3	3	111214	297846
D4	3	103130	291729
D5	3	91881.5	262139
D6	3	90706.2	254072
D7	3	80392	227122
D8	3	100105	272736
D9	3	94895.6	274273
D10	3	89098.3	275565
D11	3	89314	309183
D12	3	126103	367029
E1	3	156447	332442
E2	3	168133	302365
E3	3	138020	294746
E4	3	146767	270051
E5	3	145518	273653
E6	3	156123	289772
E7	3	172081	324434
E8	3	146674	278797
E9	3	151013	295317
E10	3	131771	271181
E11	3	146089	292893
E12	3	130807	327728
F1	3	147053	336069
F2	3	152611	330575
F3	3	159891	292880
F4	3	146547	299278
F5	3	159146	305245
F6	3	155361	321227
F7	3	157716	321527
F8	3	167708	321892
F9	3	146190	315193
F10	3	147271	318259
F11	3	123811	262781
F12	3	132730	315238
G1	3	105598	312504
G2	3	130362	299738
G3	3	126416	283622
G4	3	127846	299982
G5	3	134086	301317
G6	3	133151	301120
G7	3	153687	337309
G8	3	149972	336662
G9	3	138506	305386
G10	3	133604	301513
G11	3	194161	343657
G12	3	123013	282674
H1	3	121157	292704
H2	3	119308	307029
H3	3	112072	324240
H4	3	129671	310364
H5	3	126474	294885
H6	3	154274	350752
H7	3	137148	294449
H8	3	141201	329061
H9	3	133187	332443
H10	3	133381	321693
H11	3	152941	373736
H12	3	196735	364477
A1	4	146841	299975
A2	4	119004	280875
A3	4	115898	275558
A4	4	109496	250443
A5	4	107220	251413
A6	4	89015.5	253327
A7	4	110588	255887
A8	4	122964	267320
A9	4	118988	285552
A10	4	119045	260452
A11	4	123416	307105
A12	4	127079	298832
B1	4	113940	251817
B2	4	132586	310711
B3	4	119429	297683
B4	4	125168	290828
B5	4	121296	307768
B6	4	100274	259792
B7	4	110983	257296
B8	4	115601	275086
B9	4	103786	258450
B10	4	96276.5	261579
B11	4	114455	299828
B12	4	100701	281318
C1	4	57106.2	271863
C2	4	115408	315815
C3	4	98957	311893
C4	4	112337	306939
C5	4	101614	281004
C6	4	92285.4	266251
C7	4	93286.2	242504
C8	4	107050	282648
C9	4	99141	274719
C10	4	104497	298711
C11	4	103808	307156
C12	4	122351	343448
D1	4	94638.9	294048
D2	4	86620.9	276260
D3	4	111969	296579
D4	4	103495	291639
D5	4	92237.6	262182
D6	4	91635.5	253510
D7	4	80478.2	227326
D8	4	100705	272864
D9	4	94956.8	274330
D10	4	89747.9	275402
D11	4	89617.6	309912
D12	4	125551	366603
E1	4	155209	332865
E2	4	168665	301771
E3	4	138510	295010
E4	4	146859	270435
E5	4	143893	272981
E6	4	154894	289902
E7	4	171591	323917
E8	4	146500	278988
E9	4	151640	294846
E10	4	131149	271190
E11	4	145878	292641
E12	4	130582	327089
F1	4	147775	336258
F2	4	152396	329857
F3	4	160706	292548
F4	4	146199	298913
F5	4	157610	304516
F6	4	154884	319737
F7	4	158401	321756
F8	4	167787	322076
F9	4	148590	315695
F10	4	146417	317373
F11	4	122532	262915
F12	4	131290	316085
G1	4	104636	312716
G2	4	130229	299481
G3	4	126108	284016
G4	4	128436	299612
G5	4	133927	301276
G6	4	132659	299335
G7	4	153246	337171
G8	4	150046	336418
G9	4	139116	305132
G10	4	133018	301355
G11	4	194261	342027
G12	4	123439	282278
H1	4	121310	292565
H2	4	118406	307323
H3	4	110735	324451
H4	4	127754	309172
H5	4	126998	294973
H6	4	155585	350021
H7	4	137628	293015
H8	4	141251	328129
H9	4	132299	332059
H10	4	132362	320631
H11	4	152794	372388
H12	4	195246	362901
A1	5	147630	299450
A2	5	118616	279107
A3	5	115638	276211
A4	5	110005	249872
A5	5	108169	251935
A6	5	89059.4	253476
A7	5	110154	256425
A8	5	122976	268024
A9	5	118825	286089
A10	5	119491	260409
A11	5	122710	306715
A12	5	127740	298662
B1	5	113719	251292
B2	5	130134	310522
B3	5	119494	299024
B4	5	124555	291358
B5	5	122342	307904
B6	5	100828	259306
B7	5	111165	258298
B8	5	115672	275328
B9	5	103730	257786
B10	5	96415.7	261537
B11	5	114250	300355
B12	5	100211	281064
C1	5	56488.4	272281
C2	5	114712	316143
C3	5	99977.7	312615
C4	5	111461	306674
C5	5	102162	282106
C6	5	92620.7	266681
C7	5	94114.5	243067
C8	5	107870	281976
C9	5	98053.8	275506
C10	5	105435	299176
C11	5	104048	307423
C12	5	121085	342692
D1	5	95049.7	293560
D2	5	87533.8	276740
D3	5	110814	297371
D4	5	103315	291971
D5	5	91891.7	262540
D6	5	91098.5	253778
D7	5	80447.8	227260
D8	5	99575.4	273327
D9	5	94932.3	275375
D10	5	89353.4	276724
D11	5	88929.8	310147
D12	5	124430	366669
E1	5	156956	331119
E2	5	168830	301553
E3	5	138322	294753
E4	5	146727	270994
E5	5	144257	272576
E6	5	155846	289506
E7	5	171585	323482
E8	5	146363	278730
E9	5	150972	295575
E10	5	131267	271505
E11	5	145373	292203
E12	5	130083	326923
F1	5	147120	337307
F2	5	152536	330233
F3	5	161812	292647
F4	5	146131	299168
F5	5	158857	303739
F6	5	155116	319888
F7	5	157455	321302
F8	5	167497	322054
F9	5	148447	316917
F10	5	146343	316905
F11	5	122824	262824
F12	5	132005	315983
G1	5	104620	312546
G2	5	130833	299308
G3	5	127703	284087
G4	5	127280	299239
G5	5	133794	300773
G6	5	132607	299856
G7	5	152913	337083
G8	5	149625	336453
G9	5	138574	304997
G10	5	132252	300651
G11	5	192873	341990
G12	5	122553	281388
H1	5	121205	291948
H2	5	118870	306597
H3	5	111434	324266
H4	5	128210	308901
H5	5	127495	295217
H6	5	155540	348827
H7	5	136736	292857
H8	5	140685	327238
H9	5	132208	332147
H10	5	133027	321340
H11	5	153543	371959
H12	5	193455	362450
A1	6	146183	299797
A2	6	118862	280252
A3	6	116312	276130
A4	6	109891	250375
A5	6	108102	252267
A6	6	89597.2	253562
A7	6	110258	256646
A8	6	123778	268972
A9	6	118824	286058
A10	6	119464	260675
A11	6	124107	307182
A12	6	128304	298950
B1	6	112947	251800
B2	6	130747	310013
B3	6	119892	298928
B4	6	124889	291085
B5	6	122354	308439
B6	6	100548	259499
B7	6	111429	258829
B8	6	115901	275068
B9	6	104600	258203
B10	6	96091.8	261567
B11	6	114006	300415
B12	6	100864	281619
C1	6	56168.7	273598
C2	6	115364	315424
C3	6	99912.7	312351
C4	6	110919	307047
C5	6	101926	281559
C6	6	93401.9	266894
C7	6	93460.8	242947
C8	6	107740	282716
C9	6	99124.9	276185
C10	6	103945	299338
C11	6	104779	308000
C12	6	122622	342548
D1	6	95390.8	293695
D2	6	86866.3	277494
D3	6	111933	297512
D4	6	103139	291663
D5	6	92154.5	262453
D6	6	90861.6	254486
D7	6	81167.2	228262
D8	6	101212	273248
D9	6	96236.1	275468
D10	6	89842.2	277306
D11	6	89470	310531
D12	6	124726	367105
E1	6	155910	331590
E2	6	169025	301791
E3	6	138392	295373
E4	6	145819	270883
E5	6	144590	273375
E6	6	154816	290130
E7	6	172776	324835
E8	6	146316	279512
E9	6	151186	296437
E10	6	132165	272445
E11	6	145558	293361
E12	6	130821	326422
F1	6	148011	337669
F2	6	152856	330109
F3	6	162390	293100
F4	6	145830	298380
F5	6	157708	304333
F6	6	154996	320439
F7	6	158802	322192
F8	6	167330	322459
F9	6	148310	316545
F10	6	144955	317940
F11	6	121850	262659
F12	6	132038	315780
G1	6	106070	313397
G2	6	130245	299934
G3	6	127868	284185
G4	6	127764	299939
G5	6	133655	301890
G6	6	132119	300217
G7	6	153286	337388
G8	6	149967	337148
G9	6	138866	304707
G10	6	132690	301857
G11	6	193266	341851
G12	6	122852	281365
H1	6	121826	293201
H2	6	118301	307786
H3	6	110861	324958
H4	6	129018	309071
H5	6	127167	295740
H6	6	155915	349711
H7	6	137017	293097
H8	6	140818	327993
H9	6	132520	332568
H10	6	132203	321641
H11	6	153185	372439
H12	6	194864	362266
A1	7	146697	299682
A2	7	119464	279460
A3	7	116394	276434
A4	7	109965	250726
A5	7	107575	252429
A6	7	89272.4	253768
A7	7	110555	257158
A8	7	123683	269094
A9	7	119762	286435
A10	7	119680	260792
A11	7	124462	307020
A12	7	129270	299091
B1	7	114488	251778
B2	7	131129	309980
B3	7	120707	299817
B4	7	125532	291555
B5	7	122998	308509
B6	7	100715	259704
B7	7	112279	259175
B8	7	116353	275470
B9	7	104601	258224
B10	7	96000.1	262696
B11	7	114600	300811
B12	7	101153	282129
C1	7	56916.2	272893
C2	7	115375	316601
C3	7	100985	313271
C4	7	111684	307828
C5	7	101857	282674
C6	7	92239.4	267158
C7	7	93928.3	243977
C8	7	107883	282860
C9	7	99373.6	276120
C10	7	105880	300640
C11	7	104366	308049
C12	7	123630	343446
D1	7	95071.8	293670
D2	7	87471.4	277129
D3	7	112368	297585
D4	7	103796	292325
D5	7	92237.7	262936
D6	7	91475.3	254498
D7	7	80632.5	228058
D8	7	100740	274154
D9	7	96354	275638
D10	7	89660.3	277484
D11	7	89412.8	310937
D12	7	125398	366892
E1	7	156527	331708
E2	7	168491	302296
E3	7	138805	295384
E4	7	146989	271821
E5	7	144042	273594
E6	7	155481	290225
E7	7	171927	325401
E8	7	146905	279861
E9	7	151376	296540
E10	7	131195	272429
E11	7	145311	293334
E12	7	130531	326398
F1	7	147275	338212
F2	7	152436	330318
F3	7	163672	292557
F4	7	146276	299099
F5	7	157864	305274
F6	7	154063	321000
F7	7	158877	322225
F8	7	168866	322770
F9	7	148373	317597
F10	7	145326	317925
F11	7	122238	263021
F12	7	131446	316493
G1	7	105953	313695
G2	7	131029	299596
G3	7	127917	284870
G4	7	127830	299919
G5	7	132957	302009
G6	7	133262	299571
G7	7	152373	337940
G8	7	150749	337377
G9	7	137751	305643
G10	7	133000	300848
G11	7	193360	342177
G12	7	121850	281399
H1	7	122699	293423
H2	7	118853	307780
H3	7	111225	324902
H4	7	128849	309455
H5	7	127166	295859
H6	7	155628	349916
H7	7	137463	293226
H8	7	140803	328670
H9	7	133434	332980
H10	7	131666	321587
H11	7	153377	372926
H12	7	192060	361977
A1	8	146649	299746
A2	8	119679	280100
A3	8	117949	276354
A4	8	110313	251025
A5	8	107678	252817
A6	8	89783.7	254480
A7	8	110297	257349
A8	8	123994	270196
A9	8	119587	286811
A10	8	120786	260993
A11	8	124987	307418
A12	8	129135	298098
B1	8	113576	251567
B2	8	130580	310528
B3	8	121154	300345
B4	8	126069	291859
B5	8	123058	308241
B6	8	101074	260219
B7	8	112172	259601
B8	8	115611	275687
B9	8	104980	259034
B10	8	96207.6	262445
B11	8	114267	301596
B12	8	101052	281924
C1	8	57252.7	273290
C2	8	116003	316981
C3	8	100989	314428
C4	8	111950	308608
C5	8	101898	282893
C6	8	93408.5	267865
C7	8	94310.9	244118
C8	8	107353	283720
C9	8	99549.2	276797
C10	8	105619	300941
C11	8	105349	308426
C12	8	123110	343433
D1	8	95317.7	293588
D2	8	87065.8	277660
D3	8	112234	297696
D4	8	103882	292656
D5	8	92102.6	263529
D6	8	91067	254748
D7	8	81047.9	227871
D8	8	101150	274160
D9	8	95763.5	276694
D10	8	89761.6	277437
D11	8	88769.7	311971
D12	8	125661	367387
E1	8	156332	331646
E2	8	169215	302115
E3	8	139574	295706
E4	8	145302	272407
E5	8	145550	273907
E6	8	155776	290432
E7	8	172531	325124
E8	8	146321	279804
E9	8	151277	296751
E10	8	132165	272555
E11	8	145693	293456
E12	8	130515	326633
F1	8	146711	337664
F2	8	152952	330195
F3	8	165139	292930
F4	8	146744	299441
F5	8	158548	305369
F6	8	155003	320870
F7	8	159934	322926
F8	8	168460	323087
F9	8	148403	317389
F10	8	145129	318296
F11	8	122273	262995
F12	8	131377	316053
G1	8	106177	314671
G2	8	131550	300320
G3	8	129115	284694
G4	8	127987	300106
G5	8	134387	302799
G6	8	132178	299838
G7	8	153011	338724
G8	8	150347	338284
G9	8	138909	305351
G10	8	133913	302447
G11	8	194426	343529
G12	8	121844	282241
H1	8	122432	292229
H2	8	118476	307894
H3	8	110733	325437
H4	8	128650	309093
H5	8	127405	295424
H6	8	156419	349763
H7	8	137451	293313
H8	8	141313	328924
H9	8	132363	332387
H10	8	132258	322148
H11	8	152784	373399
H12	8	194974	362365
A1	9	148704	299538
A2	9	120300	280033
A3	9	117193	276351
A4	9	109652	251055
A5	9	108191	252918
A6	9	89364.6	254385
A7	9	111195	257587
A8	9	124953	270173
A9	9	120175	287715
A10	9	121023	261476
A11	9	125072	307103
A12	9	129486	298888
B1	9	116335	251955
B2	9	131156	310433
B3	9	121652	299956
B4	9	125848	292064
B5	9	122221	309481
B6	9	101035	260537
B7	9	112377	259538
B8	9	116700	276421
B9	9	105213	259272
B10	9	96559.3	262939
B11	9	114245	301549
B12	9	100534	282023
C1	9	57965.1	273669
C2	9	116602	316696
C3	9	101515	314275
C4	9	111537	308798
C5	9	101979	283226
C6	9	93733	268278
C7	9	94866.6	244597
C8	9	108103	283633
C9	9	100479	277255
C10	9	105447	300391
C11	9	105862	308307
C12	9	123935	343256
D1	9	94861	293893
D2	9	87962.7	278117
D3	9	112563	297761
D4	9	103828	293061
D5	9	91749.7	263477
D6	9	91443	255028
D7	9	81672.1	228338
D8	9	101210	274287
D9	9	97388.8	277834
D10	9	89307.5	278234
D11	9	89046.1	312537
D12	9	125799	367940
E1	9	156064	332314
E2	9	168584	302998
E3	9	138974	296177
E4	9	148002	272288
E5	9	144834	274210
E6	9	155800	290725
E7	9	172710	326139
E8	9	147173	280327
E9	9	151468	297578
E10	9	133604	273103
E11	9	146530	293806
E12	9	130579	327196
F1	9	147343	338032
F2	9	152401	329780
F3	9	165167	293414
F4	9	146384	299446
F5	9	157925	305556
F6	9	155071	321224
F7	9	160169	323319
F8	9	169125	323936
F9	9	148471	318262
F10	9	146035	318234
F11	9	122417	263159
F12	9	131014	317496
G1	9	106430	315284
G2	9	131957	300781
G3	9	129467	284883
G4	9	128535	300361
G5	9	134244	302438
G6	9	132844	300551
G7	9	153565	339056
G8	9	150603	338427
G9	9	138496	306994
G10	9	133043	301971
G11	9	194278	342769
G12	9	123302	281276
H1	9	121382	294527
H2	9	118783	308195
H3	9	111493	326486
H4	9	128046	310378
H5	9	126873	296373
H6	9	156033	350361
H7	9	137276	293777
H8	9	140998	328987
H9	9	133501	333426
H10	9	131906	322618
H11	9	153052	374484
H12	9	195293	362269
A1	10	146234	299330
A2	10	119242	279556
A3	10	118416	277170
A4	10	109769	252134
A5	10	107679	253561
A6	10	89137.2	255206
A7	10	110528	257868
A8	10	124254	270352
A9	10	120251	287757
A10	10	121749	261849
A11	10	124908	306831
A12	10	129893	298887
B1	10	116513	252165
B2	10	131475	311248
B3	10	121419	300029
B4	10	126735	292512
B5	10	122633	309164
B6	10	101916	261071
B7	10	113685	259984
B8	10	117614	276816
B9	10	105754	259051
B10	10	96147.3	263310
B11	10	115543	301290
B12	10	100412	282574
C1	10	57976.6	273866
C2	10	117515	317582
C3	10	101137	314427
C4	10	112488	308988
C5	10	102652	283458
C6	10	93644.1	268392
C7	10	94621.1	244622
C8	10	108262	283544
C9	10	100575	277144
C10	10	106681	300408
C11	10	105280	308647
C12	10	122982	344127
D1	10	95280	294418
D2	10	87537.8	278567
D3	10	113329	298500
D4	10	105167	292183
D5	10	92198.2	263705
D6	10	91628.9	254944
D7	10	81765.2	228446
D8	10	101547	274933
D9	10	97255.4	276184
D10	10	89511.1	278228
D11	10	89639.6	312596
D12	10	124331	366918
E1	10	156645	332591
E2	10	168568	302724
E3	10	139471	296296
E4	10	147088	272064
E5	10	144107	274489
E6	10	154877	290884
E7	10	172006	325825
E8	10	146486	279858
E9	10	152169	297304
E10	10	132906	273139
E11	10	146387	293637
E12	10	130670	327115
F1	10	146594	338908
F2	10	152703	329958
F3	10	164963	293767
F4	10	146825	299358
F5	10	158690	305401
F6	10	154851	320416
F7	10	160103	323538
F8	10	169059	323569
F9	10	148208	318039
F10	10	145621	318643
F11	10	122862	263587
F12	10	131572	317115
G1	10	105815	315623
G2	10	132103	301649
G3	10	129748	285185
G4	10	128187	300054
G5	10	134636	302666
G6	10	132947	300713
G7	10	153715	338445
G8	10	150793	338270
G9	10	139479	306408
G10	10	134199	301751
G11	10	194899	343419
G12	10	124131	281998
H1	10	121441	294092
H2	10	119381	308246
H3	10	111231	326534
H4	10	129192	310422
H5	10	127313	296186
H6	10	156636	349705
H7	10	137520	294117
H8	10	141258	329235
H9	10	133919	333821
H10	10	131790	322837
H11	10	152611	374083
H12	10	195522	362954
A1	11	146764	299430
A2	11	120481	280152
A3	11	117780	277587
A4	11	109639	251814
A5	11	108350	253439
A6	11	89076.1	255066
A7	11	112096	258527
A8	11	124477	270429
A9	11	120078	286867
A10	11	121286	261966
A11	11	125610	307547
A12	11	129008	299284
B1	11	116710	252180
B2	11	131375	310848
B3	11	121332	300770
B4	11	125648	292564
B5	11	122686	309458
B6	11	102080	261397
B7	11	113727	260171
B8	11	117335	277338
B9	11	105881	259398
B10	11	96446.7	263499
B11	11	114724	302086
B12	11	100676	282645
C1	11	57790	273602
C2	11	116509	317900
C3	11	102813	314852
C4	11	111997	309557
C5	11	102632	284403
C6	11	94722.3	268439
C7	11	94367.7	245207
C8	11	108915	283634
C9	11	100919	278277
C10	11	106079	301755
C11	11	105960	309166
C12	11	123403	343755
D1	11	95584.8	294392
D2	11	88325.4	278678
D3	11	112348	298276
D4	11	103921	292726
D5	11	93156.5	264120
D6	11	92014.9	255070
D7	11	81841.5	228281
D8	11	101972	274776
D9	11	97518	277785
D10	11	89427.6	278582
D11	11	89543	313299
D12	11	125692	368610
E1	11	155901	332386
E2	11	170094	302418
E3	11	140547	296377
E4	11	147664	272163
E5	11	144843	273757
E6	11	155208	290189
E7	11	172468	325354
E8	11	146951	280210
E9	11	151957	298119
E10	11	132719	273808
E11	11	146560	294032
E12	11	130736	327036
F1	11	147898	338717
F2	11	152946	331011
F3	11	166294	294071
F4	11	146619	299454
F5	11	159201	306287
F6	11	155068	320666
F7	11	160650	323211
F8	11	169768	323986
F9	11	147912	318802
F10	11	146805	319162
F11	11	122059	263945
F12	11	132665	317602
G1	11	106335	315608
G2	11	131866	301800
G3	11	130401	285610
G4	11	128536	301547
G5	11	133927	302310
G6	11	132845	300804
G7	11	153784	339435
G8	11	151154	338980
G9	11	139154	306198
G10	11	133925	302673
G11	11	195059	343755
G12	11	122415	282295
H1	11	122829	294197
H2	11	120196	308320
H3	11	111618	326403
H4	11	129104	309842
H5	11	127467	296242
H6	11	156188	350103
H7	11	137974	294125
H8	11	141643	329604
H9	11	133843	333291
H10	11	132587	322892
H11	11	153126	373497
H12	11	195930	362681
A1	12	148110	299529
A2	12	120023	281108
A3	12	118840	277520
A4	12	109658	252078
A5	12	108940	253892
A6	12	89363.9	255575
A7	12	112072	258590
A8	12	125678	271017
A9	12	120220	287880
A10	12	121858	262006
A11	12	125306	307845
A12	12	130204	299050
B1	12	117000	252336
B2	12	131546	310646
B3	12	121765	301020
B4	12	126645	293571
B5	12	124339	310229
B6	12	101733	261103
B7	12	113443	260206
B8	12	116926	276995
B9	12	105846	259126
B10	12	96449.4	263830
B11	12	115705	302702
B12	12	101016	282670
C1	12	58248.9	274157
C2	12	118199	317505
C3	12	102975	314968
C4	12	112547	309135
C5	12	103172	284317
C6	12	93781.1	269205
C7	12	95166.1	245681
C8	12	108645	283988
C9	12	100765	277814
C10	12	105847	301179
C11	12	105661	308975
C12	12	123118	343679
D1	12	96297.4	294715
D2	12	89145.8	278332
D3	12	113383	298347
D4	12	104237	293350
D5	12	93142.9	263296
D6	12	92445.4	255523
D7	12	82266	228901
D8	12	102213	275110
D9	12	97660.8	277686
D10	12	89541.2	278839
D11	12	88759.6	313354
D12	12	125028	368396
E1	12	157639	333023
E2	12	169885	303203
E3	12	140571	296896
E4	12	147983	272325
E5	12	144924	273787
E6	12	156033	291077
E7	12	173163	326236
E8	12	147274	281749
E9	12	151164	297931
E10	12	133197	273169
E11	12	145570	293707
E12	12	130577	327180
F1	12	148278	339061
F2	12	153023	330241
F3	12	166232	294158
F4	12	146527	298825
F5	12	159463	306108
F6	12	155918	320345
F7	12	160261	323601
F8	12	169459	323754
F9	12	148557	319131
F10	12	145379	318970
F11	12	122828	264463
F12	12	132214	317882
G1	12	107615	315909
G2	12	133746	302751
G3	12	130870	285698
G4	12	128518	302121
G5	12	135471	303643
G6	12	132923	300620
G7	12	154209	339203
G8	12	150544	339240
G9	12	139775	307267
G10	12	134942	302618
G11	12	197340	343221
G12	12	123085	281897
H1	12	122845	294285
H2	12	121375	309395
H3	12	111848	326887
H4	12	130173	310731
H5	12	127848	296185
H6	12	157216	350620
H7	12	138282	294326
H8	12	142530	329822
H9	12	134953	334023
H10	12	132477	323509
H11	12	152332	374380
H12	12	195422	363337
A1	13	149385	300133
A2	13	121293	280540
A3	13	118079	278080
A4	13	109794	252637
A5	13	107511	253546
A6	13	88916.5	255886
A7	13	111996	258961
A8	13	124834	272036
A9	13	120710	288446
A10	13	122057	262416
A11	13	125884	307883
A12	13	131102	299423
B1	13	116572	251866
B2	13	131220	311546
B3	13	121831	301115
B4	13	127572	293078
B5	13	122945	310212
B6	13	101835	261612
B7	13	114116	260171
B8	13	117434	277337
B9	13	106228	260222
B10	13	96451.6	264155
B11	13	114855	302275
B12	13	101509	282539
C1	13	58159.1	274500
C2	13	117260	318307
C3	13	102871	314852
C4	13	112866	309684
C5	13	103648	284704
C6	13	94167	269665
C7	13	95390.6	245532
C8	13	109216	284074
C9	13	100194	277998
C10	13	106729	300633
C11	13	105858	308664
C12	13	123727	344360
D1	13	95778.7	294767
D2	13	88046.5	278946
D3	13	113555	298368
D4	13	104471	292997
D5	13	93456	264079
D6	13	91679.4	255679
D7	13	82199.8	228603
D8	13	102028	275519
D9	13	98173.5	277604
D10	13	89416.1	279022
D11	13	89464.8	313330
D12	13	125255	368061
E1	13	157379	333271
E2	13	169146	303512
E3	13	140842	296663
E4	13	148172	272793
E5	13	145148	274245
E6	13	155221	291136
E7	13	172170	326757
E8	13	146678	281420
E9	13	152631	298439
E10	13	133778	273029
E11	13	146334	293961
E12	13	131361	327340
F1	13	148082	339270
F2	13	152887	330507
F3	13	166081	294252
F4	13	146724	299178
F5	13	159637	306556
F6	13	155546	320967
F7	13	160777	323313
F8	13	169240	324004
F9	13	147698	318655
F10	13	145734	319339
F11	13	122276	264458
F12	13	132330	318508
G1	13	107792	316066
G2	13	133013	302427
G3	13	130937	285671
G4	13	128915	302772
G5	13	134773	303234
G6	13	133378	301542
G7	13	154824	339642
G8	13	151071	339003
G9	13	140374	306915
G10	13	135899	302772
G11	13	198050	343672
G12	13	123739	282374
H1	13	123520	293777
H2	13	122054	309616
H3	13	112771	327321
H4	13	130450	310795
H5	13	128414	297059
H6	13	158757	350503
H7	13	138234	294368
H8	13	142571	330642
H9	13	135062	333942
H10	13	132738	322953
H11	13	152279	375411
H12	13	195046	364254
A1	14	149705	300842
A2	14	121826	280546
A3	14	118588	278587
A4	14	111026	252563
A5	14	109367	254352
A6	14	89788.2	255604
A7	14	112677	259574
A8	14	125660	271746
A9	14	120726	288236
A10	14	122583	262307
A11	14	126598	308009
A12	14	130932	299573
B1	14	115636	251970
B2	14	131583	310739
B3	14	122237	300989
B4	14	128203	294361
B5	14	123998	310923
B6	14	102347	262034
B7	14	114324	260089
B8	14	117938	277852
B9	14	106441	260166
B10	14	96391.9	263706
B11	14	116091	302486
B12	14	101715	282479
C1	14	58583.3	274629
C2	14	118702	318328
C3	14	102548	315685
C4	14	112171	310538
C5	14	103295	284841
C6	14	94163	269786
C7	14	95864	245521
C8	14	108918	284522
C9	14	101346	278401
C10	14	106766	301312
C11	14	105705	308320
C12	14	123895	344437
D1	14	95876.1	294675
D2	14	88267.1	278602
D3	14	113624	298364
D4	14	105380	293794
D5	14	93637.6	264041
D6	14	92007.2	255346
D7	14	82981.7	228783
D8	14	102308	274679
D9	14	97821.4	278035
D10	14	89381	279677
D11	14	88999.4	314279
D12	14	124854	368148
E1	14	157635	333071
E2	14	170414	303803
E3	14	140927	297178
E4	14	148040	272433
E5	14	144865	274454
E6	14	154853	291024
E7	14	173117	326854
E8	14	146592	281352
E9	14	152116	298673
E10	14	133246	273699
E11	14	146383	294315
E12	14	130617	327335
F1	14	148248	338836
F2	14	153514	331023
F3	14	166524	293731
F4	14	146777	299519
F5	14	159235	306014
F6	14	155837	321395
F7	14	159671	322884
F8	14	169831	323205
F9	14	147345	318897
F10	14	145622	319515
F11	14	123149	264282
F12	14	132136	317738
G1	14	109359	315647
G2	14	133785	302636
G3	14	130851	285550
G4	14	128558	302310
G5	14	135377	303117
G6	14	133020	301455
G7	14	154664	340151
G8	14	152161	338633
G9	14	140935	307001
G10	14	137576	302545
G11	14	200261	344820
G12	14	125310	282110
H1	14	126905	294244
H2	14	125040	309189
H3	14	112284	327414
H4	14	131740	310633
H5	14	130000	297125
H6	14	160735	351092
H7	14	139245	294627
H8	14	143028	329095
H9	14	136042	334227
H10	14	132128	323704
H11	14	153081	374791
H12	14	196399	363051
A1	15	149379	300355
A2	15	123120	280600
A3	15	119673	278694
A4	15	110185	252470
A5	15	109210	254564
A6	15	90091.1	256191
A7	15	112620	259344
A8	15	126516	272153
A9	15	121356	289370
A10	15	123076	262439
A11	15	126611	308194
A12	15	131356	299655
B1	15	119101	252926
B2	15	130826	310897
B3	15	121749	301334
B4	15	127624	293591
B5	15	123642	310867
B6	15	101735	261516
B7	15	114348	260666
B8	15	118608	278120
B9	15	106733	260169
B10	15	96123.8	264160
B11	15	115488	303083
B12	15	102006	282949
C1	15	59021.3	274579
C2	15	119041	318536
C3	15	104435	314967
C4	15	112968	310128
C5	15	102948	284874
C6	15	94534.2	270076
C7	15	95946.4	245965
C8	15	108497	284395
C9	15	101265	278534
C10	15	107786	301970
C11	15	106361	309560
C12	15	124967	344548
D1	15	95927.6	294931
D2	15	89048.3	278927
D3	15	113822	298744
D4	15	105914	293669
D5	15	93765.5	264078
D6	15	92821.7	255447
D7	15	83155.9	229256
D8	15	103711	275594
D9	15	98115.8	277732
D10	15	90335.2	279306
D11	15	89216.2	313796
D12	15	124930	368919
E1	15	157495	333463
E2	15	171838	304230
E3	15	141377	297412
E4	15	148098	272091
E5	15	145871	275520
E6	15	154874	291019
E7	15	173240	325518
E8	15	146860	281500
E9	15	152750	298728
E10	15	132883	273781
E11	15	147163	293997
E12	15	131560	327559
F1	15	148633	339395
F2	15	153476	330686
F3	15	166215	294552
F4	15	147615	299714
F5	15	159047	306338
F6	15	156037	320946
F7	15	160166	322470
F8	15	170128	323979
F9	15	147720	318708
F10	15	146147	319401
F11	15	122627	264760
F12	15	132147	318719
G1	15	109530	316728
G2	15	133783	302437
G3	15	131643	286149
G4	15	128754	302418
G5	15	135028	303574
G6	15	133123	300604
G7	15	155809	339492
G8	15	152714	339861
G9	15	141853	307494
G10	15	141069	302830
G11	15	202315	343557
G12	15	127233	282166
H1	15	130381	294195
H2	15	128928	310397
H3	15	115620	327238
H4	15	134726	311591
H5	15	132114	296574
H6	15	164256	350035
H7	15	140654	294454
H8	15	145185	330086
H9	15	137354	333613
H10	15	132114	323798
H11	15	152768	375188
H12	15	195922	363419
A1	16	150904	300344
A2	16	123634	281637
A3	16	120523	278823
A4	16	111250	252572
A5	16	108992	254634
A6	16	89832.1	256136
A7	16	112613	260058
A8	16	126237	272234
A9	16	120585	288515
A10	16	123028	262110
A11	16	127587	308084
A12	16	132667	300901
B1	16	119308	253051
B2	16	131577	311317
B3	16	121461	301110
B4	16	128433	294359
B5	16	123929	310984
B6	16	102289	262161
B7	16	114233	260173
B8	16	118998	277702
B9	16	106251	259738
B10	16	96920.6	264081
B11	16	115533	302549
B12	16	101086	283700
C1	16	59560.7	274910
C2	16	118454	318953
C3	16	104441	315709
C4	16	113114	310387
C5	16	103030	285135
C6	16	95314.5	269980
C7	16	95748.4	246475
C8	16	109691	284734
C9	16	101266	279007
C10	16	107705	301516
C11	16	106853	308995
C12	16	124797	344735
D1	16	95801.2	295582
D2	16	88988.9	279032
D3	16	114080	298802
D4	16	105315	294020
D5	16	93535.6	264370
D6	16	92636.7	256084
D7	16	82812.3	229388
D8	16	103173	275590
D9	16	98267.7	278229
D10	16	89833.4	279209
D11	16	88976.3	313892
D12	16	124402	369089
E1	16	157871	333857
E2	16	169973	304155
E3	16	141363	297546
E4	16	148367	272942
E5	16	145438	276314
E6	16	155729	291006
E7	16	172300	326738
E8	16	147021	281496
E9	16	152594	298311
E10	16	133359	273523
E11	16	146670	294503
E12	16	131318	327777
F1	16	148755	339930
F2	16	152614	331317
F3	16	167354	294727
F4	16	147063	300293
F5	16	159419	306589
F6	16	156031	321454
F7	16	160357	323000
F8	16	169451	323857
F9	16	146714	317982
F10	16	145391	319349
F11	16	122974	264613
F12	16	132486	318288
G1	16	113559	316285
G2	16	136042	303229
G3	16	133874	285934
G4	16	129531	302928
G5	16	135922	303796
G6	16	133688	301023
G7	16	158106	340378
G8	16	155107	340065
G9	16	144292	308648
G10	16	146947	303165
G11	16	208431	343284
G12	16	131484	282669
H1	16	137391	295754
H2	16	137733	310674
H3	16	118935	328029
H4	16	138652	311328
H5	16	137294	297317
H6	16	171376	351184
H7	16	144131	294590
H8	16	148582	330767
H9	16	140704	335169
H10	16	131048	324104
H11	16	153355	375840
H12	16	195715	363132
A1	17	153854	300940
A2	17	124603	281351
A3	17	121666	278837
A4	17	111598	253036
A5	17	109836	254700
A6	17	90632.9	256186
A7	17	113226	259784
A8	17	127019	272208
A9	17	122246	288708
A10	17	124238	262676
A11	17	128197	308832
A12	17	132453	299049
B1	17	119655	252870
B2	17	132161	311030
B3	17	122480	301306
B4	17	128158	293980
B5	17	124854	311222
B6	17	102256	261998
B7	17	114834	260853
B8	17	118301	278021
B9	17	106412	260358
B10	17	96948.5	264127
B11	17	115546	303668
B12	17	101084	283085
C1	17	60922.2	274726
C2	17	120396	319052
C3	17	105878	315877
C4	17	113067	310020
C5	17	103553	285924
C6	17	94617.7	270148
C7	17	97374	246110
C8	17	110583	285552
C9	17	101841	279502
C10	17	107886	302118
C11	17	106720	308815
C12	17	125535	343804
D1	17	95842.8	295512
D2	17	89620.5	279178
D3	17	114642	298751
D4	17	106572	293884
D5	17	93995.4	263783
D6	17	92682.8	254989
D7	17	83121.9	229353
D8	17	102877	275288
D9	17	99121.6	278098
D10	17	89933.9	279800
D11	17	90035.6	314982
D12	17	125281	368847
E1	17	157417	334285
E2	17	171055	304469
E3	17	142057	297947
E4	17	147992	272989
E5	17	146062	276412
E6	17	155735	291162
E7	17	172551	326447
E8	17	147372	282436
E9	17	153245	298807
E10	17	133731	274151
E11	17	147242	294209
E12	17	130868	327717
F1	17	149447	339693
F2	17	154104	330872
F3	17	167099	294338
F4	17	147114	300569
F5	17	159635	306437
F6	17	156179	320991
F7	17	160557	323637
F8	17	169351	323996
F9	17	147097	318465
F10	17	145541	319237
F11	17	122429	265475
F12	17	131723	318312
G1	17	117511	317317
G2	17	139505	302988
G3	17	136338	286598
G4	17	130260	303163
G5	17	136951	303790
G6	17	135767	301019
G7	17	161146	340445
G8	17	158277	339793
G9	17	146447	307079
G10	17	159298	303609
G11	17	220221	344169
G12	17	140242	281412
H1	17	154814	294832
H2	17	155043	310284
H3	17	126828	327272
H4	17	148013	311236
H5	17	148581	296805
H6	17	183474	350981
H7	17	150037	294858
H8	17	154826	329909
H9	17	146380	334421
H10	17	132682	324045
H11	17	152855	374961
H12	17	195951	363562
A1	18	156758	300792
A2	18	127632	280822
A3	18	125511	279441
A4	18	111254	253025
A5	18	110783	254854
A6	18	90962.8	256046
A7	18	113217	260219
A8	18	127429	272654
A9	18	121405	289294
A10	18	125674	262560
A11	18	128899	307988
A12	18	133369	300092
B1	18	119284	252962
B2	18	132788	310684
B3	18	122577	301869
B4	18	128735	293939
B5	18	124105	311268
B6	18	102936	261849
B7	18	114845	261086
B8	18	118227	278487
B9	18	106712	260684
B10	18	96541.4	263839
B11	18	114965	303203
B12	18	101711	283533
C1	18	61682.1	275318
C2	18	121465	319594
C3	18	108287	316263
C4	18	112971	311014
C5	18	103969	285592
C6	18	95751.8	270006
C7	18	97849.2	246207
C8	18	111783	284636
C9	18	102892	278865
C10	18	107816	301988
C11	18	108051	308395
C12	18	126160	344025
D1	18	96915.6	295859
D2	18	89815.6	278823
D3	18	114684	299326
D4	18	106526	294004
D5	18	94759.3	263884
D6	18	92861.4	255825
D7	18	84251.8	228965
D8	18	104827	275183
D9	18	99646.6	277907
D10	18	90388.3	279752
D11	18	90155.1	314627
D12	18	125490	368936
E1	18	158274	334301
E2	18	172252	303965
E3	18	142597	297587
E4	18	149248	273582
E5	18	146851	276956
E6	18	156560	291152
E7	18	173914	326487
E8	18	146977	281610
E9	18	153638	299099
E10	18	133423	274043
E11	18	146310	294093
E12	18	131261	327766
F1	18	148850	339754
F2	18	154468	331191
F3	18	166831	294327
F4	18	148012	299670
F5	18	159619	306798
F6	18	156039	321291
F7	18	160815	323415
F8	18	171610	323825
F9	18	147334	318859
F10	18	145538	319559
F11	18	123127	264924
F12	18	132309	319017
G1	18	126483	316818
G2	18	147447	302594
G3	18	141350	285794
G4	18	131614	302953
G5	18	138503	303619
G6	18	137596	301469
G7	18	168454	340448
G8	18	166162	339933
G9	18	153209	307925
G10	18	182371	302530
G11	18	241938	344326
G12	18	157110	281756
H1	18	182543	295317
H2	18	186481	310246
H3	18	142352	327185
H4	18	165580	311428
H5	18	167254	297262
H6	18	208290	350235
H7	18	162049	294462
H8	18	167365	330041
H9	18	158191	334408
H10	18	132872	323562
H11	18	153948	375255
H12	18	195872	362927
A1	19	164021	301600
A2	19	133595	281093
A3	19	130926	278962
A4	19	111947	253545
A5	19	111214	255444
A6	19	92228.3	256594
A7	19	114249	260421
A8	19	127676	272796
A9	19	122190	289193
A10	19	127633	262729
A11	19	131366	307332
A12	19	136314	299989
B1	19	120815	252958
B2	19	132960	310697
B3	19	123076	301706
B4	19	128196	293822
B5	19	125166	311307
B6	19	102527	261410
B7	19	115136	261154
B8	19	118860	278649
B9	19	107065	260708
B10	19	96302.6	264096
B11	19	114812	303491
B12	19	102303	283482
C1	19	63941.5	275305
C2	19	124848	319281
C3	19	112007	315917
C4	19	113663	311120
C5	19	104341	285244
C6	19	96507.5	270312
C7	19	99784.6	246441
C8	19	115910	285271
C9	19	104023	279106
C10	19	109332	301757
C11	19	107856	308760
C12	19	125921	343817
D1	19	97166.2	295760
D2	19	90551.3	279093
D3	19	115270	299226
D4	19	108930	293430
D5	19	96244.6	264238
D6	19	94095.2	255746
D7	19	85045.6	229170
D8	19	104924	275273
D9	19	101568	277924
D10	19	91366.8	280005
D11	19	92038.4	315282
D12	19	124794	369058
E1	19	158410	334431
E2	19	171877	304014
E3	19	142187	297696
E4	19	148819	273685
E5	19	147451	277357
E6	19	156875	291722
E7	19	173415	326547
E8	19	147614	281750
E9	19	154108	299219
E10	19	134712	273919
E11	19	147158	294858
E12	19	131632	328253
F1	19	148097	340395
F2	19	153724	331453
F3	19	166805	295060
F4	19	148031	299990
F5	19	158913	306381
F6	19	156415	322105
F7	19	161524	323627
F8	19	169535	324577
F9	19	146530	318353
F10	19	145660	319967
F11	19	122396	265040
F12	19	131947	319003
G1	19	145223	317475
G2	19	159778	303048
G3	19	150287	286097
G4	19	135202	304109
G5	19	141446	303740
G6	19	140200	301891
G7	19	181221	340310
G8	19	177651	339959
G9	19	167346	307695
G10	19	224865	302686
G11	19	283194	343981
G12	19	186399	281604
H1	19	233806	294309
H2	19	243380	310449
H3	19	170368	328590
H4	19	199009	311659
H5	19	203136	297375
H6	19	254497	351353
H7	19	183208	295056
H8	19	190632	330667
H9	19	179053	334738
H10	19	133117	324221
H11	19	155343	376053
H12	19	198076	363684
A1	20	177786	300708
A2	20	146871	281042
A3	20	141640	279929
A4	20	113693	253474
A5	20	113193	255487
A6	20	93728	256674
A7	20	114759	260930
A8	20	128324	272866
A9	20	124032	289354
A10	20	133010	262522
A11	20	136359	308452
A12	20	140609	300063
B1	20	121190	252555
B2	20	134665	310758
B3	20	123749	301330
B4	20	129313	293437
B5	20	125109	311360
B6	20	103428	262457
B7	20	114919	260765
B8	20	119888	277976
B9	20	107292	260654
B10	20	96658.5	263916
B11	20	116951	303155
B12	20	101573	284061
C1	20	68206.7	275551
C2	20	129934	319168
C3	20	119876	316121
C4	20	114700	311053
C5	20	105826	285410
C6	20	97717.3	271019
C7	20	103946	245581
C8	20	122626	285204
C9	20	105836	279054
C10	20	110686	302132
C11	20	109414	308699
C12	20	127762	344223
D1	20	97925.7	295666
D2	20	92123.8	279094
D3	20	116313	299322
D4	20	111688	293376
D5	20	98936.1	264507
D6	20	95032.5	255758
D7	20	86949	229507
D8	20	107066	275233
D9	20	103095	278241
D10	20	92426.2	280515
D11	20	92780	315064
D12	20	125590	369768
E1	20	159727	334499
E2	20	173371	304618
E3	20	143136	298164
E4	20	150277	273572
E5	20	147827	277558
E6	20	157344	291614
E7	20	174878	326686
E8	20	148363	281372
E9	20	153956	299167
E10	20	134664	274066
E11	20	147605	294042
E12	20	132303	328114
F1	20	149019	340265
F2	20	153892	332073
F3	20	167621	295200
F4	20	147642	299676
F5	20	160175	306925
F6	20	156179	321422
F7	20	162211	323962
F8	20	171185	325195
F9	20	146660	318036
F10	20	144784	319079
F11	20	122698	265126
F12	20	132695	318864
G1	20	177109	318209
G2	20	183876	303064
G3	20	169897	285893
G4	20	141718	303868
G5	20	148371	304181
G6	20	146745	301368
G7	20	205609	340463
G8	20	203392	340791
G9	20	191372	308523
G10	20	299806	303172
G11	20	356292	343447
G12	20	241435	281110
H1	20	315625	295294
H2	20	332252	310370
H3	20	221453	327970
H4	20	258325	311745
H5	20	263914	296980
H6	20	332396	350510
H7	20	224262	295028
H8	20	234921	330265
H9	20	220092	334122
H10	20	135154	324218
H11	20	158026	376133
H12	20	201831	363427
A1	21	204612	301187
A2	21	170225	280873
A3	21	162889	279410
A4	21	116147	253997
A5	21	117593	255528
A6	21	96120.1	256448
A7	21	116323	261119
A8	21	129190	273216
A9	21	123838	289295
A10	21	142743	262827
A11	21	146154	308241
A12	21	147884	300180
B1	21	123449	252791
B2	21	135958	310600
B3	21	126356	302154
B4	21	130150	293900
B5	21	125248	311750
B6	21	103797	261987
B7	21	115990	261210
B8	21	119949	278165
B9	21	107452	260916
B10	21	97102.3	264310
B11	21	116125	303403
B12	21	102043	283838
C1	21	75700.2	274925
C2	21	140411	319410
C3	21	136907	316634
C4	21	115323	311371
C5	21	107525	285237
C6	21	100429	270819
C7	21	109535	246287
C8	21	135490	286056
C9	21	111036	279931
C10	21	112948	302160
C11	21	112861	309777
C12	21	131170	343719
D1	21	99449.4	295459
D2	21	94784.8	278510
D3	21	117023	299392
D4	21	117511	293701
D5	21	104177	264091
D6	21	97819.6	255841
D7	21	91135.8	229456
D8	21	111363	275430
D9	21	106910	277725
D10	21	93839.3	280818
D11	21	95964.4	314925
D12	21	126112	369510
E1	21	160113	335325
E2	21	173764	304457
E3	21	144254	297444
E4	21	152162	273344
E5	21	150700	277607
E6	21	159357	291398
E7	21	175804	326793
E8	21	149224	281144
E9	21	155910	299761
E10	21	134591	273843
E11	21	147709	294680
E12	21	132170	328063
F1	21	148271	339758
F2	21	154370	331892
F3	21	167360	294999
F4	21	148035	299924
F5	21	160383	305995
F6	21	156960	321365
F7	21	162042	323507
F8	21	171403	324635
F9	21	147699	318634
F10	21	145707	320009
F11	21	123240	264461
F12	21	132545	318772
G1	21	236177	317541
[truncated: 10,775 more rows]

## Sheet: Amplification Data
Block Type	96fast
Chemistry	SYBR_GREEN
Experiment File Name	S:\LQW\ZHB\2014.eds
Experiment Run End Time	2012-05-24 02:00:11 AM CST
Instrument Type	sds7500fast
Passive Reference	ROX
Well	Cycle	Target Name	Rn	ΔRn
A1	1	1651	0.484631	0.00144497
A1	2	1651	0.488312	0.00391209
A1	3	1651	0.486736	0.00112355
A1	4	1651	0.48951	0.00268368
A1	5	1651	0.493003	0.00496311
A1	6	1651	0.487605	-0.00164746
A1	7	1651	0.489509	-0.000957297
A1	8	1651	0.489245	-0.00243451
A1	9	1651	0.496445	0.00355248
A1	10	1651	0.488539	-0.00556732
A1	11	1651	0.490145	-0.00517438
A1	12	1651	0.494476	-0.00205678
A1	13	1651	0.497729	-1.70207e-05
A1	14	1651	0.497621	-0.00133792
A1	15	1651	0.497343	-0.00282955
A1	16	1651	0.502439	0.00105325
A1	17	1651	0.511245	0.00864617
A1	18	1651	0.52115	0.0173371
A1	19	1651	0.543838	0.0388122
A1	20	1651	0.591225	0.0849861
A1	21	1651	0.679353	0.1719
A1	22	1651	0.82179	0.313124
A1	23	1651	1.07295	0.563069
A1	24	1651	1.41681	0.905717
A1	25	1651	1.82123	1.30892
A1	26	1651	2.19198	1.67846
A1	27	1651	2.45592	1.94119
A1	28	1651	2.61889	2.10295
A1	29	1651	2.72787	2.21071
A1	30	1651	2.81639	2.29802
A1	31	1651	2.87655	2.35696
A1	32	1651	2.91959	2.39879
A1	33	1651	2.95755	2.43554
A1	34	1651	2.99702	2.4738
A1	35	1651	3.01442	2.48998
A1	36	1651	3.02068	2.49502
A1	37	1651	3.04293	2.51607
A1	38	1651	3.04918	2.5211
A1	39	1651	3.06221	2.53291
A1	40	1651	3.05825	2.52774
A2	1	1651	0.419886	0.000925248
A2	2	1651	0.42524	0.00509544
A2	3	1651	0.421341	1.13257e-05
A2	4	1651	0.423689	0.00117494
A2	5	1651	0.424984	0.00128501
A2	6	1651	0.424126	-0.00075676
A2	7	1651	0.427481	0.00141325
A2	8	1651	0.427273	2.10763e-05
A2	9	1651	0.42959	0.0011534
A2	10	1651	0.426542	-0.00307926
A2	11	1651	0.430057	-0.000749334
A2	12	1651	0.426965	-0.00502527
A2	13	1651	0.432357	-0.000818539
A2	14	1651	0.434247	-0.000112658
A2	15	1651	0.438773	0.00322855
A2	16	1651	0.438983	0.00225427
A2	17	1651	0.442872	0.00495869
A2	18	1651	0.454494	0.0153958
A2	19	1651	0.475268	0.0349855
A2	20	1651	0.522595	0.0811283
A2	21	1651	0.606058	0.163406
A2	22	1651	0.74863	0.304794
A2	23	1651	0.993336	0.548316
A2	24	1651	1.36688	0.920671
A2	25	1651	1.82035	1.37296
A2	26	1651	2.25057	1.802
A2	27	1651	2.59526	2.1455
A2	28	1651	2.78658	2.33564
A2	29	1651	2.918	2.46587
A2	30	1651	3.02996	2.57664
A2	31	1651	3.10064	2.64614
A2	32	1651	3.16002	2.70433
A2	33	1651	3.21458	2.75772
A2	34	1651	3.24068	2.78263
A2	35	1651	3.2669	2.80766
A2	36	1651	3.28711	2.82668
A2	37	1651	3.30975	2.84815
A2	38	1651	3.31635	2.85356
A2	39	1651	3.32079	2.85682
A2	40	1651	3.32834	2.86318
A3	1	1651	0.413705	-0.00291173
A3	2	1651	0.418586	0.00105818
A3	3	1651	0.416935	-0.00150413
A3	4	1651	0.420594	0.00124415
A3	5	1651	0.418657	-0.00160396
A3	6	1651	0.421223	5.13229e-05
A3	7	1651	0.421055	-0.00102808
A3	8	1651	0.426803	0.00380875
A3	9	1651	0.424072	0.00016667
A3	10	1651	0.427232	0.00241526
A3	11	1651	0.4243	-0.0014281
A3	12	1651	0.428222	0.00158331
A3	13	1651	0.424624	-0.00292644
A3	14	1651	0.425676	-0.00278469
A3	15	1651	0.429407	3.47584e-05
A3	16	1651	0.432254	0.0019712
A3	17	1651	0.436333	0.00513874
A3	18	1651	0.44915	0.0170442
A3	19	1651	0.469334	0.0363173
A3	20	1651	0.505983	0.0720555
A3	21	1651	0.582976	0.148137
A3	22	1651	0.718234	0.282484
A3	23	1651	0.950159	0.513498
A3	24	1651	1.30646	0.868886
A3	25	1651	1.767	1.32852
A3	26	1651	2.23477	1.79538
A3	27	1651	2.61784	2.17754
A3	28	1651	2.8459	2.40468
A3	29	1651	2.99327	2.55115
A3	30	1651	3.10604	2.663
A3	31	1651	3.18462	2.74067
A3	32	1651	3.23876	2.79389
A3	33	1651	3.29117	2.84539
A3	34	1651	3.32654	2.87985
A3	35	1651	3.3615	2.91391
A3	36	1651	3.37965	2.93114
A3	37	1651	3.39962	2.9502
A3	38	1651	3.415	2.96467
A3	39	1651	3.41798	2.96675
A3	40	1651	3.43072	2.97857
A4	1	1651	0.429959	-0.00712999
A4	2	1651	0.436669	-0.000603059
A4	3	1651	0.443317	0.00586224
A4	4	1651	0.437211	-0.000426213
A4	5	1651	0.440246	0.00242562
A4	6	1651	0.438905	0.000901659
A4	7	1651	0.438588	0.000401979
A4	8	1651	0.43945	0.00108169
A4	9	1651	0.436767	-0.00178465
A4	10	1651	0.435361	-0.00337313
A4	11	1651	0.435399	-0.00351777
A4	12	1651	0.435015	-0.00408466
A4	13	1651	0.434594	-0.00468835
A4	14	1651	0.439596	0.000130821
A4	15	1651	0.436429	-0.00321832
A4	16	1651	0.44047	0.000640023
A4	17	1651	0.441035	0.00102184
A4	18	1651	0.439694	-0.000501794
A4	19	1651	0.441529	0.00115046
A4	20	1651	0.44854	0.00797855
A4	21	1651	0.457276	0.0165321
A4	22	1651	0.476342	0.0354149
A4	23	1651	0.514729	0.0736192
A4	24	1651	0.577076	0.135783
A4	25	1651	0.705092	0.263617
A4	26	1651	0.916766	0.475108
A4	27	1651	1.25273	0.810889
A4	28	1651	1.69669	1.25467
A4	29	1651	2.13898	1.69678
A4	30	1651	2.48583	2.04344
A4	31	1651	2.71884	2.27627
A4	32	1651	2.8656	2.42284
A4	33	1651	2.96618	2.52325
A4	34	1651	3.06825	2.62513
A4	35	1651	3.12977	2.68647
A4	36	1651	3.19351	2.75003
A4	37	1651	3.22706	2.78339
A4	38	1651	3.26868	2.82483
A4	39	1651	3.28649	2.84245
A4	40	1651	3.3201	2.87588
A5	1	1651	0.422255	-0.00260906
A5	2	1651	0.425197	-3.51525e-05
A5	3	1651	0.427463	0.0018629
A5	4	1651	0.42647	0.000501322
A5	5	1651	0.429353	0.00301622
A5	6	1651	0.428524	0.00181886
A5	7	1651	0.426161	-0.000912376
A5	8	1651	0.425915	-0.00152672
A5	9	1651	0.42777	-3.94631e-05
A5	10	1651	0.424668	-0.00350926
A5	11	1651	0.427518	-0.00102806
A5	12	1651	0.429081	0.000166923
A5	13	1651	0.42403	-0.0052526
A5	14	1651	0.429983	0.000332746
A5	15	1651	0.429009	-0.00100976
A5	16	1651	0.428034	-0.00235319
A5	17	1651	0.431235	0.000479706
A5	18	1651	0.434692	0.00356899
A5	19	1651	0.435375	0.00388376
A5	20	1651	0.443046	0.0111862
A5	21	1651	0.460197	0.0279693
A5	22	1651	0.490215	0.0576188
A5	23	1651	0.543629	0.110665
A5	24	1651	0.647157	0.213824
A5	25	1651	0.839739	0.406038
A5	26	1651	1.14514	0.711072
A5	27	1651	1.57703	1.14259
A5	28	1651	2.07289	1.63808
A5	29	1651	2.50754	2.07236
A5	30	1651	2.8061	2.37056
A5	31	1651	2.98606	2.55015
A5	32	1651	3.10358	2.6673
A5	33	1651	3.21268	2.77603
A5	34	1651	3.27794	2.84092
A5	35	1651	3.33898	2.90159
A5	36	1651	3.3765	2.93875
A5	37	1651	3.40527	2.96716
A5	38	1651	3.4317	2.99321
A5	39	1651	3.4508	3.01194
A5	40	1651	3.4521	3.01288
A6	1	1651	0.348322	0.000654176
A6	2	1651	0.348966	0.000845994
A6	3	1651	0.348449	-0.000121975
A6	4	1651	0.351386	0.00236301
A6	5	1651	0.351352	0.00187754
A6	6	1651	0.353354	0.00342796
A6	7	1651	0.351787	0.00140985
A6	8	1651	0.352813	0.00198403
A6	9	1651	0.351297	1.58922e-05
A6	10	1651	0.349275	-0.0024573
A6	11	1651	0.349229	-0.00295532
A6	12	1651	0.349658	-0.00297733
A6	13	1651	0.347486	-0.00560142
A6	14	1651	0.351278	-0.00226009
A6	15	1651	0.351656	-0.00233447
A6	16	1651	0.35072	-0.00372187
A6	17	1651	0.353778	-0.00111511
A6	18	1651	0.355259	-8.60292e-05
A6	19	1651	0.359433	0.00363692
A6	20	1651	0.365164	0.00891572
A6	21	1651	0.374813	0.0181133
A6	22	1651	0.397943	0.0407919
A6	23	1651	0.449936	0.0923328
A6	24	1651	0.53735	0.179296
A6	25	1651	0.691793	0.333287
A6	26	1651	0.959871	0.600913
A6	27	1651	1.36524	1.00583
A6	28	1651	1.85615	1.49628
A6	29	1651	2.32931	1.969
A6	30	1651	2.68415	2.32338
A6	31	1651	2.8974	2.53619
A6	32	1651	3.03969	2.67802
A6	33	1651	3.14279	2.78067
A6	34	1651	3.23089	2.86832
A6	35	1651	3.28965	2.92663
A6	36	1651	3.34152	2.97805
A6	37	1651	3.37463	3.01071
A6	38	1651	3.40671	3.04233
A6	39	1651	3.42211	3.05728
A6	40	1651	3.43993	3.07466
A7	1	1651	0.421719	-0.00472885
A7	2	1651	0.42825	0.0012188
A7	3	1651	0.425912	-0.00170216
A7	4	1651	0.432176	0.00397798
A7	5	1651	0.429575	0.000792942
A7	6	1651	0.429609	0.000243859
A7	7	1651	0.429912	-3.7151e-05
A7	8	1651	0.428588	-0.0019451
A7	9	1651	0.431678	0.000561927
A7	10	1651	0.428624	-0.00307596
A7	11	1651	0.433595	0.00131139
A7	12	1651	0.433397	0.000529877
A7	13	1651	0.432481	-0.000969423
A7	14	1651	0.434084	4.99017e-05
A7	15	1651	0.434248	-0.000370524
A7	16	1651	0.433029	-0.00217229
A7	17	1651	0.435845	6.01111e-05
A7	18	1651	0.435085	-0.0012838
A7	19	1651	0.43871	0.00175752
A7	20	1651	0.439807	0.00227089
A7	21	1651	0.445478	0.00735803
A7	22	1651	0.456342	0.0176383
A7	23	1651	0.471507	0.0322202
A7	24	1651	0.511407	0.0715366
A7	25	1651	0.572381	0.131926
A7	26	1651	0.694513	0.253475
A7	27	1651	0.907918	0.466296
A7	28	1651	1.23861	0.796403
A7	29	1651	1.68317	1.24038
A7	30	1651	2.16587	1.7225
A7	31	1651	2.55106	2.10711
A7	32	1651	2.78763	2.34309
A7	33	1651	2.93443	2.4893
A7	34	1651	3.0584	2.61269
A7	35	1651	3.15302	2.70673
A7	36	1651	3.21498	2.76811
A7	37	1651	3.2644	2.81695
A7	38	1651	3.29903	2.85098
A7	39	1651	3.32956	2.88094
A7	40	1651	3.34977	2.90056
A8	1	1651	0.450987	-0.00534093
A8	2	1651	0.455175	-0.00174075
A8	3	1651	0.459223	0.00171879
A8	4	1651	0.459988	0.001896
A8	5	1651	0.458823	0.000142696
A8	6	1651	0.460188	0.000919524
A8	7	1651	0.459628	-0.000228312
A8	8	1651	0.458904	-0.00154084
A8	9	1651	0.462491	0.00145859
A8	10	1651	0.459602	-0.00201889
A8	11	1651	0.460294	-0.00191503
A8	12	1651	0.463729	0.000932283
A8	13	1651	0.458887	-0.00449752
A8	14	1651	0.462416	-0.00155675
A8	15	1651	0.464872	0.000310579
A8	16	1651	0.463706	-0.0014429
A8	17	1651	0.466623	0.000886152
A8	18	1651	0.467365	0.00103931
A8	19	1651	0.468029	0.00111512
A8	20	1651	0.470283	0.00278119
A8	21	1651	0.472851	0.00476117
A8	22	1651	0.48339	0.0147118
A8	23	1651	0.501206	0.0319398
A8	24	1651	0.526302	0.0564478
A8	25	1651	0.581995	0.111553
A8	26	1651	0.679935	0.208905
A8	27	1651	0.865163	0.393545
A8	28	1651	1.16182	0.689613
A8	29	1651	1.59021	1.11741
A8	30	1651	2.07853	1.60515
A8	31	1651	2.52085	2.04688
A8	32	1651	2.79792	2.32336
A8	33	1651	2.97327	2.49813
A8	34	1651	3.0999	2.62417
A8	35	1651	3.19115	2.71483
A8	36	1651	3.26951	2.79259
A8	37	1651	3.32756	2.85007
A8	38	1651	3.36295	2.88487
A8	39	1651	3.39332	2.91464
A8	40	1651	3.4132	2.93394
A9	1	1651	0.414495	0.000701611
A9	2	1651	0.415902	0.00159251
A9	3	1651	0.418626	0.00380108
A9	4	1651	0.416697	0.00135582
A9	5	1651	0.415343	-0.000513758
A9	6	1651	0.415382	-0.000990014
A9	7	1651	0.418113	0.00122497
A9	8	1651	0.416954	-0.000449132
A9	9	1651	0.417688	-0.00023153
A9	10	1651	0.417891	-0.000544201
A9	11	1651	0.418582	-0.000368233
A9	12	1651	0.417604	-0.00186239
A9	13	1651	0.418483	-0.00149917
A9	14	1651	0.418843	-0.0016544
A9	15	1651	0.419382	-0.00163152
A9	16	1651	0.417949	-0.00358016
A9	17	1651	0.423424	0.0013797
A9	18	1651	0.419659	-0.00290115
A9	19	1651	0.42252	-0.000556436
A9	20	1651	0.428653	0.00506114
A9	21	1651	0.428067	0.00395939
A9	22	1651	0.436826	0.0122024
A9	23	1651	0.45207	0.0269314
A9	24	1651	0.483981	0.058326
A9	25	1651	0.539612	0.113442
A9	26	1651	0.640551	0.213865
A9	27	1651	0.82812	0.400919
A9	28	1651	1.1319	0.704184
A9	29	1651	1.56096	1.13273
A9	30	1651	2.05188	1.62314
A9	31	1651	2.47642	2.04716
A9	32	1651	2.74513	2.31535
A9	33	1651	2.91981	2.48952
A9	34	1651	3.04182	2.61101
A9	35	1651	3.13645	2.70512
A9	36	1651	3.20749	2.77565
A9	37	1651	3.26093	2.82857
A9	38	1651	3.30317	2.87029
A9	39	1651	3.33379	2.9004
A9	40	1651	3.36074	2.92684
A10	1	1651	0.443745	-0.00751102
A10	2	1651	0.451257	-0.00134596
A10	3	1651	0.450534	-0.00341556
A10	4	1651	0.457073	0.00177758
A10	5	1651	0.458861	0.00221853
A10	6	1651	0.458288	0.000299499
A10	7	1651	0.458907	-0.000427413
A10	8	1651	0.462793	0.0021121
A10	9	1651	0.462845	0.000817334
A10	10	1651	0.464958	0.00158352
A10	11	1651	0.462984	-0.00173658
A10	12	1651	0.465095	-0.00097162
A10	13	1651	0.465129	-0.00228412
A10	14	1651	0.467328	-0.00143222
A10	15	1651	0.46897	-0.0011362
A10	16	1651	0.469374	-0.00207891
A10	17	1651	0.47297	0.000170417
A10	18	1651	0.478649	0.00450364
A10	19	1651	0.485798	0.0103056
A10	20	1651	0.506661	0.0298222
A10	21	1651	0.543108	0.0649225
A10	22	1651	0.606169	0.126638
A10	23	1651	0.729729	0.248851
A10	24	1651	0.949677	0.467453
A10	25	1651	1.29088	0.807307
A10	26	1651	1.74387	1.25896
A10	27	1651	2.23961	1.75334
A10	28	1651	2.65589	2.16828
A10	29	1651	2.93742	2.44846
A10	30	1651	3.11219	2.62189
A10	31	1651	3.22691	2.73526
A10	32	1651	3.30859	2.81559
A10	33	1651	3.37433	2.87999
A10	34	1651	3.42585	2.93016
A10	35	1651	3.48193	2.98489
A10	36	1651	3.5084	3.01002
A10	37	1651	3.52559	3.02586
A10	38	1651	3.53472	3.03365
A10	39	1651	3.55502	3.0526
A10	40	1651	3.55992	3.05616
A11	1	1651	0.390729	-0.00756444
A11	2	1651	0.400831	0.00151729
A11	3	1651	0.401562	0.00122833
A11	4	1651	0.40187	0.000515843
A11	5	1651	0.400079	-0.00229571
A11	6	1651	0.404018	0.000623879
A11	7	1651	0.405385	0.00097066
A11	8	1651	0.406571	0.00113618
A11	9	1651	0.407263	0.00080827
A11	10	1651	0.407091	-0.00038397
A11	11	1651	0.408424	-7.18192e-05
A11	12	1651	0.407044	-0.0024718
A11	13	1651	0.408869	-0.00166663
A11	14	1651	0.411022	-0.000534615
A11	15	1651	0.410818	-0.00175904
A11	16	1651	0.414129	0.000532609
A11	17	1651	0.415103	0.000486208
A11	18	1651	0.418519	0.0028816
A11	19	1651	0.427441	0.010784
A11	20	1651	0.442076	0.0243987
A11	21	1651	0.474154	0.0554562
A11	22	1651	0.527095	0.107377
A11	23	1651	0.638876	0.218138
A11	24	1651	0.819564	0.397806
A11	25	1651	1.13052	0.707745
A11	26	1651	1.55383	1.13003
A11	27	1651	2.01791	1.59309
A11	28	1651	2.43185	2.00601
A11	29	1651	2.71171	2.28485
A11	30	1651	2.88248	2.4546
A11	31	1651	3.00833	2.57943
A11	32	1651	3.09456	2.66463
A11	33	1651	3.15911	2.72817
A11	34	1651	3.21415	2.78219
A11	35	1651	3.24892	2.81594
A11	36	1651	3.27999	2.84599
A11	37	1651	3.30381	2.86879
A11	38	1651	3.32282	2.88678
A11	39	1651	3.34177	2.90471
A11	40	1651	3.34282	2.90474
A12	1	1651	0.412263	-0.00968488
A12	2	1651	0.417847	-0.00537322
A12	3	1651	0.421246	-0.00324606
A12	4	1651	0.425252	-0.000512404
A12	5	1651	0.427705	0.000668167
A12	6	1651	0.429184	0.000874977
A12	7	1651	0.432208	0.00262662
A12	8	1651	0.433196	0.00234166
A12	9	1651	0.433227	0.00110005
A12	10	1651	0.434587	0.00118819
A12	11	1651	0.431054	-0.00361719
A12	12	1651	0.435392	-0.000551769
A12	13	1651	0.43785	0.000633988
A12	14	1651	0.437062	-0.0014265
A12	15	1651	0.438357	-0.00140357
A12	16	1651	0.4409	-0.000133506
A12	17	1651	0.442914	0.000608077
A12	18	1651	0.444428	0.000849279
A12	19	1651	0.454397	0.00954617
A12	20	1651	0.468599	0.0224759
A12	21	1651	0.492652	0.0452565
A12	22	1651	0.538559	0.0898908
A12	23	1651	0.62899	0.179049
A12	24	1651	0.785844	0.334631
A12	25	1651	1.03991	0.587421
A12	26	1651	1.40048	0.946718
A12	27	1651	1.81733	1.3623
A12	28	1651	2.18724	1.73094
A12	29	1651	2.4624	2.00483
A12	30	1651	2.63803	2.17919
A12	31	1651	2.7557	2.29558
A12	32	1651	2.85035	2.38896
A12	33	1651	2.92726	2.4646
A12	34	1651	2.99541	2.53148
A12	35	1651	3.02406	2.55885
A12	36	1651	3.06327	2.59679
A12	37	1651	3.08832	2.62057
A12	38	1651	3.13037	2.66134
A12	39	1651	3.12551	2.65521
A12	40	1651	3.14745	2.67588
B1	1	1651	0.448024	0.00324171
B1	2	1651	0.454409	0.00792277
B1	3	1651	0.45166	0.00347067
B1	4	1651	0.452471	0.00257831
B1	5	1651	0.452537	0.000941276
B1	6	1651	0.448559	-0.00473969
B1	7	1651	0.45472	-0.00028236
B1	8	1651	0.451472	-0.00523335
B1	9	1651	0.461731	0.0033215
B1	10	1651	0.462049	0.00193684
B1	11	1651	0.462806	0.000990832
B1	12	1651	0.463666	0.000146958
B1	13	1651	0.462835	-0.00238686
B1	14	1651	0.458928	-0.00799698
B1	15	1651	0.470891	0.00226244
B1	16	1651	0.471479	0.00114731
B1	17	1651	0.473187	0.00115125
B1	18	1651	0.471549	-0.00218976
B1	19	1651	0.477611	0.00216929
B1	20	1651	0.479857	0.00271233
B1	21	1651	0.488342	0.00949358
B1	22	1651	0.499263	0.0187109
B1	23	1651	0.523279	0.0410244
B1	24	1651	0.571799	0.0878405
B1	25	1651	0.66804	0.182378
B1	26	1651	0.826585	0.33922
B1	27	1651	1.07939	0.590317
B1	28	1651	1.43216	0.941387
B1	29	1651	1.80959	1.31712
B1	30	1651	2.1521	1.65792
B1	31	1651	2.38296	1.88708
B1	32	1651	2.51972	2.02213
B1	33	1651	2.61187	2.11258
B1	34	1651	2.6796	2.17861
B1	35	1651	2.73763	2.23494
B1	36	1651	2.77	2.2656
B1	37	1651	2.80955	2.30345
B1	38	1651	2.83823	2.33042
B1	39	1651	2.85909	2.34958
B1	40	1651	2.87877	2.36756
B2	1	1651	0.422767	0.0018091
B2	2	1651	0.426367	0.00512676
B2	3	1651	0.42679	0.00526794
B2	4	1651	0.426718	0.00491356
B2	5	1651	0.419082	-0.00300413
B2	6	1651	0.421746	-0.000622146
B2	7	1651	0.423024	0.000373735
B2	8	1651	0.42051	-0.00242243
B2	9	1651	0.422494	-0.000720593
B2	10	1651	0.422411	-0.00108599
B2	11	1651	0.422635	-0.00114431
B2	12	1651	0.423458	-0.000603481
B2	13	1651	0.421192	-0.00315133
B2	14	1651	0.423451	-0.0011743
B2	15	1651	0.4208	-0.00410714
B2	16	1651	0.422647	-0.00254299
B2	17	1651	0.424914	-0.000557731
B2	18	1651	0.427407	0.00165271
B2	19	1651	0.42794	0.0019044
B2	20	1651	0.433342	0.00702424
B2	21	1651	0.437727	0.0111267
B2	22	1651	0.447951	0.0210684
B2	23	1651	0.465318	0.0381534
B2	24	1651	0.51	0.0825532
B2	25	1651	0.58327	0.155542
B2	26	1651	0.721684	0.293673
B2	27	1651	0.951799	0.523507
B2	28	1651	1.29394	0.865369
B2	29	1651	1.71791	1.28905
B2	30	1651	2.12279	1.69365
B2	31	1651	2.43051	2.00109
B2	32	1651	2.62032	2.19062
B2	33	1651	2.74632	2.31633
B2	34	1651	2.82278	2.39251
B2	35	1651	2.90486	2.47431
B2	36	1651	2.94864	2.51781
B2	37	1651	2.9939	2.56278
B2	38	1651	3.01284	2.58145
B2	39	1651	3.03974	2.60806
B2	40	1651	3.05121	2.61925
B3	1	1651	0.398555	-0.00104832
B3	2	1651	0.401581	0.00153635
B3	3	1651	0.400829	0.000343791
B3	4	1651	0.401197	0.000270663
B3	5	1651	0.399614	-0.00175291
B3	6	1651	0.401073	-0.000734585
B3	7	1651	0.402602	0.000353803
B3	8	1651	0.403383	0.000694153
B3	9	1651	0.405567	0.00243792
B3	10	1651	0.40469	0.00112028
B3	11	1651	0.403405	-0.000605804
B3	12	1651	0.404508	5.69177e-05
B3	13	1651	0.4046	-0.000292269
B3	14	1651	0.406116	0.000783065
B3	15	1651	0.404032	-0.00174124
B3	16	1651	0.403377	-0.00283778
B3	17	1651	0.406498	-0.000157505
B3	18	1651	0.406061	-0.001035
B3	19	1651	0.407934	0.000397757
B3	20	1651	0.410676	0.00269874
B3	21	1651	0.418186	0.00976786
B3	22	1651	0.431552	0.0226935
B3	23	1651	0.456408	0.0471084
B3	24	1651	0.503026	0.0932864
B3	25	1651	0.593815	0.183634
B3	26	1651	0.758236	0.347614
B3	27	1651	1.03553	0.624469
B3	28	1651	1.44595	1.03444
B3	29	1651	1.95154	1.5396
B3	30	1651	2.42696	2.01458
B3	31	1651	2.78728	2.37446
B3	32	1651	2.99623	2.58296
B3	33	1651	3.13468	2.72097
B3	34	1651	3.2323	2.81815
B3	35	1651	3.30818	2.89359
B3	36	1651	3.3645	2.94947
B3	37	1651	3.40147	2.986
B3	38	1651	3.43389	3.01798
B3	39	1651	3.45743	3.04108
B3	40	1651	3.48149	3.0647
B4	1	1651	0.431177	0.00591386
B4	2	1651	0.426876	0.000793727
B4	3	1651	0.431732	0.00483066
B4	4	1651	0.430386	0.00266641
B4	5	1651	0.427498	-0.00104019
B4	6	1651	0.429046	-0.000310873
B4	7	1651	0.43056	0.000384295
B4	8	1651	0.431951	0.000955753
B4	9	1651	0.430892	-0.000921259
B4	10	1651	0.433264	0.000631709
B4	11	1651	0.429473	-0.00397859
B4	12	1651	0.431396	-0.00287418
B4	13	1651	0.435282	0.000193074
B4	14	1651	0.435531	-0.000376659
B4	15	1651	0.434701	-0.00202535
B4	16	1651	0.436316	-0.00122901
B4	17	1651	0.435941	-0.00242271
B4	18	1651	0.437966	-0.00121697
B4	19	1651	0.436304	-0.00369724
B4	20	1651	0.440685	-0.000135031
B4	21	1651	0.442837	0.00119749
B4	22	1651	0.442436	-2.19048e-05
B4	23	1651	0.452667	0.00939059
B4	24	1651	0.459815	0.0157196
B4	25	1651	0.484052	0.0391377
B4	26	1651	0.528851	0.0831184
B4	27	1651	0.60831	0.161758
B4	28	1651	0.754556	0.307185
B4	29	1651	1.01085	0.562662
B4	30	1651	1.38903	0.940026
B4	31	1651	1.86985	1.42003
B4	32	1651	2.32827	1.87763
B4	33	1651	2.6835	2.23204
B4	34	1651	2.87301	2.42073
B4	35	1651	2.99944	2.54633
B4	36	1651	3.1092	2.65528
B4	37	1651	3.1843	2.72956
B4	38	1651	3.23345	2.77789
B4	39	1651	3.2763	2.81992
B4	40	1651	3.30428	2.84708
B5	1	1651	0.388827	-0.00557256
B5	2	1651	0.39426	-0.000520534
B5	3	1651	0.396927	0.00176623
B5	4	1651	0.394116	-0.00142575
B5	5	1651	0.397339	0.00141685
B5	6	1651	0.396687	0.000384023
B5	7	1651	0.398684	0.00200068
B5	8	1651	0.399227	0.00216274
B5	9	1651	0.394921	-0.00252397
B5	10	1651	0.396659	-0.00116731
B5	11	1651	0.396454	-0.00175245
B5	12	1651	0.400797	0.00220926
B5	13	1651	0.396326	-0.00264241
B5	14	1651	0.398806	-0.000542241
B5	15	1651	0.397732	-0.00199761
B5	16	1651	0.398508	-0.00160252
B5	17	1651	0.401174	0.000683496
B5	18	1651	0.398707	-0.00216489
B5	19	1651	0.402066	0.000813849
B5	20	1651	0.401816	0.000182873
B5	21	1651	0.401756	-0.000257695
B5	22	1651	0.406851	0.00445685
B5	23	1651	0.412009	0.0092344
B5	24	1651	0.422433	0.0192773
B5	25	1651	0.446156	0.0426194
B5	26	1651	0.48395	0.0800333
B5	27	1651	0.570098	0.1658
B5	28	1651	0.716447	0.311769
B5	29	1651	0.975418	0.570359
B5	30	1651	1.37123	0.965794
B5	31	1651	1.86674	1.46092
B5	32	1651	2.37186	1.96566
B5	33	1651	2.75827	2.35169
B5	34	1651	2.96678	2.55982
B5	35	1651	3.10806	2.70071
B5	36	1651	3.22419	2.81647
B5	37	1651	3.30113	2.89303
B5	38	1651	3.35807	2.94958
B5	39	1651	3.38855	2.97968
B5	40	1651	3.42597	3.01672
B6	1	1651	0.377915	-0.00692555
B6	2	1651	0.385921	0.000594172
B6	3	1651	0.386965	0.00115064
B6	4	1651	0.385976	-0.000324696
B6	5	1651	0.388838	0.00205046
B6	6	1651	0.387468	0.000194218
B6	7	1651	0.387809	4.81553e-05
B6	8	1651	0.38842	0.000172399
B6	9	1651	0.387796	-0.000938424
B6	10	1651	0.390376	0.00115492
B6	11	1651	0.390515	0.000806886
B6	12	1651	0.389628	-0.000566914
B6	13	1651	0.389258	-0.00142334
B6	14	1651	0.390587	-0.000581252
B6	15	1651	0.389019	-0.00263595
B6	16	1651	0.390178	-0.00196429
B6	17	1651	0.390294	-0.00233495
B6	18	1651	0.39311	-5.0015e-06
B6	19	1651	0.392208	-0.00139382
B6	20	1651	0.394075	-1.39457e-05
B6	21	1651	0.396192	0.00161666
B6	22	1651	0.400051	0.00498825
B6	23	1651	0.404005	0.00845551
B6	24	1651	0.416881	0.0208455
B6	25	1651	0.438041	0.0415187
B6	26	1651	0.479446	0.0824364
B6	27	1651	0.564023	0.166527
B6	28	1651	0.713756	0.315773
B6	29	1651	0.974081	0.575611
B6	30	1651	1.36497	0.966013
B6	31	1651	1.85383	1.45439
B6	32	1651	2.34727	1.94734
B6	33	1651	2.72583	2.32542
B6	34	1651	2.94883	2.54792
B6	35	1651	3.09504	2.69365
B6	36	1651	3.19566	2.79378
B6	37	1651	3.26209	2.85973
B6	38	1651	3.31665	2.91379
B6	39	1651	3.36199	2.95866
B6	40	1651	3.38845	2.98463
B7	1	1651	0.419351	-0.00790214
B7	2	1651	0.430884	0.00278786
B7	3	1651	0.427574	-0.00136546
B7	4	1651	0.431344	0.00156228
B7	5	1651	0.430374	-0.000251109
B7	6	1651	0.43051	-0.000957818
B7	7	1651	0.433218	0.00090777
B7	8	1651	0.432095	-0.00105818
B7	9	1651	0.43299	-0.00100642
B7	10	1651	0.437276	0.00243711
B7	11	1651	0.437124	0.00144224
B7	12	1651	0.435974	-0.000550585
B7	13	1651	0.43862	0.00125218
B7	14	1651	0.439556	0.00134602
B7	15	1651	0.438676	-0.00037677
B7	16	1651	0.439064	-0.000831591
B7	17	1651	0.440225	-0.000513816
B7	18	1651	0.439875	-0.00170621
B7	19	1651	0.440873	-0.00155188
B7	20	1651	0.440698	-0.00256907
B7	21	1651	0.444048	-6.20727e-05
B7	22	1651	0.445739	0.000786154
B7	23	1651	0.448863	0.00306722
B7	24	1651	0.454491	0.0078526
B7	25	1651	0.471692	0.0242103
B7	26	1651	0.506256	0.0579317
B7	27	1651	0.558263	0.109096
B7	28	1651	0.670713	0.220703
B7	29	1651	0.860709	0.409856
B7	30	1651	1.17043	0.718733
B7	31	1651	1.60615	1.15361
B7	32	1651	2.06915	1.61576
B7	33	1651	2.41959	1.96536
B7	34	1651	2.63137	2.1763
B7	35	1651	2.79645	2.34054
B7	36	1651	2.92824	2.47149
B7	37	1651	2.99799	2.54039
B7	38	1651	3.06277	2.60434
B7	39	1651	3.09978	2.6405
B7	40	1651	3.13028	2.67016
B8	1	1651	0.400426	-0.0170871
B8	2	1651	0.413234	-0.00490364
B8	3	1651	0.421113	0.00234952
B8	4	1651	0.420235	0.00084666
B8	5	1651	0.420125	0.000111572
B8	6	1651	0.421355	0.000716546
B8	7	1651	0.422381	0.00111672
B8	8	1651	0.419355	-0.00253432
B8	9	1651	0.422184	-0.00033069
B8	10	1651	0.424881	0.00174074
B8	11	1651	0.423074	-0.000690699
B8	12	1651	0.422123	-0.00226723
B8	13	1651	0.423435	-0.00158065
B8	14	1651	0.424464	-0.00117729
B8	15	1651	0.426461	0.000195358
B8	16	1651	0.42851	0.00161858
B8	17	1651	0.425513	-0.00200354
B8	18	1651	0.424534	-0.0036077
B8	19	1651	0.426559	-0.00220787
B8	20	1651	0.43129	0.00189804
B8	21	1651	0.431216	0.0011989
B8	22	1651	0.43306	0.00241735
B8	23	1651	0.433458	0.00219001
B8	24	1651	0.439899	0.00800562
B8	25	1651	0.450674	0.0181559
B8	26	1651	0.469835	0.036691
B8	27	1651	0.511081	0.0773117
B8	28	1651	0.581527	0.147132
B8	29	1651	0.713086	0.278066
B8	30	1651	0.949126	0.513482
B8	31	1651	1.32051	0.88424
B8	32	1651	1.80622	1.36932
B8	33	1651	2.32083	1.88331
B8	34	1651	2.71225	2.2741
B8	35	1651	2.92934	2.49057
B8	36	1651	3.07519	2.63579
B8	37	1651	3.18193	2.74191
B8	38	1651	3.27145	2.8308
B8	39	1651	3.32833	2.88706
B8	40	1651	3.36778	2.92589
B9	1	1651	0.387628	-0.0132654
B9	2	1651	0.400387	-0.00110294
B9	3	1651	0.400401	-0.00168532
B9	4	1651	0.401571	-0.00111188
B9	5	1651	0.40239	-0.000889802
B9	6	1651	0.405109	0.00123286
B9	7	1651	0.405077	0.000604492
B9	8	1651	0.405275	0.000206052
B9	9	1651	0.405803	0.000137853
B9	10	1651	0.408236	0.00197366
B9	11	1651	0.408181	0.00132262
B9	12	1651	0.408472	0.00101746
B9	13	1651	0.408221	0.00017017
B9	14	1651	0.409127	0.000479446
B9	15	1651	0.410246	0.00100127
B9	16	1651	0.40907	-0.000770994
B9	17	1651	0.408714	-0.0017231
B9	18	1651	0.409355	-0.00167826
B9	19	1651	0.410668	-0.000961795
B9	20	1651	0.411627	-0.000599977
B9	21	1651	0.411828	-0.000994899
B9	22	1651	0.413633	0.000213126
B9	23	1651	0.416073	0.00205701
B9	24	1651	0.420577	0.00596415
B9	25	1651	0.432789	0.0175804
B9	26	1651	0.45282	0.0370141
B9	27	1651	0.493058	0.0766562
B9	28	1651	0.564591	0.147593
B9	29	1651	0.699106	0.281511
B9	30	1651	0.940666	0.522474
B9	31	1651	1.31417	0.89538
B9	32	1651	1.79129	1.37191
B9	33	1651	2.28267	1.86269
B9	34	1651	2.65619	2.23561
B9	35	1651	2.87071	2.44953
B9	36	1651	3.0111	2.58933
B9	37	1651	3.11248	2.69011
B9	38	1651	3.19511	2.77214
B9	39	1651	3.2523	2.82874
B9	40	1651	3.27832	2.85416
B10	1	1651	0.365054	-0.00111134
B10	2	1651	0.367682	0.0014774
B10	3	1651	0.366719	0.000475177
B10	4	1651	0.368059	0.00177721
B10	5	1651	0.36865	0.00232956
B10	6	1651	0.36737	0.00101033
B10	7	1651	0.365441	-0.000957105
B10	8	1651	0.366582	0.000144416
B10	9	1651	0.367231	0.000754645
B10	10	1651	0.365149	-0.00136627
B10	11	1651	0.366023	-0.000530974
B10	12	1651	0.365574	-0.00101839
B10	13	1651	0.365133	-0.00149839
B10	14	1651	0.365528	-0.00114145
B10	15	1651	0.363885	-0.00282418
B10	16	1651	0.367011	0.000263511
B10	17	1651	0.367052	0.000266101
B10	18	1651	0.365911	-0.000914133
B10	19	1651	0.36465	-0.00221334
B10	20	1651	0.366247	-0.000655932
B10	21	1651	0.367381	0.000439479
B10	22	1651	0.366266	-0.000713874
B10	23	1651	0.368568	0.00154946
B10	24	1651	0.371882	0.00482417
B10	25	1651	0.376961	0.00986505
B10	26	1651	0.395313	0.028178
B10	27	1651	0.429932	0.0627578
B10	28	1651	0.492335	0.125122
B10	29	1651	0.608129	0.240877
B10	30	1651	0.814596	0.447305
B10	31	1651	1.15269	0.785366
B10	32	1651	1.62191	1.25454
B10	33	1651	2.14371	1.7763
B10	34	1651	2.58621	2.21877
B10	35	1651	2.86937	2.50189
B10	36	1651	3.03385	2.66633
B10	37	1651	3.12723	2.75967
B10	38	1651	3.21289	2.84529
B10	39	1651	3.27889	2.91125
B10	40	1651	3.31671	2.94903
B11	1	1651	0.375841	-0.00404271
B11	2	1651	0.383656	0.00368122
B11	3	1651	0.37914	-0.000925437
B11	4	1651	0.381734	0.00157722
B11	5	1651	0.380383	0.000134877
B11	6	1651	0.379494	-0.000844722
B11	7	1651	0.38097	0.000540404
B11	8	1651	0.378873	-0.00164825
B11	9	1651	0.37886	-0.00175228
B11	10	1651	0.383492	0.00278912
B11	11	1651	0.379773	-0.00102093
B11	12	1651	0.382239	0.00135355
B11	13	1651	0.379968	-0.00100825
B11	14	1651	0.383788	0.00272017
B11	15	1651	0.381042	-0.000116262
B11	16	1651	0.381867	0.000617624
B11	17	1651	0.380502	-0.000839259
B11	18	1651	0.379168	-0.00226428
B11	19	1651	0.378305	-0.00321783
B11	20	1651	0.38578	0.00416605
B11	21	1651	0.382741	0.00103636
B11	22	1651	0.380848	-0.00094808
B11	23	1651	0.381537	-0.000349794
B11	24	1651	0.391434	0.00945565
B11	25	1651	0.406485	0.0244156
B11	26	1651	0.436467	0.0543064
B11	27	1651	0.487862	0.105611
B11	28	1651	0.585418	0.203075
B11	29	1651	0.764882	0.382449
B11	30	1651	1.06157	0.679048
B11	31	1651	1.50055	1.11793
B11	32	1651	2.01855	1.63585
B11	33	1651	2.50568	2.12288
B11	34	1651	2.84503	2.46214
B11	35	1651	3.03835	2.65537
B11	36	1651	3.16652	2.78345
B11	37	1651	3.24774	2.86458
B11	38	1651	3.31185	2.9286
B11	39	1651	3.37936	2.99602
B11	40	1651	3.42066	3.03722
B12	1	1651	0.354205	-0.00199781
B12	2	1651	0.355757	-0.000625687
B12	3	1651	0.35671	0.000146814
B12	4	1651	0.357961	0.00121802
B12	5	1651	0.356541	-0.00038177
B12	6	1651	0.358158	0.0010561
B12	7	1651	0.358536	0.00125437
B12	8	1651	0.358436	0.000973625
B12	9	1651	0.356476	-0.00116547
B12	10	1651	0.355347	-0.00247436
B12	11	1651	0.356193	-0.00180799
B12	12	1651	0.357362	-0.000818706
B12	13	1651	0.359275	0.000914264
B12	14	1651	0.36008	0.0015393
B12	15	1651	0.360511	0.00179029
B12	16	1651	0.356312	-0.00258878
B12	17	1651	0.35708	-0.00200063
B12	18	1651	0.358726	-0.000533706
B12	19	1651	0.360881	0.00144105
B12	20	1651	0.357576	-0.00204356
B12	21	1651	0.35951	-0.000289461
B12	22	1651	0.36375	0.00377059
B12	23	1651	0.364452	0.00429288
B12	24	1651	0.380271	0.0199325
B12	25	1651	0.395745	0.0352265
B12	26	1651	0.425039	0.0643408
B12	27	1651	0.489728	0.12885
B12	28	1651	0.610928	0.24987
B12	29	1651	0.824278	0.46304
B12	30	1651	1.16672	0.805306
B12	31	1651	1.6416	1.28001
B12	32	1651	2.14354	1.78176
B12	33	1651	2.55761	2.19566
B12	34	1651	2.81759	2.45546
B12	35	1651	2.9621	2.59978
B12	36	1651	3.08705	2.72456
B12	37	1651	3.17636	2.81368
B12	38	1651	3.23614	2.87329
B12	39	1651	3.28504	2.922
B12	40	1651	3.32692	2.96371
C1	1	0620	0.204134	0.000204696
C1	2	0620	0.209034	0.00420412
C1	3	0620	0.209022	0.00329198
C1	4	0620	0.210055	0.00342562
C1	5	0620	0.207463	-6.61997e-05
C1	6	0620	0.205297	-0.00313289
C1	7	0620	0.208566	-0.000764122
C1	8	0620	0.209495	-0.000735211
C1	9	0620	0.211807	0.000677272
C1	10	0620	0.211697	-0.000332787
C1	11	0620	0.211219	-0.00171092
C1	12	0620	0.212466	-0.00136451
C1	13	0620	0.211873	-0.00285714
C1	14	0620	0.213318	-0.00231237
C1	15	0620	0.214952	-0.0015786
C1	16	0620	0.216655	-0.000775071
C1	17	0620	0.221756	0.00342579
C1	18	0620	0.22404	0.00480916
C1	19	0620	0.232256	0.012126
C1	20	0620	0.247528	0.0264976
C1	21	0620	0.275349	0.0534181
C1	22	0620	0.329649	0.106818
C1	23	0620	0.429327	0.205596
C1	24	0620	0.61032	0.385689
C1	25	0620	0.898839	0.673308
C1	26	0620	1.28572	1.05928
C1	27	0620	1.68348	1.45615
C1	28	0620	1.9643	1.73607
C1	29	0620	2.14878	1.91965
C1	30	0620	2.29374	2.06371
C1	31	0620	2.40532	2.17439
C1	32	0620	2.49457	2.26274
C1	33	0620	2.57043	2.3377
C1	34	0620	2.62979	2.39616
C1	35	0620	2.67448	2.43995
C1	36	0620	2.70333	2.4679
C1	37	0620	2.72886	2.49253
C1	38	0620	2.75763	2.5204
C1	39	0620	2.77855	2.54042
C1	40	0620	2.79063	2.5516
C2	1	0620	0.352706	-0.00840744
C2	2	0620	0.361341	-0.000606275
C2	3	0620	0.364202	0.00142036
C2	4	0620	0.365429	0.00181339
C2	5	0620	0.362849	-0.00160104
C2	6	0620	0.365741	0.000456738
C2	7	0620	0.364417	-0.00170161
C2	8	0620	0.365963	-0.000989914
C2	9	0620	0.368183	0.00039657
C2	10	0620	0.370031	0.00140948
C2	11	0620	0.366495	-0.0029602
C2	12	0620	0.372275	0.0019856
C2	13	0620	0.368386	-0.00273786
C2	14	0620	0.372891	0.000933356
C2	15	0620	0.373712	0.000920502
C2	16	0620	0.371385	-0.0022407
C2	17	0620	0.377356	0.00289534
C2	18	0620	0.380061	0.00476655
C2	19	0620	0.391029	0.0149004
C2	20	0620	0.407104	0.0301408
C2	21	0620	0.439594	0.0617973
C2	22	0620	0.510464	0.131833
C2	23	0620	0.629923	0.250457
C2	24	0620	0.844536	0.464236
C2	25	0620	1.18741	0.806273
C2	26	0620	1.65045	1.26848
C2	27	0620	2.08418	1.70138
C2	28	0620	2.37643	1.9928
C2	29	0620	2.5757	2.19123
C2	30	0620	2.74113	2.35583
C2	31	0620	2.87153	2.48539
C2	32	0620	2.96237	2.5754
C2	33	0620	3.02816	2.64035
C2	34	0620	3.09305	2.70441
C2	35	0620	3.12724	2.73776
C2	36	0620	3.15992	2.76961
C2	37	0620	3.18422	2.79308
C2	38	0620	3.2111	2.81913
C2	39	0620	3.21905	2.82624
C2	40	0620	3.23969	2.84604
C3	1	0620	0.310582	-0.00370274
C3	2	0620	0.319592	0.00418891
C3	3	0620	0.317351	0.000830365
C3	4	0620	0.317279	-0.000358989
C3	5	0620	0.319811	0.00105581
C3	6	0620	0.319874	4.8223e-07
C3	7	0620	0.322356	0.00136516
C3	8	0620	0.321184	-0.000924348
C3	9	0620	0.323014	-0.000212015
C3	10	0620	0.321653	-0.00268999
C3	11	0620	0.326544	0.00108331
C3	12	0620	0.326936	0.000357679
C3	13	0620	0.326728	-0.000968199
C3	14	0620	0.324844	-0.0039698
C3	15	0620	0.331575	0.00164367
C3	16	0620	0.330816	-0.000233102
C3	17	0620	0.335187	0.00301997
C3	18	0620	0.342396	0.00911177
C3	19	0620	0.354545	0.0201432
C3	20	0620	0.379211	0.0436915
C3	21	0620	0.432384	0.0957474
C3	22	0620	0.522927	0.185173
C3	23	0620	0.694497	0.355625
C3	24	0620	0.975515	0.635525
C3	25	0620	1.39098	1.04987
C3	26	0620	1.81731	1.47508
C3	27	0620	2.12773	1.78439
C3	28	0620	2.36776	2.0233
C3	29	0620	2.56629	2.22072
C3	30	0620	2.71283	2.36614
C3	31	0620	2.81122	2.46341
C3	32	0620	2.88416	2.53523
C3	33	0620	2.94211	2.59206
C3	34	0620	2.98675	2.63558
C3	35	0620	3.02805	2.67577
C3	36	0620	3.05876	2.70536
C3	37	0620	3.06981	2.71529
C3	38	0620	3.09555	2.73992
C3	39	0620	3.11936	2.76261
C3	40	0620	3.12832	2.77045
C4	1	0620	0.353134	-0.00816891
C4	2	0620	0.360942	-0.000608855
C4	3	0620	0.362404	0.000605098
C4	4	0620	0.365993	0.00394634
C4	5	0620	0.363451	0.00115659
C4	6	0620	0.361245	-0.00129646
C4	7	0620	0.362812	2.2341e-05
C4	8	0620	0.36276	-0.000277635
C4	9	0620	0.361197	-0.00208805
C4	10	0620	0.364052	0.00051895
C4	11	0620	0.361799	-0.00198199
C4	12	0620	0.364069	4.09798e-05
C4	13	0620	0.364455	0.000178472
C4	14	0620	0.361214	-0.00330993
C4	15	0620	0.364263	-0.000509039
C4	16	0620	0.364429	-0.000590832
C4	17	0620	0.364708	-0.000559108
C4	18	0620	0.363236	-0.00227916
C4	19	0620	0.365335	-0.000427263
C4	20	0620	0.368747	0.00273618
C4	21	0620	0.370373	0.00411452
C4	22	0620	0.378037	0.011531
C4	23	0620	0.393326	0.0265727
C4	24	0620	0.420543	0.0535414
C4	25	0620	0.476696	0.109446
C4	26	0620	0.579095	0.211598
C4	27	0620	0.763602	0.395857
C4	28	0620	1.07277	0.704779
C4	29	0620	1.50599	1.13775
C4	30	0620	1.92665	1.55816
C4	31	0620	2.22223	1.85349
C4	32	0620	2.44923	2.08025
C4	33	0620	2.64551	2.27628
C4	34	0620	2.79012	2.42064
C4	35	0620	2.8907	2.52097
C4	36	0620	2.96822	2.59824
C4	37	0620	3.01932	2.64909
C4	38	0620	3.07241	2.70194
C4	39	0620	3.101	2.73028
C4	40	0620	3.13134	2.76037
C5	1	0620	0.357505	-0.00211715
C5	2	0620	0.362209	0.00230479
C5	3	0620	0.362167	0.0019799
C5	4	0620	0.36161	0.00114
C5	5	0620	0.36214	0.00138717
C5	6	0620	0.362006	0.000971358
C5	7	0620	0.360333	-0.000984997
C5	8	0620	0.3602	-0.00140004
C5	9	0620	0.36006	-0.00182262
C5	10	0620	0.362141	-2.44746e-05
C5	11	0620	0.360868	-0.00158088
C5	12	0620	0.362876	0.000144898
C5	13	0620	0.364055	0.00104086
C5	14	0620	0.36264	-0.000655974
C5	15	0620	0.36138	-0.00219921
C5	16	0620	0.361338	-0.00252404
C5	17	0620	0.362171	-0.00197378
C5	18	0620	0.364046	-0.000380559
C5	19	0620	0.365797	0.0010871
C5	20	0620	0.370788	0.00579526
C5	21	0620	0.376966	0.0116907
C5	22	0620	0.387936	0.0223788
C5	23	0620	0.411204	0.0453632
C5	24	0620	0.462392	0.0962689
C5	25	0620	0.558076	0.19167
C5	26	0620	0.725091	0.358403
C5	27	0620	1.00841	0.641434
C5	28	0620	1.41378	1.04653
C5	29	0620	1.8051	1.43757
C5	30	0620	2.11943	1.75162
C5	31	0620	2.36614	1.99804
C5	32	0620	2.54185	2.17347
C5	33	0620	2.68424	2.31557
C5	34	0620	2.78232	2.41337
C5	35	0620	2.85494	2.48571
C5	36	0620	2.9116	2.54208
C5	37	0620	2.95406	2.58426
C5	38	0620	2.99046	2.62038
C5	39	0620	3.02357	2.6532
C5	40	0620	3.03977	2.66912
C6	1	0620	0.337348	-0.00780289
C6	2	0620	0.34552	-9.96824e-05
C6	3	0620	0.346657	0.000568177
C6	4	0620	0.34661	5.33316e-05
C6	5	0620	0.347309	0.000283663
C6	6	0620	0.349958	0.00246429
C6	7	0620	0.345262	-0.002701
C6	8	0620	0.348715	0.000283811
C6	9	0620	0.349387	0.000487678
C6	10	0620	0.348907	-0.000460702
C6	11	0620	0.352863	0.00302661
C6	12	0620	0.348363	-0.00194252
C6	13	0620	0.3492	-0.00157388
C6	14	0620	0.349028	-0.00221392
C6	15	0620	0.350027	-0.00168336
C6	16	0620	0.353043	0.000863472
C6	17	0620	0.350243	-0.00240451
C6	18	0620	0.354628	0.00151156
C6	19	0620	0.357022	0.00343732
C6	20	0620	0.360555	0.00650152
C6	21	0620	0.370834	0.0163117
C6	22	0620	0.390164	0.0351731
C6	23	0620	0.427624	0.0721647
C6	24	0620	0.49885	0.142922
C6	25	0620	0.634121	0.277725
C6	26	0620	0.865734	0.508869
C6	27	0620	1.23491	0.877577
C6	28	0620	1.6595	1.3017
C6	29	0620	2.03656	1.67829
C6	30	0620	2.31689	1.95816
C6	31	0620	2.52811	2.1689
C6	32	0620	2.67572	2.31605
C6	33	0620	2.79031	2.43016
C6	34	0620	2.87524	2.51463
C6	35	0620	2.94033	2.57925
C6	36	0620	2.9941	2.63255
C6	37	0620	3.02197	2.65995
C6	38	0620	3.05891	2.69643
C6	39	0620	3.08117	2.71821
C6	40	0620	3.10602	2.7426
C7	1	0620	0.370919	-0.0108171
C7	2	0620	0.381225	-0.00117814
C7	3	0620	0.383889	0.000818369
C7	4	0620	0.384679	0.000940993
C7	5	0620	0.387196	0.00279051
C7	6	0620	0.384696	-0.000377336
C7	7	0620	0.384988	-0.00075253
C7	8	0620	0.386333	-7.53736e-05
C7	9	0620	0.387848	0.000772222
C7	10	0620	0.386806	-0.000937102
C7	11	0620	0.384849	-0.00356163
C7	12	0620	0.387356	-0.00172179
C7	13	0620	0.388506	-0.00123957
C7	14	0620	0.390451	3.80714e-05
C7	15	0620	0.390082	-0.000998406
C7	16	0620	0.388471	-0.0032766
C7	17	0620	0.395652	0.00323642
C7	18	0620	0.397426	0.00434374
C7	19	0620	0.404903	0.011153
C7	20	0620	0.423264	0.0288468
C7	21	0620	0.444744	0.0496588
C7	22	0620	0.493147	0.0973941
C7	23	0620	0.58545	0.18903
C7	24	0620	0.755067	0.35798
C7	25	0620	1.03804	0.640284
C7	26	0620	1.4483	1.04987
C7	27	0620	1.86735	1.46826
C7	28	0620	2.20403	1.80428
C7	29	0620	2.45724	2.05681
C7	30	0620	2.65349	2.25239
C7	31	0620	2.8024	2.40064
C7	32	0620	2.90621	2.50378
C7	33	0620	2.99125	2.58816
C7	34	0620	3.05654	2.65278
C7	35	0620	3.11002	2.70559
C7	36	0620	3.14995	2.74486
C7	37	0620	3.18085	2.77508
C7	38	0620	3.20626	2.79982
C7	39	0620	3.23671	2.82961
C7	40	0620	3.25127	2.8435
C8	1	0620	0.36902	-0.0094642
C8	2	0620	0.37748	-0.0014135
C8	3	0620	0.379604	0.000300695
C8	4	0620	0.378738	-0.000974942
C8	5	0620	0.382551	0.00242883
C8	6	0620	0.381088	0.000556496
C8	7	0620	0.381401	0.000459333
C8	8	0620	0.378375	-0.00297581
C8	9	0620	0.381137	-0.000623936
C8	10	0620	0.381815	-0.000354828
C8	11	0620	0.383999	0.00141927
C8	12	0620	0.382571	-0.000418679
C8	13	0620	0.384464	0.00106499
C8	14	0620	0.382809	-0.000999988
C8	15	0620	0.381501	-0.00271724
C8	16	0620	0.385241	0.000613555
C8	17	0620	0.38726	0.00222225
C8	18	0620	0.392724	0.00727731
C8	19	0620	0.406317	0.0204601
C8	20	0620	0.429959	0.0436929
C8	21	0620	0.473649	0.0869733
C8	22	0620	0.55833	0.171245
C8	23	0620	0.711667	0.324172
C8	24	0620	0.97103	0.583126
C8	25	0620	1.34247	0.954157
C8	26	0620	1.75129	1.36256
C8	27	0620	2.08589	1.69676
C8	28	0620	2.32949	1.93995
C8	29	0620	2.52574	2.13579
C8	30	0620	2.65462	2.26426
C8	31	0620	2.75769	2.36692
C8	32	0620	2.83821	2.44703
C8	33	0620	2.89963	2.50804
C8	34	0620	2.94826	2.55626
C8	35	0620	2.98698	2.59457
C8	36	0620	3.03326	2.64044
C8	37	0620	3.05148	2.65825
C8	38	0620	3.07374	2.6801
C8	39	0620	3.09463	2.70058
C8	40	0620	3.11594	2.72148
C9	1	0620	0.338433	-0.017974
C9	2	0620	0.355901	-0.00111929
C9	3	0620	0.360319	0.00268463
C9	4	0620	0.360882	0.00263418
C9	5	0620	0.355905	-0.00295637
C9	6	0620	0.358908	-0.000566754
C9	7	0620	0.359893	-0.000195201
C9	8	0620	0.359647	-0.00105502
C9	9	0620	0.362408	0.00109281
C9	10	0620	0.362897	0.0009689
C9	11	0620	0.362656	0.000114236
C9	12	0620	0.362706	-0.000449378
C9	13	0620	0.360414	-0.00335549
C9	14	0620	0.364031	-0.000351732
C9	15	0620	0.363564	-0.00143254
C9	16	0620	0.362951	-0.00265845
C9	17	0620	0.364366	-0.00185682
C9	18	0620	0.368969	0.00213211
C9	19	0620	0.372701	0.00525087
C9	20	0620	0.379268	0.0112041
C9	21	0620	0.396656	0.0279793
C9	22	0620	0.425813	0.0565219
C9	23	0620	0.489994	0.12009
C9	24	0620	0.602894	0.232377
C9	25	0620	0.811371	0.44024
C9	26	0620	1.14289	0.771148
C9	27	0620	1.56038	1.18802
C9	28	0620	1.93799	1.56502
C9	29	0620	2.25391	1.88032
C9	30	0620	2.49444	2.12024
C9	31	0620	2.6629	2.28809
C9	32	0620	2.80058	2.42515
C9	33	0620	2.88554	2.5095
C9	34	0620	2.95511	2.57846
C9	35	0620	3.02176	2.64449
C9	36	0620	3.06643	2.68855
C9	37	0620	3.09275	2.71426
C9	38	0620	3.12794	2.74883
C9	39	0620	3.1535	2.77378
C9	40	0620	3.18315	2.80282
C10	1	0620	0.337048	-0.0092716
C10	2	0620	0.348907	0.00182523
C10	3	0620	0.349857	0.00201179
C10	4	0620	0.349828	0.00121979
C10	5	0620	0.352417	0.00304622
C10	6	0620	0.347248	-0.00288541
C10	7	0620	0.352181	0.00128483
C10	8	0620	0.350963	-0.000696527
C10	9	0620	0.351033	-0.00138929
C10	10	0620	0.355121	0.00193581
C10	11	0620	0.35154	-0.00240755
C10	12	0620	0.351444	-0.0032667
C10	13	0620	0.355014	-0.00045912
C10	14	0620	0.354337	-0.00189879
C10	15	0620	0.356943	-5.6174e-05
C10	16	0620	0.357211	-0.000550302
C10	17	0620	0.357099	-0.00142539
C10	18	0620	0.357019	-0.00226824
C10	19	0620	0.362318	0.00226803
C10	20	0620	0.36635	0.00553704
C10	21	0620	0.373801	0.0122253
C10	22	0620	0.395033	0.0326947
C10	23	0620	0.429709	0.0666073
C10	24	0620	0.497106	0.133242
C10	25	0620	0.625021	0.260394
C10	26	0620	0.850218	0.484828
C10	27	0620	1.20517	0.839015
C10	28	0620	1.6835	1.31658
C10	29	0620	2.12663	1.75895
C10	30	0620	2.437	2.06856
C10	31	0620	2.66626	2.29706
C10	32	0620	2.8616	2.49164
C10	33	0620	3.0001	2.62937
C10	34	0620	3.10063	2.72914
C10	35	0620	3.17827	2.80601
C10	36	0620	3.23612	2.8631
C10	37	0620	3.26022	2.88644
C10	38	0620	3.30086	2.92632
C10	39	0620	3.3305	2.9552
C10	40	0620	3.35219	2.97612
C11	1	0620	0.331101	-0.00450853
C11	2	0620	0.338622	0.00227272
C11	3	0620	0.339605	0.00251756
C11	4	0620	0.337966	0.000138892
C11	5	0620	0.338451	-0.000114242
C11	6	0620	0.34019	0.000885752
C11	7	0620	0.338796	-0.00124743
C11	8	0620	0.341568	0.00078575
C11	9	0620	0.343366	0.00184466
C11	10	0620	0.3411	-0.00116051
C11	11	0620	0.342728	-0.0002709
C11	12	0620	0.341972	-0.00176658
C11	13	0620	0.342957	-0.00152017
C11	14	0620	0.342842	-0.00237409
C11	15	0620	0.343587	-0.0023683
C11	16	0620	0.345808	-0.000886253
C11	17	0620	0.34558	-0.00185262
C11	18	0620	0.350365	0.00219282
C11	19	0620	0.34932	0.000408948
C11	20	0620	0.354436	0.00478671
C11	21	0620	0.364329	0.0139404
C11	22	0620	0.376522	0.0253947
C11	23	0620	0.409251	0.0573845
C11	24	0620	0.464443	0.111838
C11	25	0620	0.572435	0.21909
C11	26	0620	0.765767	0.411683
C11	27	0620	1.0757	0.720878
C11	28	0620	1.51566	1.1601
C11	29	0620	1.95449	1.59819
C11	30	0620	2.26652	1.90948
C11	31	0620	2.48294	2.12516
C11	32	0620	2.66594	2.30742
C11	33	0620	2.81396	2.45471
C11	34	0620	2.91772	2.55773
C11	35	0620	3.00048	2.63974
C11	36	0620	3.04705	2.68557
C11	37	0620	3.09044	2.72823
C11	38	0620	3.12879	2.76584
C11	39	0620	3.15839	2.7947
C11	40	0620	3.17879	2.81436
C12	1	0620	0.349027	-0.00448721
C12	2	0620	0.351722	-0.0024345
C12	3	0620	0.355516	0.00071616
C12	4	0620	0.356242	0.000800666
C12	5	0620	0.353335	-0.00274949
C12	6	0620	0.357971	0.00124496
C12	7	0620	0.35997	0.00260078
C12	8	0620	0.358468	0.000456576
C12	9	0620	0.361058	0.00240403
C12	10	0620	0.357372	-0.00192355
C12	11	0620	0.358984	-0.000954127
C12	12	0620	0.358236	-0.00234469
C12	13	0620	0.359297	-0.00192589
C12	14	0620	0.359702	-0.00216354
C12	15	0620	0.362697	0.000189336
C12	16	0620	0.362008	-0.00114239
C12	17	0620	0.365136	0.00134343
C12	18	0620	0.366717	0.00228169
C12	19	0620	0.366243	0.00116605
C12	20	0620	0.371161	0.00544163
C12	21	0620	0.381618	0.0152562
C12	22	0620	0.393334	0.0263299
C12	23	0620	0.423421	0.0557747
C12	24	0620	0.474226	0.105937
C12	25	0620	0.579514	0.210582
C12	26	0620	0.761009	0.391435
C12	27	0620	1.05959	0.689374
C12	28	0620	1.47536	1.1045
C12	29	0620	1.89691	1.5254
C12	30	0620	2.20592	1.83378
C12	31	0620	2.4104	2.03761
C12	32	0620	2.5906	2.21717
C12	33	0620	2.74002	2.36595
C12	34	0620	2.83509	2.46038
C12	35	0620	2.91883	2.54348
C12	36	0620	2.96942	2.59342
C12	37	0620	3.00154	2.6249
C12	38	0620	3.04391	2.66662
C12	39	0620	3.06835	2.69043
C12	40	0620	3.09171	2.71314
D1	1	0620	0.319516	-0.00140055
D1	2	0620	0.321986	0.000633093
D1	3	0620	0.324124	0.00233426
D1	4	0620	0.321848	-0.000378172
D1	5	0620	0.323783	0.00112016
D1	6	0620	0.324795	0.00169534
D1	7	0620	0.323737	0.00020057
D1	8	0620	0.324665	0.000691944
D1	9	0620	0.322774	-0.00163547
D1	10	0620	0.323622	-0.00122445
D1	11	0620	0.324686	-0.000596757
D1	12	0620	0.326747	0.00102788
D1	13	0620	0.324931	-0.00122539
D1	14	0620	0.325363	-0.00122987
D1	15	0620	0.325254	-0.00177523
D1	16	0620	0.324111	-0.00335505
D1	17	0620	0.324328	-0.0035747
D1	18	0620	0.327574	-0.000765393
D1	19	0620	0.32853	-0.00024514
D1	20	0620	0.331204	0.00199155
D1	21	0620	0.336593	0.00694391
D1	22	0620	0.344038	0.0139529
D1	23	0620	0.363265	0.0327426
D1	24	0620	0.396037	0.0650787
D1	25	0620	0.466157	0.134762
D1	26	0620	0.590471	0.258639
D1	27	0620	0.808431	0.476162
D1	28	0620	1.13672	0.804018
D1	29	0620	1.55435	1.2212
D1	30	0620	1.93132	1.59774
D1	31	0620	2.17381	1.83979
D1	32	0620	2.34011	2.00566
D1	33	0620	2.50115	2.16627
D1	34	0620	2.62665	2.29133
D1	35	0620	2.70354	2.36778
D1	36	0620	2.76767	2.43147
D1	37	0620	2.82186	2.48522
D1	38	0620	2.86274	2.52567
D1	39	0620	2.88257	2.54506
D1	40	0620	2.91304	2.5751
D2	1	0620	0.307297	-0.00387045
D2	2	0620	0.310786	-0.000974191
D2	3	0620	0.312553	0.000200065
D2	4	0620	0.313548	0.000602768
D2	5	0620	0.316303	0.00276443
D2	6	0620	0.313039	-0.00109236
D2	7	0620	0.315634	0.000909805
D2	8	0620	0.31357	-0.00174646
D2	9	0620	0.316279	0.000369429
D2	10	0620	0.314243	-0.00225966
D2	11	0620	0.316944	-0.000151725
D2	12	0620	0.320285	0.00259723
D2	13	0620	0.31564	-0.00264085
D2	14	0620	0.316821	-0.00205271
D2	15	0620	0.319253	-0.000213269
D2	16	0620	0.31892	-0.00113978
D2	17	0620	0.321016	0.000363465
D2	18	0620	0.322125	0.000879417
D2	19	0620	0.324448	0.0026102
D2	20	0620	0.330081	0.00765062
D2	21	0620	0.340328	0.0173045
D2	22	0620	0.356426	0.0328097
D2	23	0620	0.393407	0.0691983
D2	24	0620	0.462428	0.137626
D2	25	0620	0.584412	0.259017
D2	26	0620	0.803965	0.477978
D2	27	0620	1.13798	0.811395
D2	28	0620	1.53874	1.21156
D2	29	0620	1.88084	1.55308
D2	30	0620	2.1455	1.81714
D2	31	0620	2.34498	2.01602
D2	32	0620	2.49093	2.16139
D2	33	0620	2.59306	2.26292
D2	34	0620	2.67939	2.34866
D2	35	0620	2.7437	2.41237
D2	36	0620	2.78944	2.45752
D2	37	0620	2.82748	2.49498
D2	38	0620	2.84744	2.51434
D2	39	0620	2.87965	2.54595
D2	40	0620	2.89008	2.55579
D3	1	0620	0.366998	-0.00474728
D3	2	0620	0.37282	0.000302638
D3	3	0620	0.373395	0.000105437
D3	4	0620	0.377535	0.00347236
D3	5	0620	0.372646	-0.00218818
D3	6	0620	0.37623	0.000622958
D3	7	0620	0.377599	0.00121996
D3	8	0620	0.377009	-0.000142423
D3	9	0620	0.378033	0.000109318
D3	10	0620	0.379661	0.000964825
D3	11	0620	0.376657	-0.00281149
D3	12	0620	0.380038	-0.000202858
D3	13	0620	0.380588	-0.000424765
D3	14	0620	0.380826	-0.000959507
D3	15	0620	0.381001	-0.00155645
D3	16	0620	0.38179	-0.00153994
D3	17	0620	0.383739	-0.000363338
D3	18	0620	0.383142	-0.00173269
D3	19	0620	0.385228	-0.00041859
D3	20	0620	0.388587	0.00216795
D3	21	0620	0.390869	0.00367741
D3	22	0620	0.40058	0.0126169
D3	23	0620	0.420922	0.032186
D3	24	0620	0.454538	0.0650299
D3	25	0620	0.522128	0.131848
D3	26	0620	0.646139	0.255087
D3	27	0620	0.868819	0.476994
D3	28	0620	1.21611	0.823517
D3	29	0620	1.67345	1.28008
D3	30	0620	2.08214	1.688
D3	31	0620	2.3471	1.95219
D3	32	0620	2.55524	2.15956
D3	33	0620	2.73331	2.33685
D3	34	0620	2.86587	2.46864
D3	35	0620	2.95461	2.55661
D3	36	0620	3.02306	2.62429
D3	37	0620	3.06745	2.6679
D3	38	0620	3.09938	2.69906
D3	39	0620	3.13374	2.73264
D3	40	0620	3.15512	2.75326
D4	1	0620	0.35308	0.00281272
D4	2	0620	0.352282	0.00127229
D4	3	0620	0.353512	0.0017598
D4	4	0620	0.354872	0.00237759
D4	5	0620	0.353855	0.000617878
D4	6	0620	0.353623	-0.000356395
D4	7	0620	0.355071	0.000349288
D4	8	0620	0.354963	-0.000501603
D4	9	0620	0.354289	-0.00191761
D4	10	0620	0.359937	0.00298782
D4	11	0620	0.355013	-0.00267877
D4	12	0620	0.355333	-0.00310101
D4	13	0620	0.35656	-0.00261617
D4	14	0620	0.358688	-0.00123087
D4	15	0620	0.360658	-2.90134e-06
D4	16	0620	0.358189	-0.00321432
D4	17	0620	0.362635	0.000488438
D4	18	0620	0.362329	-0.000559626
D4	19	0620	0.37123	0.00759846
D4	20	0620	0.380699	0.0163253
D4	21	0620	0.400105	0.0349893
D4	22	0620	0.430221	0.0643626
D4	23	0620	0.501156	0.134555
D4	24	0620	0.625276	0.257932
D4	25	0620	0.846281	0.478196
D4	26	0620	1.20331	0.834483
D4	27	0620	1.64249	1.27292
D4	28	0620	2.0116	1.64129
D4	29	0620	2.31431	1.94326
D4	30	0620	2.56415	2.19235
D4	31	0620	2.73958	2.36704
D4	32	0620	2.86856	2.49527
D4	33	0620	2.95999	2.58597
D4	34	0620	3.02908	2.65431
D4	35	0620	3.09543	2.71992
D4	36	0620	3.13427	2.75802
D4	37	0620	3.16388	2.78688
D4	38	0620	3.19617	2.81843
D4	39	0620	3.22608	2.8476
D4	40	0620	3.24552	2.8663
D5	1	0620	0.343529	-0.00333781
D5	2	0620	0.349114	0.00160957
D5	3	0620	0.350506	0.00236406
D5	4	0620	0.351807	0.00302751
D5	5	0620	0.35001	0.000592792
D5	6	0620	0.351128	0.00107274
D5	7	0620	0.350799	0.000106629
D5	8	0620	0.349497	-0.00183295
D5	9	0620	0.348227	-0.00374121
D5	10	0620	0.349626	-0.00297941
D5	11	0620	0.352705	-0.00053796
D5	12	0620	0.353758	-0.000122738
D5	13	0620	0.353894	-0.000623967
D5	14	0620	0.354633	-0.000522414
D5	15	0620	0.355068	-0.000725173
D5	16	0620	0.353805	-0.0026255
D5	17	0620	0.356336	-0.000732829
D5	18	0620	0.359095	0.0013889
D5	19	0620	0.364235	0.00589151
D5	20	0620	0.37404	0.0150591
D5	21	0620	0.394473	0.0348547
D5	22	0620	0.423643	0.0633865
D5	23	0620	0.489151	0.128257
D5	24	0620	0.608453	0.246921
D5	25	0620	0.823873	0.461704
D5	26	0620	1.17117	0.808359
D5	27	0620	1.63057	1.26713
D5	28	0620	2.0333	1.66922
D5	29	0620	2.35268	1.98796
D5	30	0620	2.61297	2.24761
D5	31	0620	2.80897	2.44297
D5	32	0620	2.92896	2.56233
D5	33	0620	3.02674	2.65947
D5	34	0620	3.10761	2.7397
D5	35	0620	3.16392	2.79537
D5	36	0620	3.20729	2.83811
D5	37	0620	3.23794	2.86812
D5	38	0620	3.27989	2.90943
D5	39	0620	3.29828	2.92719
D5	40	0620	3.31784	2.9461
D6	1	0620	0.357974	0.00166299
D6	2	0620	0.359907	0.00316675
D6	3	0620	0.357009	-0.000160424
D6	4	0620	0.361466	0.00386699
D6	5	0620	0.358969	0.000940426
D6	6	0620	0.35704	-0.00141867
D6	7	0620	0.359434	0.000545855
D6	8	0620	0.357479	-0.00183831
D6	9	0620	0.35856	-0.00118699
D6	10	0620	0.359408	-0.000767918
D6	11	0620	0.360743	0.000137587
D6	12	0620	0.361789	0.00075389
D6	13	0620	0.358572	-0.00289246
D6	14	0620	0.360324	-0.00157032
D6	15	0620	0.363369	0.00104557
D6	16	0620	0.361744	-0.00100916
D6	17	0620	0.363477	0.000294173
D6	18	0620	0.362989	-0.000623688
D6	19	0620	0.367925	0.00388346
D6	20	0620	0.371572	0.00710118
D6	21	0620	0.382345	0.0174445
D6	22	0620	0.400835	0.0355043
D6	23	0620	0.438777	0.0730173
D6	24	0620	0.509515	0.143326
D6	25	0620	0.639659	0.27304
D6	26	0620	0.867639	0.500591
D6	27	0620	1.23564	0.868159
D6	28	0620	1.70791	1.34001
D6	29	0620	2.15763	1.78929
D6	30	0620	2.47594	2.10718
D6	31	0620	2.70014	2.33094
D6	32	0620	2.88124	2.51161
D6	33	0620	3.03557	2.66551
D6	34	0620	3.12879	2.75831
D6	35	0620	3.19872	2.8278
D6	36	0620	3.24175	2.87041
D6	37	0620	3.29468	2.92291
D6	38	0620	3.31702	2.94481
D6	39	0620	3.34454	2.9719
D6	40	0620	3.36571	2.99265
D7	1	0620	0.346639	-0.00344096
D7	2	0620	0.354106	0.00310655
D7	3	0620	0.353959	0.00203879
D7	4	0620	0.354022	0.00118099
D7	5	0620	0.353989	0.00022839
D7	6	0620	0.355588	0.000906302
D7	7	0620	0.353561	-0.0020402
D7	8	0620	0.355675	-0.00084718
D7	9	0620	0.357681	0.000238816
D7	10	0620	0.357919	-0.000443987
D7	11	0620	0.358511	-0.000771635
D7	12	0620	0.359396	-0.000807458
D7	13	0620	0.359575	-0.00154867
D7	14	0620	0.362709	0.000665102
D7	15	0620	0.362721	-0.000243632
D7	16	0620	0.361015	-0.0028702
D7	17	0620	0.362419	-0.00238609
D7	18	0620	0.367969	0.00224322
D7	19	0620	0.371103	0.00445744
D7	20	0620	0.378851	0.0112852
D7	21	0620	0.397182	0.0286955
D7	22	0620	0.427992	0.0585848
D7	23	0620	0.488183	0.117855
D7	24	0620	0.601803	0.230555
D7	25	0620	0.799713	0.427545
D7	26	0620	1.12994	0.75685
D7	27	0620	1.59011	1.2161
D7	28	0620	2.0268	1.65187
D7	29	0620	2.33097	1.95512
D7	30	0620	2.56752	2.19075
D7	31	0620	2.76373	2.38604
D7	32	0620	2.8918	2.51319
D7	33	0620	2.99821	2.61868
D7	34	0620	3.07245	2.692
D7	35	0620	3.11552	2.73415
D7	36	0620	3.16456	2.78227
D7	37	0620	3.2024	2.81918
D7	38	0620	3.22884	2.84471
D7	39	0620	3.25396	2.86891
D7	40	0620	3.27666	2.89069
D8	1	0620	0.350407	-0.0132901
D8	2	0620	0.362476	-0.00201283
D8	3	0620	0.367038	0.0017578
D8	4	0620	0.369068	0.00299524
D8	5	0620	0.364308	-0.00255665
D8	6	0620	0.370402	0.00274594
D8	7	0620	0.367457	-0.000991791
D8	8	0620	0.368947	-0.000293806
D8	9	0620	0.368993	-0.00103924
D8	10	0620	0.369352	-0.00147213
D8	11	0620	0.371109	-0.000507712
D8	12	0620	0.371535	-0.000872955
D8	13	0620	0.370311	-0.00288975
D8	14	0620	0.372464	-0.00152849
D8	15	0620	0.376318	0.00153401
D8	16	0620	0.374371	-0.00120585
D8	17	0620	0.373707	-0.00266123
D8	18	0620	0.380935	0.00377463
D8	19	0620	0.381164	0.00321197
D8	20	0620	0.389003	0.0102588
D8	21	0620	0.404323	0.0247863
D8	22	0620	0.425958	0.0456296
D8	23	0620	0.477896	0.096776
D8	24	0620	0.570257	0.188345
D8	25	0620	0.742037	0.359333
D8	26	0620	1.03336	0.649865
D8	27	0620	1.45737	1.07308
D8	28	0620	1.93704	1.55196
D8	29	0620	2.32479	1.93892
D8	30	0620	2.57046	2.1838
D8	31	0620	2.7548	2.36735
D8	32	0620	2.90406	2.51582
D8	33	0620	3.0175	2.62846
D8	34	0620	3.09428	2.70445
D8	35	0620	3.15034	2.75972
D8	36	0620	3.20074	2.80932
D8	37	0620	3.23468	2.84247
D8	38	0620	3.25841	2.86541
D8	39	0620	3.28805	2.89426
D8	40	0620	3.30529	2.91071
D9	1	0620	0.338714	-0.00396985
D9	2	0620	0.344806	0.00121569
D9	3	0620	0.34599	0.00149365
D9	4	0620	0.346141	0.000738281
D9	5	0620	0.344739	-0.00156991
D9	6	0620	0.349354	0.00213919
D9	7	0620	0.349567	0.00144554
D9	8	0620	0.346099	-0.00292888
D9	9	0620	0.350529	0.000594919
D9	10	0620	0.35214	0.00129923
D9	11	0620	0.351056	-0.00069043
D9	12	0620	0.351695	-0.000957909
D9	13	0620	0.353646	8.71668e-05
D9	14	0620	0.351831	-0.00263441
D9	15	0620	0.353275	-0.00209705
D9	16	0620	0.35319	-0.0030881
D9	17	0620	0.356427	-0.000756934
D9	18	0620	0.35856	0.000469667
D9	19	0620	0.365453	0.00645597
D9	20	0620	0.370525	0.0106214
D9	21	0620	0.384949	0.0241396
D9	22	0620	0.414013	0.0522975
D9	23	0620	0.466226	0.103603
D9	24	0620	0.569667	0.206139
D9	25	0620	0.757585	0.39315
D9	26	0620	1.06512	0.699775
D9	27	0620	1.51992	1.15368
D9	28	0620	2.00099	1.63383
D9	29	0620	2.35685	1.98879
D9	30	0620	2.60637	2.23741
D9	31	0620	2.80388	2.43401
D9	32	0620	2.9527	2.58192
D9	33	0620	3.06835	2.69666
D9	34	0620	3.14799	2.77539
D9	35	0620	3.20024	2.82674
D9	36	0620	3.24275	2.86835
D9	37	0620	3.2753	2.89999
D9	38	0620	3.2995	2.92329
D9	39	0620	3.32883	2.9517
D9	40	0620	3.33891	2.96089
D10	1	0620	0.323307	0.00102629
D10	2	0620	0.326458	0.0041128
D10	3	0620	0.32333	0.000920947
D10	4	0620	0.32588	0.00340736
D10	5	0620	0.322897	0.000360996
D10	6	0620	0.323982	0.00138244
D10	7	0620	0.323118	0.000454609
D10	8	0620	0.323539	0.000811643
D10	9	0620	0.320979	-0.00181168
D10	10	0620	0.321718	-0.00113692
D10	11	0620	0.32101	-0.00190871
D10	12	0620	0.321121	-0.00186129
D10	13	0620	0.320463	-0.00258325
D10	14	0620	0.319586	-0.00352354
D10	15	0620	0.323427	0.000253251
D10	16	0620	0.321742	-0.00149516
D10	17	0620	0.321422	-0.00187895
D10	18	0620	0.323101	-0.000263575
D10	19	0620	0.326305	0.0028761
D10	20	0620	0.329488	0.00599572
D10	21	0620	0.334165	0.0106085
D10	22	0620	0.34511	0.0214899
D10	23	0620	0.360022	0.0363386
D10	24	0620	0.386765	0.0630173
D10	25	0620	0.434251	0.11044
D10	26	0620	0.505394	0.181519
D10	27	0620	0.619741	0.295803
D10	28	0620	0.807952	0.483949
D10	29	0620	1.09373	0.769663
D10	30	0620	1.44694	1.12281
D10	31	0620	1.79835	1.47415
D10	32	0620	2.09076	1.7665
D10	33	0620	2.31613	1.99181
D10	34	0620	2.48748	2.1631
D10	35	0620	2.6096	2.28515
D10	36	0620	2.71164	2.38713
D10	37	0620	2.77953	2.45495
D10	38	0620	2.83998	2.51534
D10	39	0620	2.88708	2.56238
D10	40	0620	2.92612	2.60136
D11	1	0620	0.288433	0.00113823
D11	2	0620	0.288877	0.00168506
D11	3	0620	0.288871	0.00178229
D11	4	0620	0.289171	0.00218466
D11	5	0620	0.286734	-0.00014926
D11	6	0620	0.28812	0.00133896
D11	7	0620	0.287559	0.000881006
D11	8	0620	0.284545	-0.00203007
D11	9	0620	0.284914	-0.00155879
D11	10	0620	0.286759	0.000389044
D11	11	0620	0.285806	-0.000460456
D11	12	0620	0.283257	-0.00290763
D11	13	0620	0.285529	-0.000532608
D11	14	0620	0.283186	-0.00277257
D11	15	0620	0.284313	-0.00154291
D11	16	0620	0.283462	-0.00229165
D11	17	0620	0.285843	0.00019275
D11	18	0620	0.286546	0.000998352
D11	19	0620	0.291924	0.00647886
D11	20	0620	0.294479	0.00913719
D11	21	0620	0.304722	0.0194825
D11	22	0620	0.315538	0.0304017
D11	23	0620	0.335283	0.0502485
D11	24	0620	0.362932	0.0780009
D11	25	0620	0.413317	0.128488
D11	26	0620	0.48859	0.203864
D11	27	0620	0.608453	0.32383
D11	28	0620	0.794457	0.509936
D11	29	0620	1.06046	0.776042
D11	30	0620	1.38337	1.09906
D11	31	0620	1.699	1.41479
D11	32	0620	1.95715	1.67304
D11	33	0620	2.15856	1.87456
D11	34	0620	2.31094	2.02704
D11	35	0620	2.42639	2.14259
D11	36	0620	2.50735	2.22365
D11	37	0620	2.57952	2.29593
D11	38	0620	2.62654	2.34305
D11	39	0620	2.67369	2.3903
D11	40	0620	2.70728	2.42399
D12	1	0620	0.345423	0.00543896
D12	2	0620	0.343599	0.00353297
D12	3	0620	0.343579	0.00343134
D12	4	0620	0.342471	0.00224144
D12	5	0620	0.339354	-0.00095794
D12	6	0620	0.339756	-0.000637426
D12	7	0620	0.341783	0.00130755
D12	8	0620	0.342039	0.00148168
D12	9	0620	0.341901	0.00126107
D12	10	0620	0.338851	-0.00187003
D12	11	0620	0.340989	0.000185039
D12	12	0620	0.339386	-0.00149925
D12	13	0620	0.34031	-0.000657136
D12	14	0620	0.339141	-0.00190857
D12	15	0620	0.338639	-0.00249185
D12	16	0620	0.33705	-0.00416284
D12	17	0620	0.339657	-0.00163785
D12	18	0620	0.34014	-0.00123693
D12	19	0620	0.338143	-0.00331583
D12	20	0620	0.339646	-0.00189502
D12	21	0620	0.341296	-0.000326976
D12	22	0620	0.344788	0.003083
D12	23	0620	0.351394	0.00960653
D12	24	0620	0.361011	0.0191418
D12	25	0620	0.374022	0.0320706
D12	26	0620	0.402358	0.0603251
D12	27	0620	0.448013	0.105898
D12	28	0620	0.525406	0.183209
D12	29	0620	0.653141	0.310862
D12	30	0620	0.865738	0.523377
D12	31	0620	1.18174	0.839294
D12	32	0620	1.55348	1.21095
D12	33	0620	1.86457	1.52196
D12	34	0620	2.09317	1.75048
D12	35	0620	2.30111	1.95834
D12	36	0620	2.45652	2.11367
D12	37	0620	2.55819	2.21525
D12	38	0620	2.64655	2.30353
D12	39	0620	2.70293	2.35983
D12	40	0620	2.74783	2.40465
E1	1	2949	0.46418	-0.00367667
E1	2	2949	0.469848	0.00157598
E1	3	2949	0.470598	0.00190973
E1	4	2949	0.466283	-0.0028202
E1	5	2949	0.474017	0.00449716
E1	6	2949	0.470187	0.000252165
E1	7	2949	0.471883	0.00153205
E1	8	2949	0.471382	0.000615441
E1	9	2949	0.469627	-0.00155507
E1	10	2949	0.470984	-0.000614038
E1	11	2949	0.469036	-0.00297838
E1	12	2949	0.473357	0.000926847
E1	13	2949	0.472225	-0.000620854
E1	14	2949	0.473279	1.71167e-05
E1	15	2949	0.472301	-0.00137639
E1	16	2949	0.472869	-0.00122384
E1	17	2949	0.470907	-0.00360138
E1	18	2949	0.473448	-0.00147693
E1	19	2949	0.473671	-0.00166904
E1	20	2949	0.477511	0.00175529
E1	21	2949	0.477485	0.00131332
E1	22	2949	0.481705	0.00511701
E1	23	2949	0.489374	0.0123702
E1	24	2949	0.502045	0.0246255
E1	25	2949	0.526581	0.0487464
E1	26	2949	0.573238	0.0949869
E1	27	2949	0.661514	0.182847
E1	28	2949	0.818988	0.339906
E1	29	2949	1.07611	0.596616
E1	30	2949	1.43	0.950086
E1	31	2949	1.74351	1.26318
E1	32	2949	1.92955	1.44881
E1	33	2949	2.089	1.60784
E1	34	2949	2.23494	1.75336
E1	35	2949	2.36231	1.88032
E1	36	2949	2.46501	1.9826
E1	37	2949	2.55123	2.0684
E1	38	2949	2.62778	2.14454
E1	39	2949	2.6734	2.18974
E1	40	2949	2.72388	2.23981
E2	1	2949	0.540765	-0.013637
E2	2	2949	0.561112	0.00607397
E2	3	2949	0.556058	0.000384451
E2	4	2949	0.558917	0.00260829
E2	5	2949	0.559869	0.00292513
E2	6	2949	0.560072	0.00249262
E2	7	2949	0.557371	-0.000843762
E2	8	2949	0.560101	0.00125061
E2	9	2949	0.556386	-0.0031003
E2	10	2949	0.556836	-0.00328509
E2	11	2949	0.562444	0.00168717
E2	12	2949	0.560301	-0.00109102
E2	13	2949	0.557296	-0.00473186
E2	14	2949	0.560934	-0.00172923
E2	15	2949	0.564829	0.00152999
E2	16	2949	0.558838	-0.00509627
E2	17	2949	0.561813	-0.00275674
E2	18	2949	0.566684	0.00147893
E2	19	2949	0.56536	-0.000480233
E2	20	2949	0.569144	0.00266765
E2	21	2949	0.570735	0.0036231
E2	22	2949	0.570214	0.00246658
E2	23	2949	0.578967	0.010585
E2	24	2949	0.594527	0.025509
E2	25	2949	0.618322	0.0486686
E2	26	2949	0.664643	0.0943539
E2	27	2949	0.761692	0.190767
E2	28	2949	0.924541	0.352981
E2	29	2949	1.19972	0.627526
E2	30	2949	1.60325	1.03042
E2	31	2949	2.00992	1.43646
E2	32	2949	2.26576	1.69166
E2	33	2949	2.43607	1.86133
[truncated: 1,847 more rows]
