# Supplementary material for: Exploring the plasmodesmata callose-binding protein gene family in upland cotton: unraveling insights for enhancing fiber length
Source: PeerJ. 2024 Jun 26;12:e17625. doi: 10.7717/peerj.17625 (PMC11214431; doi:10.7717/peerj.17625)
Supplement: Supplemental Information 3 [file peerj-12-17625-s003.xls]

## Sheet: Sample Setup
Block Type	96fast
Chemistry	SYBR_GREEN
Experiment File Name	S:\LQW\ZHB\2014-2.eds
Experiment Run End Time	2012-05-24 01:55:27 AM CST
Instrument Type	sds7500fast
Passive Reference	ROX
Well	Sample Name	Sample Color	Biogroup Name	Biogroup Color	Target Name	Target Color	Task	Reporter	Quencher	Quantity	Comments
A1	jing	RGB(132,193,241)			0849	RGB(139,189,249)	UNKNOWN	SYBR	None
A2	jing	RGB(132,193,241)			0849	RGB(139,189,249)	UNKNOWN	SYBR	None
A3	jing	RGB(132,193,241)			0849	RGB(139,189,249)	UNKNOWN	SYBR	None
A4	ye	RGB(168,255,222)			0849	RGB(139,189,249)	UNKNOWN	SYBR	None
A5	ye	RGB(168,255,222)			0849	RGB(139,189,249)	UNKNOWN	SYBR	None
A6	ye	RGB(168,255,222)			0849	RGB(139,189,249)	UNKNOWN	SYBR	None
A7	hua	RGB(223,221,142)			0849	RGB(139,189,249)	UNKNOWN	SYBR	None
A8	hua	RGB(223,221,142)			0849	RGB(139,189,249)	UNKNOWN	SYBR	None
A9	hua	RGB(223,221,142)			0849	RGB(139,189,249)	UNKNOWN	SYBR	None
A10	5	RGB(247,255,168)			0849	RGB(139,189,249)	UNKNOWN	SYBR	None
A11	5	RGB(247,255,168)			0849	RGB(139,189,249)	UNKNOWN	SYBR	None
A12	5	RGB(247,255,168)			0849	RGB(139,189,249)	UNKNOWN	SYBR	None
B1	10	RGB(180,255,0)			0849	RGB(139,189,249)	UNKNOWN	SYBR	None
B2	10	RGB(180,255,0)			0849	RGB(139,189,249)	UNKNOWN	SYBR	None
B3	10	RGB(180,255,0)			0849	RGB(139,189,249)	UNKNOWN	SYBR	None
B4	15	RGB(255,204,153)			0849	RGB(139,189,249)	UNKNOWN	SYBR	None
B5	15	RGB(255,204,153)			0849	RGB(139,189,249)	UNKNOWN	SYBR	None
B6	15	RGB(255,204,153)			0849	RGB(139,189,249)	UNKNOWN	SYBR	None
B7	20	RGB(253,138,88)			0849	RGB(139,189,249)	UNKNOWN	SYBR	None
B8	20	RGB(253,138,88)			0849	RGB(139,189,249)	UNKNOWN	SYBR	None
B9	20	RGB(253,138,88)			0849	RGB(139,189,249)	UNKNOWN	SYBR	None
B10	water	RGB(213,244,165)			0849	RGB(139,189,249)	NTC	SYBR	None
B11	water	RGB(213,244,165)			0849	RGB(139,189,249)	NTC	SYBR	None
B12	water	RGB(213,244,165)			0849	RGB(139,189,249)	NTC	SYBR	None
C1	jing	RGB(132,193,241)			0725	RGB(208,243,98)	UNKNOWN	SYBR	None
C2	jing	RGB(132,193,241)			0725	RGB(208,243,98)	UNKNOWN	SYBR	None
C3	jing	RGB(132,193,241)			0725	RGB(208,243,98)	UNKNOWN	SYBR	None
C4	ye	RGB(168,255,222)			0725	RGB(208,243,98)	UNKNOWN	SYBR	None
C5	ye	RGB(168,255,222)			0725	RGB(208,243,98)	UNKNOWN	SYBR	None
C6	ye	RGB(168,255,222)			0725	RGB(208,243,98)	UNKNOWN	SYBR	None
C7	hua	RGB(223,221,142)			0725	RGB(208,243,98)	UNKNOWN	SYBR	None
C8	hua	RGB(223,221,142)			0725	RGB(208,243,98)	UNKNOWN	SYBR	None
C9	hua	RGB(223,221,142)			0725	RGB(208,243,98)	UNKNOWN	SYBR	None
C10	5	RGB(247,255,168)			0725	RGB(208,243,98)	UNKNOWN	SYBR	None
C11	5	RGB(247,255,168)			0725	RGB(208,243,98)	UNKNOWN	SYBR	None
C12	5	RGB(247,255,168)			0725	RGB(208,243,98)	UNKNOWN	SYBR	None
D1	10	RGB(180,255,0)			0725	RGB(208,243,98)	UNKNOWN	SYBR	None
D2	10	RGB(180,255,0)			0725	RGB(208,243,98)	UNKNOWN	SYBR	None
D3	10	RGB(180,255,0)			0725	RGB(208,243,98)	UNKNOWN	SYBR	None
D4	15	RGB(255,204,153)			0725	RGB(208,243,98)	UNKNOWN	SYBR	None
D5	15	RGB(255,204,153)			0725	RGB(208,243,98)	UNKNOWN	SYBR	None
D6	15	RGB(255,204,153)			0725	RGB(208,243,98)	UNKNOWN	SYBR	None
D7	20	RGB(253,138,88)			0725	RGB(208,243,98)	UNKNOWN	SYBR	None
D8	20	RGB(253,138,88)			0725	RGB(208,243,98)	UNKNOWN	SYBR	None
D9	20	RGB(253,138,88)			0725	RGB(208,243,98)	UNKNOWN	SYBR	None
D10	water	RGB(213,244,165)			0725	RGB(208,243,98)	NTC	SYBR	None
D11	water	RGB(213,244,165)			0725	RGB(208,243,98)	NTC	SYBR	None
D12	water	RGB(213,244,165)			0725	RGB(208,243,98)	NTC	SYBR	None
E1	jing	RGB(132,193,241)			0230	RGB(244,165,230)	UNKNOWN	SYBR	None
E2	jing	RGB(132,193,241)			0230	RGB(244,165,230)	UNKNOWN	SYBR	None
E3	jing	RGB(132,193,241)			0230	RGB(244,165,230)	UNKNOWN	SYBR	None
E4	ye	RGB(168,255,222)			0230	RGB(244,165,230)	UNKNOWN	SYBR	None
E5	ye	RGB(168,255,222)			0230	RGB(244,165,230)	UNKNOWN	SYBR	None
E6	ye	RGB(168,255,222)			0230	RGB(244,165,230)	UNKNOWN	SYBR	None
E7	hua	RGB(223,221,142)			0230	RGB(244,165,230)	UNKNOWN	SYBR	None
E8	hua	RGB(223,221,142)			0230	RGB(244,165,230)	UNKNOWN	SYBR	None
E9	hua	RGB(223,221,142)			0230	RGB(244,165,230)	UNKNOWN	SYBR	None
E10	5	RGB(247,255,168)			0230	RGB(244,165,230)	UNKNOWN	SYBR	None
E11	5	RGB(247,255,168)			0230	RGB(244,165,230)	UNKNOWN	SYBR	None
E12	5	RGB(247,255,168)			0230	RGB(244,165,230)	UNKNOWN	SYBR	None
F1	10	RGB(180,255,0)			0230	RGB(244,165,230)	UNKNOWN	SYBR	None
F2	10	RGB(180,255,0)			0230	RGB(244,165,230)	UNKNOWN	SYBR	None
F3	10	RGB(180,255,0)			0230	RGB(244,165,230)	UNKNOWN	SYBR	None
F4	15	RGB(255,204,153)			0230	RGB(244,165,230)	UNKNOWN	SYBR	None
F5	15	RGB(255,204,153)			0230	RGB(244,165,230)	UNKNOWN	SYBR	None
F6	15	RGB(255,204,153)			0230	RGB(244,165,230)	UNKNOWN	SYBR	None
F7	20	RGB(253,138,88)			0230	RGB(244,165,230)	UNKNOWN	SYBR	None
F8	20	RGB(253,138,88)			0230	RGB(244,165,230)	UNKNOWN	SYBR	None
F9	20	RGB(253,138,88)			0230	RGB(244,165,230)	UNKNOWN	SYBR	None
F10	water	RGB(213,244,165)			0230	RGB(244,165,230)	NTC	SYBR	None
F11	water	RGB(213,244,165)			0230	RGB(244,165,230)	NTC	SYBR	None
F12	water	RGB(213,244,165)			0230	RGB(244,165,230)	NTC	SYBR	None
G1	jing	RGB(132,193,241)			actin	RGB(255,191,168)	UNKNOWN	SYBR	None
G2	jing	RGB(132,193,241)			actin	RGB(255,191,168)	UNKNOWN	SYBR	None
G3	jing	RGB(132,193,241)			actin	RGB(255,191,168)	UNKNOWN	SYBR	None
G4	ye	RGB(168,255,222)			actin	RGB(255,191,168)	UNKNOWN	SYBR	None
G5	ye	RGB(168,255,222)			actin	RGB(255,191,168)	UNKNOWN	SYBR	None
G6	ye	RGB(168,255,222)			actin	RGB(255,191,168)	UNKNOWN	SYBR	None
G7	hua	RGB(223,221,142)			actin	RGB(255,191,168)	UNKNOWN	SYBR	None
G8	hua	RGB(223,221,142)			actin	RGB(255,191,168)	UNKNOWN	SYBR	None
G9	hua	RGB(223,221,142)			actin	RGB(255,191,168)	UNKNOWN	SYBR	None
G10	5	RGB(247,255,168)			actin	RGB(255,191,168)	UNKNOWN	SYBR	None
G11	5	RGB(247,255,168)			actin	RGB(255,191,168)	UNKNOWN	SYBR	None
G12	5	RGB(247,255,168)			actin	RGB(255,191,168)	UNKNOWN	SYBR	None
H1	10	RGB(180,255,0)			actin	RGB(255,191,168)	UNKNOWN	SYBR	None
H2	10	RGB(180,255,0)			actin	RGB(255,191,168)	UNKNOWN	SYBR	None
H3	10	RGB(180,255,0)			actin	RGB(255,191,168)	UNKNOWN	SYBR	None
H4	15	RGB(255,204,153)			actin	RGB(255,191,168)	UNKNOWN	SYBR	None
H5	15	RGB(255,204,153)			actin	RGB(255,191,168)	UNKNOWN	SYBR	None
H6	15	RGB(255,204,153)			actin	RGB(255,191,168)	UNKNOWN	SYBR	None
H7	20	RGB(253,138,88)			actin	RGB(255,191,168)	UNKNOWN	SYBR	None
H8	20	RGB(253,138,88)			actin	RGB(255,191,168)	UNKNOWN	SYBR	None
H9	20	RGB(253,138,88)			actin	RGB(255,191,168)	UNKNOWN	SYBR	None
H10	water	RGB(213,244,165)			actin	RGB(255,191,168)	NTC	SYBR	None
H11	water	RGB(213,244,165)			actin	RGB(255,191,168)	NTC	SYBR	None
H12	water	RGB(213,244,165)			actin	RGB(255,191,168)	NTC	SYBR	None

## Sheet: Results
Block Type	96fast
Chemistry	SYBR_GREEN
Experiment File Name	S:\LQW\ZHB\2014-2.eds
Experiment Run End Time	2012-05-24 01:55:27 AM CST
Instrument Type	sds7500fast
Passive Reference	ROX
Well	Sample Name	Target Name	Task	Reporter	Quencher	Cт	Cт Mean	Cт SD	Quantity	Quantity Mean	Quantity SD	Automatic Ct Threshold	Ct Threshold	Automatic Baseline	Baseline Start	Baseline End	Tm1	Tm2	Tm3	Comments	AMPNC	HIGHSD	OUTLIERRG	MTP
A1	jing	0849	UNKNOWN	SYBR	None	24.3035	24.0567	0.214473				TRUE	0.414572	TRUE	3	17	83.6721				N	N	N	N
A2	jing	0849	UNKNOWN	SYBR	None	23.9161	24.0567	0.214473				TRUE	0.414572	TRUE	3	18	83.8508				N	N	N	N
A3	jing	0849	UNKNOWN	SYBR	None	23.9505	24.0567	0.214473				TRUE	0.414572	TRUE	3	18	84.0295				N	N	N	N
A4	ye	0849	UNKNOWN	SYBR	None	26.6174	26.4277	0.181573				TRUE	0.414572	TRUE	3	21	84.2082				N	N	N	N
A5	ye	0849	UNKNOWN	SYBR	None	26.4101	26.4277	0.181573				TRUE	0.414572	TRUE	3	20	84.2082				N	N	N	N
A6	ye	0849	UNKNOWN	SYBR	None	26.2556	26.4277	0.181573				TRUE	0.414572	TRUE	3	20	84.3869				N	N	N	N
A7	hua	0849	UNKNOWN	SYBR	None	25.718	26.1903	0.409289				TRUE	0.414572	TRUE	3	19	84.5656				N	N	N	N
A8	hua	0849	UNKNOWN	SYBR	None	26.4397	26.1903	0.409289				TRUE	0.414572	TRUE	3	20	84.3869				N	N	N	N
A9	hua	0849	UNKNOWN	SYBR	None	26.4134	26.1903	0.409289				TRUE	0.414572	TRUE	3	20	84.3869				N	N	N	N
A10	5	0849	UNKNOWN	SYBR	None	23.9233	23.9334	0.0101861				TRUE	0.414572	TRUE	3	18	84.0295				N	N	N	N
A11	5	0849	UNKNOWN	SYBR	None	23.9437	23.9334	0.0101861				TRUE	0.414572	TRUE	3	18	84.0295				N	N	N	N
A12	5	0849	UNKNOWN	SYBR	None	23.9333	23.9334	0.0101861				TRUE	0.414572	TRUE	3	17	83.8508				N	N	N	N
B1	10	0849	UNKNOWN	SYBR	None	23.5267	23.2359	0.254311				TRUE	0.414572	TRUE	3	17	83.8508				N	N	N	N
B2	10	0849	UNKNOWN	SYBR	None	23.1253	23.2359	0.254311				TRUE	0.414572	TRUE	3	17	84.0295				N	N	N	N
B3	10	0849	UNKNOWN	SYBR	None	23.0556	23.2359	0.254311				TRUE	0.414572	TRUE	3	17	84.2082				N	N	N	N
B4	15	0849	UNKNOWN	SYBR	None	23.094	22.9853	0.094357				TRUE	0.414572	TRUE	3	17	84.3869				N	N	N	N
B5	15	0849	UNKNOWN	SYBR	None	22.9372	22.9853	0.094357				TRUE	0.414572	TRUE	3	17	84.3869				N	N	N	N
B6	15	0849	UNKNOWN	SYBR	None	22.9245	22.9853	0.094357				TRUE	0.414572	TRUE	3	17	84.5656				N	N	N	N
B7	20	0849	UNKNOWN	SYBR	None	23.3525	23.2291	0.10752				TRUE	0.414572	TRUE	3	17	84.5656				N	N	N	N
B8	20	0849	UNKNOWN	SYBR	None	23.1556	23.2291	0.10752				TRUE	0.414572	TRUE	3	17	84.5656				N	N	N	N
B9	20	0849	UNKNOWN	SYBR	None	23.1792	23.2291	0.10752				TRUE	0.414572	TRUE	3	16	84.5656				N	N	N	N
B10	water	0849	NTC	SYBR	None	31.2082	30.6929	0.467853				TRUE	0.414572	TRUE	3	25	84.3869	74.7377			Y	N	N	Y
B11	water	0849	NTC	SYBR	None	30.5756	30.6929	0.467853				TRUE	0.414572	TRUE	3	25	84.2082	74.3803			Y	N	N	Y
B12	water	0849	NTC	SYBR	None	30.2948	30.6929	0.467853				TRUE	0.414572	TRUE	3	24	83.8508	74.3803			Y	N	N	Y
C1	jing	0725	UNKNOWN	SYBR	None	22.302	22.2368	0.0888957				TRUE	0.42448	TRUE	3	16	84.923				N	N	N	N
C2	jing	0725	UNKNOWN	SYBR	None	22.2727	22.2368	0.0888957				TRUE	0.42448	TRUE	3	15	85.1016				N	N	N	N
C3	jing	0725	UNKNOWN	SYBR	None	22.1355	22.2368	0.0888957				TRUE	0.42448	TRUE	3	16	85.2803				N	N	N	N
C4	ye	0725	UNKNOWN	SYBR	None	25.8267	24.1514	2.79934				TRUE	0.42448	TRUE	3	19	85.2803				N	Y	N	N
C5	ye	0725	UNKNOWN	SYBR	None	20.9197	24.1514	2.79934				TRUE	0.42448	TRUE	3	14	77.2393				N	Y	Y	N
C6	ye	0725	UNKNOWN	SYBR	None	25.7078	24.1514	2.79934				TRUE	0.42448	TRUE	3	20	85.6377				N	Y	N	N
C7	hua	0725	UNKNOWN	SYBR	None	23.732	23.97	0.207456				TRUE	0.42448	TRUE	3	17	85.6377	76.1672			N	N	N	Y
C8	hua	0725	UNKNOWN	SYBR	None	24.0655	23.97	0.207456				TRUE	0.42448	TRUE	3	18	85.8164				N	N	N	N
C9	hua	0725	UNKNOWN	SYBR	None	24.1125	23.97	0.207456				TRUE	0.42448	TRUE	3	17	85.6377				N	N	N	N
C10	5	0725	UNKNOWN	SYBR	None	22.8614	23.1716	0.26931				TRUE	0.42448	TRUE	3	16	85.2803				N	N	N	N
C11	5	0725	UNKNOWN	SYBR	None	23.3451	23.1716	0.26931				TRUE	0.42448	TRUE	3	17	85.1016				N	N	N	N
C12	5	0725	UNKNOWN	SYBR	None	23.3084	23.1716	0.26931				TRUE	0.42448	TRUE	3	17	84.923				N	N	N	N
D1	10	0725	UNKNOWN	SYBR	None	22.1665	22.4125	0.214001				TRUE	0.42448	TRUE	3	16	84.923				N	N	N	N
D2	10	0725	UNKNOWN	SYBR	None	22.5558	22.4125	0.214001				TRUE	0.42448	TRUE	3	17	85.1016				N	N	N	N
D3	10	0725	UNKNOWN	SYBR	None	22.5153	22.4125	0.214001				TRUE	0.42448	TRUE	3	16	85.2803				N	N	N	N
D4	15	0725	UNKNOWN	SYBR	None	19.4919	21.6788	1.8967				TRUE	0.42448	TRUE	3	13	77.0607	85.2803			N	Y	N	Y
D5	15	0725	UNKNOWN	SYBR	None	22.6701	21.6788	1.8967				TRUE	0.42448	TRUE	3	17	85.6377				N	Y	N	N
D6	15	0725	UNKNOWN	SYBR	None	22.8745	21.6788	1.8967				TRUE	0.42448	TRUE	3	16	85.8164				N	Y	N	N
D7	20	0725	UNKNOWN	SYBR	None	22.9635	23.2507	0.289352				TRUE	0.42448	TRUE	3	17	85.8164				N	N	N	N
D8	20	0725	UNKNOWN	SYBR	None	23.5422	23.2507	0.289352				TRUE	0.42448	TRUE	3	17	85.8164				N	N	N	N
D9	20	0725	UNKNOWN	SYBR	None	23.2463	23.2507	0.289352				TRUE	0.42448	TRUE	3	17	85.6377				N	N	N	N
D10	water	0725	NTC	SYBR	None	28.8569	28.4834	0.32755				TRUE	0.42448	TRUE	3	22	85.459				Y	N	N	N
D11	water	0725	NTC	SYBR	None	28.3486	28.4834	0.32755				TRUE	0.42448	TRUE	3	22	85.2803				Y	N	N	N
D12	water	0725	NTC	SYBR	None	28.2448	28.4834	0.32755				TRUE	0.42448	TRUE	3	22	84.923				Y	N	N	N
E1	jing	0230	UNKNOWN	SYBR	None	27.216	27.2058	0.162703				TRUE	0.0737595	TRUE	3	24	79.741				N	N	N	N
E2	jing	0230	UNKNOWN	SYBR	None	27.3631	27.2058	0.162703				TRUE	0.0737595	TRUE	3	23	79.9197				N	N	N	N
E3	jing	0230	UNKNOWN	SYBR	None	27.0382	27.2058	0.162703				TRUE	0.0737595	TRUE	3	24	79.9197				N	N	N	N
E4	ye	0230	UNKNOWN	SYBR	None	25.4984	25.5222	0.145115				TRUE	0.0737595	TRUE	3	21	80.277				N	N	N	N
E5	ye	0230	UNKNOWN	SYBR	None	25.3905	25.5222	0.145115				TRUE	0.0737595	TRUE	3	22	80.4557				N	N	N	N
E6	ye	0230	UNKNOWN	SYBR	None	25.6777	25.5222	0.145115				TRUE	0.0737595	TRUE	3	22	80.4557				N	N	N	N
E7	hua	0230	UNKNOWN	SYBR	None	26.4902	26.3227	0.367207				TRUE	0.0737595	TRUE	3	23	80.4557				N	N	N	N
E8	hua	0230	UNKNOWN	SYBR	None	26.5763	26.3227	0.367207				TRUE	0.0737595	TRUE	3	22	80.6344				N	N	N	N
E9	hua	0230	UNKNOWN	SYBR	None	25.9016	26.3227	0.367207				TRUE	0.0737595	TRUE	3	22	80.4557				N	N	N	N
E10	5	0230	UNKNOWN	SYBR	None	32.6302	31.7959	0.738981				TRUE	0.0737595	TRUE	3	29	79.9197				N	Y	N	N
E11	5	0230	UNKNOWN	SYBR	None	31.2238	31.7959	0.738981				TRUE	0.0737595	TRUE	3	28	79.3836				N	Y	N	N
E12	5	0230	UNKNOWN	SYBR	None	31.5336	31.7959	0.738981				TRUE	0.0737595	TRUE	3	28	79.741				N	Y	N	N
F1	10	0230	UNKNOWN	SYBR	None	31.7578	31.5371	0.246867				TRUE	0.0737595	TRUE	3	28	79.2049				N	N	N	N
F2	10	0230	UNKNOWN	SYBR	None	31.2705	31.5371	0.246867				TRUE	0.0737595	TRUE	3	27	79.2049				N	N	N	N
F3	10	0230	UNKNOWN	SYBR	None	31.583	31.5371	0.246867				TRUE	0.0737595	TRUE	3	27	79.741				N	N	N	N
F4	15	0230	UNKNOWN	SYBR	None	29.78	30.5498	0.666729				TRUE	0.0737595	TRUE	3	26	80.4557				N	Y	Y	N
F5	15	0230	UNKNOWN	SYBR	None	30.9385	30.5498	0.666729				TRUE	0.0737595	TRUE	3	27	80.277				N	Y	N	N
F6	15	0230	UNKNOWN	SYBR	None	30.931	30.5498	0.666729				TRUE	0.0737595	TRUE	3	27	79.9197				N	Y	N	N
F7	20	0230	UNKNOWN	SYBR	None	32.4996	33.9833	2.66621				TRUE	0.0737595	TRUE	3	28	79.741				N	Y	N	N
F8	20	0230	UNKNOWN	SYBR	None	32.389	33.9833	2.66621				TRUE	0.0737595	TRUE	3	29	79.741				N	Y	N	N
F9	20	0230	UNKNOWN	SYBR	None	37.0613	33.9833	2.66621				TRUE	0.0737595	TRUE	3	34	75.4525				N	Y	Y	N
F10	water	0230	NTC	SYBR	None	33.3741	34.095	0.645644				TRUE	0.0737595	TRUE	3	29	79.9197				Y	Y	N	N
F11	water	0230	NTC	SYBR	None	34.6201	34.095	0.645644				TRUE	0.0737595	TRUE	3	31	79.9197				Y	Y	N	N
F12	water	0230	NTC	SYBR	None	34.2907	34.095	0.645644				TRUE	0.0737595	TRUE	3	31	79.741				Y	Y	N	N
G1	jing	actin	UNKNOWN	SYBR	None	19.8746	20.1127	0.619003				TRUE	0.211852	TRUE	3	15	85.9951				N	Y	N	N
G2	jing	actin	UNKNOWN	SYBR	None	20.8154	20.1127	0.619003				TRUE	0.211852	TRUE	3	13	85.9951				N	Y	N	N
G3	jing	actin	UNKNOWN	SYBR	None	19.6481	20.1127	0.619003				TRUE	0.211852	TRUE	3	14	86.3525				N	Y	N	N
G4	ye	actin	UNKNOWN	SYBR	None	21.9456	21.9136	0.0605745				TRUE	0.211852	TRUE	3	17	86.5311				N	N	N	N
G5	ye	actin	UNKNOWN	SYBR	None	21.8437	21.9136	0.0605745				TRUE	0.211852	TRUE	3	17	86.7098				N	N	N	N
G6	ye	actin	UNKNOWN	SYBR	None	21.9514	21.9136	0.0605745				TRUE	0.211852	TRUE	3	17	86.7098				N	N	N	N
G7	hua	actin	UNKNOWN	SYBR	None	20.0996	20.147	0.0727173				TRUE	0.211852	TRUE	3	14	86.7098				N	N	N	N
G8	hua	actin	UNKNOWN	SYBR	None	20.1108	20.147	0.0727173				TRUE	0.211852	TRUE	3	15	86.7098				N	N	N	N
G9	hua	actin	UNKNOWN	SYBR	None	20.2307	20.147	0.0727173				TRUE	0.211852	TRUE	3	15	86.5311				N	N	N	N
G10	5	actin	UNKNOWN	SYBR	None	17.8681	18.1298	0.226648				TRUE	0.211852	TRUE	3	12	85.9951				N	N	Y	N
G11	5	actin	UNKNOWN	SYBR	None	18.2634	18.1298	0.226648				TRUE	0.211852	TRUE	3	13	85.9951				N	N	N	N
G12	5	actin	UNKNOWN	SYBR	None	18.2578	18.1298	0.226648				TRUE	0.211852	TRUE	3	13	85.6377				N	N	N	N
H1	10	actin	UNKNOWN	SYBR	None	17.5898	17.5986	0.0327124				TRUE	0.211852	TRUE	3	13	85.459				N	N	N	N
H2	10	actin	UNKNOWN	SYBR	None	17.5713	17.5986	0.0327124				TRUE	0.211852	TRUE	3	12	85.6377				N	N	N	N
H3	10	actin	UNKNOWN	SYBR	None	17.6349	17.5986	0.0327124				TRUE	0.211852	TRUE	3	12	85.6377				N	N	N	N
H4	15	actin	UNKNOWN	SYBR	None	18.7036	18.7109	0.0261345				TRUE	0.211852	TRUE	3	13	86.1738				N	N	N	N
H5	15	actin	UNKNOWN	SYBR	None	18.6892	18.7109	0.0261345				TRUE	0.211852	TRUE	3	13	86.1738				N	N	N	N
H6	15	actin	UNKNOWN	SYBR	None	18.7399	18.7109	0.0261345				TRUE	0.211852	TRUE	3	13	86.3525				N	N	N	N
H7	20	actin	UNKNOWN	SYBR	None	19.7186	19.6325	0.07479				TRUE	0.211852	TRUE	3	14	86.5311				N	N	N	N
H8	20	actin	UNKNOWN	SYBR	None	19.5949	19.6325	0.07479				TRUE	0.211852	TRUE	3	14	86.3525				N	N	N	N
H9	20	actin	UNKNOWN	SYBR	None	19.5839	19.6325	0.07479				TRUE	0.211852	TRUE	3	14	86.3525				N	N	N	N
H10	water	actin	NTC	SYBR	None	22.3564	22.3419	0.104504				TRUE	0.211852	TRUE	3	17	86.5311				Y	N	N	N
H11	water	actin	NTC	SYBR	None	22.2309	22.3419	0.104504				TRUE	0.211852	TRUE	3	17	86.3525				Y	N	N	N
H12	water	actin	NTC	SYBR	None	22.4383	22.3419	0.104504				TRUE	0.211852	TRUE	3	17	86.1738				Y	N	N	N

## Sheet: Raw Data
Block Type	96fast
Chemistry	SYBR_GREEN
Experiment File Name	S:\LQW\ZHB\2014-2.eds
Experiment Run End Time	2012-05-24 01:55:27 AM CST
Instrument Type	sds7500fast
Passive Reference	ROX
Well	Cycle	1	2	3	4	5
A1	1	99879.7	18529.6	59486.7	286879	690.228
A2	1	92472.2	17528.6	62316.2	262566	1650.51
A3	1	87562.8	15753.5	63616	254558	340.397
A4	1	82288.2	15713.9	63913.2	238670	186.748
A5	1	94012.7	15729.1	64339.9	237528	253.373
A6	1	59233.4	12734.4	63271.2	232062	0
A7	1	84344.9	15703.9	68063.5	237822	909.618
A8	1	87199.4	15308.2	67172.6	249858	318.184
A9	1	89797.2	16439.3	69997	275857	57.7803
A10	1	83826.4	13411	58827.6	229260	59.581
A11	1	89945.3	16014.3	65244.4	286526	714.366
A12	1	89898.9	16436.6	57466.7	293271	853.69
B1	1	86968.1	14440.4	51373.7	225022	0
B2	1	99168.7	15902.5	63946.3	260337	0
B3	1	95524.1	17654.5	76577.4	282002	64.516
B4	1	93955.7	17890.2	79177.7	280444	82.1615
B5	1	99495.2	18301.8	81626.5	281613	498.614
B6	1	78291.9	14482.3	71330.8	249845	0
B7	1	80561.4	14417.2	72045.1	252670	0
B8	1	90680.3	15432.6	73320.2	261459	0
B9	1	83008.5	15555.9	69011.6	258700	1347.37
B10	1	77050.8	14657.1	68558.8	260653	0
B11	1	91141.9	14871.8	64817.6	276833	0
B12	1	79381.5	15047.5	59821.3	268860	0
C1	1	46275.9	13300	55993.3	247802	0
C2	1	105284	18875.9	66857.3	268498	285.236
C3	1	89023.2	18071.1	75791.7	278456	655.484
C4	1	99768.2	18177.2	77721.6	261819	193.206
C5	1	85043.6	16284.1	73371.7	245289	0
C6	1	84096.1	16026.8	71176.8	235236	0
C7	1	85252.8	15278.4	68222.9	223828	0
C8	1	92019.1	17042	75199.3	251408	0
C9	1	89576.6	16906.4	71175.5	244366	0
C10	1	96266.4	16406.8	69384.4	247353	82.6745
C11	1	95983	16124.1	65355.8	263712	0
C12	1	105605	18550.2	66698.8	305687	203.369
D1	1	89467.5	16518.3	57398.3	242490	2943.81
D2	1	84285.1	15862.3	64007.5	255344	105.958
D3	1	102397	18284.2	73730.6	270772	533.478
D4	1	96104.6	17184.2	73000.7	255849	0
D5	1	83733	15801.2	69806.6	231777	0
D6	1	83979.8	14357.5	67956.3	228612	0
D7	1	71298.6	12612.7	59842.8	199211	0
D8	1	88839	16638.5	77195.6	263215	0
D9	1	89440.8	16050	72642.3	257449	0
D10	1	90152.5	16170.7	67964.2	255753	0
D11	1	85060.7	14900.4	64466.2	269387	0
D12	1	113786	18807.7	71019	313267	10.5043
E1	1	114650	24025.6	75036.3	289448	936.447
E2	1	134783	23332.3	75153.5	290356	799.108
E3	1	105961	19890.4	75391.8	273848	0
E4	1	113736	19246.5	74226.8	251409	0
E5	1	109087	19496.1	79775	257351	0
E6	1	123078	22209.8	90328.6	292829	0
E7	1	127194	22448.1	93948.6	290084	0
E8	1	111696	20619.2	82802.2	267575	0
E9	1	108165	19331.3	71429.3	243218	0
E10	1	99697.8	18383.8	68593.8	259351	0
E11	1	111427	18625.2	63239.4	255280	107.274
E12	1	88389	9544.22	51710.9	277951	0
F1	1	112960	20897.5	66811.9	291611	0
F2	1	112496	20943.3	71605.3	285356	0
F3	1	135779	22672.8	73308.8	258546	1027.01
F4	1	103456	18861.7	69996	238867	1325.9
F5	1	117096	19801.1	76836.9	258263	0
F6	1	116970	19726.6	79716.8	265731	0
F7	1	118214	20439.8	83445.3	280775	0
F8	1	127678	22327.2	88566.2	301507	3777.73
F9	1	112217	20608.6	79924	280323	0
F10	1	103516	18551.3	70916	264997	0
F11	1	90855.9	16015.6	55579.3	225425	0
F12	1	98879	18566.6	60204.7	271188	0
G1	1	83743.4	19404.2	65452.9	298459	0
G2	1	184449	31869.5	66813.9	273826	779.724
G3	1	100159	18731.3	68624	266413	0
G4	1	112247	21284.8	78780.1	286119	410.559
G5	1	117032	21028.2	79575	280536	98.8039
G6	1	115741	21179.2	83327.7	290420	0
G7	1	122358	22594.7	85952.1	299072	0
G8	1	127348	23509.2	86680	305423	0
G9	1	118675	21045.7	77574.2	283569	0
G10	1	113098	19178.4	68390.5	266667	0
G11	1	119035	21405	71813.5	305649	0
G12	1	103393	18269.8	54011.3	249690	586.04
H1	1	103316	18757.2	55800.6	262402	1751.84
H2	1	107983	20544.9	66958.8	294082	651.182
H3	1	100387	19447.9	70402	287500	0
H4	1	110241	20005	72807.3	280607	20.9422
H5	1	116136	20713.4	74573.2	276021	0
H6	1	135000	23506.9	85466.1	314167	686.305
H7	1	121193	19564.6	66388.8	267386	0
H8	1	145138	23685.1	81019.7	299932	1680.42
H9	1	124823	21873.7	75503.2	294824	736.737
H10	1	126371	22379.6	75154.6	308231	481.6
H11	1	149709	26542.9	77864.5	345732	904.621
H12	1	186587	30471.9	70979.4	333759	3001.74
A1	2	104207	18523	57868.8	280595	644.113
A2	2	92856	17675	62215.3	260886	833.269
A3	2	89399.8	15726.9	63142.3	251411	459.834
A4	2	85839.6	16177.3	64574.2	240602	151.314
A5	2	95451	15966.5	64147.8	235176	617.487
A6	2	61746.1	12788.2	62984.8	228831	0
A7	2	87027.4	16316.6	68177.2	237161	1218.62
A8	2	91223.1	15453.9	67281.3	249283	662.665
A9	2	91053.3	16559.9	70018.8	274546	273.696
A10	2	85753.9	13987.3	58284.2	229367	0
A11	2	91970.4	16549.2	64506.2	282544	651.641
A12	2	92602.6	16567.9	56469.7	287869	456.19
B1	2	90155.6	14900.4	51483.8	225761	76.6277
B2	2	102418	16667.8	64215.5	260979	0
B3	2	97971.3	17903.6	75985.8	279785	289.281
B4	2	97709.8	18111.2	78690.6	278154	0
B5	2	102906	18267.1	80676	279736	250.849
B6	2	80941.9	14685.3	70952.5	248409	0
B7	2	82750.1	14480.4	70761.9	248527	0
B8	2	93263.7	15769.4	73495.7	261229	0
B9	2	85040.8	15562.4	68252.6	255932	967.542
B10	2	77933.2	14833.9	67517.9	257179	0
B11	2	91895.1	14389.9	62808.8	268970	0
B12	2	82000.7	14632.8	58470.6	262761	0
C1	2	47574.5	13323.3	55385.6	243357	0
C2	2	107904	18758.8	67033.2	266837	80.632
C3	2	93429.1	18583	75275.6	276966	0
C4	2	101949	18457	77463.6	260353	231.651
C5	2	88376.8	16695.8	73772.9	246294	0
C6	2	86188.8	16191.5	70446.8	232266	0
C7	2	88431	15674.8	67489.2	221217	0
C8	2	94719.2	17244.3	74142.2	248473	0
C9	2	93443.3	17125.8	71511	245695	1076.16
C10	2	98073.2	16296.9	65519.6	234381	0
C11	2	99021.8	16149.8	65311.2	263253	24.3828
C12	2	108569	18802.3	66228.5	302247	616.753
D1	2	91097.8	16190.6	56657.2	238737	2750.66
D2	2	87152.3	16015.3	63975.5	254400	0
D3	2	104229	18450.7	73755.4	268858	285.135
D4	2	97428.4	17216.9	72314.3	253195	15.6084
D5	2	86196.5	15608.6	69504.8	231455	0
D6	2	86021.4	14597.5	67783.4	227459	0
D7	2	74540.4	12961.7	59939.6	199068	0
D8	2	91931.4	16982.8	76915.4	263261	0
D9	2	90766.8	15776.4	70621.2	248365	0
D10	2	92247	16037.2	67685.7	253575	0
D11	2	86256.2	14709.9	64528.8	268387	0
D12	2	114596	18597.9	69857	308367	0
E1	2	116191	24304.9	74760.3	285552	604.037
E2	2	137321	23208.9	74887.5	286528	360.612
E3	2	110096	19811.4	75414.1	270956	0
E4	2	118076	19574.5	74153.8	249119	4.06232
E5	2	112900	19809.5	79785.9	256952	0
E6	2	126525	22387.5	90034.9	291510	0
E7	2	130986	22784.8	93845.2	288791	0
E8	2	114727	21180.1	82176.8	265909	0
E9	2	112792	19835.7	71536.5	242243	0
E10	2	102930	18599.3	68344.1	257170	0
E11	2	113950	18641.2	62610.8	252643	87.0938
E12	2	90254.7	9530.44	51635.7	277487	0
F1	2	115619	21372.1	66669.8	288726	0
F2	2	115922	20999.3	70645.9	280684	0
F3	2	138493	23206.4	73056.1	258036	686.613
F4	2	106768	19584.7	70150.5	238283	1653.71
F5	2	120766	19935.8	76569.6	256385	0
F6	2	121142	19922.3	80394.9	267949	0
F7	2	120937	20411.4	83363.4	278502	0
F8	2	131121	22446	87378.3	297203	0
F9	2	114697	20728.5	79232.3	278689	0
F10	2	106919	18504.6	70016.8	260375	0
F11	2	92500.7	16347.5	55443.8	223985	0
F12	2	99152.8	18441.3	59385.6	267688	0
G1	2	86337.3	19463.9	63773.4	290472	0
G2	2	203921	34209.7	66312.7	269933	466.751
G3	2	104275	19076.6	67990.3	263485	0
G4	2	116010	22015.8	78443.6	283714	85.6818
G5	2	119885	21124.1	77632.9	271004	966.284
G6	2	120425	21586.1	80559.1	280113	303.909
G7	2	125405	23074.9	84994.4	292269	0
G8	2	130017	23617.7	84466.4	294528	0
G9	2	120853	20892.9	75925.9	277432	0
G10	2	115972	19877.9	68365.9	265896	0
G11	2	122497	21735.2	71467.2	303219	0
G12	2	105445	18485.8	54161.3	249259	596.623
H1	2	106899	19175.9	55122.8	258845	1792.97
H2	2	109207	20609.3	66466.4	289056	115.046
H3	2	102364	20111.5	69909	284100	0
H4	2	112600	20115	72813.8	280419	0
H5	2	119505	20705.1	74657.8	276590	100.603
H6	2	135378	23866.4	85227	314101	657
H7	2	121733	19524	65237.8	261753	0
H8	2	143545	23611.1	80720.6	298972	1454.92
H9	2	124726	21652.9	74463.5	292522	3301.11
H10	2	124888	21959.4	74955.5	304851	3412.73
H11	2	146980	25735.7	76038.5	336800	636.585
H12	2	181452	28722.3	69080.6	322628	2181.24
A1	3	105467	18966.3	57071.7	275476	544.447
A2	3	95371.8	17823.7	60965.7	256097	1089.66
A3	3	91559.2	16352.5	62812.5	248884	362.294
A4	3	87268.2	16119.1	64688.9	238805	164.721
A5	3	98121.1	16097.6	63477.7	232459	512.062
A6	3	63893.6	12887.6	62030.6	226615	0
A7	3	88060.3	16782.7	67786	235454	1821.72
A8	3	91234.4	15698.1	66283.5	243128	453.172
A9	3	93658.3	16652.5	69616.1	272281	22.3012
A10	3	87901.2	14441.1	58352.3	227753	0
A11	3	93822.2	16546.9	63737.6	276515	634.217
A12	3	94493.2	16733.1	56034.5	282626	582.91
B1	3	95188.7	15603.5	51049.6	224067	152.22
B2	3	104415	16603.3	63441.3	259131	0
B3	3	98761.2	17606.3	75160.3	274403	260.145
B4	3	98139.5	18324.4	78171.4	274834	0
B5	3	105387	18791.3	80815.8	279392	249.821
B6	3	81687.9	14915.3	70549.8	244824	0
B7	3	83128.7	14282.6	69734.3	244006	0
B8	3	96845.7	15972.6	73222.5	259690	0
B9	3	85922.6	15274.2	67509.7	253072	565.469
B10	3	78039.1	14636.1	67283.8	254860	0
B11	3	92582.9	14259.1	62417.7	266869	0
B12	3	81445.4	14404.8	57482.6	258761	0
C1	3	48200	13186.2	54041.2	237431	0
C2	3	108641	18994	65963	261984	425.334
C3	3	96807.5	18953.8	74400	272713	139.424
C4	3	104736	18650.2	77265.9	258091	525.403
C5	3	89274.9	16644.9	73473.6	244584	37.3842
C6	3	86163.7	16063.2	69694.1	229772	0
C7	3	89563.7	15918.4	66934.8	218897	0
C8	3	96613.5	17290.5	73860	244982	0
C9	3	94534.4	17033.7	71179.1	242902	37.2343
C10	3	100085	16365.5	65239.3	232328	232.461
C11	3	100068	15990.9	64745.2	261276	0
C12	3	109319	18527.8	65102	295636	388.129
D1	3	92328.9	16564.5	55670.5	235269	2762.87
D2	3	88019.2	16118.8	62859.6	250025	0
D3	3	106972	18487.3	72740.4	265495	573.948
D4	3	99937.4	17253.4	72056.4	250063	0
D5	3	88281.2	15795.8	68904.9	228718	0
D6	3	87368.6	14668	67092.7	224736	0
D7	3	75869.1	13171	60031.3	197153	0
D8	3	94302.3	16908.1	76495.5	259787	0
D9	3	92133.3	15631.5	69440.3	245714	0
D10	3	94214	15856.2	67217.4	251054	0
D11	3	89344.8	14965.2	63798.3	264232	0
D12	3	116582	18561.9	69946.4	305541	0
E1	3	116598	24814.5	73880.1	279066	555.6
E2	3	137640	23150.5	73345.3	280956	630.538
E3	3	110787	20014.8	73685.4	266717	0
E4	3	118506	19524.2	73150	244635	219.365
E5	3	114772	19803.7	79190.4	254804	0
E6	3	126695	22197.1	89148.7	288061	0
E7	3	133217	22766.4	92485.4	284549	0
E8	3	115439	21183.2	80850.1	260762	0
E9	3	113262	19989.4	71423.9	242903	75.2397
E10	3	104822	18614.1	67064.8	253705	376.564
E11	3	114486	18702.3	61886.2	247883	0
E12	3	93001.5	9850.39	51016.3	275095	0
F1	3	115095	20664.8	65012.9	281267	0
F2	3	115902	20866.3	69286.3	274192	517.632
F3	3	138976	23123.7	71540.3	250222	364.642
F4	3	108655	19744.2	70498.7	237608	1468.77
F5	3	120813	19932.9	75865.1	254611	0
F6	3	122447	19963.5	80035	266947	0
F7	3	121945	20695	82222.7	275143	0
F8	3	130641	22051.9	86329.4	291483	0
F9	3	113363	20944.5	78030.6	271445	0
F10	3	107356	18664.1	69346.2	258058	0
F11	3	91477.6	15632.1	54145	217717	0
F12	3	98470	18314.8	58767	264926	0
G1	3	87374.8	19926.5	63352.9	286417	0
G2	3	219440	36226.3	64768.9	263632	623.779
G3	3	104861	18780.8	68126.2	262511	0
G4	3	116928	22075.5	76772	276798	415.914
G5	3	121208	21148.7	77070.3	268577	780.46
G6	3	120774	21736.3	80246.6	277421	62.9721
G7	3	126316	22932.2	84429.8	288983	0
G8	3	129720	23200.6	83565.4	291001	0
G9	3	120006	20694.8	75416.1	274105	0
G10	3	115878	19413	67768.7	264158	0
G11	3	123553	21527	71130.1	301513	0
G12	3	106319	18311.9	53484.2	246885	265.901
H1	3	108827	19191.8	54961.9	257259	2184.47
H2	3	108871	20519.8	66021.4	287707	734.953
H3	3	103154	19822.2	69579.3	280866	0
H4	3	113354	19712.1	72426.8	278317	583.65
H5	3	119894	20917	74410.5	274132	0
H6	3	135771	23699.2	84698.5	311621	412.161
H7	3	122430	19300	64616	259433	0
H8	3	143073	23076.9	80150.9	294946	1716.5
H9	3	124993	21902.7	73738.4	289431	2413.81
H10	3	124633	21782.7	74271.7	301489	2043.15
H11	3	146608	25521.4	75544.4	333320	351.797
H12	3	177080	28573.1	67903.8	319031	2030.99
A1	4	107660	19014.4	56490.1	271974	0
A2	4	96631	17779.2	60084.2	251176	771.46
A3	4	92387.1	15803.8	61887.6	243915	295.608
A4	4	87585.7	16075	64150.1	238805	318.908
A5	4	98541.1	16172.2	62705.9	229396	453.592
A6	4	63604.7	12636.5	60301.9	218411	0
A7	4	88790.8	16975.6	66210.4	227500	1904.57
A8	4	92223.5	15725.9	65164.1	238460	412.851
A9	4	94688	16468.2	69028.4	268523	145.971
A10	4	90733.9	14590.7	58262.9	227263	116.183
A11	4	94497.2	16192.6	62572.8	272193	908.348
A12	4	95060	16680.3	54678.2	276132	980.409
B1	4	98316.2	16049.4	51291.4	224518	152.22
B2	4	105554	16995.5	64045.7	259609	132.894
B3	4	99863.1	17380.7	73594.8	269377	0
B4	4	99090.1	18394.1	77109.8	270109	129.836
B5	4	106852	18873.5	80059.5	274701	479.081
B6	4	83905.7	14765.6	69737.1	241768	0
B7	4	83287.6	14420.5	68481.3	239405	0
B8	4	97273	15633.1	72135.7	255754	0
B9	4	87236.8	15277.4	67283.8	249678	818.69
B10	4	78879.5	14441.1	66500.4	250872	0
B11	4	93110.4	14259.1	62353.4	265621	0
B12	4	79624.4	14410.7	56968.1	255677	0
C1	4	49254.4	13118.1	52272	228610	0
C2	4	108687	18767.1	63987.4	254694	503.95
C3	4	99666.9	18648.3	73820.7	269582	51.3156
C4	4	105761	18869.5	76212.3	254547	528.36
C5	4	90524.5	16718.6	72891	242449	64.4877
C6	4	88318.6	16009.4	68569.1	225385	0
C7	4	90758.7	15975.6	66001	215554	0
C8	4	98621.9	17684	72865	241415	0
C9	4	94665.8	16886.3	70255.2	238584	165.284
C10	4	101882	16673.7	65317.3	232782	183.829
C11	4	100947	16306.6	64517.7	259929	348.009
C12	4	110222	18450.4	63780.7	288528	478.516
D1	4	92944	16097.4	54700	228393	2607.89
D2	4	86719.2	15696.9	61134.3	244197	0
D3	4	107330	18707.8	72106.6	261127	0
D4	4	102789	17390.8	71131.8	246695	0
D5	4	88862.2	15680.4	67953.9	226388	0
D6	4	87667.7	14490.5	65789.6	220054	0
D7	4	76854.4	13243	59261.6	194685	0
D8	4	94734.6	16889.7	75654.9	255749	0
D9	4	90119.1	15042.4	67590	237131	0
D10	4	93244.7	15597.3	65883.8	246066	0
D11	4	87992.7	14731.2	63040.5	261923	0
D12	4	117556	18604.3	69297.1	305184	225.842
E1	4	115620	24176.7	72006.9	270494	549.901
E2	4	137822	22893.9	71032	271656	311.535
E3	4	111153	19891.4	72544.5	260335	0
E4	4	118475	19231.4	70824.4	235922	0
E5	4	115155	19543.3	77865.1	250100	0
E6	4	127728	21795.9	88187.2	283597	0
E7	4	133638	22907.6	91274.9	280923	0
E8	4	115732	20289.1	78983.5	254585	0
E9	4	114520	20401.9	71890.5	242542	562.662
E10	4	103531	18334.4	65646.4	247062	306.645
E11	4	114005	18133.3	60870.2	242320	0
E12	4	95061.6	9882.87	51001.2	274388	0
F1	4	114196	20667.4	64500.7	278675	0
F2	4	114486	20455.6	68362.1	270602	428.346
F3	4	138789	22861.8	71161.6	248396	794.26
F4	4	110271	19951.2	70374.3	238299	1222.18
F5	4	120255	19732.8	74070.3	246621	0
F6	4	124311	20236.3	79768.6	266319	0
F7	4	120301	19923.9	80441.5	268652	0
F8	4	127736	21348.8	84328.4	285320	25.7866
F9	4	113115	20552.5	77633.3	270376	0
F10	4	108709	18083.7	69481.2	257952	0
F11	4	90322.3	15722.7	53683.8	215728	0
F12	4	98626.3	17979.1	58556.4	263719	0
G1	4	88106.7	19293.1	63156.2	285677	0
G2	4	224785	36824	64430.4	261886	795.968
G3	4	105766	19020.4	67744.3	262085	0
G4	4	117244	22127.1	77294.5	278247	1279.87
G5	4	120781	20769.9	76585.7	266846	484.955
G6	4	121872	21620.7	79951.8	276233	0
G7	4	126354	23191.5	84529.4	289222	0
G8	4	129807	23537.1	83479	289839	0
G9	4	119752	20618	75093.2	272006	0
G10	4	117946	19358.1	67666.9	263903	115.2
G11	4	123598	21414.3	71312.3	301862	0
G12	4	107121	18631.7	53366.1	246785	427.293
H1	4	109447	19285.4	54913.1	256027	1617.08
H2	4	108995	20538.9	66258	288176	291.524
H3	4	103701	20092.9	69376.6	280452	0
H4	4	114800	20407.9	72480.1	277969	230.364
H5	4	120126	20797.3	74113.5	273377	107.094
H6	4	135509	23391.5	84785.6	310913	604.062
H7	4	123133	19252.5	64933.4	258613	0
H8	4	143791	23237.6	80082.1	295061	1329.55
H9	4	125690	21567.1	73579.7	288561	2212.11
H10	4	122940	21315.2	73454.7	301185	1536.85
H11	4	145057	25099.9	75525.1	332324	746.871
H12	4	177476	28034.9	67152.2	317306	2037.74
A1	5	107602	18592.7	55477.4	264522	550.397
A2	5	97424.5	17766.3	59142.9	243576	1858.83
A3	5	92437.6	15769.3	60757.3	239584	330.444
A4	5	87969.8	16450.3	64145.4	239153	0
A5	5	98957.2	15950.2	61656.9	223594	467.766
A6	5	64891	12645.5	60129.6	217164	0
A7	5	88342.1	17167.6	66310.9	226237	1695.8
A8	5	94405.6	15872.5	63942	232787	639.875
A9	5	95785.6	16210.7	68069.7	264287	117.588
A10	5	94102.7	15054.1	58651.7	227856	0
A11	5	93932.9	16097.8	61216.8	265281	1331.16
A12	5	95656.1	16154.9	53815.3	269450	505.544
B1	5	101354	16278.3	51690.5	224336	201.924
B2	5	108306	17359	64458.2	262756	65.2814
B3	5	99511.3	17685.2	71838.7	262063	0
B4	5	100579	18158.4	76107.5	265723	172.438
B5	5	106391	18629.8	78775.1	271300	382.442
B6	5	83821.5	14689.5	68928.9	237490	0
B7	5	82518.2	14079.9	67381.4	235429	0
B8	5	96018.7	15857.9	71393.3	252024	0
B9	5	86970.6	15117.8	65551.8	244003	515.851
B10	5	77750.1	14205.9	65240.3	246724	64.6332
B11	5	94469.5	14344.2	62236.9	266635	0
B12	5	78399.7	14062.1	56085.4	252268	0
C1	5	49813.5	13150.8	51650.5	226321	0
C2	5	108163	18060.4	62493.1	247039	370.907
C3	5	97977.2	18166.2	71677.7	260288	103.599
C4	5	105712	18776.2	75225.8	250229	173.491
C5	5	89989.3	16391.4	72171	240334	0
C6	5	88015.2	15699.8	67254.7	220762	0
C7	5	90388.8	16040.6	64864	210038	0
C8	5	98533.4	17523.3	71900.7	237130	0
C9	5	93452.9	17149.5	69286	234995	147.121
C10	5	103232	16920	65551.4	232951	39.8783
C11	5	102207	16444	64426.2	259366	0
C12	5	109845	18632.9	62840	284526	139.567
D1	5	93118.5	16245.8	54597.6	228129	2777.38
D2	5	86131.8	15382.1	59202.1	234718	0
D3	5	108566	18393	71003.2	256440	457.135
D4	5	104120	17593.6	70149.3	243060	46.8252
D5	5	89355.9	15704	67354	223097	0
D6	5	87581.9	14549.7	64813.4	216749	0
D7	5	77761.9	13095.9	59026.4	193630	0
D8	5	95468.7	16589.1	74534.1	253066	0
D9	5	88982.6	14930.8	66611.9	234849	0
D10	5	91102.8	15427.1	64250	239110	0
D11	5	86118.2	14358.4	61551.1	253498	0
D12	5	117875	18701.8	69906.4	305368	0
E1	5	116400	24150.7	71274	269669	681.915
E2	5	136855	22751.8	70170.4	267126	376.616
E3	5	110706	19527.9	70443.5	252452	0
E4	5	116496	18956.7	70389	233720	0
E5	5	114858	19529.8	76581.6	244656	0
E6	5	126390	21668.6	86755.9	279718	0
E7	5	130588	22404.7	88702.4	270577	0
E8	5	113589	19986.1	76772.8	246828	0
E9	5	115116	20175.6	71747.6	242997	0
E10	5	103104	17964.8	65384.1	244402	141.836
E11	5	112993	17984.4	60467.2	240794	0
E12	5	97139.2	10134.9	51028.5	274700	0
F1	5	114046	20547.1	64327.9	278200	0
F2	5	115326	20283	68400.6	268826	189.874
F3	5	138105	22947.5	71050.5	247191	741.892
F4	5	110744	20081.9	70462.6	238185	1839.63
F5	5	118931	19400.8	73646.7	244697	0
F6	5	125013	20633.9	80102.5	266758	0
F7	5	120149	20015.9	80169.5	267105	0
F8	5	127283	21485.4	84136.7	283465	247.121
F9	5	111992	20752.2	77529.4	268945	0
F10	5	109491	18195.4	69597.6	258086	0
F11	5	89310.4	15540.4	53364.2	215114	0
F12	5	98457.1	17856.2	58661.2	264082	10.0752
G1	5	89792	19711.2	63109.7	285498	0
G2	5	232787	38562	64355.6	260794	890.185
G3	5	106696	19098.9	67891.7	262381	0
G4	5	118105	21973.3	77428.6	278381	3224.67
G5	5	120061	21088.5	76620	265497	0
G6	5	123786	21966.6	80017.6	276404	0
G7	5	125627	23520.3	84586.5	288930	0
G8	5	131100	23260.8	83450.9	289688	0
G9	5	120822	20762.8	74794.2	271705	0
G10	5	118738	19679.9	67738.7	263777	0
G11	5	124723	21918.1	71147	300391	0
G12	5	107458	18589.6	53448.4	246604	464.334
H1	5	110351	19732.7	54883	256965	1493.67
H2	5	111224	20442.3	66140.8	287935	648.948
H3	5	105223	20295	69136.7	280037	0
H4	5	115705	20190.8	72199.6	277657	196.675
H5	5	121361	21131.5	74057.1	273603	0
H6	5	136878	23582.8	84637.5	310749	1055.93
H7	5	123630	19473	64797	257988	0
H8	5	143397	23076.9	79842.6	294975	1511.75
H9	5	127104	22089.8	73767.5	288332	1661.92
H10	5	123953	21550.7	74016.8	300768	1222.52
H11	5	145843	25324.2	75446.4	333998	894.849
H12	5	175301	27788	67196.7	317347	2442.93
A1	6	107275	18904.9	55289.9	263312	777.994
A2	6	97929.9	17669.1	58093.9	240613	1491.41
A3	6	92701.3	15760.4	59104.3	231353	1111.76
A4	6	88193.1	16321.7	64374.9	239148	205.902
A5	6	100616	16127.6	61648.2	223652	473.082
A6	6	65228.6	12772.7	60020.4	216971	12.7068
A7	6	88873.4	17244.1	66377.6	225638	2065.28
A8	6	94711	15974.4	63998.1	232820	793.27
A9	6	94995.3	16221.3	66549	257683	0
A10	6	95353.4	15232.7	58996.8	228487	53.6229
A11	6	94029.4	16064.6	60869.1	263432	1292.83
A12	6	95783.1	16443.3	52424.8	263285	481.534
B1	6	103554	16433.4	52029	224229	560.211
B2	6	110237	17561.1	65303	264198	31.475
B3	6	99330.9	17262.8	70514.3	256126	316.336
B4	6	101750	17975.7	74575.9	260306	225.183
B5	6	106043	18093.7	77087.8	263300	261.13
B6	6	83520	14494.1	67346.7	232246	0
B7	6	86209.5	14363.2	66903.7	232498	0
B8	6	96428.9	15306.2	69375.5	244131	0
B9	6	86810.3	15149.6	64575.3	239190	843.498
B10	6	76571	13632.5	63231.3	238155	0
B11	6	96598.2	14738.8	63048.4	266597	0
B12	6	77432.8	13348.4	54261.1	241932	0
C1	6	51780.9	13137	51601.5	226108	190.922
C2	6	109177	18260.4	62448.9	246772	309.425
C3	6	97500.5	18357.3	70737.9	257893	152.01
C4	6	103791	18203.1	73499.1	244034	0
C5	6	88595.2	15773.3	70205.4	231868	56.0763
C6	6	89928.4	15841.5	66526.4	217739	0
C7	6	88860.8	15447.6	63719.7	206674	0
C8	6	98621.9	17261	72031.8	237144	0
C9	6	93227.5	16508	66926.8	226377	315.129
C10	6	104295	17019.6	65790.3	234245	73.9207
C11	6	104267	16731.8	64547.1	260173	82.0149
C12	6	111329	18523.9	62683.7	283283	766.954
D1	6	93763.6	16156.6	54519.1	227690	2581.17
D2	6	87053.4	15252.1	59414.2	234741	9.39947
D3	6	108086	18100.3	69356.2	248957	399.188
D4	6	104269	17314	68709.9	236791	0
D5	6	87778.3	15010	64910.8	214383	0
D6	6	87590.7	14425.3	63312.2	208819	0
D7	6	76743.7	13171	57754.7	188659	0
D8	6	92038.3	16139.2	72790.5	243974	0
D9	6	90135.3	15243.5	66787.6	234916	0
D10	6	87768.5	15016.8	63387.4	235745	0
D11	6	85359.3	13887.2	61113.6	251503	0
D12	6	119466	18665.7	70136.5	306052	0
E1	6	116473	23897.4	71162.1	268973	815.829
E2	6	138004	22523.8	70259.8	266880	913.266
E3	6	111491	19390.1	69857.6	249969	0
E4	6	115393	18900.3	69973.1	232077	0
E5	6	113261	19098.8	74603.2	238376	0
E6	6	123145	20899.2	84393.2	271169	0
E7	6	129683	21893.1	88257.7	269833	0
E8	6	113456	19980.9	76777	245572	0
E9	6	116807	20503.6	71904.6	242985	224.629
E10	6	103076	18026.1	65110	243209	0
E11	6	113778	18065.8	60304.3	240188	121.082
E12	6	97262.3	10664.5	51226.8	274187	0
F1	6	114052	20676.5	64309.5	278223	0
F2	6	114819	20231.6	68325.8	268099	0
F3	6	138458	22699.4	70944.3	246966	465.501
F4	6	111989	20329.5	70439.5	238392	1921.82
F5	6	119044	19526	73698.2	244014	0
F6	6	126467	20557.6	80522.5	267078	0
F7	6	119651	19982.7	79812.7	265349	0
F8	6	128889	21750.3	84004.2	282915	0
F9	6	113573	20678.8	77511.8	268179	0
F10	6	109785	18226.9	69538.9	257550	0
F11	6	89707.8	15149.5	53194.6	214263	0
F12	6	99644	17922.4	58719.6	264793	0
G1	6	91250.2	19836.2	63293.4	285470	0
G2	6	243727	40018	64439.1	260121	841.452
G3	6	106802	19069.8	67894.6	262361	0
G4	6	118465	22220.3	77621	278379	3851.22
G5	6	120090	20914.1	76210.6	264647	327.231
G6	6	125166	22405.4	80040.8	276304	101.303
G7	6	126377	23346.8	84564.8	288427	0
G8	6	132761	23982.1	83816	289566	0
G9	6	121414	20727.4	74928.3	271473	0
G10	6	119704	20180.3	67889.9	264262	156.8
G11	6	125237	21853.2	71217.3	300102	0
G12	6	108771	18748.1	53196.1	246145	496.084
H1	6	112247	20015.1	55161.6	256455	1922.05
H2	6	111856	20728.5	66039.4	288607	34.6255
H3	6	106291	20375.9	69266.7	279397	0
H4	6	116277	20408.8	72213.6	277814	52.8108
H5	6	122627	20882.1	74213.9	273090	0
H6	6	137526	23337.7	84796.2	310310	637.148
H7	6	124222	19338.9	64651.8	258005	0
H8	6	143676	23315.2	79977.5	294860	1792.27
H9	6	127451	22223.8	74093.7	288170	1038.82
H10	6	123572	21394.8	73797.2	300551	682.547
H11	6	146158	25114.2	75500.2	333950	886.473
H12	6	174809	27784.4	67142.3	316371	2586.43
A1	7	109290	18770.4	55811	263443	333.213
A2	7	98970.6	17799.1	57939.8	239615	1574.97
A3	7	94356.1	15673.8	58372.3	229595	378.219
A4	7	88568.8	16174.5	64633.4	239245	0
A5	7	100396	16053.9	61640.3	223584	39.8664
A6	7	65844.2	12798.7	59866.7	216797	0
A7	7	88538.6	17763.6	66603.3	225538	1905.39
A8	7	96258.6	16180.8	64080	232390	558.357
A9	7	95629.3	16046.7	65692.1	253107	23.3149
A10	7	96795.8	15247.2	59253.4	228130	0
A11	7	94675.7	15858.9	60844.3	262879	1525.14
A12	7	95261.3	16167.1	52224.9	262023	362.818
B1	7	105191	16954.2	51687.5	224264	607.844
B2	7	112217	17702.2	65729.4	263848	0
B3	7	100571	17270	70189.7	254410	106.139
B4	7	101494	17576.8	73261.7	253858	202.868
B5	7	106051	17939.1	76467.2	261449	226.175
B6	7	83050.1	14193.9	66148	227272	0
B7	7	86139.9	14005.1	65174.8	224877	0
B8	7	96425.1	14922.3	68952.2	241773	0
B9	7	85988.7	14591	62888.1	231502	651.016
B10	7	75653.2	13429.2	62348.1	235000	0
B11	7	98476.7	14874	63166.1	266907	0
B12	7	75965.2	13433.5	54088.8	242002	0
C1	7	53459.9	13256	51775.4	226218	120.24
C2	7	111332	19200.2	63398.5	249686	1033.1
C3	7	98962.4	18602.2	71116	256995	40.6652
C4	7	103961	18129.1	73005.8	241905	415.985
C5	7	86844.2	15596.1	69464.8	228900	70.0954
C6	7	89973.3	15543.1	64643.8	210057	0
C7	7	88456.3	15778.2	63195.8	204485	0
C8	7	99319.8	17465.1	71624.2	236413	0
C9	7	93185.8	16441.3	66497.9	224631	262.456
C10	7	105845	16946.3	66289.3	234158	46.6868
C11	7	106022	16635.1	64704.9	260422	135.214
C12	7	113816	19193.6	63015.6	284183	660.617
D1	7	93145.2	16086	54359.8	226919	2543.77
D2	7	88289.1	15164.6	59448.8	234243	19.6534
D3	7	109313	18212.8	69060.5	246825	485.649
D4	7	105524	17117.9	68698.1	235333	138.525
D5	7	88377.8	14946.4	64663.9	212560	0
D6	7	88700.5	14189.6	63411.3	207334	0
D7	7	77037	12919.7	57758.8	187695	0
D8	7	91501.8	15987	72046.9	242512	0
D9	7	91923.9	15428.5	67094.2	235483	0
D10	7	88291.5	14607.4	63276.2	234184	0
D11	7	85665.8	13819.4	60834.8	250856	0
D12	7	119836	18911.6	69846.8	305490	0
E1	7	117735	24239.3	71117.9	268794	983.934
E2	7	139752	22683.5	70245.8	266741	589.996
E3	7	113193	19584.8	70070.4	249494	148.13
E4	7	115731	18777.6	69729.1	231432	0
E5	7	111456	18945.4	74215.4	236390	0
E6	7	123111	20751.5	84081.4	269612	0
E7	7	130679	22121.2	88229.6	268500	156.59
E8	7	113650	19924.5	76994	244324	0
E9	7	116915	20347.8	71978.2	243278	306.411
E10	7	103760	18085.4	64934.8	242765	0
E11	7	114486	17946.9	60220.8	240053	387.674
E12	7	98961	10425.3	51468.4	275145	0
F1	7	116822	20721	64361	278630	0
F2	7	115940	20361.1	68146.6	267669	0
F3	7	139141	23168	71067.2	247014	628.426
F4	7	113566	20249.3	70855.9	238904	1645.88
F5	7	119765	19720.4	73809.9	243785	0
F6	7	127625	20596.2	80595.6	267832	0
F7	7	119325	19808.1	79609.9	265438	0
F8	7	129931	21638.9	84572.9	284137	0
F9	7	112760	20898	77529.4	268294	0
F10	7	109328	18246.4	69718.5	257571	0
F11	7	89923.9	15240.1	53112.9	213887	0
F12	7	100214	18240.4	58903.7	264404	0
G1	7	92864	20101.6	63303.7	285937	0
G2	7	250051	40759.5	64614.9	260426	741.821
G3	7	106781	19288.1	67768.2	261603	0
G4	7	119329	22294.5	77880.9	278820	3849.43
G5	7	121329	20932.4	76319.2	264829	329.044
G6	7	128033	22419.1	80701	276658	0
G7	7	128308	23811.5	84839.7	288884	0
G8	7	134278	24231.5	83480	289428	0
G9	7	123091	20993.4	75052.5	272151	0
G10	7	120460	20025.4	68033.5	264594	0
G11	7	126319	21732.5	71329.3	300025	0
G12	7	111004	18670.9	53646.2	245521	714.361
H1	7	113301	19751.7	55196	257345	1764.6
H2	7	113399	21077.9	66421.4	288808	661.234
H3	7	107805	20136.4	69694.2	280328	0
H4	7	116983	20206.9	72318.3	278525	230.364
H5	7	122160	21209.7	74207.2	273766	0
H6	7	137965	23752	84812.7	310547	550.179
H7	7	124765	19469.5	64863.5	258529	0
H8	7	144188	23148.1	79988.5	294799	1309.7
H9	7	127659	22188.2	73709.4	288805	1288.82
H10	7	123656	21422.5	73817.7	301678	777.969
H11	7	146026	25247.1	75222.8	333211	721.742
H12	7	176343	28102.4	67435.7	316522	2821.1
A1	8	111661	18908.2	55690	264157	618.825
A2	8	100360	18011.1	58456.5	239657	1390.69
A3	8	94499.4	15400.9	58221.6	229320	745.489
A4	8	88506.4	16212.9	63968.6	237917	0
A5	8	100532	16041.1	61753.4	223793	315.388
A6	8	65309.6	12736.8	59951.6	216948	0
A7	8	88628.4	17726.9	66773.8	225663	1688.34
A8	8	95693.4	16271.7	64330.1	233744	834.467
A9	8	94655.7	15929	65366.6	252428	135.834
A10	8	98842.4	15267.5	59222.3	229245	196.617
A11	8	94492	16334.3	60839.8	262406	1468.22
A12	8	94257.9	16450.1	51874.4	261068	325.469
B1	8	106877	16748.1	52238.9	225312	396.6
B2	8	113874	17900.7	65661.2	264435	262.292
B3	8	103629	17312	70957.5	254946	0
B4	8	103007	17722.2	73117.8	252718	319.517
B5	8	105250	18123.4	76369.6	260502	234.4
B6	8	82680.2	14146.5	65512.7	226063	0
B7	8	86956.5	14144.7	64643.8	222795	0
B8	8	96225.2	15226.7	68465.1	240948	0
B9	8	87924.4	14954.2	62715.5	230437	444.847
B10	8	77146.2	13753.7	62694.1	234850	14.2573
B11	8	99896.6	14711.6	62814.2	267311	0
B12	8	75542.5	13313	53890.5	242200	0
C1	8	54936.3	13759.5	51834.2	226069	0
C2	8	113455	19263.4	63850.7	251876	2579.22
C3	8	100812	18779	71158.7	256968	502.506
C4	8	102638	17684.8	72481	240720	169.548
C5	8	87906.8	15846	69366.6	228313	0
C6	8	89508.7	15538.3	64120.4	208341	0
C7	8	88590.1	15798.5	63260.9	203848	0
C8	8	98683.9	17466	71772.5	236848	0
C9	8	93619.9	16665.1	66938.6	224298	375.067
C10	8	106292	17124.8	66566.7	234969	235.379
C11	8	106001	16760.8	64960.7	260597	34.3576
C12	8	115295	19281.6	63248.8	284263	252.55
D1	8	92680.3	16237.7	54394.4	225818	2292.6
D2	8	89878	15688.1	59224.6	234397	0
D3	8	112125	18513.8	69153.6	246971	607.981
D4	8	105361	17090	68559.9	234867	337.532
D5	8	90026.8	15095.4	64769.2	213243	0
D6	8	89484	14284.4	63246.5	207848	0
D7	8	77172.4	13059.5	58064.9	188206	0
D8	8	92615.6	16158.6	71992.4	241582	0
D9	8	92805.2	15203.5	67451.2	235329	0
D10	8	88316.5	14870.7	63167.7	233518	0
D11	8	85786.1	13671.4	61058.1	251007	0
D12	8	121307	18894.6	69822.1	306311	0
E1	8	118960	24394.5	71085.4	269006	929.798
E2	8	142347	23228.7	70505.3	267567	82.1513
E3	8	114012	19492.2	70089.8	249379	0
E4	8	117424	18890.3	69696.1	231624	103.589
E5	8	112453	18947.4	74183.6	236360	0
E6	8	123175	20913.8	84352.9	269618	0
E7	8	131455	22519.8	87927.6	268919	126.816
E8	8	113338	19833.6	76430.7	244705	0
E9	8	118458	20623.8	72233.7	243843	129.761
E10	8	105360	18380.9	65168.7	243567	260.698
E11	8	114529	18229.8	60472.4	239857	0
E12	8	99683.8	10741.3	51693.9	274903	0
F1	8	118332	20907.9	64587.7	278545	0
F2	8	116826	20697.2	68692	266995	158.228
F3	8	140939	23416	71196.1	247588	786.502
F4	8	114193	20498.9	71096.7	239807	1903.23
F5	8	120289	19575.3	73748.7	243747	0
F6	8	129425	20537	80992.5	268171	0
F7	8	119886	19872.6	79778.5	264870	143.277
F8	8	131892	21865.9	84437.2	284099	179.431
F9	8	113474	21125.9	77625.7	268705	0
F10	8	110620	18564.3	69432.2	257064	0
F11	8	90124.6	15225.4	53266	214110	0
F12	8	100283	18214.4	59028.3	265168	0
G1	8	94243.6	20276.6	63869.2	286516	0
G2	8	256950	42394.1	64901.3	262033	1308.2
G3	8	107454	19408.4	67669.6	260996	0
G4	8	119818	22474.5	77792.4	278098	4133.26
G5	8	122682	21296.6	76772.3	265048	323.605
G6	8	128614	22917.9	80453.4	277186	275.617
G7	8	129465	24134.5	85003.3	288903	0
G8	8	134494	24618.5	84145.5	290441	0
G9	8	124418	21339.4	75176.7	271878	0
G10	8	121333	20137.3	68327.3	264401	0
G11	8	128036	21763	71252.5	300037	0
G12	8	110750	18868.7	53975.4	247034	545.031
H1	8	114701	20221.3	55186	258266	1703.61
H2	8	113170	20788.1	66461.9	289330	357.424
H3	8	108847	20706.7	69861.6	281204	0
H4	8	118529	20784.1	72676.4	278865	208.512
H5	8	122976	20938.7	74574	273786	198.772
H6	8	138661	23939.5	84867.9	311254	422.56
H7	8	125832	19364.9	65186.2	259257	0
H8	8	145394	23358.1	80334.4	295409	1684.93
H9	8	127659	21975	74281.5	290188	1008.52
H10	8	124209	21523	73919	301613	757.762
H11	8	146272	24944.2	75403.6	334233	879.493
H12	8	176330	27640.5	67476.9	317402	2599.94
A1	9	111233	19241.9	55791.8	264788	647.089
A2	9	101801	18436.2	58437.7	239865	1841.66
A3	9	96065.8	15740.7	58573.9	228877	303.57
A4	9	88552.9	16248.6	64390.8	238169	281.559
A5	9	100802	15956.2	61891.1	223876	379.174
A6	9	65156.9	12635.7	60278.3	217009	0
A7	9	88292.7	17795.5	66582.7	224716	2119.96
A8	9	95970.3	16169.8	64488.8	233840	717.011
A9	9	94660	16062.2	65129.2	251195	201.724
A10	9	100124	15505	59404	229048	29.7905
A11	9	96272.1	16281.8	60884.8	262227	1993.25
A12	9	93370.6	16184.7	51764.4	260153	720.301
B1	9	107304	17061.6	52397.3	225038	855.331
B2	9	116154	17950.9	65967.4	264781	0
B3	9	103383	17505.8	70813.2	255326	490.113
B4	9	103580	17664.3	72997	252973	191.71
B5	9	105645	18131.4	76262.7	259664	66.8245
B6	9	83983.7	13937.6	65724.2	225739	0
B7	9	87607.3	13884.6	64853.7	223167	0
B8	9	95938.2	15121	68867.8	240352	0
B9	9	88834.2	14844.3	62667.3	231234	329.358
B10	9	78187.9	13722.7	62763.1	234814	0
B11	9	100264	14679.9	62675.9	267444	0
B12	9	72525.4	13303.5	53788.5	241131	0
C1	9	55737.8	13793.1	52346.4	225852	204.733
C2	9	114846	19196	64331	251069	3560.91
C3	9	102661	18831.8	71372.5	257633	415.366
C4	9	103919	18119.5	72852.6	241047	113.361
C5	9	89278.3	15944.2	69437.6	228235	156.079
C6	9	90625.7	15269.9	64221.2	207596	0
C7	9	89935.9	15695.9	63469.8	204017	0
C8	9	97743.5	17142.7	71708.4	235803	0
C9	9	95203.5	16676.5	66814.4	224379	338.741
C10	9	107175	17091	66580.2	236090	0
C11	9	107533	16804.8	65138.1	261329	0
C12	9	118001	19288.1	63506.4	284833	439.969
D1	9	94265.1	16112	53933.4	225011	2573.54
D2	9	91268.3	15647.4	59790.8	234302	0
D3	9	114235	18480	69455.7	248039	785.5
D4	9	107248	17419.7	69052.1	235645	0
D5	9	91748	15483.3	65059.8	212925	0
D6	9	91038.8	14287	63356.3	207469	0
D7	9	76115.2	13214.7	57470.3	187235	0
D8	9	92669.1	16299.2	71953.8	241509	0
D9	9	93912.1	15137.7	67245.5	235427	0
D10	9	89327.1	14831.3	63128	233897	0
D11	9	87336.3	13924.7	61290.5	251259	0
D12	9	121389	19088.5	70313.2	306001	0
E1	9	120424	24498.8	71388	269953	556.549
E2	9	143330	22885.1	70655	267875	901.531
E3	9	115437	19915.5	70282.2	250226	47.1322
E4	9	118232	18852	69822.8	231505	0
E5	9	113951	19340.8	74337.7	236626	0
E6	9	123186	20945.8	84393.2	269822	0
E7	9	133092	22562.2	88766.4	269142	161.001
E8	9	114955	20158.5	76494.8	243924	0
E9	9	118946	20974.5	72860.6	244894	246.437
E10	9	106020	18243.5	65344.9	243376	182.788
E11	9	116798	18274.8	60441.1	240071	177.374
E12	9	100645	10605.5	51787	275296	0
F1	9	120145	21144.6	64963.9	279282	0
F2	9	118236	20453.3	68224.8	268195	446.429
F3	9	142708	23524.3	71416.4	247842	950.397
F4	9	115449	20803	71374.7	239532	1970.75
F5	9	122790	19831.4	74186	244304	0
F6	9	128911	20741.6	81104.4	268041	0
F7	9	121573	19715.2	80064.2	264704	0
F8	9	132171	21816.5	84686	284356	0
F9	9	115578	21278.2	78187.1	268770	0
F10	9	111327	18590.3	69604.2	257424	0
F11	9	90663.3	15189.6	53200.8	213711	0
F12	9	100857	18377.5	59345.9	265371	0
G1	9	97583.4	20469.7	63688	287620	0
G2	9	269120	44008.6	65138.8	261627	1218.32
G3	9	108447	19370.5	68022.8	261321	0
G4	9	122064	22850	78062.4	278743	4614.32
G5	9	123943	21188	76600.5	265240	587.385
G6	9	130067	22827.8	80890.1	277066	246.413
G7	9	131536	23946.5	85388.5	288710	0
G8	9	136182	24634.6	84788.3	290309	0
G9	9	125403	21678.4	75564.2	271961	0
G10	9	122210	20032.9	68197.5	265198	92.8003
G11	9	129589	22024.2	71460.7	300837	0
G12	9	113123	18969.7	53725.8	247259	674.674
H1	9	114045	19902.4	55563.6	257531	1581.62
H2	9	114146	21191.2	66891.2	289669	590.867
H3	9	110728	20711.9	69934.2	281280	0
H4	9	118707	20409.8	72722.2	278697	452.534
H5	9	124122	21000.2	74689.3	274507	201.206
H6	9	139384	23751.1	84979.2	311630	705.212
H7	9	126147	19292.3	65053.2	259301	0
H8	9	145853	23452.2	80271.1	295506	1688.54
H9	9	128141	21878.6	74349.3	290343	1556.81
H10	9	124150	21476.8	74111.2	301265	663.463
H11	9	147373	24988.5	76001.3	335065	658.921
H12	9	175829	27859	67742.2	317091	1792.94
A1	10	116151	19499.3	56115.1	264684	1169.22
A2	10	104751	18478.3	58426.6	240486	1712.32
A3	10	97261.9	15913.1	58682.5	229176	575.29
A4	10	89096.8	16253.3	64419.1	238184	87.1491
A5	10	99980.4	16116.5	61755.2	223688	423.47
A6	10	65715.4	12549.3	60090.2	216797	0
A7	10	89116.6	18091.1	66689.8	224256	2187.89
A8	10	96093.6	16247.3	64569	233489	623.221
A9	10	95274.6	15795	64907.5	250675	100.355
A10	10	100032	15479.9	59500.3	229285	204.561
A11	10	97963.6	16400.6	60940	262809	2145.42
A12	10	94888.1	16027.6	52032.6	259262	286.786
B1	10	108097	17167.9	52269.7	225582	452.518
B2	10	115154	17921	65752.5	265220	303.092
B3	10	105274	17595	70873	255135	69.7189
B4	10	104193	17642.7	73425.7	253774	328.646
B5	10	106173	17892.6	76301.8	259169	232.344
B6	10	84635.9	14144.8	65540.8	225921	0
B7	10	88913.3	14002.6	64789.2	223262	0
B8	10	97399	15225.8	68776.7	240177	0
B9	10	89709.2	14713.2	63226.6	231530	601.399
B10	10	79415.7	13730	62997.2	234898	215.761
B11	10	100684	14901.3	63300.1	267846	0
B12	10	74900.4	13255.1	53778.3	240519	0
C1	10	56471.1	13830.2	52412.5	226029	136.489
C2	10	116286	19454	64265.7	252012	4210
C3	10	104460	18972	71648.6	257887	47.4427
C4	10	105577	18083.9	73035.5	241197	437.672
C5	10	90881.4	16041.5	69728.5	228301	0
C6	10	90988.4	15435.4	64107.4	207216	0
C7	10	92024.4	15988.9	63544.6	204417	0
C8	10	97871	17203.7	71587.9	236132	0
C9	10	95277.5	16745	67244.1	225334	422.291
C10	10	107164	17174.6	66651.5	236171	0
C11	10	108722	16940.1	65401.6	261266	395.667
C12	10	118715	19395.8	63312.9	284903	321.669
D1	10	93826.9	16095.7	54215.1	225936	2381.92
D2	10	91872.2	15658.9	59672.2	235069	0
D3	10	115521	19162.5	69889.5	247876	987.853
D4	10	107867	17736.8	68828.5	235329	55.605
D5	10	92972.1	15571.4	65097.1	213342	0
D6	10	91851.1	14529.7	63202.3	207274	0
D7	10	76483.3	12806.6	57312.7	186584	0
D8	10	93862.7	16036.4	72067.7	241548	0
D9	10	94260.6	15276.9	67420.2	235673	0
D10	10	90362.7	15101.9	63609.9	234191	0
D11	10	87726.6	14058.5	61315.7	251421	0
D12	10	121338	19072.6	70194	306494	259.456
E1	10	121843	24763.5	71593.3	269814	1068.46
E2	10	145063	22979.8	71085.8	267963	316.869
E3	10	116309	19956	70317.2	250516	20.1995
E4	10	118705	19074.4	70289.1	231528	15.2337
E5	10	114615	19230.9	74712.5	236427	0
E6	10	125496	20903.1	84422.3	270572	0
E7	10	133725	22670.8	88935.9	269319	667.164
E8	10	116290	19855.6	76800.5	244351	0
E9	10	120083	20852.2	73564.3	245748	393.645
E10	10	106683	18371	65541.7	243774	0
E11	10	118232	18628.4	60756.4	240578	267.654
E12	10	100764	10865.4	52099	276146	0
F1	10	119900	21355.1	64837.7	279440	0
F2	10	117717	20840.7	68144.3	268092	417.044
F3	10	144336	23432.8	71630.8	248321	663.338
F4	10	115957	20674.2	71431.9	239976	1875.83
F5	10	124040	19761.2	74006.2	245031	0
F6	10	129493	20844.8	81009.1	268865	0
F7	10	122242	19999.7	79726.9	265011	0
F8	10	133781	22028.8	84956.3	284352	0
F9	10	116075	21443.4	78241.9	269308	0
F10	10	111142	18450.4	69888.3	257531	0
F11	10	90848.7	15080	53607.2	214496	0
F12	10	100418	18240.4	59393.3	264960	376.142
G1	10	98211.5	20448.9	64153.8	287787	0
G2	10	276674	44329.9	65401.4	262324	1222.65
G3	10	109781	19297.8	67735.6	261841	0
G4	10	122464	22733.3	78224.7	278587	4706.25
G5	10	124821	21246.4	76974.7	265704	303.663
G6	10	130638	23020.8	80978.2	277242	325.812
G7	10	132566	24813.2	85705.8	289805	0
G8	10	138065	24627.1	84771	291310	0
G9	10	126222	21428.1	75987.5	272881	0
G10	10	122858	20056.6	68390.5	265079	0
G11	10	130282	22732.2	71312.3	300545	0
G12	10	111066	18389.1	54040.5	247320	44.9783
H1	10	115252	20329.1	55583.8	259148	2088.02
H2	10	114637	20797.7	66683.9	289690	462.417
H3	10	111301	20998.1	69861.6	281960	0
H4	10	119348	20667.6	72932.6	279164	189.39
H5	10	124821	21035.1	74745.8	274209	214.999
H6	10	139631	24038.5	85350	311698	587.992
H7	10	126866	19440.1	65379.5	259384	0
H8	10	147155	23436.7	80527.9	296180	1715.6
H9	10	128981	22084	74051.1	290102	833.327
H10	10	125064	21631.5	74415	301712	1104.65
H11	10	148028	24845.6	75831.5	335311	798.523
H12	10	177087	27738.2	67795	317065	2868.37
A1	11	115871	19271.8	56343.9	265449	955.014
A2	11	105443	18795.7	58703.8	240356	1633.34
A3	11	98657.5	15760.4	59063.2	229630	316.509
A4	11	91508.5	16421.2	64457.6	238474	93.8528
A5	11	99402.3	16125	61919.2	223688	436.759
A6	11	65102.6	12837.1	60051.5	216097	0
A7	11	91185.2	18338.1	67141.1	225135	1593.07
A8	11	97033.4	16221.2	64850.2	234410	1197.35
A9	11	95493.4	16132.6	65262.7	251079	287.888
A10	11	101083	15597.7	59626.6	229561	204.561
A11	11	100626	16565.2	61043.5	262796	2369.6
A12	11	95719.6	16027.6	52154	259723	801.668
B1	11	106955	16942.3	52854.1	225231	819.088
B2	11	115443	18051.3	66259.8	266091	0
B3	11	105176	17870.8	70789.5	255217	300.728
B4	11	106411	17593.5	73314	253655	369.22
B5	11	107153	18000.6	76403.5	259303	112.06
B6	11	86578.5	14425.6	65950.6	226170	0
B7	11	89961.7	14352.4	64963.9	223323	0
B8	11	99271	15289.9	68689.4	240402	0
B9	11	90596.9	14607.3	63132.7	230931	718.599
B10	11	79292.6	13579.6	62955.2	235235	52.2769
B11	11	101363	14512.1	63062.6	268689	0
B12	11	77991.9	13405.1	54646.3	242405	0
C1	11	58356.2	13679.3	52486.8	226837	79.6183
C2	11	116902	19563.8	64352.1	252257	4002.37
C3	11	105734	18808.7	71573.7	258380	449.254
C4	11	106206	18129.1	73342.9	241311	415.985
C5	11	91106.8	16246.9	69787.4	228962	374.777
C6	11	90710.1	15444.9	64146.4	207167	0
C7	11	92445.8	15907.4	63690.8	204789	0
C8	11	99470.3	17518.7	71793.6	234867	0
C9	11	96820.2	17146	67071	225094	726.522
C10	11	109021	17340	66988.6	236453	0
C11	11	110126	16832.7	65360.2	261006	369.067
C12	11	119639	19615.1	63752.5	285307	721.761
D1	11	94814.5	16270.1	54192.8	226306	2578.12
D2	11	92826	15895	59785.6	234770	90.5767
D3	11	117257	19242.1	70232.2	248354	981.415
D4	11	109047	17744.5	69204.1	236101	252.661
D5	11	93292	15496	65364.4	213712	0
D6	11	93477.3	14612.3	63549	208202	0
D7	11	76984.6	12869.6	57627.9	185997	0
D8	11	95109.8	16287.5	72117.2	241281	0
D9	11	95111.4	15602	67599.7	235258	0
D10	11	90720.3	14926.3	63503.2	234255	0
D11	11	88926	13862.9	61272.3	251708	0
D12	11	121602	18713.4	70317.3	306653	79.8327
E1	11	122886	24930.2	71815.3	270322	940.246
E2	11	146224	23340	71132.1	268039	636.939
E3	11	117501	20111.2	70395.9	249972	0
E4	11	119944	18827.9	70423	232006	9.14022
E5	11	115829	19517.3	74639	236414	0
E6	11	125702	20980.8	85119.4	271018	0
E7	11	136039	22828.3	89011.2	269794	607.615
E8	11	116527	20144.9	76710.8	244771	0
E9	11	120246	20948.5	73290.4	245499	559.391
E10	11	107957	18364.1	65482	243184	0
E11	11	118970	18263	60696.9	240902	163.566
E12	11	101447	10961.8	52284.2	275890	0
F1	11	121453	21628.3	64856.1	278772	0
F2	11	119668	20712.3	68592.3	268191	313.065
F3	11	144646	23912.2	71878.7	247564	807.838
F4	11	117135	20791.1	71510.2	240021	2358.25
F5	11	124836	20144.5	74494	244939	0
F6	11	131030	20847.4	81297.8	269060	0
F7	11	122763	20335.5	79906.2	264924	0
F8	11	133835	22163.3	84946.6	284641	16.1166
F9	11	117809	21176.6	78286.7	268476	0
F10	11	112994	18236.7	69889.4	258594	0
F11	11	92333.8	15441.4	53579.3	214448	0
F12	11	101245	18260.5	59427.4	265446	0
G1	11	100006	20428	64718	287884	0
G2	11	280406	45012.9	65394.9	262232	1543.2
G3	11	110338	19631.5	68031.4	261212	0
G4	11	125224	22922.3	78566.7	278623	4490.26
G5	11	125121	21233.6	76734.2	265554	368.928
G6	11	132368	23204.7	81030.1	277442	396.998
G7	11	134016	24822.9	85878.2	290061	0
G8	11	138901	25047.4	85117.8	290945	0
G9	11	127821	21609.4	75901	272558	0
G10	11	123808	20311.6	68606	265266	0
G11	11	131758	22384.8	71566.2	301904	0
G12	11	112983	19006.1	53866.6	246996	332.045
H1	11	116797	20275.2	55575.1	258419	1931.98
H2	11	115985	21414.1	66982.5	290521	350.722
H3	11	112181	20944.1	69954.3	282493	0
H4	11	121173	20458.1	72840	279296	325.97
H5	11	125378	21159.8	75091.8	274899	158.207
H6	11	142053	23861.6	85390.6	312284	609.734
H7	11	127384	19583.7	65181.8	260517	0
H8	11	147598	23086	80811.4	296641	1684.93
H9	11	129560	22164	74326	290743	1084.27
H10	11	125072	21542.6	74473.1	302126	1341.52
H11	11	148263	25355.7	75981.9	334949	847.384
H12	11	176719	27713.4	67547.8	317313	2515.52
A1	12	117855	19718.4	56525.5	264831	563.785
A2	12	107146	18769.9	59076.3	240990	1919.49
A3	12	99209.1	16290.4	58863.6	229772	598.182
A4	12	92656.7	16559.1	64873.2	238385	322.739
A5	12	99233.6	15951.9	61536.8	223247	635.205
A6	12	66181.9	12810.2	60306.1	216212	0
A7	12	92808.7	18480.7	67543.8	225292	2460.44
A8	12	98882.6	16523.6	65129.6	234894	1382.31
A9	12	97568	16290.8	65670.4	251203	351.75
A10	12	102665	15512.7	59685.9	230039	0
A11	12	100751	16700	61485.7	263604	2359.15
A12	12	97638.1	15997.8	52242.6	260588	748.312
B1	12	108505	17406.6	52300.6	225364	601.631
B2	12	117837	17956.9	66044.9	265983	59.4527
B3	12	107431	17566.3	71083.2	255121	0
B4	12	105685	17862.7	73495.1	253743	15.2151
B5	12	109118	18195.8	76759	259609	0
B6	12	86809	14237.9	66407.8	226088	0
B7	12	90178.1	14169.6	65321.1	223136	0
B8	12	100141	15190.6	68920.3	240807	0
B9	12	91983.2	14938.7	63260.4	231122	606.532
B10	12	80150.2	13720.9	63125.9	235389	0
B11	12	102000	14811.9	63887.3	268943	0
B12	12	78868.3	13585.9	54872.9	242681	0
C1	12	59243.5	14022.4	52593.8	226953	0
C2	12	119271	19639.5	64585.3	251872	3890.49
C3	12	106295	19002.7	71824.5	258206	142.328
C4	12	107119	18338.7	73122.5	241479	296.71
C5	12	92430.4	16076	70006.2	229434	0
C6	12	91377	15676.1	64293.5	207555	0
C7	12	93330.2	16214.5	64206.7	205262	0
C8	12	100201	17512.2	71822.3	235122	0
C9	12	97827.7	16940.7	67534.3	225862	751.951
C10	12	109098	17314.7	67050.3	236638	0
C11	12	110245	16635.1	65655.2	262243	176.221
C12	12	121541	19390.5	63466.7	285740	388.129
D1	12	96607.1	16352	54082	226181	2433.83
D2	12	93653.8	15817.2	59769.1	235210	0
D3	12	117787	19437.9	70122.6	248554	1149.74
D4	12	111114	17732	69304.1	236138	0
D5	12	94366.7	15553.2	65385.8	213408	0
D6	12	92985	14644.5	63697.6	207656	0
D7	12	77715.6	13067.6	57507	186139	0
D8	12	95679.9	16097.5	72416.2	242465	0
D9	12	96082.5	15357.9	67518.2	235203	0
D10	12	91552.6	15062.5	63668.6	234723	15.5714
D11	12	90092.9	13924.7	61179.3	251934	0
D12	12	121880	18787.6	70350.2	306771	0
E1	12	123425	25251.2	71857.5	270741	887.06
E2	12	147920	23397.3	70893	268041	780.971
E3	12	118387	20090.9	70649.5	250301	0
E4	12	120595	19287.8	70441.5	231761	77.1841
E5	12	116997	19323.5	74993.9	236081	0
E6	12	126678	20839	84871.9	270667	0
E7	12	136910	22812	89097.6	269638	479.696
E8	12	116988	20163.7	77234.6	245127	0
E9	12	120937	21031.9	73644.4	246016	545.215
E10	12	108593	18259.3	65752.1	244266	317.632
E11	12	120385	18492.3	61299.4	241155	643.645
E12	12	103290	10940.2	52476.9	276986	0
F1	12	122540	21297.5	65505.6	279048	0
F2	12	120375	20811.5	68588.9	268760	947.108
F3	12	146405	23854.1	72089.2	248253	948.458
F4	12	117519	20828.7	71803.2	240071	2283.88
F5	12	125415	20380.7	74440.6	244609	0
F6	12	131818	20801.7	81327.4	269537	0
F7	12	123814	20327	80091.5	264924	0
F8	12	135193	22045.6	85113.5	284620	362.086
F9	12	117461	21682	78629.3	268575	0
F10	12	112421	18370.1	70155	258498	0
F11	12	92523.3	15085.3	53852.3	214412	0
F12	12	101974	18082	59655.7	266021	165.682
G1	12	100613	21001.8	64296.2	288105	0
G2	12	288486	46627.4	65388.4	262571	1290.88
G3	12	112613	19341.4	68289.9	262196	0
G4	12	125373	22985.7	78481.9	279524	4861.55
G5	12	126627	21596	77470.4	266047	595.543
G6	12	133752	23374.9	81159.9	277383	366.881
G7	12	136045	25149.7	86147.2	289970	236.332
G8	12	140030	25106.5	85302.6	291434	0
G9	12	129352	21778.9	75996.4	273004	0
G10	12	125043	20642	68735.8	265387	0
G11	12	133907	22318.5	71874.7	301513	0
G12	12	113806	18741.1	54047.1	247156	586.04
H1	12	118594	20549.6	56112.2	259100	1557.5
H2	12	117184	21359.3	66889	290627	737.187
H3	12	113027	20932.7	70485.7	282050	0
H4	12	120522	20738.7	73483.2	279152	620.982
H5	12	126238	21255.4	75185.5	275184	0
H6	12	142102	23867.4	85788.5	312337	1079.56
H7	12	128699	19767.8	65620.9	259921	0
H8	12	147893	23547.2	80616.9	296517	1531.59
H9	12	130542	22191.1	74590.3	290409	1332.38
H10	12	124993	21382.1	75167.1	301988	1210.17
H11	12	149301	24781.3	76251.1	335093	1049.81
H12	12	177311	27780.9	67913.7	317734	2949.41
A1	13	119982	19987.4	56510.7	265827	938.65
A2	13	107874	18812.1	58957.7	241192	2093.47
A3	13	101144	16242.1	59097.5	229664	789.282
A4	13	94797.5	16758	65040.6	238955	320.823
A5	13	99678.8	16152.5	61938.5	223124	627.232
A6	13	67502.2	12896.6	60552.2	216844	0
A7	13	93455.7	19057.6	67916.1	225090	2020.55
A8	13	100665	16842.8	65236.5	235221	1132.49
A9	13	98466.1	16258	65522.9	251567	410.544
A10	13	102717	15501.1	60129.2	230376	364.437
A11	13	102833	17126.3	61729.9	263721	2633.28
A12	13	99374	16651.9	52399.5	261284	308.129
B1	13	108846	17203.7	52593.8	226435	1159.77
B2	13	118733	17965.2	66484	265919	415.003
B3	13	108050	17479.1	71292.4	255448	71.8
B4	13	106919	17899.1	73738.6	254104	273.872
B5	13	108997	18167	76989.2	259247	0
B6	13	87477	14337.7	66351.6	226629	0
B7	13	90673.5	14261.8	65177.3	223375	0
B8	13	101823	15352.2	69342.6	241389	0
B9	13	92140.1	15117.8	63534.6	231978	939.312
B10	13	80156.9	13968	63162.3	235230	74.1381
B11	13	102333	14748.6	63498.4	269246	0
B12	13	79427.3	13888.4	55151.7	243663	0
C1	13	59475.3	14278.5	52565.2	226676	303.85
C2	13	118844	19604.2	64721.9	252227	4741.16
C3	13	107490	18810.6	72341.5	258336	504.442
C4	13	107886	18313.7	73647.3	241806	296.71
C5	13	92044	16215	70077.3	230039	0
C6	13	92960.9	15425.1	64233.3	207691	0
C7	13	94391.4	15990.5	64230.8	205241	0
C8	13	101240	17708.1	72005	235544	0
C9	13	98278.4	17400.5	67423.7	225531	503.117
C10	13	109728	17422.7	67158.2	236935	230.516
C11	13	111219	17300.8	65572.4	262411	24.3828
C12	13	122151	19469.3	63733.3	285017	836.073
D1	13	97636.9	16497.2	54563.8	226216	2525.44
D2	13	94132.9	15878.2	59892.9	235295	40.1614
D3	13	118954	19457.1	70278.2	248489	722.034
D4	13	111879	17729.1	69618.8	236860	182.423
D5	13	95156	15778.5	65525.5	213858	0
D6	13	94601.6	14682.8	63803	207900	0
D7	13	78518.3	12960.9	57686.3	186095	0
D8	13	96159.3	16131.4	72323.1	242923	0
D9	13	95752.8	15724	67487.1	235187	0
D10	13	92451.2	15345.6	63516.7	235228	0
D11	13	89071.9	14022	61681.5	251623	103.222
D12	13	122997	19172.2	70367.6	307468	200.632
E1	13	125316	25312.7	71818.2	270757	678.116
E2	13	148583	23685.8	71559.7	269274	830.048
E3	13	118628	20027.3	70718.5	250621	358.782
E4	13	120794	19336.1	70486.8	232149	0
E5	13	117186	19392.9	75296.1	236464	0
E6	13	127457	21351.9	84987.6	270968	0
E7	13	138372	23180.2	89533.3	269618	636.287
E8	13	117969	20343.4	77296.6	244960	0
E9	13	121533	21349.1	73673.7	246098	410.002
E10	13	109651	18452	65625.8	244035	0
E11	13	120627	18999.1	61073.8	241280	340.941
E12	13	103720	11270	52427.1	276437	0
F1	13	123439	21539.4	65558.3	279369	0
F2	13	122222	20970.2	69064	268628	549.277
F3	13	147617	24146.5	72277	248092	951.367
F4	13	119040	20969.4	72114.2	240172	2190.92
F5	13	126408	20227.9	74427.9	245280	97.4809
F6	13	132438	21045.8	81757.6	269957	0
F7	13	123781	20382	80562.4	265275	0
F8	13	134903	22014	85244.9	284917	153.645
F9	13	118390	21655	79152.4	269277	0
F10	13	113934	18619.6	70011.3	258718	0
F11	13	92796.7	15297	53672.4	214427	0
F12	13	101488	18326.7	59570.8	266157	305.615
G1	13	101916	20719.8	64650.7	288196	0
G2	13	296998	47371.1	65450.2	262714	1254.06
G3	13	113827	19707.1	68269.8	261909	0
G4	13	126458	22968.5	78686.2	279231	4899.93
G5	13	126914	21544.9	77664.4	265895	627.269
G6	13	134185	23224.7	81521.5	277397	587.74
G7	13	138096	25190.2	86557	291178	77.8048
G8	13	140740	25422.6	85638.6	291864	0
G9	13	128766	21648.8	76405.8	273508	0
G10	13	126381	20620.5	68936.2	265607	99.2003
G11	13	136081	22488.3	71794	302318	102.556
G12	13	115592	19303.5	53980.7	247991	173.299
H1	13	121365	20448.1	55740.3	258260	1832.69
H2	13	119439	21012.3	67103.1	290770	851.116
H3	13	116025	21312.2	70535.1	282578	89.8595
H4	13	122537	20642.9	73675.8	279419	76.4846
H5	13	127883	21217.1	75144.1	275172	0
H6	13	142848	23969.3	85706.2	312651	434.849
H7	13	128158	19825.8	65178.3	259939	0
H8	13	149046	23633.9	80884.8	296266	1653.36
H9	13	132782	22763	74700.7	290249	1232.95
H10	13	126765	21374	74699.5	302488	1006.98
H11	13	148117	25277.1	76162.8	335185	467.667
H12	13	179074	27882.1	68271.3	316989	2218.39
A1	14	121480	19799.8	56124	266020	1062.12
A2	14	109911	18957.3	58815.8	241286	2352.15
A3	14	102184	16217.5	59170.9	229522	635.009
A4	14	94801.7	16678.2	64961.6	238689	0
A5	14	100734	16472.1	62030.6	223616	825.678
A6	14	68629.3	12855	60427	216794	0
A7	14	94127	19115.7	68053.7	225774	1960.9
A8	14	101774	17056.7	65380.5	234713	1107.95
A9	14	99515.2	16284	65527.9	251377	1.01369
A10	14	103198	15727	60094.2	230019	367.416
A11	14	103403	16952.6	61652.3	263990	2847.01
A12	14	101294	16944.4	52622.2	260722	636.266
B1	14	110364	17179.9	52726.5	225810	900.894
B2	14	119404	18046.6	66686.2	266934	389.357
B3	14	107877	17969.2	71401.7	256016	454.733
B4	14	107993	18041.5	73883.5	254470	132.879
B5	14	110235	18291.9	76751.8	259262	0
B6	14	89124.2	14270.8	66592.9	226419	0
B7	14	91994.9	14143.9	65373.6	223949	0
B8	14	101925	15320.6	69029.2	241367	0
B9	14	93354.2	15161	63372.1	231562	740.841
B10	14	80866.7	13722.7	63357.2	235416	0
B11	14	103181	14518.6	63480.9	269618	0
B12	14	80578.9	14083.4	55056.5	244502	0
C1	14	60624.4	14318.2	52767	227195	174.673
C2	14	120925	19582.5	64789.3	252073	3795.75
C3	14	108642	19266.8	72213.2	258620	356.305
C4	14	108495	18485.8	73712.6	241798	559.904
C5	14	94117.9	16299.6	70297.9	229963	0
C6	14	92780.7	15453.6	64213	208268	0
C7	14	95097.3	16206.7	64262.9	204897	0
C8	14	101813	17866.9	72235.6	235650	0
C9	14	99327.8	17119.7	67697.5	226276	716.533
C10	14	109802	17475.4	67405.7	236492	0
C11	14	112082	17031.3	66025.3	262478	208.362
C12	14	123050	19852.8	64034.4	285567	507.758
D1	14	98072.7	16730	54693.8	227186	2470.48
D2	14	94986.8	15994.9	60310.2	235743	0
D3	14	119470	19660.2	70673.4	248185	904.153
D4	14	113892	17793.5	69668.8	236059	14.6329
D5	14	95991.4	15823	65560.9	214229	0
D6	14	94854.2	14668	63662.5	208204	0
D7	14	79489.4	13419.1	57569.5	186244	0
D8	14	97893.1	16388.4	72687.5	243218	0
D9	14	96351.1	15357	67712.2	235522	0
D10	14	92636.4	15152.1	63800.6	234555	0
D11	14	89305.4	13950.1	61551.1	252028	0
D12	14	122977	19006.9	70463.2	307490	0
E1	14	126092	25647.3	72005.9	270754	929.798
E2	14	149308	24014	71347.5	269045	1179.99
E3	14	120016	20137.2	70711.7	250954	53.8654
E4	14	122339	19261.6	70713.3	233014	154.368
E5	14	117557	19460.4	75134.1	236450	0
E6	14	127704	21050.7	85103.3	271526	0
E7	14	137400	23059.6	89441.2	269806	489.621
E8	14	118122	20164.8	77345.8	244873	0
E9	14	122688	21289.5	73641.2	246208	486.332
E10	14	109339	18544.9	65900.9	244302	310.64
E11	14	120009	18629.4	61192.9	241652	350.5
E12	14	104349	11145.9	52805.9	277015	0
F1	14	123689	21532.9	65511.7	280304	0
F2	14	121736	20734.5	69174	269056	149.186
F3	14	148347	24162.2	72504.2	248486	756.439
F4	14	119569	21043.6	72264.7	240949	2045.12
F5	14	125997	20376.9	74552.3	245314	0
F6	14	133001	21158.8	82116.5	269978	0
F7	14	124214	20309.9	80562.4	265280	0
F8	14	135284	22108.6	85332.1	284971	81.6574
F9	14	118436	21868.9	79107.6	269741	0
F10	14	112908	18762.8	70257.4	259455	0
F11	14	92781.4	15392.9	53700.3	214134	0
F12	14	102788	18106.8	59550.9	266082	192.549
G1	14	103830	21386.6	64935.4	289076	0
G2	14	299019	48029.5	65671.5	262784	1150.09
G3	14	115332	19829.3	68457.4	262420	50.1935
G4	14	126683	23187.4	78833.9	279830	4587.55
G5	14	128094	21716.5	77673.7	265719	0
G6	14	135101	23428.6	81514.1	277240	282.005
G7	14	138843	25564.3	86910.8	291200	0
G8	14	141851	25501	85710.9	292146	0
G9	14	130577	21791.7	76266.7	273950	0
G10	14	129593	20822.8	68850.5	266121	168.534
G11	14	138273	23127.3	72179.3	302098	0
G12	14	117429	19341.3	54221	247987	813.577
H1	14	123904	20776.4	56212.7	258558	2048.3
H2	14	122933	21875.6	67250.7	291078	289.29
H3	14	119411	21806.8	70404	282967	0
H4	14	124038	20898.8	73477.6	280102	60.095
H5	14	129512	21406.7	75330.8	276104	165.508
H6	14	144727	24349	86004.4	313541	873.479
H7	14	130080	19558.6	65543	260682	0
H8	14	150424	23822.1	81061	297112	1798.59
H9	14	132813	22231.6	74355.1	290862	1418.55
H10	14	126551	21330.2	74589.1	303151	1673.81
H11	14	149342	24864.2	75846.7	336328	524.904
H12	14	179651	28436.3	67941.7	318019	2468.25
A1	15	121752	19972.5	56844.4	266194	949.063
A2	15	110654	18847.2	59292.5	241167	2091.18
A3	15	102421	16217.5	59419.5	230331	256.79
A4	15	95858.9	16884.6	65307.7	239050	278.685
A5	15	102126	16538.1	61999	223868	877.948
A6	15	68918.2	13067.7	60490.8	217200	0
A7	15	94860.2	19488.6	68435	225880	1926.93
A8	15	103251	17284.1	65513.4	234936	1235.05
A9	15	99762.2	16332.2	65823.7	252207	436.9
A10	15	103959	15591.9	60193.3	230777	336.632
A11	15	105332	16889.7	61715.3	263835	2850.49
A12	15	101644	16662.7	52475.4	261462	557.566
B1	15	110899	17079	52503.3	225701	314.795
B2	15	119653	18582.3	66643.4	266180	277.446
B3	15	109052	17890.2	71449.1	256019	0
B4	15	108210	18081.8	73972.1	254556	187.653
B5	15	111193	18195.8	76835	260320	0
B6	15	89837.7	14413.8	66525.4	226839	0
B7	15	91587.9	14320.8	65468.2	223330	0
B8	15	102145	15745	69200	240659	0
B9	15	94260.6	15253	63523.6	232075	1023.15
B10	15	81413.3	13943.3	63396.4	235656	8.5544
B11	15	103505	14919.8	63897.1	269067	0
B12	15	81239.6	13798.6	55259.3	244877	7.10688
C1	15	61023.3	13925	52745.8	227540	114.553
C2	15	121711	19844.6	64944	252788	4112.23
C3	15	109887	19379.2	72049	258995	314.671
C4	15	109436	18483.9	73796.6	242079	570.747
C5	15	94465.1	16147.8	70363.4	229897	0
C6	15	92710.7	15465.5	64596.7	208308	0
C7	15	95834	16019.4	64287.1	204992	0
C8	15	103206	17798.6	72299.7	235350	0
C9	15	98719.6	17110	67946.8	225077	846.399
C10	15	110779	17429.3	67199.6	236250	99.2094
C11	15	111855	17154.8	65680.2	262450	198.387
C12	15	123968	19490.3	64376.6	285418	833.415
D1	15	99309.4	16982.2	54766.9	226468	2336.11
D2	15	96062	16034.7	60334.4	235447	193.116
D3	15	121532	19460.8	70680.8	249199	1015.45
D4	15	117373	18325.9	69601.2	236775	133.647
D5	15	97208.8	15827.6	65739.8	214031	0
D6	15	95687.3	14792.3	63861.5	208664	0
D7	15	80278.7	13140.3	57779.7	186561	0
D8	15	97766.2	16637.6	72752.8	242675	0
D9	15	97733.8	15585.7	67813.2	236031	0
D10	15	93337.8	15139.5	64070.1	235426	0
D11	15	90369.8	14083.8	61576.4	252043	0
D12	15	123237	18879.8	70683.1	306885	49.3702
E1	15	126468	25780.7	72398.8	271315	543.253
E2	15	150473	23411.6	71472.4	268782	889.795
E3	15	119735	20116	71237.5	250350	103.883
E4	15	122766	19370.3	70648.4	233002	63.9815
E5	15	118684	19629.2	75065.5	237200	0
E6	15	128501	21241.2	85445.3	271469	0
E7	15	137679	23280.1	89336.8	269981	667.164
E8	15	118190	20306.8	77528.6	245100	0
E9	15	122795	21305.8	73868.5	246328	585.561
E10	15	110102	18424.4	65869.6	244712	0
E11	15	121631	18340.1	61256.6	241307	565.048
E12	15	104714	11192.2	52869.8	277434	0
F1	15	124676	21487.1	65293.6	280205	0
F2	15	123359	21566.4	69265.9	269216	502.939
F3	15	148674	24429	72416.7	248741	537.265
F4	15	119830	21364.5	72281.8	240644	2430.66
F5	15	127361	20260.2	74747.6	245128	0
F6	15	133342	21348.2	82024	270339	0
F7	15	125832	20257.7	80930.9	266216	0
F8	15	135943	21915.3	85392.4	284221	219.186
F9	15	119230	21905.6	79538.8	270042	0
F10	15	113497	18319.1	70251.9	258980	0
F11	15	93243.3	15581.5	53904	214028	0
F12	15	103066	18530	59694.3	266101	0
G1	15	106984	21358.8	65137.2	289044	0
G2	15	305050	49070.9	65727.9	263295	1142.51
G3	15	117999	20066	68806.8	262709	146.792
G4	15	127841	23226.3	79030	279566	5038.27
G5	15	129046	21648.9	77487.1	266422	226.615
G6	15	134679	23550.6	81374.1	277968	285.656
G7	15	140934	25735	87059.5	291662	453.213
G8	15	144485	25551.6	85779	291817	0
G9	15	132917	22281.5	76343.2	274044	0
G10	15	134633	21470.7	68929.8	266018	4.26668
G11	15	143716	22843.6	72136.3	302226	0
G12	15	121380	19633	54173.2	247831	681.288
H1	15	129036	21847.1	56387.9	259299	2354.69
H2	15	130008	22679.3	67478.3	290749	539.487
H3	15	125822	22311.8	71092.6	282929	0
H4	15	128104	21402.1	73731.9	280813	167.538
H5	15	132671	21668.5	75495.9	275726	111.15
H6	15	149142	24730.6	85990.9	312926	544.507
H7	15	131188	19623.4	65741.6	259969	0
H8	15	152555	23996.5	81145.4	297261	1658.78
H9	15	135511	22754.3	74680.3	290697	1764.19
H10	15	127197	21678.8	74957.8	302887	1014.84
H11	15	148886	25059.9	76313.2	336393	809.692
H12	15	180276	27848.4	68474.1	318303	3108.1
A1	16	121442	20183.3	56609.6	266562	999.64
A2	16	111189	18911.6	59621.9	241999	1856.54
A3	16	104258	16408.6	59659.2	230020	427.984
A4	16	97554.1	17178.2	65358.4	239414	495.122
A5	16	103447	16399.2	62101.6	223512	679.501
A6	16	69817.1	12827.3	60805	217265	0
A7	16	96198.3	19899.8	68685.4	226093	2119.13
A8	16	103844	17724.6	65528	234223	1215.76
A9	16	99694.2	16707.5	66018.6	252526	603.146
A10	16	105314	16058.2	60372.2	230862	283.01
A11	16	105312	16944.6	61910	264478	2769.18
A12	16	103964	16720.9	52847.4	261347	661.609
B1	16	111751	17343.7	52496.1	225839	551.927
B2	16	120051	18058.5	66690.8	267162	339.23
B3	16	110232	17858.5	71278	256386	0
B4	16	108566	18308.7	73713.5	253987	238.37
B5	16	111857	18457.4	76998.4	259593	112.06
B6	16	89588.8	14530.5	66580.6	226417	0
B7	16	92668.1	14157.1	65468.2	223483	0
B8	16	103737	15742.3	69429.9	240890	0
B9	16	94433.5	15294.5	63615	232152	785.326
B10	16	81346.5	13803.9	63014	236165	343.127
B11	16	103016	14805.3	63934.1	269731	0
B12	16	81583	13858.9	55448.6	245246	0
C1	16	63419.7	14450.1	52388	227329	320.098
C2	16	122455	20044.6	64948	252422	4280.55
C3	16	111374	19559.8	72103.4	259402	775.543
C4	16	110069	18804.1	73690.8	241966	0
C5	16	97531	16664.9	70508.4	229681	206.548
C6	16	93659	15652.3	64514.6	207962	0
C7	16	95470.2	16370.4	64606.1	204911	0
C8	16	103678	18019.4	72683.3	235872	0
C9	16	100136	17182	68037.5	226051	287.884
C10	16	112084	17725.4	67387.4	236863	284.011
C11	16	112989	17314.8	66122.1	263253	200.604
C12	16	124012	19281.6	64352.2	286152	747.016
D1	16	101093	17079.6	54864.7	226899	2972.05
D2	16	97015.7	15940.1	60207.2	235573	0
D3	16	122985	19758.1	70438.5	249243	1135.94
D4	16	122257	18704.6	69947.3	237022	4.87763
D5	16	98265.1	15794	65810.6	213998	0
D6	16	96823.6	14828	64088.5	208067	0
D7	16	80676.8	13238.9	57708.8	186342	0
D8	16	98778.6	16452.4	72549.9	242743	0
D9	16	98163.2	15730.7	67941.2	236519	0
D10	16	93257.6	15155.6	64074.6	235348	0
D11	16	90822.2	14014.9	61593.6	251721	0
D12	16	123920	18600	70952.2	307424	0
E1	16	127476	25784.8	72334	271336	495.766
E2	16	150304	23626.3	71743.8	268917	759.633
E3	16	121206	20252.9	70948.9	250511	0
E4	16	122395	19331	70803.9	232578	18.2804
E5	16	118400	19481.6	75444.3	236369	0
E6	16	128680	21299.5	85323.6	270764	0
E7	16	138229	23087.9	89572.6	270441	506.162
E8	16	119127	20306.8	77517.9	245027	0
E9	16	122739	21398.9	74038.5	246263	694.604
E10	16	110356	18584.5	66048.7	244530	62.9271
E11	16	122079	18670.2	61398.6	241920	496.01
E12	16	105025	11145.9	52689.3	277327	0
F1	16	125036	21328.9	65558.3	279888	0
F2	16	123606	21228	69882.8	269857	475.814
F3	16	149827	24164.2	72782.6	248446	1165.69
F4	16	120151	21174.4	72430.3	240916	2104.81
F5	16	128366	20538.1	74896.3	244972	114.683
F6	16	134090	21177.7	82005.5	269430	0
F7	16	125763	20256.8	80631.6	264932	0
F8	16	136777	22428.1	85448.4	285176	226.707
F9	16	119841	21970.4	79793.8	270114	0
F10	16	114046	18523.1	70058.1	258817	0
F11	16	93690.9	15473	54094.3	214634	0
F12	16	102958	18261.6	59794.6	266433	53.7346
G1	16	109624	21682.5	64742.6	288483	0
G2	16	317023	50159.6	65822.3	263220	1394.84
G3	16	121182	20211.5	68748.4	262551	0
G4	16	129310	23131.3	78879.5	279643	4693.76
G5	16	130025	21809.6	77853.8	265771	283.721
G6	16	136751	23497.8	81541.9	277393	245.5
G7	16	144305	25920.1	87378.8	291598	0
G8	16	146393	25822.4	86012.4	292240	0
G9	16	134897	22245	76430.6	273560	0
G10	16	144013	22253	68780.8	266300	419.201
G11	16	150983	24060.7	72111.6	301981	0
G12	16	127217	20159	54663.1	248598	911.471
H1	16	140706	23200.2	55938.5	259320	1977.38
H2	16	141438	23736.9	67516.6	291350	297.109
H3	16	137998	23612.1	71052.3	282790	0
H4	16	132862	21676.1	73566.5	280555	68.2898
H5	16	138186	22356.8	75420.4	275968	68.9619
H6	16	154474	25088.2	86088.6	313212	777.056
H7	16	134282	20202.8	65801.9	259973	0
H8	16	155814	23968.2	81294	297395	1606.46
H9	16	138899	23180.6	75061.7	290747	2036.92
H10	16	127486	21339.4	75205.8	302778	1619.93
H11	16	149474	25069.9	76829.4	336187	861.344
H12	16	179437	28033.1	68254.9	318692	2350.07
A1	17	122984	20185	56450.2	266935	1051.7
A2	17	112715	19259.4	59483.3	241723	2146.12
A3	17	105620	16798.7	59532	230110	641.976
A4	17	96814.4	16818.9	65587.9	239711	216.436
A5	17	104882	16434.4	62320.9	224120	687.475
A6	17	70528.3	12989.5	60723.5	217141	0
A7	17	97191.8	19960.3	68881.4	226360	2106.7
A8	17	105044	17512.4	65715.2	235491	1256.08
A9	17	102407	16504.9	66269	252494	55.7529
A10	17	106439	16028.3	60157.4	230795	404.158
A11	17	107323	16960.6	62000	264567	2157.04
A12	17	104583	16987.7	52558.9	261066	597.583
B1	17	112350	17481.5	52942.6	225887	713.466
B2	17	121962	18658.8	66573	266665	65.2814
B3	17	111373	17972.3	71427.5	255995	17.6899
B4	17	110699	17944.2	73993.2	254406	448.338
B5	17	113962	18623.8	77157.7	260338	0
B6	17	92468.4	14599.8	66766.7	226671	0
B7	17	94022.1	14426.4	65651.5	223636	0
B8	17	105143	15648.4	69606.4	241299	0
B9	17	95500.2	15326.3	63656.4	232175	887.983
B10	17	80908.6	13854.9	63361	235501	205.306
B11	17	104159	15049.5	64149.8	269807	0
B12	17	81504.9	14094	55769.3	246307	0
C1	17	64686.5	14613	52945.1	227578	371.281
C2	17	125875	20178.2	64997.3	253667	4274.5
C3	17	113752	19938.2	72330.8	259071	108.441
C4	17	110378	18465.6	73959.7	242361	563.847
C5	17	102248	16976.7	70739.3	230211	0
C6	17	93976.8	15532.8	64703.2	208764	0
C7	17	96903.6	16252.9	64536.2	205216	0
C8	17	105457	17995.3	72663.2	236528	0
C9	17	101146	17409.3	67916.9	226582	631.166
C10	17	113248	17801.5	67775.6	237341	0
C11	17	114882	17288	65917.5	262999	278.186
C12	17	125959	19659.7	64120.3	285093	431.993
D1	17	102999	17168	54735.4	226377	2791.12
D2	17	99025.5	16160.3	60434	235838	0
D3	17	124853	20024.4	71061.2	248491	1084.43
D4	17	134498	19906.8	70119.9	237404	316.07
D5	17	99830.9	16014.7	65633.6	214281	0
D6	17	97770.6	14935	63685.9	208094	0
D7	17	82598	13356.9	57841.4	186536	0
D8	17	100230	16299.2	72767.7	242749	0
D9	17	100070	15761.2	67856.8	235846	0
D10	17	93448.9	15022.1	63970.6	235037	0
D11	17	90183.5	14004.8	61805.8	252501	0
D12	17	123721	18875.5	70951.2	308041	29.412
E1	17	128160	25884.9	72325.1	271943	919.351
E2	17	152254	23580.1	71881.7	268993	551.587
E3	17	121731	20511.3	71613.5	251089	91.3788
E4	17	123050	19124.7	70926.4	232797	0
E5	17	118881	19427.6	75280.2	237216	0
E6	17	128352	21496.7	85331.6	271048	0
E7	17	139684	22997.7	89791.6	270057	642.903
E8	17	119736	19971.5	77791.6	245414	0
E9	17	123898	21319.8	74481.3	246732	507.05
E10	17	111103	18566.7	66138.8	245089	176.795
E11	17	122529	18839.5	61556.2	241609	580.98
E12	17	105803	11272.9	52968.5	278079	0
F1	17	124651	21399.5	65848.7	279926	0
F2	17	123769	21077.5	69380.4	269833	306.284
F3	17	150279	24472.3	73131.8	248873	831.113
F4	17	120454	20879.2	72767.5	240707	2339.65
F5	17	128651	20360.8	75229.6	244772	164.38
F6	17	134303	21115.8	81882.5	270032	0
F7	17	126306	20131.6	80597.5	265464	0
F8	17	137022	22011.9	85435.5	286261	32.2332
F9	17	119940	22274.9	79940.5	270314	0
F10	17	114100	18832.3	70452.2	258809	0
F11	17	94130.2	15158	53985.7	214749	0
F12	17	103540	18284.1	59813.3	267492	158.965
G1	17	115756	22140.9	64768.5	288990	0
G2	17	321527	50371.9	65806	263411	1239.98
G3	17	126705	20796.4	68815.4	263193	0
G4	17	130805	23292.4	79067.4	279765	4825.85
G5	17	131450	22004	77683.9	265738	488.581
G6	17	138946	23623.5	81798.8	277912	349.541
G7	17	149361	26437.8	87167.9	291859	390.969
G8	17	151617	26459.9	86028.6	292383	0
G9	17	138631	22577.2	76709.8	274045	0
G10	17	161152	23993.2	68981.3	266681	41.6001
G11	17	166317	25837.4	72045.2	302071	0
G12	17	140326	21742.3	54615.3	248285	564.874
H1	17	162099	25643	55918.4	259323	1987.3
H2	17	164422	26572.4	67536.9	291330	571.878
H3	17	159466	25892.2	70811.3	283574	36.5363
H4	17	143469	22730.1	73970.3	280576	184.838
H5	17	148184	23184.7	75814.5	276450	58.4148
H6	17	166252	26149.5	86201.9	313713	864.971
H7	17	139094	20427.6	65966.3	260658	0
H8	17	161765	24544.5	81351.8	297227	1437.79
H9	17	145426	23687.9	74993	291148	2275.55
H10	17	129187	21502.2	75007.9	303385	1256.2
H11	17	152288	25104.2	76480.2	336695	452.31
H12	17	181743	28265.8	67580.7	318732	2468.25
A1	18	124732	20309.5	56436.9	267153	800.307
A2	18	113927	19236	59654	242473	1576.11
A3	18	107186	16375.1	59487	231502	953.509
A4	18	98083.2	16902.4	65481.6	239586	30.6458
A5	18	105589	16766	62617.3	223876	715.824
A6	18	71015.1	13104.4	61031.8	217623	0
A7	18	97586.6	20025.7	68757	226574	1905.39
A8	18	105725	17458.5	66060.1	235441	1001.01
A9	18	101450	16229	66043.4	252595	397.366
A10	18	109797	16465.6	60566.6	231108	172.785
A11	18	108310	17255.4	61811	264019	2561.26
A12	18	105918	17096	53185.2	262504	212.089
B1	18	113991	17565	53067	225449	646.158
B2	18	124042	18353.9	66819.1	267657	252.966
B3	18	113870	18315.7	71718.1	256161	257.023
B4	18	112848	18124	73877.5	254174	505.141
B5	18	115658	18711	77457.7	259867	0
B6	18	93674.6	15037.1	66899.2	227628	0
B7	18	95937.7	14433.8	65619.7	223876	0
B8	18	107021	16034	69545.4	240643	0
B9	18	97840.3	15621.9	63628.5	231961	824.678
B10	18	80926.8	13834.9	63200.5	235959	26.6137
B11	18	104709	14971	63804.5	269455	0
B12	18	81839.6	13886	55752.3	246835	0
C1	18	68316.1	15013.9	53031.6	227623	371.281
C2	18	128692	20755.4	65106.8	252536	4211.01
C3	18	117657	19912.2	72367.8	259350	34.8559
C4	18	111197	18527.2	74409.4	242475	574.69
C5	18	109885	17731.9	70637.4	229963	324.308
C6	18	94640.6	15867.7	64802.3	208507	0
C7	18	97942.5	16753.4	64369	205430	0
C8	18	106714	18154.2	72706.2	236595	0
C9	18	102029	17510.2	68012.1	226170	835.501
C10	18	116399	18201.8	67349.9	236813	186.747
C11	18	117002	17701.3	66124.3	263583	564.13
C12	18	128544	20055	64206.2	285670	515.734
D1	18	106279	17611.6	55088.6	227188	2930.83
D2	18	100503	16412.4	60431.4	235396	40.1614
D3	18	128016	20373.9	70799.6	248979	1025.56
D4	18	155344	21683.8	70205.2	237620	239.979
D5	18	102055	16161	65866.5	214390	0
D6	18	100939	14946.3	64219.1	208335	0
D7	18	84043.5	13310.8	57900.6	186273	0
D8	18	101904	16742.3	73115.2	243061	0
D9	18	101308	15947.1	68118.8	236535	0
D10	18	92869.1	15146.7	64193	235619	0
D11	18	91365.2	14155.7	61923	252507	36.1277
D12	18	124628	18952.9	71009.8	307797	182.775
E1	18	127970	25765	72587.4	272248	1231.82
E2	18	151149	23772.8	72174.6	269815	536.651
E3	18	122411	20643.3	71322	250783	57.7129
E4	18	123616	19411.5	71222.9	233063	265.066
E5	18	119668	19372.6	75500.9	237332	0
E6	18	129513	21345.1	85762.1	271115	0
E7	18	139786	23208.4	89876.9	270479	1136.94
E8	18	120491	20368.5	77169.4	245663	0
E9	18	124587	21517.9	74052.6	246870	858.168
E10	18	111311	18516.3	66360	244528	0
E11	18	122904	18870.5	61464.3	241591	417.413
E12	18	106366	11205	53071.8	277592	0
F1	18	124681	21400.8	65901.4	280571	0
F2	18	123781	21018	69517.6	269915	64.4214
F3	18	151899	24209.5	72884.9	249138	1244.24
F4	18	120419	21335.8	72752.4	241685	2488.39
F5	18	128921	20272.5	74913.8	245530	0
F6	18	134732	21126.5	82237.7	269938	0
F7	18	126432	20124	80848	265660	0
F8	18	136967	21880.6	85699.4	285269	0
F9	18	120258	22616.1	79597.9	270168	0
F10	18	114386	18778	70655.8	259633	0
F11	18	94138.4	15742.7	54015.7	214914	25.7635
F12	18	103875	17983.9	59968.8	266807	0
G1	18	124834	23507.9	65299	289321	0
G2	18	330998	52214.4	65857	263178	1228.07
G3	18	137218	21683	68842.2	263342	0
G4	18	133459	23933.8	79185	279699	4981.15
G5	18	134077	22081.6	77632.9	266051	467.732
G6	18	141360	23949.4	81711.6	278026	204.431
G7	18	157788	26839.9	87625.1	291471	291.768
G8	18	160291	27313.4	86150.6	292070	0
G9	18	146163	23527.2	76632.3	274221	0
G10	18	193057	27096.9	69185	265897	0
G11	18	195674	29226.4	72495.6	302503	0
G12	18	163759	24520.6	54649.8	248140	1158.85
H1	18	197108	30133.6	56377.9	259957	2489.45
H2	18	205076	30918.7	67945.9	291778	580.814
H3	18	197813	29942.3	71434.4	283712	0
H4	18	163256	24900.6	74154.5	280952	393.349
H5	18	168182	25237.9	75799.6	276349	84.3769
H6	18	187488	28147.1	86350	313449	729.79
H7	18	149117	21152.2	65945.3	260803	0
H8	18	173430	25438.5	81421.5	298602	1429.67
H9	18	155521	24940.7	75167.3	291370	1933.7
H10	18	130624	21419.1	74832.6	303613	1654.73
H11	18	155540	25615.7	76906.7	337046	533.28
H12	18	183424	28397.2	68525.2	319235	2442.93
A1	19	127971	20777.7	57111.5	266642	721.467
A2	19	116096	19570.9	59669.5	242324	2227.39
A3	19	108696	16685.4	59568.2	231042	765.395
A4	19	98266.3	17116.3	65747.7	239091	223.14
A5	19	106314	16471.2	62838.3	223743	660.011
A6	19	72414.5	13099.5	60955.4	217716	0
A7	19	98818.8	20335.6	69566.6	226362	2290.61
A8	19	106224	17629.4	65921.3	235465	1109.7
A9	19	102615	16710.3	66408.5	252680	256.464
A10	19	110890	16500.4	60472.3	231030	267.121
A11	19	109950	17712.6	62069.8	264338	2463.69
A12	19	108157	17393.9	52929.6	261077	935.057
B1	19	117678	17939.3	52994	225704	1100.75
B2	19	128152	18862.1	66842.2	266864	0
B3	19	117476	18644.8	71732.5	256322	0
B4	19	117074	18812.6	74337.4	255059	459.496
B5	19	121256	19264	77274.8	260245	0
B6	19	98050.7	15203.7	66875.5	227316	0
B7	19	98872.5	14752.9	65555.1	224352	0
B8	19	110442	16137	69602.6	241189	0
B9	19	101629	15589.3	63529.5	232272	932.468
B10	19	81540.2	13869.5	63409.5	235883	6.65342
B11	19	103324	14802.1	63866.6	269476	0
B12	19	82257.3	14149.5	56065	247505	0
C1	19	73988.2	15695.8	52968.7	227716	0
C2	19	136435	21651.6	65388.2	252906	4232.17
C3	19	126068	20652.7	72543.7	260389	74.5529
C4	19	112076	18752.2	74124.7	243017	574.69
C5	19	125311	19068.9	70598.1	230378	0
C6	19	95180.5	15640.4	65142.1	208824	0
C7	19	100748	16589.7	64785.3	205877	0
C8	19	108582	18454.4	72791.4	236250	0
C9	19	104479	17813.8	68165.3	226298	489.494
C10	19	120224	18278	67307.5	237278	0
C11	19	120673	17981.6	66226.6	263589	348.009
C12	19	132889	20770.6	64385.6	286263	790.88
D1	19	113361	18232.9	54905.5	226828	2643.01
D2	19	106726	16820	60615.8	235868	31.6164
D3	19	135602	21061	71355.9	249473	1297.82
D4	19	193934	25170.4	70327.8	237533	340.459
D5	19	106780	16350	66150.6	214054	0
D6	19	105101	15354.2	64142.5	208475	0
D7	19	88020.7	13622	57997.3	186371	0
D8	19	104972	16702.5	72928.1	242976	0
D9	19	104555	16053.8	68255.6	236010	0
D10	19	94249.3	15042.8	64198.5	235816	0
D11	19	90676.3	13958.2	61700.7	252766	0
D12	19	124357	18880.8	70827.9	307659	0
E1	19	129028	26402.8	72915.5	271628	832.925
E2	19	152939	24088.9	71767.5	268551	692.418
E3	19	123501	20376.3	71338.5	251370	189.491
E4	19	123929	19286.7	71253.7	232980	227.49
E5	19	120198	19653.3	75540.7	236943	0
E6	19	130045	21311.1	85395	270403	0
E7	19	139729	23408.3	89783.7	269839	662.753
E8	19	120674	20289.1	77605.5	245647	0
E9	19	123872	21617.5	74514.9	246808	751.306
E10	19	111859	18683.3	66297.3	245048	276.68
E11	19	123365	18673.4	61681.5	241517	569.296
E12	19	106709	11448.1	53302.1	277813	0
F1	19	126099	21464.9	65819.3	280127	0
F2	19	124727	21029.7	69383.8	269855	204.566
F3	19	152164	24432.9	73062	249181	777.774
F4	19	120677	21184.3	72690.2	241705	2312.25
F5	19	130108	20421.5	75138.3	245470	137.62
F6	19	135110	21073.6	82280.3	269766	0
F7	19	127572	20184.7	80860.7	265551	0
F8	19	136536	22000.4	85761.8	284630	0
F9	19	120452	22421.8	80194.4	270040	0
F10	19	114726	18616.4	70733.1	259782	0
F11	19	93986.8	15180.1	54109.8	214871	0
F12	19	103148	18079.6	59921.4	267040	979.536
G1	19	145518	26309.9	65129.5	290011	0
G2	19	350718	54235.5	65746.4	262624	949.747
G3	19	156406	23725.8	69098.8	263163	0
G4	19	138627	24461.3	79295.4	280225	4769.62
G5	19	139007	22809.2	77852.9	267186	758.705
G6	19	145007	24461	81715.3	277596	456.32
G7	19	174327	28549.3	87576.8	292185	431.817
G8	19	177155	28662.5	86278.1	292477	0
G9	19	160570	24713.8	76655.2	273846	0
G10	19	250815	33591.6	70007.3	266699	0
G11	19	248227	34597.5	72595.8	302609	0
G12	19	206758	29479.7	54757.4	248649	990.845
H1	19	262367	37837.9	56359.2	259296	2129.15
H2	19	276825	39709	67843.3	292374	656.767
H3	19	266996	37231.6	71552.4	283793	0
H4	19	201569	28340.3	73907.7	280475	183.017
H5	19	205163	28731.7	75705.8	276017	0
H6	19	227703	31791.5	86447.8	313406	431.068
H7	19	167139	22854.8	65867.5	260460	0
H8	19	196159	27713.4	81402.2	297363	1427.86
H9	19	178493	26879.2	75456.7	291666	1544.5
H10	19	133667	22251.4	75094.3	303075	1299.98
H11	19	160104	26008.6	76881.8	336869	388.094
H12	19	187755	28951.4	68905.9	319640	3055.77
A1	20	131824	21543.2	57039.2	267541	663.452
A2	20	121320	20402.4	59626.3	242097	1936.66
A3	20	113546	17567.1	59850.1	231214	0
A4	20	99582.7	17204.5	65774.1	240123	99.5989
A5	20	107781	16808.8	62427	223960	807.074
A6	20	73521.4	13454.1	61116.6	218119	0
A7	20	99528.7	20686.2	69566.6	226862	1692.49
A8	20	107114	17713.7	66074.8	235990	924.751
A9	20	104638	16640.9	66335.2	252443	434.873
A10	20	115818	16933.9	60545.2	231265	127.106
A11	20	116227	18045.1	62213.8	264402	2749.44
A12	20	113778	18025	53127	261329	896.374
B1	20	121455	18656.5	53145.2	225857	851.189
B2	20	136410	19995.7	66972.8	267556	89.762
B3	20	126011	19535.6	71958.2	256961	0
B4	20	123849	19633.8	74554.8	255384	216.054
B5	20	130054	19548.3	77667.4	260017	0
B6	20	106496	15987.7	66915	227074	0
B7	20	104238	15263.9	65788.4	224313	0
B8	20	118364	16659	69611.1	241167	0
B9	20	108101	16271.6	63868	232700	1375.6
B10	20	81296.9	13772.9	63770.4	235815	287.048
B11	20	103752	14906.7	63964.6	269693	0
B12	20	82041.6	13694.6	56136.4	248305	0
C1	20	85999.5	17219.2	53059.4	227803	395.654
C2	20	150059	23139.4	65358	253630	4447.86
C3	20	140829	22230.7	72661.3	259727	502.506
C4	20	114056	19117.6	74210.7	243278	609.192
C5	20	152324	21497.4	70870.2	230914	0
C6	20	96509	15796.4	64987.7	208816	0
C7	20	104836	16990.8	64920.3	205957	0
C8	20	112570	18520	73077.4	236778	0
C9	20	108280	18128.8	68231.5	226692	800.991
C10	20	128646	19363.4	67637.9	237380	78.7839
C11	20	126869	18411.1	66213.6	263813	483.223
C12	20	140534	21387.8	64224.1	285603	830.756
D1	20	125509	19737.5	55087.9	227466	2902.58
D2	20	116785	18289.8	60727.4	236216	0
D3	20	146118	22051	71336.6	249590	1175.49
D4	20	261309	31183.6	70559.2	237622	344.361
D5	20	116323	17134	66132.9	214283	0
D6	20	112249	15960.5	64290.2	209176	0
D7	20	93792.7	14263.6	58002.3	186344	0
D8	20	110360	17534.5	73407.3	243284	0
D9	20	111535	16902.3	68409.9	236549	0
D10	20	93971.9	15064.3	64165	236295	0
D11	20	91744.6	14106.1	62019	252808	0
D12	20	124884	18529.1	71023.1	308083	0
E1	20	129476	26273.6	73229.8	271532	1200.48
E2	20	153278	24162.7	72016.3	269689	431.028
E3	20	123603	20519.9	71736	251531	78.8743
E4	20	125359	19290.8	71029.3	233479	201.085
E5	20	120859	19900.2	75575.5	237283	0
E6	20	130306	21141.1	85745	271284	0
E7	20	140479	23481	90464.2	270329	355.085
E8	20	121171	20395.6	77903.8	245846	0
E9	20	124120	22019.1	74226.9	246942	567.024
E10	20	111577	18534.1	66345.3	245401	75.9121
E11	20	123549	18348.7	61577.1	241737	586.29
E12	20	107027	11498.4	53105.7	277604	0
F1	20	126509	21727.7	66224.9	280665	0
F2	20	124284	21377.4	69885	270298	611.438
F3	20	152481	24453.6	73104.2	249625	1147.27
F4	20	121788	21710.2	73035.4	241936	2591.13
F5	20	129594	20573.2	75527.9	245321	0
F6	20	135723	21059.2	82498.6	269639	0
F7	20	126893	20061.4	81124.9	265356	0
F8	20	138017	22079.2	86005.2	285383	0
F9	20	120960	22637.7	80338.8	270344	0
F10	20	114297	18867	70521.9	260134	0
F11	20	93842.4	15409.8	53839.9	215313	0
F12	20	103540	18298.3	60245.5	266994	153.367
G1	20	181161	30010.7	65181.2	289810	0
G2	20	380036	57015	65869	262615	1300.62
G3	20	190724	27080.9	69201.2	263159	0
G4	20	147593	24711	79252.5	280342	4169.85
G5	20	148325	23752.1	78151.8	267104	463.2
G6	20	154445	24764.1	82049.1	278216	199.868
G7	20	204243	31196.8	87793.6	292465	183.814
G8	20	208620	31228.4	86357	292510	0
G9	20	187938	27176.6	76837	274049	0
G10	20	343811	42602.3	70035.2	267068	338.134
G11	20	339099	43998	72916	302769	0
G12	20	277458	38231.1	54801.2	248022	596.623
H1	20	358425	49994.8	56446.8	260054	2505.05
H2	20	386979	51964.4	67504.2	291675	421.09
H3	20	372573	48252.7	71368.9	283928	0
H4	20	266613	35021.6	74083.5	280778	91.9636
H5	20	270705	34819.1	75838.6	276673	306.677
H6	20	300550	38767.7	86303.5	313986	793.127
H7	20	201495	25998.8	65948.8	260451	0
H8	20	238357	32119.8	81509.6	298064	1686.74
H9	20	218798	31119.9	75176.9	291451	2359.83
H10	20	140630	22608.2	75246.8	303665	1979.16
H11	20	167900	27481.6	76770	337039	631.001
H12	20	195135	29779.2	68785.6	319337	2883.57
A1	21	137039	21719.2	56727.7	267730	1298.64
A2	21	130402	21176.5	59839.2	242321	1871.42
A3	21	121514	18036	59815.8	231324	808.193
A4	21	101790	17149.1	65868.1	240693	698.15
A5	21	108661	16710.3	62706.8	223978	552.815
A6	21	75202.4	13313.9	61015	217963	0
A7	21	103015	21137.2	69753.6	226829	1769.53
A8	21	109124	17851	65976.5	235971	1303.42
A9	21	106274	16891.7	66504.4	252791	525.091
A10	21	124143	17833.6	60734.8	231178	421.039
A11	21	123199	19209.7	62341	264330	2263.9
A12	21	122177	18925.5	53080.2	262456	1157.82
B1	21	132100	19642.7	53017.7	226528	1004.44
B2	21	151872	21427	66984.4	267342	0
B3	21	141377	20821.2	72094.3	256694	17.6899
B4	21	138095	20979.6	74367.6	255731	355.019
B5	21	145338	21069.4	77295.4	260693	0
B6	21	121231	17077.8	67087	227208	0
B7	21	115660	16192.1	65989.8	223936	0
B8	21	130372	17507.8	69553.8	241160	0
B9	21	120004	17492.1	63900.1	232772	1349.08
B10	21	82027.6	13738.2	63709.8	236559	325.067
B11	21	104059	14805.3	63894.9	270264	0
B12	21	82551.1	13997.1	56195.3	249093	66.3309
C1	21	108066	19578.8	53082.3	227745	56.8702
C2	21	174928	25665.5	65410.3	253492	4017.49
C3	21	169164	24976.5	72751.6	259285	308.862
C4	21	116697	18842.6	74425.2	242973	362.755
C5	21	200071	25714.5	70838.4	230316	0
C6	21	98503.5	15936.6	64886.9	208824	0
C7	21	112509	17760	64905.8	205756	0
C8	21	119503	19347.7	73239.1	236579	0
C9	21	114629	18814.2	68264.2	226586	970.816
C10	21	144732	20753.4	67854.6	237614	89.483
C11	21	139763	19917.5	66614.2	263938	483.223
C12	21	154890	22771.8	64544.5	286847	425.347
D1	21	147051	22256.7	55152.5	227070	2881.97
D2	21	136810	20227.4	60650.4	235662	0
D3	21	168653	24037.3	71411.2	250199	1154.34
D4	21	359515	39995.3	70658.2	238221	0
D5	21	133058	18601.2	66460.7	215155	0
D6	21	126846	17055.5	64257.8	208718	0
D7	21	105765	15302.8	58073.2	186805	0
D8	21	119817	17869.9	73091.5	243202	0
D9	21	123395	17620.1	68438	236853	0
D10	21	94335.5	15166.4	64200.3	236013	23.8151
D11	21	93111.6	14134.5	62156.4	252943	0
D12	21	125321	18763.2	71062.2	308434	0
E1	21	130507	26107.9	72988.2	272567	950.693
E2	21	153865	23957.9	72356.6	269273	957.009
E3	21	124087	20543.1	71649.5	252205	0
E4	21	125861	19274.7	71179.6	233851	77.1841
E5	21	121369	19522.1	75580.5	237690	0
E6	21	130699	21278.1	85802.3	270602	0
E7	21	140558	23182.4	90600.1	271187	1084
E8	21	120842	20438.4	77883.5	245541	0
E9	21	125907	21520.1	74574.4	247409	773.115
E10	21	112050	18355.2	66375.7	245586	0
E11	21	123970	18800.9	61750.4	241911	1075.93
E12	21	107280	11276.9	53474.1	278438	0
F1	21	126642	21637.5	66042.3	281033	0
F2	21	124804	21386.7	69820.4	270536	325.498
F3	21	152985	24458.5	73460.3	249494	927.122
F4	21	122031	21503.2	73026.4	241809	2238.87
F5	21	130333	20748.7	75523.1	245945	300.088
F6	21	134947	21174.1	82468.1	270629	0
F7	21	128439	20117.3	81025.5	266087	0
F8	21	138134	21964.6	85863.1	285636	0
F9	21	120789	22690.6	80320.2	271156	0
F10	21	115987	18719.4	70666.7	259712	0
F11	21	94281.8	15341.3	54032.2	215633	0
F12	21	103136	18199	59939	267529	214.938
G1	21	243889	37730.4	65446.5	290131	0
[truncated: 10,679 more rows]

## Sheet: Multicomponent Data
Block Type	96fast
Chemistry	SYBR_GREEN
Experiment File Name	S:\LQW\ZHB\2014-2.eds
Experiment Run End Time	2012-05-24 01:55:27 AM CST
Instrument Type	sds7500fast
Passive Reference	ROX
Well	Cycle	SYBR	ROX
A1	1	100468	289907
A2	1	93194.5	266197
A3	1	88196.9	258455
A4	1	83012	242849
A5	1	94618.9	241785
A6	1	59904.4	236277
A7	1	85059.1	242539
A8	1	87834.1	254273
A9	1	90512.1	280210
A10	1	84258.7	232912
A11	1	90530.1	290167
A12	1	90454.2	296048
B1	1	87394.4	227902
B2	1	99695.6	264183
B3	1	96151.9	287057
B4	1	94796.4	285846
B5	1	100321	287363
B6	1	78945.8	254815
B7	1	81191.5	257683
B8	1	91079	266454
B9	1	83724.2	263203
B10	1	77735.5	265041
B11	1	91666.1	280566
B12	1	80038.6	272126
C1	1	47098.9	250924
C2	1	105957	272587
C3	1	89878.7	283498
C4	1	100580	267411
C5	1	85791.2	250634
C6	1	84778.8	240482
C7	1	85646.3	228876
C8	1	92783.7	256868
C9	1	90356.5	249390
C10	1	96952.8	252056
C11	1	96628.4	267668
C12	1	106351	309278
D1	1	90201.3	245837
D2	1	85010.1	259296
D3	1	103196	275699
D4	1	96850	260951
D5	1	84332.3	236902
D6	1	84568.6	233552
D7	1	71830.1	203596
D8	1	89577.6	268745
D9	1	90139	262464
D10	1	90866.6	260181
D11	1	85697.9	273187
D12	1	114483	317217
E1	1	115896	294175
E2	1	135764	295132
E3	1	106871	278929
E4	1	114458	256745
E5	1	109928	263346
E6	1	123942	299606
E7	1	128146	297381
E8	1	112605	273771
E9	1	109007	248313
E10	1	100530	263804
E11	1	112185	259120
E12	1	88394.5	280279
F1	1	113878	295388
F2	1	113449	289774
F3	1	136713	263596
F4	1	104294	243860
F5	1	117917	263830
F6	1	117782	271560
F7	1	118847	286829
F8	1	128628	307850
F9	1	113139	285877
F10	1	104338	269635
F11	1	91547.6	228775
F12	1	99718.7	274481
G1	1	84849.9	302001
G2	1	185761	277835
G3	1	101018	270758
G4	1	112903	291424
G5	1	117955	286052
G6	1	116681	296265
G7	1	123370	305104
G8	1	128403	311427
G9	1	119596	288746
G10	1	113815	270952
G11	1	119964	309795
G12	1	104123	252564
H1	1	104044	265333
H2	1	108925	297837
H3	1	101311	291742
H4	1	110951	285234
H5	1	116997	280952
H6	1	135749	319848
H7	1	121959	271445
H8	1	146032	305261
H9	1	125762	299562
H10	1	127337	312719
H11	1	150816	350023
H12	1	187478	337455
A1	2	104707	283522
A2	2	93590.8	264525
A3	2	90006.7	255295
A4	2	86571.9	244831
A5	2	96066.6	239445
A6	2	62397.2	233060
A7	2	87775.9	241903
A8	2	91830.1	253719
A9	2	91766.9	278920
A10	2	86225.8	232958
A11	2	92590	286152
A12	2	93125.5	290600
B1	2	90588.9	228645
B2	2	102990	264847
B3	2	98600.3	284803
B4	2	98537.6	283530
B5	2	103700	285394
B6	2	81593	253354
B7	2	83368.6	253444
B8	2	93672.1	266248
B9	2	85739	260384
B10	2	78626.7	261494
B11	2	92358.4	272578
B12	2	82572	265953
C1	2	48385.6	246466
C2	2	108541	270968
C3	2	94294.6	281967
C4	2	102769	265937
C5	2	89135.8	251674
C6	2	86872.1	237469
C7	2	88839.1	226213
C8	2	95482.5	253845
C9	2	94214.1	250741
C10	2	98734.5	238809
C11	2	99639.9	267210
C12	2	109306	305826
D1	2	91778.8	242048
D2	2	87866	258361
D3	2	105028	273819
D4	2	98168.1	258253
D5	2	86767.7	236544
D6	2	86617	232398
D7	2	75080	203469
D8	2	92678.1	268753
D9	2	91435.5	253272
D10	2	92934.2	258002
D11	2	86864.7	272207
D12	2	115262	312250
E1	2	117450	290296
E2	2	138268	291326
E3	2	110970	276086
E4	2	118798	254485
E5	2	113742	262956
E6	2	127384	298271
E7	2	131943	296097
E8	2	115661	272053
E9	2	113645	247368
E10	2	103757	261625
E11	2	114687	256445
E12	2	90237.7	279812
F1	2	116559	292523
F2	2	116849	285055
F3	2	139452	263062
F4	2	107643	243306
F5	2	121574	261950
F6	2	121943	273828
F7	2	121553	284586
F8	2	132059	303460
F9	2	115612	284182
F10	2	107711	264972
F11	2	93209.2	227338
F12	2	99975.9	270933
G1	2	87417.8	293926
G2	2	205270	273934
G3	2	105131	267796
G4	2	116705	289015
G5	2	120796	276432
G6	2	121367	285776
G7	2	126436	298293
G8	2	131063	300429
G9	2	121744	282501
G10	2	116729	270189
G11	2	123424	307357
G12	2	106173	252152
H1	2	107624	261743
H2	2	110142	292816
H3	2	103335	288331
H4	2	113299	285049
H5	2	120338	281523
H6	2	136156	319754
H7	2	122491	265757
H8	2	144445	304279
H9	2	125645	297174
H10	2	125827	309364
H11	2	148032	340998
H12	2	182207	326243
A1	3	106004	278376
A2	3	96085	259657
A3	3	92209.2	252764
A4	3	87978.2	243074
A5	3	98721.7	236686
A6	3	64532.4	230761
A7	3	88845.4	240174
A8	3	91867.1	247535
A9	3	94352.1	276639
A10	3	88397.1	231372
A11	3	94413.6	280108
A12	3	95004.1	285364
B1	3	95630.3	226923
B2	3	104953	262936
B3	3	99355.5	279399
B4	3	98983.9	280196
B5	3	106208	285073
B6	3	82354	249777
B7	3	83727.2	248867
B8	3	97244.6	264698
B9	3	86585.8	257475
B10	3	78712.1	259180
B11	3	93024	270459
B12	3	81997.5	261894
C1	3	48989.8	240464
C2	3	109296	266058
C3	3	97679.5	277671
C4	3	105553	263687
C5	3	90024.2	249955
C6	3	86837.7	234919
C7	3	89986.9	223862
C8	3	97368.6	250377
C9	3	95289.6	247949
C10	3	100736	236752
C11	3	100660	265194
C12	3	110017	299170
D1	3	93035.3	238513
D2	3	88735.1	253917
D3	3	107753	270382
D4	3	100665	255143
D5	3	88856.1	233778
D6	3	87962.3	229632
D7	3	76417.3	201601
D8	3	95030.4	265285
D9	3	92781.7	250513
D10	3	94871.1	255461
D11	3	89949.9	268023
D12	3	117222	309464
E1	3	117906	283795
E2	3	138579	285652
E3	3	111672	271697
E4	3	119224	249948
E5	3	115603	260767
E6	3	127540	294767
E7	3	134161	291750
E8	3	116369	266822
E9	3	114124	248003
E10	3	105636	258056
E11	3	115224	251665
E12	3	92987.2	277381
F1	3	115965	284972
F2	3	116816	278494
F3	3	139925	255182
F4	3	109531	242688
F5	3	121621	260114
F6	3	123243	272796
F7	3	122580	281135
F8	3	131552	297701
F9	3	114305	276904
F10	3	108159	262609
F11	3	92126.9	221004
F12	3	99287.5	268138
G1	3	88494.4	289873
G2	3	220833	267539
G3	3	105685	266853
G4	3	117629	282000
G5	3	122113	273973
G6	3	121726	283090
G7	3	127330	294990
G8	3	130734	296845
G9	3	120886	279161
G10	3	116594	268405
G11	3	124449	305634
G12	3	107016	249734
H1	3	109526	260158
H2	3	109800	291436
H3	3	104089	285101
H4	3	114011	282931
H5	3	120743	279072
H6	3	136533	317246
H7	3	123163	263396
H8	3	143930	300244
H9	3	125933	294040
H10	3	125558	305965
H11	3	147641	337503
H12	3	177882	322567
A1	4	108160	274850
A2	4	97318.9	254699
A3	4	92963.5	247754
A4	4	88286.8	243010
A5	4	99145	233576
A6	4	64221.6	222469
A7	4	89588.4	232149
A8	4	92848.8	242801
A9	4	95350.8	272864
A10	4	91210.4	230878
A11	4	95034.5	275712
A12	4	95553.1	278801
B1	4	98764.1	227394
B2	4	106122	263476
B3	4	100426	274257
B4	4	99932.8	275413
B5	4	107669	280363
B6	4	84541.4	246667
B7	4	83897.2	244183
B8	4	97641.6	260688
B9	4	87889.2	254104
B10	4	79524.9	255154
B11	4	93545.4	269219
B12	4	80203.1	258790
C1	4	50026.4	231557
C2	4	109324	258638
C3	4	100488	274515
C4	4	106588	260068
C5	4	91271.9	247781
C6	4	88976.1	230461
C7	4	91183.1	220455
C8	4	99395.8	246743
C9	4	95407.9	243585
C10	4	102546	237209
C11	4	101562	263839
C12	4	110901	292003
D1	4	93594.8	231615
D2	4	87407.1	247965
D3	4	108128	266004
D4	4	103509	251712
D5	4	89426.3	231362
D6	4	88247.1	224860
D7	4	77402.6	199076
D8	4	95459.1	261208
D9	4	90734.2	241836
D10	4	93886.9	250386
D11	4	88587.7	265658
D12	4	118189	309043
E1	4	116873	275122
E2	4	138735	276208
E3	4	112025	265274
E4	4	119172	241083
E5	4	115964	255971
E6	4	128540	290255
E7	4	134590	288028
E8	4	116593	260506
E9	4	115407	247709
E10	4	104331	251341
E11	4	114694	246059
E12	4	95027.5	276681
F1	4	115077	282356
F2	4	115375	274845
F3	4	139716	253337
F4	4	111152	243350
F5	4	121051	252029
F6	4	125118	272144
F7	4	120892	274524
F8	4	128610	291384
F9	4	114027	275802
F10	4	109451	262520
F11	4	90991.2	218988
F12	4	99406.1	266921
G1	4	89146.3	289120
G2	4	226183	265778
G3	4	106604	266387
G4	4	117945	283493
G5	4	121657	272208
G6	4	122807	281883
G7	4	127389	295238
G8	4	130849	295692
G9	4	120628	277055
G10	4	118639	268141
G11	4	124481	305998
G12	4	107844	249623
H1	4	110148	258933
H2	4	109925	291925
H3	4	104657	284670
H4	4	115509	282594
H5	4	120963	278291
H6	4	136248	316561
H7	4	123858	262627
H8	4	144656	300348
H9	4	126594	293162
H10	4	123835	305574
H11	4	146064	336516
H12	4	178206	320786
A1	5	108044	267375
A2	5	98099	247089
A3	5	93009.4	243351
A4	5	88706.6	243351
A5	5	99534.3	227733
A6	5	65495.7	221220
A7	5	89163.9	230918
A8	5	95023	237065
A9	5	96408.7	268573
A10	5	94588.2	231505
A11	5	94467.5	268736
A12	5	96067.8	272098
B1	5	101783	227256
B2	5	108880	266629
B3	5	100113	266840
B4	5	101386	270971
B5	5	107190	276854
B6	5	84451.6	242358
B7	5	83104	240132
B8	5	96421.5	256925
B9	5	87610.3	248303
B10	5	78383.2	250917
B11	5	94897.4	270208
B12	5	78954.4	255327
C1	5	50582.8	229227
C2	5	108739	250914
C3	5	98770.5	265100
C4	5	106532	255694
C5	5	90713.9	245608
C6	5	88651.3	225746
C7	5	90827.8	214888
C8	5	99295.2	242406
C9	5	94226.1	239931
C10	5	103908	237403
C11	5	102823	263273
C12	5	110549	287946
D1	5	93782.9	231343
D2	5	86796	238395
D3	5	109328	261254
D4	5	104848	248012
D5	5	89920.7	228051
D6	5	88166.2	221485
D7	5	78294.5	198008
D8	5	96166.4	258424
D9	5	89596	239467
D10	5	91746.6	243335
D11	5	86695.4	257174
D12	5	118515	309288
E1	5	117641	274225
E2	5	137764	271642
E3	5	111551	257253
E4	5	117185	238862
E5	5	115669	250454
E6	5	127201	286255
E7	5	131520	277527
E8	5	114440	252596
E9	5	115982	248136
E10	5	103876	248688
E11	5	113676	244507
E12	5	97108.3	276992
F1	5	114916	281868
F2	5	116190	273098
F3	5	139045	252137
F4	5	111633	243251
F5	5	119710	250083
F6	5	125845	272620
F7	5	120750	272969
F8	5	128171	289537
F9	5	112928	274381
F10	5	110236	262666
F11	5	89971	218347
F12	5	99225.7	267291
G1	5	90857	288938
G2	5	234279	264693
G3	5	107534	266696
G4	5	118786	283644
G5	5	120969	270886
G6	5	124736	282060
G7	5	126694	294958
G8	5	132109	295539
G9	5	121702	276722
G10	5	119454	268026
G11	5	125646	304528
G12	5	108173	249453
H1	5	111093	259858
H2	5	112117	291674
H3	5	106184	284233
H4	5	116387	282253
H5	5	122218	278507
H6	5	137623	316381
H7	5	124370	261995
H8	5	144252	300234
H9	5	128044	292958
H10	5	124862	305224
H11	5	146864	338166
H12	5	176034	320832
A1	6	107768	266159
A2	6	98583.8	244047
A3	6	93269.1	235041
A4	6	88913.7	243374
A5	6	101193	227789
A6	6	65842.7	221017
A7	6	89697.6	230337
A8	6	95335.6	237104
A9	6	95628.8	261884
A10	6	95843.2	232166
A11	6	94558.4	266871
A12	6	96231.1	265856
B1	6	103968	227187
B2	6	110810	268147
B3	6	99895.7	260830
B4	6	102529	265449
B5	6	106797	268771
B6	6	84135.3	236998
B7	6	86791.6	237188
B8	6	96786.4	248904
B9	6	87454.9	243444
B10	6	77159	242232
B11	6	97044.3	270260
B12	6	77917.3	244913
C1	6	52524.1	229012
C2	6	109763	250645
C3	6	98315.2	262627
C4	6	104577	249381
C5	6	89279.8	237033
C6	6	90564.5	222681
C7	6	89266.6	211432
C8	6	99362.2	242436
C9	6	93948.4	231155
C10	6	104970	238707
C11	6	104891	264083
C12	6	112003	286701
D1	6	94411.4	230900
D2	6	87697.1	238443
D3	6	108827	253684
D4	6	104975	241664
D5	6	88304.4	219169
D6	6	88166.6	213501
D7	6	77287.6	192957
D8	6	92722.4	249263
D9	6	90766.2	239555
D10	6	88401.9	239916
D11	6	85898.8	255155
D12	6	120084	309989
E1	6	117688	273525
E2	6	138882	271410
E3	6	112319	254737
E4	6	116086	237193
E5	6	114048	244024
E6	6	123920	277545
E7	6	130582	276736
E8	6	114308	251362
E9	6	117688	248145
E10	6	103853	247480
E11	6	114462	243891
E12	6	97286.2	276505
F1	6	114935	281888
F2	6	115683	272373
F3	6	139373	251902
F4	6	112890	243451
F5	6	119831	249419
F6	6	127286	272991
F7	6	120254	271198
F8	6	129788	288979
F9	6	114493	273626
F10	6	110531	262131
F11	6	90327.1	217487
F12	6	100406	268000
G1	6	92310.9	288930
G2	6	245253	264037
G3	6	107636	266677
G4	6	119165	283668
G5	6	120983	269998
G6	6	126144	281965
G7	6	127425	294461
G8	6	133819	295466
G9	6	122287	276509
G10	6	120458	268522
G11	6	126148	304250
G12	6	109486	248973
H1	6	112995	259383
H2	6	112773	292326
H3	6	107250	283617
H4	6	116973	282409
H5	6	123452	278021
H6	6	138244	315967
H7	6	124946	261994
H8	6	144550	300139
H9	6	128401	292835
H10	6	124469	304984
H11	6	147152	338123
H12	6	175549	319860
A1	7	109724	266341
A2	7	99624.3	243044
A3	7	94891.6	233221
A4	7	89269.4	243500
A5	7	100969	227720
A6	7	66454.5	220826
A7	7	89418.8	230266
A8	7	96888.1	236690
A9	7	96237.3	257270
A10	7	97269	231841
A11	7	95169.6	266321
A12	7	95681.7	264587
B1	7	105644	227186
B2	7	112781	267849
B3	7	101125	259101
B4	7	102239	258936
B5	7	106791	266871
B6	7	83643	231954
B7	7	86691.6	229473
B8	7	96750.4	246530
B9	7	86588.5	235666
B10	7	76230.3	239017
B11	7	98915.1	270579
B12	7	76480.2	244965
C1	7	54195.5	229139
C2	7	111988	253632
C3	7	99787.8	261789
C4	7	104739	247225
C5	7	87526.2	234020
C6	7	90587.6	214887
C7	7	88893.7	209213
C8	7	100072	241665
C9	7	93901.4	229383
C10	7	106501	238680
C11	7	106619	264346
C12	7	114533	287626
D1	7	93792.6	230122
D2	7	88913.5	237956
D3	7	110054	251549
D4	7	106206	240229
D5	7	88896.8	217346
D6	7	89253.7	212057
D7	7	77561.1	192012
D8	7	92177.4	247728
D9	7	92558.2	240153
D10	7	88886	238364
D11	7	86196.1	254485
D12	7	120476	309403
E1	7	118972	273344
E2	7	140630	271271
E3	7	114026	254296
E4	7	116411	236527
E5	7	112242	242022
E6	7	123876	275975
E7	7	131590	275424
E8	7	114497	250165
E9	7	117783	248443
E10	7	104537	247021
E11	7	115152	243748
E12	7	98940.4	277478
F1	7	117678	282296
F2	7	116806	271927
F3	7	140093	251965
F4	7	114450	244007
F5	7	120564	249209
F6	7	128439	273740
F7	7	119916	271257
F8	7	130815	290253
F9	7	113703	273741
F10	7	110079	262173
F11	7	90549.9	217107
F12	7	101004	267635
G1	7	93933.9	289393
G2	7	251587	264357
G3	7	107635	265914
G4	7	120028	284134
G5	7	122215	270191
G6	7	128993	282398
G7	7	129381	294946
G8	7	135347	295287
G9	7	123974	277192
G10	7	121194	268865
G11	7	127207	304186
G12	7	111683	248401
H1	7	114001	260266
H2	7	114336	292567
H3	7	108726	284584
H4	7	117654	283123
H5	7	123018	278686
H6	7	138717	316203
H7	7	125496	262535
H8	7	145042	300079
H9	7	128603	293418
H10	7	124554	306100
H11	7	147036	337364
H12	7	177100	320038
A1	8	112066	267034
A2	8	101018	243141
A3	8	95001.7	232933
A4	8	89211.6	242112
A5	8	101102	227940
A6	8	65919.2	220986
A7	8	89504	230411
A8	8	96338.2	238055
A9	8	95262.2	256563
A10	8	99291.3	232940
A11	8	95047.4	265854
A12	8	94734.8	263607
B1	8	107278	228279
B2	8	114439	268420
B3	8	104155	259719
B4	8	103751	257796
B5	8	106013	265928
B6	8	83271.6	230683
B7	8	87514.2	227358
B8	8	96580.2	245659
B9	8	88541.1	234596
B10	8	77740.9	238909
B11	8	100300	270939
B12	8	76049.1	245141
C1	8	55709.5	228997
C2	8	114095	255847
C3	8	101638	261768
C4	8	103388	245992
C5	8	88602	233430
C6	8	90126	213132
C7	8	89029.2	208597
C8	8	99440.2	242112
C9	8	94351.7	229111
C10	8	106960	239513
C11	8	106611	264547
C12	8	116004	287729
D1	8	93349.1	229038
D2	8	90537.4	238080
D3	8	112871	251704
D4	8	106042	239754
D5	8	90547.3	218030
D6	8	90039.7	212539
D7	8	77706.1	192555
D8	8	93297.9	246808
D9	8	93416.4	240046
D10	8	88933.5	237696
D11	8	86301.4	254659
D12	8	121928	310212
E1	8	120199	273549
E2	8	143252	272115
E3	8	114831	254185
E4	8	118103	236712
E5	8	113233	241989
E6	8	123952	276018
E7	8	132391	275796
E8	8	114180	250464
E9	8	119338	249031
E10	8	106151	247840
E11	8	115222	243583
E12	8	99688.7	277262
F1	8	119191	282237
F2	8	117716	271328
F3	8	141898	252546
F4	8	115093	244927
F5	8	121073	249163
F6	8	130224	274126
F7	8	120478	270722
F8	8	132781	290198
F9	8	114431	274158
F10	8	111389	261639
F11	8	90747.4	217344
F12	8	101069	268403
G1	8	95316.1	290025
G2	8	258579	265977
G3	8	108314	265305
G4	8	120531	283413
G5	8	123590	270465
G6	8	129610	282886
G7	8	130556	294986
G8	8	135593	296369
G9	8	125321	276938
G10	8	122069	268708
G11	8	128909	304188
G12	8	111454	249931
H1	8	115437	261177
H2	8	114077	293086
H3	8	109814	285467
H4	8	119240	283501
H5	8	123804	278750
H6	8	139423	316906
H7	8	126546	263292
H8	8	146258	300721
H9	8	128584	294847
H10	8	125112	306047
H11	8	147247	338393
H12	8	177030	320913
A1	9	111693	267669
A2	9	102489	243346
A3	9	96586.6	232535
A4	9	89261.7	242412
A5	9	101360	228039
A6	9	65758	221086
A7	9	89178.8	229455
A8	9	96601.8	238168
A9	9	95280.7	255320
A10	9	100584	232764
A11	9	96793.7	265681
A12	9	93828.3	262691
B1	9	107737	228026
B2	9	116696	268796
B3	9	103932	260078
B4	9	104314	258032
B5	9	106406	265089
B6	9	84546.7	230391
B7	9	88137.1	227750
B8	9	96286.9	245122
B9	9	89432.2	235374
B10	9	78769.1	238881
B11	9	100660	271054
B12	9	73073.5	244073
C1	9	56505.3	228839
C2	9	115466	255109
C3	9	103476	262449
C4	9	104698	246362
C5	9	89972.6	233364
C6	9	91215.2	212414
C7	9	90358.1	208790
C8	9	98480	241076
C9	9	95924.7	229175
C10	9	107833	240619
C11	9	108132	265289
C12	9	118678	288319
D1	9	94902.6	228190
D2	9	91911.6	238056
D3	9	114963	252794
D4	9	107943	240582
D5	9	92288.2	217757
D6	9	91586.6	212182
D7	9	76665.9	191522
D8	9	93361.7	246731
D9	9	94510.9	240116
D10	9	89933.1	238064
D11	9	87861.7	254935
D12	9	122031	309957
E1	9	121659	274518
E2	9	144195	272437
E3	9	116281	255043
E4	9	118903	236611
E5	9	114753	242270
E6	9	123964	276224
E7	9	134022	276127
E8	9	115812	249707
E9	9	119851	250146
E10	9	106794	247673
E11	9	117475	243791
E12	9	100625	277660
F1	9	121009	283006
F2	9	119090	272455
F3	9	143663	252824
F4	9	116365	244693
F5	9	123579	249768
F6	9	129730	274013
F7	9	122144	270598
F8	9	133055	290482
F9	9	116534	274292
F10	9	112093	262015
F11	9	91277.7	216943
F12	9	101654	268637
G1	9	98634.9	291096
G2	9	270788	265602
G3	9	109295	265667
G4	9	122791	284082
G5	9	124833	270630
G6	9	131046	282824
G7	9	132598	294845
G8	9	137271	296320
G9	9	126328	277068
G10	9	122929	269480
G11	9	130473	305002
G12	9	113808	250129
H1	9	114752	260488
H2	9	115086	293468
H3	9	111677	285550
H4	9	119383	283340
H5	9	124945	279474
H6	9	140123	317289
H7	9	126852	263318
H8	9	146721	300810
H9	9	129052	295009
H10	9	125050	305723
H11	9	148339	339276
H12	9	176563	320629
A1	10	116549	267600
A2	10	105398	243957
A3	10	97786.5	232843
A4	10	89799.9	242429
A5	10	100564	227838
A6	10	66302	220853
A7	10	90024.2	229015
A8	10	96731.8	237833
A9	10	95859.8	254780
A10	10	100490	233010
A11	10	98473.7	266263
A12	10	95296.9	261833
B1	10	108531	228549
B2	10	115704	269206
B3	10	105812	259895
B4	10	104919	258873
B5	10	106908	264608
B6	10	85211.9	230547
B7	10	89443.2	227835
B8	10	97745.4	244938
B9	10	90287.5	235734
B10	10	79985.4	238991
B11	10	101099	271521
B12	10	75409.4	243466
C1	10	57233.5	229021
C2	10	116917	256032
C3	10	105273	262732
C4	10	106340	246532
C5	10	91573.2	233466
C6	10	91588.8	212026
C7	10	92456.2	209193
C8	10	98611.4	241384
C9	10	96004	230168
C10	10	107830	240708
C11	10	109323	265256
C12	10	119395	288368
D1	10	94467.6	229134
D2	10	92511	238797
D3	10	116299	252689
D4	10	108583	240242
D5	10	93511.8	218171
D6	10	92412.2	211970
D7	10	77002.1	190861
D8	10	94528.8	246784
D9	10	94868.3	240380
D10	10	90984.5	238412
D11	10	88261.1	255097
D12	10	121978	310432
E1	10	123090	274404
E2	10	145921	272574
E3	10	117151	255332
E4	10	119391	236695
E5	10	115404	242126
E6	10	126259	276963
E7	10	134660	276324
E8	10	117116	250165
E9	10	120971	251076
E10	10	107464	248089
E11	10	118929	244327
E12	10	100770	278533
F1	10	120788	283148
F2	10	118613	272345
F3	10	145270	253321
F4	10	116859	245136
F5	10	124814	250458
F6	10	130316	274809
F7	10	122830	270853
F8	10	134671	290515
F9	10	117041	274828
F10	10	111897	262154
F11	10	91450.9	217763
F12	10	101206	268236
G1	10	99253.2	291311
G2	10	278296	266320
G3	10	110610	266145
G4	10	123178	283948
G5	10	125710	271135
G6	10	131629	283009
G7	10	133693	295964
G8	10	139140	297302
G9	10	127119	278025
G10	10	123574	269385
G11	10	131230	304697
G12	10	111712	250219
H1	10	115993	262091
H2	10	115529	293466
H3	10	112272	286213
H4	10	120042	283825
H5	10	125642	279187
H6	10	140394	317403
H7	10	127579	263440
H8	10	148011	301504
H9	10	129904	294736
H10	10	125970	306200
H11	10	148972	339503
H12	10	177788	320611
A1	11	116243	268380
A2	11	106119	243859
A3	11	99146.1	233334
A4	11	92201.5	242719
A5	11	99992.9	227858
A6	11	65724.7	220160
A7	11	92096.6	229935
A8	11	97658.9	238774
A9	11	96112.2	255220
A10	11	101540	233296
A11	11	101115	266261
A12	11	96113.2	262302
B1	11	107379	228265
B2	11	116005	270122
B3	11	105742	259967
B4	11	107112	258741
B5	11	107889	264752
B6	11	87164.2	230844
B7	11	90514.3	227917
B8	11	99607.5	245148
B9	11	91157.4	235132
B10	11	79848.5	239318
B11	11	101728	272326
B12	11	78475.4	245420
C1	11	59078	229827
C2	11	117537	256283
C3	11	106521	263209
C4	11	106969	246684
C5	11	91813.5	234125
C6	11	91313	211983
C7	11	92868	209577
C8	11	100226	240169
C9	11	97569.5	229912
C10	11	109686	241025
C11	11	110702	264995
C12	11	120332	288814
D1	11	95462.4	229498
D2	11	93478.6	238517
D3	11	118028	253202
D4	11	109757	241051
D5	11	93824.2	218570
D6	11	94035.8	212927
D7	11	77505.5	190327
D8	11	95787.8	246528
D9	11	95739.6	239996
D10	11	91324.2	238462
D11	11	89431	255375
D12	11	122201	310602
E1	11	124138	274930
E2	11	147105	272655
E3	11	118347	254807
E4	11	120602	237181
E5	11	116633	242103
E6	11	126470	277496
E7	11	136973	276801
E8	11	117374	250567
E9	11	121141	250796
E10	11	108727	247500
E11	11	119626	244640
E12	11	101456	278300
F1	11	122353	282491
F2	11	120534	272495
F3	11	145621	252606
F4	11	118039	245191
F5	11	125637	250432
F6	11	131843	275040
F7	11	123374	270792
F8	11	134736	290797
F9	11	118742	274015
F10	11	113716	263201
F11	11	92956.9	217712
F12	11	102025	268719
G1	11	101023	291466
G2	11	282059	266228
G3	11	111194	265561
G4	11	125934	284025
G5	11	126006	270956
G6	11	133363	283212
G7	11	135133	296238
G8	11	140006	296988
G9	11	128722	277696
G10	11	124539	269594
G11	11	132656	306067
G12	11	113674	249882
H1	11	117508	261368
H2	11	116928	294320
H3	11	113138	286750
H4	11	121831	283944
H5	11	126206	279909
H6	11	142782	317984
H7	11	128105	264532
H8	11	148419	301992
H9	11	130486	295400
H10	11	125969	306614
H11	11	149259	339160
H12	11	177422	320832
A1	12	118251	267785
A2	12	107792	244526
A3	12	99751	233452
A4	12	93351.5	242681
A5	12	99807.9	227377
A6	12	66790.2	220304
A7	12	93718	230140
A8	12	99519.6	239285
A9	12	98180.1	255390
A10	12	103093	233774
A11	12	101255	267106
A12	12	97992.2	263167
B1	12	108962	228337
B2	12	118358	269991
B3	12	107944	259905
B4	12	106419	258850
B5	12	109856	265098
B6	12	87376.7	230822
B7	12	90713.1	227779
B8	12	100461	245575
B9	12	92562.5	235335
B10	12	80711.7	239490
B11	12	102390	272669
B12	12	79360.9	245715
C1	12	59992.3	229953
C2	12	119891	255930
C3	12	107096	263067
C4	12	107893	246821
C5	12	93114.9	234616
C6	12	91993.9	212384
C7	12	93770.7	210111
C8	12	100951	240422
C9	12	98552.6	230725
C10	12	109761	241215
C11	12	110801	266248
C12	12	122185	289212
D1	12	97243.4	229361
D2	12	94291.5	238947
D3	12	118571	253385
D4	12	111810	241099
D5	12	94897.4	218275
D6	12	93548.6	212412
D7	12	78247	190451
D8	12	96340.3	247730
D9	12	96685.3	239931
D10	12	92162	238943
D11	12	90593.1	255587
D12	12	122484	310721
E1	12	124705	275349
E2	12	148792	272629
E3	12	119225	255163
E4	12	121285	236944
E5	12	117780	241824
E6	12	127430	277118
E7	12	137838	276659
E8	12	117834	250986
E9	12	121834	251349
E10	12	109349	248598
E11	12	121050	244958
E12	12	103276	279403
F1	12	123392	282834
F2	12	121244	273056
F3	12	147361	253311
F4	12	118424	245278
F5	12	126230	250101
F6	12	132623	275511
F7	12	124419	270817
F8	12	136076	290799
F9	12	118438	274156
F10	12	113160	263138
F11	12	93110.5	217706
F12	12	102727	269312
G1	12	101686	291640
G2	12	290218	266562
G3	12	113423	266560
G4	12	126086	284903
G5	12	127532	271536
G6	12	134752	283171
G7	12	137176	296183
G8	12	141132	297492
G9	12	130256	278147
G10	12	125793	269729
G11	12	134776	305713
G12	12	114457	250058
H1	12	119312	262096
H2	12	118106	294415
H3	12	113975	286372
H4	12	121212	283880
H5	12	127067	280202
H6	12	142830	318086
H7	12	129426	263999
H8	12	148753	301847
H9	12	131461	295101
H10	12	125875	306554
H11	12	150223	339330
H12	12	178013	321285
A1	13	120372	268770
A2	13	108514	244712
A3	13	101654	233372
A4	13	95488.7	243262
A5	13	100269	227305
A6	13	68105.7	220956
A7	13	94416.8	229987
A8	13	101316	239620
A9	13	99064.3	255732
A10	13	103143	234156
A11	13	103358	267247
A12	13	99784	263870
B1	13	109272	229429
B2	13	119244	269978
B3	13	108547	260252
B4	13	107645	259235
B5	13	109734	264771
B6	13	88048.1	231346
B7	13	91212.6	227995
B8	13	102144	246199
B9	13	92734.9	236212
B10	13	80743	239338
B11	13	102712	272925
B12	13	79947.8	246716
C1	13	60249.8	229677
C2	13	119465	256298
C3	13	108264	263259
C4	13	108653	247210
C5	13	92742.1	235219
C6	13	93548.1	212509
C7	13	94807.5	210093
C8	13	101999	240861
C9	13	99038.9	230385
C10	13	110395	241521
C11	13	111831	266406
C12	13	122797	288525
D1	13	98277.3	229449
D2	13	94772	239046
D3	13	119731	253340
D4	13	112570	241850
D5	13	95698.8	218736
D6	13	95159.4	212665
D7	13	79037.7	190431
D8	13	96819.4	248168
D9	13	96386.6	239911
D10	13	93078.1	239422
D11	13	89590.9	255338
D12	13	123629	311413
E1	13	126582	275360
E2	13	149476	273925
E3	13	119459	255487
E4	13	121487	237331
E5	13	117973	242240
E6	13	128242	277429
E7	13	139319	276697
E8	13	118823	250830
E9	13	122451	251434
E10	13	110416	248355
E11	13	121337	245056
E12	13	103735	278855
F1	13	124307	283157
F2	13	123089	272981
F3	13	148590	253176
F4	13	119946	245418
F5	13	127205	250758
F6	13	133259	275982
F7	13	124390	271225
F8	13	135786	291107
F9	13	119357	274913
F10	13	114682	263338
F11	13	93401.6	217702
F12	13	102272	269438
G1	13	102941	291768
G2	13	298718	266709
G3	13	114660	266275
G4	13	127162	284639
G5	13	127813	271412
G6	13	135170	283232
G7	13	139216	297423
G8	13	141863	297958
G9	13	129664	278693
G10	13	127118	269968
G11	13	136944	306500
G12	13	116282	250877
H1	13	122029	261227
H2	13	120298	294578
H3	13	116981	286900
H4	13	123201	284164
H5	13	128696	280184
H6	13	143579	318384
H7	13	128894	263962
H8	13	149906	301632
H9	13	133735	294956
H10	13	127629	306996
H11	13	149107	339411
H12	13	179762	320580
A1	14	121813	268920
A2	14	110536	244791
A3	14	102678	233240
A4	14	95484.4	242990
A5	14	101346	227801
A6	14	69217	220891
A7	14	95087	230678
A8	14	102435	239137
A9	14	100104	255544
A10	14	103643	233799
A11	14	103898	267505
A12	14	101708	263336
B1	14	110764	228824
B2	14	119915	271002
B3	14	108426	260827
B4	14	108723	259613
B5	14	110973	264755
B6	14	89676.6	231171
B7	14	92513.3	228584
B8	14	102241	246139
B9	14	93942.2	235782
B10	14	81421.2	239543
B11	14	103525	273290
B12	14	81105.9	247537
C1	14	61388.9	230212
C2	14	121522	256152
C3	14	109448	263523
C4	14	109272	247210
C5	14	94809.5	235174
C6	14	93371	213072
C7	14	95526.6	209760
C8	14	102581	240995
C9	14	100057	231153
C10	14	110473	241113
C11	14	112659	266521
C12	14	123727	289100
D1	14	98732.6	230422
D2	14	95629.5	239539
D3	14	120261	253092
D4	14	114575	241069
D5	14	96532.6	219105
D6	14	95409.5	212944
D7	14	80037.1	190563
D8	14	98562.8	248506
D9	14	96952.2	240270
D10	14	93245.6	238794
D11	14	89815.4	255722
D12	14	123591	311444
E1	14	127384	275378
E2	14	150226	273674
E3	14	120846	255812
E4	14	123015	238210
E5	14	118347	242205
E6	14	128466	277992
E7	14	138343	276870
E8	14	118962	250750
E9	14	123595	251537
E10	14	110114	248652
E11	14	120690	245436
E12	14	104344	279466
F1	14	124553	284075
F2	14	122585	273415
F3	14	149315	253591
F4	14	120478	246200
F5	14	126809	250809
F6	14	133827	276050
F7	14	124814	271231
F8	14	136171	291171
F9	14	119421	275364
F10	14	113677	264094
F11	14	93395.7	217416
F12	14	103533	269362
G1	14	104906	292668
G2	14	300784	266803
G3	14	116163	266802
G4	14	127404	285247
G5	14	128999	271239
G6	14	136096	283077
G7	14	139989	297491
G8	14	142973	298244
G9	14	131473	279111
G10	14	130321	270465
G11	14	139179	306325
G12	14	118101	250899
H1	14	124571	261570
H2	14	123843	294898
H3	14	120382	287268
H4	14	124712	284813
H5	14	130329	281125
H6	14	145476	319297
H7	14	130778	264738
H8	14	151288	302486
H9	14	133716	295520
H10	14	127413	307641
H11	14	150272	340511
H12	14	180398	321569
A1	15	122105	269167
A2	15	111253	244724
A3	15	102912	234066
A4	15	96551.6	243389
A5	15	102730	228045
A6	15	69524.4	221300
A7	15	95850.5	230828
A8	15	103920	239373
A9	15	100353	256398
A10	15	104379	234559
A11	15	105789	267358
A12	15	102014	264054
B1	15	111278	228691
B2	15	120221	270253
B3	15	109580	260834
B4	15	108942	259709
B5	15	111914	265806
B6	15	90397	231575
B7	15	92125.3	227989
B8	15	102499	245464
B9	15	94849.2	236307
B10	15	81984.4	239785
B11	15	103889	272792
B12	15	81723.8	247928
C1	15	61739	230549
C2	15	122326	256875
C3	15	110692	263872
C4	15	110206	247498
C5	15	95142.3	235118
C6	15	93302.6	213164
C7	15	96243.6	209855
C8	15	103960	240709
C9	15	99452.7	230004
C10	15	111438	240850
C11	15	112447	266456
C12	15	124594	288989
D1	15	99982.2	229721
D2	15	96698.8	239250
D3	15	122290	254089
D4	15	118076	241764
D5	15	97743.8	218933
D6	15	96247.2	213423
D7	15	80801.7	190902
D8	15	98455.5	247981
D9	15	98344.1	240783
D10	15	93940.6	239685
D11	15	90882.8	255740
D12	15	123835	310869
E1	15	127770	275975
E2	15	151324	273429
E3	15	120565	255285
E4	15	123448	238190
E5	15	119481	242931
E6	15	129272	277982
E7	15	138637	277028
E8	15	119040	250998
E9	15	123703	251685
E10	15	110862	249051
E11	15	122270	245102
E12	15	104711	279887
F1	15	125523	283953
F2	15	124272	273585
F3	15	149663	253831
F4	15	120764	245904
F5	15	128155	250651
F6	15	134181	276393
F7	15	126418	272198
F8	15	136811	290442
F9	15	120213	275714
F10	15	114222	263625
F11	15	93871.7	217334
F12	15	103854	269395
G1	15	108018	292657
G2	15	306859	267314
G3	15	118830	267128
G4	15	128556	285013
G5	15	129940	271906
G6	15	135687	283773
G7	15	142080	297965
G8	15	145593	297928
G9	15	133837	279213
G10	15	135377	270372
G11	15	144537	306445
G12	15	122035	250739
H1	15	129756	262321
H2	15	130922	294597
H3	15	126781	287309
H4	15	128789	285544
H5	15	133486	280772
H6	15	149891	318689
H7	15	131883	264060
H8	15	153418	302642
H9	15	136440	295396
H10	15	128086	307419
H11	15	149843	340622
H12	15	180942	321902
A1	16	121830	269507
A2	16	111788	245581
A3	16	104747	233786
A4	16	98258.6	243753
A5	16	104022	227707
A6	16	70390	221401
A7	16	97216.4	231070
A8	16	104552	238673
A9	16	100326	256736
A10	16	105769	234663
A11	16	105776	268014
A12	16	104299	263976
B1	16	112150	228827
B2	16	120555	271228
B3	16	110744	261175
B4	16	109316	259117
B5	16	112596	265112
B6	16	90160.5	231168
B7	16	93182.5	228139
B8	16	104078	245719
B9	16	95024.5	236393
B10	16	81904	240243
B11	16	103393	273452
B12	16	82069.5	248313
C1	16	64163.6	230302
C2	16	123083	256515
C3	16	112183	264280
C4	16	110861	247372
C5	16	98230	234926
C6	16	94259.7	212813
C7	16	95910.3	209820
C8	16	104447	241272
C9	16	100865	230973
C10	16	112759	241478
C11	16	113585	267298
C12	16	124615	289711
D1	16	101756	230157
D2	16	97634.8	239358
D3	16	123758	254103
D4	16	122960	242052
D5	16	98791.7	218911
D6	16	97380.3	212868
D7	16	81204.8	190677
D8	16	99448.1	248021
D9	16	98782.3	241279
D10	16	93862.5	239609
D11	16	91324.7	255424
D12	16	124481	311429
E1	16	128768	275988
E2	16	151176	273594
E3	16	122038	255407
E4	16	123077	237794
E5	16	119188	242167
E6	16	129455	277274
E7	16	139170	277511
E8	16	119972	250924
E9	16	123654	251643
E10	16	111127	248895
E11	16	122746	245723
E12	16	105013	279762
F1	16	125862	283669
F2	16	124485	274289
F3	16	150784	253586
F4	16	121066	246189
F5	16	129175	250518
F6	16	134911	275498
F7	16	126350	270898
F8	16	137680	291388
F9	16	120825	275817
F10	16	114785	263441
F11	16	94304.6	217953
F12	16	103718	269733
G1	16	110660	292060
G2	16	318818	267250
G3	16	121999	266965
G4	16	130006	285068
G5	16	130925	271313
G6	16	137741	283230
G7	16	145444	297942
G8	16	147510	298374
G9	16	135800	278746
G10	16	144749	270631
G11	16	151852	306200
G12	16	127856	251547
H1	16	141416	262294
H2	16	142332	295192
H3	16	138966	287166
H4	16	133531	285270
H5	16	139018	281001
H6	16	155214	318982
H7	16	135004	264072
H8	16	156649	302791
H9	16	139838	295490
H10	16	128339	307339
H11	16	150425	340470
H12	16	180138	322265
A1	17	123341	269859
A2	17	113333	245294
A3	17	106136	233861
A4	17	97489.1	244072
A5	17	105446	228331
A6	17	71110.2	221269
A7	17	98205.9	231357
A8	17	105717	239944
A9	17	102987	256732
A10	17	106876	234573
A11	17	107758	268110
A12	17	104942	263669
B1	17	112757	228922
B2	17	122510	270724
B3	17	111886	260807
B4	17	111396	259562
B5	17	114700	265864
B6	17	93023.7	231440
B7	17	94549.8	228312
B8	17	105463	246143
B9	17	96084.7	236421
B10	17	81476	239628
B11	17	104549	273551
B12	17	82020.3	249395
C1	17	65433	230609
C2	17	126481	257748
C3	17	114576	263981
C4	17	111139	247796
C5	17	102941	235476
C6	17	94565.9	213626
C7	17	97324.8	210109
C8	17	106212	241914
C9	17	101887	231480
C10	17	113921	241995
C11	17	115457	267024
C12	17	126580	288639
D1	17	103650	229627
D2	17	99647.4	239647
D3	17	125635	253441
D4	17	135219	242449
D5	17	100365	219165
D6	17	98329.9	212839
D7	17	83124.3	190885
D8	17	100880	248055
D9	17	100680	240607
D10	17	94040.9	239289
D11	17	90690.9	256218
D12	17	124313	312040
E1	17	129455	276587
E2	17	153105	273684
E3	17	122581	256060
E4	17	123712	238024
E5	17	119661	242976
E6	17	129143	277554
E7	17	140611	277163
E8	17	120552	251341
E9	17	124799	252160
E10	17	111867	249456
E11	17	123208	245435
E12	17	105795	280535
F1	17	125490	283739
F2	17	124632	274205
F3	17	151259	254050
F4	17	121344	246027
F5	17	129445	250366
F6	17	135118	276072
F7	17	126880	271415
F8	17	137891	292451
F9	17	120949	276033
F10	17	114866	263481
F11	17	94709.4	218054
F12	17	104296	270783
G1	17	116765	292563
G2	17	323298	267436
G3	17	127529	267605
G4	17	131504	285212
G5	17	132356	271260
G6	17	139931	283774
G7	17	150508	298171
G8	17	152751	298517
G9	17	139534	279258
G10	17	161901	271027
G11	17	167208	306281
G12	17	140975	251230
H1	17	162787	262293
H2	17	165352	295173
H3	17	160448	287911
H4	17	144145	285337
H5	17	149010	281523
H6	17	166993	319487
H7	17	139800	264766
H8	17	162603	302631
H9	17	146356	295877
H10	17	130039	307916
H11	17	153209	340937
H12	17	182437	322240
A1	18	125071	270072
A2	18	114524	246052
A3	18	107631	235229
A4	18	98752.1	243936
A5	18	106180	228128
A6	18	71603.6	221781
A7	18	98603.1	231552
A8	18	106385	239936
A9	18	102011	256806
A10	18	110241	234925
A11	18	108767	267549
A12	18	106267	265154
B1	18	114383	228502
B2	18	124529	271730
B3	18	114391	261006
B4	18	113542	259320
B5	18	116390	265440
B6	18	94258.9	232399
B7	18	96451	228544
B8	18	107362	245489
B9	18	98431.7	236206
B10	18	81491.7	240060
B11	18	105084	273165
B12	18	82325.7	249915
C1	18	69061.9	230662
C2	18	129328	256645
C3	18	118446	264259
C4	18	111959	247965
C5	18	110590	235218
C6	18	95252.1	213387
C7	18	98396.5	210297
C8	18	107474	241984
C9	18	102772	231087
C10	18	117081	241423
C11	18	117597	267624
C12	18	129177	289219
D1	18	106939	230468
D2	18	101135	239212
D3	18	128804	253888
D4	18	156074	242671
D5	18	102588	219303
D6	18	101482	213149
D7	18	84558.6	190635
D8	18	102577	248408
D9	18	101924	241317
D10	18	93476.1	239889
D11	18	91876.2	256237
D12	18	125218	311805
E1	18	129255	276918
E2	18	152028	274530
E3	18	123267	255721
E4	18	124296	238325
E5	18	120439	243120
E6	18	130287	277679
E7	18	140728	277590
E8	18	121332	251502
E9	18	125500	252242
E10	18	112070	248931
E11	18	123582	245407
E12	18	106345	280065
F1	18	125519	284382
F2	18	124639	274302
F3	18	152844	254281
F4	18	121346	246987
F5	18	129706	251068
F6	18	135545	276027
F7	18	127004	271641
F8	18	137826	291511
F9	18	121292	275847
F10	18	115145	264317
F11	18	94773.9	218221
F12	18	104595	270122
G1	18	125882	292945
G2	18	332857	267212
G3	18	138034	267754
G4	18	134193	285162
G5	18	134972	271560
G6	18	142356	283874
G7	18	158912	297848
G8	18	161436	298224
G9	18	147092	279421
G10	18	193819	270272
G11	18	196604	306753
G12	18	164421	251089
H1	18	197819	262965
H2	18	205998	295655
H3	18	198820	288115
H4	18	163961	285726
H5	18	169031	281420
H6	18	188242	319241
H7	18	149809	264905
H8	18	174255	303992
H9	18	156480	296116
H10	18	131454	308122
H11	18	156479	341327
H12	18	184109	322828
A1	19	128311	269636
A2	19	116700	245907
A3	19	109157	234784
A4	19	98956.2	243481
A5	19	106867	228023
A6	19	72988.1	221864
A7	19	99854.5	231443
A8	19	106896	239943
A9	19	103214	256931
A10	19	111324	234839
A11	19	110438	267891
A12	19	108505	263717
B1	19	118058	228747
B2	19	128644	270949
B3	19	117993	261165
B4	19	117796	260247
B5	19	121992	265787
B6	19	98615.4	232087
B7	19	99390.7	229003
B8	19	110764	246033
B9	19	102184	236499
B10	19	82102.6	240010
B11	19	103697	273192
B12	19	82768.7	250610
C1	19	74738.8	230745
C2	19	137083	257043
C3	19	126854	265302
C4	19	112850	248462
C5	19	126024	235618
C6	19	95770.8	213744
C7	19	101171	210790
C8	19	109354	241657
C9	19	105230	231232
C10	19	120882	241875
C11	19	121259	267641
C12	19	133547	289825
D1	19	114008	230091
D2	19	107340	239698
D3	19	136393	254445
D4	19	194697	242599
D5	19	107301	219011
D6	19	105652	213275
D7	19	88537.1	190743
D8	19	105626	248300
D9	19	105160	240818
D10	19	94837.1	240084
D11	19	91174.6	256467
D12	19	124943	311649
E1	19	130367	276342
E2	19	153831	273236
E3	19	124326	256300
E4	19	124598	238247
E5	19	120988	242743
E6	19	130814	276929
E7	19	140686	276949
E8	19	121508	251544
E9	19	124797	252241
E10	19	112628	249436
E11	19	124021	245358
E12	19	106710	280307
F1	19	126928	283935
F2	19	125576	274227
F3	19	153126	254344
F4	19	121590	246998
F5	19	130898	251039
F6	19	135917	275865
F7	19	128143	271536
F8	19	137407	290892
F9	19	121469	275796
F10	19	115468	264472
F11	19	94569.6	218188
F12	19	103887	270348
G1	19	146617	293607
G2	19	352579	266650
G3	19	157247	267607
G4	19	139368	285693
G5	19	139927	272704
G6	19	146020	283452
G7	19	175480	298542
G8	19	178295	298639
G9	19	161493	279053
G10	19	251680	271150
G11	19	249158	306863
G12	19	207428	251598
H1	19	263040	262302
H2	19	277851	296223
H3	19	268043	288204
H4	19	202263	285221
H5	19	206028	281079
H6	19	228467	319203
H7	19	167842	264557
H8	19	197005	302765
H9	19	179434	296438
H10	19	134549	307620
H11	19	161032	341149
H12	19	188442	323268
A1	20	132194	270517
A2	20	121945	245678
A3	20	114043	234984
A4	20	100267	244501
A5	20	108353	228187
A6	20	74119.4	222280
A7	20	100592	231935
A8	20	107786	240478
A9	20	105207	256689
A10	20	116238	235078
A11	20	116659	267969
A12	20	114107	263985
B1	20	121864	228914
B2	20	136924	271646
B3	20	126529	261820
B4	20	124587	260592
B5	20	130743	265611
B6	20	107064	231853
B7	20	104759	228994
B8	20	118668	246010
B9	20	108662	236962
B10	20	81852.4	239985
B11	20	104131	273418
B12	20	82502.4	251409
C1	20	86769.4	230840
C2	20	150718	257751
C3	20	141636	264663
C4	20	114847	248729
C5	20	153056	236178
C6	20	97103.2	213714
C7	20	105265	210887
C8	20	113321	242212
C9	20	109030	231628
C10	20	129332	242015
C11	20	127437	267860
C12	20	141166	289154
D1	20	126177	230740
D2	20	117448	240054
D3	20	146915	254556
D4	20	262123	242713
D5	20	116849	219232
D6	20	112806	213983
D7	20	94325	190717
D8	20	111046	248666
D9	20	112162	241368
D10	20	94563.5	240552
D11	20	92247.5	256545
D12	20	125426	312088
E1	20	130798	276284
E2	20	154174	274387
E3	20	124440	256509
E4	20	126019	238707
E5	20	121664	243082
E6	20	131060	277841
E7	20	141438	277521
E8	20	122011	251780
E9	20	125075	252335
E10	20	112336	249789
E11	20	124172	245563
E12	20	107030	280080
F1	20	127361	284511
F2	20	125171	274724
F3	20	153443	254787
F4	20	122736	247272
F5	20	130399	250944
F6	20	136525	275769
F7	20	127459	271379
F8	20	138886	291663
F9	20	121991	276113
F10	20	115065	264794
F11	20	94448.4	218595
F12	20	104297	270336
G1	20	182225	293408
G2	20	381875	266653
G3	20	191582	267613
G4	20	148288	285800
G5	20	149259	272661
G6	20	155420	284103
G7	20	205411	298842
G8	20	209755	298678
G9	20	188867	279272
G10	20	344708	271503
G11	20	340043	307045
G12	20	278207	250974
H1	20	359142	263054
H2	20	388034	295480
H3	20	373673	288308
H4	20	267363	285531
H5	20	271589	281736
H6	20	301365	319742
H7	20	202210	264555
H8	20	239258	303461
H9	20	219784	296192
H10	20	141480	308219
H11	20	168894	341306
H12	20	195810	322954
A1	21	137328	270670
A2	21	130979	245921
A3	21	121959	235089
A4	21	102442	245074
A5	21	109213	228238
A6	21	75768.9	222113
A7	21	104089	231925
A8	21	109789	240448
A9	21	106850	257052
A10	21	124557	235012
A11	21	123667	267908
A12	21	122472	265096
B1	21	132465	229562
B2	21	152350	271435
B3	21	141866	261571
B4	21	138831	260909
B5	21	146038	266226
B6	21	121779	232004
B7	21	116173	228647
B8	21	130654	245993
B9	21	120573	237035
B10	21	82572.2	240711
B11	21	104424	273974
B12	21	83040.2	252195
C1	21	108823	230780
C2	21	175588	257617
C3	21	169986	264235
C4	21	117445	248455
C5	21	200833	235581
C6	21	99096.2	213709
C7	21	112951	210686
C8	21	120276	242037
C9	21	115392	231528
C10	21	145410	242269
C11	21	140353	268027
C12	21	155499	290415
D1	21	147743	230354
D2	21	137476	239497
D3	21	169451	255163
D4	21	360407	243308
D5	21	133599	220131
D6	21	127405	213529
D7	21	106308	191179
D8	21	120474	248541
D9	21	124005	241669
D10	21	94933.2	240278
D11	21	93604.9	256694
D12	21	125883	312439
E1	21	131800	277277
E2	21	154737	274018
E3	21	124922	257161
E4	21	126516	239093
E5	21	122142	243482
E6	21	131461	277180
E7	21	141494	278381
E8	21	121687	251478
E9	21	126812	252838
E10	21	112790	249974
E11	21	124632	245756
E12	21	107257	280943
F1	21	127484	284854
F2	21	125687	274951
F3	21	153943	254701
F4	21	122961	247145
F5	21	131147	251557
F6	21	135763	276737
F7	21	128999	272084
F8	21	138992	291893
F9	21	121825	276910
F10	21	116729	264396
F11	21	94877.1	218932
F12	21	103887	270833
G1	21	245023	293745
[truncated: 10,679 more rows]

## Sheet: Amplification Data
Block Type	96fast
Chemistry	SYBR_GREEN
Experiment File Name	S:\LQW\ZHB\2014-2.eds
Experiment Run End Time	2012-05-24 01:55:27 AM CST
Instrument Type	sds7500fast
Passive Reference	ROX
Well	Cycle	Target Name	Rn	ΔRn
A1	1	0849	0.346552	-0.0325504
A1	2	0849	0.369308	-0.0151242
A1	3	0849	0.380794	-0.00896758
A1	4	0849	0.393523	-0.00156904
A1	5	0849	0.404093	0.00367137
A1	6	0849	0.404902	-0.000849472
A1	7	0849	0.411969	0.00088764
A1	8	0849	0.419671	0.00325975
A1	9	0849	0.417282	-0.00445947
A1	10	0849	0.435536	0.00846489
A1	11	0849	0.433128	0.000727491
A1	12	0849	0.441587	0.00385625
A1	13	0849	0.447863	0.00480271
A1	14	0849	0.452971	0.00458103
A1	15	0849	0.453641	-7.93385e-05
A1	16	0849	0.452047	-0.00700272
A1	17	0849	0.457057	-0.00732352
A1	18	0849	0.463105	-0.00660535
A1	19	0849	0.475869	0.000828926
A1	20	0849	0.488672	0.00830251
A1	21	0849	0.507363	0.0216636
A1	22	0849	0.558786	0.0677562
A1	23	0849	0.653611	0.157252
A1	24	0849	0.829882	0.328193
A1	25	0849	1.11391	0.606891
A1	26	0849	1.53097	1.01862
A1	27	0849	1.99047	1.47279
A1	28	0849	2.33262	1.80961
A1	29	0849	2.59579	2.06745
A1	30	0849	2.7763	2.24263
A1	31	0849	2.92801	2.38902
A1	32	0849	3.05173	2.5074
A1	33	0849	3.13939	2.58973
A1	34	0849	3.19416	2.63917
A1	35	0849	3.23841	2.67809
A1	36	0849	3.28359	2.71795
A1	37	0849	3.31967	2.74869
A1	38	0849	3.34098	2.76467
A1	39	0849	3.36837	2.78673
A1	40	0849	3.39138	2.80442
A2	1	0849	0.350096	-0.0206873
A2	2	0849	0.353807	-0.0229465
A2	3	0849	0.370046	-0.0126773
A2	4	0849	0.382094	-0.00659885
A2	5	0849	0.397019	0.00235619
A2	6	0849	0.403955	0.00332258
A2	7	0849	0.409902	0.00330023
A2	8	0849	0.415472	0.00290007
A2	9	0849	0.421168	0.00262598
A2	10	0849	0.432034	0.00752271
A2	11	0849	0.435166	0.00468466
A2	12	0849	0.44082	0.00436944
A2	13	0849	0.443433	0.00101206
A2	14	0849	0.451551	0.0031606
A2	15	0849	0.454608	0.000247686
A2	16	0849	0.455199	-0.00513083
A2	17	0849	0.46203	-0.00427026
A2	18	0849	0.465445	-0.00682498
A2	19	0849	0.47457	-0.00366992
A2	20	0849	0.496362	0.0121528
A2	21	0849	0.532605	0.0424262
A2	22	0849	0.593925	0.0977763
A2	23	0849	0.712117	0.209998
A2	24	0849	0.92266	0.414572
A2	25	0849	1.2512	0.737142
A2	26	0849	1.69664	1.17661
A2	27	0849	2.09547	1.56947
A2	28	0849	2.3921	1.86013
A2	29	0849	2.59937	2.06143
A2	30	0849	2.76623	2.22232
A2	31	0849	2.89239	2.34252
A2	32	0849	2.98123	2.42539
A2	33	0849	3.05994	2.49812
A2	34	0849	3.11168	2.5439
A2	35	0849	3.15044	2.57668
A2	36	0849	3.1935	2.61378
A2	37	0849	3.21305	2.62735
A2	38	0849	3.23243	2.64076
A2	39	0849	3.2463	2.64866
A2	40	0849	3.27791	2.67431
A3	1	0849	0.341247	-0.022278
A3	2	0849	0.35256	-0.0167539
A3	3	0849	0.364804	-0.0102974
A3	4	0849	0.375226	-0.00566473
A3	5	0849	0.382202	-0.00447629
A3	6	0849	0.396821	0.00435359
A3	7	0849	0.406874	0.0086184
A3	8	0849	0.40785	0.0038065
A3	9	0849	0.415363	0.00553088
A3	10	0849	0.419968	0.0043472
A3	11	0849	0.424912	0.00350247
A3	12	0849	0.427287	8.9642e-05
A3	13	0849	0.43559	0.00260384
A3	14	0849	0.440225	0.00145065
A3	15	0849	0.439671	-0.00489118
A3	16	0849	0.448046	-0.00230546
A3	17	0849	0.45384	-0.00229954
A3	18	0849	0.457559	-0.00436858
A3	19	0849	0.464924	-0.00279229
A3	20	0849	0.485323	0.011818
A3	21	0849	0.518779	0.0394862
A3	22	0849	0.58365	0.0985688
A3	23	0849	0.704915	0.214045
A3	24	0849	0.920789	0.42413
A3	25	0849	1.27568	0.773238
A3	26	0849	1.77811	1.26988
A3	27	0849	2.27779	1.76377
A3	28	0849	2.64294	2.12313
A3	29	0849	2.91667	2.39107
A3	30	0849	3.1106	2.57921
A3	31	0849	3.28299	2.74581
A3	32	0849	3.39259	2.84963
A3	33	0849	3.48401	2.93526
A3	34	0849	3.54703	2.99249
A3	35	0849	3.60361	3.04328
A3	36	0849	3.65192	3.0858
A3	37	0849	3.68665	3.11474
A3	38	0849	3.71517	3.13748
A3	39	0849	3.7357	3.15221
A3	40	0849	3.76607	3.1768
A4	1	0849	0.341826	-0.00750555
A4	2	0849	0.353598	0.00101232
A4	3	0849	0.36194	0.00609995
A4	4	0849	0.363306	0.00421159
A4	5	0849	0.364521	0.0021722
A4	6	0849	0.365337	-0.000265374
A4	7	0849	0.36661	-0.00224722
A4	8	0849	0.368473	-0.00363805
A4	9	0849	0.368224	-0.00714154
A4	10	0849	0.370417	-0.00820287
A4	11	0849	0.37987	-0.00200386
A4	12	0849	0.384668	-0.000460115
A4	13	0849	0.392534	0.00415178
A4	14	0849	0.392955	0.0013192
A4	15	0849	0.396697	0.00180675
A4	16	0849	0.403107	0.00496211
A4	17	0849	0.399427	-0.00197186
A4	18	0849	0.404828	0.000174632
A4	19	0849	0.406423	-0.00148379
A4	20	0849	0.410087	-0.00107403
A4	21	0849	0.418006	0.00359049
A4	22	0849	0.4249	0.00723062
A4	23	0849	0.453242	0.0323179
A4	24	0849	0.491437	0.0672592
A4	25	0849	0.560203	0.132771
A4	26	0849	0.700723	0.270036
A4	27	0849	0.949989	0.516048
A4	28	0849	1.34934	0.912146
A4	29	0849	1.86914	1.42869
A4	30	0849	2.32574	1.88203
A4	31	0849	2.6593	2.21234
A4	32	0849	2.88329	2.43307
A4	33	0849	3.09532	2.64186
A4	34	0849	3.22439	2.76767
A4	35	0849	3.33203	2.87205
A4	36	0849	3.40442	2.94119
A4	37	0849	3.46578	2.9993
A4	38	0849	3.52274	3.05301
A4	39	0849	3.56527	3.09228
A4	40	0849	3.592	3.11576
A5	1	0849	0.391335	-0.0294316
A5	2	0849	0.401205	-0.0220154
A5	3	0849	0.417099	-0.00857509
A5	4	0849	0.424466	-0.00366186
A5	5	0849	0.437065	0.00648365
A5	6	0849	0.44424	0.0112052
A5	7	0849	0.44339	0.00790127
A5	8	0849	0.443546	0.00560383
A5	9	0849	0.444486	0.00408956
A5	10	0849	0.441383	-0.00146652
A5	11	0849	0.438839	-0.0064645
A5	12	0849	0.438953	-0.00880354
A5	13	0849	0.441122	-0.00908891
A5	14	0849	0.444889	-0.00777553
A5	15	0849	0.450479	-0.0046389
A5	16	0849	0.456826	-0.000745538
A5	17	0849	0.461812	0.00178673
A5	18	0849	0.465441	0.002962
A5	19	0849	0.468666	0.00373337
A5	20	0849	0.474841	0.0074548
A5	21	0849	0.478505	0.00866548
A5	22	0849	0.489765	0.0174716
A5	23	0849	0.514865	0.040118
A5	24	0849	0.557211	0.08001
A5	25	0849	0.639945	0.160291
A5	26	0849	0.789754	0.307646
A5	27	0849	1.06563	0.581065
A5	28	0849	1.48468	0.997665
A5	29	0849	2.01722	1.52775
A5	30	0849	2.47199	1.98007
A5	31	0849	2.79615	2.30177
A5	32	0849	3.0219	2.52507
A5	33	0849	3.22656	2.72727
A5	34	0849	3.35055	2.84881
A5	35	0849	3.45332	2.94913
A5	36	0849	3.53458	3.02793
A5	37	0849	3.58577	3.07667
A5	38	0849	3.6269	3.11535
A5	39	0849	3.67009	3.15609
A5	40	0849	3.69269	3.17623
A6	1	0849	0.253535	-0.0261331
A6	2	0849	0.267731	-0.014515
A6	3	0849	0.279651	-0.00517232
A6	4	0849	0.288677	0.00127573
A6	5	0849	0.296066	0.00608732
A6	6	0849	0.297908	0.00535143
A6	7	0849	0.300936	0.00580139
A6	8	0849	0.298296	0.000584191
A6	9	0849	0.297432	-0.00285759
A6	10	0849	0.300208	-0.00265929
A6	11	0849	0.298531	-0.00691435
A6	12	0849	0.303173	-0.00485042
A6	13	0849	0.308232	-0.00236905
A6	14	0849	0.313354	0.000174962
A6	15	0849	0.314164	-0.00159241
A6	16	0849	0.31793	-0.000404459
A6	17	0849	0.321374	0.000462607
A6	18	0849	0.322857	-0.000632869
A6	19	0849	0.328977	0.00290988
A6	20	0849	0.33345	0.00480525
A6	21	0849	0.341127	0.00990445
A6	22	0849	0.354306	0.0205055
A6	23	0849	0.383407	0.0470291
A6	24	0849	0.432111	0.0931545
A6	25	0849	0.518431	0.176897
A6	26	0849	0.685132	0.34102
A6	27	0849	0.978078	0.631389
A6	28	0849	1.43443	1.08516
A6	29	0849	1.99168	1.63984
A6	30	0849	2.45106	2.09663
A6	31	0849	2.76424	2.40724
A6	32	0849	3.00278	2.64321
A6	33	0849	3.1937	2.83155
A6	34	0849	3.33164	2.9669
A6	35	0849	3.43164	3.06433
A6	36	0849	3.50869	3.1388
A6	37	0849	3.55806	3.18559
A6	38	0849	3.59587	3.22082
A6	39	0849	3.6482	3.27057
A6	40	0849	3.67545	3.29525
A7	1	0849	0.350703	-0.0173458
A7	2	0849	0.362856	-0.00861201
A7	3	0849	0.36992	-0.00496718
A7	4	0849	0.385908	0.00760148
A7	5	0849	0.386127	0.00440131
A7	6	0849	0.389419	0.00427323
A7	7	0849	0.388328	-0.000237377
A7	8	0849	0.388455	-0.00352981
A7	9	0849	0.388656	-0.00674804
A7	10	0849	0.393092	-0.00573073
A7	11	0849	0.400533	-0.00171
A7	12	0849	0.407221	0.00155908
A7	13	0849	0.410532	0.00145031
A7	14	0849	0.412207	-0.000293542
A7	15	0849	0.415246	-0.00067435
A7	16	0849	0.420723	0.00138327
A7	17	0849	0.424478	0.00171888
A7	18	0849	0.425836	-0.000342066
A7	19	0849	0.431443	0.00184555
A7	20	0849	0.433709	0.000692057
A7	21	0849	0.448803	0.0123664
A7	22	0849	0.470145	0.0302888
A7	23	0849	0.502406	0.0591305
A7	24	0849	0.577522	0.130827
A7	25	0849	0.702057	0.251943
A7	26	0849	0.940029	0.486496
A7	27	0849	1.32516	0.868204
A7	28	0849	1.842	1.38163
A7	29	0849	2.34874	1.88495
A7	30	0849	2.70634	2.23913
A7	31	0849	2.94188	2.47125
A7	32	0849	3.13514	2.66109
A7	33	0849	3.27685	2.79939
A7	34	0849	3.39028	2.90939
A7	35	0849	3.46806	2.98375
A7	36	0849	3.52112	3.0334
A7	37	0849	3.57291	3.08176
A7	38	0849	3.6014	3.10684
A7	39	0849	3.64291	3.14492
A7	40	0849	3.67294	3.17153
A8	1	0849	0.345432	-0.0298162
A8	2	0849	0.361936	-0.0173039
A8	3	0849	0.371127	-0.0121036
A8	4	0849	0.382406	-0.00481539
A8	5	0849	0.400832	0.00961923
A8	6	0849	0.402083	0.00687946
A8	7	0849	0.409345	0.0101506
A8	8	0849	0.404689	0.00150288
A8	9	0849	0.405603	-0.00157413
A8	10	0849	0.406722	-0.00444551
A8	11	0849	0.409001	-0.00615764
A8	12	0849	0.415904	-0.00324629
A8	13	0849	0.422821	-0.000320524
A8	14	0849	0.428353	0.00122125
A8	15	0849	0.434135	0.0030117
A8	16	0849	0.438056	0.00294192
A8	17	0849	0.44059	0.00148484
A8	18	0849	0.443391	0.000294345
A8	19	0849	0.445507	-0.00157994
A8	20	0849	0.448215	-0.00286324
A8	21	0849	0.456602	0.0015322
A8	22	0849	0.472723	0.0136621
A8	23	0849	0.493946	0.0308942
A8	24	0849	0.537102	0.0700597
A8	25	0849	0.622561	0.151528
A8	26	0849	0.776967	0.301942
A8	27	0849	1.03833	0.559317
A8	28	0849	1.42746	0.94445
A8	29	0849	1.8681	1.3811
A8	30	0849	2.18859	1.6976
A8	31	0849	2.4176	1.92262
A8	32	0849	2.5708	2.07183
A8	33	0849	2.71856	2.2156
A8	34	0849	2.81788	2.31093
A8	35	0849	2.88862	2.37768
A8	36	0849	2.9398	2.42486
A8	37	0849	2.9874	2.46848
A8	38	0849	3.02785	2.50493
A8	39	0849	3.04903	2.52212
A8	40	0849	3.07931	2.54841
A9	1	0849	0.323015	-0.0216247
A9	2	0849	0.329008	-0.0190084
A9	3	0849	0.341066	-0.0103264
A9	4	0849	0.349445	-0.00532438
A9	5	0849	0.358966	0.000820356
A9	6	0849	0.365158	0.00363525
A9	7	0849	0.374071	0.00917223
A9	8	0849	0.371301	0.00302545
A9	9	0849	0.373182	0.00152953
A9	10	0849	0.376245	0.00121611
A9	11	0849	0.376585	-0.00182014
A9	12	0849	0.384432	0.00265
A9	13	0849	0.387376	0.0022171
A9	14	0849	0.39173	0.0031949
A9	15	0849	0.391398	-0.000513787
A9	16	0849	0.390776	-0.00451206
A9	17	0849	0.401146	0.00248056
A9	18	0849	0.397229	-0.00481215
A9	19	0849	0.40172	-0.00369825
A9	20	0849	0.40986	0.00106569
A9	21	0849	0.415675	0.00350391
A9	22	0849	0.429046	0.0134981
A9	23	0849	0.452085	0.0331604
A9	24	0849	0.492312	0.0700108
A9	25	0849	0.579499	0.153822
A9	26	0849	0.737821	0.308767
A9	27	0849	1.01076	0.578327
A9	28	0849	1.43944	1.00364
A9	29	0849	1.97091	1.53173
A9	30	0849	2.39202	1.94946
A9	31	0849	2.70927	2.26333
A9	32	0849	2.9111	2.46178
A9	33	0849	3.08773	2.63504
A9	34	0849	3.21413	2.75807
A9	35	0849	3.31296	2.85352
A9	36	0849	3.3768	2.91398
A9	37	0849	3.42707	2.96088
A9	38	0849	3.47286	3.00329
A9	39	0849	3.50554	3.03259
A9	40	0849	3.53391	3.05758
A10	1	0849	0.361762	-0.0252199
A10	2	0849	0.370134	-0.0214303
A10	3	0849	0.382056	-0.0140919
A10	4	0849	0.395059	-0.00567214
A10	5	0849	0.40858	0.00326562
A10	6	0849	0.412821	0.00292351
A10	7	0849	0.41955	0.00506915
A10	8	0849	0.426253	0.00718957
A10	9	0849	0.432128	0.00848129
A10	10	0849	0.43127	0.00304027
A10	11	0849	0.435243	0.00242922
A10	12	0849	0.440993	0.0035968
A10	13	0849	0.440488	-0.00149169
A10	14	0849	0.443299	-0.00326407
A10	15	0849	0.445002	-0.00614421
A10	16	0849	0.450728	-0.00500106
A10	17	0849	0.45562	-0.00469208
A10	18	0849	0.469257	0.00436176
A10	19	0849	0.474045	0.00456608
A10	20	0849	0.494465	0.0204032
A10	21	0849	0.530005	0.0513593
A10	22	0849	0.593489	0.11026
A10	23	0849	0.712254	0.224443
A10	24	0849	0.919345	0.42695
A10	25	0849	1.27975	0.782768
A10	26	0849	1.77678	1.27522
A10	27	0849	2.2963	1.79016
A10	28	0849	2.67801	2.16729
A10	29	0849	2.98195	2.46664
A10	30	0849	3.20198	2.68208
A10	31	0849	3.3933	2.86882
A10	32	0849	3.51503	2.98597
A10	33	0849	3.6124	3.07876
A10	34	0849	3.68421	3.14598
A10	35	0849	3.75026	3.20745
A10	36	0849	3.77645	3.22905
A10	37	0849	3.82646	3.27448
A10	38	0849	3.86337	3.30681
A10	39	0849	3.87744	3.3163
A10	40	0849	3.90315	3.33742
A11	1	0849	0.311993	-0.0184774
A11	2	0849	0.32357	-0.0113864
A11	3	0849	0.337061	-0.00238133
A11	4	0849	0.344687	0.000758633
A11	5	0849	0.351525	0.00311074
A11	6	0849	0.354323	0.0014221
A11	7	0849	0.357349	-3.79559e-05
A11	8	0849	0.357518	-0.00435525
A11	9	0849	0.364323	-0.00203649
A11	10	0849	0.369837	-0.00100871
A11	11	0849	0.37976	0.00442868
A11	12	0849	0.379084	-0.000733895
A11	13	0849	0.386752	0.00244859
A11	14	0849	0.388395	-0.000394856
A11	15	0849	0.395683	0.00240709
A11	16	0849	0.394667	-0.00309479
A11	17	0849	0.401918	-0.000330307
A11	18	0849	0.406532	-0.000202257
A11	19	0849	0.412249	0.00102842
A11	20	0849	0.435346	0.0196397
A11	21	0849	0.461602	0.0414095
A11	22	0849	0.522225	0.0975465
A11	23	0849	0.634739	0.205574
A11	24	0849	0.836676	0.403025
A11	25	0849	1.18424	0.746103
A11	26	0849	1.65195	1.20933
A11	27	0849	2.11591	1.6688
A11	28	0849	2.47101	2.01942
A11	29	0849	2.74795	2.29187
A11	30	0849	2.97487	2.5143
A11	31	0849	3.13958	2.67453
A11	32	0849	3.26927	2.79973
A11	33	0849	3.37098	2.89696
A11	34	0849	3.44849	2.96998
A11	35	0849	3.50143	3.01843
A11	36	0849	3.55982	3.07233
A11	37	0849	3.59445	3.10248
A11	38	0849	3.63311	3.13665
A11	39	0849	3.65772	3.15677
A11	40	0849	3.67041	3.16498
A12	1	0849	0.305539	-0.0262199
A12	2	0849	0.32046	-0.0152922
A12	3	0849	0.332923	-0.00682228
A12	4	0849	0.342729	-0.00100946
A12	5	0849	0.353064	0.00533277
A12	6	0849	0.361967	0.010243
A12	7	0849	0.361627	0.0059096
A12	8	0849	0.359379	-0.000331183
A12	9	0849	0.357182	-0.00652157
A12	10	0849	0.363961	-0.00373553
A12	11	0849	0.366421	-0.00526785
A12	12	0849	0.372357	-0.00332479
A12	13	0849	0.378155	-0.0015199
A12	14	0849	0.38623	0.00256159
A12	15	0849	0.386336	-0.00132541
A12	16	0849	0.395106	0.00345151
A12	17	0849	0.398007	0.00235953
A12	18	0849	0.400776	0.00113594
A12	19	0849	0.411445	0.00781172
A12	20	0849	0.43225	0.0246234
A12	21	0849	0.461992	0.0503727
A12	22	0849	0.521069	0.105457
A12	23	0849	0.633642	0.214036
A12	24	0849	0.831963	0.408364
A12	25	0849	1.16753	0.73994
A12	26	0849	1.6293	1.19772
A12	27	0849	2.09026	1.65468
A12	28	0849	2.43571	1.99614
A12	29	0849	2.71477	2.27121
A12	30	0849	2.93702	2.48946
A12	31	0849	3.1084	2.65685
A12	32	0849	3.2289	2.77336
A12	33	0849	3.33481	2.87528
A12	34	0849	3.40007	2.93655
A12	35	0849	3.47043	3.0029
A12	36	0849	3.51644	3.04493
A12	37	0849	3.55924	3.08373
A12	38	0849	3.57936	3.09986
A12	39	0849	3.61927	3.13577
A12	40	0849	3.65186	3.16438
B1	1	0849	0.383474	-0.0467102
B1	2	0849	0.3962	-0.0381915
B1	3	0849	0.421422	-0.0171772
B1	4	0849	0.434331	-0.00847529
B1	5	0849	0.447878	0.000864434
B1	6	0849	0.457633	0.00641172
B1	7	0849	0.465012	0.0095829
B1	8	0849	0.469944	0.010308
B1	9	0849	0.472479	0.00863498
B1	10	0849	0.474868	0.00681663
B1	11	0849	0.470414	-0.00184494
B1	12	0849	0.477199	0.000732367
B1	13	0849	0.47628	-0.00439381
B1	14	0849	0.484059	-0.000822356
B1	15	0849	0.486589	-0.00249999
B1	16	0849	0.490106	-0.00319012
B1	17	0849	0.492556	-0.00494735
B1	18	0849	0.500576	-0.00113488
B1	19	0849	0.516105	0.0101863
B1	20	0849	0.53236	0.0222335
B1	21	0849	0.577035	0.0627012
B1	22	0849	0.655789	0.137248
B1	23	0849	0.808551	0.285802
B1	24	0849	1.06189	0.534931
B1	25	0849	1.45063	0.919464
B1	26	0849	1.90223	1.36686
B1	27	0849	2.27287	1.73329
B1	28	0849	2.5253	1.98151
B1	29	0849	2.7393	2.19131
B1	30	0849	2.90476	2.35256
B1	31	0849	3.02171	2.4653
B1	32	0849	3.11225	2.55164
B1	33	0849	3.18635	2.62153
B1	34	0849	3.23147	2.66244
B1	35	0849	3.27076	2.69752
B1	36	0849	3.31753	2.74008
B1	37	0849	3.34536	2.7637
B1	38	0849	3.36849	2.78263
B1	39	0849	3.38096	2.79089
B1	40	0849	3.39913	2.80485
B2	1	0849	0.377373	-0.0189237
B2	2	0849	0.388865	-0.0110192
B2	3	0849	0.399158	-0.00431287
B2	4	0849	0.402778	-0.00428024
B2	5	0849	0.408358	-0.00228831
B2	6	0849	0.413243	-0.000989738
B2	7	0849	0.421062	0.00324126
B2	8	0849	0.426343	0.00493496
B2	9	0849	0.434144	0.00914841
B2	10	0849	0.429799	0.00121646
B2	11	0849	0.429453	-0.00271647
B2	12	0849	0.438377	0.00261957
B2	13	0849	0.44168	0.0023352
B2	14	0849	0.442489	-0.000442951
B2	15	0849	0.444847	-0.00167215
B2	16	0849	0.44448	-0.0056263
B2	17	0849	0.452527	-0.00116683
B2	18	0849	0.458281	0.000999797
B2	19	0849	0.474791	0.013923
B2	20	0849	0.504053	0.039597
B2	21	0849	0.561276	0.0932334
B2	22	0849	0.655472	0.183842
B2	23	0849	0.840803	0.365585
B2	24	0849	1.15168	0.672872
B2	25	0849	1.6227	1.14031
B2	26	0849	2.13188	1.6459
B2	27	0849	2.53948	2.04991
B2	28	0849	2.82048	2.32733
B2	29	0849	3.05572	2.55898
B2	30	0849	3.23046	2.73013
B2	31	0849	3.35118	2.84727
B2	32	0849	3.44989	2.94238
B2	33	0849	3.51361	3.00252
B2	34	0849	3.57892	3.06424
B2	35	0849	3.61851	3.10024
B2	36	0849	3.66241	3.14056
B2	37	0849	3.68564	3.1602
B2	38	0849	3.7272	3.19817
B2	39	0849	3.74308	3.21046
B2	40	0849	3.76364	3.22744
B3	1	0849	0.334957	-0.022616
B3	2	0849	0.346206	-0.0161261
B3	3	0849	0.355604	-0.0114859
B3	4	0849	0.366175	-0.00567429
B3	5	0849	0.375181	-0.00142687
B3	6	0849	0.382991	0.00162483
B3	7	0849	0.390292	0.00416708
B3	8	0849	0.401031	0.010147
B3	9	0849	0.399617	0.00397518
B3	10	0849	0.407132	0.00673163
B3	11	0849	0.406753	0.00159349
B3	12	0849	0.41532	0.00540202
B3	13	0849	0.417084	0.00240727
B3	14	0849	0.415699	-0.00373633
B3	15	0849	0.420114	-0.00407966
B3	16	0849	0.424021	-0.00493135
B3	17	0849	0.428997	-0.00471415
B3	18	0849	0.438271	-0.000198565
B3	19	0849	0.451794	0.00856594
B3	20	0849	0.483268	0.0352808
B3	21	0849	0.542361	0.0896151
B3	22	0849	0.644079	0.186575
B3	23	0849	0.839047	0.376784
B3	24	0849	1.18134	0.714323
B3	25	0849	1.68598	1.2142
B3	26	0849	2.22525	1.74872
B3	27	0849	2.65718	2.17588
B3	28	0849	2.97289	2.48684
B3	29	0849	3.23955	2.74874
B3	30	0849	3.41295	2.91737
B3	31	0849	3.54316	3.04283
B3	32	0849	3.65831	3.15322
B3	33	0849	3.73587	3.22602
B3	34	0849	3.78605	3.27145
B3	35	0849	3.84005	3.32068
B3	36	0849	3.87074	3.34662
B3	37	0849	3.90166	3.37278
B3	38	0849	3.93006	3.39641
B3	39	0849	3.95	3.4116
B3	40	0849	3.97021	3.42705
B4	1	0849	0.331635	-0.0264677
B4	2	0849	0.347539	-0.0153159
B4	3	0849	0.353267	-0.0143395
B4	4	0849	0.362846	-0.00951165
B4	5	0849	0.374161	-0.00294939
B4	6	0849	0.386249	0.00438761
B4	7	0849	0.394841	0.0082274
B4	8	0849	0.402455	0.0110897
B4	9	0849	0.404266	0.00814935
B4	10	0849	0.405293	0.00442465
B4	11	0849	0.413974	0.00835394
B4	12	0849	0.411123	0.00075056
B4	13	0849	0.415241	0.000116842
B4	14	0849	0.418789	-0.0010867
B4	15	0849	0.419477	-0.0051503
B4	16	0849	0.421881	-0.00749843
B4	17	0849	0.429167	-0.0049641
B4	18	0849	0.437843	-0.00103979
B4	19	0849	0.452629	0.00899444
B4	20	0849	0.478091	0.0297045
B4	21	0849	0.532104	0.0789661
B4	22	0849	0.642095	0.184205
B4	23	0849	0.832329	0.369687
B4	24	0849	1.15762	0.690231
B4	25	0849	1.6376	1.16545
B4	26	0849	2.1419	1.665
B4	27	0849	2.55765	2.076
B4	28	0849	2.85699	2.37059
B4	29	0849	3.10483	2.61368
B4	30	0849	3.27892	2.78301
B4	31	0849	3.41834	2.91769
B4	32	0849	3.52216	3.01675
B4	33	0849	3.59069	3.08053
B4	34	0849	3.65908	3.14417
B4	35	0849	3.71557	3.19591
B4	36	0849	3.74893	3.22452
B4	37	0849	3.77842	3.24926
B4	38	0849	3.81262	3.2787
B4	39	0849	3.84084	3.30217
B4	40	0849	3.84636	3.30294
B5	1	0849	0.349108	-0.0241743
B5	2	0849	0.363357	-0.0134724
B5	3	0849	0.372565	-0.00781098
B5	4	0849	0.384033	0.000110586
B5	5	0849	0.387172	-0.000297505
B5	6	0849	0.397353	0.00633666
B5	7	0849	0.400161	0.00559783
B5	8	0849	0.398654	0.000544298
B5	9	0849	0.401396	-0.000260194
B5	10	0849	0.404024	-0.00117841
B5	11	0849	0.407511	-0.00123814
B5	12	0849	0.414399	0.0021026
B5	13	0849	0.414451	-0.00139206
B5	14	0849	0.419153	-0.00023663
B5	15	0849	0.421036	-0.0018997
B5	16	0849	0.424712	-0.00177021
B5	17	0849	0.431421	0.00139186
B5	18	0849	0.438478	0.00490236
B5	19	0849	0.458983	0.0218604
B5	20	0849	0.492236	0.0515671
B5	21	0849	0.548547	0.104331
B5	22	0849	0.658656	0.210893
B5	23	0849	0.861942	0.410633
B5	24	0849	1.20221	0.747358
B5	25	0849	1.69217	1.23376
B5	26	0849	2.19622	1.73427
B5	27	0849	2.60551	2.14001
B5	28	0849	2.89363	2.42459
B5	29	0849	3.13358	2.66099
B5	30	0849	3.29656	2.82042
B5	31	0849	3.43607	2.95639
B5	32	0849	3.53754	3.05432
B5	33	0849	3.61638	3.1296
B5	34	0849	3.68044	3.19011
B5	35	0849	3.71806	3.22419
B5	36	0849	3.76954	3.27212
B5	37	0849	3.78549	3.28453
B5	38	0849	3.82581	3.3213
B5	39	0849	3.85606	3.348
B5	40	0849	3.877	3.3654
B6	1	0849	0.309817	-0.0198506
B6	2	0849	0.322052	-0.0120307
B6	3	0849	0.32971	-0.00878743
B6	4	0849	0.342734	-0.000177704
B6	5	0849	0.348458	0.00113114
B6	6	0849	0.355004	0.00326211
B6	7	0849	0.360602	0.00444504
B6	8	0849	0.360979	0.000407042
B6	9	0849	0.366971	0.00198411
B6	10	0849	0.369608	0.000205785
B6	11	0849	0.377589	0.00377191
B6	12	0849	0.378546	0.000313846
B6	13	0849	0.38059	-0.00205718
B6	14	0849	0.387924	0.000861729
B6	15	0849	0.390358	-0.00111847
B6	16	0849	0.390022	-0.00586996
B6	17	0849	0.401935	0.00162805
B6	18	0849	0.405591	0.000869324
B6	19	0849	0.424907	0.0157701
B6	20	0849	0.461774	0.0482222
B6	21	0849	0.524901	0.106934
B6	22	0849	0.637575	0.215194
B6	23	0849	0.858116	0.43132
B6	24	0849	1.22113	0.789918
B6	25	0849	1.73178	1.29615
B6	26	0849	2.25529	1.81524
B6	27	0849	2.67068	2.22623
B6	28	0849	2.97264	2.52377
B6	29	0849	3.22922	2.77594
B6	30	0849	3.39603	2.93833
B6	31	0849	3.5362	3.07408
B6	32	0849	3.63964	3.17311
B6	33	0849	3.71446	3.24351
B6	34	0849	3.76709	3.29173
B6	35	0849	3.82064	3.34087
B6	36	0849	3.86124	3.37705
B6	37	0849	3.88834	3.39973
B6	38	0849	3.92196	3.42894
B6	39	0849	3.92522	3.42779
B6	40	0849	3.96002	3.45817
B7	1	0849	0.315083	-0.0213595
B7	2	0849	0.328943	-0.012792
B7	3	0849	0.336433	-0.0105941
B7	4	0849	0.343584	-0.00873562
B7	5	0849	0.346077	-0.0115349
B7	6	0849	0.365919	0.00301472
B7	7	0849	0.377786	0.00958893
B7	8	0849	0.384919	0.0114294
B7	9	0849	0.386991	0.00820945
B7	10	0849	0.392579	0.008505
B7	11	0849	0.397137	0.00777067
B7	12	0849	0.398251	0.00359197
B7	13	0849	0.400064	0.00011255
B7	14	0849	0.404723	-0.000520838
B7	15	0849	0.404078	-0.00645847
B7	16	0849	0.408446	-0.00738243
B7	17	0849	0.414125	-0.00699637
B7	18	0849	0.422023	-0.0043904
B7	19	0849	0.434015	0.0023092
B7	20	0849	0.457478	0.020479
B7	21	0849	0.50809	0.0657993
B7	22	0849	0.598993	0.151409
B7	23	0849	0.765436	0.31256
B7	24	0849	1.06513	0.606963
B7	25	0849	1.53864	1.07518
B7	26	0849	2.10981	1.64106
B7	27	0849	2.61844	2.14439
B7	28	0849	2.98801	2.50868
B7	29	0849	3.28146	2.79683
B7	30	0849	3.49117	3.00125
B7	31	0849	3.65696	3.16174
B7	32	0849	3.77472	3.27421
B7	33	0849	3.86404	3.35824
B7	34	0849	3.92512	3.41402
B7	35	0849	3.97955	3.46316
B7	36	0849	4.02859	3.50691
B7	37	0849	4.05433	3.52736
B7	38	0849	4.09812	3.56586
B7	39	0849	4.11141	3.57385
B7	40	0849	4.1291	3.58625
B8	1	0849	0.341819	-0.0210771
B8	2	0849	0.351822	-0.0151876
B8	3	0849	0.367379	-0.00374454
B8	4	0849	0.374553	-0.000684726
B8	5	0849	0.37529	-0.00406102
B8	6	0849	0.38885	0.00538441
B8	7	0849	0.392449	0.0048698
B8	8	0849	0.393148	0.00145511
B8	9	0849	0.392812	-0.00299439
B8	10	0849	0.399062	-0.000858454
B8	11	0849	0.406316	0.00228162
B8	12	0849	0.409085	0.000936676
B8	13	0849	0.414882	0.00262049
B8	14	0849	0.415381	-0.000994916
B8	15	0849	0.417574	-0.00291573
B8	16	0849	0.423564	-0.00103978
B8	17	0849	0.428463	-0.000254542
B8	18	0849	0.437339	0.00450755
B8	19	0849	0.450199	0.0132538
B8	20	0849	0.48237	0.0413111
B8	21	0849	0.531127	0.0859549
B8	22	0849	0.631129	0.181843
B8	23	0849	0.811885	0.358485
B8	24	0849	1.13281	0.675295
B8	25	0849	1.61529	1.15366
B8	26	0849	2.18201	1.71627
B8	27	0849	2.65038	2.18053
B8	28	0849	2.98999	2.51602
B8	29	0849	3.27943	2.80135
B8	30	0849	3.48229	3.00009
B8	31	0849	3.65411	3.1678
B8	32	0849	3.76343	3.273
B8	33	0849	3.85486	3.36032
B8	34	0849	3.91883	3.42018
B8	35	0849	3.97743	3.47467
B8	36	0849	4.02145	3.51457
B8	37	0849	4.06076	3.54977
B8	38	0849	4.09506	3.57995
B8	39	0849	4.11276	3.59354
B8	40	0849	4.14104	3.6177
B9	1	0849	0.318097	-0.0164253
B9	2	0849	0.329279	-0.0102363
B9	3	0849	0.336288	-0.00821969
B9	4	0849	0.345879	-0.00362123
B9	5	0849	0.352836	-0.00165687
B9	6	0849	0.35924	-0.000245402
B9	7	0849	0.367421	0.00294243
B9	8	0849	0.37742	0.00794967
B9	9	0849	0.379957	0.00549416
B9	10	0849	0.383006	0.00355021
B9	11	0849	0.387686	0.00323753
B9	12	0849	0.393322	0.00388104
B9	13	0849	0.392591	-0.00184243
B9	14	0849	0.398428	-0.000998494
B9	15	0849	0.401382	-0.00303689
B9	16	0849	0.401977	-0.00743404
B9	17	0849	0.406414	-0.00798986
B9	18	0849	0.416719	-0.00267703
B9	19	0849	0.432069	0.00767999
B9	20	0849	0.458565	0.0291833
B9	21	0849	0.508673	0.074299
B9	22	0849	0.60851	0.169143
B9	23	0849	0.794191	0.349832
B9	24	0849	1.11809	0.668733
B9	25	0849	1.59931	1.14496
B9	26	0849	2.14307	1.68373
B9	27	0849	2.59279	2.12846
B9	28	0849	2.9231	2.45378
B9	29	0849	3.19321	2.7189
B9	30	0849	3.39057	2.91126
B9	31	0849	3.52417	3.03987
B9	32	0849	3.64906	3.15977
B9	33	0849	3.71731	3.22303
B9	34	0849	3.80052	3.30124
B9	35	0849	3.83825	3.33398
B9	36	0849	3.90134	3.39208
B9	37	0849	3.92782	3.41357
B9	38	0849	3.95298	3.43373
B9	39	0849	3.97555	3.45131
B9	40	0849	3.99618	3.46695
B10	1	0849	0.293296	-0.0191119
B10	2	0849	0.300683	-0.0133346
B10	3	0849	0.303697	-0.0119297
B10	4	0849	0.311674	-0.00556233
B10	5	0849	0.312387	-0.00645852
B10	6	0849	0.318534	-0.00192086
B10	7	0849	0.318932	-0.0031321
B10	8	0849	0.3254	0.00172593
B10	9	0849	0.329742	0.00445886
B10	10	0849	0.33468	0.00778741
B10	11	0849	0.33365	0.00514771
B10	12	0849	0.337015	0.00690374
B10	13	0849	0.33736	0.00563892
B10	14	0849	0.339903	0.00657271
B10	15	0849	0.341908	0.00696877
B10	16	0849	0.340922	0.00437291
B10	17	0849	0.34001	0.00185184
B10	18	0849	0.339463	-0.000304315
B10	19	0849	0.34208	0.000702992
B10	20	0849	0.341074	-0.00191271
B10	21	0849	0.343034	-0.00156156
B10	22	0849	0.342802	-0.00340362
B10	23	0849	0.341515	-0.0062995
B10	24	0849	0.344128	-0.00529621
B10	25	0849	0.346683	-0.00435033
B10	26	0849	0.351103	-0.00153944
B10	27	0849	0.36611	0.0118574
B10	28	0849	0.389003	0.0331411
B10	29	0849	0.43767	0.0801995
B10	30	0849	0.528968	0.169888
B10	31	0849	0.696574	0.335885
B10	32	0849	1.00258	0.640284
B10	33	0849	1.43965	1.07575
B10	34	0849	1.8744	1.50888
B10	35	0849	2.31075	1.94362
B10	36	0849	2.68825	2.31951
B10	37	0849	2.96018	2.58984
B10	38	0849	3.1485	2.77655
B10	39	0849	3.29733	2.92377
B10	40	0849	3.41154	3.03637
B11	1	0849	0.326718	-0.0248668
B11	2	0849	0.338833	-0.0144837
B11	3	0849	0.343949	-0.0110992
B11	4	0849	0.34747	-0.00930947
B11	5	0849	0.351201	-0.00730888
B11	6	0849	0.359078	-0.00116404
B11	7	0849	0.365569	0.00359597
B11	8	0849	0.370196	0.00649153
B11	9	0849	0.371364	0.00592816
B11	10	0849	0.372344	0.00517669
B11	11	0849	0.373553	0.00465424
B11	12	0849	0.37551	0.00488064
B11	13	0849	0.376338	0.00397708
B11	14	0849	0.37881	0.00471816
B11	15	0849	0.380836	0.00501269
B11	16	0849	0.378104	0.000549602
B11	17	0849	0.382193	0.00290654
B11	18	0849	0.38469	0.00367254
B11	19	0849	0.379576	-0.00317328
B11	20	0849	0.380851	-0.00362909
B11	21	0849	0.381147	-0.00506423
B11	22	0849	0.38774	-0.000202555
B11	23	0849	0.383658	-0.00601572
B11	24	0849	0.389612	-0.0017931
B11	25	0849	0.390332	-0.00280427
B11	26	0849	0.400005	0.00513673
B11	27	0849	0.421166	0.0245669
B11	28	0849	0.461267	0.0629364
B11	29	0849	0.534694	0.134632
B11	30	0849	0.670678	0.268885
B11	31	0849	0.927301	0.523776
B11	32	0849	1.3258	0.920542
B11	33	0849	1.7939	1.38691
B11	34	0849	2.20847	1.79975
B11	35	0849	2.59364	2.18319
B11	36	0849	2.93066	2.51848
B11	37	0849	3.15993	2.74602
B11	38	0849	3.32154	2.9059
B11	39	0849	3.44832	3.03095
B11	40	0849	3.54529	3.12618
B12	1	0849	0.294123	-0.0106961
B12	2	0849	0.310476	0.00427302
B12	3	0849	0.313094	0.00550744
B12	4	0849	0.309916	0.000945159
B12	5	0849	0.309228	-0.00112562
B12	6	0849	0.318143	0.00640535
B12	7	0849	0.312209	-0.000912102
B12	8	0849	0.310226	-0.00427886
B12	9	0849	0.299391	-0.0164972
B12	10	0849	0.309732	-0.00753982
B12	11	0849	0.31976	0.00110432
B12	12	0849	0.322979	0.00293958
B12	13	0849	0.324048	0.00262526
B12	14	0849	0.327652	0.00484483
B12	15	0849	0.329627	0.00543662
B12	16	0849	0.330509	0.00493496
B12	17	0849	0.328877	0.00191975
B12	18	0849	0.329415	0.0010734
B12	19	0849	0.330269	0.000544535
B12	20	0849	0.328159	-0.00294898
B12	21	0849	0.32927	-0.0032219
B12	22	0849	0.329989	-0.00388717
B12	23	0849	0.335041	-0.00021811
B12	24	0849	0.338991	0.00234853
B12	25	0849	0.341544	0.00351748
B12	26	0849	0.355495	0.0160846
B12	27	0849	0.37803	0.0372365
B12	28	0849	0.420908	0.078731
B12	29	0849	0.510175	0.166614
B12	30	0849	0.670713	0.325768
B12	31	0849	0.955011	0.608682
B12	32	0849	1.34167	0.99396
B12	33	0849	1.76849	1.41939
B12	34	0849	2.19487	1.84439
B12	35	0849	2.57015	2.21828
B12	36	0849	2.82958	2.47633
B12	37	0849	3.03514	2.68051
B12	38	0849	3.18792	2.83191
B12	39	0849	3.2975	2.9401
B12	40	0849	3.38243	3.02365
C1	1	0725	0.187702	-0.014026
C1	2	0725	0.196317	-0.0105834
C1	3	0725	0.20373	-0.00834339
C1	4	0725	0.216044	-0.0012024
C1	5	0725	0.220666	-0.00175235
C1	6	0725	0.229351	0.00176
C1	7	0725	0.236518	0.0037544
C1	8	0725	0.243276	0.00533926
C1	9	0725	0.246921	0.00381175
C1	10	0725	0.249905	0.00162305
C1	11	0725	0.257054	0.00359962
C1	12	0725	0.26089	0.0022625
C1	13	0725	0.262324	-0.00147627
C1	14	0725	0.266663	-0.00231012
C1	15	0725	0.267791	-0.00635451
C1	16	0725	0.278607	-0.00071154
C1	17	0725	0.28374	-0.000750829
C1	18	0725	0.299407	0.00974339
C1	19	0725	0.323903	0.0290665
C1	20	0725	0.375886	0.0758772
C1	21	0725	0.471544	0.166362
C1	22	0725	0.646281	0.335927
C1	23	0725	0.940882	0.625355
C1	24	0725	1.38397	1.06327
C1	25	0725	1.89093	1.56506
C1	26	0725	2.32485	1.9938
C1	27	0725	2.57445	2.23824
C1	28	0725	2.72957	2.38818
C1	29	0725	2.86508	2.51852
C1	30	0725	2.96765	2.61591
C1	31	0725	3.04076	2.68386
C1	32	0725	3.10264	2.74056
C1	33	0725	3.14253	2.77527
C1	34	0725	3.18128	2.80885
C1	35	0725	3.20026	2.82266
C1	36	0725	3.21847	2.8357
C1	37	0725	3.23941	2.85146
C1	38	0725	3.25085	2.85773
C1	39	0725	3.2605	2.86221
C1	40	0725	3.26826	2.8648
C2	1	0725	0.38871	-0.0205597
C2	2	0725	0.400566	-0.0137498
C2	3	0725	0.4108	-0.0085625
C2	4	0725	0.422691	-0.00171876
C2	5	0725	0.433373	0.00391718
C2	6	0725	0.437923	0.00342082
C2	7	0725	0.441539	0.00199012
C2	8	0725	0.445949	0.00135345
C2	9	0725	0.452615	0.00297216
C2	10	0725	0.456651	0.00196183
C2	11	0725	0.458622	-0.0011139
C2	12	0725	0.468451	0.00366785
C2	13	0725	0.466117	-0.00371276
C2	14	0725	0.474414	-0.000462461
C2	15	0725	0.47621	-0.00371303
C2	16	0725	0.479828	-0.0051409
C2	17	0725	0.490716	0.000699488
C2	18	0725	0.503919	0.00885587
C2	19	0725	0.533308	0.0331988
C2	20	0725	0.584742	0.0795864
C2	21	0725	0.681588	0.171386
C2	22	0725	0.85728	0.342031
C2	23	0725	1.15941	0.639115
C2	24	0725	1.60328	1.07794
C2	25	0725	2.12411	1.59372
C2	26	0725	2.55923	2.02379
C2	27	0725	2.8207	2.28022
C2	28	0725	2.9665	2.42097
C2	29	0725	3.11331	2.56273
C2	30	0725	3.21012	2.6545
C2	31	0725	3.28299	2.72232
C2	32	0725	3.34371	2.778
C2	33	0725	3.38403	2.81327
C2	34	0725	3.41164	2.83583
C2	35	0725	3.44308	2.86222
C2	36	0725	3.46432	2.87842
C2	37	0725	3.4757	2.88475
C2	38	0725	3.4878	2.8918
C2	39	0725	3.50026	2.89921
C2	40	0725	3.50585	2.89976
C3	1	0725	0.317034	-0.0325355
C3	2	0725	0.334417	-0.0203417
C3	3	0725	0.351781	-0.0081677
C3	4	0725	0.366057	0.000918609
C3	5	0725	0.372578	0.00224984
C3	6	0725	0.374352	-0.00116485
C3	7	0725	0.381176	0.000469055
C3	8	0725	0.388274	0.0023772
C3	9	0725	0.394273	0.0031869
C3	10	0725	0.400687	0.00441153
C3	11	0725	0.404703	0.00323824
C3	12	0725	0.407105	0.000449955
C3	13	0725	0.411243	-0.000600701
C3	14	0725	0.415325	-0.00170834
C3	15	0725	0.419491	-0.00273179
C3	16	0725	0.424485	-0.00292795
C3	17	0725	0.434033	0.00143099
C3	18	0725	0.448219	0.0104274
C3	19	0725	0.478149	0.0351678
C3	20	0725	0.535156	0.086985
C3	21	0725	0.643314	0.189953
C3	22	0725	0.835997	0.377447
C3	23	0725	1.15187	0.688132
C3	24	0725	1.63089	1.16196
C3	25	0725	2.18313	1.70901
C3	26	0725	2.63492	2.15561
C3	27	0725	2.90559	2.42109
C3	28	0725	3.0717	2.58202
C3	29	0725	3.21787	2.72299
C3	30	0725	3.32078	2.82071
C3	31	0725	3.40838	2.90313
C3	32	0725	3.4627	2.95226
C3	33	0725	3.509	2.99337
C3	34	0725	3.54454	3.02371
C3	35	0725	3.57525	3.04923
C3	36	0725	3.59463	3.06343
C3	37	0725	3.60067	3.06428
C3	38	0725	3.62351	3.08193
C3	39	0725	3.62661	3.07984
C3	40	0725	3.64531	3.09334
C4	1	0725	0.376123	-0.0255083
C4	2	0725	0.386441	-0.0182407
C4	3	0725	0.400295	-0.00743806
C4	4	0725	0.409848	-0.000935374
C4	5	0725	0.416638	0.00280416
C4	6	0725	0.419344	0.00245956
C4	7	0725	0.423661	0.00372541
C4	8	0725	0.420291	-0.00269493
C4	9	0725	0.424975	-0.00106158
C4	10	0725	0.431344	0.00225703
C4	11	0725	0.433627	0.00148962
C4	12	0725	0.437132	0.00194342
C4	13	0725	0.439518	0.00127859
C4	14	0725	0.44202	0.000730226
C4	15	0725	0.44528	0.000939588
C4	16	0725	0.448154	0.00076292
C4	17	0725	0.448512	-0.0019293
C4	18	0725	0.451509	-0.00198309
C4	19	0725	0.454195	-0.00234817
C4	20	0725	0.461734	0.00214045
C4	21	0725	0.472702	0.0100579
C4	22	0725	0.487604	0.0219098
C4	23	0725	0.519782	0.0510372
C4	24	0725	0.592575	0.120779
C4	25	0725	0.719068	0.244221
C4	26	0725	0.944147	0.46625
C4	27	0725	1.32436	0.843408
C4	28	0725	1.85499	1.37099
C4	29	0725	2.41236	1.92531
C4	30	0725	2.78105	2.29095
C4	31	0725	3.00745	2.5143
C4	32	0725	3.17926	2.68306
C4	33	0725	3.31995	2.8207
C4	34	0725	3.42017	2.91787
C4	35	0725	3.50491	2.99955
C4	36	0725	3.54743	3.03902
C4	37	0725	3.58537	3.07392
C4	38	0725	3.62291	3.10841
C4	39	0725	3.65517	3.13761
C4	40	0725	3.65669	3.13609
C5	1	0725	0.342297	-0.0132029
C5	2	0725	0.354171	-0.00495435
C5	3	0725	0.360161	-0.00259034
C5	4	0725	0.368357	0.00197903
C5	5	0725	0.369345	-0.000658985
C5	6	0725	0.376656	0.00302657
C5	7	0725	0.374011	-0.00324494
C5	8	0725	0.379565	-0.00131716
C5	9	0725	0.385547	0.00103895
C5	10	0725	0.392233	0.0040989
C5	11	0725	0.392156	0.000396581
C5	12	0725	0.396882	0.00149604
C5	13	0725	0.394279	-0.00473292
C5	14	0725	0.403146	0.000508264
C5	15	0725	0.404658	-0.00160577
C5	16	0725	0.418133	0.00824249
C5	17	0725	0.437163	0.0236469
C5	18	0725	0.470159	0.0530174
C5	19	0725	0.534864	0.114096
C5	20	0725	0.648051	0.223657
C5	21	0725	0.8525	0.42448
C5	22	0725	1.15645	0.724808
C5	23	0725	1.51624	1.08097
C5	24	0725	1.84006	1.40117
C5	25	0725	2.09866	1.65613
C5	26	0725	2.30424	1.85809
C5	27	0725	2.44441	1.99464
C5	28	0725	2.5527	2.0993
C5	29	0725	2.64666	2.18963
C5	30	0725	2.70593	2.24528
C5	31	0725	2.76052	2.29624
C5	32	0725	2.818	2.35009
C5	33	0725	2.85931	2.38778
C5	34	0725	2.89302	2.41786
C5	35	0725	2.92815	2.44937
C5	36	0725	2.95117	2.46876
C5	37	0725	2.965	2.47897
C5	38	0725	2.98348	2.49382
C5	39	0725	2.99668	2.50339
C5	40	0725	3.00059	2.50367
C6	1	0725	0.352537	-0.0323652
C6	2	0725	0.365825	-0.0230297
C6	3	0725	0.36965	-0.0231587
C6	4	0725	0.386078	-0.0106833
C6	5	0725	0.392704	-0.00801068
C6	6	0725	0.406701	0.00203291
C6	7	0725	0.42156	0.0129392
C6	8	0725	0.422864	0.0102897
C6	9	0725	0.429422	0.0128953
C6	10	0725	0.431969	0.0114886
C6	11	0725	0.430756	0.0063229
C6	12	0725	0.433148	0.00476206
C6	13	0725	0.440208	0.00786886
C6	14	0725	0.438213	0.00192038
C6	15	0725	0.437703	-0.00254252
C6	16	0725	0.442923	-0.00127574
C6	17	0725	0.442671	-0.0054804
C6	18	0725	0.446382	-0.00572276
C6	19	0725	0.448063	-0.00799468
C6	20	0725	0.45436	-0.00565114
C6	21	0725	0.463697	-0.000267173
C6	22	0725	0.484089	0.0161716
C6	23	0725	0.525492	0.0536222
C6	24	0725	0.602239	0.126415
C6	25	0725	0.736649	0.256873
C6	26	0725	0.986555	0.502826
C6	27	0725	1.39832	0.910637
C6	28	0725	1.9531	1.46147
C6	29	0725	2.53882	2.04323
C6	30	0725	2.94152	2.44198
C6	31	0725	3.17643	2.67293
C6	32	0725	3.31578	2.80833
C6	33	0725	3.43427	2.92287
C6	34	0725	3.52947	3.01412
C6	35	0725	3.60004	3.08073
C6	36	0725	3.63653	3.11327
C6	37	0725	3.68164	3.15443
C6	38	0725	3.7143	3.18314
C6	39	0725	3.73339	3.19827
C6	40	0725	3.75672	3.21765
C7	1	0725	0.374204	-0.0269165
C7	2	0725	0.392723	-0.0124359
C7	3	0725	0.401975	-0.00722174
C7	4	0725	0.413614	0.000379421
C7	5	0725	0.422675	0.00540325
C7	6	0725	0.422201	0.000891281
C7	7	0725	0.424895	-0.000452816
C7	8	0725	0.4268	-0.00258539
C7	9	0725	0.432771	-0.000652665
C7	10	0725	0.441967	0.00450539
C7	11	0725	0.443122	0.00162269
C7	12	0725	0.446291	0.000754207
C7	13	0725	0.451264	0.00168921
C7	14	0725	0.45541	0.00179673
C7	15	0725	0.458619	0.00096827
C7	16	0725	0.457107	-0.00458165
C7	17	0725	0.46321	-0.00251618
C7	18	0725	0.467893	-0.001871
C7	19	0725	0.479958	0.00615612
C7	20	0725	0.499155	0.0213152
C7	21	0725	0.536108	0.0542303
C7	22	0725	0.609493	0.123577
C7	23	0725	0.7446	0.254646
C7	24	0725	0.990759	0.496768
C7	25	0725	1.39521	0.897183
C7	26	0725	1.95157	1.4495
C7	27	0725	2.44198	1.93587
C7	28	0725	2.80391	2.29376
C7	29	0725	3.13111	2.61693
C7	30	0725	3.36229	2.84407
C7	31	0725	3.52388	3.00163
C7	32	0725	3.63239	3.10609
C7	33	0725	3.69663	3.1663
C7	34	0725	3.75208	3.21771
C7	35	0725	3.80009	3.26168
C7	36	0725	3.82457	3.28213
C7	37	0725	3.84706	3.30057
C7	38	0725	3.87641	3.32588
C7	39	0725	3.89281	3.33825
C7	40	0725	3.8944	3.3358
C8	1	0725	0.361212	-0.0296212
C8	2	0725	0.376144	-0.0175442
C8	3	0725	0.388887	-0.0076563
C8	4	0725	0.402832	0.00343236
C8	5	0725	0.409624	0.00736953
C8	6	0725	0.409848	0.00473834
C8	7	0725	0.414094	0.00612831
C8	8	0725	0.41072	-0.000101192
C8	9	0725	0.408501	-0.00517502
C8	10	0725	0.408525	-0.00800655
C8	11	0725	0.417315	-0.00207175
C8	12	0725	0.419892	-0.00235017
C8	13	0725	0.423478	-0.00162017
C8	14	0725	0.425657	-0.00229676
C8	15	0725	0.431891	0.00108162
C8	16	0725	0.4329	-0.000764043
C8	17	0725	0.43905	0.00253
C8	18	0725	0.444137	0.0047618
C8	19	0725	0.452517	0.0102865
C8	20	0725	0.46786	0.0227734
C8	21	0725	0.496932	0.0489907
C8	22	0725	0.550751	0.0999539
C8	23	0725	0.654789	0.201137
C8	24	0725	0.850799	0.394291
C8	25	0725	1.18048	0.721119
C8	26	0725	1.67381	1.21159
C8	27	0725	2.25676	1.79169
C8	28	0725	2.75278	2.28485
C8	29	0725	3.09253	2.62174
C8	30	0725	3.28297	2.80933
C8	31	0725	3.43419	2.95769
C8	32	0725	3.56201	3.08266
C8	33	0725	3.65998	3.17778
C8	34	0725	3.72481	3.23975
C8	35	0725	3.78927	3.30135
C8	36	0725	3.82575	3.33498
C8	37	0725	3.85426	3.36063
C8	38	0725	3.87927	3.38278
C8	39	0725	3.89903	3.39969
C8	40	0725	3.90393	3.40173
C9	1	0725	0.362311	-0.0205529
C9	2	0725	0.375742	-0.0109178
C9	3	0725	0.384312	-0.00614501
C9	4	0725	0.391683	-0.00257069
C9	5	0725	0.392721	-0.00532894
C9	6	0725	0.406431	0.00458357
C9	7	0725	0.409365	0.00372146
C9	8	0725	0.411816	0.00237563
C9	9	0725	0.418566	0.00532837
C9	10	0725	0.417104	6.99719e-05
C9	11	0725	0.424378	0.00354777
C9	12	0725	0.427144	0.00251644
C9	13	0725	0.429884	0.00145967
C9	14	0725	0.432861	0.000639907
C9	15	0725	0.432396	-0.00362142
C9	16	0725	0.436695	-0.0031193
C9	17	0725	0.440154	-0.00345742
C9	18	0725	0.44473	-0.00267742
C9	19	0725	0.455083	0.00387857
C9	20	0725	0.470713	0.0157124
C9	21	0725	0.498393	0.039595
C9	22	0725	0.55592	0.0933255
C9	23	0725	0.657591	0.1912
C9	24	0725	0.85221	0.382022
C9	25	0725	1.18619	0.712209
C9	26	0725	1.68791	1.21013
C9	27	0725	2.30416	1.82258
C9	28	0725	2.83407	2.34869
C9	29	0725	3.18437	2.69519
C9	30	0725	3.3863	2.89333
C9	31	0725	3.5563	3.05953
C9	32	0725	3.69416	3.1936
C9	33	0725	3.7941	3.28974
C9	34	0725	3.86795	3.3598
C9	35	0725	3.91476	3.40281
C9	36	0725	3.9587	3.44295
C9	37	0725	3.99024	3.4707
C9	38	0725	4.01468	3.49134
C9	39	0725	4.02954	3.5024
C9	40	0725	4.04363	3.51269
C10	1	0725	0.384648	-0.0405382
C10	2	0725	0.413446	-0.0144846
C10	3	0725	0.425493	-0.0051812
C10	4	0725	0.432301	-0.00111697
C10	5	0725	0.437684	0.001522
C10	6	0725	0.439745	0.0008386
C10	7	0725	0.446208	0.00455826
C10	8	0725	0.446575	0.00218069
C10	9	0725	0.448148	0.00100975
C10	10	0725	0.44797	-0.00191129
C10	11	0725	0.45508	0.00245466
C10	12	0725	0.455034	-0.000336064
C10	13	0725	0.457082	-0.00103183
C10	14	0725	0.45818	-0.00267811
C10	15	0725	0.462685	-0.000916437
C10	16	0725	0.466953	0.00060795
C10	17	0725	0.470757	0.00166706
C10	18	0725	0.484963	0.0131292
C10	19	0725	0.499769	0.0251917
C10	20	0725	0.534398	0.0570765
C10	21	0725	0.600201	0.120136
C10	22	0725	0.722217	0.239407
C10	23	0725	0.943131	0.457578
C10	24	0725	1.32195	0.833654
C10	25	0725	1.86403	1.37299
C10	26	0725	2.46025	1.96646
C10	27	0725	2.89947	2.40294
C10	28	0725	3.15218	2.65291
C10	29	0725	3.31586	2.81385
C10	30	0725	3.44277	2.93801
C10	31	0725	3.54179	3.03429
C10	32	0725	3.62268	3.11243
C10	33	0725	3.66337	3.15037
C10	34	0725	3.70994	3.1942
C10	35	0725	3.74621	3.22773
C10	36	0725	3.76988	3.24865
C10	37	0725	3.77394	3.24998
C10	38	0725	3.80042	3.27371
C10	39	0725	3.80603	3.27657
C10	40	0725	3.81532	3.28312
C11	1	0725	0.361	-0.0172449
C11	2	0725	0.37289	-0.00876493
C11	3	0725	0.379571	-0.00549474
C11	4	0725	0.384937	-0.00353814
C11	5	0725	0.390556	-0.00132986
C11	6	0725	0.397191	0.00189509
C11	7	0725	0.403331	0.0046247
C11	8	0725	0.402995	0.000879221
C11	9	0725	0.407602	0.00207562
C11	10	0725	0.41214	0.00320401
C11	11	0725	0.417753	0.00540627
C11	12	0725	0.416157	0.000400449
C11	13	0725	0.419777	0.000609915
C11	14	0725	0.422703	0.000125791
C11	15	0725	0.422008	-0.00397919
C11	16	0725	0.42494	-0.00445709
C11	17	0725	0.432385	-0.000422049
C11	18	0725	0.43941	0.0031932
C11	19	0725	0.453067	0.0134396
C11	20	0725	0.475762	0.0327242
C11	21	0725	0.523653	0.0772059
C11	22	0725	0.615994	0.166137
C11	23	0725	0.780445	0.327177
C11	24	0725	1.07302	0.616347
C11	25	0725	1.51871	1.05862
C11	26	0725	2.06382	1.60032
C11	27	0725	2.54619	2.07928
C11	28	0725	2.83637	2.36605
C11	29	0725	3.01735	2.54362
C11	30	0725	3.14784	2.6707
C11	31	0725	3.26502	2.78447
C11	32	0725	3.34913	2.86517
C11	33	0725	3.4201	2.93273
C11	34	0725	3.45862	2.96784
C11	35	0725	3.50443	3.01024
C11	36	0725	3.53251	3.03491
C11	37	0725	3.54044	3.03943
C11	38	0725	3.56776	3.06334
C11	39	0725	3.58118	3.07335
C11	40	0725	3.59666	3.08542
C12	1	0725	0.343868	-0.0235068
C12	2	0725	0.357413	-0.014636
C12	3	0725	0.367742	-0.00898124
C12	4	0725	0.379794	-0.00160368
C12	5	0725	0.383921	-0.00215109
C12	6	0725	0.39066	-8.64767e-05
C12	7	0725	0.398203	0.00278223
C12	8	0725	0.40317	0.00307516
C12	9	0725	0.41162	0.00685081
C12	10	0725	0.414035	0.00459174
C12	11	0725	0.416642	0.0025239
C12	12	0725	0.422477	0.00368431
C12	13	0725	0.425603	0.0021362
C12	14	0725	0.427974	-0.000166958
C12	15	0725	0.431139	-0.0016763
C12	16	0725	0.430135	-0.00735412
C12	17	0725	0.438539	-0.00362448
C12	18	0725	0.446641	-0.000197186
C12	19	0725	0.460785	0.00927274
C12	20	0725	0.488204	0.0320178
C12	21	0725	0.535438	0.0745772
C12	22	0725	0.630938	0.165403
C12	23	0725	0.804735	0.334525
C12	24	0725	1.10219	0.627302
C12	25	0725	1.54894	1.06939
C12	26	0725	2.07369	1.58946
C12	27	0725	2.5067	2.01779
C12	28	0725	2.75903	2.26544
C12	29	0725	2.91259	2.41433
C12	30	0725	3.05134	2.54841
C12	31	0725	3.16562	2.65801
C12	32	0725	3.23613	2.72386
C12	33	0725	3.29236	2.77541
C12	34	0725	3.3388	2.81718
C12	35	0725	3.36668	2.84037
C12	36	0725	3.3973	2.86633
C12	37	0725	3.41506	2.87941
C12	38	0725	3.43313	2.8928
C12	39	0725	3.43906	2.89406
C12	40	0725	3.44801	2.89833
D1	1	0725	0.366915	-0.021817
D1	2	0725	0.379176	-0.0127798
D1	3	0725	0.390064	-0.00511546
D1	4	0725	0.404097	0.00569397
D1	5	0725	0.405385	0.00375865
D1	6	0725	0.408884	0.00403469
D1	7	0725	0.407578	-0.000494739
D1	8	0725	0.407571	-0.00372566
D1	9	0725	0.415893	0.00137348
D1	10	0725	0.412281	-0.00546248
D1	11	0725	0.415962	-0.00500464
D1	12	0725	0.423975	-0.000215276
D1	13	0725	0.428318	0.00090459
D1	14	0725	0.428486	-0.00215139
D1	15	0725	0.435234	0.00137302
D1	16	0725	0.442115	0.00503124
D1	17	0725	0.451385	0.0110773
D1	18	0725	0.464011	0.02048
D1	19	0725	0.495491	0.0487364
D1	20	0725	0.546836	0.0968584
D1	21	0725	0.641375	0.188174
D1	22	0725	0.824586	0.368162
D1	23	0725	1.12878	0.669134
D1	24	0725	1.56408	1.10121
D1	25	0725	2.05742	1.59132
D1	26	0725	2.44542	1.9761
D1	27	0725	2.6716	2.19906
D1	28	0725	2.80856	2.3328
D1	29	0725	2.95114	2.47216
D1	30	0725	3.04383	2.56162
D1	31	0725	3.10706	2.62163
D1	32	0725	3.17035	2.68169
D1	33	0725	3.20999	2.7181
D1	34	0725	3.23797	2.74286
D1	35	0725	3.26795	2.76962
D1	36	0725	3.29417	2.79262
D1	37	0725	3.30973	2.80496
D1	38	0725	3.32458	2.81658
D1	39	0725	3.3233	2.81207
D1	40	0725	3.34977	2.83532
D2	1	0725	0.327849	-0.0175044
D2	2	0725	0.34009	-0.00964239
D2	3	0725	0.349466	-0.00464461
D2	4	0725	0.352498	-0.00599085
D2	5	0725	0.364085	0.00121832
D2	6	0725	0.367791	0.000545791
D2	7	0725	0.373656	0.00203238
D2	8	0725	0.380281	0.00427988
D2	9	0725	0.386092	0.0057122
D2	10	0725	0.387404	0.00264636
D2	11	0725	0.391916	0.0027802
D2	12	0725	0.394612	0.00109746
D2	13	0725	0.396459	-0.00143372
D2	14	0725	0.399224	-0.00304711
D2	15	0725	0.404174	-0.00247513
D2	16	0725	0.407903	-0.0031248
D2	17	0725	0.415809	0.000403636
D2	18	0725	0.422784	0.00300063
D2	19	0725	0.447815	0.0236533
D2	20	0725	0.489257	0.0607164
D2	21	0725	0.574018	0.141099
D2	22	0725	0.725023	0.287727
D2	23	0725	0.986272	0.544597
D2	24	0725	1.40739	0.961337
D2	25	0725	1.93675	1.48632
D2	26	0725	2.4189	1.96409
D2	27	0725	2.72931	2.27012
D2	28	0725	2.88976	2.4262
D2	29	0725	3.03705	2.5691
D2	30	0725	3.14416	2.67184
D2	31	0725	3.23352	2.75681
D2	32	0725	3.28616	2.80508
D2	33	0725	3.33863	2.85318
D2	34	0725	3.37517	2.88534
D2	35	0725	3.39684	2.90263
D2	36	0725	3.4163	2.91771
D2	37	0725	3.43682	2.93385
D2	38	0725	3.46121	2.95386
D2	39	0725	3.4548	2.94307
D2	40	0725	3.46267	2.94656
D3	1	0725	0.374305	-0.0199129
D3	2	0725	0.383568	-0.0172428
D3	3	0725	0.398523	-0.00888067
D3	4	0725	0.406492	-0.00750464
D3	5	0725	0.418475	-0.00211484
D3	6	0725	0.428988	0.00180497
D3	7	0725	0.437506	0.00373052
D3	8	0725	0.448428	0.00805901
D3	9	0725	0.45477	0.00780857
D3	10	0725	0.460245	0.00668958
D3	11	0725	0.466144	0.00599557
D3	12	0725	0.467947	0.00120606
D3	13	0725	0.472608	-0.00072567
D3	14	0725	0.475168	-0.00475897
D3	15	0725	0.481287	-0.00523352
D3	16	0725	0.487037	-0.00607598
D3	17	0725	0.495717	-0.0039891
D3	18	0725	0.507326	0.00102698
D3	19	0725	0.536042	0.0231494
D3	20	0725	0.577141	0.0576553
D3	21	0725	0.66409	0.138012
D3	22	0725	0.823798	0.291126
D3	23	0725	1.1063	0.56703
D3	24	0725	1.53503	0.989167
D3	25	0725	2.09132	1.53887
D3	26	0725	2.58964	2.0306
D3	27	0725	2.9134	2.34776
D3	28	0725	3.08142	2.50919
D3	29	0725	3.22775	2.64893
D3	30	0725	3.33903	2.75361
D3	31	0725	3.42605	2.83404
D3	32	0725	3.48836	2.88975
D3	33	0725	3.53312	2.92792
D3	34	0725	3.55704	2.94525
D3	35	0725	3.59634	2.97795
D3	36	0725	3.6111	2.98612
D3	37	0725	3.63027	2.9987
D3	38	0725	3.65154	3.01338
D3	39	0725	3.65624	3.01149
D3	40	0725	3.66318	3.01184
D4	1	0725	0.371142	-0.0233662
D4	2	0725	0.380123	-0.0207859
D4	3	0725	0.394543	-0.0127678
D4	4	0725	0.411222	-0.00249016
D4	5	0725	0.422755	0.00264177
D4	6	0725	0.434384	0.00786974
D4	7	0725	0.442104	0.0091888
D4	8	0725	0.442296	0.00297967
D4	9	0725	0.448676	0.00295771
D4	10	0725	0.451973	-0.000146041
D4	11	0725	0.455328	-0.00319284
D4	12	0725	0.46375	-0.00117128
D4	13	0725	0.465453	-0.00586958
D4	14	0725	0.475279	-0.00244517
D4	15	0725	0.488396	0.0042705
D4	16	0725	0.50799	0.0174633
D4	17	0725	0.557721	0.0607929
D4	18	0725	0.64315	0.139821
D4	19	0725	0.802544	0.292814
D4	20	0725	1.07997	0.563836
D4	21	0725	1.48128	0.958746
D4	22	0725	1.94595	1.41702
D4	23	0725	2.38135	1.84601
D4	24	0725	2.71075	2.16902
D4	25	0725	2.96319	2.41506
D4	26	0725	3.13291	2.57837
D4	27	0725	3.28084	2.7199
D4	28	0725	3.37397	2.80663
D4	29	0725	3.46967	2.89593
D4	30	0725	3.51479	2.93465
D4	31	0725	3.57902	2.99248
D4	32	0725	3.61252	3.01957
D4	33	0725	3.65566	3.05631
D4	34	0725	3.6747	3.06895
D4	35	0725	3.69173	3.07958
D4	36	0725	3.70237	3.08382
D4	37	0725	3.71105	3.0861
D4	38	0725	3.71837	3.08701
D4	39	0725	3.71454	3.07679
D4	40	0725	3.71509	3.07093
D5	1	0725	0.355979	-0.0191699
D5	2	0725	0.366813	-0.0136035
D5	3	0725	0.380088	-0.00559593
D5	4	0725	0.386521	-0.00443028
D5	5	0725	0.394301	-0.0019179
D5	6	0725	0.402906	0.00141974
D5	7	0725	0.409011	0.00225723
D5	8	0725	0.415297	0.00327538
D5	9	0725	0.423813	0.00652365
D5	10	0725	0.428617	0.00605991
D5	11	0725	0.429263	0.00143896
D5	12	0725	0.434761	0.00166914
D5	13	0725	0.437508	-0.000850782
D5	14	0725	0.440577	-0.00304919
D5	15	0725	0.446455	-0.00243954
D5	16	0725	0.451287	-0.00287461
D5	17	0725	0.457943	-0.00148577
D5	18	0725	0.467791	0.00309409
D5	19	0725	0.489934	0.0199701
D5	20	0725	0.532992	0.0577604
D5	21	0725	0.606905	0.126406
D5	22	0725	0.752954	0.267188
D5	23	0725	1.00519	0.514152
D5	24	0725	1.41818	0.921883
D5	25	0725	1.97205	1.47048
D5	26	0725	2.54095	2.03411
D5	27	0725	2.93612	2.42402
D5	28	0725	3.15758	2.6402
D5	29	0725	3.32259	2.79995
D5	30	0725	3.43152	2.90361
D5	31	0725	3.51639	2.98321
D5	32	0725	3.58665	3.04821
D5	33	0725	3.63056	3.08685
D5	34	0725	3.65829	3.10932
D5	35	0725	3.69607	3.14183
D5	36	0725	3.70927	3.14976
D5	37	0725	3.74509	3.18031
D5	38	0725	3.76101	3.19097
D5	39	0725	3.76154	3.18623
D5	40	0725	3.77559	3.19501
D6	1	0725	0.362097	-0.0194565
D6	2	0725	0.37271	-0.0142463
D6	3	0725	0.383058	-0.00930069
D6	4	0725	0.392453	-0.00530885
D6	5	0725	0.398068	-0.00509612
D6	6	0725	0.412957	0.00438983
D6	7	0725	0.420895	0.00692574
D6	8	0725	0.423638	0.00426598
D6	9	0725	0.431643	0.00686772
D6	10	0725	0.435969	0.00579117
D6	11	0725	0.441633	0.00605289
D6	12	0725	0.44041	-0.00057294
D6	13	0725	0.447461	0.00107456
D6	14	0725	0.448049	-0.00373997
D6	15	0725	0.450969	-0.00622266
D6	16	0725	0.457467	-0.00512665
D6	17	0725	0.461991	-0.00600582
D6	18	0725	0.47611	0.00271056
D6	19	0725	0.495381	0.0165784
D6	20	0725	0.527171	0.0429662
D6	21	0725	0.596666	0.107059
D6	22	0725	0.729116	0.234105
D6	23	0725	0.954465	0.454052
D6	24	0725	1.33786	0.832041
D6	25	0725	1.88227	1.37105
D6	26	0725	2.47535	1.95873
D6	27	0725	2.90818	2.38616
D6	28	0725	3.15706	2.62963
D6	29	0725	3.31597	2.78315
D6	30	0725	3.43811	2.89988
D6	31	0725	3.52824	2.98461
D6	32	0725	3.59485	3.04581
D6	33	0725	3.65428	3.09984
D6	34	0725	3.68696	3.12712
D6	35	0725	3.7264	3.16116
D6	36	0725	3.74501	3.17436
D6	37	0725	3.75891	3.18286
D6	38	0725	3.77277	3.19132
D6	39	0725	3.77643	3.18958
D6	40	0725	3.80917	3.21691
D7	1	0725	0.352808	-0.0261277
D7	2	0725	0.369	-0.0131114
D7	3	0725	0.379052	-0.00623539
D7	4	0725	0.38881	0.000346698
D7	5	0725	0.395412	0.00377245
D7	6	0725	0.400543	0.00572758
D7	7	0725	0.403938	0.00594735
D7	8	0725	0.403553	0.0023861
D7	9	0725	0.400297	-0.00404559
D7	10	0725	0.403446	-0.00407327
D7	11	0725	0.407223	-0.00347186
D7	12	0725	0.410852	-0.003019
D7	13	0725	0.415046	-0.00200083
D7	14	0725	0.420003	-0.0002193
D7	15	0725	0.423264	-0.000134894
D7	16	0725	0.425876	-0.000697942
D7	17	0725	0.435468	0.00571791
D7	18	0725	0.443564	0.0106373
D7	19	0725	0.46417	0.0280673
D7	20	0725	0.49458	0.0553022
D7	21	0725	0.556067	0.113613
D7	22	0725	0.66793	0.2223
D7	23	0725	0.881569	0.432763
D7	24	0725	1.23501	0.783029
D7	25	0725	1.75775	1.30259
D7	26	0725	2.37978	1.92144
D7	27	0725	2.88402	2.42251
D7	28	0725	3.18284	2.71815
D7	29	0725	3.37614	2.90828
D7	30	0725	3.5169	3.04587
D7	31	0725	3.61088	3.13667
D7	32	0725	3.67993	3.20254
D7	33	0725	3.75002	3.26945
D7	34	0725	3.80303	3.31929
D7	35	0725	3.81024	3.32332
D7	36	0725	3.8461	3.356
D7	37	0725	3.8636	3.37033
D7	38	0725	3.88341	3.38697
D7	39	0725	3.88583	3.38621
D7	40	0725	3.89195	3.38915
D8	1	0725	0.333318	-0.0222075
D8	2	0725	0.344845	-0.013757
D8	3	0725	0.35822	-0.00345835
D8	4	0725	0.365453	0.000698008
D8	5	0725	0.372127	0.00429537
D8	6	0725	0.371986	0.00107828
D8	7	0725	0.372091	-0.00189369
D8	8	0725	0.378018	0.000957539
D8	9	0725	0.378394	-0.00174299
D8	10	0725	0.383043	-0.000170934
D8	11	0725	0.388547	0.00225683
D8	12	0725	0.388891	-0.000475284
D8	13	0725	0.390136	-0.00230725
D8	14	0725	0.396621	0.00110161
D8	15	0725	0.397028	-0.00156849
D8	16	0725	0.400966	-0.000706537
D8	17	0725	0.406685	0.0019359
D8	18	0725	0.412939	0.00511301
D8	19	0725	0.425396	0.0144941
D8	20	0725	0.446566	0.0325877
D8	21	0725	0.484723	0.0676679
D8	22	0725	0.570506	0.150375
D8	23	0725	0.716322	0.293114
D8	24	0725	0.977846	0.551562
D8	25	0725	1.39517	0.96581
D8	26	0725	1.94588	1.51344
D8	27	0725	2.49017	2.05466
D8	28	0725	2.84313	2.40454
D8	29	0725	3.06851	2.62684
D8	30	0725	3.2078	2.76306
D8	31	0725	3.31215	2.86433
D8	32	0725	3.392	2.9411
D8	33	0725	3.4611	3.00713
D8	34	0725	3.5095	3.05245
D8	35	0725	3.55113	3.09101
D8	36	0725	3.56774	3.10454
D8	37	0725	3.58267	3.11639
D8	38	0725	3.62304	3.15369
D8	39	0725	3.61428	3.14185
D8	40	0725	3.63089	3.15538
D9	1	0725	0.343434	-0.0214974
D9	2	0725	0.361018	-0.00710576
D9	3	0725	0.370366	-0.000949146
D9	4	0725	0.375188	0.000681003
D9	5	0725	0.374147	-0.00355266
D9	6	0725	0.378894	-0.00199696
D9	7	0725	0.385414	0.001331
D9	8	0725	0.38916	0.00188483
D9	9	0725	0.393606	0.0031384
D9	10	0725	0.394659	0.000999836
D9	11	0725	0.398923	0.00207122
D9	12	0725	0.402971	0.00292815
D9	13	0725	0.401759	-0.00147602
D9	14	0725	0.403514	-0.00291315
D9	15	0725	0.408435	-0.00118478
D9	16	0725	0.40941	-0.00340095
D9	17	0725	0.418442	0.00243923
D9	18	0725	0.422366	0.00317033
D9	19	0725	0.436676	0.0142892
D9	20	0725	0.464695	0.0391154
D9	21	0725	0.513118	0.0843465
D9	22	0725	0.606969	0.175006
D9	23	0725	0.788312	0.353156
D9	24	0725	1.09678	0.658437
D9	25	0725	1.57173	1.13019
D9	26	0725	2.17075	1.72602
D9	27	0725	2.70736	2.25943
D9	28	0725	3.04655	2.59543
D9	29	0725	3.24662	2.79231
D9	30	0725	3.37953	2.92203
D9	31	0725	3.4997	3.03901
D9	32	0725	3.58926	3.12537
D9	33	0725	3.65127	3.1842
D9	34	0725	3.69155	3.22128
D9	35	0725	3.7256	3.25214
D9	36	0725	3.75653	3.27988
D9	37	0725	3.76527	3.28543
D9	38	0725	3.77917	3.29614
D9	39	0725	3.79327	3.30704
D9	40	0725	3.79028	3.30086
D10	1	0725	0.349244	-0.0184264
D10	2	0725	0.360208	-0.00894407
D10	3	0725	0.371373	0.000739457
D10	4	0725	0.374969	0.002854
D10	5	0725	0.377037	0.00344111
D10	6	0725	0.36847	-0.00660807
D10	7	0725	0.3729	-0.00365948
D10	8	0725	0.374148	-0.00389283
D10	9	0725	0.377769	-0.00175361
D10	10	0725	0.381627	0.000623284
D10	11	0725	0.382971	0.000485992
D10	12	0725	0.385707	0.00174065
D10	13	0725	0.388762	0.00331386
D10	14	0725	0.390486	0.00355604
D10	15	0725	0.391934	0.00352309
D10	16	0725	0.391733	0.0018401
D10	17	0725	0.393001	0.0016275
D10	18	0725	0.389663	-0.00319227
D10	19	0725	0.395017	0.000679711
D10	20	0725	0.393111	-0.00270734
D10	21	0725	0.395097	-0.00220269
D10	22	0725	0.398373	-0.000408497
D10	23	0725	0.400093	-0.000169712
D10	24	0725	0.410586	0.00884186
D10	25	0725	0.425398	0.0221724
D10	26	0725	0.457503	0.0527961
D10	27	0725	0.524552	0.118363
D10	28	0725	0.645506	0.237836
D10	29	0725	0.871239	0.462088
D10	30	0725	1.23844	0.82781
D10	31	0725	1.77005	1.35793
D10	32	0725	2.34965	1.93605
D10	33	0725	2.76665	2.35157
D10	34	0725	2.97737	2.56081
D10	35	0725	3.14863	2.73059
D10	36	0725	3.29902	2.8795
D10	37	0725	3.38909	2.96809
D10	38	0725	3.46316	3.04068
D10	39	0725	3.50681	3.08284
D10	40	0725	3.54494	3.11949
D11	1	0725	0.313696	-0.0169906
D11	2	0725	0.319113	-0.0132023
D11	3	0725	0.335605	0.00166174
D11	4	0725	0.333465	-0.00210602
D11	5	0725	0.337108	-9.03305e-05
D11	6	0725	0.336654	-0.00217285
D11	7	0725	0.338708	-0.00174649
D11	8	0725	0.33889	-0.00319294
D11	9	0725	0.344644	0.00093358
D11	10	0725	0.345991	0.000652431
D11	11	0725	0.350195	0.00322909
D11	12	0725	0.354451	0.00585661
D11	13	0725	0.350873	0.000650242
D11	14	0725	0.351222	-0.000628004
D11	15	0725	0.355372	0.0018937
D11	16	0725	0.357542	0.0024356
D11	17	0725	0.35396	-0.00277375
D11	18	0725	0.35856	0.000197721
D11	19	0725	0.355502	-0.00448785
D11	20	0725	0.359577	-0.00204141
D11	21	0725	0.364656	0.00141007
D11	22	0725	0.365193	0.00031889
D11	23	0725	0.370266	0.00376375
D11	24	0725	0.381561	0.0134309
D11	25	0725	0.402628	0.0328708
D11	26	0725	0.453433	0.0820476
D11	27	0725	0.538775	0.165761
D11	28	0725	0.704632	0.329991
D11	29	0725	0.990638	0.614369
D11	30	0725	1.43298	1.05508
D11	31	0725	1.98383	1.6043
D11	32	0725	2.46991	2.08876
D11	33	0725	2.77914	2.39636
D11	34	0725	2.92386	2.53945
D11	35	0725	3.05487	2.66883
D11	36	0725	3.16846	2.7808
D11	37	0725	3.2502	2.86091
D11	38	0725	3.31306	2.92214
D11	39	0725	3.34788	2.95533
D11	40	0725	3.38371	2.98953
D12	1	0725	0.360899	-0.0201991
D12	2	0725	0.369132	-0.0131322
D12	3	0725	0.378789	-0.00464179
D12	4	0725	0.382435	-0.00216251
D12	5	0725	0.383186	-0.00257795
D12	6	0725	0.387383	0.000453393
D12	7	0725	0.389383	0.00128613
D12	8	0725	0.393047	0.00378395
D12	9	0725	0.393703	0.00327335
D12	10	0725	0.392931	0.00133563
D12	11	0725	0.393433	0.000670949
D12	12	0725	0.394193	0.000264624
D12	13	0725	0.396992	0.00189734
D12	14	0725	0.396833	0.000571766
D12	15	0725	0.398353	0.000925341
D12	16	0725	0.39971	0.00111605
D12	17	0725	0.398388	-0.00137227
D12	18	0725	0.401592	0.000665047
D12	19	0725	0.400908	-0.0011852
D12	20	0725	0.401894	-0.001365
D12	21	0725	0.402904	-0.00152215
D12	22	0725	0.404175	-0.00141671
D12	23	0725	0.413428	0.0066692
D12	24	0725	0.425898	0.0179735
D12	25	0725	0.450463	0.0413718
D12	26	0725	0.500142	0.0898847
D12	27	0725	0.59182	0.180396
D12	28	0725	0.765009	0.352419
D12	29	0725	1.06249	0.648729
D12	30	0725	1.51634	1.10142
D12	31	0725	2.06735	1.65126
D12	32	0725	2.52768	2.11042
D12	33	0725	2.8328	2.41437
D12	34	0725	3.01091	2.59132
D12	35	0725	3.15725	2.73649
D12	36	0725	3.27452	2.8526
D12	37	0725	3.35644	2.93336
D12	38	0725	3.41852	2.99426
D12	39	0725	3.45312	3.0277
D12	40	0725	3.50756	3.08097
E1	1	0230	0.393971	-0.0236735
E1	2	0230	0.404587	-0.0160909
E1	3	0230	0.415462	-0.00825017
E1	4	0230	0.424806	-0.00193939
E1	5	0230	0.428995	-0.000784092
E1	6	0230	0.430263	-0.0025501
E1	7	0230	0.435245	-0.000601404
E1	8	0230	0.439405	0.000524691
E1	9	0230	0.443174	0.0012599
E1	10	0230	0.448572	0.00362473
E1	11	0230	0.451528	0.00354669
E1	12	0230	0.452899	0.00188442
E1	13	0230	0.459697	0.00564877
E1	14	0230	0.462579	0.0054975
E1	15	0230	0.462978	0.00286213
E1	16	0230	0.46657	0.00342085
E1	17	0230	0.468045	0.00186187
E1	18	0230	0.466762	-0.00245468
E1	19	0230	0.47176	-0.000490156
E1	20	0230	0.473418	-0.00186573
E1	21	0230	0.475338	-0.00297951
E1	22	0230	0.476573	-0.00477786
E1	23	0230	0.480555	-0.00382942
E1	24	0230	0.487809	0.000390963
E1	25	0230	0.496187	0.00573436
E1	26	0230	0.521899	0.0284132
E1	27	0230	0.562081	0.0655619
E1	28	0230	0.642159	0.142606
E1	29	0230	0.790107	0.287521
E1	30	0230	1.04725	0.541625
E1	31	0230	1.45689	0.948237
E1	32	0230	1.98931	1.47762
E1	33	0230	2.53418	2.01946
E1	34	0230	2.92741	2.40966
E1	35	0230	3.13643	2.61564
E1	36	0230	3.27515	2.75133
E1	37	0230	3.3944	2.86755
E1	38	0230	3.49182	2.96193
E1	39	0230	3.55592	3.023
E1	40	0230	3.61413	3.07818
E2	1	0230	0.460011	-0.0352764
E2	2	0230	0.474616	-0.024416
E2	3	0230	0.485134	-0.017642
E2	4	0230	0.502286	-0.00423423
E2	5	0230	0.507153	-0.00311082
E2	6	0230	0.511706	-0.00230266
E2	7	0230	0.51841	0.000657764
E2	8	0230	0.526439	0.00494302
E2	9	0230	0.529276	0.00403588
E2	10	0230	0.535344	0.00635966
E2	11	0230	0.539528	0.00679875
E2	12	0230	0.545767	0.00929366
E2	13	0230	0.545683	0.00546577
E2	14	0230	0.548921	0.00495923
E2	15	0230	0.55343	0.00572412
E2	16	0230	0.552556	0.00110593
E2	17	0230	0.55942	0.00422609
E2	18	0230	0.553775	-0.00516333
E2	19	0230	0.562997	0.000314677
E2	20	0230	0.561886	-0.00454068
E2	21	0230	0.564696	-0.00547405
E2	22	0230	0.565629	-0.00828556
E2	23	0230	0.574527	-0.00313121
E2	24	0230	0.577256	-0.00414683
E2	25	0230	0.58797	0.00282296
E2	26	0230	0.607236	0.0183453
E2	27	0230	0.649449	0.0568138
E2	28	0230	0.728888	0.132508
E2	29	0230	0.875027	0.274903
E2	30	0230	1.13391	0.530047
E2	31	0230	1.54161	0.934
E2	32	0230	2.09153	1.48018
E2	33	0230	2.66027	2.04517
[truncated: 1,847 more rows]
