# Supplementary material for: Exploring the plasmodesmata callose-binding protein gene family in upland cotton: unraveling insights for enhancing fiber length
Source: PeerJ. 2024 Jun 26;12:e17625. doi: 10.7717/peerj.17625 (PMC11214431; doi:10.7717/peerj.17625)
Supplement: Supplemental Information 4 [file peerj-12-17625-s004.xls]

## Sheet: Sample Setup
Block Type	96fast
Chemistry	SYBR_GREEN
Experiment File Name	S:\LQW\ZHB\2014-3.eds
Experiment Run End Time	2012-05-24 01:54:34 AM CST
Instrument Type	sds7500fast
Passive Reference	ROX
Well	Sample Name	Sample Color	Biogroup Name	Biogroup Color	Target Name	Target Color	Task	Reporter	Quencher	Quantity	Comments
A1	jing	RGB(132,193,241)			1801	RGB(139,189,249)	UNKNOWN	SYBR	None
A2	jing	RGB(132,193,241)			1801	RGB(139,189,249)	UNKNOWN	SYBR	None
A3	jing	RGB(132,193,241)			1801	RGB(139,189,249)	UNKNOWN	SYBR	None
A4	ye	RGB(168,255,222)			1801	RGB(139,189,249)	UNKNOWN	SYBR	None
A5	ye	RGB(168,255,222)			1801	RGB(139,189,249)	UNKNOWN	SYBR	None
A6	ye	RGB(168,255,222)			1801	RGB(139,189,249)	UNKNOWN	SYBR	None
A7	hua	RGB(223,221,142)			1801	RGB(139,189,249)	UNKNOWN	SYBR	None
A8	hua	RGB(223,221,142)			1801	RGB(139,189,249)	UNKNOWN	SYBR	None
A9	hua	RGB(223,221,142)			1801	RGB(139,189,249)	UNKNOWN	SYBR	None
A10	5	RGB(247,255,168)			1801	RGB(139,189,249)	UNKNOWN	SYBR	None
A11	5	RGB(247,255,168)			1801	RGB(139,189,249)	UNKNOWN	SYBR	None
A12	5	RGB(247,255,168)			1801	RGB(139,189,249)	UNKNOWN	SYBR	None
B1	10	RGB(180,255,0)			1801	RGB(139,189,249)	UNKNOWN	SYBR	None
B2	10	RGB(180,255,0)			1801	RGB(139,189,249)	UNKNOWN	SYBR	None
B3	10	RGB(180,255,0)			1801	RGB(139,189,249)	UNKNOWN	SYBR	None
B4	15	RGB(255,204,153)			1801	RGB(139,189,249)	UNKNOWN	SYBR	None
B5	15	RGB(255,204,153)			1801	RGB(139,189,249)	UNKNOWN	SYBR	None
B6	15	RGB(255,204,153)			1801	RGB(139,189,249)	UNKNOWN	SYBR	None
B7	20	RGB(253,138,88)			1801	RGB(139,189,249)	UNKNOWN	SYBR	None
B8	20	RGB(253,138,88)			1801	RGB(139,189,249)	UNKNOWN	SYBR	None
B9	20	RGB(253,138,88)			1801	RGB(139,189,249)	UNKNOWN	SYBR	None
B10	water	RGB(213,244,165)			1801	RGB(139,189,249)	NTC	SYBR	None
B11	water	RGB(213,244,165)			1801	RGB(139,189,249)	NTC	SYBR	None
B12	water	RGB(213,244,165)			1801	RGB(139,189,249)	NTC	SYBR	None
C1	jing	RGB(132,193,241)			0905	RGB(208,243,98)	UNKNOWN	SYBR	None
C2	jing	RGB(132,193,241)			0905	RGB(208,243,98)	UNKNOWN	SYBR	None
C3	jing	RGB(132,193,241)			0905	RGB(208,243,98)	UNKNOWN	SYBR	None
C4	ye	RGB(168,255,222)			0905	RGB(208,243,98)	UNKNOWN	SYBR	None
C5	ye	RGB(168,255,222)			0905	RGB(208,243,98)	UNKNOWN	SYBR	None
C6	ye	RGB(168,255,222)			0905	RGB(208,243,98)	UNKNOWN	SYBR	None
C7	hua	RGB(223,221,142)			0905	RGB(208,243,98)	UNKNOWN	SYBR	None
C8	hua	RGB(223,221,142)			0905	RGB(208,243,98)	UNKNOWN	SYBR	None
C9	hua	RGB(223,221,142)			0905	RGB(208,243,98)	UNKNOWN	SYBR	None
C10	5	RGB(247,255,168)			0905	RGB(208,243,98)	UNKNOWN	SYBR	None
C11	5	RGB(247,255,168)			0905	RGB(208,243,98)	UNKNOWN	SYBR	None
C12	5	RGB(247,255,168)			0905	RGB(208,243,98)	UNKNOWN	SYBR	None
D1	10	RGB(180,255,0)			0905	RGB(208,243,98)	UNKNOWN	SYBR	None
D2	10	RGB(180,255,0)			0905	RGB(208,243,98)	UNKNOWN	SYBR	None
D3	10	RGB(180,255,0)			0905	RGB(208,243,98)	UNKNOWN	SYBR	None
D4	15	RGB(255,204,153)			0905	RGB(208,243,98)	UNKNOWN	SYBR	None
D5	15	RGB(255,204,153)			0905	RGB(208,243,98)	UNKNOWN	SYBR	None
D6	15	RGB(255,204,153)			0905	RGB(208,243,98)	UNKNOWN	SYBR	None
D7	20	RGB(253,138,88)			0905	RGB(208,243,98)	UNKNOWN	SYBR	None
D8	20	RGB(253,138,88)			0905	RGB(208,243,98)	UNKNOWN	SYBR	None
D9	20	RGB(253,138,88)			0905	RGB(208,243,98)	UNKNOWN	SYBR	None
D10	water	RGB(213,244,165)			0905	RGB(208,243,98)	NTC	SYBR	None
D11	water	RGB(213,244,165)			0905	RGB(208,243,98)	NTC	SYBR	None
D12	water	RGB(213,244,165)			0905	RGB(208,243,98)	NTC	SYBR	None
E1	jing	RGB(132,193,241)			2647	RGB(244,165,230)	UNKNOWN	SYBR	None
E2	jing	RGB(132,193,241)			2647	RGB(244,165,230)	UNKNOWN	SYBR	None
E3	jing	RGB(132,193,241)			2647	RGB(244,165,230)	UNKNOWN	SYBR	None
E4	ye	RGB(168,255,222)			2647	RGB(244,165,230)	UNKNOWN	SYBR	None
E5	ye	RGB(168,255,222)			2647	RGB(244,165,230)	UNKNOWN	SYBR	None
E6	ye	RGB(168,255,222)			2647	RGB(244,165,230)	UNKNOWN	SYBR	None
E7	hua	RGB(223,221,142)			2647	RGB(244,165,230)	UNKNOWN	SYBR	None
E8	hua	RGB(223,221,142)			2647	RGB(244,165,230)	UNKNOWN	SYBR	None
E9	hua	RGB(223,221,142)			2647	RGB(244,165,230)	UNKNOWN	SYBR	None
E10	5	RGB(247,255,168)			2647	RGB(244,165,230)	UNKNOWN	SYBR	None
E11	5	RGB(247,255,168)			2647	RGB(244,165,230)	UNKNOWN	SYBR	None
E12	5	RGB(247,255,168)			2647	RGB(244,165,230)	UNKNOWN	SYBR	None
F1	10	RGB(180,255,0)			2647	RGB(244,165,230)	UNKNOWN	SYBR	None
F2	10	RGB(180,255,0)			2647	RGB(244,165,230)	UNKNOWN	SYBR	None
F3	10	RGB(180,255,0)			2647	RGB(244,165,230)	UNKNOWN	SYBR	None
F4					2647	RGB(244,165,230)	UNKNOWN	SYBR	None
F5					2647	RGB(244,165,230)	UNKNOWN	SYBR	None
F6					2647	RGB(244,165,230)	UNKNOWN	SYBR	None
F7	20	RGB(253,138,88)			2647	RGB(244,165,230)	UNKNOWN	SYBR	None
F8	20	RGB(253,138,88)			2647	RGB(244,165,230)	UNKNOWN	SYBR	None
F9	20	RGB(253,138,88)			2647	RGB(244,165,230)	UNKNOWN	SYBR	None
F10	water	RGB(213,244,165)			2647	RGB(244,165,230)	NTC	SYBR	None
F11	water	RGB(213,244,165)			2647	RGB(244,165,230)	NTC	SYBR	None
F12	water	RGB(213,244,165)			2647	RGB(244,165,230)	NTC	SYBR	None
G1	jing	RGB(132,193,241)			Actin	RGB(255,191,168)	UNKNOWN	SYBR	None
G2	jing	RGB(132,193,241)			Actin	RGB(255,191,168)	UNKNOWN	SYBR	None
G3	jing	RGB(132,193,241)			Actin	RGB(255,191,168)	UNKNOWN	SYBR	None
G4	ye	RGB(168,255,222)			Actin	RGB(255,191,168)	UNKNOWN	SYBR	None
G5	ye	RGB(168,255,222)			Actin	RGB(255,191,168)	UNKNOWN	SYBR	None
G6	ye	RGB(168,255,222)			Actin	RGB(255,191,168)	UNKNOWN	SYBR	None
G7	hua	RGB(223,221,142)			Actin	RGB(255,191,168)	UNKNOWN	SYBR	None
G8	hua	RGB(223,221,142)			Actin	RGB(255,191,168)	UNKNOWN	SYBR	None
G9	hua	RGB(223,221,142)			Actin	RGB(255,191,168)	UNKNOWN	SYBR	None
G10	5	RGB(247,255,168)			Actin	RGB(255,191,168)	UNKNOWN	SYBR	None
G11	5	RGB(247,255,168)			Actin	RGB(255,191,168)	UNKNOWN	SYBR	None
G12	5	RGB(247,255,168)			Actin	RGB(255,191,168)	UNKNOWN	SYBR	None
H1	10	RGB(180,255,0)			Actin	RGB(255,191,168)	UNKNOWN	SYBR	None
H2	10	RGB(180,255,0)			Actin	RGB(255,191,168)	UNKNOWN	SYBR	None
H3	10	RGB(180,255,0)			Actin	RGB(255,191,168)	UNKNOWN	SYBR	None
H4	15	RGB(255,204,153)			Actin	RGB(255,191,168)	UNKNOWN	SYBR	None
H5	15	RGB(255,204,153)			Actin	RGB(255,191,168)	UNKNOWN	SYBR	None
H6	15	RGB(255,204,153)			Actin	RGB(255,191,168)	UNKNOWN	SYBR	None
H7	20	RGB(253,138,88)			Actin	RGB(255,191,168)	UNKNOWN	SYBR	None
H8	20	RGB(253,138,88)			Actin	RGB(255,191,168)	UNKNOWN	SYBR	None
H9	20	RGB(253,138,88)			Actin	RGB(255,191,168)	UNKNOWN	SYBR	None
H10	water	RGB(213,244,165)			Actin	RGB(255,191,168)	NTC	SYBR	None
H11	water	RGB(213,244,165)			Actin	RGB(255,191,168)	NTC	SYBR	None
H12	water	RGB(213,244,165)			Actin	RGB(255,191,168)	NTC	SYBR	None

## Sheet: Results
Block Type	96fast
Chemistry	SYBR_GREEN
Experiment File Name	S:\LQW\ZHB\2014-3.eds
Experiment Run End Time	2012-05-24 01:54:34 AM CST
Instrument Type	sds7500fast
Passive Reference	ROX
Well	Sample Name	Target Name	Task	Reporter	Quencher	Cт	Cт Mean	Cт SD	Quantity	Quantity Mean	Quantity SD	Automatic Ct Threshold	Ct Threshold	Automatic Baseline	Baseline Start	Baseline End	Tm1	Tm2	Tm3	Comments	AMPNC	HIGHSD	OUTLIERRG	MTP
A1	jing	1801	UNKNOWN	SYBR	None	24.8772	24.6675	0.22936				TRUE	0.252068	TRUE	3	19	85.3378				N	N	N	N
A2	jing	1801	UNKNOWN	SYBR	None	24.7028	24.6675	0.22936				TRUE	0.252068	TRUE	3	19	85.3378				N	N	N	N
A3	jing	1801	UNKNOWN	SYBR	None	24.4226	24.6675	0.22936				TRUE	0.252068	TRUE	3	18	85.5162				N	N	N	N
A4	ye	1801	UNKNOWN	SYBR	None	29.8683	29.8324	0.0887494				TRUE	0.252068	TRUE	3	24	85.5162				N	N	N	N
A5	ye	1801	UNKNOWN	SYBR	None	29.7314	29.8324	0.0887494				TRUE	0.252068	TRUE	3	25	85.6946				N	N	N	N
A6	ye	1801	UNKNOWN	SYBR	None	29.8976	29.8324	0.0887494				TRUE	0.252068	TRUE	3	25	85.873				N	N	N	N
A7	hua	1801	UNKNOWN	SYBR	None	32.3009	32.1395	0.388592				TRUE	0.252068	TRUE	3	27	85.873	75.3486			N	N	N	Y
A8	hua	1801	UNKNOWN	SYBR	None	32.4215	32.1395	0.388592				TRUE	0.252068	TRUE	3	27	85.873				N	N	N	N
A9	hua	1801	UNKNOWN	SYBR	None	31.6963	32.1395	0.388592				TRUE	0.252068	TRUE	3	27	85.6946				N	N	N	N
A10	5	1801	UNKNOWN	SYBR	None	25.2545	25.3976	0.126688				TRUE	0.252068	TRUE	3	20	85.6946				N	N	N	N
A11	5	1801	UNKNOWN	SYBR	None	25.443	25.3976	0.126688				TRUE	0.252068	TRUE	3	19	85.6946				N	N	N	N
A12	5	1801	UNKNOWN	SYBR	None	25.4954	25.3976	0.126688				TRUE	0.252068	TRUE	3	20	85.5162				N	N	N	N
B1	10	1801	UNKNOWN	SYBR	None	26.938	26.7888	0.25529				TRUE	0.252068	TRUE	3	21	85.3378				N	N	N	N
B2	10	1801	UNKNOWN	SYBR	None	26.9344	26.7888	0.25529				TRUE	0.252068	TRUE	3	21	85.6946				N	N	N	N
B3	10	1801	UNKNOWN	SYBR	None	26.494	26.7888	0.25529				TRUE	0.252068	TRUE	3	21	85.873				N	N	Y	N
B4	15	1801	UNKNOWN	SYBR	None	29.3574	29.427	0.115358				TRUE	0.252068	TRUE	3	24	85.873				N	N	N	N
B5	15	1801	UNKNOWN	SYBR	None	29.3634	29.427	0.115358				TRUE	0.252068	TRUE	3	23	86.0514				N	N	N	N
B6	15	1801	UNKNOWN	SYBR	None	29.5602	29.427	0.115358				TRUE	0.252068	TRUE	3	24	86.0514				N	N	N	N
B7	20	1801	UNKNOWN	SYBR	None	31.8007	31.9364	1.03489				TRUE	0.252068	TRUE	3	27	86.0514	76.0622			N	Y	N	Y
B8	20	1801	UNKNOWN	SYBR	None	33.0325	31.9364	1.03489				TRUE	0.252068	TRUE	3	27	86.0514	75.7054			N	Y	N	Y
B9	20	1801	UNKNOWN	SYBR	None	30.9761	31.9364	1.03489				TRUE	0.252068	TRUE	3	26	85.873	75.8838			N	Y	N	Y
B10	water	1801	NTC	SYBR	None	32.0892	32.1568	0.194851				TRUE	0.252068	TRUE	3	27	85.873				Y	N	N	N
B11	water	1801	NTC	SYBR	None	32.0048	32.1568	0.194851				TRUE	0.252068	TRUE	3	26	85.6946				Y	N	N	N
B12	water	1801	NTC	SYBR	None	32.3765	32.1568	0.194851				TRUE	0.252068	TRUE	3	27	85.5162				Y	N	N	N
C1	jing	0905	UNKNOWN	SYBR	None	23.1028	23.0633	0.0539735				TRUE	0.422204	TRUE	3	16	80.5216				N	N	N	N
C2	jing	0905	UNKNOWN	SYBR	None	23.0855	23.0633	0.0539735				TRUE	0.422204	TRUE	3	17	80.8784				N	N	N	N
C3	jing	0905	UNKNOWN	SYBR	None	23.0018	23.0633	0.0539735				TRUE	0.422204	TRUE	3	17	81.0568				N	N	N	N
C4	ye	0905	UNKNOWN	SYBR	None	26.1493	26.466	0.274232				TRUE	0.422204	TRUE	3	20	81.0568				N	N	Y	N
C5	ye	0905	UNKNOWN	SYBR	None	26.6203	26.466	0.274232				TRUE	0.422204	TRUE	3	20	81.2351				N	N	N	N
C6	ye	0905	UNKNOWN	SYBR	None	26.6282	26.466	0.274232				TRUE	0.422204	TRUE	3	20	81.2351				N	N	N	N
C7	hua	0905	UNKNOWN	SYBR	None	25.4267	25.363	0.11192				TRUE	0.422204	TRUE	3	19	81.4135				N	N	N	N
C8	hua	0905	UNKNOWN	SYBR	None	25.2337	25.363	0.11192				TRUE	0.422204	TRUE	3	19	81.4135				N	N	N	N
C9	hua	0905	UNKNOWN	SYBR	None	25.4285	25.363	0.11192				TRUE	0.422204	TRUE	3	19	81.2351				N	N	N	N
C10	5	0905	UNKNOWN	SYBR	None	24.6566	24.892	0.220512				TRUE	0.422204	TRUE	3	18	81.0568				N	N	N	N
C11	5	0905	UNKNOWN	SYBR	None	25.0937	24.892	0.220512				TRUE	0.422204	TRUE	3	18	80.8784				N	N	N	N
C12	5	0905	UNKNOWN	SYBR	None	24.9257	24.892	0.220512				TRUE	0.422204	TRUE	3	19	80.7				N	N	N	N
D1	10	0905	UNKNOWN	SYBR	None	25.7262	25.1804	0.473583				TRUE	0.422204	TRUE	3	19	80.5216				N	N	N	N
D2	10	0905	UNKNOWN	SYBR	None	24.8788	25.1804	0.473583				TRUE	0.422204	TRUE	3	18	80.8784				N	N	N	N
D3	10	0905	UNKNOWN	SYBR	None	24.936	25.1804	0.473583				TRUE	0.422204	TRUE	3	19	81.0568				N	N	N	N
D4	15	0905	UNKNOWN	SYBR	None	24.6295	24.5523	0.113226				TRUE	0.422204	TRUE	3	18	81.2351				N	N	N	N
D5	15	0905	UNKNOWN	SYBR	None	24.6051	24.5523	0.113226				TRUE	0.422204	TRUE	3	19	81.4135				N	N	N	N
D6	15	0905	UNKNOWN	SYBR	None	24.4223	24.5523	0.113226				TRUE	0.422204	TRUE	3	18	81.5919				N	N	N	N
D7	20	0905	UNKNOWN	SYBR	None	25.6286	25.5689	0.0527241				TRUE	0.422204	TRUE	3	19	81.5919				N	N	N	N
D8	20	0905	UNKNOWN	SYBR	None	25.5493	25.5689	0.0527241				TRUE	0.422204	TRUE	3	19	81.5919				N	N	N	N
D9	20	0905	UNKNOWN	SYBR	None	25.5288	25.5689	0.0527241				TRUE	0.422204	TRUE	3	19	81.4135				N	N	N	N
D10	water	0905	NTC	SYBR	None	34.5168	34.5805	0.134939				TRUE	0.422204	TRUE	3	28	80.8784				Y	N	N	N
D11	water	0905	NTC	SYBR	None	34.4892	34.5805	0.134939				TRUE	0.422204	TRUE	3	28	80.7				Y	N	N	N
D12	water	0905	NTC	SYBR	None	34.7355	34.5805	0.134939				TRUE	0.422204	TRUE	3	28	80.5216				Y	N	N	N
E1	jing	2647	UNKNOWN	SYBR	None	29.7969	29.2982	0.744703				TRUE	0.359089	TRUE	3	24	84.6243	74.9919			N	Y	N	Y
E2	jing	2647	UNKNOWN	SYBR	None	29.6554	29.2982	0.744703				TRUE	0.359089	TRUE	3	24	84.8027	75.3486			N	Y	N	Y
E3	jing	2647	UNKNOWN	SYBR	None	28.4421	29.2982	0.744703				TRUE	0.359089	TRUE	3	22	76.2405	84.8027			N	Y	N	Y
E4	ye	2647	UNKNOWN	SYBR	None	29.5304	29.5364	0.00535206				TRUE	0.359089	TRUE	3	24	84.9811	76.2405			N	N	N	Y
E5	ye	2647	UNKNOWN	SYBR	None	29.5407	29.5364	0.00535206				TRUE	0.359089	TRUE	3	24	85.1595	75.7054			N	N	N	Y
E6	ye	2647	UNKNOWN	SYBR	None	29.5381	29.5364	0.00535206				TRUE	0.359089	TRUE	3	24	85.3378	76.0622			N	N	N	Y
E7	hua	2647	UNKNOWN	SYBR	None	28.6309	25.9418	4.94623				TRUE	0.359089	TRUE	3	23	85.3378	76.4189			N	Y	N	Y
E8	hua	2647	UNKNOWN	SYBR	None	28.9609	25.9418	4.94623				TRUE	0.359089	TRUE	3	23	76.0622	85.3378			N	Y	N	Y
E9	hua	2647	UNKNOWN	SYBR	None	20.2335	25.9418	4.94623				TRUE	0.359089	TRUE	3	14	75.8838				N	Y	N	N
E10	5	2647	UNKNOWN	SYBR	None	26.5309	26.6916	1.12314				TRUE	0.359089	TRUE	3	20	76.0622	84.9811			N	Y	N	Y
E11	5	2647	UNKNOWN	SYBR	None	27.8865	26.6916	1.12314				TRUE	0.359089	TRUE	3	22	75.7054	84.6243			N	Y	N	Y
E12	5	2647	UNKNOWN	SYBR	None	25.6575	26.6916	1.12314				TRUE	0.359089	TRUE	3	19	76.0622	84.4459			N	Y	N	Y
F1	10	2647	UNKNOWN	SYBR	None	27.9007	28.4444	0.664368				TRUE	0.359089	TRUE	3	22	84.4459	74.9919			N	Y	N	Y
F2	10	2647	UNKNOWN	SYBR	None	28.2476	28.4444	0.664368				TRUE	0.359089	TRUE	3	22	84.6243	75.527			N	Y	N	Y
F3	10	2647	UNKNOWN	SYBR	None	29.185	28.4444	0.664368				TRUE	0.359089	TRUE	3	23	84.9811	75.7054			N	Y	N	Y
F4	15	2647	UNKNOWN	SYBR	None	25.2399	26.2064	0.838447				TRUE	0.359089	TRUE	3	20	76.5973	84.8027			N	Y	N	Y
F5	15	2647	UNKNOWN	SYBR	None	26.6411	26.2064	0.838447				TRUE	0.359089	TRUE	3	21	76.2405	84.9811			N	Y	N	Y
F6	15	2647	UNKNOWN	SYBR	None	26.7382	26.2064	0.838447				TRUE	0.359089	TRUE	3	21	75.7054	85.1595			N	Y	N	Y
F7	20	2647	UNKNOWN	SYBR	None	26.9958	27.1246	0.815631				TRUE	0.359089	TRUE	3	21	76.0622	85.1595			N	Y	N	Y
F8	20	2647	UNKNOWN	SYBR	None	27.997	27.1246	0.815631				TRUE	0.359089	TRUE	3	22	85.1595	76.0622			N	Y	N	Y
F9	20	2647	UNKNOWN	SYBR	None	26.3811	27.1246	0.815631				TRUE	0.359089	TRUE	3	20	76.0622	84.9811			N	Y	N	Y
F10	water	2647	NTC	SYBR	None	28.9551	28.9399	1.79754				TRUE	0.359089	TRUE	3	23	76.5973				Y	Y	N	N
F11	water	2647	NTC	SYBR	None	30.7298	28.9399	1.79754				TRUE	0.359089	TRUE	3	25	76.5973				Y	Y	N	N
F12	water	2647	NTC	SYBR	None	27.1348	28.9399	1.79754				TRUE	0.359089	TRUE	3	22	76.5973				Y	Y	N	N
G1	jing	Actin	UNKNOWN	SYBR	None	20.9522	20.8479	0.139767				TRUE	0.266487	TRUE	3	15	85.6946				N	N	N	N
G2	jing	Actin	UNKNOWN	SYBR	None	20.9023	20.8479	0.139767				TRUE	0.266487	TRUE	3	16	85.873				N	N	N	N
G3	jing	Actin	UNKNOWN	SYBR	None	20.6891	20.8479	0.139767				TRUE	0.266487	TRUE	3	14	86.0514				N	N	N	N
G4	ye	Actin	UNKNOWN	SYBR	None	23.3285	23.313	0.190311				TRUE	0.266487	TRUE	3	18	86.0514				N	N	N	N
G5	ye	Actin	UNKNOWN	SYBR	None	23.1155	23.313	0.190311				TRUE	0.266487	TRUE	3	18	86.4081				N	N	N	N
G6	ye	Actin	UNKNOWN	SYBR	None	23.4951	23.313	0.190311				TRUE	0.266487	TRUE	3	18	86.4081				N	N	N	N
G7	hua	Actin	UNKNOWN	SYBR	None	21.6543	21.5679	0.0968714				TRUE	0.266487	TRUE	3	16	86.2297				N	N	N	N
G8	hua	Actin	UNKNOWN	SYBR	None	21.4631	21.5679	0.0968714				TRUE	0.266487	TRUE	3	16	86.2297				N	N	N	N
G9	hua	Actin	UNKNOWN	SYBR	None	21.5862	21.5679	0.0968714				TRUE	0.266487	TRUE	3	16	86.0514				N	N	N	N
G10	5	Actin	UNKNOWN	SYBR	None	18.9518	19.1205	0.261513				TRUE	0.266487	TRUE	3	14	85.1595				N	N	N	N
G11	5	Actin	UNKNOWN	SYBR	None	18.9879	19.1205	0.261513				TRUE	0.266487	TRUE	3	13	85.1595				N	N	N	N
G12	5	Actin	UNKNOWN	SYBR	None	19.4217	19.1205	0.261513				TRUE	0.266487	TRUE	3	13	84.9811				N	N	N	N
H1	10	Actin	UNKNOWN	SYBR	None	18.5279	18.3057	0.196144				TRUE	0.266487	TRUE	3	13	84.4459				N	N	N	N
H2	10	Actin	UNKNOWN	SYBR	None	18.2324	18.3057	0.196144				TRUE	0.266487	TRUE	3	13	84.6243				N	N	N	N
H3	10	Actin	UNKNOWN	SYBR	None	18.1567	18.3057	0.196144				TRUE	0.266487	TRUE	3	12	84.6243				N	N	N	N
H4	15	Actin	UNKNOWN	SYBR	None	19.8553	19.2903	0.587998				TRUE	0.266487	TRUE	3	14	85.5162				N	Y	N	N
H5	15	Actin	UNKNOWN	SYBR	None	18.6817	19.2903	0.587998				TRUE	0.266487	TRUE	3	13	85.5162				N	Y	N	N
H6	15	Actin	UNKNOWN	SYBR	None	19.3337	19.2903	0.587998				TRUE	0.266487	TRUE	3	13	85.1595				N	Y	N	N
H7	20	Actin	UNKNOWN	SYBR	None	20.7731	20.8056	0.0358045				TRUE	0.266487	TRUE	3	15	85.873				N	N	N	N
H8	20	Actin	UNKNOWN	SYBR	None	20.7999	20.8056	0.0358045				TRUE	0.266487	TRUE	3	15	85.873				N	N	N	N
H9	20	Actin	UNKNOWN	SYBR	None	20.844	20.8056	0.0358045				TRUE	0.266487	TRUE	3	16	85.6946				N	N	N	N
H10	water	Actin	NTC	SYBR	None	25.2612	25.164	0.100343				TRUE	0.266487	TRUE	3	20	86.0514				Y	N	N	N
H11	water	Actin	NTC	SYBR	None	25.0608	25.164	0.100343				TRUE	0.266487	TRUE	3	20	85.873				Y	N	N	N
H12	water	Actin	NTC	SYBR	None	25.1702	25.164	0.100343				TRUE	0.266487	TRUE	3	19	85.873				Y	N	N	N

## Sheet: Raw Data
Block Type	96fast
Chemistry	SYBR_GREEN
Experiment File Name	S:\LQW\ZHB\2014-3.eds
Experiment Run End Time	2012-05-24 01:54:34 AM CST
Instrument Type	sds7500fast
Passive Reference	ROX
Well	Cycle	1	2	3	4	5
A1	1	107860	18760.4	71967.7	335496	786.919
A2	1	93037.6	17240.5	76300.3	315486	820.678
A3	1	94296.4	16373.2	77971	298936	633.018
A4	1	94845.1	17684.8	83317.8	305137	16.2806
A5	1	89721	15482.4	78934.3	281507	226.796
A6	1	66508.5	13921.1	80838.1	284851	0
A7	1	84318	17286.3	87239.5	297111	656.118
A8	1	94869.3	16705.5	85329.9	305724	348.863
A9	1	97727.5	18087.8	86866.3	322818	93.2595
A10	1	92275.9	15679.7	78965.6	302111	202.575
A11	1	97645.6	18736.5	85114.7	350328	292.716
A12	1	99541.2	16661.3	71942.2	351585	510.88
B1	1	92721.8	15283.4	64052.2	275175	1702.38
B2	1	105270	17307.6	85238.2	334849	104.917
B3	1	118814	20577.2	90637	319787	445.368
B4	1	98155.2	18673.1	99220.2	339262	61.8747
B5	1	95358.2	17144.4	98102.2	329364	0
B6	1	79375.4	14544.9	86215.6	290017	0
B7	1	84755	15044.6	87303.9	294478	0
B8	1	89323.6	14866.4	87859	301697	0
B9	1	85540.2	15358	83545.7	299472	359.299
B10	1	79182.9	13345.4	75663.1	276226	0
B11	1	98598.3	15850.9	84059.5	347700	0
B12	1	78968.7	14883.3	75691.9	335378	0
C1	1	43339.9	12381.8	68112.6	291704	0
C2	1	101868	18402.3	83932.4	322665	602.724
C3	1	88954.9	18377.5	97011.9	344780	440.54
C4	1	102613	18717.6	92896.8	302480	337.125
C5	1	90205.2	17015.8	89734.5	290061	177.575
C6	1	83918.9	15834.4	85318	271576	0
C7	1	86550	15675.6	81164.2	258951	0
C8	1	97500.8	18026.7	94188.1	304159	0
C9	1	92055.5	16921.4	86480.3	288221	0
C10	1	95685.7	16630.5	85238.3	297245	306.382
C11	1	99554.9	17396.4	89343.5	350786	0
C12	1	111781	19466.7	87142.2	382683	2461.7
D1	1	87464.8	15473.7	65750.4	265266	1812.39
D2	1	83023.3	15459.9	77603.9	297431	1057.01
D3	1	101434	17889.8	87673.5	306476	309.969
D4	1	92517.3	16749.8	91146.4	306848	104.381
D5	1	82157.9	15443.3	83593.4	266925	0
D6	1	85469.7	14958.5	84941.6	271567	0
D7	1	69479.8	12897.9	74995.3	239640	0
D8	1	91432	16918.8	92672.3	301912	0
D9	1	85764.6	16088.1	88466.9	302050	0
D10	1	87191.2	16739.6	89149.1	323521	593.547
D11	1	82890.6	14723.1	81104.6	323872	0
D12	1	117359	18087.2	81203.3	343042	486.349
E1	1	100737	21385.7	93018.6	358975	813.93
E2	1	113223	19345.2	89048.4	334847	335.007
E3	1	89470.6	16956.8	92228.6	324088	230.852
E4	1	100361	16932	93865	307726	106.636
E5	1	95066.8	17109.2	97619.7	308331	0
E6	1	109044	19416.7	103294	321749	238.502
E7	1	111064	19289.7	107567	322685	0
E8	1	97372.7	18675.2	102829	322699	0
E9	1	103824	19541.3	103813	345625	898.514
E10	1	86939.9	15856.7	85612.2	311989	0
E11	1	97241.8	15751.3	82416.1	321218	211.362
E12	1	77239.8	5657.62	67337.8	338447	0
F1	1	99805.8	17745.3	84428.2	358776	0
F2	1	96966.8	17096.5	84485.3	323342	337.93
F3	1	105562	18980.3	94341.2	330609	1094.9
F4	1	88019.9	16063.8	86226.6	287683	595.922
F5	1	106100	17829.9	96376.5	313325	0
F6	1	106306	18663.3	107191	347949	0
F7	1	102756	18132.2	104324	339785	0
F8	1	110558	19754.5	108508	354697	511.433
F9	1	99844.4	18294.4	103132	354603	0
F10	1	88060.8	16406.5	91945.9	335206	0
F11	1	82497.5	14415.1	72922.3	286712	0
F12	1	84091.4	15079.5	75875.3	334541	0
G1	1	89050.3	19238.9	78148.9	345984	0
G2	1	122912	22530.1	83722.7	332592	2783.18
G3	1	107598	19475.3	85314.3	319998	290.743
G4	1	104857	19232.8	87518.5	308709	309.704
G5	1	120096	20945.1	94279	319786	969.91
G6	1	122939	22071.3	101152	340710	106.779
G7	1	130239	23224.3	103802	349763	0
G8	1	135822	23695.1	105631	358356	0
G9	1	125957	21583.8	92989.9	327968	0
G10	1	125935	20771.2	84463.8	319528	192.001
G11	1	129219	21749.7	85023.1	348438	0
G12	1	109359	18279.7	65022.2	291502	801.671
H1	1	101223	17776.9	63543.8	291742	517.749
H2	1	109676	19636.3	76503.6	324163	625.492
H3	1	103928	19566.1	82662.9	324619	0
H4	1	116574	20682.7	88047.7	331048	3053.92
H5	1	118080	20281.1	84466.5	304019	0
H6	1	135922	22961.8	99552.7	354408	717.501
H7	1	126814	20212.3	81682.8	307045	0
H8	1	129990	21939.9	94032.3	340518	263.384
H9	1	122801	20728.9	87753.7	333849	0
H10	1	127256	20911.1	83183	325032	452.412
H11	1	141023	23456.9	86751.7	375311	0
H12	1	164516	26404.3	77112.4	356049	1921.25
A1	2	110706	19190.4	71318.2	333085	1243.6
A2	2	96262.2	17419.7	76411.2	312664	1132.01
A3	2	96735.5	16774.1	77705.8	296196	645.957
A4	2	96591.1	17816.1	82841	302497	3.83073
A5	2	90527.9	15705.2	78573.8	278890	61.1285
A6	2	68360.6	14146.9	80302.2	282599	0
A7	2	86357	18056.8	87069.9	293787	435.755
A8	2	96613.3	17251.3	85724.1	305119	868.652
A9	2	108215	20925.6	87972.4	318825	124.684
A10	2	92801.1	15825.5	78579.7	299110	235.345
A11	2	99631.6	18297.7	84458.6	347570	333.371
A12	2	101105	16871.2	71633.5	348873	678.95
B1	2	93705.9	15360.4	63372.2	270486	24.8522
B2	2	108072	17391.3	84823.4	334590	266.954
B3	2	123461	21043.7	90236.1	317745	554.629
B4	2	101937	19011.1	99067.2	337454	41.5879
B5	2	98335.8	17475.4	97603.9	327183	0
B6	2	82021.9	14692.9	86311.2	288246	0
B7	2	85618.8	15081.1	86525	291232	0
B8	2	90876.4	14948.5	87918.1	300569	0
B9	2	86374.5	15362.1	82741	295705	530.395
B10	2	79807.8	13508.5	74425.4	271067	0
B11	2	100429	16388.3	83548.6	345832	0
B12	2	79748.4	14794.7	73514.1	325151	0
C1	2	44466	12714.6	67787.5	289916	46.3086
C2	2	103924	18409.6	83620.9	320479	1039.14
C3	2	91490.4	18765.5	96821.4	342504	573.186
C4	2	104806	18896.4	92749.6	302976	259.251
C5	2	91834.3	17372	90090.8	289750	538.332
C6	2	84326.5	16127.4	84067	267079	0
C7	2	87901.9	15701.4	80603.3	257486	0
C8	2	99643.9	18444.3	93916.4	303742	0
C9	2	92667.2	16858.2	86616.3	286730	0
C10	2	98956.2	16842	84907.9	296030	0
C11	2	100664	17629.4	89305.5	349637	138.539
C12	2	113116	19351.2	86084.9	380362	3124.97
D1	2	88900.3	15463.9	65167.7	262789	1962.03
D2	2	84503.8	15531.6	76765	294273	628.055
D3	2	103262	18257.6	87032.4	303951	597.863
D4	2	95016.4	17124.6	90598.3	304337	0
D5	2	83904.3	15401.5	83628.8	267630	0
D6	2	87460	15308.1	84459.8	270191	0
D7	2	71135.5	12974.7	75519.9	240473	1016.31
D8	2	94063.9	17014.8	92403	302361	0
D9	2	85618.2	15560	87134.7	296776	0
D10	2	87168.8	16286.2	87936.7	319128	52.2101
D11	2	85575.2	14805.2	80812.6	322561	0
D12	2	118000	18243	80149.2	338471	294.12
E1	2	105317	21216.9	92791.7	357504	909.854
E2	2	116268	19091.8	89134.6	333336	708.422
E3	2	93057.8	17379	91994.5	322074	171.215
E4	2	103174	17674.7	93996.8	307625	484.432
E5	2	97845.4	17248.1	97615.7	307018	0
E6	2	110274	19213.6	103779	322552	0
E7	2	114333	19201.7	107602	321501	112.48
E8	2	99265.3	19063.8	102186	320686	0
E9	2	104142	19778.4	103027	343540	4960.37
E10	2	87353.7	15912	84161.6	306196	0
E11	2	97930.2	16231.4	82211.4	319575	98.7772
E12	2	78621	5963.79	65634.6	330663	0
F1	2	102451	18039.5	84514	357055	624.713
F2	2	98901.9	17353.2	83009.9	317684	751.583
F3	2	108762	19170.3	93725.5	327578	781.653
F4	2	87970.3	16325.2	86023.9	286161	453.057
F5	2	107931	17781.5	96114.1	311988	279.063
F6	2	108043	18998	106660	345924	0
F7	2	105557	18179.6	103696	337298	0
F8	2	111718	19509.7	107882	353607	1093.78
F9	2	100601	18280.4	102576	352475	0
F10	2	89232.3	16124.4	90145.4	328718	0
F11	2	83527.8	14142.2	72111.6	282769	0
F12	2	85569.8	15429.4	75840	333331	0
G1	2	90357	19031.9	77956.1	341758	0
G2	2	127191	23252.5	82848.3	329136	3144.89
G3	2	109549	19721.7	84359.9	315341	0
G4	2	112321	20096	88736	311493	303.456
G5	2	122138	21135	93696.9	316091	285.534
G6	2	125529	22211.5	100778	337428	0
G7	2	132375	23210.8	103494	347935	0
G8	2	138456	23939.1	104497	355422	219.764
G9	2	127626	21536.5	92072.8	324531	0
G10	2	127024	20699.1	83585.7	315331	0
G11	2	129598	22113	85135.1	347012	1156.68
G12	2	109016	18295.1	63994.7	287179	982.907
H1	2	101934	18089.4	63150.3	288796	564.559
H2	2	111281	19960.6	76199.4	322076	787.45
H3	2	105604	19393	81680.9	321468	0
H4	2	116993	20265.7	87310	327690	2526.72
H5	2	120114	20439.9	83857.5	300749	0
H6	2	135977	23275.2	98479.1	350826	482.115
H7	2	126755	20005.6	81082	304230	0
H8	2	129708	22095.1	92599.3	333390	191.224
H9	2	122329	20278.5	86635.6	327906	0
H10	2	127779	20846.4	83173.9	324438	929.521
H11	2	140992	23254	86063	372876	0
H12	2	163793	25983.3	75612.5	349580	1983.72
A1	3	111120	18966.3	70472.4	328229	667.914
A2	3	98519.9	17560.2	75740.3	309984	1112.55
A3	3	97588.7	16530.8	77223.3	294242	570.314
A4	3	98411.3	17806.7	82765.8	300429	0
A5	3	92138.9	15795.1	78401	277542	0
A6	3	70549.5	14001	79813.3	280698	0
A7	3	88462.4	18754.8	87192.6	292655	262.613
A8	3	98735.6	17060.9	85546.4	303218	659.159
A9	3	117539	24757.8	89672.2	315248	0
A10	3	95853.7	15917.2	77912.9	295509	0
A11	3	100505	18716	83863.3	343294	0
A12	3	100560	16848.2	70585.9	345173	937.725
B1	3	93922.8	14884.2	62310.5	266490	0
B2	3	108744	17360.2	83745.2	329463	723.925
B3	3	123772	20904.2	89379.6	314400	416.232
B4	3	103228	18739.9	97617.1	333332	61.8747
B5	3	101265	17316.8	97629.6	325785	0
B6	3	82417.2	14613.4	85184.5	285315	0
B7	3	85203.2	15008	85729.8	287305	0
B8	3	92622.4	15228.5	87957.5	298469	0
B9	3	86882.4	15065.7	81768.8	292925	258.353
B10	3	80326.7	13477.5	73791.2	269011	0
B11	3	99848.7	16239	82726.1	341176	0
B12	3	80762.4	14753.3	72656.3	319826	0
C1	3	45951.3	12531.8	67443.6	286868	0
C2	3	103936	18354.7	82473.3	315779	376.955
C3	3	94193.2	18769.4	95984.6	337998	816.209
C4	3	105951	19103.1	92712	300545	705.795
C5	3	92881.2	17503.8	89555	288373	773.853
C6	3	86628.3	16191.5	83124.9	263867	0
C7	3	88618.6	15571.4	79413.2	253610	0
C8	3	100145	18499.7	93312.7	299914	57.0131
C9	3	93858.3	17144.2	86118.6	283855	29.0609
C10	3	99677.6	16342.9	84796.1	295900	393.92
C11	3	102744	17450.1	88053.7	346306	241.612
C12	3	114000	19552.1	85086.6	375992	1961.91
D1	3	89518.7	15504.5	64194.2	258385	1857.44
D2	3	84509.8	15578.4	75747	289304	546.024
D3	3	104917	17964.8	85969.4	300380	343.081
D4	3	95395.9	17079.5	89594.2	299290	476.057
D5	3	85932.8	15580.5	82638.6	263772	0
D6	3	88136.8	15195.9	83532.2	266457	0
D7	3	72735.1	13118.5	75445.6	239378	0
D8	3	94302.3	16640.5	92014.9	298567	0
D9	3	88228	15708.7	86674.8	293291	0
D10	3	87930.5	16223.5	86982.8	314484	0
D11	3	86245.3	14821.4	80356.9	320251	0
D12	3	117646	17237.5	78607.2	332544	0
E1	3	105791	21102.3	92056.9	352972	896.557
E2	3	117749	19487.2	88011.3	329645	523.848
E3	3	93721.8	17067.6	90898.3	317903	63.4842
E4	3	103844	17418	92886	303922	289.44
E5	3	97425.3	17100.5	96679.2	303584	0
E6	3	110325	19208.8	102351	317777	631.037
E7	3	114023	19386.3	105759	316620	453.23
E8	3	100081	19033.5	101782	318503	147.347
E9	3	103635	19735.1	101092	337189	75.2397
E10	3	88644.8	15665	83193.5	302146	0
E11	3	98976.6	16130.7	81829.2	317467	0
E12	3	79382.9	6047.46	65177.9	328997	0
F1	3	103374	18013.4	83852.2	353400	1290.33
F2	3	100031	17483.9	82564.3	315750	94.9368
F3	3	110577	19371.1	92879.6	323893	948.458
F4	3	89304.1	16032.1	85745	284873	770.099
F5	3	109425	18169.5	95661.3	310026	235.101
F6	3	109473	18569.9	105683	342248	296.993
F7	3	105772	18412.9	102876	334077	186.841
F8	3	112846	19469.7	106281	348078	1012.12
F9	3	101277	17730.7	101625	348826	0
F10	3	89805.1	15820.7	89179.8	325976	0
F11	3	83140.7	13930.4	71237.8	279050	0
F12	3	86508.8	14975.5	75584.2	330992	0
G1	3	92287.7	19027.7	76769.6	337047	0
G2	3	128833	23585	82333	325286	2783.18
G3	3	111560	20178.5	83589.3	311768	154.369
G4	3	114003	20157.5	88049.3	308853	136.555
G5	3	123379	21281.1	92840.1	313396	958.126
G6	3	125367	22166.9	99270.1	333069	62.9721
G7	3	133556	23013.2	101252	341448	140.049
G8	3	140201	23752.1	103362	350734	51.457
G9	3	128905	21348.2	90337	317059	0
G10	3	125675	19931.7	81418.9	305649	0
G11	3	131719	22199.2	84076.8	344830	2071.9
G12	3	110630	18347	63684	283303	755.37
H1	3	103192	17914.9	61386.8	281348	200.007
H2	3	110658	19335.8	74065.3	312185	584.165
H3	3	106000	19375.3	79733.1	310936	0
H4	3	118164	20279.9	86274.1	322461	2688.8
H5	3	122682	20408.3	82976.3	296473	0
H6	3	135667	22641.7	96141.2	341642	518.038
H7	3	126178	19729.8	79351.1	296179	0
H8	3	129344	21735.3	90980	328065	446.49
H9	3	122812	19974.7	86125.5	326014	0
H10	3	128893	20659.4	82351.3	322386	65.1114
H11	3	140070	22818.2	86132	372123	0
H12	3	167352	26313.7	74704.4	341499	2258.91
A1	4	112232	19067.6	69843.5	323547	1048.73
A2	4	98813.5	17764	74912.1	306025	1311.71
A3	4	99897.1	16616.5	76260.3	290123	516.567
A4	4	100041	17802	81892.2	297681	47.8841
A5	4	92566.6	15445.5	77534.5	274715	99.2232
A6	4	71713.4	14098.8	79687.3	278334	0
A7	4	89083.4	19311.8	86966.9	289391	164.03
A8	4	98847.5	17625.2	84986.7	300005	589.036
A9	4	116901	23821.2	88976.7	312922	168.273
A10	4	94964.7	15836.1	76757.1	291103	0
A11	4	101237	18556	82708.7	338031	17.4235
A12	4	101224	16547.6	69986.2	339455	476.199
B1	4	94317.4	15248.7	61778.7	264729	0
B2	4	108569	17201.2	82973.2	324516	249.468
B3	4	125454	21108.2	88255.2	308622	144.641
B4	4	102610	18758.6	96645	328249	211.997
B5	4	101953	17523.9	96677	321459	0
B6	4	82699.5	14711.5	84169.1	280895	0
B7	4	85437.6	14649.9	84360.6	282281	0
B8	4	93452.3	15262.8	86818.1	294987	0
B9	4	87714.2	15030.7	81009	289212	323.37
B10	4	79835.4	13442.9	73487.1	267520	0
B11	4	99138.7	15899.9	81267.4	333982	0
B12	4	79262.5	14349.2	71534.5	313699	0
C1	4	46661.6	12780.1	66711	283124	0
C2	4	104320	18297.7	81807.1	313303	1171.18
C3	4	95139.9	18776.1	94753.2	333179	243.023
C4	4	107234	19062.7	91518	296311	412.042
C5	4	94021.3	17356.6	88933.1	284196	596.278
C6	4	88943.7	16442.5	82361.6	260818	0
C7	4	88533.2	15675.6	78440.1	248716	0
C8	4	100227	18460	91871	294457	0
C9	4	93507.7	16931.9	84899.1	279514	0
C10	4	100359	16734.8	84874.2	294816	561.214
C11	4	101698	17378.2	87209	340077	395.667
C12	4	114968	19147.6	84372.8	369920	1790.45
D1	4	88914.9	15463.9	63158.2	251677	1574.97
D2	4	83999.6	15192	74918.5	284154	607.547
D3	4	105614	18267.7	84870.5	294691	597.863
D4	4	95948.1	16918	88262.7	294854	806.76
D5	4	85377	15375.2	81621.4	259564	0
D6	4	87932.3	14628.8	82310.2	262333	0
D7	4	73643.3	12952.9	74958.6	238069	0
D8	4	94583.2	16629.8	90640.6	293818	0
D9	4	89055.4	15872.7	85094.2	287361	0
D10	4	87937.4	16066.7	84917.7	307369	0
D11	4	86442.4	14581.3	79410.1	316024	0
D12	4	116542	17386.9	78433.5	330115	0
E1	4	107617	21102.3	90803.5	348870	741.749
E2	4	119392	19345.2	86825.6	324300	723.358
E3	4	95352.6	16747.6	89860.4	313226	449.199
E4	4	103800	17542.8	92129.3	299337	353.422
E5	4	98363	17185.4	95676.1	299570	0
E6	4	110253	19047.5	100683	314093	0
E7	4	114371	19152.8	104187	311357	265.763
E8	4	101262	18816.2	100781	315242	0
E9	4	104416	19486.1	99562.8	330795	0
E10	4	89408.5	15609.6	82084.4	296090	30.9641
E11	4	99273.2	15909.9	80342.4	311480	0
E12	4	79871.3	6134.1	65286.9	328647	0
F1	4	104485	17933.6	82449.1	347549	1425.44
F2	4	99579.2	17240	82330.7	314806	647.605
F3	4	110330	19085.6	91528.1	318249	1003.74
F4	4	90549.2	16317.3	85965.7	285695	1063.66
F5	4	110269	18024.3	94558.4	305756	183.493
F6	4	108118	18462.3	103919	336932	0
F7	4	107096	18166.3	101931	329902	0
F8	4	113018	19304.7	104467	341935	801.532
F9	4	100983	17461.8	99963.6	341401	0
F10	4	92306	15781.6	87994.2	319161	0
F11	4	81537.8	13882	69836.5	273891	0
F12	4	86243.2	14798.2	74342.7	325627	0
G1	4	91711.5	19444.5	75704.7	332702	0
G2	4	129845	23364.8	81272	320781	2900.14
G3	4	111942	19837.1	81929.5	305577	55.8758
G4	4	115350	20343.8	86841.9	304277	101.747
G5	4	123911	21129.5	91792.9	309755	820.344
G6	4	125544	21939.3	97455.5	326700	356.842
G7	4	132577	22634.3	99984.3	333991	0
G8	4	138548	23788.6	101306	341531	228.34
G9	4	127849	21262.5	88742.3	309760	0
G10	4	124817	19491.6	80413.3	301823	0
G11	4	130825	21692.7	82616.3	335640	2367.88
G12	4	108932	17798.6	62408.2	278330	894.274
H1	4	103447	17702.3	61748.7	280325	1069.54
H2	4	110202	19365.6	73440	310313	636.661
H3	4	104792	18899.4	79043.4	309126	0
H4	4	116831	20065.7	85399	319667	2717.02
H5	4	122669	20285.3	81920	291402	0
H6	4	134949	22792.6	95973.7	340538	939.652
H7	4	125768	19466.1	78626.1	294661	0
H8	4	128751	21507.9	91042.4	327318	69.4539
H9	4	122353	20052.9	86339.4	326607	0
H10	4	127372	20778.3	82532.2	323344	206.56
H11	4	139127	22705.4	86234.1	372688	0
H12	4	167935	25748.8	73514.4	335331	2137.35
A1	5	113900	18795.3	68845.6	316850	1172.2
A2	5	99723.2	17397.4	73817.7	300166	1154.9
A3	5	99658.6	16773.1	75130.9	286013	748.475
A4	5	99711.8	17857.4	81466.3	293906	145.568
A5	5	92940	15614.3	77010.9	271872	93.9076
A6	5	73439.5	13999.4	78536.5	274803	0
A7	5	90713.1	19730.1	86740.4	284899	309.834
A8	5	100073	17336.3	83950.1	295563	618.838
A9	5	116550	23342.8	87616.2	309673	453.119
A10	5	96402.7	15850.6	75751	285401	0
A11	5	101412	18245.1	81392.1	331456	24.393
A12	5	100246	16483.9	68279.4	332961	937.725
B1	5	94154.4	15281.2	61102.8	260757	0
B2	5	108744	17024.2	81755.2	319438	0
B3	5	126682	21291.8	86688.7	304942	268.47
B4	5	104259	18712.4	95186.9	322994	463.553
B5	5	102418	17418.9	95487.1	317542	0
B6	5	83020.3	14710.6	82858.1	276415	0
B7	5	87128.2	14561.8	82841.6	276761	0
B8	5	92250.1	15128.2	85967.8	292035	0
B9	5	86876.5	14705	79682.2	283724	196.759
B10	5	78155.5	13141.2	73281	267162	0
B11	5	98697.7	15263.2	79548.4	327286	0
B12	5	80583.9	14330.3	71022.3	309519	0
C1	5	47204.8	12533.6	65886.1	279087	0
C2	5	105080	18500.8	80646.4	307252	3111.39
C3	5	95257.2	18849.1	93327.5	327393	280.784
C4	5	106997	19017.6	90550.3	292043	311.496
C5	5	93837.6	17389.3	87422.9	279848	458.891
C6	5	90313.2	16421.9	81411.4	257601	0
C7	5	88504.8	15531.4	77344.1	244391	0
C8	5	99574.8	18153.3	90842.6	289811	27.0571
C9	5	93968	16695.8	83589.8	275401	151.662
C10	5	99670	16483	84609.3	294342	118.662
C11	5	102148	16976.6	85019.9	330970	243.828
C12	5	114243	18790.5	82865.7	360989	2409.86
D1	5	89818.9	15028.4	61620.5	246271	1912.4
D2	5	84558.4	14911.6	73294.5	277660	570.804
D3	5	106229	17849.6	83801.1	290424	559.232
D4	5	96273.7	17019.9	87366.5	290066	473.13
D5	5	85370.3	15197.1	80465.5	255157	0
D6	5	88220.2	14792.3	80976.5	256641	0
D7	5	73817.7	13159.7	74019.6	234759	0
D8	5	94158.2	16692.8	89534.6	290254	0
D9	5	89677.1	15391.3	84330.5	283131	0
D10	5	86872.5	15617	83350	301198	0
D11	5	86409.9	14375.6	78037	309039	0
D12	5	117057	17442	78671.9	329563	171.22
E1	5	107948	21343	89734.8	343024	1041.87
E2	5	118942	19308.8	85561.2	318699	650.809
E3	5	95711.1	16778.4	87959.7	306975	74.0649
E4	5	104480	17167.5	90850.7	295462	729.186
E5	5	98143	16944.3	93732.4	294567	0
E6	5	109851	18687.1	99288.5	308406	60.6193
E7	5	113814	18930.2	102921	304882	165.412
E8	5	101012	18430.7	98976.9	308662	0
E9	5	103062	19441.7	97922.6	323992	0
E10	5	90918.2	15713.4	80635.7	291353	0
E11	5	98985	15540.3	78899.4	304490	253.847
E12	5	81536.8	6011.04	65035	327497	0
F1	5	104571	17792.4	81211.3	342872	1735.31
F2	5	100607	17397.6	82459.9	314115	457.731
F3	5	112448	19362.3	89842.2	311253	2031.72
F4	5	91896.3	16742.2	86332	285372	1438.43
F5	5	109520	17779.6	93563.3	302369	123.285
F6	5	107448	18083.6	102095	329505	0
F7	5	106065	18013.6	100244	321786	0
F8	5	111137	18692	102027	332327	395.394
F9	5	101258	17752.3	98390.9	335111	0
F10	5	92665.6	15690.5	86352.6	312115	0
F11	5	82538.4	13715.5	68749.7	269242	0
F12	5	84934.1	14427	72814.6	318074	0
G1	5	90679.5	18980.5	73908.7	321686	0
G2	5	128146	22659.3	78825.6	310809	2363
G3	5	110840	19411.3	79999.7	296696	0
G4	5	113037	19437.3	84654.1	293659	663.142
G5	5	122320	20409.3	88913.2	298453	686.189
G6	5	123885	21253.8	95385.1	315916	31.9424
G7	5	130516	22049	98256.1	327465	0
G8	5	137768	23237.2	100338	336827	0
G9	5	124203	20560.8	86746.2	302200	0
G10	5	124771	19891.9	79707.8	299915	0
G11	5	130002	21633.1	82206.3	334071	2470.44
G12	5	110520	18059.5	62316.6	278454	691.872
H1	5	104160	18030.7	61780.3	279967	455.335
H2	5	109942	19793.7	73504.2	309200	495.926
H3	5	105351	19239.5	79268.3	309027	0
H4	5	117021	20089.4	85258.8	318001	3023.87
H5	5	121889	20222.9	80571.6	286440	0
H6	5	133482	22509.1	96022.1	339205	552.069
H7	5	125478	19338.9	78124.9	293614	0
H8	5	128433	21486	91212.2	326641	26.158
H9	5	122641	19966.1	86158.4	326023	0
H10	5	127192	20714.8	82409.3	322952	0
H11	5	139137	22638.2	85639.3	371671	235.927
H12	5	167970	26361.6	73745.1	334467	2680.97
A1	6	113343	19011.1	67818.2	311816	780.969
A2	6	97808.3	17622.3	72861.9	295986	1261.35
A3	6	100427	16479.6	74251.1	282180	984.364
A4	6	99437.8	17541.3	79793.4	287171	0
A5	6	92426	15314.4	75048.9	263496	0
A6	6	72717.2	13683.1	77454.6	270352	0
A7	6	90646.7	20459.9	86052.7	281623	345.456
A8	6	100188	17480.4	82702.1	291126	977.343
A9	6	115161	22815.2	86145	306015	273.696
A10	6	96049.7	15891.2	74666.2	281610	0
A11	6	100051	18085.1	79895.4	323949	108.026
A12	6	101265	16363.4	67038.2	325585	720.301
B1	6	96040.4	15542.7	60331.2	255108	75.5922
B2	6	108167	16518.4	79301.9	309423	0
B3	6	127976	21022.1	85519	298598	620.186
B4	6	103534	18338.2	93565.8	316504	622.805
B5	6	103949	17161.3	94931.2	313949	0
B6	6	83157.1	14221	82107.8	273480	0
B7	6	87906.1	14515.3	82157.4	274197	0
B8	6	92478.4	14502.4	83866.5	283289	0
B9	6	86929.9	14737.6	78501	279705	120.622
B10	6	77379	13355.4	73004.9	266102	0
B11	6	98558.5	15217.4	77915.4	319572	0
B12	6	82189.1	14486.3	69945.8	306386	0
C1	6	47541.8	12537.9	64749.1	274333	0
C2	6	105053	18366.1	79327	301083	4112.23
C3	6	94211.4	18497.6	91083.4	322008	200.421
C4	6	106529	18757	88908.6	286468	426.828
C5	6	93985.6	17066.6	86308.2	276535	452.349
C6	6	90094.2	16324.5	80176.7	251000	0
C7	6	87987.3	15375.5	75814.9	239151	0
C8	6	97124.4	17756.1	87844.4	279402	0
C9	6	92055.5	16435.2	81756.5	267950	0
C10	6	98221.5	16641.8	84358.8	293574	480.485
C11	6	101158	16608.3	83454.7	323147	371.284
C12	6	114442	19070.2	80876.7	353294	2433.78
D1	6	88660.1	15159.8	60433	239560	1765.83
D2	6	86189	15098.2	71634.2	272075	525.516
D3	6	105600	17761.7	82177.2	282783	685.243
D4	6	97471.5	16658.5	85667.2	283194	441.913
D5	6	84624.7	14793.7	78346.4	247583	0
D6	6	87344.5	14327.9	79728.3	252878	0
D7	6	74257.6	12871.2	73107.3	231134	0
D8	6	93111.4	16168.3	87559.3	282876	0
D9	6	89115.6	15301.7	81978.5	276546	0
D10	6	86215.9	15513.1	82054.3	294498	0
D11	6	84717.7	14049.4	75807	301043	0
D12	6	118229	17763	78194.2	329178	0
E1	6	107899	20624.9	88638.5	337517	379.897
E2	6	117821	18911.2	83698.1	308318	785.238
E3	6	93752	16489.2	85525.4	297290	275.098
E4	6	102310	16901.8	88148.4	286047	672.314
E5	6	97772.4	16702.3	91423.9	286195	0
E6	6	109877	18579.2	98031.2	302239	0
E7	6	112413	18677.1	100068	297104	0
E8	6	100633	18593.7	97753.9	302140	0
E9	6	104220	19530.5	96513	318381	0
E10	6	91252.3	15326.9	78868.9	284301	0
E11	6	98988.2	14983.1	76903	295381	0
E12	6	83090.9	6495.39	65285	328187	0
F1	6	103105	17614.6	78973.6	329402	1742.75
F2	6	101944	17509.6	82271.7	314210	428.346
F3	6	111511	18712.6	86813.7	299879	1303.4
F4	6	93353.1	17172.1	86555.7	286507	1121.39
F5	6	108294	17379.3	90511.1	291436	0
F6	6	106835	17765	99589.3	320694	0
F7	6	105989	17492.9	98946.9	317844	0
F8	6	110134	18552.2	101463	330176	469.53
F9	6	98140.9	17148.7	96095.8	327298	215.504
F10	6	92449.2	15347.7	84643.5	305982	0
F11	6	81727.3	12856.8	66562.6	259454	0
F12	6	84194.9	13728.4	71828.9	313902	0
G1	6	91982.1	18422	72964.1	318502	0
G2	6	127306	22735.7	78217	308265	3180.62
G3	6	110061	18983.5	79102.8	292241	192.251
G4	6	112950	19665.3	84075	292168	499.811
G5	6	121231	20242.2	88171.4	296559	455.948
G6	6	122665	21220.1	94056.4	311113	491.912
G7	6	129898	22060.6	97775.3	326217	0
G8	6	136540	23655.3	100319	337854	317.318
G9	6	123835	20414	86387.5	302226	0
G10	6	125558	20014.6	79906.2	299583	0
G11	6	130498	21097.4	81662.1	333763	2393.84
G12	6	111795	17912.2	62874.2	278073	672.028
H1	6	106906	17880	61516.1	280592	1529.13
H2	6	110587	19777	73438.8	307246	330.617
H3	6	105347	18882.8	78899.3	308349	0
H4	6	116825	19749.1	85090.5	318649	2919.16
H5	6	122597	19973.6	80536.7	285203	0
H6	6	134281	22482.1	96019.2	339341	488.733
H7	6	125565	19210.1	77748.9	292342	0
H8	6	128968	21392.8	91108.5	325998	0
H9	6	121920	19988.2	86247.4	325462	0
H10	6	127481	20650.2	82594.8	323151	5.61305
H11	6	138875	22985.4	85751.1	370617	0
H12	6	171430	26459.3	73680.8	334611	2518.9
A1	7	114922	18589.4	66153.1	304015	1274.84
A2	7	99824.2	16968.8	70741.9	285178	1390.69
A3	7	99459	16085.5	72491.5	273056	754.446
A4	7	97894.9	17037.5	78642.5	282170	90.9798
A5	7	90686	15035.9	74685.8	262220	69.9878
A6	7	71801.8	13460.6	75720	262396	0
A7	7	89478.3	20293.4	84370.1	273729	549.25
A8	7	99020.1	17108.1	81211	283886	859.887
A9	7	118888	24099	85775	297157	373.038
A10	7	95693.4	15356.3	72464.5	271708	0
A11	7	99854.4	17860	78187.1	316124	0
A12	7	101300	15630.8	65869.1	317203	1012.42
B1	7	98801.5	15257.4	59277.7	250472	382.103
B2	7	108700	16854.4	78472.2	305502	0
B3	7	127579	20786.3	83836	290637	117.586
B4	7	104638	18485.5	91844	308243	348.933
B5	7	102007	16630.2	92519.6	305830	0
B6	7	83413	14090.7	80250.9	264824	0
B7	7	87986	14430.5	79897.4	264603	0
B8	7	91173.8	14474.4	83346.5	281841	0
B9	7	85129	14264.5	76510.9	271112	355.022
B10	7	78329.1	12965.2	73108.4	265338	0
B11	7	101687	15358.1	76495.9	312519	0
B12	7	83811.7	14365.8	68922.6	302063	0
C1	7	48544.1	12174.1	63236.4	266223	31.6848
C2	7	105899	18060.4	78174.4	295267	4285.59
C3	7	94058.6	18023.1	89108.5	310794	845.255
C4	7	104447	18018.5	87060.2	279535	457.387
C5	7	92089.3	16729.5	84265.9	267722	391.599
C6	7	90041	16320.5	79103.7	248487	0
C7	7	89324.5	15406.1	75526.4	237735	0
C8	7	98805.3	17803.2	87616.8	278106	10.6296
C9	7	91372.5	16364.1	80940.5	263881	0
C10	7	99835.4	16767.7	84419.5	292670	345.288
C11	7	101137	16255	80094.4	309857	73.1485
C12	7	115703	18657.8	78778.8	341928	2609.24
D1	7	88635.8	14559.6	58582.8	232258	1521.53
D2	7	86693.2	14931.1	70281.1	265715	730.595
D3	7	105985	17697.7	81267.1	280218	519.681
D4	7	97870.8	16351	84861.2	280234	647.749
D5	7	85472.7	15002.7	77746.5	246446	0
D6	7	88344.5	14646.2	78016.4	246202	0
D7	7	73203.4	12497.9	71477	225868	0
D8	7	91994.8	16143.1	86796.9	280242	0
D9	7	88982.6	15151	81628.3	274204	0
D10	7	86630.3	15247	79947.7	287371	0
D11	7	83437.5	13390.8	73959	291544	0
D12	7	119137	17658.1	78467.4	330313	262.608
E1	7	106480	20388.4	85910.6	327244	801.583
E2	7	118347	18845.1	83292.1	305979	723.358
E3	7	93484.9	16306	84579.9	293009	84.6456
E4	7	101677	16598.9	87622.3	283490	503.728
E5	7	96014.3	16578.8	90384	281806	0
E6	7	108834	18056.5	96368.6	297622	283.221
E7	7	111738	18643.4	99422.7	295081	91.5282
E8	7	100193	18266.7	95619	296478	0
E9	7	103883	18892.9	94154	309532	73.0588
E10	7	92338.8	15521.6	78760.2	282312	0
E11	7	98484.5	15265.9	76474.9	295302	0
E12	7	84608.8	6504.25	65379	328202	0
F1	7	102211	17472.1	78213.8	325970	1098.21
F2	7	103623	17726.6	82589.2	314896	99.4576
F3	7	110633	18375.9	86334.7	297156	1387.77
F4	7	95444.8	17287.9	86949.1	287596	1193.8
F5	7	108683	17403	90032	289430	243.702
F6	7	105708	17968.7	99146.1	318873	0
F7	7	105452	17517.6	98243.9	316054	0
F8	7	111111	18376.7	101361	329604	320.183
F9	7	99569.8	17089.3	95363.6	325185	578.689
F10	7	92032.2	15004.8	84533.5	304987	0
F11	7	81095.4	13136	66096.2	256915	0
F12	7	82208.8	13832.5	71197.2	312523	0
G1	7	93283.2	18530.4	73220.3	319508	0
G2	7	127067	22703.1	78073.8	307103	3013.85
G3	7	110226	18983.5	79056.8	291604	0
G4	7	113697	19563.1	84638.6	292332	440.012
G5	7	120009	20176.5	87698.9	294091	493.113
G6	7	122785	20801.4	94020.2	311127	222.684
G7	7	129406	21874.5	98066	325792	203.265
G8	7	136791	23413.5	100133	337715	1112.76
G9	7	124224	20694.8	86573.3	301534	0
G10	7	126702	20010.3	80197.8	300441	0
G11	7	129151	21635.7	81972	332154	1873.27
G12	7	112103	17944.5	62695	278167	1043.76
H1	7	106578	17803.8	61411.2	281501	594.347
H2	7	110260	20122.8	73427.6	308838	277.004
H3	7	106087	19478	79068.6	308599	0
H4	7	117062	20239.1	85098	316948	3266.07
H5	7	121639	19967.7	80464.6	284885	0
H6	7	135269	22461	96099.6	339710	273.199
H7	7	126323	19277.6	78038.4	292525	0
H8	7	130384	21663.2	91308.5	325996	22.55
H9	7	121431	19781.9	86215.5	325274	0
H10	7	126828	20292.3	82659.6	323383	125.732
H11	7	139121	22815.4	85959.5	371904	0
H12	7	172654	26548.1	73946.2	335143	2537.47
A1	8	117158	18655.8	66505.9	303288	371.89
A2	8	100198	16879.8	70545.7	284081	1331.17
A3	8	98721.7	15766.3	71689	270417	424.998
A4	8	97809.2	16877.1	78126.2	280797	143.652
A5	8	90761.7	14986.2	74682.3	261740	49.6116
A6	8	71509.2	13415	75326.1	262132	0
A7	8	88704.7	20188.2	83211.3	269469	357.054
A8	8	96925.3	16863.8	79980.4	278836	857.257
A9	8	118225	24330.5	85803.6	295136	664.981
A10	8	96438.4	15523.3	71985.3	269244	332.66
A11	8	102042	18124	77626.6	315360	0
A12	8	101339	15587.5	65278.3	314802	1276.53
B1	8	101636	15867.1	59560.6	249994	0
B2	8	109381	16929.7	78845.4	305636	194.679
B3	8	127979	21134.9	83677.3	288719	585.847
B4	8	104895	18213.4	90339.6	302752	185.624
B5	8	100168	16590.5	92576.1	304179	0
B6	8	83714.6	13880.1	79696.3	263234	0
B7	8	88748.4	14020	79456.7	263371	0
B8	8	91798.2	14445.5	82928.9	280595	0
B9	8	85907.3	14284.1	76376.4	269941	636.473
B10	8	79224.9	13456.6	72827.7	265371	0
B11	8	101168	14700.7	74689.7	305137	0
B12	8	85325.2	14050.3	67364.6	292224	0
C1	8	48779.4	12209.4	63078	264038	129.177
C2	8	107367	17805.6	77871.9	293584	3808.85
C3	8	94168.2	17906.9	88640.1	308684	596.423
C4	8	103576	17743.5	86052	276660	439.643
C5	8	90823.9	16330.5	83720.7	264500	621.512
C6	8	90046.3	15883.5	79158.2	248255	0
C7	8	89708.2	15542.4	75930.6	237851	0
C8	8	99578.4	17810.6	87372.8	277963	0
C9	8	92747.2	16681.8	80651.3	263407	0
C10	8	101263	16840.1	84366.5	292617	221.762
C11	8	101837	16149.8	80374.1	309139	975.313
C12	8	116784	18302	78991.5	342011	2864.45
D1	8	88191.1	14360.9	56770.3	223354	1649.78
D2	8	87788.4	15070.8	70937.3	266040	2492.57
D3	8	107123	17769	81287.4	279373	811.254
D4	8	97521.9	16610.5	84798.5	279679	702.379
D5	8	86784.2	15108.1	78006.4	245734	0
D6	8	88955.5	14192.2	77386	243436	0
D7	8	72705.1	12712	71032.5	224003	0
D8	8	92893.9	16080	86678	279707	0
D9	8	90129	15121.5	81533.2	273336	0
D10	8	87054.2	15193.3	78758.7	281508	0
D11	8	82471.7	13188.2	72498.9	286916	0
D12	8	120233	17814.9	78329.8	330393	0
E1	8	104845	20049.7	85360.5	324352	671.468
E2	8	118821	18773.5	83037.9	305642	755.365
E3	8	94299.9	16217.4	84377.7	292040	150.054
E4	8	101403	16370.5	87001.5	282124	784.028
E5	8	95704.2	16043.6	89771.6	279489	0
E6	8	106876	17925.4	95625.3	296058	172.914
E7	8	112784	18434.9	99273.3	293519	0
E8	8	99355.2	18165.4	95502.5	294365	0
E9	8	104298	18939.4	94073.8	308145	0
E10	8	92790.1	15819.1	78478.3	282156	0
E11	8	98484.5	15142.7	76535.5	294354	717.993
E12	8	85751.7	6630.26	65351.7	328429	0
F1	8	103552	17276	78155	325423	1805.97
F2	8	104280	17716.1	82348.8	315074	583.183
F3	8	111099	18575.7	86340.6	296482	2250.89
F4	8	96901.5	17392.9	87529.1	287244	1545.09
F5	8	108118	17154.5	89653.1	287454	0
F6	8	107517	17563.1	99202.6	317991	0
F7	8	104835	17781.2	97998.2	315090	0
F8	8	111909	18575.4	101204	329516	1004.6
F9	8	99039.1	17027.7	95390.9	323995	574.313
F10	8	93504.8	15326	84491.1	305063	0
F11	8	81716	13027.5	65831.4	255668	0
F12	8	81147.6	14063	71874.1	311967	0
G1	8	94533.8	18520.7	73561.9	320095	0
G2	8	127557	22888.5	78181.2	307362	2928.3
G3	8	109964	19191.1	78516	290618	0
G4	8	114167	19640	84820	292673	742.576
G5	8	120475	20038.7	87627.4	292398	530.278
G6	8	124563	20844.2	94191.8	310868	0
G7	8	130897	22114.6	98059.1	325659	0
G8	8	136582	23482.3	100330	336799	1805.28
G9	8	125763	20721.4	86632.9	301267	0
G10	8	126641	19956.5	80230	300504	160
G11	8	130045	21533.6	81863.9	331513	2727.48
G12	8	112624	18112.8	63069.3	278380	1095.35
H1	8	108912	18062.4	62169.5	281701	1097.91
H2	8	111781	19990.4	73458	308056	121.748
H3	8	106873	19500.8	79059.6	308299	0
H4	8	117630	20133	85081.1	318232	3005.66
H5	8	122699	19967.7	80813.9	284992	0
H6	8	136779	22677.3	96660.1	340979	355.442
H7	8	126172	19077.8	77846	293105	0
H8	8	130679	21477.8	91392.9	326250	428.45
H9	8	121854	19737.5	85856.3	325570	0
H10	8	128110	20817.6	82891.7	322904	526.504
H11	8	140860	23362.6	85923.6	371472	217.779
H12	8	175267	26887.4	74092.9	334633	2728.24
A1	9	118590	18815.2	66219.5	302432	505.77
A2	9	102679	17037.9	70445.9	283162	1178.94
A3	9	97409.8	15924	71542.1	268726	525.525
A4	9	96673.7	16660.4	78031.2	279886	0
A5	9	90882.9	15021.4	74763.8	261577	107.196
A6	9	72043.7	13393.8	75436.1	261682	0
A7	9	87824.3	20347.6	83273.1	268472	614.697
A8	9	98399	16863.8	79945	277929	702.986
A9	9	116997	24584.2	85909.5	294214	723.775
A10	9	98429.8	16029.2	72255.5	268820	270.1
A11	9	103099	18105.7	78362.6	314731	0
A12	9	101093	15916.6	65398.5	314667	1024.43
B1	9	102964	15627.3	59608	250077	184.321
B2	9	111835	17008.6	78449.1	305974	283.275
B3	9	130365	21219	83331	288886	637.876
B4	9	106337	18288.1	90315.4	302170	555.858
B5	9	101301	16474.6	92093.1	303797	0
B6	9	84048.6	13996	79816.6	263011	0
B7	9	88903.9	14518.6	79577.2	263624	0
B8	9	90476.6	14404.9	82705.5	280079	0
B9	9	87541.2	14395.6	76505.8	270502	68.438
B10	9	81689	13401	73255.8	265640	0
B11	9	101623	14896.9	74859.6	302983	0
B12	9	84550.5	14010.1	66464.9	285962	0
C1	9	50458.4	12462.9	63059.2	263595	42.2465
C2	9	108472	18142.3	77943.3	293529	4280.55
C3	9	94805.4	17542.9	88919	308669	755.211
C4	9	103878	17945.4	86234.9	276170	337.125
C5	9	90930.1	16400.5	83048.4	264102	602.82
C6	9	90333	16052.1	79507.7	248267	0
C7	9	90846.3	15431.9	76117	238249	0
C8	9	100545	17995.3	87940.1	277718	0
C9	9	93616.5	16613.3	80830.8	264011	0
C10	9	103050	16987.6	84813.5	293366	317.081
C11	9	102641	16417.2	80428.6	309723	386.8
C12	9	117961	18584.3	78748	341881	3390.81
D1	9	88050.7	13610.6	54261.3	211448	1852.09
D2	9	89248.9	15220.3	71213.4	266324	3591.45
D3	9	109398	17983.1	81631.9	280151	775.382
D4	9	99422.1	16602.8	84769	279245	656.529
D5	9	87774.9	15153.5	78001.7	245885	0
D6	9	89625.9	14438.3	77184.2	243287	0
D7	9	71788.7	12278.1	70472.1	222220	0
D8	9	93416.8	15899.7	86222.6	278813	0
D9	9	90322.1	15316.9	81665.1	274574	0
D10	9	86133.2	14458.6	76662.9	272396	0
D11	9	83033.5	13155.8	72527.2	286130	0
D12	9	122018	17507.7	78330.8	330093	0
E1	9	106313	20128.9	85490.1	323856	850.97
E2	9	121387	19143.6	82989.5	305533	862.055
E3	9	95541.9	16362	84653.7	292344	100.036
E4	9	101460	16512.4	87191	282533	873.399
E5	9	96208.2	16211.4	89367.9	279089	0
E6	9	106569	17510.6	95891.8	294531	0
E7	9	113587	18795.5	99197	293789	0
E8	9	98646.3	18094.4	94903.8	292968	0
E9	9	106171	19365.9	93833.5	307856	0
E10	9	93813.8	15258.8	78616.3	282115	0
E11	9	99566.8	15294.9	76258.8	293337	0
E12	9	86535.1	6635.18	65556.6	328169	0
F1	9	103994	17578	77985.9	325216	1794.81
F2	9	104638	17607.6	82862.5	315718	149.186
F3	9	113224	18733.2	86471.4	297016	2345.93
F4	9	98690.1	17752.4	87326.4	287943	1713.4
F5	9	108700	17280.6	89803.7	287388	220.766
F6	9	107820	17853	99357.1	317974	0
F7	9	104025	17445.5	97894.9	314990	0
F8	9	113007	18798.2	101440	329790	819.798
F9	9	100505	17120.6	95589	324121	381.782
F10	9	93272.8	15209.9	84209.1	304954	0
F11	9	82652.1	12862	65717.7	255668	0
F12	9	83777.7	13807.6	71489.3	311688	0
G1	9	95037.2	18984.7	73468.8	320207	0
G2	9	129651	22687.4	78525.1	306757	2673.8
G3	9	110195	18784.7	78869.2	290333	331.466
G4	9	114770	19914.1	84708.8	293218	420.376
G5	9	119810	19715.5	87462.2	292380	656.276
G6	9	125425	21520.6	94287.3	311367	640.673
G7	9	131880	22504.1	98451.2	325633	137.131
G8	9	137497	23372.6	100630	336983	2211.58
G9	9	126744	20612	86944.9	301401	0
G10	9	127218	20363.3	80603	300211	0
G11	9	129906	21365.2	81338	331144	2031.65
G12	9	114514	18384.8	63056.1	278555	752.724
H1	9	110618	18143.3	62583.1	281641	1076.63
H2	9	113222	20009.5	73600	308143	384.231
H3	9	107975	19557.8	79628.2	308909	0
H4	9	118236	20138.7	85508.4	318317	2655.11
H5	9	122003	19869.7	80402.3	284635	0
H6	9	136923	22699.4	96682.4	340203	705.212
H7	9	126955	19416.8	78011.2	292471	0
H8	9	131672	21438.5	91582.8	326311	297.66
H9	9	121629	19736.5	86059.6	324628	0
H10	9	130549	20666.3	82875.8	323326	281.775
H11	9	141547	23175.4	85885	372307	450.914
H12	9	176503	26351	74389.6	335251	2858.24
A1	10	118945	18951.3	66179.6	303146	589.074
A2	10	101906	17547.3	70488	283258	1229.3
A3	10	98093.3	15790	71413.9	268140	871.893
A4	10	96019.7	16760.8	77828.1	279046	26.8151
A5	10	89818	14882.5	74525.3	261288	0
A6	10	71805.4	13424.7	75438.6	261025	0
A7	10	88674.2	20634.4	83563.8	268440	423.329
A8	10	100571	16979.2	80089.9	277446	716.134
A9	10	119346	25192.8	86097.5	293923	95.2869
A10	10	99339.4	15986.8	72197.2	269156	53.6229
A11	10	105924	18270.3	78393	315249	189.336
A12	10	104032	16389.2	65565.5	314974	1352.56
B1	10	103912	16019	59028.8	249311	126.332
B2	10	112636	16774.3	79028	305302	191.181
B3	10	132699	21718.2	83823.6	288710	381.893
B4	10	107078	18344	90325.5	302186	193.739
B5	10	102129	16303.2	91922.6	302866	0
B6	10	85397.7	14170.2	79944.7	262956	0
B7	10	89554.7	14146.3	79591.9	263399	0
B8	10	90939.8	14325.4	82557.2	278862	0
B9	10	87673.5	14500.7	76499.1	270263	745.974
B10	10	81904.6	13438.3	73539.3	265663	0
B11	10	102969	14713.7	74715.8	303813	0
B12	10	85738	14013.7	65882.4	285669	0
C1	10	51476.6	12517.2	62856.6	263629	112.928
C2	10	107798	18478	77792.6	293924	4172.71
C3	10	96704.6	17955.9	88844.2	308335	308.862
C4	10	104319	17983.9	86150.9	275605	282.909
C5	10	92453	16330.5	83230.7	264635	411.226
C6	10	90791.5	16026	79703.6	248629	0
C7	10	91443.9	15488.3	76109	238147	0
C8	10	102069	17757	88247.2	278471	121.757
C9	10	94370	16771.3	81154.5	264345	0
C10	10	104453	17215.1	84693.1	293516	317.081
C11	10	103627	16369.9	80149.9	309502	471.032
C12	10	119187	18874.5	79713	341850	3369.55
D1	10	88701.5	14020.2	54172	211367	1922.33
D2	10	89197.7	15171.6	71232.5	266208	3923.85
D3	10	111730	18723.3	82193.8	280946	1118.46
D4	10	100709	16716.2	84859.2	279365	613.606
D5	10	88628.8	14957.3	78179.6	245639	0
D6	10	90121.5	14554.9	77585	242813	0
D7	10	71140.8	12320.1	70413.7	222129	0
D8	10	93476.6	15807.6	86620.6	279684	0
D9	10	90291.6	15025.2	81654.5	274755	0
D10	10	86720	14294.7	76262.4	271104	0
D11	10	83634.6	13064.6	72819.2	286049	0
D12	10	122258	17816	78196.2	330613	344.541
E1	10	106700	19927.7	85210.2	323613	880.412
E2	10	122346	19210.8	83390.1	305759	634.805
E3	10	97210.2	16427.5	84758.7	291455	228.928
E4	10	102971	16765	87278.5	282663	466.151
E5	10	97682.3	16509.4	89709.9	279112	0
E6	10	107320	17901.1	95721.8	294745	0
E7	10	114329	18837.8	99107.2	293712	0
E8	10	99308.8	18115.3	94820.5	292428	0
E9	10	106274	19419	94026.2	307291	46.8885
E10	10	94063.4	15769.7	78897.3	282873	106.876
E11	10	101063	15436.3	76693.1	294086	56.2924
E12	10	87561.7	6581.04	66023.8	328980	0
F1	10	105034	17459	78283.7	325190	1845.63
F2	10	105937	18004.3	83042.8	315532	256.555
F3	10	114242	18990.2	86696.6	296583	2683.42
F4	10	98513.7	17871.3	87768.9	287725	1483.44
F5	10	109874	17258.8	89815.3	287140	204.519
F6	10	109285	17848.5	99330.2	318082	0
F7	10	104680	17297.5	97707.7	313624	0
F8	10	112871	18858.1	101690	328937	616.729
F9	10	100467	17319.3	95711.6	323894	181.592
F10	10	94286.5	15663.4	84873.2	305303	0
F11	10	82573.3	12768.3	65606	256061	0
F12	10	84943.5	14087.8	71780.4	312722	0
G1	10	95742.4	18902.7	73806.5	319437	0
G2	10	129939	22914.3	78572.8	307412	3103.73
G3	10	111304	19384.1	78798.4	290749	262.332
G4	10	115849	19781.1	84999.7	293484	148.158
G5	10	120954	20421.2	87571.7	292049	668.966
G6	10	126277	21357.6	94368.9	311950	0
G7	10	133408	22804	98303.4	326012	0
G8	10	137513	23585.5	100621	336722	2313.42
G9	10	127620	21146.2	86868.4	301568	0
G10	10	128254	20151.3	80406.9	300957	0
G11	10	131406	21735.2	81871.7	330906	2466.54
G12	10	115133	18097.3	63427.8	279218	1308.34
H1	10	111882	18425.6	62478.2	282475	1276.64
H2	10	114580	20416.1	73738.6	308496	569.645
H3	10	107809	19504.9	79516.3	309006	0
H4	10	118126	20265.7	85625.3	318515	2754.36
H5	10	121536	19864.7	80364.1	284621	0
H6	10	138220	22697.5	96789.8	341064	657.945
H7	10	128285	19364.9	78696.9	293330	0
H8	10	131840	21549.9	91442.4	326983	0
H9	10	123241	19687.3	86058.7	325331	0
H10	10	130775	20946.9	83092	324429	0
H11	10	142044	23022.6	86439.8	372397	251.284
H12	10	176016	26967.3	74277.5	335713	2959.54
A1	11	121072	19177.2	66522.1	303227	816.67
A2	11	103099	17418.5	70577.8	284595	1214.42
A3	11	100639	15955.5	71500.1	268395	561.356
A4	11	96070.5	17138.8	77870.4	278784	0
A5	11	89271.9	14980.2	74526.1	261563	307.415
A6	11	71083.2	13296.8	75314.3	260714	0
A7	11	89740.3	20942	83787.8	268563	304.035
A8	11	101128	16939.6	80341.7	277659	697.727
A9	11	121217	25809.2	86369.6	293452	605.173
A10	11	100970	15772.4	72396.5	268975	474.662
A11	11	106773	18502.3	78559.6	315319	0
A12	11	104577	16177.9	65611	316181	957.733
B1	11	105494	16071.1	59649.1	249758	502.222
B2	11	112531	16924.9	78994.5	305716	300.761
B3	11	135520	21681.3	83748.4	289046	516.128
B4	11	108280	18410.8	90390.9	301705	333.718
B5	11	102977	16877.9	92405.5	303760	0
B6	11	85180.3	14303.8	79986.8	263121	0
B7	11	89866.4	14212	79454.2	262920	0
B8	11	92761.6	14362.4	82649.2	278521	0
B9	11	89379.4	14541.4	76433.9	270604	349.889
B10	11	82207.9	13429.2	73618.6	266297	0
B11	11	101900	14633.1	74377	303336	0
B12	11	85880.6	13646.2	66110.2	285590	259.401
C1	11	52287.8	12508.6	63044.5	263255	95.867
C2	11	109812	18044.9	77993.5	294178	4160.61
C3	11	97632.1	17857.9	89164.9	308082	619.66
C4	11	105969	17842.5	86136	274636	886.187
C5	11	93245	16655.8	83731	263404	863.575
C6	11	91883.4	16272.2	79451.6	248633	0
C7	11	91512.3	15562	76275.3	237835	0
C8	11	101859	18275.2	87882.7	278419	0
C9	11	95374.1	16838.9	81524.4	263646	0
C10	11	104541	17374.8	85219	292982	613.736
C11	11	104541	16422.5	80506.9	309682	128.564
C12	11	120171	19025.5	79320.9	341537	3650.01
D1	11	89911.4	14012.1	54396	211659	1815.45
D2	11	90141.9	15337.9	71162.4	267201	4187.89
D3	11	113005	18833.1	82365.1	280895	1472.58
D4	11	100959	17081.4	85106.3	278880	830.173
D5	11	89104	14918.2	78081.8	246065	0
D6	11	90670.7	14480.1	77730	243639	0
D7	11	72339.3	12449.4	70365.3	221615	0
D8	11	94838.8	16090.7	86556.3	278888	0
D9	11	91398.4	15168.2	82109.5	274799	0
D10	11	86352.9	14367.3	76138.5	270350	0
D11	11	84499	13400.9	72879.9	285646	0
D12	11	122729	17870	78208.5	330105	0
E1	11	108260	20372.7	85651.2	323986	1221.37
E2	11	122568	19425.6	83288.9	305334	1157.59
E3	11	97789.2	16464.1	84525.4	291910	591.557
E4	11	103509	16550.6	87429.8	282598	879.492
E5	11	98102.4	16175.7	89829.2	279196	0
E6	11	107151	17632	95961.2	294717	203.721
E7	11	115421	18585.9	99492.3	293301	40.8017
E8	11	99812.6	18179	94868.6	292754	0
E9	11	106789	19448.2	94244.9	306786	0
E10	11	94622.6	15715.4	79039.2	282857	221.743
E11	11	101168	15426.7	76667	293792	114.709
E12	11	88537.5	6919.69	65960.8	329232	0
F1	11	108006	17632.9	78304.5	325965	2127
F2	11	105891	17635.6	83310.4	315334	657.776
F3	11	116160	19477.4	86654.4	296675	2803.67
F4	11	99956.2	17822.8	87895.3	288694	1396.36
F5	11	111321	17468.5	89959.1	287115	422.417
F6	11	109930	17911.3	99356.1	317573	0
F7	11	105343	17387.6	97643.4	313781	0
F8	11	114276	18972.6	101551	329696	439.446
F9	11	102068	17342	95574.8	323825	667.297
F10	11	94418.2	15472.4	84677.2	304590	0
F11	11	82656.2	13060.1	65920.4	255759	0
F12	11	85296	14067.7	71720.9	312888	0
G1	11	96255.6	18647.1	74039.4	321159	0
G2	11	131256	22898.6	78961.2	307807	3108.07
G3	11	112431	19285.2	79010.9	290607	0
G4	11	117070	20084.2	85144.7	293593	415.914
G5	11	121799	20151.9	87862.3	292368	619.111
G6	11	127067	21533.3	94508.9	312039	96.7397
G7	11	135012	22659.3	98796.1	326297	248.975
G8	11	139266	23541.4	100794	337049	2234.09
G9	11	128643	21006.3	87312.5	301842	0
G10	11	129562	20225.5	81031.9	300199	0
G11	11	132638	21820	81791	331001	2167.96
G12	11	115451	17973.9	63441.1	278513	789.765
H1	11	112817	18711.2	62804.2	283185	1131.96
H2	11	115561	19946.3	74027	308668	360.775
H3	11	109893	19715.4	79749.2	309013	0
H4	11	119310	20230.6	85727.2	318278	3114.93
H5	11	120891	19843.9	80288.6	284559	0
H6	11	139741	23046.4	97405.5	342186	464.154
H7	11	128966	19191.9	78242.1	293768	0
H8	11	132488	21511.6	91751.6	327631	106.436
H9	11	123577	19824.3	86466.2	325625	0
H10	11	131513	20922.6	82961.1	324679	260.446
H11	11	143008	23049.7	86127.9	372197	591.912
H12	11	178915	26875	74244.5	335945	2508.77
A1	12	121332	19157.2	66591.5	302948	1036.83
A2	12	105110	17507.5	70643.2	283752	1316.29
A3	12	100597	15958.4	71443.3	268883	697.714
A4	12	97977.4	16926.8	78369.8	278939	0
A5	12	90890.6	14939.9	74502.5	260826	26.5776
A6	12	71383.1	13227.5	75471.4	260635	0
A7	12	91052.4	21429.6	84006.9	268370	458.951
A8	12	102307	17134.2	80607.3	277995	907.22
A9	12	121381	25846.8	86697.1	294098	525.091
A10	12	103169	15909.5	72439.3	269216	0
A11	12	108330	18548	78553.9	315474	307.816
A12	12	105024	16618	65909.6	315808	965.736
B1	12	105086	16238.1	59532.9	249281	331.363
B2	12	114790	17238.2	78859.3	306748	72.2759
B3	12	135728	21734.6	83713.4	289430	554.629
B4	12	109234	18736	90649.5	301796	168.38
B5	12	104250	17017.6	92582.2	303762	0
B6	12	86218.2	14242.9	80057	262753	0
B7	12	89522.9	14257.7	79688.2	263325	0
B8	12	93726.1	14399.5	82545	279144	0
B9	12	89956.8	14707.5	76743.6	271266	543.227
B10	12	82031.5	13415.5	73423.7	266569	0
B11	12	103562	14960.1	74420.6	303475	0
B12	12	86582.2	13746.6	66081.9	285255	0
C1	12	53452.8	12463.7	63005.3	263255	226.669
C2	12	110223	18212.7	77949.3	293696	4471.04
C3	12	98937.4	17918.4	88998.7	308795	788.13
C4	12	106609	18071.4	86296.2	275515	347.969
C5	12	94709.6	16794.9	83808.6	264567	424.311
C6	12	92437.8	16368	79775.1	248606	0
C7	12	91745.3	15471.1	76162	238479	0
C8	12	103117	18143.1	88441.4	279158	0
C9	12	95776.9	16909.1	81456.4	265043	0
C10	12	105627	17231	85124.6	294137	741.152
C11	12	104168	16367.8	80280.5	309198	684.936
C12	12	120587	18971.7	79363.2	342577	3850.72
D1	12	90163.8	13893.7	54362.9	211441	1628.41
D2	12	90700.7	15281.3	71168.4	266804	4076.81
D3	12	114396	18747.1	82608.3	280993	925.308
D4	12	101241	16950.7	85144.6	279792	342.41
D5	12	89902.5	15023.6	78322.1	245839	0
D6	12	91827.9	14576.6	77697.6	243591	0
D7	12	73067.3	12217.5	69979.2	221865	0
D8	12	95297.4	16035.4	87003.8	279315	0
D9	12	92070.4	15046.2	81918.4	274597	0
D10	12	87271.4	14499	76220.8	271003	0
D11	12	83733.2	13181.1	72941.5	286352	0
D12	12	122793	17532	78601	329285	113.446
E1	12	110253	20449.9	85664	324469	896.557
E2	12	123701	19497.2	83478.4	305386	911.133
E3	12	98763.3	16542.2	85042.4	291947	93.3026
E4	12	104851	16700.6	87857	282703	477.323
E5	12	98335.9	16349.3	89779.5	279049	0
E6	12	107459	17833.1	96110.1	295146	0
E7	12	115969	18919.3	99701.2	293903	477.491
E8	12	100833	18601	95059.9	293260	0
E9	12	108058	19447.1	94440.9	307850	194.097
E10	12	94313.9	15814.2	79278	282578	58.9317
E11	12	101899	15576.7	76645.1	293578	0
E12	12	88299.2	6583.99	65900.6	329091	0
F1	12	107005	17933.6	78322.9	325561	1508.48
F2	12	106909	17971.6	83487.3	316069	318.716
F3	12	116720	19624.1	87179.6	297247	2500.13
F4	12	100140	17881.2	88155.2	288845	1260.34
F5	12	111508	17425.8	90168.1	287962	108.949
F6	12	110712	17960.6	99367.2	317739	0
F7	12	106161	17307.9	97679.4	313299	0
F8	12	114726	18727.8	101449	329223	348.119
F9	12	102415	17129.2	95561.7	323834	973.598
F10	12	94951.2	15138.3	84816.6	305001	0
F11	12	82906.1	13223.4	65360.9	255272	0
F12	12	85813.1	14220.2	71890.7	313050	0
G1	12	98465.3	19251.4	73961.8	321162	0
G2	12	131252	23057	78923.2	308087	2431.22
G3	12	113837	19447.2	79121.9	291375	0
G4	12	117621	20084.2	85284.2	293881	598.88
G5	12	122838	20309.8	87938.4	292633	666.247
G6	12	127681	21204.7	94558.9	312019	77.5743
G7	12	135660	22985.2	98929.1	326472	863.633
G8	12	139588	23787.6	100959	337255	2910.53
G9	12	129221	21006.3	87259.9	301834	0
G10	12	131381	20391.3	80678.1	300564	0
G11	12	134690	21492.5	82106	331474	2489.91
G12	12	117059	18504.1	63334.9	279518	1296.43
H1	12	113407	18271.8	62471.1	282795	1554.67
H2	12	116932	20688	74208.4	308204	127.332
H3	12	110931	19785.9	79595.9	308825	0
H4	12	120805	20201.2	85989.9	319096	2821.74
H5	12	121187	19532.2	80434.7	284169	0
H6	12	140742	22845.5	97364.9	342475	815.815
H7	12	129775	19561.2	78812.4	294046	0
H8	12	132846	21660.4	91769.9	327251	361.702
H9	12	124826	20032.6	86400.4	325118	0
H10	12	132225	20724.1	82879.2	324088	248.097
H11	12	143631	23139.7	86452.2	373046	163.334
H12	12	178144	27182.3	74659.9	336241	2706.3
A1	13	123525	18974.6	66824.7	303197	968.402
A2	13	104988	17441.9	70779.6	283566	1508.58
A3	13	102158	15992.9	71970.8	269315	57.7281
A4	13	99414.5	16889.3	78170.4	278844	195.367
A5	13	92875	15373.5	74744.5	261042	25.6917
A6	13	71267.2	13198.1	75353.8	260324	0
A7	13	92562.8	21491	84591.6	268603	502.858
A8	13	103114	17376.8	80546.1	278195	947.541
A9	13	121118	24655.6	85484.1	295781	384.189
A10	13	102933	15995.4	72529.7	268568	146.966
A11	13	109058	18468	78820.6	315401	243.93
A12	13	106404	16312	65822.3	315894	816.341
B1	13	105888	15927.9	60069.9	250284	423.524
B2	13	115159	17216.7	78914.8	306349	901.117
B3	13	137488	22226.7	83945.2	289230	624.348
B4	13	110370	18612.2	90940.3	302895	446.31
B5	13	104567	16666.8	92562.7	304177	0
B6	13	87175.5	14168.5	79810.4	262420	0
B7	13	90374.7	14183.7	79733.9	263671	0
B8	13	94647.8	14386.8	82769.3	279919	0
B9	13	90565.6	14712.4	76760.5	271144	283.162
B10	13	82669.7	13543.2	73361.2	266355	0
B11	13	102761	14468.4	74558.9	303884	0
B12	13	86082.6	13650.9	66301.7	285008	14.2138
C1	13	54205.6	12515.5	63349.1	263166	402.966
C2	13	111833	18707	78647.7	294507	3969.11
C3	13	99947.5	18130.7	89104.6	309110	422.143
C4	13	107943	18127.2	86608.5	275670	632.85
C5	13	95418	16750.4	83973.2	264489	571.978
C6	13	92111.5	16357.7	80126.3	248840	0
C7	13	92553.5	15711.6	76375.8	238088	0
C8	13	103209	17964.9	88370.6	279818	6.76427
C9	13	97685.9	17235.5	81847.2	264717	454.077
C10	13	106376	17366.4	85207.5	293988	586.503
C11	13	104752	16756.5	80669.1	310095	651.686
C12	13	122429	19072.8	79363.2	342692	3762.99
D1	13	90617.4	14220.5	54290.5	211487	1842.17
D2	13	90889.9	15356.5	71330.3	266396	4071.68
D3	13	115409	18912.7	83043	281799	1086.27
D4	13	102130	16698.9	85469.1	280224	752.131
D5	13	90015	15195.3	78312.8	246444	0
D6	13	92474.2	14447.9	77630	243450	0
D7	13	73507.9	12370.2	70317	221351	0
D8	13	96072.3	16287.5	86783	279387	0
D9	13	92612.1	15091	82046.5	274462	0
D10	13	87688.4	14302.8	76321.2	271249	0
D11	13	85556.4	13220.6	72745.5	286582	0
D12	13	123862	17450.5	78648.2	329565	392.861
E1	13	111501	20306	85535.3	324360	1033.32
E2	13	125665	19261.5	83449.3	305499	695.619
E3	13	99088.9	16714.8	84999.7	292062	356.858
E4	13	105587	16997.4	87625.4	282551	475.291
E5	13	99697.3	16241.3	89664.2	278599	0
E6	13	108675	17575.6	95889.8	295194	0
E7	13	116648	18817.2	99618.1	293082	0
E8	13	101262	18308.5	95450.1	292605	0
E9	13	109221	19426.5	94605.4	307834	0
E10	13	94744.6	15515.7	78993.2	282827	0
E11	13	102005	15651.7	77000.1	294289	0
E12	13	89870.9	6902.95	66228.7	328882	0
F1	13	109251	18246.1	78476.1	325324	1893.97
F2	13	107697	18074.3	83663.1	315973	429.476
F3	13	117826	19812.1	87220.9	297491	2505.95
F4	13	101502	17953.5	88413.1	288616	1885.62
F5	13	112328	17619.3	90395.5	287962	482.626
F6	13	111763	17897.8	99803	318292	0
F7	13	106638	17396.1	97883.2	313575	43.5639
F8	13	116051	18916.9	101678	329746	644.664
F9	13	102297	17408.9	95838.6	323769	531.65
F10	13	94858.2	15669.9	84964.6	305533	0
F11	13	83876	12951.6	66010.3	255790	0
F12	13	86204.4	14534.6	71735.2	313362	0
G1	13	98232.5	19043	74149.4	320843	0
G2	13	132836	22822.2	78801.7	308147	2801.59
G3	13	114048	19372.5	79401.4	291963	0
G4	13	119126	19865.2	85442.9	293876	648.861
G5	13	124149	20458.6	87775	292969	909.177
G6	13	128094	21469.6	94998.4	312736	494.65
G7	13	136318	22653.6	98982.3	325874	752.761
G8	13	141911	23540.3	100870	337311	2870.87
G9	13	129962	20959.9	87612.6	301817	0
G10	13	131956	20353.6	80812.1	300754	129.067
G11	13	135778	22228.4	82063.1	331545	2388.65
G12	13	116444	18267	63670.7	279551	145.518
H1	13	115507	19049	62677.8	283129	1668.14
H2	13	119086	20400.6	74166.7	309152	1066.69
H3	13	113597	19853.3	80021.4	309734	0
H4	13	121131	20399.3	85744.9	318426	3164.1
H5	13	123703	19808.1	80480.3	283572	0
H6	13	142414	23058.9	97716.3	342181	602.171
H7	13	129951	19409	78597.2	293817	0
H8	13	134521	21760.9	91631.4	328143	638.615
H9	13	125815	20218.8	86387.8	325169	0
H10	13	132342	20852.2	83312.7	323983	0
H11	13	144051	23236.9	86264.5	372649	104.702
H12	13	179457	26963.8	74763.7	335553	2611.75
A1	14	124933	19207	67055	303927	1315
A2	14	106409	17377.5	70842.8	284184	1221.29
A3	14	103490	16226.4	72061.8	269038	730.559
A4	14	100028	17018.7	78240	279459	328.485
A5	14	94266.8	15230.4	74778.7	261317	110.74
A6	14	72400.7	13428	75450.4	260279	0.847119
A7	14	94129.7	21862.3	84870.9	269069	421.672
A8	14	103869	17262.2	80741	278745	816.06
A9	14	120487	24350.8	85036.9	295982	552.461
A10	14	103542	16037.9	72850.4	268908	301.877
A11	14	110012	18542.3	78749.7	315933	0
A12	14	107802	16038.4	65943.8	316575	1061.78
B1	14	106669	16060.2	59958.8	249738	216.422
B2	14	115513	17421.2	79313.4	306606	521.086
B3	14	137881	22092.4	83713.4	289305	737.771
B4	14	109800	18447.2	90851.8	302445	613.676
B5	14	105797	17040.4	92908	303516	0
B6	14	87285.9	14361.3	80064	263332	0
B7	14	90708.7	13986.8	79844	263252	0
B8	14	94444.2	14609.9	83007.7	279753	0
B9	14	91036.1	14541.4	76670	271109	288.295
B10	14	83079.9	13680.8	73663.4	266330	45.6235
B11	14	103237	14663.6	74684.2	303685	0
B12	14	85747.9	13702.9	65714.7	285896	0
C1	14	54235.7	12617.2	63070.6	263490	383.468
C2	14	112616	18472.8	78578.4	294912	4060.83
C3	14	100339	18176.8	89552.7	308493	723.26
C4	14	108005	18244.5	86715.2	275675	625.949
C5	14	95686.1	16978.5	83968.5	264674	308.42
C6	14	92887.9	16049	79928.7	248999	0
C7	14	93271	15612.9	76731.8	238465	0
C8	14	104539	18239.2	88390.7	278982	0
C9	14	96958.5	16617.7	81528	265040	0
C10	14	106700	17463.2	85435.8	293447	417.263
C11	14	106506	16430.1	80478.6	309543	518.689
C12	14	123129	18862.7	79718.2	343166	3634.06
D1	14	91260.1	14046.2	54554.5	211300	1910.88
D2	14	92051.9	15440.5	71586.5	266539	4050.32
D3	14	117356	18983.2	82831.2	281842	1183.77
D4	14	103015	16885.3	85319.1	280239	921.872
D5	14	89980.6	15211.6	78392	246767	0
D6	14	92418	14691.5	77699.4	243411	0
D7	14	73712.2	12568.2	70735.6	221944	0
D8	14	96458.4	16324.4	86968.2	279929	0
D9	14	92432.4	15142.5	82140.6	274861	0
D10	14	87752.1	14586.8	76046.3	271165	0
D11	14	86111.3	13090.9	72925.3	286404	0
D12	14	123697	17735.5	78471.5	329489	0
E1	14	111596	20388.4	85374.2	324862	994.381
E2	14	125872	19229.5	83667.9	306057	913.266
E3	14	99843.4	16791	84908.3	292724	429.961
E4	14	106060	17036.7	87847.8	282788	625.597
E5	14	100214	16355.1	90198.1	279225	0
E6	14	109353	17931.2	96273	295336	0
E7	14	117424	18870.4	100035	294132	0
E8	14	102285	18548.8	94989.4	292428	0
E9	14	110245	19987.3	94581.6	307555	56.7024
E10	14	95868.6	15688.7	78972.6	282706	145.831
E11	14	103168	15462	76960.4	293971	0
E12	14	89325.8	6781.86	66157.2	329764	0
F1	14	109098	17978.1	78596.2	325636	2001.81
F2	14	107782	18160.6	83641.6	316316	517.632
F3	14	118563	19681.2	87778.6	297601	2678.57
F4	14	101777	17955.5	88669	288758	1662.51
F5	14	112795	17710.4	90445	288068	206.43
F6	14	111175	18109.6	99846.5	318676	0
F7	14	107061	17573.5	97821.8	313937	128.756
F8	14	116628	19119.8	102125	329971	308.364
F9	14	102832	16955.4	95579.2	324428	519.617
F10	14	94998.3	15213.1	84991.8	304700	0
F11	14	83311.7	13060.1	65972.1	255754	0
F12	14	87251.5	14587.8	72316.3	313270	0
G1	14	99586.9	18790.2	74117	320739	0
G2	14	133892	23287.3	79160.8	308343	2607.74
G3	14	115851	19538.3	79299	291672	144.898
G4	14	119016	20086.9	85675.5	294197	554.254
G5	14	124511	20189.3	87942.1	293128	513.055
G6	14	129444	21787.3	94927	311986	323.074
G7	14	137100	23024.7	99067	327023	357.902
G8	14	141493	23905.8	101245	337335	3025.24
G9	14	130139	21151.1	87622.5	302570	0
G10	14	134163	20643.1	81051.2	300483	0
G11	14	136879	22212.5	82361.2	331528	2232.87
G12	14	118673	18565.8	63634.9	279360	355.857
H1	14	117224	18644.5	63092.9	281999	1551.83
H2	14	121187	20834.6	74601.7	309175	807.555
H3	14	116749	20467.2	79861.1	309501	0
H4	14	122257	20634.4	85989	318919	2736.15
H5	14	125105	20355.9	80735.1	284355	0
H6	14	143770	23213.7	97406.5	342566	819.596
H7	14	130926	19690.9	78711.8	294332	0
H8	14	135227	21896.9	91676.4	328157	566.455
H9	14	125815	20112.7	86428.5	325663	0
H10	14	132622	20881.1	83291.1	325209	0
H11	14	144623	23016.8	86732.4	373132	633.793
H12	14	179929	27228.4	74595.6	336655	2584.74
A1	15	125235	19491	66901.5	303539	1404.26
A2	15	106717	17806.1	70784	283890	1502.86
A3	15	104593	16122	72049.1	269249	857.959
A4	15	100260	17142.6	78270.1	279895	193.452
A5	15	94173.7	15380.4	75234.8	261583	453.592
A6	15	72802.8	13384	75411.8	260212	0
A7	15	94070.5	22122.8	85213.5	268966	406.76
A8	15	104715	17581.4	81242.1	278412	697.727
A9	15	124389	26277	87680.5	292673	648.762
A10	15	105057	16148.9	72533.5	269058	62.56
A11	15	110287	18503.4	78788	316051	256.707
A12	15	108358	16329.6	66062.7	315959	641.601
B1	15	108024	16191.5	59791.1	249726	240.238
B2	15	115911	17074.4	79251	306422	967.564
B3	15	140129	22433.8	84330.7	289272	570.238
B4	15	111246	18325.4	90817.6	302568	148.094
B5	15	106188	16991.8	92882.3	303852	0
B6	15	87784.7	14117.8	80166.7	263241	0
B7	15	91153.5	14219.5	79645.2	263086	0
B8	15	95499.5	14767.9	83307.1	280017	0
B9	15	91572.8	14565	76704.7	271149	351.6
B10	15	83055.1	13697.2	73635.4	266541	122.613
B11	15	103514	14892.5	74784.4	303982	0
B12	15	86196.7	13694.6	66106.8	284882	0
C1	15	55079.6	12543.9	63122.1	263354	324.973
C2	15	114285	18539.1	78265.9	294949	4332.96
C3	15	101619	18084.6	89300	308955	685.499
C4	15	108992	18231	86748.9	275859	433.729
C5	15	96123.8	16976.7	84161.2	264286	433.657
C6	15	93275.7	16335.6	79994.6	248758	0
C7	15	93427.1	15594.9	76477	238948	0
C8	15	105339	18181	88555.2	279351	0
C9	15	98216.7	16865.2	81868.9	264887	518.555
C10	15	107442	17035.6	85171.8	293563	300.546
C11	15	106661	16820.9	80555.9	310363	239.395
C12	15	123585	19251.4	79804	342351	3861.36
D1	15	91767.3	14271.6	54299	211512	2139.91
D2	15	92206.4	15341.4	71661.9	266893	4209.25
D3	15	118329	18924.6	83261.3	282001	1066.04
D4	15	102443	17171.7	85372.1	280121	624.337
D5	15	91058.7	15126.2	78572.7	246989	0
D6	15	92913.6	14772.3	77711.1	243502	0
D7	15	74307.7	12537.5	70357	221807	0
D8	15	97665.6	16049	86853.3	279637	0
D9	15	91808	15133.9	81746.6	274940	0
D10	15	88014	14288.4	76433.3	270513	0
D11	15	85826.5	13235.8	72621.2	286661	0
D12	15	123418	17446.2	78312.3	329291	0
E1	15	113227	20365.4	85309.4	324571	1091.25
E2	15	126956	19459.7	83716.4	305929	850.319
E3	15	100337	16834.3	85292.2	292295	132.74
E4	15	105498	16753.9	87957.9	283091	329.048
E5	15	100608	16487.2	90071.8	278930	0
E6	15	110592	18008	96508.4	294799	285.209
E7	15	117743	18974.7	100009	293949	0
E8	15	102515	18086	95260.9	292679	0
E9	15	112788	20131.3	94689.9	307623	0
E10	15	96039.4	15607.6	79301.5	283234	0
E11	15	104864	15763.1	76777.7	294333	262.344
E12	15	90246.9	6979.74	66568	329942	0
F1	15	109458	17678.7	78833.9	326139	1684.49
F2	15	108439	18194.5	83853.6	315658	741.411
F3	15	119070	19882	87888.8	297007	2604.86
F4	15	102313	17907.9	88378	289681	1838.65
F5	15	113196	17656.3	90493.6	287948	436.753
F6	15	112070	18146.4	100059	317881	0
F7	15	107772	17707.2	98214.7	313880	0
F8	15	116614	18824.4	102099	329629	906.827
F9	15	104329	17258.8	95705.1	324160	569.938
F10	15	94739.1	15385.6	84877.5	304949	0
F11	15	83762.4	13055.9	65807.7	255142	0
F12	15	87990.8	14333.7	72049.4	313986	0
G1	15	100967	19422.3	74348.6	320831	0
G2	15	135032	23277.2	79004.6	308142	3136.22
G3	15	117150	19768.2	79503.9	291381	0
G4	15	118833	20260.6	85855.1	294336	693.487
G5	15	124530	20451.3	88180.7	292897	501.271
G6	15	129883	21407.7	95052.2	312070	279.268
G7	15	138465	23240.7	99306.4	326578	357.902
G8	15	142965	24136.9	101014	337845	2864.44
G9	15	130892	21057.5	87497.3	301717	0
G10	15	136933	20950.9	81072.6	300677	150.4
G11	15	141221	22695.1	82414.5	332310	2596.36
G12	15	122624	18316.1	63439.7	279476	1267.33
H1	15	122102	19363.1	62723.8	282859	956.062
H2	15	127713	21551.3	74531.8	308683	943.823
H3	15	122107	20900.6	80161.6	309794	0
H4	15	125111	20831.5	85780.5	318911	2685.16
H5	15	129516	20368.4	80794	284359	0
H6	15	147858	23883.7	97532.3	342356	665.508
H7	15	133060	19650.2	78470.4	293439	0
H8	15	136207	21919.8	91769	328152	556.533
H9	15	127514	20468.5	86472	325524	0
H10	15	132208	21170.9	83608.6	323978	35.9235
H11	15	145560	23272.6	86957.4	373342	354.589
H12	15	182243	26759.5	74982.9	336635	2871.75
A1	16	124154	18936.4	67120	304082	679.815
A2	16	107425	18023.9	71081.2	283610	1690.57
A3	16	104852	16314.1	72112.7	269207	721.601
A4	16	101771	17226.1	78381	279976	395.523
A5	16	95591.7	15532.1	75176.9	262072	272.864
A6	16	75253.9	13358.7	75488.2	260530	0
A7	16	93881.1	22338	85528.9	269126	282.495
A8	16	105031	17504	81079.9	278649	491.74
A9	16	120076	24523.4	85788.8	295540	637.611
A10	16	105453	16143.2	72624.9	269258	107.246
A11	16	110716	18626.8	78869	316175	0
A12	16	108038	16470.4	66109.5	316456	701.626
B1	16	107993	16338	60044.2	249223	385.21
B2	16	117777	17116.3	79051.1	306616	315.916
B3	16	141553	22655.2	84221.4	289614	724.244
B4	16	111406	18480.6	91073.2	302260	746.554
B5	16	106716	16962.1	92661.4	304087	0
B6	16	87684.8	14249.7	79964	263285	0
B7	16	91963.1	14282.6	79818.2	263756	0
B8	16	96207.2	14582.8	83035.9	279554	0
B9	16	91086.1	14527.5	76734.3	271221	484.199
B10	16	83563.5	13487.6	73644.7	266476	117.861
B11	16	104037	14690.8	74673.3	303537	0
B12	16	87265.2	14050.3	66318.7	285843	0
C1	16	55449.4	12825.8	63204.6	263349	13.8113
C2	16	114026	18299.8	78460.8	295322	4006.4
C3	16	102668	18155.6	89245.6	309169	388.256
C4	16	109388	18172.4	86711.3	276491	742.267
C5	16	96790.4	17221.2	84249.1	264629	649.55
C6	16	93596.6	16326.1	79844.2	248642	0
C7	16	93390.1	15765.6	76493.9	238669	0
C8	16	105018	18282.6	88767.6	279849	0
C9	16	98333.3	17123.2	82026.7	265206	335.108
C10	16	107407	17443.4	85274.9	293928	253.859
C11	16	106956	16553.5	80375.2	310198	200.604
C12	16	124251	18910	79800.2	342552	3925.16
D1	16	92190.9	14118.3	54568.4	211463	1779.57
D2	16	92661.9	15489.1	71897.3	266733	4541.65
D3	16	118125	19211.9	83246.6	282069	1540.65
D4	16	103248	16937.2	85654.5	280294	380.455
D5	16	91539.8	15091.7	78570.8	247041	0
D6	16	93996.2	14614.9	77957.8	243662	0
D7	16	75462.1	12738.7	70204.4	221728	0
D8	16	97430.9	16209	87140.4	279711	0
D9	16	92399.2	15273.1	82166.8	275558	0
D10	16	88102.8	14437.1	76388.1	271564	0
D11	16	84790.7	13079.8	72744.5	287034	0
D12	16	124641	17595.6	78266.1	329433	227.943
E1	16	112638	20339.4	85712.2	324683	1283.1
E2	16	127255	19459.7	83414.9	306097	999.685
E3	16	101789	16360	85116.3	292644	225.08
E4	16	106530	16753.9	87814.8	283119	839.885
E5	16	101012	16193.1	90278.6	278849	0
E6	16	110186	17957.4	96286.1	295290	0
E7	16	118216	18677.1	99939.2	293918	0
E8	16	102812	18704.4	95500.4	293035	0
E9	16	116663	20347.8	94908.6	308010	549.577
E10	16	96136	15759.8	79563.9	283286	95.8889
E11	16	104997	15504.9	77064.8	294542	154.007
E12	16	91186.6	7045.69	66490.9	330246	0
F1	16	111055	17967.6	78838.8	325939	1629.96
F2	16	108550	17994.9	83656.3	316361	571.881
F3	16	120311	19791.5	87635	297607	2763.91
F4	16	102359	18080.3	88550.6	289031	1694.81
F5	16	113686	17736	90574.3	288397	0
F6	16	112821	18034.2	99679.9	318500	0
F7	16	107594	17371.5	97995.3	313243	0
F8	16	117017	18905.4	101800	329704	488.87
F9	16	104169	17188.6	95660.2	324190	107.205
F10	16	95403.8	15356.3	85145.3	305632	0
F11	16	84228.4	12948.4	65908	256201	0
F12	16	87586.5	14773.4	72030.7	313902	0
G1	16	103134	19287.5	74262	320488	0
G2	16	137575	23805.2	78935.1	308277	2751.78
G3	16	120308	19821.6	79286.6	291729	33.1466
G4	16	120070	20299.5	85975.5	294489	524.801
G5	16	125450	20370	88352.5	293810	751.454
G6	16	130008	21703.5	95255.3	311376	89.4386
G7	16	140836	23538.6	99049.3	326749	536.853
G8	16	145720	24178.8	101061	337925	2465.65
G9	16	131855	21419.2	87913.6	302329	0
G10	16	144432	21442.7	80874.3	300737	0
G11	16	148655	23602	82329.9	332377	2230.27
G12	16	126425	19254.4	63500.8	279453	617.79
H1	16	130523	20854.2	62959.3	282662	893.649
H2	16	137940	22575.5	74464.2	309286	433.377
H3	16	133173	21998.7	80219	309394	0
H4	16	129512	21142.4	85845	318770	2536.74
H5	16	136754	21374.2	80961.6	284262	0
H6	16	154014	24289.4	97831.5	342926	492.514
H7	16	134557	19859.5	78739.8	293693	0
H8	16	138253	22115.2	91805.7	328031	528.571
H9	16	129467	20346.1	86302.6	325059	0
H10	16	133591	20767.9	83641.5	324798	536.608
H11	16	145535	23308.3	86558.5	373430	0
H12	16	181105	26972.7	74776.9	336665	2174.49
A1	17	127252	19525.8	67100.8	304066	1612.52
A2	17	107303	17817.8	71009.1	284497	1132.01
A3	17	106447	16513	72375	269947	708.662
A4	17	101477	17076.9	78629.3	279589	372.538
A5	17	95695.4	15413	75661.1	262304	310.958
A6	17	75526.3	13494	75948.5	260572	0
A7	17	95123.1	22687.7	85775.2	269709	434.098
A8	17	105746	17790.3	81184.3	278605	707.369
A9	17	126431	26616.6	87487.6	293415	503.804
A10	17	105229	16032.1	72848.5	269663	47.6648
A11	17	111136	18639.4	79087.3	314840	0
A12	17	109865	16305.2	65762.9	316825	1646.02
B1	17	107870	16502.9	59991.7	249375	588.17
B2	17	118011	17582.6	79266.1	306833	579.373
B3	17	142154	22678.8	84186.4	289184	187.304
B4	17	111712	18689.8	90875.9	302351	0
B5	17	107477	17132.5	93235.8	304335	0
B6	17	88145	14257.3	80257.1	263312	0
B7	17	91435.9	14016.7	79824.2	264074	0
B8	17	96323.7	14555.7	83141.9	279566	0
B9	17	91475.3	14527.5	76677.6	271233	736.564
B10	17	83474.8	13776.5	73863	266587	0
B11	17	103838	14924.2	74843.3	303998	0
B12	17	85581.8	14125.9	65949.3	285628	0
C1	17	56748.9	13206.9	63444.7	263711	157.612
C2	17	116478	18836.5	78378.4	294780	3888.48
C3	17	103870	18476.4	89389.4	308451	114.25
C4	17	110357	18139.7	86881.3	276564	320.368
C5	17	97508.4	17040.3	84283.7	264617	312.158
C6	17	93490.1	16097.3	79751.5	248972	0
C7	17	93532.4	15593.3	76925.4	238418	0
C8	17	105598	18223.5	88794.4	279383	46.3836
C9	17	99105.9	16938	81999.5	264939	14.5304
C10	17	108139	17374.8	85390.5	293940	323.889
C11	17	107823	16549.2	80878.1	309859	106.398
C12	17	125075	19154.2	80188.5	343473	4321.26
D1	17	92632.4	14225.4	54497.6	211335	1834.53
D2	17	93895.1	15361.8	71860.1	267630	4400.66
D3	17	119388	19276.9	83437.3	282437	1387.96
D4	17	104143	16790.2	85477	280324	545.319
D5	17	92188.8	15408.8	78591.3	246987	0
D6	17	94388.3	14621.9	77902.9	243496	0
D7	17	74900.2	12573.9	70532.1	221495	0
D8	17	98362.6	16107.2	87353.3	279906	0
D9	17	93124.2	15354.1	82114.4	275358	0
D10	17	88539.6	14651.3	76447.8	271438	0
D11	17	86603.1	12825.5	72718.2	286765	0
D12	17	123996	17665.5	78540.4	329693	105.043
E1	17	113634	20716.7	85685.6	324969	1312.54
E2	17	128598	19510.4	83656.1	306097	982.615
E3	17	101078	16794.8	85234.8	292529	5.77129
E4	17	106370	16852.5	88032	282656	548.413
E5	17	101582	16478.5	90455.6	279601	0
E6	17	111564	18008	96444	294996	104.345
E7	17	119057	18854.1	100001	294467	0
E8	17	103881	18481.9	95675.7	292486	0
E9	17	125386	21034.1	94898.8	307740	0
E10	17	97247	15683.7	79268.2	283327	0
E11	17	104446	15508.1	76879	293844	0
E12	17	91851.8	7064.4	66548.2	330771	0
F1	17	111021	18335	78844.9	326704	1597.73
F2	17	109782	18034.6	83781	317083	576.402
F3	17	119933	19795.4	87770.7	297746	2957.87
F4	17	102447	18250.6	88731.2	289387	1604.78
F5	17	115462	17667.7	90801.6	288671	102.259
F6	17	112392	18309.7	100011	318689	0
F7	17	108808	17410.4	97778.9	312941	20.3298
F8	17	116789	19173.3	101980	330146	159.017
F9	17	105612	17293.4	95925	324805	1381.63
F10	17	96270.2	15494.1	85198.7	305883	0
F11	17	84103.4	13148.6	66096.2	256065	0
F12	17	88499.6	14587.8	72111.2	314134	0
G1	17	107659	20287.7	74408.2	320659	0
G2	17	139883	23645.7	78783.3	309032	2957.54
G3	17	124817	20305.6	79399.5	291687	239.603
G4	17	121368	20322.1	85778.5	294808	744.361
G5	17	126940	20739.7	88534.4	293520	650.837
G6	17	129756	21577.9	95174.6	312131	142.372
G7	17	143009	23562.7	99410.9	326825	660.368
G8	17	147469	24347.6	101347	337652	2409.9
G9	17	134208	21373.8	87727.8	302454	0
G10	17	155962	22653.4	80970.8	301743	0
G11	17	160533	24371	82335.1	331931	2300.38
G12	17	134001	20192.6	63364.1	279386	735.527
H1	17	145763	22756.1	62995.2	283273	1594.38
H2	17	156459	24822	74618.6	309251	814.257
H3	17	152768	24184.4	80055.7	309763	0
H4	17	136429	21817.3	86146	317804	2779.85
H5	17	149989	22628.6	81052.9	284966	0
H6	17	162784	25272.8	97774.3	342542	674.016
H7	17	138286	20265	78807.1	294179	0
H8	17	143033	22566.4	91696.5	327832	550.219
H9	17	133025	20667.2	86396.5	326303	0
H10	17	134404	20731	83344.6	324905	142.571
H11	17	147142	23698.3	86637.2	374379	50.2567
H12	17	182265	27565.9	74940.1	337422	3059.15
A1	18	125688	19710.1	67156.9	304281	1648.22
A2	18	108909	17923.2	71265.3	283578	1246.47
A3	18	107576	16453	71945.4	269940	266.744
A4	18	103031	17172.6	78624.6	279949	245.167
A5	18	96269.6	15360.7	75520.7	261912	340.194
A6	18	76404	13578.8	75956.1	261074	0
A7	18	95246.1	22786.5	86069.2	269587	234.446
A8	18	105844	17753.3	81338.7	278962	966.825
A9	18	122505	25091.6	86067.8	295274	794.733
A10	18	106891	16249.4	72772.7	269384	0
A11	18	111791	18509.1	78831.9	315521	166.105
A12	18	110100	16363.4	65960.2	316344	1073.78
B1	18	109942	16245.7	60453.6	249643	331.363
B2	18	117856	17092.3	79482.2	306979	48.9611
B3	18	143513	22967.9	84344.1	289705	811.652
B4	18	111607	18377.4	90819.6	302277	300.245
B5	18	107872	16930.4	93116.6	303874	0
B6	18	89020.7	14332.6	80330.8	263541	0
B7	18	91959.7	14219.5	80095.3	263451	0
B8	18	96326.6	14568.3	83026.5	280047	0
B9	18	92156.2	14193.7	76733.4	271523	388.386
B10	18	83492.9	13582.4	73838.7	267048	0
B11	18	103527	14789	74721.3	304166	0
B12	18	88044.9	13682.8	66205.4	286187	97.1274
C1	18	59698.2	13301.7	63273.2	263794	242.105
C2	18	118868	19120.4	78211.6	295080	4201.94
C3	18	106604	18678.1	89085.2	308942	337.908
C4	18	110426	18270.4	87376.5	276748	293.753
C5	18	97659.8	17217.5	84137.8	264864	514.967
C6	18	93596.6	16272.2	80020.6	248758	0
C7	18	94724.3	15638	76470.6	238861	0
C8	18	107275	18119.1	88844.1	279534	351.742
C9	18	99549.6	17099.5	82004	264487	101.713
C10	18	108619	17464.1	85528.2	294080	457.141
C11	18	109111	16800.5	80497.1	309587	381.259
C12	18	125109	19260.6	79538.7	342427	3693.87
D1	18	93331.9	14050.2	54461.4	211516	2070.44
D2	18	93936.8	15566.9	72025.4	267156	4099.02
D3	18	120752	19505.6	83494.4	282226	892.195
D4	18	105697	16965.1	85624.1	280465	690.672
D5	18	93357.5	15244.3	78685.4	247433	0
D6	18	95566.2	14646.2	78222.6	243829	0
D7	18	76045.7	12572.2	70295.3	222006	0
D8	18	99104	16403.9	87157.3	280447	0
D9	18	93699.1	15162.5	82229.8	275264	0
D10	18	88727.4	14352.9	76496.6	271070	0
D11	18	86092.6	13391.8	72943.5	286639	0
D12	18	124109	17633.8	78396.5	330304	136.556
E1	18	113631	20796.9	85661.1	325659	1089.36
E2	18	128615	19554.4	83907	306166	720.158
E3	18	102770	17039.7	85665.3	292557	0
E4	18	107750	16767	87980.6	282772	505.759
E5	18	102453	16534.4	90314.4	278879	0
E6	18	111608	18051.7	96651.2	295193	0
E7	18	118383	19079	99986.4	294527	0
E8	18	103792	18626.1	95269.5	293016	0
E9	18	137807	21769.1	94881.5	307431	0
E10	18	97493.8	15536.5	79231	282943	221.743
E11	18	105137	15562.8	77145.2	294530	81.7832
E12	18	92285.5	7151.03	66592.4	330178	0
F1	18	110945	18067	78857.2	325843	1352.31
F2	18	109283	18415	83862.7	316179	891.728
F3	18	120159	19677.3	87660.6	297625	2769.73
F4	18	103421	18094.1	88665	289740	1738.84
F5	18	115200	17759.7	90771.5	288650	0
F6	18	114261	18114.1	100193	318924	78.3477
F7	18	108932	17576.4	98053.8	313364	0
F8	18	117302	19024.1	101739	329409	250.345
F9	18	105005	17261	96189.9	324666	1109.24
F10	18	95597.1	15356.3	84969	305176	0
F11	18	84796.8	12993.7	66143.7	255846	0
F12	18	88908.6	14612.6	72349.3	314676	22.3894
G1	18	115041	20797.6	74340.9	321256	0
G2	18	147190	24655.7	78972	308746	3001.94
G3	18	130646	21021.5	79584.3	291238	0
G4	18	122711	20386.4	85766.7	294915	694.38
G5	18	128009	20956.1	88494.5	293382	567.443
G6	18	132461	21490.5	95163.5	311934	0
G7	18	147143	23845.2	98990.2	326784	70.0243
G8	18	153368	24703.4	101605	337784	2820.48
G9	18	138261	21947.4	87870.9	302428	0
G10	18	180450	25153.3	81282.8	300941	0
G11	18	184138	26963.1	82626.7	332122	1966.74
G12	18	150858	22063.5	63589.8	280401	850.618
H1	18	173911	25952.3	63134.5	283376	1354.66
H2	18	192664	28990.6	74540.8	309872	413.272
H3	18	186762	27717.1	80413.6	309834	0
H4	18	149233	22817.3	86087.1	318626	2907.33
H5	18	174389	24922.9	81210.5	284605	0
H6	18	182967	27104.1	98484.9	342908	799.744
H7	18	144950	20780.4	78687.3	293756	0
H8	18	150522	23208.4	92057.1	328294	191.224
H9	18	140817	21472.5	86614.3	325051	0
H10	18	134257	21063.5	83833.8	324992	763.375
H11	18	146645	23144	86931.1	374481	80.9692
H12	18	181653	27766.7	75264.8	337987	3396.8
A1	19	128888	19838	67111.1	303875	886.586
A2	19	109815	18257	71158.8	283327	1475.39
A3	19	108811	16748.5	72328	270100	743.498
A4	19	103146	17374.3	78844.6	280090	0
A5	19	97285.1	15429.2	75412.9	261802	344.623
A6	19	76309.2	13585.3	76109.8	260840	147.399
A7	19	95763.9	23126	86283.3	269529	196.338
A8	19	105816	17474.5	81100.6	278839	689.838
A9	19	126786	27054.5	87852.7	293298	563.612
A10	19	108206	16218.5	72728	269562	9.93016
A11	19	113137	18848.5	79170.6	315932	120.803
A12	19	110438	16623.4	65870.4	316322	1039.1
B1	19	110100	16574.5	60175.8	249347	705.182
B2	19	118602	17060.1	79032.6	306150	425.495
B3	19	144017	23232.4	84499.7	289917	397.502
B4	19	112022	18597.5	91084.2	302953	452.396
B5	19	108228	17127.6	93029.2	304131	0
B6	19	88713	14177	80249.2	263918	0
B7	19	91404.2	14418.9	79805.3	263952	0
B8	19	96862.8	14717.3	83355.9	280683	0
B9	19	91700.9	14481.9	76850.2	271371	584.289
B10	19	83520.6	13633.4	73841.5	266959	0
B11	19	104544	14822.8	74928.2	304409	0
B12	19	86954.1	14059.7	66260.9	285704	0
C1	19	63501.1	13613.8	63339.3	264542	136.489
C2	19	123302	19117.3	78367.4	295059	4085.02
C3	19	111782	19135.3	89289.3	309494	704.863
C4	19	111761	18234.9	87069.1	276748	386.413
C5	19	98838.2	17113.9	84265	264812	991.616
C6	19	94665.7	16238.2	79923.1	248731	0
C7	19	95350.3	15431.9	76469	238568	0
C8	19	107357	18363.9	89140.7	279996	0
C9	19	100133	17213.6	82114.7	265608	273.354
C10	19	110055	17605.1	85504.2	294102	381.275
C11	19	109442	16737.1	80583.1	309534	465.49
C12	19	127855	19444.4	79915.5	342801	4107.26
D1	19	94043.6	14504.4	54900.9	211273	1880.34
D2	19	95655	15627.1	72041	267866	4258.81
D3	19	122183	19472.7	83529.4	282343	1146.06
D4	19	106945	17041	85756.4	280424	465.326
D5	19	94795.8	15321.6	78649.1	246840	0
D6	19	97230.2	14901.9	78304.5	243314	0
D7	19	76193.1	12739.5	70435.4	221899	0
D8	19	99318.8	16353.5	87131.5	279709	0
D9	19	94024.4	15302.6	81938.8	275273	0
D10	19	87886.5	14345.8	76412.5	271850	0
D11	19	85921.1	13108.1	72932.4	287190	0
D12	19	124526	17789.5	78496.2	330040	445.382
E1	19	114601	20490.5	85830	325513	968.738
E2	19	128975	19427.8	83633.5	306390	1096.77
E3	19	102334	16746.6	85662.4	292516	233.737
E4	19	107814	16937	88084.5	282915	896.757
E5	19	102146	16426.4	90032	279212	0
E6	19	111331	17916.6	96584.8	294947	53.663
E7	19	119633	18989.9	100067	294154	0
E8	19	103963	18516.4	95669.3	292752	0
E9	19	165226	24948.4	94806.8	307862	137.394
E10	19	97156.9	15776.6	79233	283308	156.818
E11	19	105340	15886.4	77225.6	294776	122.144
E12	19	93012.3	7305.59	66732.5	330301	0
F1	19	112069	17978.1	78821.6	325965	1225.88
F2	19	110655	18064.9	83760.6	316960	438.518
F3	19	120318	20041.5	88019.6	297588	2968.54
F4	19	104475	18431.9	88715.1	289101	1559.77
F5	19	117154	17792.9	90940.6	289032	166.291
F6	19	114423	18054.9	100291	318958	249.619
F7	19	110136	17553.6	98011.9	313539	0
F8	19	117660	18610	101685	329609	738.14
F9	19	104933	17566.6	96137.4	325187	1068.77
F10	19	95670.3	15139.4	84999.4	305536	0
F11	19	84834.7	13126.5	65924.5	256196	0
F12	19	88860.4	14538.2	72201.6	314183	0
G1	19	126458	22189.5	74246.4	321019	0
G2	19	159804	25940.9	79039.3	308229	2523.27
G3	19	144885	22590.9	79844.6	290900	0
G4	19	125701	20673.2	85825	295239	666.712
G5	19	130898	20959.7	88460.1	293566	800.402
G6	19	133665	21653.5	94870.5	312067	432.591
G7	19	155390	24755.4	99271	326633	232.442
G8	19	162656	25649.4	101410	337944	3088.49
G9	19	146985	22973.3	87932.5	302021	0
G10	19	220396	29057.7	81637.6	301328	314.668
G11	19	227021	31630.2	82340.3	331894	2509.38
G12	19	177847	25108.2	63490.2	279814	616.467
H1	19	222512	32195.7	62950.7	283646	1529.13
H2	19	252221	35896.9	74680.5	309862	495.926
H3	19	248351	34416.5	80396.5	309682	0
H4	19	173412	25424.8	85915.1	318164	2780.76
H5	19	217533	29003.6	81179.8	284302	0
H6	19	218770	30017.8	97933.1	342720	1076.72
H7	19	157900	21926.1	78257	291279	0
H8	19	165505	24590.1	92027.7	328236	128.084
H9	19	153448	23014.7	86613.4	325023	0
H10	19	134919	20944.6	83594.9	325380	998
H11	19	147813	23502.6	86971.2	374474	473.251
H12	19	183071	28045.5	74964.8	336835	3190.83
A1	20	130334	19745	66891.2	304754	725.929
A2	20	111685	18497.1	71056.8	283569	1291.11
A3	20	111756	16689.4	72519.8	269769	877.865
A4	20	102598	17109.7	78820.2	280121	149.398
A5	20	96879.7	15390.7	75448.8	261836	12.4029
A6	20	77561.5	13773.6	75936.8	261556	0
A7	20	96377.8	23223.2	86487.6	269556	87.8138
A8	20	106606	17498.9	81110.1	279272	672.307
A9	20	122957	25587.4	86315.2	295896	393.312
A10	20	109280	16411.5	72622	269393	293.933
A11	20	113238	18737.7	78972.6	315054	59.2401
A12	20	112409	16674.9	66110.8	316355	940.392
B1	20	109830	16704.7	60246.8	249496	306.511
B2	20	120171	17391.3	79542.3	306378	0
B3	20	145270	23368.8	84481.2	289358	458.896
B4	20	112716	18485.5	91039	302510	189.682
B5	20	109024	17343.6	92938.8	304131	0
B6	20	89513.4	14198.1	80439.6	263879	0
B7	20	91385.3	14264.3	80060	263945	0
B8	20	97217.1	14728.2	83478.8	279970	0
B9	20	92268.9	14492.5	76723.3	271458	420.894
B10	20	83962.3	13497.6	74126	266982	0
B11	20	104622	14797.7	74917.4	304922	0
B12	20	87078	13694.6	65987.8	285882	0
C1	20	72204	14621.6	63332.8	263658	199.858
C2	20	133267	20442.5	78474.9	295372	4011.44
C3	20	122336	19982.4	89301	309632	753.274
C4	20	113557	18145.4	87489.2	277303	740.296
C5	20	99188.9	17179.3	84218.2	265019	488.798
C6	20	95900.6	16415.5	80258	248949	0
C7	20	97216.6	15863.6	76816.9	239085	0
C8	20	109785	18508	89040.3	279676	187.467
C9	20	101381	17115.3	82368.5	265541	273.354
C10	20	113930	17845.7	85560	294021	287.902
C11	20	113188	16745.7	80468.8	309131	161.813
C12	20	131195	19825.2	80030.9	342588	4156.44
D1	20	94853.4	14565.2	54637.6	211441	2035.32
D2	20	98694.9	16212.5	72062.7	267563	4199.85
D3	20	124797	19808.5	83574.5	282846	1117.54
D4	20	110768	17380.3	85804.5	280866	411.672
D5	20	96888.9	15575.9	78890.3	247055	0
D6	20	100464	15154.2	77730.9	243516	0
D7	20	77482.9	12716.9	70502.9	221511	0
D8	20	101327	16379.7	87279.1	280171	0
D9	20	96075.4	15312.1	81978.5	275202	0
D10	20	88743.8	14524.9	76529.1	271539	0
D11	20	87058.4	13037.2	72957.7	286704	0
D12	20	124731	17701.6	78414	330426	259.456
E1	20	115764	20816.7	85679.7	324801	1084.61
E2	20	129586	19619.4	83805.8	306192	960.21
E3	20	103335	16939.4	85334.9	292391	221.233
E4	20	107316	16873.6	88188.5	283364	640.831
E5	20	102119	16558.6	90461.5	279830	0
E6	20	111449	17949.7	96724.6	294979	1.98752
E7	20	120019	18736.8	100028	294983	0
E8	20	104797	18739.9	95792.2	293096	0
E9	20	213801	29925.7	95056.9	308318	424.177
E10	20	98139.3	15810.2	79371	283020	336.61
E11	20	106192	15918.5	77302.9	294708	28.6772
E12	20	94750	7382.38	66791.7	330539	0
F1	20	112700	18193.8	78707.7	326636	1845.63
F2	20	109986	17984.4	83892.2	317113	578.662
F3	20	121499	19836.7	87855.3	297128	2719.3
F4	20	106913	18414.1	88767.3	289373	1760.37
F5	20	118842	17728.4	90692.8	288940	129.019
F6	20	115249	18441.6	100438	319665	0
F7	20	110472	17657	97843.2	313370	0
F8	20	118674	19240.6	101831	329528	556.56
F9	20	106426	17796.6	96488.7	325822	1114.71
F10	20	96111.3	15388.9	85238.9	305476	0
F11	20	84638	12962.1	66145.8	256225	0
F12	20	90248.3	14542.9	72219.2	314916	39.1814
G1	20	151908	25017.9	74342.2	320630	0
G2	20	183815	28302.5	79044.7	308779	2757.19
G3	20	170438	24862.6	79605.3	291590	167.627
G4	20	130447	21159	86160.6	294764	752.393
G5	20	136500	21391.5	88922.5	294058	1152.11
G6	20	139414	22253.4	95312.8	312474	677.178
G7	20	171246	25799.6	99252.3	327152	351.094
G8	20	180367	27165.1	101678	338228	2714.35
G9	20	162117	23856.4	88235.6	302938	0
G10	20	292823	36223.9	81550.8	300887	0
G11	20	299462	39866.6	82445.8	331557	1836.92
G12	20	229306	31050.5	63563.2	279864	965.71
H1	20	296787	41538.6	63141.7	283437	1100.75
H2	20	345715	46273.1	75131.2	309727	598.685
H3	20	340957	44227.5	80612.2	309799	0
H4	20	218460	29727.9	86011.4	318483	2788.05
H5	20	288795	35363.5	81402.2	284397	0
H6	20	282779	36274	98043.5	342660	540.725
H7	20	180567	24285.9	78074.2	291116	0
H8	20	191002	26976.4	92087.4	328270	39.688
H9	20	180880	25182.8	86694.7	325349	0
H10	20	136418	21309.4	83442.4	325032	821.75
H11	20	149709	23589.8	86678.6	374511	429.974
H12	20	184989	27432.7	75052.1	337765	2196.44
A1	21	135150	20439	67037.3	303377	828.571
A2	21	116076	18502.9	70982.5	283877	1682.56
A3	21	116541	17205.6	72273.2	269535	918.673
A4	21	103275	17379.9	78726.1	280053	0
A5	21	97686.6	15402.7	75734.7	262286	371.201
A6	21	78283.8	13618.7	76075.4	260559	0
A7	21	95992.8	23443.9	86472.8	269679	37.2794
A8	21	106451	17621	81368.9	279235	781.875
A9	21	123599	25652	86367.6	295141	386.216
A10	21	110810	16435.7	73126.5	269647	127.106
A11	21	116845	19297.7	78680	315639	41.8165
A12	21	115325	16768.3	66203.2	316178	999.084
B1	21	111493	16482.3	60205.7	249670	492.903
B2	21	119369	17956.9	79460.2	305937	587.533
B3	21	148384	23796.2	84529.6	289301	678.458
B4	21	111976	18630.9	90839.7	302161	61.8747
B5	21	109540	17065.2	93125.8	304425	0
B6	21	89581.8	14190.5	80345.7	263938	0
B7	21	92293.7	14168.8	79941.3	264185	0
B8	21	97378.2	14600.9	83093.1	280272	0
B9	21	92438.5	14570.7	76852.8	271337	335.346
B10	21	83584.5	13541.3	73560.8	267471	0
B11	21	104803	14502.2	74870.5	304722	0
B12	21	87178.4	13647.4	66322.1	286067	0
C1	21	87724.5	16689	63128.6	263559	206.358
C2	21	151039	22301.2	78539.2	295055	4170.69
C3	21	142643	21911.8	89265	309376	124.9
C4	21	115450	18740.6	87549.5	276987	193.206
C5	21	101265	17046.7	84423	264672	412.161
C6	21	96575.9	16543.8	80161.2	248748	0
C7	21	99928.1	15996.7	76857.1	238863	0
C8	21	114310	18835.9	88830.8	279569	0
C9	21	105998	17638.3	82208	265491	168.916
C10	21	120094	18590	85560	293835	548.57
C11	21	118242	17310.5	80213	309035	415.616
C12	21	137713	20471.2	79691.2	342583	4092.64
D1	21	97433.2	14838.6	54693.1	211449	2134.56
D2	21	103505	16334.5	71962.2	267291	3893.09
D3	21	130966	20219.3	83967.8	282539	1445.91
D4	21	117493	17962.6	85532.9	280491	660.431
D5	21	103754	16002.9	78782.3	247290	0
D6	21	106303	15766.5	78105.5	243407	0
D7	21	80298.2	12671.6	70422.9	221926	0
D8	21	105059	16771.4	87389	280433	0
D9	21	100017	15581.9	82237.6	274642	0
D10	21	88772.2	14575.1	76698.2	270999	0
D11	21	87143.1	13128.4	73107.2	286776	0
D12	21	124503	17615.7	78466.4	330371	212.187
E1	21	116046	20557.2	85976.4	325646	1019.07
E2	21	129526	19371.6	83981.3	306649	1094.64
E3	21	103542	17033.9	85497.2	293101	0
E4	21	108693	16808.2	87950.7	283100	559.585
E5	21	102716	16685.9	90286.6	279535	0
E6	21	112689	18189.6	96797.1	295388	58.6318
E7	21	120087	18917.1	100404	294616	0
E8	21	104068	18637.6	95718.5	293080	28.8287
E9	21	294596	37286.7	94839.3	307792	0
E10	21	99201.4	16018.8	79259.4	282738	0
E11	21	107192	15989.2	77525.3	294476	445.028
E12	21	98064.3	7674.76	66427	330425	0
F1	21	111973	18204.2	79065.5	326829	1643.59
F2	21	111209	18182.8	83939.8	316787	109.629
F3	21	121971	19861.4	88075.7	297946	3236.2
F4	21	109717	18561.6	88793.4	289980	1604.78
F5	21	120871	18306.1	91212.7	288812	337.36
F6	21	116328	18230.7	100083	319209	0
F7	21	111391	17599.1	97974.9	314386	69.7023
F8	21	119054	19164.9	102218	330030	376.054
F9	21	108489	17606.5	95897.7	325787	969.222
F10	21	96022.5	15157.8	84950.5	305711	0
F11	21	84357.4	12935.8	66133.4	256363	0
F12	21	91069.8	14844.3	72487.1	314185	36.9425
G1	21	194773	30513.6	74555.7	320493	0
[truncated: 10,775 more rows]

## Sheet: Multicomponent Data
Block Type	96fast
Chemistry	SYBR_GREEN
Experiment File Name	S:\LQW\ZHB\2014-3.eds
Experiment Run End Time	2012-05-24 01:54:34 AM CST
Instrument Type	sds7500fast
Passive Reference	ROX
Well	Cycle	SYBR	ROX
A1	1	108322	339287
A2	1	93716.3	320002
A3	1	94913.5	303884
A4	1	95634.2	310671
A5	1	90348.5	286879
A6	1	67225.4	290413
A7	1	85192.6	303276
A8	1	95566.3	311507
A9	1	98529.5	328487
A10	1	92855.9	307086
A11	1	98451.6	355335
A12	1	99952.1	355210
B1	1	93163.1	278833
B2	1	105880	340131
B3	1	119476	325970
B4	1	99033.8	346210
B5	1	96113.2	336423
B6	1	80027.1	296227
B7	1	85407.9	300753
B8	1	89646	307864
B9	1	86216	305126
B10	1	79717.5	281222
B11	1	99140.9	352682
B12	1	79613.8	339561
C1	1	44086	295620
C2	1	102501	327999
C3	1	89830.1	351414
C4	1	103451	309342
C5	1	90978.4	296778
C6	1	84580.8	278057
C7	1	86924.2	265093
C8	1	98309.3	311185
C9	1	92819.4	294463
C10	1	96397.9	303119
C11	1	100292	356315
C12	1	112554	387563
D1	1	88113.2	269256
D2	1	83721.4	302409
D3	1	102206	312585
D4	1	93251.1	313440
D5	1	82724	273256
D6	1	86094.6	278011
D7	1	70042	245320
D8	1	92178	308800
D9	1	86489.4	308349
D10	1	87976.9	329511
D11	1	83532.3	328850
D12	1	117942	347728
E1	1	101860	364831
E2	1	114021	340638
E3	1	90250.5	330482
E4	1	100967	314652
E5	1	95807	315787
E6	1	109771	329745
E7	1	111873	331212
E8	1	98217.1	330563
E9	1	104709	353164
E10	1	87650.8	317723
E11	1	97858.7	326372
E12	1	76962.6	341738
F1	1	100539	363668
F2	1	97695.9	328741
F3	1	106405	337140
F4	1	88732.5	293942
F5	1	106834	320494
F6	1	107098	355959
F7	1	103255	347559
F8	1	111413	362716
F9	1	100660	361883
F10	1	88815.4	341342
F11	1	83115	291223
F12	1	84730.3	338769
G1	1	90073.1	350332
G2	1	123915	337760
G3	1	108463	325562
G4	1	105366	314747
G5	1	120992	326533
G6	1	123903	348008
G7	1	131250	357240
G8	1	136834	365896
G9	1	126870	334354
G10	1	126675	324955
G11	1	130079	353508
G12	1	110016	295056
H1	1	101863	295153
H2	1	110502	328594
H3	1	104830	329770
H4	1	117258	336766
H5	1	118883	309733
H6	1	136585	361207
H7	1	127594	312376
H8	1	130843	346816
H9	1	123653	339472
H10	1	128071	330195
H11	1	141901	380189
H12	1	165247	360128
A1	2	111171	336835
A2	2	96912.7	317226
A3	2	97366.5	301150
A4	2	97374.4	308012
A5	2	91170.1	284257
A6	2	69081.4	288129
A7	2	87288.9	299982
A8	2	97348.1	310960
A9	2	109201	324678
A10	2	93391.1	304079
A11	2	100353	352537
A12	2	101516	352494
B1	2	94141.7	274122
B2	2	108656	339830
B3	2	124123	323909
B4	2	102813	344410
B5	2	99096.5	334214
B6	2	82666.3	294499
B7	2	86268.4	297460
B8	2	91194.8	306760
B9	2	87043.5	301318
B10	2	80352.5	275990
B11	2	101008	350781
B12	2	80372	329218
C1	2	45235.6	293818
C2	2	104538	325808
C3	2	92380.4	349150
C4	2	105642	309810
C5	2	92625.8	296521
C6	2	85010	273476
C7	2	88271.3	263579
C8	2	100472	310739
C9	2	93421.7	293012
C10	2	99660.3	301882
C11	2	101413	355175
C12	2	113860	385159
D1	2	89531.5	266744
D2	2	85195.4	299196
D3	2	104052	310020
D4	2	95764.4	310901
D5	2	84457.1	273953
D6	2	88099.8	276596
D7	2	71694.4	246209
D8	2	94802	309206
D9	2	86302.3	302992
D10	2	87915.7	325035
D11	2	86200.5	327523
D12	2	118592	343096
E1	2	106374	363353
E2	2	117015	339159
E3	2	93847.8	328471
E4	2	103823	314571
E5	2	98580.3	314497
E6	2	110979	330599
E7	2	115118	330053
E8	2	100128	328501
E9	2	105044	351020
E10	2	88066.5	311841
E11	2	98586.5	324727
E12	2	78360.5	333862
F1	2	103186	361978
F2	2	99637.8	322989
F3	2	109598	334079
F4	2	88704.9	292420
F5	2	108650	319146
F6	2	108850	353900
F7	2	106045	345034
F8	2	112547	361563
F9	2	101411	359719
F10	2	89953.3	334732
F11	2	84109.5	287239
F12	2	86229.2	337569
G1	2	91340.9	346134
G2	2	128223	334251
G3	2	110420	320859
G4	2	112846	317638
G5	2	123035	322824
G6	2	126487	344734
G7	2	133370	355403
G8	2	139470	362866
G9	2	128523	330856
G10	2	127750	320713
G11	2	130492	352114
G12	2	109679	290674
H1	2	102603	292199
H2	2	112124	326500
H3	2	106474	326548
H4	2	117638	333368
H5	2	120915	306438
H6	2	136670	357548
H7	2	127519	309529
H8	2	130579	339621
H9	2	123143	333481
H10	2	128583	329609
H11	2	141849	377711
H12	2	164483	353575
A1	3	111546	331943
A2	3	99152	314505
A3	3	98180.4	299166
A4	3	99172.8	305964
A5	3	92773.2	282908
A6	3	71233.1	286196
A7	3	89443.3	298882
A8	3	99428.6	309064
A9	3	118827	321348
A10	3	96415.1	300448
A11	3	101264	348246
A12	3	100977	348728
B1	3	94295.8	270058
B2	3	109316	334648
B3	3	124419	320511
B4	3	104067	340174
B5	3	101987	332841
B6	3	83051.5	291472
B7	3	85850	293498
B8	3	92954.1	304697
B9	3	87518.9	298461
B10	3	80863.1	273889
B11	3	100419	346092
B12	3	81367	323862
C1	3	46683.3	290769
C2	3	104547	321037
C3	3	95062.1	344609
C4	3	106798	307416
C5	3	93676.6	295098
C6	3	87303.2	270196
C7	3	88978	259613
C8	3	100975	306899
C9	3	94628.7	290121
C10	3	100330	301740
C11	3	103455	351747
C12	3	114755	380730
D1	3	90147.3	262287
D2	3	85206.2	294177
D3	3	105670	306372
D4	3	96138.3	305811
D5	3	86489.5	270033
D6	3	88765.1	272805
D7	3	73296	245123
D8	3	95011.4	305427
D9	3	88907.8	299506
D10	3	88666.5	320344
D11	3	86866.2	325191
D12	3	118135	337073
E1	3	106833	358796
E2	3	118520	335387
E3	3	94480.7	324228
E4	3	104468	310786
E5	3	98151.6	311000
E6	3	111031	325720
E7	3	114823	325016
E8	3	100938	326304
E9	3	104536	344520
E10	3	89326.9	307733
E11	3	99613.9	322602
E12	3	79122.5	332167
F1	3	104095	358295
F2	3	100769	321029
F3	3	111416	330348
F4	3	90005.7	291117
F5	3	110165	317159
F6	3	110238	350160
F7	3	106279	341763
F8	3	113664	355921
F9	3	102038	356008
F10	3	90494.9	331914
F11	3	83705.6	283469
F12	3	87108.9	335228
G1	3	93246.7	341350
G2	3	129883	330392
G3	3	112456	317246
G4	3	114524	314954
G5	3	124281	320066
G6	3	126323	340254
G7	3	134528	348736
G8	3	141187	358110
G9	3	129775	323285
G10	3	126344	310911
G11	3	132599	349844
G12	3	111279	286806
H1	3	103821	284648
H2	3	111440	316494
H3	3	106865	315933
H4	3	118804	328090
H5	3	123461	302119
H6	3	136315	348218
H7	3	126923	301390
H8	3	130187	334179
H9	3	123594	331555
H10	3	129668	327489
H11	3	140891	376972
H12	3	168029	345482
A1	4	112650	327246
A2	4	99466.6	310504
A3	4	100468	294991
A4	4	100783	303151
A5	4	93160.4	280017
A6	4	72395.3	283853
A7	4	90114.6	295641
A8	4	99597.6	305832
A9	4	118097	318972
A10	4	95528.4	295969
A11	4	101966	342920
A12	4	101589	343006
B1	4	94729.5	268261
B2	4	109126	329676
B3	4	126109	314681
B4	4	103457	335048
B5	4	102689	328465
B6	4	83340.5	286996
B7	4	86051.2	288381
B8	4	93783.5	301129
B9	4	88340.2	294710
B10	4	80373.4	272383
B11	4	99680.8	338826
B12	4	79840.8	317684
C1	4	47413.6	286990
C2	4	104923	318519
C3	4	96002.4	339711
C4	4	108068	303099
C5	4	94797.9	290913
C6	4	89624.8	267101
C7	4	88907.8	254680
C8	4	101054	301349
C9	4	94262.7	285697
C10	4	101042	300682
C11	4	102413	345502
C12	4	115667	374649
D1	4	89546.5	255548
D2	4	84664.6	289005
D3	4	106388	300637
D4	4	96674.3	301279
D5	4	85923.6	265765
D6	4	88520.6	268592
D7	4	74187.2	243773
D8	4	95290.1	300580
D9	4	89743.2	293472
D10	4	88659.9	313085
D11	4	87038.9	320912
D12	4	117060	334652
E1	4	108639	354605
E2	4	120135	329978
E3	4	96072.8	319496
E4	4	104437	306183
E5	4	99090.4	306925
E6	4	110949	321877
E7	4	115152	319637
E8	4	102096	322968
E9	4	105293	338036
E10	4	90080.7	301634
E11	4	99886.8	316524
E12	4	79614.7	331832
F1	4	105186	352360
F2	4	100298	320072
F3	4	111146	324624
F4	4	91265.7	291954
F5	4	110992	312819
F6	4	108883	344704
F7	4	107580	337536
F8	4	113822	349647
F9	4	101724	348494
F10	4	92973.6	325056
F11	4	82113	278219
F12	4	86827.4	329793
G1	4	92724.2	336942
G2	4	130862	325825
G3	4	112803	310945
G4	4	115882	310299
G5	4	124796	316351
G6	4	126481	333759
G7	4	133525	341242
G8	4	139549	348798
G9	4	128720	315902
G10	4	125454	307020
G11	4	131664	340606
G12	4	109540	281755
H1	4	104046	283673
H2	4	110993	314577
H3	4	105621	314067
H4	4	117465	325232
H5	4	123439	296995
H6	4	135616	347111
H7	4	126492	299805
H8	4	129579	333450
H9	4	123147	332165
H10	4	128173	328456
H11	4	139947	377542
H12	4	168533	339256
A1	5	114247	320519
A2	5	100316	304596
A3	5	100251	290807
A4	5	100464	299380
A5	5	93547.4	277154
A6	5	74093.5	280234
A7	5	91770.5	291190
A8	5	100780	301330
A9	5	117699	315611
A10	5	96950	290225
A11	5	102100	336280
A12	5	100620	336408
B1	5	94573.4	264262
B2	5	109279	324526
B3	5	127344	310867
B4	5	105087	329696
B5	5	103141	324460
B6	5	83658.9	282422
B7	5	87721.1	282759
B8	5	92581.8	298118
B9	5	87479.5	289143
B10	5	78680.2	272006
B11	5	99176.3	332022
B12	5	81141.7	313495
C1	5	47923.9	282912
C2	5	105700	312421
C3	5	96126.3	333839
C4	5	107829	298778
C5	5	94618.1	286442
C6	5	90984.8	263815
C7	5	88873.6	250287
C8	5	100381	296649
C9	5	94699.8	281485
C10	5	100336	300182
C11	5	102818	336265
C12	5	114912	365662
D1	5	90394.2	250038
D2	5	85192.2	282410
D3	5	106962	296304
D4	5	97006.3	296456
D5	5	85905.8	261284
D6	5	88819.2	262827
D7	5	74375.9	240398
D8	5	94872.2	296934
D9	5	90323.2	289214
D10	5	87564.4	306816
D11	5	86987.6	313862
D12	5	117575	334132
E1	5	108992	348714
E2	5	119687	324307
E3	5	96431.5	313105
E4	5	105084	302208
E5	5	98853.3	301752
E6	5	110524	316107
E7	5	114583	313111
E8	5	101818	316266
E9	5	103944	331137
E10	5	91588.1	296792
E11	5	99566.3	309462
E12	5	81248.4	330668
F1	5	105255	347604
F2	5	101331	319405
F3	5	113273	317529
F4	5	92638.8	291685
F5	5	110229	309360
F6	5	108189	337168
F7	5	106550	329343
F8	5	111905	339886
F9	5	102021	342107
F10	5	93322.6	317916
F11	5	83088.3	273507
F12	5	85493.8	322163
G1	5	91654.1	325861
G2	5	129109	315704
G3	5	111672	301962
G4	5	113521	299577
G5	5	123157	304868
G6	5	124778	322890
G7	5	131430	334603
G8	5	138730	344047
G9	5	125041	308212
G10	5	125446	305057
G11	5	130844	339012
G12	5	111138	281869
H1	5	104789	283322
H2	5	110782	313485
H3	5	106209	313995
H4	5	117656	323574
H5	5	122660	291944
H6	5	134137	345804
H7	5	126193	298712
H8	5	129262	332803
H9	5	123424	331567
H10	5	127989	328055
H11	5	139949	376476
H12	5	168644	338425
A1	6	113731	315432
A2	6	98459.9	300362
A3	6	100975	286925
A4	6	100160	292542
A5	6	93008.5	268665
A6	6	73347	275718
A7	6	91778.5	287881
A8	6	100910	296809
A9	6	116270	311831
A10	6	96606	286362
A11	6	100741	328700
A12	6	101604	328982
B1	6	96462.9	258597
B2	6	108652	314363
B3	6	128601	304475
B4	6	104333	323106
B5	6	104636	320855
B6	6	83751.5	279439
B7	6	88488.9	280149
B8	6	92760.5	289247
B9	6	87535.6	285041
B10	6	77932.8	270929
B11	6	99034.1	324223
B12	6	82742.3	310286
C1	6	48258.6	278091
C2	6	105663	306185
C3	6	95057.7	328261
C4	6	107342	293086
C5	6	94739.3	283039
C6	6	90761.5	257169
C7	6	88353.5	244937
C8	6	97914.9	286029
C9	6	92779.3	273923
C10	6	98913.7	299396
C11	6	101802	328365
C12	6	115139	357843
D1	6	89262.7	243280
D2	6	86825.9	276707
D3	6	106332	288582
D4	6	98168.4	289481
D5	6	85138	253564
D6	6	87914.6	258964
D7	6	74792.5	236716
D8	6	93792.3	289425
D9	6	89758.1	282438
D10	6	86904.2	300058
D11	6	85279.7	305717
D12	6	118767	333701
E1	6	108870	343152
E2	6	118539	313854
E3	6	94462.5	303271
E4	6	102910	292603
E5	6	98466.9	293224
E6	6	110545	309885
E7	6	113170	305092
E8	6	101454	309698
E9	6	105103	325438
E10	6	91886.7	289630
E11	6	99516.7	300244
E12	6	82836.2	331377
F1	6	103788	334053
F2	6	102667	319476
F3	6	112286	305956
F4	6	94120.9	292829
F5	6	108980	298218
F6	6	107555	328183
F7	6	106438	325298
F8	6	110898	337698
F9	6	98875.7	334131
F10	6	93077.9	311667
F11	6	82202.2	263597
F12	6	84688.3	317934
G1	6	92877.8	322613
G2	6	128286	313126
G3	6	110861	297464
G4	6	113456	298038
G5	6	122062	302910
G6	6	123564	317998
G7	6	130818	333314
G8	6	137545	345056
G9	6	124664	308194
G10	6	126238	304753
G11	6	131279	338647
G12	6	112380	281548
H1	6	107475	283914
H2	6	111418	311546
H3	6	106169	313284
H4	6	117430	324193
H5	6	123341	290721
H6	6	134928	345938
H7	6	126268	297413
H8	6	129783	332156
H9	6	122712	331025
H10	6	128269	328271
H11	6	139728	375443
H12	6	172063	338560
A1	7	115219	307544
A2	7	100362	289452
A3	7	99975.5	277719
A4	7	98580.9	287477
A5	7	91258.5	267364
A6	7	72418.9	267671
A7	7	90605.8	279902
A8	7	99716.2	289496
A9	7	120091	303051
A10	7	96194.5	276338
A11	7	100519	320782
A12	7	101540	320567
B1	7	99145	253901
B2	7	109216	310399
B3	7	128189	296428
B4	7	105442	314759
B5	7	102663	312563
B6	7	83994.7	270690
B7	7	88561.4	270426
B8	7	91465.4	287757
B9	7	85706.8	276335
B10	7	78834.8	270187
B11	7	102141	317099
B12	7	84327.8	305904
C1	7	49210.8	269914
C2	7	106473	300315
C3	7	94865.7	316976
C4	7	105214	286031
C5	7	92828.8	274114
C6	7	90708.7	254558
C7	7	89686.6	243508
C8	7	99588.7	284725
C9	7	92095.5	269816
C10	7	100526	298512
C11	7	101747	314868
C12	7	116340	346384
D1	7	89175.2	235863
D2	7	87310.2	270278
D3	7	106708	285943
D4	7	98541	286467
D5	7	85997.3	252368
D6	7	88932.7	252182
D7	7	73716.8	231328
D8	7	92680.2	286738
D9	7	89614.3	280089
D10	7	87292.7	292782
D11	7	83949.2	296132
D12	7	119654	334852
E1	7	107442	332706
E2	7	119055	311500
E3	7	94182.2	298939
E4	7	102258	290021
E5	7	96710	288776
E6	7	109471	305129
E7	7	112497	303020
E8	7	100992	303855
E9	7	104718	316435
E10	7	92982.2	287657
E11	7	99044.2	300119
E12	7	84338	331401
F1	7	102889	330580
F2	7	104351	320189
F3	7	111385	303216
F4	7	96208	293951
F5	7	109368	296185
F6	7	106451	326336
F7	7	105908	323447
F8	7	111855	337122
F9	7	100290	331960
F10	7	92634.2	310673
F11	7	81603.2	261039
F12	7	82736.2	316505
G1	7	94174.6	323634
G2	7	128047	311963
G3	7	111025	296831
G4	7	114189	298268
G5	7	120843	300423
G6	7	123649	318006
G7	7	130315	332934
G8	7	137774	344897
G9	7	125074	307535
G10	7	127372	305632
G11	7	130002	337091
G12	7	112688	281623
H1	7	107142	284802
H2	7	111132	313118
H3	7	106961	313550
H4	7	117712	322517
H5	7	122390	290399
H6	7	135905	346310
H7	7	127027	297629
H8	7	131212	332179
H9	7	122207	330835
H10	7	127586	328508
H11	7	139953	376738
H12	7	173279	339112
A1	8	117420	306857
A2	8	100720	288347
A3	8	99211.3	275022
A4	8	98478.9	286062
A5	8	91328.3	266890
A6	8	72124.5	267363
A7	8	89829.6	275564
A8	8	97618.8	284372
A9	8	119461	301062
A10	8	96948.9	273852
A11	8	102706	319968
A12	8	101572	318131
B1	8	102011	253458
B2	8	109896	310573
B3	8	128622	294519
B4	8	105671	309166
B5	8	100835	310947
B6	8	84275.3	269055
B7	8	89281.6	269157
B8	8	92083.2	286478
B9	8	86480.2	275166
B10	8	79770.3	270187
B11	8	101557	309609
B12	8	85783.2	296008
C1	8	49448	267738
C2	8	107902	298618
C3	8	94964.2	314840
C4	8	104325	283075
C5	8	91540.1	270877
C6	8	90679.7	254337
C7	8	90078.7	243676
C8	8	100357	284552
C9	8	93487.1	269314
C10	8	101948	298453
C11	8	102430	314191
C12	8	117369	346488
D1	8	88714.8	226869
D2	8	88409.1	270681
D3	8	107843	285114
D4	8	98214.9	285914
D5	8	87309.9	251704
D6	8	89507.7	249381
D7	8	73237.1	229437
D8	8	93569.5	286197
D9	8	90751.1	279224
D10	8	87709.1	286863
D11	8	82972.7	291398
D12	8	120755	334916
E1	8	105789	329789
E2	8	119517	311136
E3	8	94983.7	297960
E4	8	101967	288598
E5	8	96361.1	286419
E6	8	107514	303493
E7	8	113522	301465
E8	8	100152	301764
E9	8	105134	315060
E10	8	93455.5	287470
E11	8	99032.8	299191
E12	8	85481.2	331623
F1	8	104194	330033
F2	8	105001	320338
F3	8	111865	302555
F4	8	97663.8	293680
F5	8	108787	294193
F6	8	108218	325477
F7	8	105316	322468
F8	8	112664	337017
F9	8	99758.2	330793
F10	8	94123.5	310743
F11	8	82207.6	259778
F12	8	81712.6	316026
G1	8	95408.6	324251
G2	8	128551	312231
G3	8	110783	295795
G4	8	114662	298627
G5	8	121295	298749
G6	8	125418	317772
G7	8	131815	332802
G8	8	137573	344022
G9	8	126604	307280
G10	8	127305	305699
G11	8	130876	336448
G12	8	113221	281872
H1	8	109474	285078
H2	8	112621	312348
H3	8	107741	313254
H4	8	118264	323781
H5	8	123442	290547
H6	8	137422	347628
H7	8	126859	298176
H8	8	131489	332439
H9	8	122622	331086
H10	8	128908	328061
H11	8	141730	376307
H12	8	175894	338622
A1	9	118846	305981
A2	9	103180	287427
A3	9	97935.3	273338
A4	9	97333.6	285152
A5	9	91451.9	266740
A6	9	72651.6	266933
A7	9	88974.5	274591
A8	9	99077	283474
A9	9	118274	300166
A10	9	98971.9	273463
A11	9	103745	319422
A12	9	101375	318009
B1	9	103289	253545
B2	9	112329	310863
B3	9	130992	294642
B4	9	107107	308590
B5	9	101948	310509
B6	9	84617	268851
B7	9	89479.8	269422
B8	9	90769.2	285943
B9	9	88109.8	275733
B10	9	82204.4	270501
B11	9	102029	307500
B12	9	85015	289720
C1	9	51134.4	267298
C2	9	109030	298573
C3	9	95563.4	314860
C4	9	104643	282617
C5	9	91650.8	270397
C6	9	90978	254397
C7	9	91200.4	244092
C8	9	101333	284386
C9	9	94344.3	269930
C10	9	103733	299245
C11	9	103252	314773
C12	9	118563	346335
D1	9	88497.2	214832
D2	9	89870.7	270996
D3	9	110120	285923
D4	9	100103	285483
D5	9	88298.4	251851
D6	9	90192.3	249208
D7	9	72293.8	227612
D8	9	94075.8	285258
D9	9	90958.4	280458
D10	9	86732.1	277632
D11	9	83526.5	290626
D12	9	122487	334619
E1	9	107250	329313
E2	9	122095	311024
E3	9	96229.1	298293
E4	9	102035	289025
E5	9	96874.7	285972
E6	9	107178	302031
E7	9	114347	301721
E8	9	99441.3	300312
E9	9	107029	314745
E10	9	94423.6	287445
E11	9	100119	298154
E12	9	86256.5	331387
F1	9	104663	329810
F2	9	105345	321031
F3	9	113988	303097
F4	9	99469.5	294341
F5	9	109376	294149
F6	9	108542	325481
F7	9	104484	322356
F8	9	113772	337317
F9	9	101222	330942
F10	9	93883	310601
F11	9	83118.9	259765
F12	9	84284.5	315709
G1	9	95957.2	324351
G2	9	130603	311671
G3	9	110976	295557
G4	9	115283	299149
G5	9	120607	298710
G6	9	126329	318277
G7	9	132823	332828
G8	9	138473	344241
G9	9	127568	307449
G10	9	127916	305452
G11	9	130722	336023
G12	9	115117	282042
H1	9	111164	285060
H2	9	114048	312449
H3	9	108838	313920
H4	9	118866	323914
H5	9	122743	290145
H6	9	137568	346868
H7	9	127666	297573
H8	9	132471	332523
H9	9	122399	330180
H10	9	131308	328475
H11	9	142389	377130
H12	9	177045	339262
A1	10	119212	306683
A2	10	102483	287527
A3	10	98594.3	272745
A4	10	96698	284300
A5	10	90384	266426
A6	10	72419	266286
A7	10	89844.8	274595
A8	10	101238	283015
A9	10	120662	299900
A10	10	99865	273788
A11	10	106547	319937
A12	10	104324	318330
B1	10	104270	252725
B2	10	113093	310264
B3	10	133352	294527
B4	10	107847	308607
B5	10	102754	309571
B6	10	85971	268814
B7	10	90092.8	269202
B8	10	91222.8	284726
B9	10	88251	275498
B10	10	82421.7	270556
B11	10	103339	308304
B12	10	86185.8	289371
C1	10	52145.8	267309
C2	10	108396	298945
C3	10	97484.3	314521
C4	10	105084	282050
C5	10	93158.3	270944
C6	10	91431.6	254778
C7	10	91798.7	243990
C8	10	102827	285166
C9	10	95105.9	270300
C10	10	105145	299378
C11	10	104223	314524
C12	10	119807	346405
D1	10	89183.8	214743
D2	10	89815.3	270885
D3	10	112499	286778
D4	10	101390	285613
D5	10	89133.1	251632
D6	10	90694	248798
D7	10	71652.5	227515
D8	10	94128.4	286166
D9	10	90904.9	280634
D10	10	87300.3	276311
D11	10	84113.9	290579
D12	10	122756	335120
E1	10	107612	329042
E2	10	123052	311294
E3	10	97891.1	297432
E4	10	103557	289164
E5	10	98363.1	286041
E6	10	107954	302218
E7	10	115088	301633
E8	10	100102	299770
E9	10	107135	314215
E10	10	94715.2	288227
E11	10	101616	298943
E12	10	87266	332237
F1	10	105678	329816
F2	10	106671	320870
F3	10	115021	302699
F4	10	99304.4	294184
F5	10	110540	293906
F6	10	109997	325584
F7	10	105126	320989
F8	10	113643	336511
F9	10	101200	330733
F10	10	94928.9	311025
F11	10	83031.6	260140
F12	10	85466.9	316762
G1	10	96644.9	323626
G2	10	130911	312325
G3	10	112130	295958
G4	10	116343	299447
G5	10	121802	298400
G6	10	127163	318859
G7	10	134365	333181
G8	10	138506	343983
G9	10	128483	307605
G10	10	128923	306165
G11	10	132244	335848
G12	10	115696	282737
H1	10	112444	285875
H2	10	115433	312813
H3	10	108669	314003
H4	10	118768	324124
H5	10	122279	290126
H6	10	138854	347729
H7	10	128982	298503
H8	10	132646	333167
H9	10	123993	330873
H10	10	131560	329589
H11	10	142864	377274
H12	10	176642	339709
A1	11	121328	306800
A2	11	103642	288857
A3	11	101125	273006
A4	11	96788.7	284048
A5	11	89853.8	266698
A6	11	71691.2	265965
A7	11	90931.1	274743
A8	11	101785	283255
A9	11	122577	299468
A10	11	101451	273632
A11	11	107411	320023
A12	11	104830	319528
B1	11	105834	253234
B2	11	113006	310669
B3	11	136140	294848
B4	11	109044	308141
B5	11	103647	310513
B6	11	85767.1	268982
B7	11	90407.8	268713
B8	11	93033.4	284401
B9	11	89945.3	275824
B10	11	82721.1	271191
B11	11	102274	307795
B12	11	86283.2	289317
C1	11	52946.2	266960
C2	11	110346	299218
C3	11	98395.6	314311
C4	11	106711	281096
C5	11	93971.8	269803
C6	11	92536	254748
C7	11	91873	243707
C8	11	102660	285068
C9	11	96108.8	269659
C10	11	105248	298915
C11	11	105134	314740
C12	11	120794	346055
D1	11	90379.4	215056
D2	11	90766.4	271854
D3	11	113774	286750
D4	11	101668	285170
D5	11	89602.4	252038
D6	11	91234.9	249628
D7	11	72854.1	227003
D8	11	95504.3	285375
D9	11	92016.3	280736
D10	11	86942.3	275553
D11	11	85002.3	290189
D12	11	123228	334618
E1	11	109201	329460
E2	11	123293	310865
E3	11	98468.8	297851
E4	11	104074	289120
E5	11	98755.4	286139
E6	11	107766	302223
E7	11	116155	301281
E8	11	100607	300097
E9	11	107650	313747
E10	11	95265.8	288229
E11	11	101719	298650
E12	11	88266.5	332480
F1	11	108634	330584
F2	11	106590	320707
F3	11	116966	302784
F4	11	100733	295153
F5	11	111995	293901
F6	11	110643	325087
F7	11	105791	321135
F8	11	115047	337239
F9	11	102793	330649
F10	11	95042.9	310298
F11	11	83142.2	259877
F12	11	85813.1	316920
G1	11	97123	325353
G2	11	132213	312758
G3	11	113238	295843
G4	11	117580	299573
G5	11	122619	298750
G6	11	127962	318966
G7	11	135947	333525
G8	11	140243	344327
G9	11	129487	307928
G10	11	130227	305490
G11	11	133472	335932
G12	11	115997	282039
H1	11	113399	286610
H2	11	116353	313014
H3	11	110753	314037
H4	11	119939	323902
H5	11	121637	290056
H6	11	140393	348909
H7	11	129642	298877
H8	11	133287	333842
H9	11	124339	331210
H10	11	132288	329821
H11	11	143819	377045
H12	11	179484	339935
A1	12	121580	306531
A2	12	105632	288032
A3	12	101083	273481
A4	12	98651.2	284260
A5	12	91451.2	265968
A6	12	71981.2	265906
A7	12	92279	274581
A8	12	102972	283619
A9	12	122743	300143
A10	12	103637	273873
A11	12	108950	320176
A12	12	105329	319188
B1	12	105453	252750
B2	12	115272	311672
B3	12	136351	295222
B4	12	110020	308261
B5	12	104923	310537
B6	12	86791.6	268629
B7	12	90071.2	269142
B8	12	93992.5	285002
B9	12	90533.3	276515
B10	12	82544.8	271436
B11	12	103951	307937
B12	12	86986.8	288982
C1	12	54091.7	266956
C2	12	110770	298738
C3	12	99695.1	314993
C4	12	107365	281980
C5	12	95437.9	270955
C6	12	93094.6	254765
C7	12	92096.4	244323
C8	12	103900	285866
C9	12	96514.4	271025
C10	12	106312	300042
C11	12	104760	314238
C12	12	121199	347088
D1	12	90616.5	214836
D2	12	91315	271464
D3	12	115147	286875
D4	12	101938	286070
D5	12	90404.6	251849
D6	12	92392.9	249576
D7	12	73560.9	227196
D8	12	95956.3	285854
D9	12	92674.3	280512
D10	12	87865.2	276206
D11	12	84222.6	290892
D12	12	123255	333848
E1	12	111181	329937
E2	12	124423	310938
E3	12	99442.7	297951
E4	12	105420	289278
E5	12	99000.8	285988
E6	12	108088	302664
E7	12	116726	301901
E8	12	101654	300620
E9	12	108911	314818
E10	12	94968	287984
E11	12	102458	298436
E12	12	87995.4	332334
F1	12	107677	330188
F2	12	107631	321451
F3	12	117535	303412
F4	12	100921	295334
F5	12	112177	294760
F6	12	111424	325252
F7	12	106599	320666
F8	12	115476	336760
F9	12	103120	330656
F10	12	95542.6	310720
F11	12	83405.2	259335
F12	12	86340.6	317098
G1	12	99372.1	325347
G2	12	132224	313028
G3	12	114648	296613
G4	12	118127	299874
G5	12	123664	299020
G6	12	128545	318951
G7	12	136617	333714
G8	12	140584	344552
G9	12	130061	307913
G10	12	132045	305809
G11	12	135470	336434
G12	12	117644	283025
H1	12	113927	286191
H2	12	117787	312576
H3	12	111788	313833
H4	12	121417	324740
H5	12	121903	289689
H6	12	141369	349189
H7	12	130477	299222
H8	12	133655	333471
H9	12	125597	330702
H10	12	132973	329228
H11	12	144445	377917
H12	12	178764	340268
A1	13	123704	306800
A2	13	105504	287864
A3	13	102629	273966
A4	13	100067	284141
A5	13	93459.1	266210
A6	13	71863.5	265585
A7	13	93780.5	274882
A8	13	103795	283808
A9	13	122355	301661
A10	13	103414	273244
A11	13	109657	320132
A12	13	106642	319264
B1	13	106205	253799
B2	13	115634	311286
B3	13	138143	295053
B4	13	111134	309379
B5	13	105205	310942
B6	13	87734.7	268269
B7	13	90909.7	269488
B8	13	94904.9	285792
B9	13	91137.1	276396
B10	13	83189.3	271218
B11	13	103106	308356
B12	13	86483.2	288759
C1	13	54841.2	266906
C2	13	112413	299619
C3	13	100716	315316
C4	13	108694	282173
C5	13	96138.3	270899
C6	13	92769.7	255042
C7	13	92919.2	243968
C8	13	103977	286505
C9	13	98437.6	270753
C10	13	107067	299904
C11	13	105376	315167
C12	13	123030	347202
D1	13	91099.4	214874
D2	13	91509.8	271082
D3	13	116167	287723
D4	13	102801	286537
D5	13	90528.9	252441
D6	13	93026.4	249428
D7	13	74010.6	226738
D8	13	96745.6	285896
D9	13	93216.2	280397
D10	13	88262.2	276460
D11	13	86032.9	291097
D12	13	124304	334130
E1	13	112401	329815
E2	13	126346	311045
E3	13	99780.5	298060
E4	13	106175	289099
E5	13	100346	285531
E6	13	109278	302681
E7	13	117394	301083
E8	13	102059	300028
E9	13	110065	314823
E10	13	95369.6	288193
E11	13	102570	299178
E12	13	89583.3	332162
F1	13	109931	329970
F2	13	108421	321378
F3	13	118650	303657
F4	13	102279	295143
F5	13	113008	294791
F6	13	112464	325852
F7	13	107080	320964
F8	13	116807	337303
F9	13	103026	330627
F10	13	95496.8	311262
F11	13	84340.2	259917
F12	13	86760.9	317391
G1	13	99119.3	325052
G2	13	133769	313074
G3	13	114850	297226
G4	13	119602	299888
G5	13	124978	299329
G6	13	128977	319714
G7	13	137244	333133
G8	13	142870	344595
G9	13	130793	307940
G10	13	132612	306012
G11	13	136620	336499
G12	13	117010	283088
H1	13	116090	286543
H2	13	119885	313508
H3	13	114435	314778
H4	13	121760	324050
H5	13	124424	289107
H6	13	143047	348942
H7	13	130639	298970
H8	13	135325	334333
H9	13	126594	330752
H10	13	133102	329172
H11	13	144870	377505
H12	13	180030	339597
A1	14	125116	307547
A2	14	106894	288479
A3	14	103969	273705
A4	14	100688	284756
A5	14	94821.2	266486
A6	14	73008.6	265553
A7	14	95368.8	275375
A8	14	104530	284374
A9	14	121699	301808
A10	14	104020	273615
A11	14	110605	320650
A12	14	107977	319950
B1	14	106990	253246
B2	14	116006	311583
B3	14	138517	295100
B4	14	110554	308926
B5	14	106459	310336
B6	14	87861.3	269199
B7	14	91223.9	269090
B8	14	94723.3	285658
B9	14	91587.3	276350
B10	14	83609.4	271229
B11	14	103598	308174
B12	14	86158.8	289578
C1	14	54881.8	267195
C2	14	113164	300009
C3	14	101109	314763
C4	14	108766	282192
C5	14	96422.8	271081
C6	14	93516.7	255171
C7	14	93624	244387
C8	14	105321	285687
C9	14	97662.9	271030
C10	14	107396	299398
C11	14	107081	314600
C12	14	123699	347707
D1	14	91716.7	214719
D2	14	92669.3	271254
D3	14	118104	287738
D4	14	103695	286532
D5	14	90495.7	252768
D6	14	92988.3	249400
D7	14	74228.4	227376
D8	14	97132.3	286453
D9	14	93041.7	280801
D10	14	88349.8	276345
D11	14	86570.6	290941
D12	14	124171	334036
E1	14	112503	330293
E2	14	126548	311621
E3	14	100536	298699
E4	14	106648	289361
E5	14	100868	286216
E6	14	109978	302873
E7	14	118169	302170
E8	14	103094	299793
E9	14	111127	314546
E10	14	96500.2	288071
E11	14	103705	298859
E12	14	89031.4	333026
F1	14	109751	330292
F2	14	108514	321714
F3	14	119369	303834
F4	14	102553	295315
F5	14	113479	294901
F6	14	111897	326235
F7	14	107513	321312
F8	14	117397	337583
F9	14	103520	331242
F10	14	95596	310445
F11	14	83791.6	259878
F12	14	87802	317360
G1	14	100428	324945
G2	14	134861	313308
G3	14	116653	296927
G4	14	119512	300234
G5	14	125315	299507
G6	14	130344	318968
G7	14	138051	334274
G8	14	142485	344667
G9	14	130984	308683
G10	14	134827	305771
G11	14	137709	336514
G12	14	119244	282896
H1	14	117733	285466
H2	14	122008	313578
H3	14	117616	314530
H4	14	122898	324565
H5	14	125863	289909
H6	14	144406	349282
H7	14	131630	299491
H8	14	136037	334352
H9	14	126584	331244
H10	14	133383	330381
H11	14	145411	378031
H12	14	180526	340672
A1	15	125452	307147
A2	15	107251	288183
A3	15	105046	273910
A4	15	100930	285189
A5	15	94744.8	266803
A6	15	73402.1	265482
A7	15	95336.7	275316
A8	15	105400	284107
A9	15	125764	298851
A10	15	105528	273727
A11	15	110871	320771
A12	15	108562	319351
B1	15	108340	253217
B2	15	116360	311395
B3	15	140777	295141
B4	15	111975	309041
B5	15	106842	310663
B6	15	88334.8	269122
B7	15	91685.6	268901
B8	15	95784.2	285956
B9	15	92121.5	276393
B10	15	83586.4	271434
B11	15	103897	308478
B12	15	86600.7	288614
C1	15	55707.2	267066
C2	15	114822	300010
C3	15	102370	315187
C4	15	109744	282376
C5	15	96857.8	270725
C6	15	93924.8	254944
C7	15	93776.9	244826
C8	15	106111	286070
C9	15	98933.2	270923
C10	15	108093	299480
C11	15	107272	315418
C12	15	124192	346911
D1	15	92241.7	214899
D2	15	92813	271612
D3	15	119065	287949
D4	15	103149	286423
D5	15	91561.3	253010
D6	15	93487.1	249490
D7	15	74818.3	227191
D8	15	98311.9	286150
D9	15	92420.4	280828
D10	15	88584.4	275748
D11	15	86301.8	291161
D12	15	123864	333824
E1	15	114115	329998
E2	15	127644	311501
E3	15	101030	298326
E4	15	106067	289673
E5	15	101270	285911
E6	15	111217	302378
E7	15	118494	301987
E8	15	103287	300075
E9	15	113665	314626
E10	15	96662.9	288632
E11	15	105413	299196
E12	15	89963.3	333246
F1	15	110075	330814
F2	15	109168	321090
F3	15	119891	303263
F4	15	103081	296185
F5	15	113873	294789
F6	15	112789	325484
F7	15	108231	321309
F8	15	117360	337244
F9	15	105032	330994
F10	15	95353.8	310677
F11	15	84237.6	259255
F12	15	88505.1	318040
G1	15	101861	325062
G2	15	135988	313094
G3	15	117962	296665
G4	15	119344	300393
G5	15	125356	299310
G6	15	130749	319066
G7	15	139424	333867
G8	15	143965	345138
G9	15	131723	307827
G10	15	137602	305965
G11	15	142055	337293
G12	15	123117	282993
H1	15	122625	286278
H2	15	128535	313084
H3	15	122964	314853
H4	15	125745	324531
H5	15	130240	289920
H6	15	148521	349091
H7	15	133745	298582
H8	15	137011	334358
H9	15	128302	331111
H10	15	133001	329200
H11	15	146366	378262
H12	15	182748	340689
A1	16	124315	307705
A2	16	107975	287940
A3	16	105323	273876
A4	16	102433	285283
A5	16	96163.1	267278
A6	16	75825.5	265805
A7	16	95171.1	275512
A8	16	105704	284320
A9	16	121312	301459
A10	16	105918	273935
A11	16	111309	320901
A12	16	108267	319848
B1	16	108327	252747
B2	16	118207	311562
B3	16	142208	295465
B4	16	112148	308769
B5	16	107363	310866
B6	16	88247.1	269139
B7	16	92494.4	269582
B8	16	96469.8	285465
B9	16	91635.7	276469
B10	16	84068.8	271371
B11	16	104392	308026
B12	16	87696.1	289587
C1	16	56103.7	267070
C2	16	114543	300399
C3	16	103416	315390
C4	16	110133	282993
C5	16	97539.7	271075
C6	16	94242.9	254809
C7	16	93754.1	244555
C8	16	105799	286588
C9	16	99070.8	271257
C10	16	108096	299853
C11	16	107538	315236
C12	16	124812	347109
D1	16	92644.6	214881
D2	16	93278.7	271484
D3	16	118888	288015
D4	16	103931	286629
D5	16	92037.1	253061
D6	16	94552.5	249681
D7	16	75981.1	227093
D8	16	98090.7	286261
D9	16	93018.9	281490
D10	16	88685.1	276778
D11	16	85260.6	291542
D12	16	125089	333959
E1	16	113529	330154
E2	16	127941	311630
E3	16	102431	298645
E4	16	107092	289682
E5	16	101650	285858
E6	16	110808	302830
E7	16	118942	301946
E8	16	103629	300457
E9	16	117533	315035
E10	16	96772	288715
E11	16	105521	299434
E12	16	90899.2	333538
F1	16	111685	330618
F2	16	109258	321760
F3	16	121113	303822
F4	16	103141	295568
F5	16	114366	295241
F6	16	113527	326041
F7	16	108029	320654
F8	16	117766	337278
F9	16	104867	331017
F10	16	96010.8	311382
F11	16	84688.8	260312
F12	16	88152.6	317955
G1	16	103987	324712
G2	16	138558	313218
G3	16	121098	296981
G4	16	120576	300558
G5	16	126263	300230
G6	16	130898	318410
G7	16	141803	334002
G8	16	146705	345222
G9	16	132711	308481
G10	16	145082	306000
G11	16	149504	337348
G12	16	126974	282975
H1	16	131102	286107
H2	16	138752	313669
H3	16	134031	314464
H4	16	130137	324400
H5	16	137510	289845
H6	16	154664	349688
H7	16	135249	298864
H8	16	139059	334243
H9	16	130226	330632
H10	16	134331	330014
H11	16	146344	378308
H12	16	181653	340698
A1	17	127433	307690
A2	17	107829	288807
A3	17	106920	274637
A4	17	102126	284931
A5	17	96253.8	267565
A6	17	76109	265902
A7	17	96435.7	276117
A8	17	106441	284290
A9	17	127818	299561
A10	17	105685	274359
A11	17	111724	319603
A12	17	110037	320182
B1	17	108227	252892
B2	17	118490	311801
B3	17	142807	295035
B4	17	112471	308834
B5	17	108134	311183
B6	17	88704.6	269203
B7	17	91947.9	269895
B8	17	96582.9	285490
B9	17	92021.4	276474
B10	17	84010	271505
B11	17	104220	308500
B12	17	86045.1	289337
C1	17	57429.3	267453
C2	17	117024	299855
C3	17	104638	314701
C4	17	111092	283086
C5	17	98238.5	271067
C6	17	94118.9	255121
C7	17	93882.4	244366
C8	17	106371	286133
C9	17	99822.2	270990
C10	17	108815	299878
C11	17	108397	314956
C12	17	125653	348061
D1	17	93092.4	214747
D2	17	94488.4	272361
D3	17	120147	288401
D4	17	104809	286636
D5	17	92706.2	253011
D6	17	94943.1	249511
D7	17	75410.4	226908
D8	17	99009.5	286481
D9	17	93745.8	281286
D10	17	89137.1	276662
D11	17	87032.6	291274
D12	17	124459	334245
E1	17	114554	330434
E2	17	129277	311658
E3	17	101762	298547
E4	17	106942	289255
E5	17	102238	286621
E6	17	112183	302562
E7	17	119792	302494
E8	17	104676	299940
E9	17	126257	314767
E10	17	97868	288718
E11	17	104975	298724
E12	17	91558.9	334063
F1	17	111690	331374
F2	17	110483	322486
F3	17	120739	303976
F4	17	103243	295942
F5	17	116126	295539
F6	17	113122	326271
F7	17	109238	320328
F8	17	117561	337736
F9	17	106309	331658
F10	17	96882.6	311636
F11	17	84584.4	260199
F12	17	89035.3	318193
G1	17	108566	324897
G2	17	140826	313946
G3	17	125613	296953
G4	17	121866	300848
G5	17	127774	299968
G6	17	130637	319142
G7	17	143964	334123
G8	17	148456	344990
G9	17	135043	308581
G10	17	156623	307001
G11	17	161336	336906
G12	17	134559	282893
H1	17	146345	286715
H2	17	157296	313650
H3	17	153648	314809
H4	17	137057	323482
H5	17	150751	290549
H6	17	163454	349301
H7	17	138985	299351
H8	17	143841	334033
H9	17	133783	331870
H10	17	135132	330086
H11	17	147974	379256
H12	17	182869	341466
A1	18	125927	307908
A2	18	109423	287927
A3	18	108026	274580
A4	18	103673	285285
A5	18	96816.4	267162
A6	18	76986.2	266397
A7	18	96567.6	276033
A8	18	106535	284660
A9	18	123774	301230
A10	18	107350	274075
A11	18	112353	320250
A12	18	110277	319722
B1	18	110235	253205
B2	18	118283	311969
B3	18	144180	295569
B4	18	112338	308754
B5	18	108507	310714
B6	18	89580.1	269438
B7	18	92485.7	269317
B8	18	96586.3	285950
B9	18	92664.6	276765
B10	18	84008.4	271957
B11	18	103898	308652
B12	18	88421.3	289916
C1	18	60352.1	267516
C2	18	119417	300132
C3	18	107367	315147
C4	18	111172	283330
C5	18	98403	271290
C6	18	94238.7	254947
C7	18	95069.5	244739
C8	18	108029	286288
C9	18	100276	270545
C10	18	109300	300032
C11	18	109696	314645
C12	18	125699	346957
D1	18	93765.4	214922
D2	18	94549.3	271915
D3	18	121521	288200
D4	18	106367	286794
D5	18	93855.9	253462
D6	18	96116.7	249880
D7	18	76549.3	227377
D8	18	99768.8	286987
D9	18	94302	281208
D10	18	89298	276305
D11	18	86580.5	291176
D12	18	124567	334834
E1	18	114559	331112
E2	18	129298	311756
E3	18	103463	298630
E4	18	108306	289362
E5	18	103108	285892
E6	18	112230	302784
E7	18	119138	302550
E8	18	104598	300407
E9	18	138658	314459
E10	18	98100.4	288336
E11	18	105665	299432
E12	18	91997	333482
F1	18	111586	330525
F2	18	110026	321605
F3	18	120953	303843
F4	18	104197	296280
F5	18	115873	295515
F6	18	114964	326525
F7	18	109375	320781
F8	18	118058	336980
F9	18	105704	331554
F10	18	96202.6	310911
F11	18	85256.5	259987
F12	18	89442.3	318754
G1	18	115911	325478
G2	18	148159	313685
G3	18	131458	296532
G4	18	123204	300951
G5	18	128853	299827
G6	18	133317	318946
G7	18	148094	334027
G8	18	154345	345152
G9	18	139114	308572
G10	18	181132	306242
G11	18	184961	337124
G12	18	151411	283919
H1	18	174462	286827
H2	18	193525	314249
H3	18	187659	314917
H4	18	149843	324284
H5	18	175161	290210
H6	18	183642	349747
H7	18	145642	298920
H8	18	151327	334529
H9	18	141583	330659
H10	18	135019	330227
H11	18	147423	379386
H12	18	182291	342058
A1	19	129080	307499
A2	19	110356	287667
A3	19	109279	274782
A4	19	103808	285450
A5	19	97828	267040
A6	19	76893.1	266185
A7	19	97114.5	276002
A8	19	106478	284510
A9	19	128216	299488
A10	19	108644	274245
A11	19	113720	320692
A12	19	110643	319692
B1	19	110431	252884
B2	19	119016	311101
B3	19	144706	295795
B4	19	112770	309453
B5	19	108878	310956
B6	19	89260.9	269798
B7	19	91951.8	269774
B8	19	97131	286617
B9	19	92240.7	276630
B10	19	84040.9	271869
B11	19	104906	308915
B12	19	87390.4	289444
C1	19	64142	268262
C2	19	123807	300128
C3	19	112544	315715
C4	19	112494	283290
C5	19	99565.6	271257
C6	19	95298.5	254908
C7	19	95675.5	244451
C8	19	108131	286781
C9	19	100865	271663
C10	19	110736	300052
C11	19	110018	314602
C12	19	128431	347367
D1	19	94517.5	214730
D2	19	96257.5	272616
D3	19	122938	288320
D4	19	107613	286771
D5	19	95292.2	252874
D6	19	97790.5	249387
D7	19	76708.2	227292
D8	19	99978.7	286258
D9	19	94636.1	281180
D10	19	88462.6	277064
D11	19	86383.6	291718
D12	19	124996	334584
E1	19	115487	330986
E2	19	129642	311944
E3	19	103005	298589
E4	19	108383	289516
E5	19	102795	286181
E6	19	111945	302533
E7	19	120375	302196
E8	19	104760	300201
E9	19	166157	314871
E10	19	97786.5	288696
E11	19	105897	299683
E12	19	92731.9	333617
F1	19	112688	330641
F2	19	111351	322361
F3	19	121143	303852
F4	19	105272	295659
F5	19	117817	295913
F6	19	115121	326572
F7	19	110569	320946
F8	19	118383	337169
F9	19	105657	332061
F10	19	96256.2	311269
F11	19	85306.6	260309
F12	19	89386.6	318250
G1	19	127340	325233
G2	19	160774	313180
G3	19	145721	296230
G4	19	126196	301277
G5	19	131722	300004
G6	19	134526	319039
G7	19	156359	333915
G8	19	163646	345285
G9	19	147862	308178
G10	19	221095	306659
G11	19	227872	336864
G12	19	178397	283325
H1	19	223095	287072
H2	19	253128	314248
H3	19	249305	314761
H4	19	174055	323804
H5	19	218324	289905
H6	19	219426	349486
H7	19	158594	296427
H8	19	166314	334465
H9	19	154248	330631
H10	19	135663	330584
H11	19	148617	379384
H12	19	183721	340887
A1	20	130484	308345
A2	20	112226	287895
A3	20	112178	274477
A4	20	103237	285477
A5	20	97423	267077
A6	20	78151.3	266869
A7	20	97731.9	276053
A8	20	107262	284937
A9	20	124273	301871
A10	20	109726	274067
A11	20	113806	319803
A12	20	112585	319748
B1	20	110181	253038
B2	20	120602	311382
B3	20	145960	295243
B4	20	113447	309010
B5	20	109687	310945
B6	20	90057	269784
B7	20	91919.6	269799
B8	20	97484.3	285929
B9	20	92804.5	276700
B10	20	84464.8	271925
B11	20	104981	309421
B12	20	87469.3	289592
C1	20	72848.5	267386
C2	20	133803	300448
C3	20	123087	315850
C4	20	114270	283891
C5	20	99919.1	271452
C6	20	96539.7	255167
C7	20	97563.7	245005
C8	20	110554	286453
C9	20	102096	271629
C10	20	114601	299977
C11	20	113728	314190
C12	20	131773	347169
D1	20	95324.4	214867
D2	20	99325.4	272321
D3	20	125561	288819
D4	20	111438	287211
D5	20	97392.6	253118
D6	20	101025	249506
D7	20	77989.5	226919
D8	20	101978	286731
D9	20	96674.9	281115
D10	20	89329	276771
D11	20	87504.1	291241
D12	20	125189	334957
E1	20	116671	330267
E2	20	130267	311770
E3	20	104016	298425
E4	20	107883	289972
E5	20	102778	286846
E6	20	112065	302584
E7	20	120740	303003
E8	20	105606	300556
E9	20	214821	315348
E10	20	98764.7	288429
E11	20	106744	299625
E12	20	94458.2	333859
F1	20	113334	331291
F2	20	110680	322528
F3	20	122296	303378
F4	20	107691	295932
F5	20	119489	295789
F6	20	115972	327286
F7	20	110911	320758
F8	20	119439	337109
F9	20	107159	332730
F10	20	96715.8	311239
F11	20	85096.1	260362
F12	20	90758.8	318976
G1	20	152785	324854
G2	20	184776	313721
G3	20	171266	296879
G4	20	130949	300851
G5	20	137321	300547
G6	20	140285	319497
G7	20	172195	334421
G8	20	181361	345596
G9	20	162955	309117
G10	20	293561	306202
G11	20	300399	336533
G12	20	229866	283377
H1	20	297397	286878
H2	20	346644	314151
H3	20	341971	314894
H4	20	219113	324124
H5	20	289583	290020
H6	20	283490	349427
H7	20	181294	296242
H8	20	191819	334501
H9	20	181644	330959
H10	20	137184	330223
H11	20	150500	379390
H12	20	185534	341813
A1	21	135301	306997
A2	21	116548	288192
A3	21	116958	274217
A4	21	103936	285399
A5	21	98222.6	267556
A6	21	78850.8	265905
A7	21	97373.1	276173
A8	21	107122	284932
A9	21	124914	301133
A10	21	111240	274373
A11	21	117426	320350
A12	21	115459	319581
B1	21	111790	253205
B2	21	119874	310938
B3	21	149085	295192
B4	21	112727	308642
B5	21	110174	311257
B6	21	90124.1	269829
B7	21	92812.4	270020
B8	21	97632	286179
B9	21	92980	276596
B10	21	84094.7	272342
B11	21	105128	309218
B12	21	87563	289808
C1	21	88404.8	267263
C2	21	151582	300141
C3	21	143400	315590
C4	21	116200	283587
C5	21	101972	271138
C6	21	97220.9	254956
C7	21	100269	244792
C8	21	115076	286319
C9	21	106724	271559
C10	21	120782	299794
C11	21	118788	314068
C12	21	138282	347128
D1	21	97903.9	214881
D2	21	104104	272039
D3	21	131719	288567
D4	21	118167	286806
D5	21	104251	253333
D6	21	106878	249451
D7	21	80786.1	227315
D8	21	105718	287002
D9	21	100614	280597
D10	21	89361.7	276260
D11	21	87596.8	291329
D12	21	124954	334908
E1	21	116924	331134
E2	21	130184	312242
E3	21	104229	299143
E4	21	109246	289681
E5	21	103381	286533
E6	21	113315	302995
E7	21	120821	302693
E8	21	104873	300530
E9	21	295694	314793
E10	21	99836.8	288138
E11	21	107742	299422
E12	21	97765.7	333708
F1	21	112617	331521
F2	21	111911	322212
F3	21	122767	304211
F4	21	110488	296532
F5	21	121552	295732
F6	21	117028	326790
F7	21	111819	321772
F8	21	119811	337652
F9	21	109192	332619
F10	21	96607.2	311435
F11	21	84815.5	260497
F12	21	91603.4	318282
G1	21	195723	324736
[truncated: 10,775 more rows]

## Sheet: Amplification Data
Block Type	96fast
Chemistry	SYBR_GREEN
Experiment File Name	S:\LQW\ZHB\2014-3.eds
Experiment Run End Time	2012-05-24 01:54:34 AM CST
Instrument Type	sds7500fast
Passive Reference	ROX
Well	Cycle	Target Name	Rn	ΔRn
A1	1	1801	0.319264	-0.0209857
A1	2	1801	0.330046	-0.0149389
A1	3	1801	0.336039	-0.0136801
A1	4	1801	0.344235	-0.0102193
A1	5	1801	0.356443	-0.00274632
A1	6	1801	0.360558	-0.00336628
A1	7	1801	0.374641	0.00598211
A1	8	1801	0.382654	0.0092606
A1	9	1801	0.388409	0.0102798
A1	10	1801	0.388713	0.00584959
A1	11	1801	0.395463	0.0078647
A1	12	1801	0.396633	0.0042998
A1	13	1801	0.403207	0.00613848
A1	14	1801	0.406819	0.00501579
A1	15	1801	0.408443	0.0019049
A1	16	1801	0.404006	-0.00726668
A1	17	1801	0.414162	-0.00184594
A1	18	1801	0.408975	-0.0117681
A1	19	1801	0.419775	-0.00570303
A1	20	1801	0.423174	-0.00703818
A1	21	1801	0.440724	0.00577676
A1	22	1801	0.463786	0.0241036
A1	23	1801	0.50472	0.0603029
A1	24	1801	0.579915	0.130763
A1	25	1801	0.721118	0.267231
A1	26	1801	0.958787	0.500165
A1	27	1801	1.26748	0.804128
A1	28	1801	1.60083	1.13274
A1	29	1801	1.82246	1.34964
A1	30	1801	1.97544	1.49788
A1	31	1801	2.14925	1.66695
A1	32	1801	2.29332	1.80629
A1	33	1801	2.39254	1.90077
A1	34	1801	2.47965	1.98315
A1	35	1801	2.55254	2.05131
A1	36	1801	2.59853	2.09256
A1	37	1801	2.63906	2.12836
A1	38	1801	2.67588	2.16044
A1	39	1801	2.68992	2.16975
A1	40	1801	2.71665	2.19174
A2	1	1801	0.292861	-0.0224975
A2	2	1801	0.305501	-0.0139161
A2	3	1801	0.315263	-0.00821145
A2	4	1801	0.32034	-0.00719314
A2	5	1801	0.329342	-0.00224854
A2	6	1801	0.327804	-0.00784441
A2	7	1801	0.346732	0.00702564
A2	8	1801	0.3493	0.0055357
A2	9	1801	0.358979	0.0111563
A2	10	1801	0.35643	0.00454969
A2	11	1801	0.358799	0.00286068
A2	12	1801	0.366735	0.00673933
A2	13	1801	0.366506	0.00245245
A2	14	1801	0.370541	0.00242962
A2	15	1801	0.372162	-7.64663e-06
A2	16	1801	0.37499	-0.0012375
A2	17	1801	0.373361	-0.00692486
A2	18	1801	0.380039	-0.00430455
A2	19	1801	0.383624	-0.00477736
A2	20	1801	0.389816	-0.00264339
A2	21	1801	0.404411	0.00789337
A2	22	1801	0.426222	0.025647
A2	23	1801	0.475892	0.0712592
A2	24	1801	0.567433	0.158742
A2	25	1801	0.711789	0.29904
A2	26	1801	0.952808	0.536002
A2	27	1801	1.28508	0.86422
A2	28	1801	1.62182	1.1969
A2	29	1801	1.82942	1.40043
A2	30	1801	1.98545	1.55241
A2	31	1801	2.16111	1.72401
A2	32	1801	2.30321	1.86205
A2	33	1801	2.40222	1.95701
A2	34	1801	2.48307	2.0338
A2	35	1801	2.5421	2.08877
A2	36	1801	2.59336	2.13597
A2	37	1801	2.63377	2.17233
A2	38	1801	2.66606	2.20056
A2	39	1801	2.69226	2.2227
A2	40	1801	2.71153	2.23791
A3	1	1801	0.312334	-0.0172403
A3	2	1801	0.323316	-0.0100618
A3	3	1801	0.328181	-0.00899979
A3	4	1801	0.34058	-0.00040358
A3	5	1801	0.344732	-5.38474e-05
A3	6	1801	0.351922	0.00333316
A3	7	1801	0.359988	0.00759629
A3	8	1801	0.360739	0.00454439
A3	9	1801	0.358294	-0.00170361
A3	10	1801	0.361489	-0.00231109
A3	11	1801	0.370413	0.00281002
A3	12	1801	0.369618	-0.00178815
A3	13	1801	0.374604	-0.000604697
A3	14	1801	0.379859	0.000847602
A3	15	1801	0.383503	0.000689086
A3	16	1801	0.384566	-0.00205156
A3	17	1801	0.389315	-0.00110507
A3	18	1801	0.393424	-0.000799147
A3	19	1801	0.397694	-0.000332023
A3	20	1801	0.408697	0.00686888
A3	21	1801	0.426518	0.0208869
A3	22	1801	0.453859	0.0444249
A3	23	1801	0.507638	0.094401
A3	24	1801	0.603839	0.186799
A3	25	1801	0.777927	0.357085
A3	26	1801	1.04725	0.622605
A3	27	1801	1.41436	0.985914
A3	28	1801	1.76664	1.33439
A3	29	1801	1.98051	1.54445
A3	30	1801	2.15547	1.71561
A3	31	1801	2.32815	1.88449
A3	32	1801	2.49083	2.04337
A3	33	1801	2.60166	2.1504
A3	34	1801	2.68099	2.22592
A3	35	1801	2.74604	2.28717
A3	36	1801	2.79898	2.33631
A3	37	1801	2.84263	2.37615
A3	38	1801	2.87145	2.40117
A3	39	1801	2.90077	2.42669
A3	40	1801	2.92838	2.45049
A4	1	1801	0.307832	-0.0190423
A4	2	1801	0.316139	-0.0126918
A4	3	1801	0.324132	-0.00665479
A4	4	1801	0.332452	-0.000292162
A4	5	1801	0.335574	0.000873447
A4	6	1801	0.342377	0.00571973
A4	7	1801	0.342918	0.00430461
A4	8	1801	0.344258	0.00368771
A4	9	1801	0.341339	-0.00118767
A4	10	1801	0.340127	-0.00435654
A4	11	1801	0.340748	-0.005692
A4	12	1801	0.347046	-0.00135053
A4	13	1801	0.352175	0.0018217
A4	14	1801	0.353593	0.00128348
A4	15	1801	0.353906	-0.000360467
A4	16	1801	0.359056	0.00283355
A4	17	1801	0.358424	0.000244751
A4	18	1801	0.363402	0.00326544
A4	19	1801	0.363663	0.00157071
A4	20	1801	0.361631	-0.00241829
A4	21	1801	0.364176	-0.00182948
A4	22	1801	0.366416	-0.00154616
A4	23	1801	0.369586	-0.000332901
A4	24	1801	0.372292	0.000415864
A4	25	1801	0.375935	0.00210254
A4	26	1801	0.388776	0.0129867
A4	27	1801	0.409723	0.0319777
A4	28	1801	0.44964	0.069938
A4	29	1801	0.524601	0.142942
A4	30	1801	0.656254	0.272639
A4	31	1801	0.871849	0.486278
A4	32	1801	1.1902	0.802671
A4	33	1801	1.52866	1.13918
A4	34	1801	1.7437	1.35225
A4	35	1801	1.91356	1.52016
A4	36	1801	2.10865	1.7133
A4	37	1801	2.26828	1.87097
A4	38	1801	2.39139	1.99212
A4	39	1801	2.47957	2.07834
A4	40	1801	2.55294	2.14975
A5	1	1801	0.314936	-0.0107779
A5	2	1801	0.320731	-0.0071314
A5	3	1801	0.327927	-0.00208458
A5	4	1801	0.332695	0.000535164
A5	5	1801	0.337529	0.00322021
A5	6	1801	0.346188	0.00973023
A5	7	1801	0.341327	0.00272061
A5	8	1801	0.342194	0.00143917
A5	9	1801	0.34285	-5.32375e-05
A5	10	1801	0.339246	-0.00580565
A5	11	1801	0.336912	-0.0102888
A5	12	1801	0.343843	-0.00550646
A5	13	1801	0.351073	-0.000425217
A5	14	1801	0.355821	0.00217468
A5	15	1801	0.355111	-0.000683866
A5	16	1801	0.359787	0.00184278
A5	17	1801	0.35974	-0.000352398
A5	18	1801	0.362388	0.000147211
A5	19	1801	0.366342	0.00195237
A5	20	1801	0.364775	-0.00176401
A5	21	1801	0.36711	-0.00157693
A5	22	1801	0.366691	-0.00414517
A5	23	1801	0.374766	0.00178162
A5	24	1801	0.376114	0.000980563
A5	25	1801	0.383444	0.00616176
A5	26	1801	0.392247	0.0128164
A5	27	1801	0.417455	0.0358758
A5	28	1801	0.461196	0.0774683
A5	29	1801	0.540025	0.154149
A5	30	1801	0.684864	0.296839
A5	31	1801	0.917935	0.527761
A5	32	1801	1.25512	0.862795
A5	33	1801	1.61489	1.22042
A5	34	1801	1.86449	1.46787
A5	35	1801	2.02713	1.62836
A5	36	1801	2.22225	1.82134
A5	37	1801	2.38317	1.9801
A5	38	1801	2.50401	2.0988
A5	39	1801	2.59041	2.18305
A5	40	1801	2.66206	2.25255
A6	1	1801	0.231482	-0.0180294
A6	2	1801	0.239758	-0.0120961
A6	3	1801	0.248896	-0.00530109
A6	4	1801	0.255045	-0.00149471
A6	5	1801	0.264398	0.00551593
A6	6	1801	0.266021	0.00479618
A6	7	1801	0.270552	0.0069845
A6	8	1801	0.269763	0.00385237
A6	9	1801	0.272172	0.00391847
A6	10	1801	0.271959	0.00136345
A6	11	1801	0.269551	-0.00338701
A6	12	1801	0.270702	-0.00457919
A6	13	1801	0.270585	-0.00703842
A6	14	1801	0.27493	-0.005036
A6	15	1801	0.276486	-0.00582317
A6	16	1801	0.285268	0.00061592
A6	17	1801	0.28623	-0.000764822
A6	18	1801	0.288991	-0.000346577
A6	19	1801	0.288871	-0.00280914
A6	20	1801	0.292845	-0.0011775
A6	21	1801	0.296538	0.000172609
A6	22	1801	0.296937	-0.00177125
A6	23	1801	0.303258	0.00220718
A6	24	1801	0.30659	0.00319716
A6	25	1801	0.312641	0.0069051
A6	26	1801	0.321765	0.0136863
A6	27	1801	0.342908	0.0324867
A6	28	1801	0.377	0.0642362
A6	29	1801	0.456055	0.140948
A6	30	1801	0.586268	0.268819
A6	31	1801	0.806358	0.486566
A6	32	1801	1.14435	0.822217
A6	33	1801	1.54274	1.21826
A6	34	1801	1.86395	1.53713
A6	35	1801	2.05248	1.72332
A6	36	1801	2.25735	1.92585
A6	37	1801	2.44176	2.10791
A6	38	1801	2.57627	2.24008
A6	39	1801	2.68492	2.34639
A6	40	1801	2.76421	2.42334
A7	1	1801	0.280908	-0.025517
A7	2	1801	0.29098	-0.0178351
A7	3	1801	0.29926	-0.0119468
A7	4	1801	0.304811	-0.00878627
A7	5	1801	0.315157	-0.000831039
A7	6	1801	0.318807	0.000428715
A7	7	1801	0.323706	0.00293605
A7	8	1801	0.325984	0.00282362
A7	9	1801	0.324026	-0.00152515
A7	10	1801	0.32719	-0.000751953
A7	11	1801	0.330968	0.000635146
A7	12	1801	0.336072	0.00334899
A7	13	1801	0.341166	0.0060521
A7	14	1801	0.346323	0.00881809
A7	15	1801	0.346281	0.00638563
A7	16	1801	0.345433	0.00314676
A7	17	1801	0.349257	0.00457975
A7	18	1801	0.349841	0.00277252
A7	19	1801	0.351861	0.00240224
A7	20	1801	0.354033	0.00218299
A7	21	1801	0.35258	-0.00166049
A7	22	1801	0.356007	-0.000624875
A7	23	1801	0.355272	-0.00375
A7	24	1801	0.359719	-0.00169386
A7	25	1801	0.357804	-0.0059999
A7	26	1801	0.361063	-0.00513142
A7	27	1801	0.364774	-0.00381087
A7	28	1801	0.370886	-8.97732e-05
A7	29	1801	0.389086	0.0157195
A7	30	1801	0.419136	0.0433782
A7	31	1801	0.475161	0.0970125
A7	32	1801	0.579094	0.198555
A7	33	1801	0.766324	0.383394
A7	34	1801	1.05828	0.672956
A7	35	1801	1.42612	1.03841
A7	36	1801	1.70605	1.31595
A7	37	1801	1.93463	1.54214
A7	38	1801	2.19186	1.79697
A7	39	1801	2.40639	2.00912
A7	40	1801	2.56484	2.16517
A8	1	1801	0.306787	-0.0232291
A8	2	1801	0.313057	-0.0192993
A8	3	1801	0.321708	-0.0129872
A8	4	1801	0.325661	-0.0113745
A8	5	1801	0.334451	-0.00492367
A8	6	1801	0.339982	-0.00173306
A8	7	1801	0.344448	0.00039316
A8	8	1801	0.343279	-0.00311585
A8	9	1801	0.34951	0.00077622
A8	10	1801	0.357711	0.00663715
A8	11	1801	0.359341	0.00592768
A8	12	1801	0.363063	0.00730971
A8	13	1801	0.365722	0.00762842
A8	14	1801	0.367579	0.00714652
A8	15	1801	0.370988	0.00821503
A8	16	1801	0.37178	0.00666722
A8	17	1801	0.374411	0.00695917
A8	18	1801	0.374254	0.00446183
A8	19	1801	0.374251	0.00211946
A8	20	1801	0.376442	0.00197046
A8	21	1801	0.375955	-0.000855722
A8	22	1801	0.377041	-0.00211016
A8	23	1801	0.378339	-0.0031515
A8	24	1801	0.375371	-0.00845905
A8	25	1801	0.3784	-0.00777014
A8	26	1801	0.383666	-0.00484387
A8	27	1801	0.385962	-0.00488732
A8	28	1801	0.392063	-0.00112653
A8	29	1801	0.404584	0.00905446
A8	30	1801	0.438064	0.040195
A8	31	1801	0.489368	0.0891593
A8	32	1801	0.588666	0.186117
A8	33	1801	0.76381	0.358922
A8	34	1801	1.04108	0.63385
A8	35	1801	1.41739	1.00782
A8	36	1801	1.78737	1.37546
A8	37	1801	2.03584	1.62159
A8	38	1801	2.21421	1.79763
A8	39	1801	2.40688	1.98796
A8	40	1801	2.56771	2.14645
A9	1	1801	0.29995	-0.0742277
A9	2	1801	0.336336	-0.0401676
A9	3	1801	0.369777	-0.00905334
A9	4	1801	0.370241	-0.0109167
A9	5	1801	0.372924	-0.0105596
A9	6	1801	0.372861	-0.0129503
A9	7	1801	0.396274	0.00813659
A9	8	1801	0.396799	0.0063344
A9	9	1801	0.394029	0.00123811
A9	10	1801	0.40234	0.00722228
A9	11	1801	0.409315	0.011871
A9	12	1801	0.408949	0.00917774
A9	13	1801	0.405604	0.00350646
A9	14	1801	0.403233	-0.0011918
A9	15	1801	0.420824	0.0140726
A9	16	1801	0.402414	-0.00666365
A9	17	1801	0.426685	0.0152807
A9	18	1801	0.410895	-0.00283655
A9	19	1801	0.428117	0.0120588
A9	20	1801	0.411676	-0.00670861
A9	21	1801	0.414815	-0.00589683
A9	22	1801	0.41555	-0.00748853
A9	23	1801	0.432691	0.00732625
A9	24	1801	0.42193	-0.00576204
A9	25	1801	0.419104	-0.0109146
A9	26	1801	0.425902	-0.00644317
A9	27	1801	0.435832	0.00116076
A9	28	1801	0.440255	0.00325609
A9	29	1801	0.470936	0.031611
A9	30	1801	0.51313	0.0714784
A9	31	1801	0.595645	0.151666
A9	32	1801	0.74682	0.300515
A9	33	1801	0.996155	0.547523
A9	34	1801	1.32316	0.872204
A9	35	1801	1.59658	1.14329
A9	36	1801	1.77807	1.32246
A9	37	1801	1.98595	1.52801
A9	38	1801	2.16378	1.70352
A9	39	1801	2.30188	1.83928
A9	40	1801	2.40113	1.93621
A10	1	1801	0.302378	-0.0160825
A10	2	1801	0.307128	-0.0159092
A10	3	1801	0.320905	-0.00670892
A10	4	1801	0.322765	-0.00942524
A10	5	1801	0.334051	-0.00271612
A10	6	1801	0.337357	-0.00398693
A10	7	1801	0.348104	0.00218373
A10	8	1801	0.354019	0.00352208
A10	9	1801	0.361921	0.00684747
A10	10	1801	0.364753	0.00510305
A10	11	1801	0.370757	0.00653063
A10	12	1801	0.378414	0.00961122
A10	13	1801	0.378469	0.00508952
A10	14	1801	0.380169	0.00221323
A10	15	1801	0.385521	0.00298811
A10	16	1801	0.386655	-0.000454098
A10	17	1801	0.385206	-0.00648055
A10	18	1801	0.391681	-0.00458168
A10	19	1801	0.396157	-0.00468242
A10	20	1801	0.400363	-0.00505308
A10	21	1801	0.405433	-0.00455944
A10	22	1801	0.423952	0.00938261
A10	23	1801	0.458116	0.0389707
A10	24	1801	0.521155	0.0974325
A10	25	1801	0.634042	0.205743
A10	26	1801	0.827387	0.394512
A10	27	1801	1.1308	0.693351
A10	28	1801	1.50713	1.0651
A10	29	1801	1.84441	1.3978
A10	30	1801	2.047	1.59582
A10	31	1801	2.21363	1.75788
A10	32	1801	2.38968	1.92934
A10	33	1801	2.53168	2.06677
A10	34	1801	2.63921	2.16972
A10	35	1801	2.70911	2.23505
A10	36	1801	2.78141	2.30277
A10	37	1801	2.82839	2.34518
A10	38	1801	2.87051	2.38272
A10	39	1801	2.89665	2.40427
A10	40	1801	2.93079	2.43385
A11	1	1801	0.277067	-0.0130493
A11	2	1801	0.284659	-0.0093943
A11	3	1801	0.290784	-0.00720616
A11	4	1801	0.297346	-0.00458221
A11	5	1801	0.303615	-0.00224979
A11	6	1801	0.306483	-0.00331933
A11	7	1801	0.313357	-0.000381985
A11	8	1801	0.320988	0.00331133
A11	9	1801	0.32479	0.00317615
A11	10	1801	0.333025	0.00747397
A11	11	1801	0.335635	0.00614667
A11	12	1801	0.340281	0.00685546
A11	13	1801	0.342538	0.00517598
A11	14	1801	0.344942	0.00364229
A11	15	1801	0.345641	0.000403826
A11	16	1801	0.346863	-0.00231078
A11	17	1801	0.349571	-0.00354033
A11	18	1801	0.350829	-0.0062192
A11	19	1801	0.35461	-0.0063759
A11	20	1801	0.355861	-0.0090612
A11	21	1801	0.366554	-0.00230597
A11	22	1801	0.380722	0.00792508
A11	23	1801	0.410776	0.0340422
A11	24	1801	0.466919	0.0862471
A11	25	1801	0.56354	0.178932
A11	26	1801	0.743125	0.35458
A11	27	1801	1.02716	0.634673
A11	28	1801	1.39732	1.0009
A11	29	1801	1.76033	1.35997
A11	30	1801	1.98663	1.58233
A11	31	1801	2.16299	1.75476
A11	32	1801	2.35744	1.94527
A11	33	1801	2.51272	2.09661
A11	34	1801	2.62529	2.20525
A11	35	1801	2.71823	2.29425
A11	36	1801	2.78612	2.3582
A11	37	1801	2.83507	2.40322
A11	38	1801	2.87802	2.44223
A11	39	1801	2.91105	2.47132
A11	40	1801	2.94008	2.49641
A12	1	1801	0.281389	-0.00961076
A12	2	1801	0.287993	-0.00635615
A12	3	1801	0.289559	-0.00813953
A12	4	1801	0.296174	-0.00487372
A12	5	1801	0.2991	-0.00529674
A12	6	1801	0.308843	0.00109659
A12	7	1801	0.316753	0.00565747
A12	8	1801	0.319278	0.00483349
A12	9	1801	0.318781	0.000987369
A12	10	1801	0.327722	0.00657902
A12	11	1801	0.328077	0.00358498
A12	12	1801	0.32999	0.00214838
A12	13	1801	0.334023	0.00283239
A12	14	1801	0.337482	0.00294164
A12	15	1801	0.339947	0.00205757
A12	16	1801	0.338494	-0.00274446
A12	17	1801	0.343672	-0.000915618
A12	18	1801	0.344913	-0.00302361
A12	19	1801	0.346092	-0.00519433
A12	20	1801	0.352105	-0.0025309
A12	21	1801	0.361283	0.00329833
A12	22	1801	0.375527	0.0141926
A12	23	1801	0.404267	0.0395835
A12	24	1801	0.457626	0.0895934
A12	25	1801	0.550429	0.179047
A12	26	1801	0.71811	0.343379
A12	27	1801	0.980373	0.602293
A12	28	1801	1.35112	0.969691
A12	29	1801	1.68726	1.30248
A12	30	1801	1.91248	1.52435
A12	31	1801	2.08251	1.69104
A12	32	1801	2.29142	1.89659
A12	33	1801	2.43259	2.03441
A12	34	1801	2.54714	2.14562
A12	35	1801	2.63451	2.22963
A12	36	1801	2.69654	2.28832
A12	37	1801	2.75999	2.34842
A12	38	1801	2.80557	2.39065
A12	39	1801	2.83819	2.41992
A12	40	1801	2.87276	2.45114
B1	1	1801	0.334118	-0.0202545
B1	2	1801	0.34343	-0.0158346
B1	3	1801	0.349169	-0.0149885
B1	4	1801	0.353124	-0.0159254
B1	5	1801	0.357877	-0.0160647
B1	6	1801	0.373024	-0.00581011
B1	7	1801	0.390487	0.00676004
B1	8	1801	0.402478	0.0138587
B1	9	1801	0.407379	0.0138672
B1	10	1801	0.412581	0.0141771
B1	11	1801	0.417929	0.0146327
B1	12	1801	0.417222	0.00903341
B1	13	1801	0.41846	0.00537894
B1	14	1801	0.422473	0.00449861
B1	15	1801	0.427854	0.00498785
B1	16	1801	0.428599	0.000840448
B1	17	1801	0.427957	-0.00469417
B1	18	1801	0.435359	-0.00218472
B1	19	1801	0.436687	-0.00574898
B1	20	1801	0.435432	-0.0118964
B1	21	1801	0.441499	-0.010722
B1	22	1801	0.446401	-0.0107123
B1	23	1801	0.458392	-0.0036135
B1	24	1801	0.484459	0.0175608
B1	25	1801	0.517975	0.046184
B1	26	1801	0.598136	0.121453
B1	27	1801	0.733643	0.252068
B1	28	1801	0.948761	0.462293
B1	29	1801	1.25753	0.76617
B1	30	1801	1.56958	1.07332
B1	31	1801	1.76028	1.25914
B1	32	1801	1.92228	1.41625
B1	33	1801	2.09176	1.58083
B1	34	1801	2.22093	1.70511
B1	35	1801	2.32435	1.80364
B1	36	1801	2.40524	1.87964
B1	37	1801	2.46703	1.93653
B1	38	1801	2.51901	1.98362
B1	39	1801	2.56635	2.02606
B1	40	1801	2.59111	2.04593
B2	1	1801	0.311292	-0.0178981
B2	2	1801	0.319735	-0.0126225
B2	3	1801	0.326661	-0.00886443
B2	4	1801	0.33101	-0.00768258
B2	5	1801	0.336733	-0.00512667
B2	6	1801	0.345627	0.000599166
B2	7	1801	0.351856	0.00366077
B2	8	1801	0.35385	0.00248778
B2	9	1801	0.361345	0.00681461
B2	10	1801	0.364506	0.00680901
B2	11	1801	0.363752	0.00288686
B2	12	1801	0.369851	0.00581861
B2	13	1801	0.371471	0.00427151
B2	14	1801	0.372312	0.00194423
B2	15	1801	0.373674	0.000139346
B2	16	1801	0.379401	0.00269833
B2	17	1801	0.380018	0.000148627
B2	18	1801	0.37915	-0.00388749
B2	19	1801	0.382564	-0.00364052
B2	20	1801	0.387312	-0.00205976
B2	21	1801	0.385522	-0.00701737
B2	22	1801	0.394696	-0.00101086
B2	23	1801	0.40607	0.0071951
B2	24	1801	0.430052	0.0280096
B2	25	1801	0.46665	0.0614406
B2	26	1801	0.538846	0.130469
B2	27	1801	0.673534	0.261989
B2	28	1801	0.897157	0.482445
B2	29	1801	1.22567	0.80779
B2	30	1801	1.61088	1.18984
B2	31	1801	1.88837	1.46416
B2	32	1801	2.06789	1.64051
B2	33	1801	2.26141	1.83086
B2	34	1801	2.43775	2.00403
B2	35	1801	2.5686	2.13172
B2	36	1801	2.65966	2.21961
B2	37	1801	2.74753	2.30431
B2	38	1801	2.80608	2.35969
B2	39	1801	2.85142	2.40186
B2	40	1801	2.89033	2.4376
B3	1	1801	0.366526	-0.0255156
B3	2	1801	0.383204	-0.0146682
B3	3	1801	0.388189	-0.0155131
B3	4	1801	0.40075	-0.00878274
B3	5	1801	0.409642	-0.00572218
B3	6	1801	0.422369	0.00117429
B3	7	1801	0.432447	0.00542143
B3	8	1801	0.436719	0.00386329
B3	9	1801	0.44458	0.00589376
B3	10	1801	0.452767	0.00824982
B3	11	1801	0.461728	0.0113803
B3	12	1801	0.461857	0.00567876
B3	13	1801	0.468196	0.00618696
B3	14	1801	0.469392	0.00155229
B3	15	1801	0.476984	0.00331332
B3	16	1801	0.481304	0.00180292
B3	17	1801	0.484033	-0.00129851
B3	18	1801	0.487805	-0.00335694
B3	19	1801	0.48921	-0.00778243
B3	20	1801	0.494372	-0.0084513
B3	21	1801	0.505044	-0.00360994
B3	22	1801	0.511874	-0.0026103
B3	23	1801	0.52908	0.00876442
B3	24	1801	0.561391	0.035245
B3	25	1801	0.614624	0.0826471
B3	26	1801	0.71597	0.178163
B3	27	1801	0.88287	0.339232
B3	28	1801	1.14535	0.595885
B3	29	1801	1.48475	0.929446
B3	30	1801	1.77848	1.21735
B3	31	1801	1.94082	1.37386
B3	32	1801	2.1101	1.5373
B3	33	1801	2.28759	1.70896
B3	34	1801	2.41701	1.83255
B3	35	1801	2.5135	1.92321
B3	36	1801	2.59881	2.00269
B3	37	1801	2.6545	2.05256
B3	38	1801	2.70365	2.09588
B3	39	1801	2.75335	2.13975
B3	40	1801	2.78513	2.16569
B4	1	1801	0.286051	-0.028898
B4	2	1801	0.29852	-0.0193206
B4	3	1801	0.305923	-0.0148083
B4	4	1801	0.308783	-0.014839
B4	5	1801	0.318738	-0.00777512
B4	6	1801	0.322906	-0.00649862
B4	7	1801	0.334993	0.00269742
B4	8	1801	0.341793	0.00660565
B4	9	1801	0.347085	0.00900715
B4	10	1801	0.349462	0.00849328
B4	11	1801	0.353878	0.0100179
B4	12	1801	0.356907	0.0101552
B4	13	1801	0.359218	0.0095753
B4	14	1801	0.357866	0.00533196
B4	15	1801	0.362332	0.00690693
B4	16	1801	0.363211	0.00489486
B4	17	1801	0.36418	0.00297255
B4	18	1801	0.363842	-0.000256403
B4	19	1801	0.364416	-0.00257281
B4	20	1801	0.36713	-0.00275049
B4	21	1801	0.365236	-0.00753531
B4	22	1801	0.370547	-0.00511514
B4	23	1801	0.37082	-0.00773399
B4	24	1801	0.374672	-0.00677301
B4	25	1801	0.384621	0.000284786
B4	26	1801	0.399572	0.012345
B4	27	1801	0.430514	0.0403956
B4	28	1801	0.487742	0.094733
B4	29	1801	0.588634	0.192734
B4	30	1801	0.771999	0.373208
B4	31	1801	1.05869	0.657012
B4	32	1801	1.44106	1.03648
B4	33	1801	1.79963	1.39216
B4	34	1801	1.99855	1.5882
B4	35	1801	2.18723	1.77399
B4	36	1801	2.39296	1.97682
B4	37	1801	2.54784	2.12881
B4	38	1801	2.66154	2.23962
B4	39	1801	2.74639	2.32158
B4	40	1801	2.81217	2.38446
B5	1	1801	0.285692	-0.0242147
B5	2	1801	0.296506	-0.0156845
B5	3	1801	0.306415	-0.00806003
B5	4	1801	0.312634	-0.00412463
B5	5	1801	0.317884	-0.00115936
B5	6	1801	0.326117	0.00478994
B5	7	1801	0.328455	0.00484326
B5	8	1801	0.324285	-0.00161058
B5	9	1801	0.328326	0.000146213
B5	10	1801	0.331924	0.00145978
B5	11	1801	0.333793	0.00104479
B5	12	1801	0.337875	0.0028425
B5	13	1801	0.338343	0.00102659
B5	14	1801	0.343045	0.00344434
B5	15	1801	0.343916	0.00203186
B5	16	1801	0.345367	0.00119833
B5	17	1801	0.347492	0.00103883
B5	18	1801	0.349218	0.000481292
B5	19	1801	0.350138	-0.000882994
B5	20	1801	0.352753	-0.000552362
B5	21	1801	0.353964	-0.0016256
B5	22	1801	0.352612	-0.00526186
B5	23	1801	0.359087	-0.00107031
B5	24	1801	0.359849	-0.00259291
B5	25	1801	0.369904	0.00517862
B5	26	1801	0.386719	0.0197095
B5	27	1801	0.414744	0.0454496
B5	28	1801	0.4699	0.0983214
B5	29	1801	0.569073	0.195211
B5	30	1801	0.747674	0.371528
B5	31	1801	1.03466	0.656234
B5	32	1801	1.43029	1.04957
B5	33	1801	1.83587	1.45288
B5	34	1801	2.08612	1.70083
B5	35	1801	2.27228	1.88471
B5	36	1801	2.47937	2.08952
B5	37	1801	2.6437	2.25156
B5	38	1801	2.76683	2.37241
B5	39	1801	2.85884	2.46213
B5	40	1801	2.93453	2.53555
B6	1	1801	0.270154	-0.0223107
B6	2	1801	0.280702	-0.0140115
B6	3	1801	0.284939	-0.0120228
B6	4	1801	0.290389	-0.00882016
B6	5	1801	0.29622	-0.00523805
B6	6	1801	0.299713	-0.00399307
B6	7	1801	0.310299	0.00434496
B6	8	1801	0.313228	0.00502542
B6	9	1801	0.314736	0.00428536
B6	10	1801	0.319816	0.0071177
B6	11	1801	0.318859	0.00391215
B6	12	1801	0.323091	0.00589647
B6	13	1801	0.32704	0.00759683
B6	14	1801	0.326381	0.00468951
B6	15	1801	0.328233	0.00429376
B6	16	1801	0.327887	0.00169966
B6	17	1801	0.329508	0.00107267
B6	18	1801	0.33247	0.00178628
B6	19	1801	0.330843	-0.00208848
B6	20	1801	0.333811	-0.00136877
B6	21	1801	0.334004	-0.00342377
B6	22	1801	0.335737	-0.00393927
B6	23	1801	0.33553	-0.00639473
B6	24	1801	0.339741	-0.00443166
B6	25	1801	0.346592	0.000171628
B6	26	1801	0.362672	0.0140033
B6	27	1801	0.389557	0.0386404
B6	28	1801	0.435448	0.0822825
B6	29	1801	0.526613	0.1712
B6	30	1801	0.688925	0.331263
B6	31	1801	0.952529	0.59262
B6	32	1801	1.32726	0.965107
B6	33	1801	1.74	1.3756
B6	34	1801	2.01819	1.65154
B6	35	1801	2.19269	1.82379
B6	36	1801	2.40095	2.0298
B6	37	1801	2.58224	2.20884
B6	38	1801	2.6985	2.32286
B6	39	1801	2.78802	2.41013
B6	40	1801	2.8679	2.48776
B7	1	1801	0.283981	-0.02622
B7	2	1801	0.290016	-0.0219179
B7	3	1801	0.292507	-0.0211611
B7	4	1801	0.298394	-0.0170075
B7	5	1801	0.310233	-0.00690143
B7	6	1801	0.315864	-0.00300436
B7	7	1801	0.327488	0.00688664
B7	8	1801	0.331708	0.00937353
B7	9	1801	0.332117	0.00804888
B7	10	1801	0.334666	0.00886442
B7	11	1801	0.336447	0.00891175
B7	12	1801	0.334661	0.00539189
B7	13	1801	0.337343	0.00634053
B7	14	1801	0.339009	0.00627297
B7	15	1801	0.340964	0.00649527
B7	16	1801	0.343103	0.00690088
B7	17	1801	0.34068	0.00274414
B7	18	1801	0.343408	0.0037385
B7	19	1801	0.340848	-0.00055479
B7	20	1801	0.340697	-0.00243943
B7	21	1801	0.343724	-0.00114529
B7	22	1801	0.340287	-0.00631659
B7	23	1801	0.345096	-0.00324042
B7	24	1801	0.34499	-0.00508014
B7	25	1801	0.34536	-0.00644383
B7	26	1801	0.348429	-0.00510815
B7	27	1801	0.353704	-0.00156641
B7	28	1801	0.363616	0.00661165
B7	29	1801	0.385769	0.0270315
B7	30	1801	0.426077	0.0656064
B7	31	1801	0.499724	0.13752
B7	32	1801	0.63746	0.273522
B7	33	1801	0.864335	0.498664
B7	34	1801	1.10215	0.734741
B7	35	1801	1.34968	0.980538
B7	36	1801	1.62176	1.25089
B7	37	1801	1.85147	1.47886
B7	38	1801	2.01013	1.63579
B7	39	1801	2.12933	1.75326
B7	40	1801	2.22187	1.84407
B8	1	1801	0.291187	-0.0176683
B8	2	1801	0.297283	-0.0131562
B8	3	1801	0.305071	-0.00695302
B8	4	1801	0.31144	-0.00216764
B8	5	1801	0.310555	-0.00463706
B8	6	1801	0.320697	0.00392104
B8	7	1801	0.317857	-0.000502846
B8	8	1801	0.321432	0.00148795
B8	9	1801	0.317437	-0.0040903
B8	10	1801	0.320387	-0.0027244
B8	11	1801	0.32712	0.00242443
B8	12	1801	0.329796	0.00351639
B8	13	1801	0.332077	0.0042132
B8	14	1801	0.331597	0.00214873
B8	15	1801	0.334962	0.0039296
B8	16	1801	0.337939	0.00532298
B8	17	1801	0.338306	0.00410606
B8	18	1801	0.337774	0.00198995
B8	19	1801	0.338888	0.00152017
B8	20	1801	0.340939	0.00198667
B8	21	1801	0.341157	0.000621037
B8	22	1801	0.340204	-0.00191574
B8	23	1801	0.341398	-0.00230567
B8	24	1801	0.343466	-0.00182254
B8	25	1801	0.343401	-0.00347136
B8	26	1801	0.344868	-0.00358788
B8	27	1801	0.34703	-0.00300975
B8	28	1801	0.351531	-9.35584e-05
B8	29	1801	0.363465	0.0102567
B8	30	1801	0.379352	0.0245594
B8	31	1801	0.410751	0.0543743
B8	32	1801	0.475893	0.117933
B8	33	1801	0.590054	0.23051
B8	34	1801	0.795369	0.434241
B8	35	1801	1.10293	0.740215
B8	36	1801	1.40531	1.04101
B8	37	1801	1.65918	1.2933
B8	38	1801	1.95874	1.59128
B8	39	1801	2.21614	1.84709
B8	40	1801	2.42774	2.0571
B9	1	1801	0.282559	-0.0175797
B9	2	1801	0.288876	-0.013163
B9	3	1801	0.293234	-0.0107047
B9	4	1801	0.299752	-0.00608691
B9	5	1801	0.302547	-0.00519238
B9	6	1801	0.307098	-0.00254163
B9	7	1801	0.310155	-0.00138528
B9	8	1801	0.314284	0.000843137
B9	9	1801	0.319548	0.00420682
B9	10	1801	0.320332	0.00309136
B9	11	1801	0.326096	0.00695489
B9	12	1801	0.327409	0.00636705
B9	13	1801	0.329733	0.00679115
B9	14	1801	0.331418	0.00657563
B9	15	1801	0.333298	0.00655583
B9	16	1801	0.331451	0.0028076
B9	17	1801	0.332839	0.00229558
B9	18	1801	0.334813	0.00236977
B9	19	1801	0.333444	-0.000899738
B9	20	1801	0.335397	-0.000846886
B9	21	1801	0.336158	-0.00198654
B9	22	1801	0.335791	-0.00425353
B9	23	1801	0.335919	-0.00602604
B9	24	1801	0.338581	-0.00526437
B9	25	1801	0.342375	-0.00337102
B9	26	1801	0.347346	-0.000299786
B9	27	1801	0.355467	0.00592048
B9	28	1801	0.368802	0.017355
B9	29	1801	0.406282	0.0529349
B9	30	1801	0.472629	0.117382
B9	31	1801	0.594179	0.237032
B9	32	1801	0.803885	0.444837
B9	33	1801	1.07875	0.717797
B9	34	1801	1.32878	0.965927
B9	35	1801	1.61347	1.24872
B9	36	1801	1.91132	1.54467
B9	37	1801	2.14903	1.78048
B9	38	1801	2.31964	1.94919
B9	39	1801	2.43418	2.06183
B9	40	1801	2.53573	2.16148
B10	1	1801	0.283468	-0.00774097
B10	2	1801	0.291143	-0.00106075
B10	3	1801	0.29524	0.00204255
B10	4	1801	0.295075	0.00088265
B10	5	1801	0.289259	-0.00592839
B10	6	1801	0.28765	-0.00853141
B10	7	1801	0.291779	-0.00539724
B10	8	1801	0.295241	-0.00292984
B10	9	1801	0.303896	0.00473092
B10	10	1801	0.304638	0.0044785
B10	11	1801	0.305029	0.00387483
B10	12	1801	0.304104	0.00195468
B10	13	1801	0.306725	0.00358115
B10	14	1801	0.308262	0.0041235
B10	15	1801	0.307944	0.00281131
B10	16	1801	0.309793	0.00366605
B10	17	1801	0.309423	0.00230108
B10	18	1801	0.308903	0.000787129
B10	19	1801	0.309123	1.18593e-05
B10	20	1801	0.310618	0.000512278
B10	21	1801	0.308783	-0.0023167
B10	22	1801	0.308602	-0.00349281
B10	23	1801	0.310607	-0.00248209
B10	24	1801	0.310377	-0.00370639
B10	25	1801	0.311075	-0.00400318
B10	26	1801	0.316177	0.000104154
B10	27	1801	0.319993	0.00292543
B10	28	1801	0.324175	0.00611286
B10	29	1801	0.343593	0.0245362
B10	30	1801	0.377158	0.0571072
B10	31	1801	0.440467	0.119422
B10	32	1801	0.556189	0.234149
B10	33	1801	0.754346	0.431312
B10	34	1801	1.06787	0.743845
B10	35	1801	1.47629	1.15127
B10	36	1801	1.79925	1.47323
B10	37	1801	2.00008	1.67307
B10	38	1801	2.22575	1.89775
B10	39	1801	2.43222	2.10322
B10	40	1801	2.58369	2.25369
B11	1	1801	0.281106	-0.023687
B11	2	1801	0.287951	-0.0187375
B11	3	1801	0.29015	-0.0184348
B11	4	1801	0.294195	-0.0162863
B11	5	1801	0.298704	-0.0136734
B11	6	1801	0.30545	-0.00882324
B11	7	1801	0.322112	0.00594204
B11	8	1801	0.328017	0.00995139
B11	9	1801	0.3318	0.0118383
B11	10	1801	0.335185	0.0133267
B11	11	1801	0.332278	0.00852341
B11	12	1801	0.337573	0.0119222
B11	13	1801	0.334375	0.00682775
B11	14	1801	0.336168	0.00672498
B11	15	1801	0.336805	0.00546538
B11	16	1801	0.338905	0.00566966
B11	17	1801	0.337829	0.00269743
B11	18	1801	0.336619	-0.000408843
B11	19	1801	0.339596	0.000671778
B11	20	1801	0.339282	-0.0015382
B11	21	1801	0.339981	-0.0027354
B11	22	1801	0.341552	-0.00306103
B11	23	1801	0.341985	-0.00452347
B11	24	1801	0.342419	-0.00598555
B11	25	1801	0.34365	-0.00665069
B11	26	1801	0.344757	-0.00744005
B11	27	1801	0.3502	-0.00389382
B11	28	1801	0.360216	0.00422676
B11	29	1801	0.38068	0.0227946
B11	30	1801	0.416375	0.0565926
B11	31	1801	0.484261	0.122583
B11	32	1801	0.607955	0.24438
B11	33	1801	0.822949	0.457479
B11	34	1801	1.15469	0.787321
B11	35	1801	1.56969	1.20043
B11	36	1801	1.92231	1.55115
B11	37	1801	2.1269	1.75384
B11	38	1801	2.3102	1.93525
B11	39	1801	2.49758	2.12073
B11	40	1801	2.64862	2.26988
B12	1	1801	0.234461	-0.0322038
B12	2	1801	0.24413	-0.0243769
B12	3	1801	0.25124	-0.0191089
B12	4	1801	0.251321	-0.0208697
B12	5	1801	0.258829	-0.0152038
B12	6	1801	0.266665	-0.00920964
B12	7	1801	0.275668	-0.00204904
B12	8	1801	0.2898	0.0102418
B12	9	1801	0.293439	0.0120381
B12	10	1801	0.297838	0.0145957
B12	11	1801	0.298231	0.0131466
B12	12	1801	0.301012	0.0140851
B12	13	1801	0.2995	0.0107311
B12	14	1801	0.297532	0.00692122
B12	15	1801	0.300057	0.00760446
B12	16	1801	0.302831	0.00853673
B12	17	1801	0.297387	0.00125036
B12	18	1801	0.304989	0.00701075
B12	19	1801	0.301925	0.00210477
B12	20	1801	0.302043	0.000380819
B12	21	1801	0.302141	-0.00136337
B12	22	1801	0.301133	-0.00421367
B12	23	1801	0.301455	-0.00573294
B12	24	1801	0.305402	-0.00362855
B12	25	1801	0.298861	-0.0120113
B12	26	1801	0.305784	-0.00692995
B12	27	1801	0.30623	-0.00832664
B12	28	1801	0.315199	-0.00119954
B12	29	1801	0.333645	0.0154048
B12	30	1801	0.366126	0.0460435
B12	31	1801	0.414174	0.0922504
B12	32	1801	0.51702	0.193254
B12	33	1801	0.696083	0.370475
B12	34	1801	0.981143	0.653693
B12	35	1801	1.37543	1.04614
B12	36	1801	1.76624	1.4351
B12	37	1801	2.00392	1.67094
B12	38	1801	2.18398	1.84916
B12	39	1801	2.38392	2.04726
B12	40	1801	2.54166	2.20316
C1	1	0905	0.149131	-0.00643639
C1	2	0905	0.153958	-0.00559759
C1	3	0905	0.160551	-0.00299275
C1	4	0905	0.16521	-0.00232256
C1	5	0905	0.169395	-0.00212558
C1	6	0905	0.173535	-0.001974
C1	7	0905	0.18232	0.00282277
C1	8	0905	0.184688	0.00120223
C1	9	0905	0.191301	0.00382678
C1	10	0905	0.195077	0.00361356
C1	11	0905	0.19833	0.00287861
C1	12	0905	0.202624	0.00318444
C1	13	0905	0.20547	0.00204195
C1	14	0905	0.2054	-0.0020173
C1	15	0905	0.20859	-0.00281574
C1	16	0905	0.210071	-0.0053224
C1	17	0905	0.214726	-0.00465582
C1	18	0905	0.225602	0.00223133
C1	19	0905	0.239102	0.011743
C1	20	0905	0.272447	0.0410992
C1	21	0905	0.330779	0.0954424
C1	22	0905	0.439452	0.200127
C1	23	0905	0.623963	0.38065
C1	24	0905	0.91607	0.668768
C1	25	0905	1.30017	1.04888
C1	26	0905	1.69862	1.44334
C1	27	0905	2.03942	1.78016
C1	28	0905	2.2792	2.01594
C1	29	0905	2.44642	2.17918
C1	30	0905	2.55141	2.28018
C1	31	0905	2.62424	2.34902
C1	32	0905	2.68922	2.41001
C1	33	0905	2.72778	2.44458
C1	34	0905	2.76042	2.47324
C1	35	0905	2.78349	2.49231
C1	36	0905	2.8041	2.50894
C1	37	0905	2.80474	2.50559
C1	38	0905	2.82351	2.52037
C1	39	0905	2.82446	2.51733
C1	40	0905	2.82794	2.51682
C2	1	0905	0.312504	-0.0108633
C2	2	0905	0.320859	-0.00678858
C2	3	0905	0.325655	-0.0062735
C2	4	0905	0.32941	-0.00679905
C2	5	0905	0.338325	-0.0021649
C2	6	0905	0.345094	0.000324081
C2	7	0905	0.354538	0.00548731
C2	8	0905	0.361339	0.00800738
C2	9	0905	0.365171	0.00755893
C2	10	0905	0.362594	0.000701273
C2	11	0905	0.368781	0.00260762
C2	12	0905	0.370794	0.000340418
C2	13	0905	0.375186	0.000451472
C2	14	0905	0.377203	-0.00181191
C2	15	0905	0.382729	-0.000566434
C2	16	0905	0.381302	-0.00627431
C2	17	0905	0.390268	-0.00158836
C2	18	0905	0.397883	0.00174554
C2	19	0905	0.412515	0.0120976
C2	20	0905	0.445346	0.040648
C2	21	0905	0.505038	0.0960594
C2	22	0905	0.613047	0.199787
C2	23	0905	0.802919	0.385379
C2	24	0905	1.09928	0.677461
C2	25	0905	1.48984	1.06374
C2	26	0905	1.89771	1.46732
C2	27	0905	2.24872	1.81405
C2	28	0905	2.50645	2.06751
C2	29	0905	2.67052	2.22729
C2	30	0905	2.78282	2.33532
C2	31	0905	2.86236	2.41058
C2	32	0905	2.92689	2.47083
C2	33	0905	2.95196	2.49162
C2	34	0905	2.99291	2.52828
C2	35	0905	3.01598	2.54708
C2	36	0905	3.03918	2.56599
C2	37	0905	3.04613	2.56866
C2	38	0905	3.0724	2.59065
C2	39	0905	3.07311	2.58708
C2	40	0905	3.08083	2.59052
C3	1	0905	0.255625	-0.0167477
C3	2	0905	0.264587	-0.0116383
C3	3	0905	0.275855	-0.00422311
C3	4	0905	0.2826	-0.00133099
C3	5	0905	0.287942	0.000158343
C3	6	0905	0.28958	-0.00205679
C3	7	0905	0.299283	0.00379405
C3	8	0905	0.301627	0.00228443
C3	9	0905	0.303511	0.000315647
C3	10	0905	0.309945	0.00289714
C3	11	0905	0.313051	0.00215091
C3	12	0905	0.3165	0.00174645
C3	13	0905	0.319413	0.000807245
C3	14	0905	0.321221	-0.00123751
C3	15	0905	0.32479	-0.00152124
C3	16	0905	0.327898	-0.00226634
C3	17	0905	0.332499	-0.00151825
C3	18	0905	0.34069	0.00282012
C3	19	0905	0.356472	0.0147493
C3	20	0905	0.389701	0.044125
C3	21	0905	0.454386	0.104958
C3	22	0905	0.561243	0.207962
C3	23	0905	0.761013	0.403879
C3	24	0905	1.07735	0.716363
C3	25	0905	1.48952	1.12468
C3	26	0905	1.92735	1.55866
C3	27	0905	2.30645	1.93391
C3	28	0905	2.5836	2.2072
C3	29	0905	2.75736	2.37711
C3	30	0905	2.88406	2.49995
C3	31	0905	2.9618	2.57385
C3	32	0905	3.01607	2.62426
C3	33	0905	3.06307	2.6674
C3	34	0905	3.10266	2.70315
C3	35	0905	3.11713	2.71376
C3	36	0905	3.13542	2.7282
C3	37	0905	3.15264	2.74157
C3	38	0905	3.15464	2.73972
C3	39	0905	3.15562	2.73684
C3	40	0905	3.16994	2.7473
C4	1	0905	0.334422	-0.0144056
C4	2	0905	0.340991	-0.0106135
C4	3	0905	0.347404	-0.00697584
C4	4	0905	0.356543	-0.000613111
C4	5	0905	0.360901	0.000969061
C4	6	0905	0.36625	0.00354138
C4	7	0905	0.36784	0.00235608
C4	8	0905	0.368544	0.000283804
C4	9	0905	0.370264	-0.000771887
C4	10	0905	0.372574	-0.00123845
C4	11	0905	0.379623	0.00303499
C4	12	0905	0.380753	0.00138817
C4	13	0905	0.385204	0.00306398
C4	14	0905	0.385432	0.000515644
C4	15	0905	0.388646	0.000953793
C4	16	0905	0.389171	-0.00129724
C4	17	0905	0.392433	-0.000811316
C4	18	0905	0.392378	-0.00364275
C4	19	0905	0.397098	-0.00169833
C4	20	0905	0.402515	0.000942002
C4	21	0905	0.409749	0.00540087
C4	22	0905	0.422768	0.0156435
C4	23	0905	0.451531	0.0416304
C4	24	0905	0.505433	0.0927563
C4	25	0905	0.608905	0.193452
C4	26	0905	0.786849	0.368621
C4	27	0905	1.08528	0.664276
C4	28	0905	1.49207	1.06829
C4	29	0905	1.94204	1.51549
C4	30	0905	2.34873	1.9194
C4	31	0905	2.65625	2.22414
C4	32	0905	2.85402	2.41914
C4	33	0905	2.983	2.54534
C4	34	0905	3.08776	2.64732
C4	35	0905	3.14833	2.70512
C4	36	0905	3.19962	2.75363
C4	37	0905	3.23948	2.79072
C4	38	0905	3.27026	2.81872
C4	39	0905	3.28855	2.83423
C4	40	0905	3.31303	2.85594
C5	1	0905	0.306553	-0.0122726
C5	2	0905	0.312376	-0.0091902
C5	3	0905	0.317443	-0.00686326
C5	4	0905	0.325864	-0.00118176
C5	5	0905	0.330322	0.000536529
C5	6	0905	0.334721	0.00219611
C5	7	0905	0.33865	0.00338496
C5	8	0905	0.337939	-6.59589e-05
C5	9	0905	0.338949	-0.0017958
C5	10	0905	0.343829	0.000343989
C5	11	0905	0.348298	0.0020734
C5	12	0905	0.352228	0.00326338
C5	13	0905	0.354885	0.00318099
C5	14	0905	0.355697	0.00125287
C5	15	0905	0.357771	0.000587009
C5	16	0905	0.359825	-9.87038e-05
C5	17	0905	0.362415	-0.000249346
C5	18	0905	0.362723	-0.00268124
C5	19	0905	0.367053	-0.00109059
C5	20	0905	0.368091	-0.00279259
C5	21	0905	0.376088	0.0024647
C5	22	0905	0.388219	0.0118559
C5	23	0905	0.409982	0.0308793
C5	24	0905	0.450498	0.0686549
C5	25	0905	0.528944	0.144361
C5	26	0905	0.671666	0.284343
C5	27	0905	0.902378	0.512316
C5	28	0905	1.2345	0.841701
C5	29	0905	1.62794	1.23239
C5	30	0905	1.99259	1.59431
C5	31	0905	2.25928	1.85826
C5	32	0905	2.45375	2.04998
C5	33	0905	2.58279	2.17628
C5	34	0905	2.67941	2.27017
C5	35	0905	2.74547	2.33349
C5	36	0905	2.80541	2.39069
C5	37	0905	2.84742	2.42996
C5	38	0905	2.88332	2.46312
C5	39	0905	2.90538	2.48243
C5	40	0905	2.93121	2.50553
C6	1	0905	0.304185	-0.0307913
C6	2	0905	0.31085	-0.0264761
C6	3	0905	0.323111	-0.0165653
C6	4	0905	0.335547	-0.00647952
C6	5	0905	0.344882	0.000505194
C6	6	0905	0.352926	0.00619896
C6	7	0905	0.356338	0.00726095
C6	8	0905	0.356533	0.00510634
C6	9	0905	0.357622	0.00384564
C6	10	0905	0.358868	0.00274106
C6	11	0905	0.363245	0.00476837
C6	12	0905	0.365413	0.00458598
C6	13	0905	0.363743	0.00056545
C6	14	0905	0.366486	0.000958907
C6	15	0905	0.368413	0.000536079
C6	16	0905	0.369857	-0.000370918
C6	17	0905	0.368919	-0.00365844
C6	18	0905	0.36964	-0.00528778
C6	19	0905	0.373855	-0.00342268
C6	20	0905	0.378339	-0.0012883
C6	21	0905	0.381324	-0.000653439
C6	22	0905	0.392152	0.00782375
C6	23	0905	0.414751	0.0280731
C6	24	0905	0.451607	0.0625791
C6	25	0905	0.532319	0.14094
C6	26	0905	0.671445	0.277717
C6	27	0905	0.908695	0.512617
C6	28	0905	1.26098	0.862551
C6	29	0905	1.68275	1.28197
C6	30	0905	2.09638	1.69326
C6	31	0905	2.40932	2.00385
C6	32	0905	2.63594	2.22811
C6	33	0905	2.78367	2.37349
C6	34	0905	2.89545	2.48293
C6	35	0905	2.95998	2.5451
C6	36	0905	3.02404	2.60681
C6	37	0905	3.06318	2.64361
C6	38	0905	3.09229	2.67036
C6	39	0905	3.11297	2.68869
C6	40	0905	3.13411	2.70748
C7	1	0905	0.327901	-0.0191133
C7	2	0905	0.334895	-0.0147341
C7	3	0905	0.342733	-0.00951152
C7	4	0905	0.349096	-0.00576286
C7	5	0905	0.355087	-0.00238726
C7	6	0905	0.36072	0.000630111
C7	7	0905	0.36831	0.00560523
C7	8	0905	0.369665	0.00434555
C7	9	0905	0.373632	0.005697
C7	10	0905	0.376239	0.00568917
C7	11	0905	0.376982	0.00381736
C7	12	0905	0.376945	0.00116478
C7	13	0905	0.380866	0.00247129
C7	14	0905	0.383098	0.00208777
C7	15	0905	0.383034	-0.000590735
C7	16	0905	0.383367	-0.00287362
C7	17	0905	0.384187	-0.00466789
C7	18	0905	0.388452	-0.00301826
C7	19	0905	0.391389	-0.00269612
C7	20	0905	0.398211	0.00151039
C7	21	0905	0.409609	0.0102933
C7	22	0905	0.43492	0.0329889
C7	23	0905	0.479169	0.0746235
C7	24	0905	0.56798	0.160819
C7	25	0905	0.722499	0.312723
C7	26	0905	0.986913	0.574522
C7	27	0905	1.37847	0.963466
C7	28	0905	1.84001	1.42238
C7	29	0905	2.27688	1.85665
C7	30	0905	2.61978	2.19693
C7	31	0905	2.85374	2.42827
C7	32	0905	3.01573	2.58765
C7	33	0905	3.11883	2.68814
C7	34	0905	3.20044	2.76713
C7	35	0905	3.25142	2.81549
C7	36	0905	3.3053	2.86675
C7	37	0905	3.33998	2.89883
C7	38	0905	3.3585	2.91473
C7	39	0905	3.38492	2.93853
C7	40	0905	3.39089	2.94189
C8	1	0905	0.31592	-0.0136058
C8	2	0905	0.323332	-0.00903955
C8	3	0905	0.329016	-0.00620228
C8	4	0905	0.335338	-0.0027267
C8	5	0905	0.338383	-0.00252819
C8	6	0905	0.342326	-0.00143209
C8	7	0905	0.349771	0.00316704
C8	8	0905	0.352685	0.00323404
C8	9	0905	0.356323	0.00402556
C8	10	0905	0.360588	0.00544445
C8	11	0905	0.360126	0.00213642
C8	12	0905	0.363457	0.00262068
C8	13	0905	0.362915	-0.000767781
C8	14	0905	0.368658	0.00212886
C8	15	0905	0.370926	0.00154986
C8	16	0905	0.369169	-0.00305314
C8	17	0905	0.371754	-0.00331453
C8	18	0905	0.377345	-0.000570272
C8	19	0905	0.37705	-0.00371191
C8	20	0905	0.385941	0.00233298
C8	21	0905	0.401915	0.0154607
C8	22	0905	0.42918	0.0398789
C8	23	0905	0.48231	0.0901629
C8	24	0905	0.573935	0.178941
C8	25	0905	0.751062	0.353221
C8	26	0905	1.03761	0.636919
C8	27	0905	1.43813	1.0346
C8	28	0905	1.89492	1.48855
C8	29	0905	2.30567	1.89644
C8	30	0905	2.61965	2.20758
C8	31	0905	2.82857	2.41365
C8	32	0905	2.9698	2.55204
C8	33	0905	3.06757	2.64696
C8	34	0905	3.1428	2.71934
C8	35	0905	3.18422	2.75791
C8	36	0905	3.23314	2.80399
C8	37	0905	3.25408	2.82209
C8	38	0905	3.28305	2.84821
C8	39	0905	3.30151	2.86382
C8	40	0905	3.31285	2.87231
C9	1	0905	0.315216	-0.00974002
C9	2	0905	0.318832	-0.0089116
C9	3	0905	0.32617	-0.00436201
C9	4	0905	0.32994	-0.00337993
C9	5	0905	0.33643	0.000322242
C9	6	0905	0.338706	-0.00018925
C9	7	0905	0.341326	-0.000356705
C9	8	0905	0.347131	0.00265983
C9	9	0905	0.349513	0.00225458
C9	10	0905	0.351853	0.00180606
C9	11	0905	0.356409	0.00357457
C9	12	0905	0.356109	0.000486426
C9	13	0905	0.363569	0.00515878
C9	14	0905	0.36034	-0.000858305
C9	15	0905	0.365171	0.0011851
C9	16	0905	0.365229	-0.00154524
C9	17	0905	0.368361	-0.00120081
C9	18	0905	0.370646	-0.00170396
C9	19	0905	0.371286	-0.00385139
C9	20	0905	0.375866	-0.00205895
C9	21	0905	0.393005	0.0122915
C9	22	0905	0.414102	0.0306015
C9	23	0905	0.459642	0.0733535
C9	24	0905	0.54991	0.160834
C9	25	0905	0.705285	0.313421
C9	26	0905	0.96579	0.571138
C9	27	0905	1.34039	0.942949
C9	28	0905	1.77459	1.37436
C9	29	0905	2.1713	1.76828
C9	30	0905	2.48279	2.07699
C9	31	0905	2.69067	2.28208
C9	32	0905	2.82905	2.41767
C9	33	0905	2.92936	2.51519
C9	34	0905	3.01454	2.59759
C9	35	0905	3.05396	2.63422
C9	36	0905	3.09746	2.67493
C9	37	0905	3.13572	2.7104
C9	38	0905	3.1552	2.7271
C9	39	0905	3.17996	2.74906
C9	40	0905	3.19679	2.76311
C10	1	0905	0.31802	-0.00777078
C10	2	0905	0.33013	0.00192252
C10	3	0905	0.332506	0.00188028
C10	4	0905	0.336043	0.00300009
C10	5	0905	0.334249	-0.00121106
C10	6	0905	0.330377	-0.00750058
C10	7	0905	0.336756	-0.00353957
C10	8	0905	0.341588	-0.00112509
C10	9	0905	0.346651	0.00152039
C10	10	0905	0.351212	0.0036642
C10	11	0905	0.3521	0.00213393
C10	12	0905	0.354323	0.00193999
C10	13	0905	0.357004	0.00220325
C10	14	0905	0.358707	0.00148929
C10	15	0905	0.360937	0.00130143
C10	16	0905	0.360496	-0.00155726
C10	17	0905	0.362865	-0.00160615
C10	18	0905	0.364295	-0.00259313
C10	19	0905	0.369058	-0.000248264
C10	20	0905	0.382032	0.0103088
C10	21	0905	0.402883	0.0287422
C10	22	0905	0.440953	0.0643944
C10	23	0905	0.516878	0.137902
C10	24	0905	0.655092	0.273698
C10	25	0905	0.893344	0.509533
C10	26	0905	1.25254	0.86631
C10	27	0905	1.71362	1.32497
C10	28	0905	2.17671	1.78564
C10	29	0905	2.54208	2.1486
C10	30	0905	2.80639	2.41049
C10	31	0905	2.97793	2.57961
C10	32	0905	3.09455	2.69381
C10	33	0905	3.17322	2.77007
C10	34	0905	3.24105	2.83548
C10	35	0905	3.2694	2.86141
C10	36	0905	3.3021	2.89169
C10	37	0905	3.32973	2.91691
C10	38	0905	3.34245	2.92721
C10	39	0905	3.34724	2.92958
C10	40	0905	3.36204	2.94196
C11	1	0905	0.28147	-0.0136277
C11	2	0905	0.28553	-0.0129188
C11	3	0905	0.294118	-0.00768341
C11	4	0905	0.296417	-0.00873591
C11	5	0905	0.305766	-0.00273899
C11	6	0905	0.310026	-0.00183029
C11	7	0905	0.323141	0.00793278
C11	8	0905	0.326011	0.0074507
C11	9	0905	0.32802	0.00610867
C11	10	0905	0.331368	0.00610507
C11	11	0905	0.334035	0.00542013
C11	12	0905	0.333377	0.00140996
C11	13	0905	0.33435	-0.000968712
C11	14	0905	0.340371	0.00170027
C11	15	0905	0.340096	-0.00192631
C11	16	0905	0.341134	-0.00423996
C11	17	0905	0.344165	-0.00456122
C11	18	0905	0.348635	-0.00344277
C11	19	0905	0.349705	-0.00572461
C11	20	0905	0.361971	0.00319025
C11	21	0905	0.378224	0.0160908
C11	22	0905	0.406545	0.0410598
C11	23	0905	0.461873	0.0930362
C11	24	0905	0.572002	0.199814
C11	25	0905	0.759541	0.384001
C11	26	0905	1.05206	0.673171
C11	27	0905	1.44113	1.05889
C11	28	0905	1.84401	1.45841
C11	29	0905	2.19399	1.80504
C11	30	0905	2.4441	2.0518
C11	31	0905	2.61888	2.22323
C11	32	0905	2.74596	2.34696
C11	33	0905	2.83349	2.43114
C11	34	0905	2.89741	2.4917
C11	35	0905	2.94348	2.53442
C11	36	0905	2.98785	2.57544
C11	37	0905	3.01659	2.60082
C11	38	0905	3.04365	2.62454
C11	39	0905	3.05613	2.63367
C11	40	0905	3.06504	2.63922
C12	1	0905	0.290415	-0.0142189
C12	2	0905	0.295618	-0.0128346
C12	3	0905	0.301408	-0.0108627
C12	4	0905	0.308734	-0.00735541
C12	5	0905	0.314259	-0.00564853
C12	6	0905	0.321758	-0.00196757
C12	7	0905	0.335871	0.00832605
C12	8	0905	0.33874	0.00737696
C12	9	0905	0.342335	0.00715396
C12	10	0905	0.345857	0.006857
C12	11	0905	0.349061	0.00624267
C12	12	0905	0.349188	0.00255182
C12	13	0905	0.354347	0.00389205
C12	14	0905	0.355755	0.00148216
C12	15	0905	0.357995	-9.67477e-05
C12	16	0905	0.359576	-0.00233399
C12	17	0905	0.361008	-0.00472019
C12	18	0905	0.362289	-0.00725825
C12	19	0905	0.369726	-0.00363934
C12	20	0905	0.379564	0.00238021
C12	21	0905	0.39836	0.0173583
C12	22	0905	0.431467	0.0466463
C12	23	0905	0.495331	0.106692
C12	24	0905	0.614098	0.221641
C12	25	0905	0.818479	0.422204
C12	26	0905	1.13677	0.736675
C12	27	0905	1.53186	1.12795
C12	28	0905	1.931	1.52327
C12	29	0905	2.26101	1.84947
C12	30	0905	2.48545	2.07008
C12	31	0905	2.6417	2.22252
C12	32	0905	2.75109	2.32808
C12	33	0905	2.8225	2.39567
C12	34	0905	2.87821	2.44757
C12	35	0905	2.92349	2.48903
C12	36	0905	2.95531	2.51703
C12	37	0905	2.98083	2.53874
C12	38	0905	3.0019	2.55598
C12	39	0905	3.00962	2.55989
C12	40	0905	3.02086	2.5673
D1	1	0905	0.327247	-0.0170768
D1	2	0905	0.335646	-0.0147308
D1	3	0905	0.343697	-0.0127316
D1	4	0905	0.35041	-0.0120708
D1	5	0905	0.361522	-0.0070116
D1	6	0905	0.366914	-0.00767122
D1	7	0905	0.378081	-0.00255654
D1	8	0905	0.39104	0.00435039
D1	9	0905	0.411937	0.0191945
D1	10	0905	0.415305	0.0165107
D1	11	0905	0.420261	0.015414
D1	12	0905	0.421794	0.0108949
D1	13	0905	0.423966	0.00701499
D1	14	0905	0.427148	0.00414434
D1	15	0905	0.429232	0.000176249
D1	16	0905	0.431143	-0.00396496
D1	17	0905	0.433499	-0.0076617
D1	18	0905	0.436278	-0.0109353
D1	19	0905	0.440169	-0.0130963
D1	20	0905	0.443644	-0.0156729
D1	21	0905	0.455619	-0.00975072
D1	22	0905	0.479358	0.00793571
D1	23	0905	0.52239	0.0449157
D1	24	0905	0.599661	0.116135
D1	25	0905	0.745874	0.256296
D1	26	0905	0.981286	0.485655
D1	27	0905	1.32249	0.820806
D1	28	0905	1.71151	1.20378
D1	29	0905	2.05022	1.53643
D1	30	0905	2.27561	1.75577
D1	31	0905	2.4023	1.87641
D1	32	0905	2.51224	1.98029
D1	33	0905	2.57655	2.03856
D1	34	0905	2.62375	2.0797
D1	35	0905	2.6605	2.1104
D1	36	0905	2.69634	2.14018
D1	37	0905	2.71244	2.15024
D1	38	0905	2.72509	2.15683
D1	39	0905	2.7502	2.17589
D1	40	0905	2.74892	2.16855
D2	1	0905	0.276848	-0.0159288
D2	2	0905	0.284748	-0.0116859
D2	3	0905	0.289642	-0.0104483
D2	4	0905	0.292953	-0.0107952
D2	5	0905	0.301662	-0.00574302
D2	6	0905	0.313783	0.00272128
D2	7	0905	0.323039	0.00832018
D2	8	0905	0.326617	0.00824116
D2	9	0905	0.331631	0.00959844
D2	10	0905	0.331563	0.00587305
D2	11	0905	0.333879	0.00453224
D2	12	0905	0.33638	0.00337641
D2	13	0905	0.337572	0.000911269
D2	14	0905	0.341633	0.00131535
D2	15	0905	0.341712	-0.00226317
D2	16	0905	0.343588	-0.00404375
D2	17	0905	0.346923	-0.00436637
D2	18	0905	0.347717	-0.00722948
D2	19	0905	0.353088	-0.00551479
D2	20	0905	0.364737	0.00247691
D2	21	0905	0.382679	0.0167621
D2	22	0905	0.419992	0.0504176
D2	23	0905	0.488734	0.115503
D2	24	0905	0.611224	0.234336
D2	25	0905	0.828404	0.447859
D2	26	0905	1.15753	0.773325
D2	27	0905	1.57122	1.18336
D2	28	0905	1.98442	1.59291
D2	29	0905	2.32277	1.92759
D2	30	0905	2.54379	2.14496
D2	31	0905	2.69337	2.29088
D2	32	0905	2.79566	2.38952
D2	33	0905	2.87271	2.46291
D2	34	0905	2.9234	2.50994
D2	35	0905	2.95836	2.54125
D2	36	0905	2.98715	2.56638
D2	37	0905	3.01717	2.59274
D2	38	0905	3.03625	2.60816
D2	39	0905	3.04105	2.60931
D2	40	0905	3.05655	2.62115
D3	1	0905	0.326971	-0.0161419
D3	2	0905	0.335631	-0.0123493
D3	3	0905	0.344906	-0.0079414
D3	4	0905	0.353875	-0.00384037
D3	5	0905	0.360988	-0.00159426
D3	6	0905	0.368462	0.00101266
D3	7	0905	0.373179	0.00086248
D3	8	0905	0.378246	0.00106191
D3	9	0905	0.385138	0.00308626
D3	10	0905	0.392285	0.00536589
D3	11	0905	0.396771	0.00498447
D3	12	0905	0.401384	0.00473016
D3	13	0905	0.403745	0.00222402
D3	14	0905	0.410458	0.00406958
D3	15	0905	0.413494	0.00223909
D3	16	0905	0.412785	-0.00333774
D3	17	0905	0.416598	-0.00439155
D3	18	0905	0.421655	-0.00420237
D3	19	0905	0.426396	-0.00432883
D3	20	0905	0.43474	-0.000852129
D3	21	0905	0.456459	0.0160004
D3	22	0905	0.489468	0.0441412
D3	23	0905	0.55686	0.106666
D3	24	0905	0.678808	0.223747
D3	25	0905	0.894028	0.4341
D3	26	0905	1.22256	0.75776
D3	27	0905	1.64446	1.1748
D3	28	0905	2.08758	1.61305
D3	29	0905	2.44922	1.96982
D3	30	0905	2.70028	2.21601
D3	31	0905	2.86215	2.37301
D3	32	0905	2.96773	2.47373
D3	33	0905	3.0591	2.56023
D3	34	0905	3.10955	2.60581
D3	35	0905	3.1539	2.6453
D3	36	0905	3.1873	2.67383
D3	37	0905	3.20543	2.68709
D3	38	0905	3.22657	2.70337
D3	39	0905	3.24275	2.71468
D3	40	0905	3.24828	2.71535
D4	1	0905	0.297509	-0.0205808
D4	2	0905	0.308022	-0.0133442
D4	3	0905	0.314372	-0.0102713
D4	4	0905	0.32088	-0.00703985
D4	5	0905	0.32722	-0.00397721
D4	6	0905	0.339118	0.00464454
D4	7	0905	0.343988	0.00623709
D4	8	0905	0.343512	0.00248445
D4	9	0905	0.350642	0.00633801
D4	10	0905	0.354992	0.00741119
D4	11	0905	0.356517	0.00565914
D4	12	0905	0.35634	0.002205
D4	13	0905	0.358771	0.00135933
D4	14	0905	0.361897	0.00120886
D4	15	0905	0.360129	-0.00383578
D4	16	0905	0.362597	-0.00464539
D4	17	0905	0.365653	-0.00486604
D4	18	0905	0.370884	-0.00291208
D4	19	0905	0.375257	-0.00181508
D4	20	0905	0.388002	0.00765317
D4	21	0905	0.41201	0.0283836
D4	22	0905	0.449693	0.0627898
D4	23	0905	0.530419	0.140239
D4	24	0905	0.670511	0.277055
D4	25	0905	0.914217	0.517483
D4	26	0905	1.27371	0.873701
D4	27	0905	1.73005	1.32677
D4	28	0905	2.16894	1.76237
D4	29	0905	2.52163	2.11179
D4	30	0905	2.77274	2.35963
D4	31	0905	2.93475	2.51836
D4	32	0905	3.03988	2.62021
D4	33	0905	3.12514	2.70219
D4	34	0905	3.17915	2.75293
D4	35	0905	3.21488	2.78538
D4	36	0905	3.25773	2.82495
D4	37	0905	3.28777	2.85171
D4	38	0905	3.30578	2.86645
D4	39	0905	3.31613	2.87352
D4	40	0905	3.32737	2.88148
D5	1	0905	0.302734	-0.0169869
D5	2	0905	0.30829	-0.0145809
D5	3	0905	0.320293	-0.00572904
D5	4	0905	0.323307	-0.00586579
D5	5	0905	0.328784	-0.00353905
D5	6	0905	0.335765	0.000291835
D5	7	0905	0.340762	0.00213843
D5	8	0905	0.346876	0.00510129
D5	9	0905	0.350597	0.00567259
D5	10	0905	0.354219	0.00614413
D5	11	0905	0.355512	0.00428641
D5	12	0905	0.358964	0.00458781
D5	13	0905	0.358613	0.00108673
D5	14	0905	0.358018	-0.00265893
D5	15	0905	0.361888	-0.00193979
D5	16	0905	0.363695	-0.00328318
D5	17	0905	0.366412	-0.00371709
D5	18	0905	0.370296	-0.00298278
D5	19	0905	0.376836	0.000406437
D5	20	0905	0.384772	0.00519228
D5	21	0905	0.41152	0.028789
D5	22	0905	0.45473	0.0688488
D5	23	0905	0.532537	0.143506
D5	24	0905	0.675263	0.283081
D5	25	0905	0.915254	0.519921
D5	26	0905	1.27624	0.877757
D5	27	0905	1.71563	1.31399
D5	28	0905	2.13707	1.73228
D5	29	0905	2.46946	2.06152
D5	30	0905	2.69191	2.28083
D5	31	0905	2.84523	2.43099
D5	32	0905	2.94839	2.531
D5	33	0905	3.0191	2.59857
D5	34	0905	3.07588	2.6522
D5	35	0905	3.11465	2.68781
D5	36	0905	3.14185	2.71186
D5	37	0905	3.1666	2.73346
D5	38	0905	3.19228	2.75599
D5	39	0905	3.20632	2.76688
D5	40	0905	3.21558	2.77299
D6	1	0905	0.309681	-0.0152909
D6	2	0905	0.318515	-0.0102127
D6	3	0905	0.325379	-0.00710467
D6	4	0905	0.329572	-0.00666711
D6	5	0905	0.337938	-0.00205743
D6	6	0905	0.339486	-0.00426569
D6	7	0905	0.352653	0.00514594
D6	8	0905	0.358919	0.00765593
D6	9	0905	0.361916	0.00689621
D6	10	0905	0.364528	0.00575296
D6	11	0905	0.365483	0.00295205
D6	12	0905	0.370199	0.00391142
D6	13	0905	0.372959	0.00291528
D6	14	0905	0.372848	-0.000950822
D6	15	0905	0.374712	-0.00284285
D6	16	0905	0.378693	-0.00261847
D6	17	0905	0.380517	-0.00455022
D6	18	0905	0.384651	-0.00417253
D6	19	0905	0.392124	-0.000455496
D6	20	0905	0.404901	0.00856597
D6	21	0905	0.428454	0.0283633
D6	22	0905	0.478033	0.0741857
D6	23	0905	0.565023	0.15742
D6	24	0905	0.725506	0.314147
D6	25	0905	0.991225	0.576109
D6	26	0905	1.38821	0.969335
D6	27	0905	1.85375	1.43113
D6	28	0905	2.30334	1.87695
D6	29	0905	2.64829	2.21816
D6	30	0905	2.88563	2.45174
D6	31	0905	3.03918	2.60153
D6	32	0905	3.14781	2.70641
D6	33	0905	3.22895	2.78378
D6	34	0905	3.28394	2.83502
D6	35	0905	3.31697	2.8643
D6	36	0905	3.35733	2.9009
D6	37	0905	3.38049	2.92031
D6	38	0905	3.39252	2.92858
D6	39	0905	3.40552	2.93782
D6	40	0905	3.41784	2.94639
D7	1	0905	0.285513	-0.0151073
D7	2	0905	0.291193	-0.0115246
D7	3	0905	0.299017	-0.00579793
D7	4	0905	0.304329	-0.00258318
D7	5	0905	0.309387	0.000377234
D7	6	0905	0.315958	0.00485143
D7	7	0905	0.318668	0.00546402
D7	8	0905	0.319204	0.00390184
D7	9	0905	0.317619	0.000219917
D7	10	0905	0.314935	-0.00456103
D7	11	0905	0.320939	-0.000655074
D7	12	0905	0.323777	8.53966e-05
D7	13	0905	0.326415	0.00062655
D7	14	0905	0.326457	-0.00142927
D7	15	0905	0.32932	-0.000663827
D7	16	0905	0.334582	0.00250094
D7	17	0905	0.332339	-0.00183908
D7	18	0905	0.336662	0.000386891
D7	19	0905	0.337488	-0.000884831
D7	20	0905	0.343689	0.00321841
D7	21	0905	0.355393	0.0128255
D7	22	0905	0.376854	0.032189
D7	23	0905	0.418988	0.0722255
D7	24	0905	0.490305	0.141445
D7	25	0905	0.633342	0.282385
D7	26	0905	0.86546	0.512406
D7	27	0905	1.22488	0.869728
D7	28	0905	1.66803	1.31078
D7	29	0905	2.10896	1.74961
D7	30	0905	2.45406	2.09262
D7	31	0905	2.69579	2.33225
D7	32	0905	2.86803	2.50239
D7	33	0905	2.98511	2.61738
D7	34	0905	3.05917	2.68934
D7	35	0905	3.12223	2.7503
D7	36	0905	3.16703	2.793
D7	37	0905	3.1962	2.82007
D7	38	0905	3.22765	2.84943
D7	39	0905	3.24601	2.86569
D7	40	0905	3.24957	2.86715
D8	1	0905	0.298504	-0.0119348
D8	2	0905	0.306598	-0.00607349
D8	3	0905	0.311078	-0.0038277
D8	4	0905	0.31702	-0.000118294
D8	5	0905	0.319506	0.000134283
D8	6	0905	0.324064	0.00245854
D8	7	0905	0.323223	-0.000615508
D8	8	0905	0.326941	0.000869455
D8	9	0905	0.329792	0.00148672
D8	10	0905	0.32893	-0.00160833
D8	11	0905	0.334662	0.00189037
D8	12	0905	0.335683	0.000677778
D8	13	0905	0.338394	0.00115611
D8	14	0905	0.339086	-0.000385593
D8	15	0905	0.343568	0.00186305
D8	16	0905	0.342662	-0.00127653
D8	17	0905	0.345606	-0.000564995
D8	18	0905	0.347642	-0.000762194
D8	19	0905	0.349261	-0.00137716
D8	20	0905	0.355656	0.00278456
D8	21	0905	0.368353	0.013248
D8	22	0905	0.389441	0.0321031
D8	23	0905	0.434004	0.074433
D8	24	0905	0.510693	0.148889
D8	25	0905	0.656388	0.292351
D8	26	0905	0.904671	0.5384
D8	27	0905	1.27244	0.903938
D8	28	0905	1.72576	1.35503
D8	29	0905	2.16846	1.79549
D8	30	0905	2.51579	2.14059
D8	31	0905	2.7622	2.38476
D8	32	0905	2.91853	2.53885
D8	33	0905	3.03101	2.6491
D8	34	0905	3.10087	2.71674
D8	35	0905	3.15859	2.77221
D8	36	0905	3.19787	2.80927
D8	37	0905	3.22662	2.83578
D8	38	0905	3.26583	2.87276
D8	39	0905	3.28462	2.88931
D8	40	0905	3.29311	2.89558
D9	1	0905	0.280492	-0.024369
D9	2	0905	0.284834	-0.0219684
D9	3	0905	0.296848	-0.0118953
D9	4	0905	0.305798	-0.00488669
D9	5	0905	0.312306	-0.000319697
D9	6	0905	0.317797	0.00323053
D9	7	0905	0.319949	0.00344111
D9	8	0905	0.325012	0.00656317
D9	9	0905	0.324321	0.0039309
D9	10	0905	0.323926	0.00159535
D9	11	0905	0.327768	0.00349569
D9	12	0905	0.330375	0.00416168
D9	13	0905	0.332444	0.0042895
D9	14	0905	0.331344	0.00124828
D9	15	0905	0.3291	-0.00293701
D9	16	0905	0.330452	-0.00352573
D9	17	0905	0.333275	-0.00264349
D9	18	0905	0.335346	-0.00251425
D9	19	0905	0.336567	-0.00323401
D9	20	0905	0.343898	0.00215541
D9	21	0905	0.35857	0.014887
D9	22	0905	0.380458	0.0348332
D9	23	0905	0.420141	0.0725755
D9	24	0905	0.499571	0.150064
D9	25	0905	0.646986	0.295539
D9	26	0905	0.899769	0.54638
D9	27	0905	1.27451	0.919176
D9	28	0905	1.74113	1.38386
D9	29	0905	2.20233	1.84312
D9	30	0905	2.56294	2.20179
D9	31	0905	2.80524	2.44214
D9	32	0905	2.97713	2.61209
D9	33	0905	3.08684	2.71986
D9	34	0905	3.16126	2.79234
D9	35	0905	3.21445	2.84359
D9	36	0905	3.26137	2.88857
D9	37	0905	3.2949	2.92016
D9	38	0905	3.30699	2.93031
D9	39	0905	3.32102	2.9424
D9	40	0905	3.33891	2.95834
D10	1	0905	0.266993	-0.0239551
D10	2	0905	0.270481	-0.0220401
D10	3	0905	0.276785	-0.0173086
D10	4	0905	0.283182	-0.0124851
D10	5	0905	0.285397	-0.0118422
D10	6	0905	0.289624	-0.00918842
D10	7	0905	0.298149	-0.00223705
D10	8	0905	0.305753	0.00379417
D10	9	0905	0.3124	0.00886816
D10	10	0905	0.31595	0.010845
D10	11	0905	0.315519	0.00884132
D10	12	0905	0.318115	0.00986366
D10	13	0905	0.319259	0.00943495
D10	14	0905	0.319709	0.00831195
D10	15	0905	0.321251	0.00828095
D10	16	0905	0.320419	0.00587615
D10	17	0905	0.322188	0.00607249
D10	18	0905	0.323187	0.00549769
D10	19	0905	0.319286	2.42009e-05
D10	20	0905	0.322754	0.00191912
D10	21	0905	0.32347	0.00106165
D10	22	0905	0.322056	-0.00192492
D10	23	0905	0.322439	-0.00311478
D10	24	0905	0.325332	-0.0017951
D10	25	0905	0.323473	-0.00522749
D10	26	0905	0.322011	-0.00826202
D10	27	0905	0.323665	-0.00818116
D10	28	0905	0.326295	-0.00712458
D10	29	0905	0.330612	-0.0043802
D10	30	0905	0.343759	0.00719386
D10	31	0905	0.365269	0.0271307
D10	32	0905	0.405433	0.0657219
D10	33	0905	0.489204	0.14792
D10	34	0905	0.640196	0.297338
D10	35	0905	0.893091	0.54866
D10	36	0905	1.28022	0.934216
D10	37	0905	1.75238	1.4048
D10	38	0905	2.21653	1.86738
D10	39	0905	2.56489	2.21417
D10	40	0905	2.79328	2.44098
D11	1	0905	0.254013	-0.0211054
D11	2	0905	0.263189	-0.0131329
D11	3	0905	0.267124	-0.010402
D11	4	0905	0.271224	-0.0075053
D11	5	0905	0.277152	-0.0027809
D11	6	0905	0.27895	-0.00218672
D11	7	0905	0.283486	0.00114549
D11	8	0905	0.28474	0.00119616
D11	9	0905	0.287402	0.0026547
D11	10	0905	0.28947	0.00351885
D11	11	0905	0.292921	0.00576584
D11	12	0905	0.289532	0.00117358
D11	13	0905	0.295547	0.00598542
D11	14	0905	0.297554	0.00678812
D11	15	0905	0.296406	0.00443697
D11	16	0905	0.292447	-0.000725858
D11	17	0905	0.2988	0.00442355
D11	18	0905	0.297348	0.00176796
D11	19	0905	0.296121	-0.000662795
D11	20	0905	0.300452	0.00246512
D11	21	0905	0.30068	0.00148874
D11	22	0905	0.298837	-0.00155713
D11	23	0905	0.298885	-0.00271354
D11	24	0905	0.300752	-0.00205013
D11	25	0905	0.299902	-0.00410377
D11	26	0905	0.30205	-0.00315893
D11	27	0905	0.305545	-0.000867722
D11	28	0905	0.30352	-0.00409566
D11	29	0905	0.308837	1.6921e-05
D11	30	0905	0.321163	0.0111394
D11	31	0905	0.344871	0.0336439
D11	32	0905	0.384858	0.0724271
D11	33	0905	0.468889	0.155255
D11	34	0905	0.617683	0.302846
D11	35	0905	0.869528	0.553486
D11	36	0905	1.24815	0.930901
D11	37	0905	1.69732	1.37887
D11	38	0905	2.13255	1.8129
D11	39	0905	2.45516	2.1343
D11	40	0905	2.6538	2.33174
D12	1	0905	0.33918	-0.0150923
D12	2	0905	0.345652	-0.00957423
D12	3	0905	0.350475	-0.00570583
D12	4	0905	0.349797	-0.00733854
D12	5	0905	0.351882	-0.0062079
D12	6	0905	0.355909	-0.00313521
D12	7	0905	0.357335	-0.00266394
D12	8	0905	0.360551	-0.000401467
D12	9	0905	0.366048	0.00414092
D12	10	0905	0.366304	0.00344212
D12	11	0905	0.368265	0.00444837
D12	12	0905	0.369196	0.00442528
D12	13	0905	0.372021	0.00629636
D12	14	0905	0.371728	0.00504884
D12	15	0905	0.371045	0.00341138
D12	16	0905	0.374562	0.00597367
D12	17	0905	0.372357	0.00281392
D12	18	0905	0.372027	0.00153007
D12	19	0905	0.373585	0.00213327
D12	20	0905	0.373747	0.00134053
D12	21	0905	0.3731	-0.000260534
D12	22	0905	0.37256	-0.001755
D12	23	0905	0.374078	-0.00119158
D12	24	0905	0.37323	-0.00299375
D12	25	0905	0.374052	-0.00312628
D12	26	0905	0.374117	-0.00401575
D12	27	0905	0.376883	-0.00220466
D12	28	0905	0.376038	-0.00400427
D12	29	0905	0.381309	0.00031275
D12	30	0905	0.391521	0.00957037
D12	31	0905	0.409441	0.026536
D12	32	0905	0.447711	0.0638516
D12	33	0905	0.514773	0.129959
D12	34	0905	0.645217	0.259449
D12	35	0905	0.873738	0.487015
D12	36	0905	1.21077	0.823091
D12	37	0905	1.6363	1.24766
D12	38	0905	2.06476	1.67517
D12	39	0905	2.39836	2.00782
D12	40	0905	2.61323	2.22174
E1	1	2647	0.279199	-0.0239813
E1	2	2647	0.292758	-0.0130361
E1	3	2647	0.297754	-0.0106536
E1	4	2647	0.306367	-0.00465495
E1	5	2647	0.312553	-0.0010833
E1	6	2647	0.317263	0.00101269
E1	7	2647	0.322933	0.00406852
E1	8	2647	0.320777	-0.000701086
E1	9	2647	0.325677	0.00158411
E1	10	2647	0.327048	0.0003409
E1	11	2647	0.331454	0.00213362
E1	12	2647	0.336976	0.00504145
E1	13	2647	0.3408	0.0062515
E1	14	2647	0.340615	0.00345186
E1	15	2647	0.345804	0.00602644
E1	16	2647	0.343868	0.00147699
E1	17	2647	0.346677	0.00167129
E1	18	2647	0.345981	-0.00163824
E1	19	2647	0.348917	-0.00131651
E1	20	2647	0.353264	0.000416547
E1	21	2647	0.353101	-0.00236107
E1	22	2647	0.353169	-0.00490718
E1	23	2647	0.355759	-0.0049313
E1	24	2647	0.362075	-0.00122864
E1	25	2647	0.371155	0.00523663
E1	26	2647	0.385383	0.0168505
E1	27	2647	0.418583	0.0474368
E1	28	2647	0.477968	0.104208
E1	29	2647	0.588692	0.212317
E1	30	2647	0.775841	0.396853
E1	31	2647	1.07772	0.696117
E1	32	2647	1.45664	1.07243
E1	33	2647	1.78636	1.39953
E1	34	2647	2.01519	1.62575
E1	35	2647	2.187	1.79494
E1	36	2647	2.31143	1.91675
E1	37	2647	2.3989	2.00161
E1	38	2647	2.4599	2.06
E1	39	2647	2.49934	2.09682
E1	40	2647	2.52794	2.12281
E2	1	2647	0.334729	-0.0270867
E2	2	2647	0.345016	-0.0198573
E2	3	2647	0.353383	-0.0145468
E2	4	2647	0.364071	-0.00691629
E2	5	2647	0.369054	-0.00499054
E2	6	2647	0.377689	0.000587135
E2	7	2647	0.382198	0.00203865
E2	8	2647	0.384131	0.000914612
E2	9	2647	0.392559	0.00628552
E2	10	2647	0.395294	0.00596307
E2	11	2647	0.396612	0.00422466
E2	12	2647	0.400153	0.00470784
E2	13	2647	0.4062	0.00769822
E2	14	2647	0.406097	0.00453744
E2	15	2647	0.409773	0.00515594
E2	16	2647	0.410555	0.0028816
E2	17	2647	0.414805	0.00407404
E2	18	2647	0.41474	0.000952265
E2	19	2647	0.415595	-0.00125064
E2	20	2647	0.417829	-0.00207344
E2	21	2647	0.416933	-0.00602705
E2	22	2647	0.422556	-0.00346126
E2	23	2647	0.424471	-0.00460297
E2	24	2647	0.425979	-0.00615199
E2	25	2647	0.434892	-0.000296557
E2	26	2647	0.455623	0.0173771
E2	27	2647	0.48664	0.0453374
E2	28	2647	0.5561	0.11174
E2	29	2647	0.674312	0.226895
E2	30	2647	0.884699	0.434225
E2	31	2647	1.21071	0.757179
E2	32	2647	1.61906	1.16247
E2	33	2647	1.95714	1.4975
[truncated: 1,847 more rows]
