# Supplementary material for: Exploring the plasmodesmata callose-binding protein gene family in upland cotton: unraveling insights for enhancing fiber length
Source: PeerJ. 2024 Jun 26;12:e17625. doi: 10.7717/peerj.17625 (PMC11214431; doi:10.7717/peerj.17625)
Supplement: Supplemental Information 5 [file peerj-12-17625-s005.xls]

## Sheet: Sample Setup
Block Type	96fast
Chemistry	SYBR_GREEN
Experiment File Name	S:\LQW\ZHB\2014-4-4.eds
Experiment Run End Time	2012-05-24 01:58:16 AM CST
Instrument Type	sds7500fast
Passive Reference	ROX
Well	Sample Name	Sample Color	Biogroup Name	Biogroup Color	Target Name	Target Color	Task	Reporter	Quencher	Quantity	Comments
A1	jing	RGB(132,193,241)			1230	RGB(139,189,249)	UNKNOWN	SYBR	None
A2	jing	RGB(132,193,241)			1230	RGB(139,189,249)	UNKNOWN	SYBR	None
A3	jing	RGB(132,193,241)			1230	RGB(139,189,249)	UNKNOWN	SYBR	None
A4	ye	RGB(168,255,222)			1230	RGB(139,189,249)	UNKNOWN	SYBR	None
A5	ye	RGB(168,255,222)			1230	RGB(139,189,249)	UNKNOWN	SYBR	None
A6	ye	RGB(168,255,222)			1230	RGB(139,189,249)	UNKNOWN	SYBR	None
A7	hua	RGB(223,221,142)			1230	RGB(139,189,249)	UNKNOWN	SYBR	None
A8	hua	RGB(223,221,142)			1230	RGB(139,189,249)	UNKNOWN	SYBR	None
A9	hua	RGB(223,221,142)			1230	RGB(139,189,249)	UNKNOWN	SYBR	None
A10	5	RGB(247,255,168)			1230	RGB(139,189,249)	UNKNOWN	SYBR	None
A11	5	RGB(247,255,168)			1230	RGB(139,189,249)	UNKNOWN	SYBR	None
A12	5	RGB(247,255,168)			1230	RGB(139,189,249)	UNKNOWN	SYBR	None
B1	10	RGB(180,255,0)			1230	RGB(139,189,249)	UNKNOWN	SYBR	None
B2	10	RGB(180,255,0)			1230	RGB(139,189,249)	UNKNOWN	SYBR	None
B3	10	RGB(180,255,0)			1230	RGB(139,189,249)	UNKNOWN	SYBR	None
B4	15	RGB(255,204,153)			1230	RGB(139,189,249)	UNKNOWN	SYBR	None
B5	15	RGB(255,204,153)			1230	RGB(139,189,249)	UNKNOWN	SYBR	None
B6	15	RGB(255,204,153)			1230	RGB(139,189,249)	UNKNOWN	SYBR	None
B7	20	RGB(253,138,88)			1230	RGB(139,189,249)	UNKNOWN	SYBR	None
B8	20	RGB(253,138,88)			1230	RGB(139,189,249)	UNKNOWN	SYBR	None
B9	20	RGB(253,138,88)			1230	RGB(139,189,249)	UNKNOWN	SYBR	None
B10	water	RGB(213,244,165)			1230	RGB(139,189,249)	NTC	SYBR	None
B11	water	RGB(213,244,165)			1230	RGB(139,189,249)	NTC	SYBR	None
B12	water	RGB(213,244,165)			1230	RGB(139,189,249)	NTC	SYBR	None
C1	jing	RGB(132,193,241)			1095	RGB(208,243,98)	UNKNOWN	SYBR	None
C2	jing	RGB(132,193,241)			1095	RGB(208,243,98)	UNKNOWN	SYBR	None
C3	jing	RGB(132,193,241)			1095	RGB(208,243,98)	UNKNOWN	SYBR	None
C4	ye	RGB(168,255,222)			1095	RGB(208,243,98)	UNKNOWN	SYBR	None
C5	ye	RGB(168,255,222)			1095	RGB(208,243,98)	UNKNOWN	SYBR	None
C6	ye	RGB(168,255,222)			1095	RGB(208,243,98)	UNKNOWN	SYBR	None
C7	hua	RGB(223,221,142)			1095	RGB(208,243,98)	UNKNOWN	SYBR	None
C8	hua	RGB(223,221,142)			1095	RGB(208,243,98)	UNKNOWN	SYBR	None
C9	hua	RGB(223,221,142)			1095	RGB(208,243,98)	UNKNOWN	SYBR	None
C10	5	RGB(247,255,168)			1095	RGB(208,243,98)	UNKNOWN	SYBR	None
C11	5	RGB(247,255,168)			1095	RGB(208,243,98)	UNKNOWN	SYBR	None
C12	5	RGB(247,255,168)			1095	RGB(208,243,98)	UNKNOWN	SYBR	None
D1	10	RGB(180,255,0)			1095	RGB(208,243,98)	UNKNOWN	SYBR	None
D2	10	RGB(180,255,0)			1095	RGB(208,243,98)	UNKNOWN	SYBR	None
D3	10	RGB(180,255,0)			1095	RGB(208,243,98)	UNKNOWN	SYBR	None
D4	15	RGB(255,204,153)			1095	RGB(208,243,98)	UNKNOWN	SYBR	None
D5	15	RGB(255,204,153)			1095	RGB(208,243,98)	UNKNOWN	SYBR	None
D6	15	RGB(255,204,153)			1095	RGB(208,243,98)	UNKNOWN	SYBR	None
D7	20	RGB(253,138,88)			1095	RGB(208,243,98)	UNKNOWN	SYBR	None
D8	20	RGB(253,138,88)			1095	RGB(208,243,98)	UNKNOWN	SYBR	None
D9	20	RGB(253,138,88)			1095	RGB(208,243,98)	UNKNOWN	SYBR	None
D10	water	RGB(213,244,165)			1095	RGB(208,243,98)	NTC	SYBR	None
D11	water	RGB(213,244,165)			1095	RGB(208,243,98)	NTC	SYBR	None
D12	water	RGB(213,244,165)			1095	RGB(208,243,98)	NTC	SYBR	None
E1	jing	RGB(132,193,241)			1416	RGB(244,165,230)	UNKNOWN	SYBR	None
E2	jing	RGB(132,193,241)			1416	RGB(244,165,230)	UNKNOWN	SYBR	None
E3	jing	RGB(132,193,241)			1416	RGB(244,165,230)	UNKNOWN	SYBR	None
E4	ye	RGB(168,255,222)			1416	RGB(244,165,230)	UNKNOWN	SYBR	None
E5	ye	RGB(168,255,222)			1416	RGB(244,165,230)	UNKNOWN	SYBR	None
E6	ye	RGB(168,255,222)			1416	RGB(244,165,230)	UNKNOWN	SYBR	None
E7	hua	RGB(223,221,142)			1416	RGB(244,165,230)	UNKNOWN	SYBR	None
E8	hua	RGB(223,221,142)			1416	RGB(244,165,230)	UNKNOWN	SYBR	None
E9	hua	RGB(223,221,142)			1416	RGB(244,165,230)	UNKNOWN	SYBR	None
E10	5	RGB(247,255,168)			1416	RGB(244,165,230)	UNKNOWN	SYBR	None
E11	5	RGB(247,255,168)			1416	RGB(244,165,230)	UNKNOWN	SYBR	None
E12	5	RGB(247,255,168)			1416	RGB(244,165,230)	UNKNOWN	SYBR	None
F1	10	RGB(180,255,0)			1416	RGB(244,165,230)	UNKNOWN	SYBR	None
F2	10	RGB(180,255,0)			1416	RGB(244,165,230)	UNKNOWN	SYBR	None
F3	10	RGB(180,255,0)			1416	RGB(244,165,230)	UNKNOWN	SYBR	None
F4	15	RGB(255,204,153)			1416	RGB(244,165,230)	UNKNOWN	SYBR	None
F5	15	RGB(255,204,153)			1416	RGB(244,165,230)	UNKNOWN	SYBR	None
F6	15	RGB(255,204,153)			1416	RGB(244,165,230)	UNKNOWN	SYBR	None
F7	20	RGB(253,138,88)			1416	RGB(244,165,230)	UNKNOWN	SYBR	None
F8	20	RGB(253,138,88)			1416	RGB(244,165,230)	UNKNOWN	SYBR	None
F9	20	RGB(253,138,88)			1416	RGB(244,165,230)	UNKNOWN	SYBR	None
F10	water	RGB(213,244,165)			1416	RGB(244,165,230)	NTC	SYBR	None
F11	water	RGB(213,244,165)			1416	RGB(244,165,230)	NTC	SYBR	None
F12	water	RGB(213,244,165)			1416	RGB(244,165,230)	NTC	SYBR	None
G1	jing	RGB(132,193,241)			actin	RGB(255,191,168)	UNKNOWN	SYBR	None
G2	jing	RGB(132,193,241)			actin	RGB(255,191,168)	UNKNOWN	SYBR	None
G3	jing	RGB(132,193,241)			actin	RGB(255,191,168)	UNKNOWN	SYBR	None
G4	ye	RGB(168,255,222)			actin	RGB(255,191,168)	UNKNOWN	SYBR	None
G5	ye	RGB(168,255,222)			actin	RGB(255,191,168)	UNKNOWN	SYBR	None
G6	ye	RGB(168,255,222)			actin	RGB(255,191,168)	UNKNOWN	SYBR	None
G7	hua	RGB(223,221,142)			actin	RGB(255,191,168)	UNKNOWN	SYBR	None
G8	hua	RGB(223,221,142)			actin	RGB(255,191,168)	UNKNOWN	SYBR	None
G9	hua	RGB(223,221,142)			actin	RGB(255,191,168)	UNKNOWN	SYBR	None
G10	5	RGB(247,255,168)			actin	RGB(255,191,168)	UNKNOWN	SYBR	None
G11	5	RGB(247,255,168)			actin	RGB(255,191,168)	UNKNOWN	SYBR	None
G12	5	RGB(247,255,168)			actin	RGB(255,191,168)	UNKNOWN	SYBR	None
H1	10	RGB(180,255,0)			actin	RGB(255,191,168)	UNKNOWN	SYBR	None
H2	10	RGB(180,255,0)			actin	RGB(255,191,168)	UNKNOWN	SYBR	None
H3	10	RGB(180,255,0)			actin	RGB(255,191,168)	UNKNOWN	SYBR	None
H4	15	RGB(255,204,153)			actin	RGB(255,191,168)	UNKNOWN	SYBR	None
H5	15	RGB(255,204,153)			actin	RGB(255,191,168)	UNKNOWN	SYBR	None
H6	15	RGB(255,204,153)			actin	RGB(255,191,168)	UNKNOWN	SYBR	None
H7	20	RGB(253,138,88)			actin	RGB(255,191,168)	UNKNOWN	SYBR	None
H8	20	RGB(253,138,88)			actin	RGB(255,191,168)	UNKNOWN	SYBR	None
H9	20	RGB(253,138,88)			actin	RGB(255,191,168)	UNKNOWN	SYBR	None
H10	water	RGB(213,244,165)			actin	RGB(255,191,168)	NTC	SYBR	None
H11	water	RGB(213,244,165)			actin	RGB(255,191,168)	NTC	SYBR	None
H12	water	RGB(213,244,165)			actin	RGB(255,191,168)	NTC	SYBR	None

## Sheet: Results
Block Type	96fast
Chemistry	SYBR_GREEN
Experiment File Name	S:\LQW\ZHB\2014-4-4.eds
Experiment Run End Time	2012-05-24 01:58:16 AM CST
Instrument Type	sds7500fast
Passive Reference	ROX
Well	Sample Name	Target Name	Task	Reporter	Quencher	Cт	Cт Mean	Cт SD	Quantity	Quantity Mean	Quantity SD	Automatic Ct Threshold	Ct Threshold	Automatic Baseline	Baseline Start	Baseline End	Tm1	Tm2	Tm3	Comments	AMPNC	HIGHSD	OUTLIERRG	MTP
A1	jing	1230	UNKNOWN	SYBR	None	21.5312	21.1807	1.01411				TRUE	0.330263	TRUE	3	17	75.7703				N	Y	N	N
A2	jing	1230	UNKNOWN	SYBR	None	20.0378	21.1807	1.01411				TRUE	0.330263	TRUE	3	14	76.6568				N	Y	N	N
A3	jing	1230	UNKNOWN	SYBR	None	21.973	21.1807	1.01411				TRUE	0.330263	TRUE	3	16	76.4795	83.5714			N	Y	N	Y
A4	ye	1230	UNKNOWN	SYBR	None	22.2016	22.0632	1.31239				TRUE	0.330263	TRUE	3	17	76.4795	83.7486			N	Y	N	Y
A5	ye	1230	UNKNOWN	SYBR	None	20.6871	22.0632	1.31239				TRUE	0.330263	TRUE	3	15	74.5292	83.9259			N	Y	N	Y
A6	ye	1230	UNKNOWN	SYBR	None	23.3009	22.0632	1.31239				TRUE	0.330263	TRUE	3	18	84.1032	76.8341			N	Y	N	Y
A7	hua	1230	UNKNOWN	SYBR	None	23.3045	23.4626	0.409249				TRUE	0.330263	TRUE	3	18	84.1032	76.6568			N	N	N	Y
A8	hua	1230	UNKNOWN	SYBR	None	23.1561	23.4626	0.409249				TRUE	0.330263	TRUE	3	17	76.3022	83.9259			N	N	N	Y
A9	hua	1230	UNKNOWN	SYBR	None	23.9274	23.4626	0.409249				TRUE	0.330263	TRUE	3	18	83.9259	76.6568			N	N	N	Y
A10	5	1230	UNKNOWN	SYBR	None	19.9866	23.1707	2.7575				TRUE	0.330263	TRUE	3	14	76.6568				N	Y	Y	N
A11	5	1230	UNKNOWN	SYBR	None	24.7612	23.1707	2.7575				TRUE	0.330263	TRUE	3	19	75.7703	83.9259			N	Y	N	Y
A12	5	1230	UNKNOWN	SYBR	None	24.7641	23.1707	2.7575				TRUE	0.330263	TRUE	3	19	75.9476	83.5714			N	Y	N	Y
B1	10	1230	UNKNOWN	SYBR	None	21.921	23.3116	2.08352				TRUE	0.330263	TRUE	3	15	74.3519				N	Y	N	N
B2	10	1230	UNKNOWN	SYBR	None	25.7071	23.3116	2.08352				TRUE	0.330263	TRUE	3	20	76.3022	83.9259			N	Y	N	Y
B3	10	1230	UNKNOWN	SYBR	None	22.3067	23.3116	2.08352				TRUE	0.330263	TRUE	3	16	74.8838				N	Y	N	N
B4	15	1230	UNKNOWN	SYBR	None	21.0924	23.0895	1.75913				TRUE	0.330263	TRUE	3	15	76.6568				N	Y	N	N
B5	15	1230	UNKNOWN	SYBR	None	24.4095	23.0895	1.75913				TRUE	0.330263	TRUE	3	18	76.8341				N	Y	N	N
B6	15	1230	UNKNOWN	SYBR	None	23.7665	23.0895	1.75913				TRUE	0.330263	TRUE	3	18	76.4795				N	Y	N	N
B7	20	1230	UNKNOWN	SYBR	None	22.2402	22.7638	0.463872				TRUE	0.330263	TRUE	3	16	77.1886				N	N	N	N
B8	20	1230	UNKNOWN	SYBR	None	23.1233	22.7638	0.463872				TRUE	0.330263	TRUE	3	17	76.6568				N	N	N	N
B9	20	1230	UNKNOWN	SYBR	None	22.9279	22.7638	0.463872				TRUE	0.330263	TRUE	3	17	76.8341				N	N	N	N
B10	water	1230	NTC	SYBR	None	24.6296	23.7653	1.14868				TRUE	0.330263	TRUE	3	19	76.4795				Y	Y	N	N
B11	water	1230	NTC	SYBR	None	22.4619	23.7653	1.14868				TRUE	0.330263	TRUE	3	17	77.0114				Y	Y	N	N
B12	water	1230	NTC	SYBR	None	24.2046	23.7653	1.14868				TRUE	0.330263	TRUE	3	19	76.1249				Y	Y	N	N
C1	jing	1095	UNKNOWN	SYBR	None	25.5317	24.804	0.794857				TRUE	0.532754	TRUE	3	19	75.7703				N	Y	N	N
C2	jing	1095	UNKNOWN	SYBR	None	23.9557	24.804	0.794857				TRUE	0.532754	TRUE	3	17	76.3022				N	Y	N	N
C3	jing	1095	UNKNOWN	SYBR	None	24.9245	24.804	0.794857				TRUE	0.532754	TRUE	3	18	76.1249				N	Y	N	N
C4	ye	1095	UNKNOWN	SYBR	None	23.6746	24.5084	1.17147				TRUE	0.532754	TRUE	3	17	76.4795				N	Y	N	N
C5	ye	1095	UNKNOWN	SYBR	None	25.8478	24.5084	1.17147				TRUE	0.532754	TRUE	3	20	76.3022	85.5216			N	Y	N	Y
C6	ye	1095	UNKNOWN	SYBR	None	24.0029	24.5084	1.17147				TRUE	0.532754	TRUE	3	17	76.4795				N	Y	N	N
C7	hua	1095	UNKNOWN	SYBR	None	22.2598	24.0557	1.78421				TRUE	0.532754	TRUE	3	15	77.0114				N	Y	N	N
C8	hua	1095	UNKNOWN	SYBR	None	25.828	24.0557	1.78421				TRUE	0.532754	TRUE	3	19	76.4795	85.3443			N	Y	N	Y
C9	hua	1095	UNKNOWN	SYBR	None	24.0792	24.0557	1.78421				TRUE	0.532754	TRUE	3	17	76.6568				N	Y	N	N
C10	5	1095	UNKNOWN	SYBR	None	25.9546	25.5744	1.57773				TRUE	0.532754	TRUE	3	19	76.4795				N	Y	N	N
C11	5	1095	UNKNOWN	SYBR	None	26.9273	25.5744	1.57773				TRUE	0.532754	TRUE	3	20	76.4795				N	Y	N	N
C12	5	1095	UNKNOWN	SYBR	None	23.8413	25.5744	1.57773				TRUE	0.532754	TRUE	3	17	76.3022				N	Y	N	N
D1	10	1095	UNKNOWN	SYBR	None	23.5256	24.8382	1.25723				TRUE	0.532754	TRUE	3	17	76.1249				N	Y	N	N
D2	10	1095	UNKNOWN	SYBR	None	24.9573	24.8382	1.25723				TRUE	0.532754	TRUE	3	18	76.3022				N	Y	N	N
D3	10	1095	UNKNOWN	SYBR	None	26.0316	24.8382	1.25723				TRUE	0.532754	TRUE	3	19	76.6568				N	Y	N	N
D4	15	1095	UNKNOWN	SYBR	None	23.6528	23.7896	0.570171				TRUE	0.532754	TRUE	3	17	76.1249				N	Y	N	N
D5	15	1095	UNKNOWN	SYBR	None	24.4157	23.7896	0.570171				TRUE	0.532754	TRUE	3	18	76.6568	86.2308			N	Y	N	Y
D6	15	1095	UNKNOWN	SYBR	None	23.3003	23.7896	0.570171				TRUE	0.532754	TRUE	3	17	76.8341				N	Y	N	N
D7	20	1095	UNKNOWN	SYBR	None	22.601	23.0315	1.75608				TRUE	0.532754	TRUE	3	16					N	Y	N	N
D8	20	1095	UNKNOWN	SYBR	None	24.9628	23.0315	1.75608				TRUE	0.532754	TRUE	3	18	76.6568	83.0395			N	Y	N	Y
D9	20	1095	UNKNOWN	SYBR	None	21.5308	23.0315	1.75608				TRUE	0.532754	TRUE	3	15	78.9616	64.6005	76.1249		N	Y	N	Y
D10	water	1095	NTC	SYBR	None	23.9709	24.9513	0.887954				TRUE	0.532754	TRUE	3	17	77.1886				Y	Y	N	N
D11	water	1095	NTC	SYBR	None	25.7014	24.9513	0.887954				TRUE	0.532754	TRUE	3	18	76.6568				Y	Y	N	N
D12	water	1095	NTC	SYBR	None	25.1817	24.9513	0.887954				TRUE	0.532754	TRUE	3	18	76.4795				Y	Y	N	N
E1	jing	1416	UNKNOWN	SYBR	None	27.925	27.7785	0.229921				TRUE	0.420138	TRUE	3	21	85.167				N	N	N	N
E2	jing	1416	UNKNOWN	SYBR	None	27.897	27.7785	0.229921				TRUE	0.420138	TRUE	3	21	85.167	76.4795			N	N	N	Y
E3	jing	1416	UNKNOWN	SYBR	None	27.5135	27.7785	0.229921				TRUE	0.420138	TRUE	3	22	85.5216				N	N	N	N
E4	ye	1416	UNKNOWN	SYBR	None	26.1731	25.5054	0.621222				TRUE	0.420138	TRUE	3	20	77.5432				N	Y	N	N
E5	ye	1416	UNKNOWN	SYBR	None	24.9444	25.5054	0.621222				TRUE	0.420138	TRUE	3	19	85.6989	77.0114			N	Y	N	Y
E6	ye	1416	UNKNOWN	SYBR	None	25.3986	25.5054	0.621222				TRUE	0.420138	TRUE	3	20	85.6989	78.2524			N	Y	N	Y
E7	hua	1416	UNKNOWN	SYBR	None	27.7016	26.8533	0.865896				TRUE	0.420138	TRUE	3	22	86.2308	77.1886			N	Y	N	Y
E8	hua	1416	UNKNOWN	SYBR	None	25.9708	26.8533	0.865896				TRUE	0.420138	TRUE	3	20	77.5432	85.5216			N	Y	N	Y
E9	hua	1416	UNKNOWN	SYBR	None	26.8875	26.8533	0.865896				TRUE	0.420138	TRUE	3	21	77.3659	85.5216			N	Y	N	Y
E10	5	1416	UNKNOWN	SYBR	None	25.6828	27.7428	1.79049				TRUE	0.420138	TRUE	3	19	77.3659				N	Y	N	N
E11	5	1416	UNKNOWN	SYBR	None	28.6211	27.7428	1.79049				TRUE	0.420138	TRUE	3	22	77.0114				N	Y	N	N
E12	5	1416	UNKNOWN	SYBR	None	28.9246	27.7428	1.79049				TRUE	0.420138	TRUE	3	23	76.4795				N	Y	N	N
F1	10	1416	UNKNOWN	SYBR	None	29.7814	28.771	1.83697				TRUE	0.420138	TRUE	3	24	76.3022	84.6351			N	Y	N	Y
F2	10	1416	UNKNOWN	SYBR	None	29.8809	28.771	1.83697				TRUE	0.420138	TRUE	3	24	76.6568	85.3443			N	Y	N	Y
F3	10	1416	UNKNOWN	SYBR	None	26.6506	28.771	1.83697				TRUE	0.420138	TRUE	3	20	76.8341				N	Y	N	N
F4	15	1416	UNKNOWN	SYBR	None	25.1199	25.2209	0.506361				TRUE	0.420138	TRUE	3	19	77.0114	85.6989			N	Y	N	Y
F5	15	1416	UNKNOWN	SYBR	None	24.7726	25.2209	0.506361				TRUE	0.420138	TRUE	3	19	77.1886	85.8762			N	Y	N	Y
F6	15	1416	UNKNOWN	SYBR	None	25.7701	25.2209	0.506361				TRUE	0.420138	TRUE	3	19	77.3659	85.8762			N	Y	N	Y
F7	20	1416	UNKNOWN	SYBR	None	27.6964	26.1192	1.57028				TRUE	0.420138	TRUE	3	21	85.6989	77.0114			N	Y	N	Y
F8	20	1416	UNKNOWN	SYBR	None	24.556	26.1192	1.57028				TRUE	0.420138	TRUE	3	18	77.3659				N	Y	N	N
F9	20	1416	UNKNOWN	SYBR	None	26.1052	26.1192	1.57028				TRUE	0.420138	TRUE	3	20	85.3443	77.0114			N	Y	N	Y
F10	water	1416	NTC	SYBR	None	27.8934	28.6024	0.852782				TRUE	0.420138	TRUE	3	22	77.1886				Y	Y	N	N
F11	water	1416	NTC	SYBR	None	28.3652	28.6024	0.852782				TRUE	0.420138	TRUE	3	23	77.0114				Y	Y	N	N
F12	water	1416	NTC	SYBR	None	29.5487	28.6024	0.852782				TRUE	0.420138	TRUE	3	23	76.6568				Y	Y	N	N
G1	jing	actin	UNKNOWN	SYBR	None	19.1164	18.9338	0.158913				TRUE	0.351318	TRUE	3	13	86.2308				N	N	N	N
G2	jing	actin	UNKNOWN	SYBR	None	18.8579	18.9338	0.158913				TRUE	0.351318	TRUE	3	13	86.5854				N	N	N	N
G3	jing	actin	UNKNOWN	SYBR	None	18.827	18.9338	0.158913				TRUE	0.351318	TRUE	3	13	86.7627				N	N	N	N
G4	ye	actin	UNKNOWN	SYBR	None	21.1337	20.7077	0.431151				TRUE	0.351318	TRUE	3	15	86.5854				N	N	N	N
G5	ye	actin	UNKNOWN	SYBR	None	20.2716	20.7077	0.431151				TRUE	0.351318	TRUE	3	14	86.7627				N	N	N	N
G6	ye	actin	UNKNOWN	SYBR	None	20.7177	20.7077	0.431151				TRUE	0.351318	TRUE	3	15	86.94				N	N	N	N
G7	hua	actin	UNKNOWN	SYBR	None	18.291	18.3054	0.136346				TRUE	0.351318	TRUE	3	12	86.94				N	N	N	N
G8	hua	actin	UNKNOWN	SYBR	None	18.1768	18.3054	0.136346				TRUE	0.351318	TRUE	3	12	86.94				N	N	N	N
G9	hua	actin	UNKNOWN	SYBR	None	18.4484	18.3054	0.136346				TRUE	0.351318	TRUE	3	13	86.7627				N	N	N	N
G10	5	actin	UNKNOWN	SYBR	None	19.1509	19.0534	0.172988				TRUE	0.351318	TRUE	3	14	86.4081				N	N	N	N
G11	5	actin	UNKNOWN	SYBR	None	18.8536	19.0534	0.172988				TRUE	0.351318	TRUE	3	13	86.4081				N	N	N	N
G12	5	actin	UNKNOWN	SYBR	None	19.1556	19.0534	0.172988				TRUE	0.351318	TRUE	3	14	86.0535				N	N	N	N
H1	10	actin	UNKNOWN	SYBR	None	18.3163	18.3411	0.0989712				TRUE	0.351318	TRUE	3	12	85.8762				N	N	N	N
H2	10	actin	UNKNOWN	SYBR	None	18.2569	18.3411	0.0989712				TRUE	0.351318	TRUE	3	13	85.8762				N	N	N	N
H3	10	actin	UNKNOWN	SYBR	None	18.4501	18.3411	0.0989712				TRUE	0.351318	TRUE	3	13	86.0535				N	N	N	N
H4	15	actin	UNKNOWN	SYBR	None	19.424	19.2517	0.432421				TRUE	0.351318	TRUE	3	13	86.2308				N	N	N	N
H5	15	actin	UNKNOWN	SYBR	None	18.7597	19.2517	0.432421				TRUE	0.351318	TRUE	3	13	86.4081				N	N	N	N
H6	15	actin	UNKNOWN	SYBR	None	19.5714	19.2517	0.432421				TRUE	0.351318	TRUE	3	14	86.4081				N	N	N	N
H7	20	actin	UNKNOWN	SYBR	None	19.5844	19.6283	0.0380165				TRUE	0.351318	TRUE	3	13	86.4081				N	N	N	N
H8	20	actin	UNKNOWN	SYBR	None	19.6498	19.6283	0.0380165				TRUE	0.351318	TRUE	3	13	86.4081				N	N	N	N
H9	20	actin	UNKNOWN	SYBR	None	19.6507	19.6283	0.0380165				TRUE	0.351318	TRUE	3	14	86.4081				N	N	N	N
H10	water	actin	NTC	SYBR	None	20.9123	21.9935	0.936868				TRUE	0.351318	TRUE	3	15	86.5854				Y	Y	N	N
H11	water	actin	NTC	SYBR	None	22.502	21.9935	0.936868				TRUE	0.351318	TRUE	3	17	86.4081				Y	Y	N	N
H12	water	actin	NTC	SYBR	None	22.5661	21.9935	0.936868				TRUE	0.351318	TRUE	3	17	86.2308				Y	Y	N	N

## Sheet: Raw Data
Block Type	96fast
Chemistry	SYBR_GREEN
Experiment File Name	S:\LQW\ZHB\2014-4-4.eds
Experiment Run End Time	2012-05-24 01:58:16 AM CST
Instrument Type	sds7500fast
Passive Reference	ROX
Well	Cycle	1	2	3	4	5
A1	1	151444	24196.4	62571.9	294176	1563.43
A2	1	131842	21531.3	64512.7	274251	911.102
A3	1	126477	19716.6	65621.2	260899	848.006
A4	1	128066	21601.3	75423.7	287976	530.556
A5	1	120958	19345.2	70401.3	260604	477.511
A6	1	105742	16668.9	62860.5	226958	86.4061
A7	1	123642	17912.6	66141.2	236176	1010.69
A8	1	133689	19233.1	69182.1	255494	503.135
A9	1	133987	18705.1	64364.4	245364	248.354
A10	1	135654	19904.5	66465	267558	40.7137
A11	1	140841	19623.4	62350	269689	484.375
A12	1	140396	20236.3	52890.4	260254	931.055
B1	1	131058	20660.3	56660.5	248913	211.244
B2	1	153046	20859	64570.3	257401	74.6074
B3	1	137779	21965.3	76164.1	284348	210.197
B4	1	142213	21407.9	75598.3	268499	803.357
B5	1	138954	19861.5	75785.9	259740	0
B6	1	115616	16888.4	63083.6	216332	0
B7	1	123598	17707.7	67774.7	234028	0
B8	1	136506	19426	74602.2	263950	0
B9	1	122416	17862.6	65252.2	239032	506.441
B10	1	120698	18300.6	60474.3	230496	316.513
B11	1	140398	19105.2	61451.4	254029	0
B12	1	119897	17507.6	54023.1	241974	0
C1	1	58916.2	13925.9	51371.1	227195	447.65
C2	1	118715	20358.5	69593.7	276604	969.6
C3	1	102689	20047.7	78082.5	289348	792.971
C4	1	115748	20482	80030.5	276655	607.22
C5	1	103507	17837.4	69579.8	235807	88.7875
C6	1	99015.2	16757.6	67005.2	222888	0
C7	1	97658	16444	67986.6	229074	0
C8	1	111122	18629	75008	254715	0
C9	1	101201	16233.4	63304.6	220806	313.313
C10	1	116846	19556.1	74279.8	277900	700.302
C11	1	117523	18512	67216.1	268782	586.296
C12	1	132396	20691.8	66848.7	298866	1472.76
D1	1	102783	17704.9	57088.2	242347	1518.47
D2	1	95064	15870.3	56697.7	221670	0
D3	1	117652	19265	66006.1	233794	1023.73
D4	1	110442	18091.4	68302	233451	75.1155
D5	1	98286.9	15867.6	64729.1	214754	0
D6	1	98429	15477.7	63580.6	208620	0
D7	1	85399.1	14211.9	60076.3	197703	0
D8	1	110472	18714.5	74657.9	252672	0
D9	1	102375	16878.4	66773	232141	0
D10	1	98954.4	16222.6	63722.9	235357	0
D11	1	96751.1	15513.4	60640.8	248652	101.158
D12	1	138230	21610.2	76012	334531	212.187
E1	1	145776	28404.9	74704.3	290338	1099.8
E2	1	152699	25661.8	70664.7	271473	814.045
E3	1	130911	23259.8	72992.5	264216	1016.71
E4	1	131084	21629.4	73386.8	253008	234.599
E5	1	135359	21828.9	75243.4	248752	0
E6	1	146399	23723.4	83244.5	270171	0
E7	1	155673	25275.3	88985.3	284179	0
E8	1	136159	23320.5	80210.8	264579	0
E9	1	140263	24195	79586	279528	256.251
E10	1	121961	20339.7	65443.8	243254	139.838
E11	1	136424	21376.8	63660.2	251116	98.7772
E12	1	120103	12915	51887.6	283293	0
F1	1	139840	24352.9	67881.8	292654	0
F2	1	141050	24426.1	71311.6	281206	679.25
F3	1	151780	25714.6	75985.2	276530	646.852
F4	1	133142	23438.5	73458.8	247772	1785.81
F5	1	145299	22445.8	75706.7	252889	0
F6	1	151125	25369.2	86240.7	288906	469.175
F7	1	147306	24220.5	84295.4	283120	0
F8	1	158879	26119	88279.7	299767	1471.98
F9	1	142848	23545.9	79525.7	280734	0
F10	1	129045	21132.2	68714.8	259256	0
F11	1	114669	18573.9	54350.8	217095	0
F12	1	123624	21338.5	60940.1	274141	0
G1	1	114926	22331.2	65026	296124	568.023
G2	1	141698	23703	67634	277311	1404.59
G3	1	128165	21903.2	68784.8	265669	111.752
G4	1	132799	23008.3	76098.9	276501	109.78
G5	1	140855	23249.1	76417.6	268296	1352.44
G6	1	145853	24603.9	82870.6	285514	585.002
G7	1	153284	25930.7	85652.6	296938	393.887
G8	1	162386	26464.2	86112.8	302479	0
G9	1	148599	23408.9	76215	279074	0
G10	1	143066	22238	72293	280656	0
G11	1	147487	23782.3	69505.6	294306	0
G12	1	128982	20188.4	53067.4	241733	1287.17
H1	1	131255	22161.2	56698.1	265408	1473.81
H2	1	128155	22149.8	64066.4	277913	352.956
H3	1	120929	21466.7	68588.2	277479	0
H4	1	138567	22576.5	73646.9	282374	413.381
H5	1	137411	22122.4	71717.9	264443	0
H6	1	157110	25510.3	83720.7	307685	887.659
H7	1	149204	22864.3	69149.9	269104	0
H8	1	156715	25435.8	79400.4	295464	805.485
H9	1	145474	23514.3	75479	295469	0
H10	1	155220	26819.7	74865.6	303050	894.72
H11	1	155043	25494.3	73588.7	331300	710.574
H12	1	195663	32388.5	70959.6	315057	6145.3
A1	2	152517	23806.2	61606.5	290167	971.377
A2	2	133909	21667.1	63540.3	270800	983.211
A3	2	129342	19910.6	65315.9	259049	652.925
A4	2	129785	21335.8	73986.9	283818	143.652
A5	2	123094	19287.8	69903.1	257797	739.744
A6	2	107039	16688.4	62086	224062	222.792
A7	2	124585	17703	65116.7	231995	711.623
A8	2	136110	19442	68847.5	253753	668.801
A9	2	135243	19142.1	64719.6	246529	389.257
A10	2	139020	20508.9	65651.4	262240	379.332
A11	2	142939	20538.8	61805.3	268600	0
A12	2	144865	20308	53192.8	261290	943.06
B1	2	133062	20550.7	56492.8	247181	481.512
B2	2	158520	21626.7	64980.5	258592	262.292
B3	2	141749	21763.3	74518.2	278174	479.707
B4	2	145339	21884.4	75652.6	266853	200.839
B5	2	141649	20244.9	75949.3	259608	0
B6	2	118571	16947.6	63711.1	217822	0
B7	2	126111	17563.9	67102.5	231312	0
B8	2	139153	19933.5	74434.2	262561	0
B9	2	123778	18016.5	64706.5	236794	698.068
B10	2	123151	18606.9	60523.7	229058	0
B11	2	143865	18805.4	62165	257809	601.102
B12	2	120471	17300.8	53023.7	239063	0
C1	2	59914	13743.1	50842.7	224221	477.71
C2	2	120439	20617.6	69400.7	275603	740.807
C3	2	104410	20232.1	77336	284808	430.857
C4	2	118125	20226.2	79494.8	273186	328.254
C5	2	104859	17957.3	69157.1	232746	511.229
C6	2	101319	16428.2	65153.5	215499	0
C7	2	98704.6	16489.5	66600.5	223839	0
C8	2	111413	18936.6	74708.5	253228	0
C9	2	103642	16630	64280.2	223118	390.506
C10	2	119936	19886.9	73840.6	273841	345.288
C11	2	119655	18676.3	66495.5	264173	697.127
C12	2	132606	20458.1	66587.3	296341	1253.45
D1	2	104396	17709	56606.4	239824	1387.16
D2	2	98460.6	16262	56981.7	222505	0
D3	2	120608	19799.3	66143.4	233978	807.575
D4	2	111760	18116.4	68319.6	233100	0
D5	2	101002	16432.6	65222.8	216387	0
D6	2	101360	15854.3	63509.4	207498	0
D7	2	86495.9	14268.4	59582.6	195617	0
D8	2	111601	18650.5	74572.7	251418	0
D9	2	103182	16411.3	65093.4	227313	0
D10	2	99617	16259.4	62104.5	228278	0
D11	2	97724.9	15501.2	60955	249254	0
D12	2	138993	22254.4	75855.9	332979	0
E1	2	146973	28192.3	74148.3	286965	927.899
E2	2	155865	25518.6	70036.9	267890	883.393
E3	2	135088	24157.3	72536.7	261688	589.634
E4	2	134201	21635.4	74468.8	255417	311.783
E5	2	138188	22160.7	75154	247326	670.138
E6	2	148095	23855.5	82773.8	268384	0
E7	2	158942	25230.8	89291.9	284332	0
E8	2	138170	23244.2	79792.8	263713	163.363
E9	2	142325	24316.2	78997	277874	206.091
E10	2	125676	20275.5	64143.8	237261	0
E11	2	139675	22080.8	64089.3	252811	179.498
E12	2	121798	12798.8	51174.2	277627	0
F1	2	141610	24777.8	67764.1	291766	0
F2	2	144267	25031.7	71929.6	281959	1001.36
F3	2	154152	26057.2	75280	273089	395.676
F4	2	135732	24087.2	73241.1	247958	1777
F5	2	148294	23101.3	76574.5	254888	345.006
F6	2	153413	25655.5	85765.2	287212	286.971
F7	2	148420	24401.6	83982.5	282153	429.831
F8	2	160119	26553.1	87365.4	295060	0
F9	2	145232	24430.4	78192.6	277405	0
F10	2	130507	21300.3	67431.3	254039	0
F11	2	117208	18837.3	54941.2	218711	0
F12	2	124933	21630.5	60711.9	273092	0
G1	2	118828	23045.3	63950.7	288910	0
G2	2	144981	24129.9	66734.7	272348	1204.24
G3	2	132302	22587	68092.7	261651	0
G4	2	135962	22907.9	74983.6	273060	645.291
G5	2	143731	23456.4	75614.6	263641	1013.42
G6	2	149890	24651.2	82943.9	285173	426.202
G7	2	157993	26201.6	84429.8	292568	0
G8	2	167062	26853.3	85760.6	301894	126.498
G9	2	150423	23824.8	75647.7	276870	0
G10	2	144789	23005.3	71791.3	278222	0
G11	2	150290	24071.4	69607.1	291953	0
G12	2	128961	19620.4	53100.5	242581	904.857
H1	2	132915	22146.9	57130.4	264871	1507.85
H2	2	130312	22577.9	64305.3	278090	911.431
H3	2	122651	21362	68475.3	277819	0
H4	2	141022	22899.7	73606.7	282588	834.957
H5	2	138842	22260.4	71362.8	263369	0
H6	2	160389	25774.6	84122.5	308930	1013.39
H7	2	152785	23467.9	69430.6	270176	0
H8	2	160762	26097	79663.7	296093	666.577
H9	2	148235	23857.6	75159.5	294757	0
H10	2	157281	27789.5	75085.2	305077	1033.92
H11	2	158323	25777.1	72803.3	325798	467.667
H12	2	195815	32123.8	70372.8	313163	6489.71
A1	3	154273	24417.3	60791.6	285051	955.014
A2	3	136355	21710.5	62727.6	266468	1110.26
A3	3	131574	20098.8	65134.9	256865	282.669
A4	3	132624	21454.9	72173	274307	364.877
A5	3	124217	19646.9	69755.8	255606	1755.01
A6	3	107209	16620.8	61049.4	218646	130.456
A7	3	126289	17848.8	64410	229104	529.368
A8	3	135815	19100	68154.1	250238	842.356
A9	3	135746	18899	64612.7	244789	616.323
A10	3	141419	20339.9	64841.7	259713	453.808
A11	3	144496	20674.8	61094.1	266470	49.9475
A12	3	144245	20356.8	52776.5	258063	530.888
B1	3	134463	20550.7	55497	243208	188.463
B2	3	158218	21659	64763.3	256118	178.358
B3	3	142539	21832	73251.6	273695	0
B4	3	146257	21764.5	74568.8	263581	298.216
B5	3	142736	20399.5	75549.6	258758	60.6561
B6	3	119093	16992.4	63338.1	215742	0
B7	3	125841	17686	66534.5	228549	0
B8	3	139927	19290.5	73836.4	259943	0
B9	3	125785	17821.9	64544.9	234644	476.5
B10	3	123320	18291.5	60213.1	227965	0
B11	3	143188	19035.4	61680.2	255046	0
B12	3	121035	17354	52981.8	237326	0
C1	3	60408.5	13485.3	49681.2	218535	256.729
C2	3	122323	21034.1	69852.9	275527	980.687
C3	3	105627	20063	76182.4	280744	438.603
C4	3	117784	20186.8	78585.5	270070	319.382
C5	3	106102	17833.7	68685.8	230058	696.281
C6	3	100363	16172.5	63105.1	207978	0
C7	3	100110	16383.7	65265	219082	0
C8	3	112203	18823	73650.5	249514	86.0028
C9	3	103828	16519.4	64063.5	222147	679.298
C10	3	119922	19211.2	73205.8	271005	594.284
C11	3	120502	18425	64777.8	256766	328.06
C12	3	135112	20502.7	65958	293204	1184.33
D1	3	104428	17854.2	55572.7	234013	1174.93
D2	3	98088.3	16299.2	56419.8	221443	0
D3	3	121091	19716	65784.1	232520	913.35
D4	3	112774	18366.3	68183.3	232119	125.843
D5	3	100841	16400.8	64938.7	214956	0
D6	3	100895	15903.1	63332.9	206746	0
D7	3	86318.6	14001.8	59205.7	193530	0
D8	3	111323	18622.4	73696.4	248418	0
D9	3	104013	16792.6	65264.2	226239	0
D10	3	100054	16220.8	61754.6	227437	0
D11	3	98027.4	15418.1	60755.9	247860	0
D12	3	138804	22123	74290.1	324960	696.435
E1	3	148297	28279.8	72741.6	280180	1114.05
E2	3	156524	25440.4	67975.6	259781	913.266
E3	3	137382	24012.7	71010.1	254590	735.84
E4	3	134141	21818.6	73585.5	252714	0
E5	3	138869	22114.4	75153	245098	2169.36
E6	3	149027	23725.3	81264	261756	86.457
E7	3	158798	25463.2	88355.4	280665	136.741
E8	3	137551	22773.1	78340	257836	0
E9	3	142717	24261	78449.2	275061	0
E10	3	125284	20580.9	63819.8	236696	62.9271
E11	3	140046	22051.9	63951.5	251729	486.451
E12	3	120858	12857.9	50333.9	274577	0
F1	3	141909	24570	67465.1	290402	0
F2	3	144143	24675.8	71027	279520	841.999
F3	3	155783	25846.5	74014.1	268503	644.912
F4	3	136726	23813.9	72804.6	247019	1289.7
F5	3	148903	23237.9	75989.5	254381	613.556
F6	3	152749	25435.6	85014	285090	497.417
F7	3	149254	24314.4	83379	278803	417.246
F8	3	161725	26499.5	86797.9	292993	93.4763
F9	3	146828	24045.9	78031.7	276326	0
F10	3	130228	21307.9	67357.3	252608	0
F11	3	117117	18863.7	54009.5	217497	0
F12	3	123877	21571.4	59984.2	271435	0
G1	3	118765	22703.5	63182.1	284952	0
G2	3	146153	23810.8	65473	267512	1238.89
G3	3	133067	22588.9	66664.5	256177	0
G4	3	135782	22810.2	73881	267613	309.704
G5	3	144703	23566.8	74662.1	261408	766.863
G6	3	148677	24779.6	82183.6	284080	679.003
G7	3	158313	26148.6	83618	289057	406.53
G8	3	166963	26922.1	85750.9	300964	0
G9	3	151885	23872.1	75621.8	275959	0
G10	3	144743	22679.2	71353.9	277410	0
G11	3	150103	23713.4	69079.9	290232	0
G12	3	128440	20140.7	53043.5	240647	533.125
H1	3	132066	21566.4	56331.9	262815	1190.11
H2	3	129685	22333.5	63362.2	272590	679.106
H3	3	122983	21781.9	68319	277305	0
H4	3	141583	23131.9	73272.9	280087	577.277
H5	3	138592	22020.1	70898.1	260960	0
H6	3	160716	25732.3	83476.7	306082	887.659
H7	3	151761	23452.3	68912.8	267455	0
H8	3	161171	26133.5	79449.1	293369	593.515
H9	3	147458	23584.7	74724.9	292177	0
H10	3	159179	27593.2	75342.4	303910	826.241
H11	3	158794	25360	72339.6	323262	11.1682
H12	3	194836	31598.1	68520.2	310189	4451.97
A1	4	155851	24231.3	60153.9	280968	1111.21
A2	4	137688	21408.3	61688.6	261827	1233.88
A3	4	133645	20475.1	64284.4	255362	734.54
A4	4	134252	21197	71094.4	269662	136.949
A5	4	125932	19451.5	69001.5	253172	1815.25
A6	4	105960	16040.4	59696.2	213921	0
A7	4	124230	17428.1	63408.5	223275	131.721
A8	4	136254	19150.6	67465.9	246456	836.22
A9	4	135132	18844	64520.7	243108	618.351
A10	4	140903	20505	64084.5	255442	406.144
A11	4	143523	20389.1	61050.2	264939	318.27
A12	4	144538	20146.9	52889.1	257900	1100.46
B1	4	134685	20347.9	54411.6	239427	473.228
B2	4	156764	21784.5	64902	255101	0
B3	4	143751	21546	72249.9	267982	64.516
B4	4	147735	21947.2	73849.3	259344	279.958
B5	4	142337	20374.7	75781.8	257553	0
B6	4	118295	16573.8	63290.7	215000	0
B7	4	125644	17470.8	65860.7	226163	0
B8	4	140338	19420.5	73018.9	255722	0
B9	4	125666	17918.8	63564.2	231257	609.954
B10	4	123768	18596	60015.4	227877	341.226
B11	4	142224	19024.5	61276	253570	0
B12	4	120672	17248.8	52683.7	237549	0
C1	4	60607.6	13658.6	49535.8	216792	369.657
C2	4	122695	20809.2	69851.9	273674	3560.91
C3	4	105435	19854.6	75334	276152	112.313
C4	4	117614	20111.8	77981.6	266149	634.821
C5	4	105564	17907.3	67785.3	226519	2410.35
C6	4	99041.1	16204.9	62906.8	206739	0
C7	4	100696	16161.2	64339.3	214967	0
C8	4	111718	18345.4	72617.3	245062	0
C9	4	103390	16653.7	63723.5	222117	227.946
C10	4	121006	19650	72275.2	266521	510.637
C11	4	120534	18348.8	64514.4	254184	398.992
C12	4	133286	20426.6	65080.2	288950	1079.32
D1	4	105413	17687.9	54484.5	228822	1172.64
D2	4	98990.8	16494.6	56487.4	221063	0
D3	4	121522	19776.4	65588.8	231935	627.296
D4	4	112807	18170.2	67740.1	231632	0
D5	4	101505	16343.6	65004.8	214291	0
D6	4	101313	15773.5	63066.3	205529	0
D7	4	86382.2	14106.8	59103.1	193284	0
D8	4	111893	18214.2	72928.1	245011	0
D9	4	103318	16398	64946.9	226182	0
D10	4	100038	16007.6	61048.4	226464	18.3193
D11	4	98128.9	14921.7	60612.5	247709	0
D12	4	138223	21186.4	73064.5	318104	102.942
E1	4	147445	27805.6	71076.6	273295	787.337
E2	4	156310	25458	67662.2	256700	920.735
E3	4	136648	24001.1	69742.9	250320	1005.17
E4	4	132949	21317.5	73589.6	252204	505.759
E5	4	139152	22314	74056.4	242894	2922.9
E6	4	147574	23425.1	79677.8	257826	213.658
E7	4	158916	25177.6	87065.2	275475	0
E8	4	137448	23052	78214.9	257094	1.06773
E9	4	142751	24342.2	77747.6	271691	127.58
E10	4	125787	20653	64028.3	237047	278.677
E11	4	139593	21961.9	63901.4	251855	0
E12	4	120432	12797.8	50035	272773	0
F1	4	140503	24632.7	67210.2	288510	0
F2	4	144046	24598.8	70893.1	278215	536.845
F3	4	154729	25488.2	72235.7	260847	507.202
F4	4	135456	23458.3	72620	246739	1487.36
F5	4	147762	23036.8	76206.2	254278	452.044
F6	4	152702	25484.1	85346.1	285046	485.574
F7	4	147893	23702.6	81855.2	272776	306.884
F8	4	161067	26305	86765.5	292036	0
F9	4	146958	23966	77924.5	276036	0
F10	4	129463	20947.8	67237.5	252821	0
F11	4	116491	18783.6	53959.9	216167	0
F12	4	123342	21369.3	60191.5	271839	0
G1	4	119610	22656.3	62888.4	283999	0
G2	4	146351	24024.3	65325.4	265875	1354.77
G3	4	132473	22247.5	65708.2	251895	331.466
G4	4	135247	22406.6	72922.5	263140	544.437
G5	4	143535	23380.6	74426.4	260544	803.122
G6	4	148726	24643	82371.8	283814	972.873
G7	4	157900	26199.7	83360.8	288298	196.457
G8	4	166887	26953.3	85847.1	300749	0
G9	4	151754	24007.1	75742.1	275681	0
G10	4	144917	22713.6	71620.8	277067	0
G11	4	149266	23952	69184.1	289269	0
G12	4	129117	19764.9	52687.7	239581	478.886
H1	4	133145	21794.8	56491.3	262527	1168.84
H2	4	131493	22303.7	63451.2	273887	975.097
H3	4	123583	21688.6	68194	276582	0
H4	4	140333	22518.7	73004.6	279186	999.763
H5	4	138689	22283.6	70623.5	260923	0
H6	4	160034	25460.3	83154.4	306213	881.987
H7	4	152205	23588.1	68740.5	266756	0
H8	4	161148	26324.4	79004.1	292773	513.237
H9	4	147451	23564.4	74440.3	291552	0
H10	4	160046	28237.4	75171.7	304270	890.23
H11	4	156945	25591.4	72283	323194	381.113
H12	4	193946	31573.2	69130.1	311342	5373.76
A1	5	155555	23786.3	59132.4	277359	492.382
A2	5	137643	21780.7	61272.8	257431	1099.96
A3	5	134718	20274.1	63693.3	252061	899.762
A4	5	134632	21187.6	70271.6	265154	0
A5	5	125878	19466.1	68156	249338	2441.6
A6	5	104942	16224.6	59475.3	212946	220.251
A7	5	123532	17318.2	63181.2	222644	140.005
A8	5	136749	19108.5	66504.3	242572	1197.35
A9	5	134027	18865.2	64387.1	243465	541.31
A10	5	141756	20340.9	63256.3	250662	338.618
A11	5	144139	20555.9	60956.8	264211	0
A12	5	144428	19893.7	52896.7	256656	748.312
B1	5	134989	20650.6	53794.4	235642	299.262
B2	5	156491	21802.5	64468.6	255747	0
B3	5	144529	21386.1	71303.8	264972	117.586
B4	5	147614	21819.5	72599.5	255146	615.704
B5	5	142599	20519.4	75562.9	257682	0
B6	5	118970	16978	62981	214877	0
B7	5	126905	17611.3	65339.1	223922	0
B8	5	139564	19336.6	72477.4	253039	0
B9	5	126130	17682.7	62757.8	228806	633.052
B10	5	122851	18356.2	59813	227749	209.108
B11	5	143015	18689.8	61160.5	253634	0
B12	5	120094	17266.6	52758.5	237783	0
C1	5	60542.1	14028.5	49414.9	215960	93.4297
C2	5	123604	20998.8	68903.3	270366	3732.25
C3	5	105805	19559.8	74242.5	272517	574.154
C4	5	119421	20098.3	76991.2	262404	302.624
C5	5	106350	17813.7	67905	226292	4151.52
C6	5	101052	16258	62770.2	207379	0
C7	5	101849	16321	63919.8	213183	0
C8	5	111849	18176.4	70729.8	238085	42.5183
C9	5	103509	16730.1	63817.8	221624	39.0506
C10	5	121557	19234.7	71141.4	262079	667.232
C11	5	119992	18439	63793.8	253499	426.699
C12	5	132953	19892.2	63357.8	281489	2141.36
D1	5	104555	17078	53133	222287	1408.54
D2	5	99751.9	15978.1	56578.2	221433	0
D3	5	122114	19815.8	65558.4	231459	917.949
D4	5	113886	18429.7	68004.9	232012	246.808
D5	5	101680	16617.1	64886.5	214081	0
D6	5	101333	15948.3	63124.9	205878	0
D7	5	86343.3	14068.8	59058.1	193517	0
D8	5	112212	18140.5	71738	242341	0
D9	5	103425	16639.2	64836.3	225636	0
D10	5	99397.3	15709.3	61468.9	226161	125.487
D11	5	97775.1	15236.8	60592.3	247144	0
D12	5	136780	20510.4	70855.7	308309	363.449
E1	5	146996	27759.8	71139.5	273759	994.381
E2	5	155277	25323.6	67227.1	257288	827.914
E3	5	136641	23806.4	69735.1	249427	511.721
E4	5	132934	21557	73754.3	251992	146.244
E5	5	137548	21750.8	72333.4	234619	3744.14
E6	5	146730	23277.5	79848.8	256835	88.4445
E7	5	158806	25287.3	86054.6	272911	0
E8	5	136682	23196.2	78048.1	257266	0
E9	5	141337	23654.8	76348.9	264872	0
E10	5	125308	20702.4	63861	236834	202.765
E11	5	140194	21925.4	63750	251869	236.853
E12	5	120688	12408	49973.9	272297	0
F1	5	141538	24477.1	67134.2	288864	0
F2	5	144612	24679.3	70974.8	278365	333.409
F3	5	152925	25355.3	71748.8	257947	524.658
F4	5	135326	23455.3	72574.8	246794	1456.05
F5	5	147970	23302.4	76274.2	253612	0
F6	5	152980	25406.9	85160.2	285028	553.9
F7	5	146350	23636.2	81123	271193	30.9788
F8	5	160003	25962.4	86441.4	292359	0
F9	5	146698	24273.8	77822.7	276191	0
F10	5	129425	21233.1	67332.2	252982	0
F11	5	116518	18715.1	53957.8	215531	0
F12	5	123767	21357.5	59985.3	271517	0
G1	5	119299	22923	62715	284181	0
G2	5	146170	24119.8	65322.2	266018	1324.45
G3	5	133386	22256.2	65646	251952	82.3931
G4	5	134432	22229.3	72664.5	263181	439.119
G5	5	143411	23219	74490.4	260091	806.748
G6	5	148345	24585.7	82417.2	283798	768.442
G7	5	158822	26481.2	83564.8	288039	289.823
G8	5	166024	26850.1	85546.7	301278	0
G9	5	152058	23961.8	75385.4	276254	0
G10	5	144207	23044	71301.3	276605	0
G11	5	150313	23624.5	69161.9	289700	0
G12	5	128315	19640	52841.7	240363	616.467
H1	5	131143	22131.1	56702.4	263322	1662.47
H2	5	130936	22537.4	63631.5	275193	746.123
H3	5	123485	21206.5	68008.5	276161	0
H4	5	139834	22604.9	72961.5	279537	860.452
H5	5	137734	22090.8	70940.4	260628	0
H6	5	158968	25477.6	83371.2	305963	221.206
H7	5	152298	23501.6	68644.3	267059	0
H8	5	161464	26318.9	79036.2	292848	662.067
H9	5	147912	23966.6	74456.7	291423	0
H10	5	161793	28160.1	75427.7	304464	680.302
H11	5	157380	25104.2	72698.4	322846	50.2567
H12	5	192334	31789.9	69347.6	309931	5594.93
A1	6	156178	24151.6	58447.5	272015	1346.24
A2	6	138876	21439.9	60296	252536	335.368
A3	6	134683	20147	63023.9	247993	817.151
A4	6	136324	20972.8	69295.6	261032	93.8528
A5	6	126442	19032.5	67183.3	245916	2220.12
A6	6	104813	16316.7	59513.9	212686	41.5088
A7	6	123128	17439.3	63006.6	222346	777.069
A8	6	136991	18856.6	65465.9	238833	1044.84
A9	6	133432	18870	64197.2	242839	876.842
A10	6	141412	19744.3	62325.1	247109	695.111
A11	6	144516	20520.5	60958	264299	123.126
A12	6	143123	20470.5	52617.1	257277	508.212
B1	6	135194	20523.6	53263.5	231626	652.371
B2	6	156774	21433	64672	256265	191.181
B3	6	145114	21384	70716.3	260695	0
B4	6	147192	21272.4	72034	251844	136.936
B5	6	141954	20361.9	75874.3	258181	0
B6	6	119693	16862.2	63131.9	215391	0
B7	6	124363	17025.5	63906.2	218217	0
B8	6	138838	19021.4	71372.7	249592	0
B9	6	122680	16978.4	61475.9	220956	649.306
B10	6	122657	18432.8	59984.6	227848	153.029
B11	6	141917	18843.5	61188.9	254109	0
B12	6	121007	17247.7	52706.4	237596	0
C1	6	61897.3	13780.2	49401.1	216026	498.833
C2	6	123886	20714.9	68232	265619	3765.51
C3	6	106089	19299.5	73658.4	267429	477.332
C4	6	118268	19686.8	75894	258332	525.403
C5	6	105686	17605.6	67407.5	225517	2762.69
C6	6	101145	16096.5	62738.5	207150	0
C7	6	100534	16063.3	62649.4	208631	0
C8	6	111669	18206	70513.6	237813	0
C9	6	103945	16455.4	63922.1	222671	178.906
C10	6	122405	19382.2	70008.6	257732	0
C11	6	120295	18166.3	64243.4	252980	576.321
C12	6	132451	19760.8	63433.4	280552	1799.75
D1	6	104651	17177.7	52959.1	222025	1352.04
D2	6	99369.2	16403.5	56737.5	222147	232.423
D3	6	122472	20109.5	65748.2	231855	836.088
D4	6	112641	18152.9	68010.8	231657	244.857
D5	6	102689	16504.4	64854.9	214488	0
D6	6	102230	15711.7	63289.7	205644	0
D7	6	86323.9	13748	59284.9	193258	0
D8	6	111293	18247.1	71283.5	238934	0
D9	6	103368	16517.1	65459.2	226592	0
D10	6	99180.1	15929.7	61458.9	226469	109.916
D11	6	97727.8	15265.1	60627.6	247368	0
D12	6	135982	20374.8	70751.9	308849	646.014
E1	6	147083	27880.7	71274	272452	913.653
E2	6	155447	25336.8	67357.4	256650	620.936
E3	6	136326	23544.2	69507.7	248752	1070.57
E4	6	132461	21156.5	73317.8	251416	137.103
E5	6	136964	21852.1	72080.9	233808	4692.93
E6	6	147479	23398.9	79913.2	257193	0
E7	6	156465	24181.6	84083.9	263970	281.201
E8	6	136539	22729.2	78217	256310	128.128
E9	6	141200	23190.4	75790.2	263585	92.6866
E10	6	125641	20498.8	63964.7	237461	156.818
E11	6	139901	21787.2	63653.9	251251	110.46
E12	6	121574	12629.5	50680.7	275447	0
F1	6	141350	24494.1	67124.4	289338	0
F2	6	144164	24162.4	70647.1	277717	647.605
F3	6	153235	25152.5	71650.5	257885	96.0095
F4	6	135287	23566.3	72650.1	246777	1715.35
F5	6	147599	22806.2	76450.1	254987	254.215
F6	6	153112	25248.1	85423.8	284762	645.913
F7	6	146175	23471.2	80846.1	270418	125.851
F8	6	160138	25866.8	86347.7	292261	105.295
F9	6	146882	24189.5	78015.3	276156	0
F10	6	129320	20948.8	67324.6	253241	0
F11	6	114427	18641.4	53859.5	215129	0
F12	6	122854	20792.4	60023.9	271171	0
G1	6	119600	23009.2	62989.3	284019	0
G2	6	145952	24187.2	65249.5	266095	1432.74
G3	6	132997	22167	65467	252119	0
G4	6	134403	22528.8	72792.1	262958	488.208
G5	6	143809	23451.8	74536.8	260270	680.75
G6	6	149288	24760.5	82508.1	283684	616.944
G7	6	159316	26080.1	83564.8	288585	0
G8	6	166948	26775.9	85996.1	301672	0
G9	6	151958	24009.1	75500.6	276769	0
G10	6	144028	22666.3	71457.9	277246	444.801
G11	6	149549	23946.7	69181.5	289691	0
G12	6	127133	19523.6	53502.8	239428	1100.64
H1	6	133771	21815.4	56656.5	262644	1956.1
H2	6	128645	21858.9	63479.4	275124	640.012
H3	6	123738	21815.1	68337.1	276566	0
H4	6	141221	22568.9	72941	279484	864.094
H5	6	138782	21932.8	70543	261022	0
H6	6	159515	25616	83465.1	305883	637.148
H7	6	151792	23077	68674.1	267064	0
H8	6	162538	26413	79268.3	293094	778.425
H9	6	147389	23569.3	74532.2	290995	0
H10	6	163214	28582.6	75128.5	303526	574.776
H11	6	156311	25611.4	72661.2	323194	388.094
H12	6	193140	31166.4	68896	310880	5311.3
A1	7	156444	23998.8	57554.4	268562	1204.92
A2	7	138057	21047.6	59265.9	247621	1206.41
A3	7	134985	20073.2	61691.9	243066	417.036
A4	7	135564	20851.8	68248.1	256452	103.43
A5	7	127109	19258.7	66551.8	242260	1838.29
A6	7	105095	16068.9	59604.7	212966	100.807
A7	7	122642	17489.5	63271.8	222376	599.785
A8	7	136423	18744.6	64461.2	234085	823.072
A9	7	133748	19025.3	64257.5	243758	374.052
A10	7	143430	20324.5	61743.8	243486	121.148
A11	7	143276	20786.8	61099.8	265048	241.607
A12	7	143723	20021	52685.4	257071	896.374
B1	7	137029	20254.6	52519.7	228667	387.281
B2	7	158297	21747.5	65368.8	258644	514.091
B3	7	141475	20641.8	68881.8	251588	254.942
B4	7	144090	20695.8	69674.2	242964	317.488
B5	7	142771	20514.5	75855.8	258546	0
B6	7	119781	16830	63188.9	215260	0
B7	7	123220	17017.2	63405.3	217383	0
B8	7	135623	18196.9	69800.6	242633	0
B9	7	121735	16845.6	60991.1	220565	693.79
B10	7	123197	18797.4	60293.4	227819	0
B11	7	141605	18699.6	61323.9	253465	0
B12	7	120402	17097.6	52606.7	237598	0
C1	7	62054.8	13513.8	49211.6	215888	125.115
C2	7	124086	20221.8	66782	259583	3898.56
C3	7	105964	19431.1	72311.4	263007	343.718
C4	7	118076	19434.9	74744.5	253134	579.619
C5	7	106804	17838.3	67510.3	226682	2401
C6	7	100031	16068	63065.3	206818	0
C7	7	99672	15612.1	62127.9	205621	0
C8	7	111620	18310.3	70829.3	237042	0
C9	7	104958	16591.4	64284.7	222311	313.313
C10	7	121877	18949.9	68064.6	249557	300.546
C11	7	120521	18498	64689.7	253372	282.619
C12	7	133350	19458.8	63673	280792	1462.13
D1	7	104681	17137.2	52878.3	222477	1477.25
D2	7	100002	16431.8	57095.9	221725	346.926
D3	7	122141	19943.9	66034.7	232173	971.297
D4	7	113503	18393.2	68014.7	231753	0
D5	7	102798	16086.5	64954.5	214940	0
D6	7	101853	15862.2	63015	205591	0
D7	7	86631.3	13921.8	59379.2	192953	0
D8	7	109721	17537.4	69620.1	233090	0
D9	7	103548	16441.8	65252.5	226276	0
D10	7	99397.3	15889.4	61496.9	225402	0
D11	7	97914.1	14993.6	60546.8	247422	0
D12	7	135435	20470.1	70532	308043	509.459
E1	7	147677	27725.4	71349.7	273209	1330.59
E2	7	154894	25107.7	67404.8	256637	470.503
E3	7	136959	23675.3	69339.6	248212	1056.15
E4	7	131949	21330.5	73604	251714	108.667
E5	7	136207	21851.1	72214.1	233485	5616.21
E6	7	146578	23153.1	79756.3	256914	0
E7	7	154987	24320.6	83526.9	263015	0
E8	7	135970	22827.4	78430.9	256829	143.076
E9	7	140004	23326.8	75677.6	263870	0
E10	7	125274	20595.7	64252.5	237429	82.904
E11	7	140667	21851.5	63814.7	251769	0
E12	7	121769	12761.4	50923.2	276146	28.5977
F1	7	141422	24392.2	67108.5	289960	0
F2	7	144633	24524.1	70794.5	278271	762.885
F3	7	152618	25319.9	71812.8	257842	605.151
F4	7	135993	23517.7	72753.4	246851	1226.09
F5	7	147603	22902	76522	254179	206.43
F6	7	152555	25215.8	85629.2	284689	258.73
F7	7	146394	23376.3	81004	270225	0
F8	7	159234	25991.8	86720.3	292600	20.4144
F9	7	147275	24246.8	78252.8	276507	0
F10	7	128852	20786.1	67518.4	253400	0
F11	7	115624	18690.9	53498.6	214954	0
F12	7	123342	21161.2	60176.1	272156	0
G1	7	119900	23139.7	63518.5	285028	0
G2	7	146289	24325.4	65456.7	265889	1154.42
G3	7	133670	22435.7	65742.7	251786	73.8697
G4	7	134374	22411.2	72738.3	262836	606.02
G5	7	143422	23418.9	74623.2	259347	607.327
G6	7	149039	24970.8	82340.3	283622	378.745
G7	7	158770	26305.7	83440.6	288285	212.991
G8	7	166544	26954.4	85830.9	301422	49.3129
G9	7	151076	23728.2	75724.2	277165	0
G10	7	145026	22569.4	71778.4	277421	217.601
G11	7	150723	23596.7	69276.5	290427	0
G12	7	126592	20137.9	52594.7	240133	628.373
H1	7	132642	21617.1	56263	262310	1261.04
H2	7	128995	22047.3	63307	274775	253.548
H3	7	123243	21465.7	68036.7	276519	0
H4	7	140842	22581.2	72850.3	279997	545.408
H5	7	138608	22182.2	70838.4	261552	0
H6	7	160107	25640	83456.4	306300	518.038
H7	7	151715	23201.5	68744.9	267139	0
H8	7	162391	26183.7	79253.6	293453	618.771
H9	7	147691	23649.3	74558.4	291392	0
H10	7	163763	29164.5	75321.9	304563	638.765
H11	7	156248	25370	72448.6	323299	679.862
H12	7	192041	31258.8	69342.7	311622	5524.02
A1	8	153052	23044.1	56050.2	259075	871.71
A2	8	136511	20601.5	58357.8	241961	811.521
A3	8	134921	19809.2	61795.7	239832	446.895
A4	8	136018	20627.6	67489.2	252691	35.4342
A5	8	126704	18727.4	65636.2	238613	1751.47
A6	8	105181	16063.2	59460.2	212883	0
A7	8	122367	17354	63133.4	222923	515.285
A8	8	134022	18162.6	63100.3	228399	1014.16
A9	8	134386	18564.3	64399	243167	726.816
A10	8	141620	19716.3	60727	240175	159.876
A11	8	143643	20584.5	61276.4	264737	241.607
A12	8	143587	20274.2	52484.3	257026	772.322
B1	8	133806	19807.6	51431.3	221760	172.93
B2	8	157551	21931.6	65497.1	259112	87.4305
B3	8	141189	20474.7	68223.3	250939	271.591
B4	8	144110	20502.2	69267.6	241560	130.85
B5	8	142959	20214.2	75866.1	258067	0
B6	8	118370	16956	63618.9	214940	0
B7	8	122677	16588.4	63673.8	216952	0
B8	8	134162	18159.9	69628	241974	0
B9	8	121114	16815.5	61107	220939	590.278
B10	8	122018	18390.9	60147.9	227416	138.771
B11	8	142332	19127	61410	253513	0
B12	8	120604	17053.9	52952.3	238206	0
C1	8	61677.9	13834.5	49363.5	216512	249.417
C2	8	123447	20009.4	65718.8	255413	3493.38
C3	8	106857	18974.9	71154.8	258279	205.262
C4	8	117381	19404.1	72567	246144	689.037
C5	8	106302	17646.5	67844.2	226566	1737.43
C6	8	100084	16073.5	62808.4	206385	0
C7	8	99239.8	15583.1	61813.7	205099	0
C8	8	111502	18119.1	70729.8	236991	0
C9	8	103670	16573.9	64300.1	222261	178.906
C10	8	120973	18324	67594.6	247231	414.345
C11	8	121019	18137.3	64441.5	253368	265.994
C12	8	132600	19921	63470.5	280655	1412.95
D1	8	104230	17266.1	53173	222358	1348.99
D2	8	100198	16420.3	57187.7	221975	0
D3	8	122831	19723.4	66160.9	232221	917.949
D4	8	113929	18259.6	68337.3	231854	82.9197
D5	8	102335	16467.2	64877.2	214511	0
D6	8	101743	15519.5	63160.9	205407	0
D7	8	85695.4	13649.4	59469.2	193438	0
D8	8	109257	17263	69710.2	231601	0
D9	8	102590	16325.5	65292.3	226443	0
D10	8	98189.3	15777.4	61609.9	225907	0
D11	8	96933.5	15058.4	60418.5	247001	0
D12	8	134833	20249.7	70537.2	307412	0
E1	8	148369	27315.8	71346.7	273793	1004.83
E2	8	155634	25163.9	67670.8	257444	571.858
E3	8	137460	23752.4	69472.7	249004	731.03
E4	8	132216	21290.3	73783.1	251906	490.525
E5	8	136634	21811.6	72316.5	233867	6372.69
E6	8	147062	22975.3	79840.8	257342	0
E7	8	154976	23944.8	83644.8	262840	26.466
E8	8	136850	22883.8	78337.8	256383	228.494
E9	8	140045	23055.1	75535.8	263108	94.8674
E10	8	126328	20763.7	64164.4	237702	167.806
E11	8	139988	21839.7	63787.6	251584	0
E12	8	121545	12841.1	51365	275872	582.439
F1	8	140528	24709.9	67195.5	290385	0
F2	8	145528	24708.5	70975.9	278411	714.286
F3	8	152724	24883.8	72040	258271	298.696
F4	8	135347	23792.1	72803.6	247159	1498.12
F5	8	147487	22817.6	76410.3	254669	380.367
F6	8	152987	25318.1	85728.2	285220	730.638
F7	8	145605	23380.1	81290.7	269907	0
F8	8	158982	25679.7	87026.2	292707	71.9875
F9	8	146893	24002.7	78459.6	276749	0
F10	8	128860	20915.2	67420.4	253135	0
F11	8	114351	18391.6	53900.9	214691	0
F12	8	122793	21115.1	60306.2	272192	0
G1	8	119600	22802.2	63061.8	284675	0
G2	8	146153	24196.2	65422	266692	1058.04
G3	8	132894	22315.4	65748.4	252464	0
G4	8	133942	22281.8	72721.9	262718	280.251
G5	8	143297	23154.2	74547	259886	843.912
G6	8	148135	24682.2	82719.5	283757	606.905
G7	8	159729	26075.3	83561.8	288774	137.131
G8	8	167233	26986.6	85903.2	301806	130.786
G9	8	153289	23804.1	76090.8	276973	0
G10	8	144707	22286.4	71541.5	277575	0
G11	8	150737	23948	69172.3	289842	0
G12	8	126951	19759.3	53016.9	239195	632.341
H1	8	134855	21936	56421	263622	1829.85
H2	8	128323	21987.7	63642.8	275461	688.041
H3	8	123961	21630.6	68021.6	277275	0
H4	8	140264	22731	73122.4	280071	488.045
H5	8	138318	22014.3	70801	261459	0
H6	8	159656	25635.2	83856.2	306739	725.064
H7	8	152171	23322.6	68972.3	266912	0
H8	8	163119	26666.8	79275.7	293395	536.689
H9	8	148860	23744.8	74894.3	291700	0
H10	8	165011	29314.6	75344.6	304664	900.333
H11	8	155327	24998.5	72401.7	323882	220.571
H12	8	190811	31285.4	69624.5	310573	5395.71
A1	9	151792	22816.7	55778.6	257044	1130.55
A2	9	133166	20088.5	56593.8	235142	932.849
A3	9	132779	19185.6	59710.1	232403	1118.73
A4	9	135384	20407.1	66317.6	247807	147.483
A5	9	126836	18694.9	64761.8	235093	1846.26
A6	9	105521	16064.9	59705.4	213388	0
A7	9	122865	17576.3	63584	222918	333.03
A8	9	132317	18173.6	62816.6	227726	960.689
A9	9	134019	18836.3	64349.5	243338	811.966
A10	9	136889	19312.7	59115.3	232605	290.954
A11	9	143893	20699.9	61501.5	264794	0
A12	9	143764	20146.9	52728.5	257046	967.07
B1	9	133244	19234.7	51021.8	220627	146.007
B2	9	158277	21863.5	65669.3	260645	120.071
B3	9	139858	20715.6	68080	250545	208.116
B4	9	142885	20272.4	69321	241534	309.374
B5	9	142427	20147.8	76013	258664	0
B6	9	119444	16764.9	63267.9	215730	0
B7	9	122213	16767.1	63907.9	217205	0
B8	9	134295	17969.3	69475	241773	0
B9	9	121720	17015.8	61785.6	222378	2218.25
B10	9	122357	18461.1	59881.1	228312	355.483
B11	9	140978	18692	61231.3	254519	0
B12	9	121497	17260.7	52988.6	238171	0
C1	9	62022.1	13800	49160.9	216373	129.177
C2	9	123471	20057	65432.4	254308	3431.9
C3	9	105104	18448.6	69695.1	251080	371.796
C4	9	116437	18904.1	72251.7	245337	749.168
C5	9	106334	17627.4	67344.8	226753	1216.86
C6	9	100467	16009.4	62758	206257	0
C7	9	99663.5	15582.3	61665.8	204513	0
C8	9	111295	17658.2	70507.8	236273	0
C9	9	103835	16590.5	64331	222232	432.281
C10	9	120319	18336.2	67640.8	246924	501.883
C11	9	120132	18115.8	64548.2	253682	258.236
C12	9	133786	19679.4	63441.1	280074	1265.41
D1	9	104849	17241.8	53308.5	222336	1183.32
D2	9	100249	16424.7	57357.4	222441	90.5767
D3	9	122646	19807.5	66171.9	232999	1153.42
D4	9	113692	17970.3	68309.8	232468	142.427
D5	9	102624	16320	65139	214962	0
D6	9	102764	15884.8	63197.8	205692	0
D7	9	86085.9	13956.5	59164	193195	0
D8	9	109385	17196.1	69316.1	231141	0
D9	9	103003	16190.1	65477.6	226916	0
D10	9	98253.1	15768.4	61769.9	226214	0
D11	9	97596.7	14906.5	60566	247346	0
D12	9	134460	20465.9	70473.5	307668	189.077
E1	9	147882	27657.6	71445	274059	1477.8
E2	9	156071	25246.5	67569.5	256782	581.461
E3	9	136461	23654.1	69442.6	249002	695.441
E4	9	132657	21251	73402.2	251547	165.54
E5	9	136697	21592.7	72167.4	233593	6416.84
E6	9	147001	22922.8	79843.8	256673	0
E7	9	155427	24079.5	83924.4	262625	0
E8	9	136485	22684.3	78344.3	257121	0
E9	9	139919	22814.8	75989.4	263975	0
E10	9	126207	20605.6	64257.4	237723	602.302
E11	9	140538	21985.4	63667.5	252192	0
E12	9	122231	12745.6	51316.1	277029	737.819
F1	9	142322	24682.4	67231.1	290122	0
F2	9	144502	24849.7	70939.6	279084	559.449
F3	9	153429	25180.1	71956.4	258203	233.72
F4	9	134782	23917.9	72870.8	246305	1530.41
F5	9	147572	22891.6	76680.4	254833	295.31
F6	9	153278	25376.4	85585.7	285389	644.091
F7	9	144405	23444.6	80925.1	269731	0
F8	9	159472	26021.3	86604	292705	0
F9	9	146030	23808.3	78527.5	276412	0
F10	9	128388	20951	67453.1	253726	0
F11	9	114703	18606.6	53856.4	215879	0
F12	9	122654	20900	60000.8	271432	0
G1	9	119740	23038.3	63098	285268	0
G2	9	146581	24150.1	65525.1	266154	1086.2
G3	9	133955	22181.5	65952.3	252532	177.098
G4	9	134548	22443.7	72750.2	262796	721.155
G5	9	142860	23172.5	74514.5	260005	780.46
G6	9	149242	24608.4	82520.1	283746	442.63
G7	9	159395	26072.4	83870.2	288598	0
G8	9	166685	26545.9	85634.2	301131	0
G9	9	152816	23956.9	75895.1	277012	0
G10	9	144172	22570.5	71579	277265	324.268
G11	9	150570	23804.8	69238.7	290234	0
G12	9	128258	19554.5	53202.8	240251	302.942
H1	9	133776	21740.9	56472.7	262866	1187.28
H2	9	128774	21587	63474.9	275779	236.793
H3	9	123466	21386.9	68377.5	277018	0
H4	9	140867	22722.5	73181.3	279725	644.656
H5	9	139370	22055	71100.6	261353	0
H6	9	159333	25430.5	83913.4	306416	716.556
H7	9	151551	23194.6	68948.7	267424	0
H8	9	163418	26418.4	79320.6	294004	534.885
H9	9	147593	23526.8	74780	291879	0
H10	9	166109	29903.3	75241.1	304831	633.152
H11	9	155263	25087.1	72632.2	323273	378.321
H12	9	191341	31114.9	69761.3	311238	5939.33
A1	10	151562	22575.9	55256	256552	960.964
A2	10	132919	20045.2	56342.1	234681	947.729
A3	10	129363	18658.6	59037.8	229480	633.018
A4	10	135748	20252.3	65376.3	243491	0
A5	10	124673	18057.3	63120.8	227267	1932.19
A6	10	105089	15887.2	59697.9	213259	49.1329
A7	10	123390	17322.2	63348.4	223055	396.819
A8	10	132029	17807.2	62790.7	227530	901.084
A9	10	133903	18480.3	64394	243710	607.2
A10	10	136147	18525.9	58510.7	229842	304.856
A11	10	142769	20154.8	61323.7	264728	60.4016
A12	10	144892	20176.7	52989.1	260046	989.746
B1	10	133407	19695.8	51329.4	220663	23.8167
B2	10	158979	21900.5	65959.3	260315	224.988
B3	10	140468	20343.5	68165.6	250577	0
B4	10	143978	20658.4	69242.5	240796	671.493
B5	10	143106	20330.2	76152.8	258774	0
B6	10	118847	16800.4	63495.2	215540	0
B7	10	122273	16577.6	63727.2	216718	0
B8	10	134162	18186	69648.6	241070	0
B9	10	122306	16905.1	62059.8	223184	3449.28
B10	10	122632	18463.8	60290.6	228216	422.017
B11	10	141480	18480.5	61361	254113	0
B12	10	120035	17010.2	53139.3	238466	0
C1	10	62355.6	13570.7	49450.9	216383	346.096
C2	10	123854	20266.3	65712.8	254096	3773.58
C3	10	106270	18557.1	69274.2	249579	459.904
C4	10	116794	18669.5	72293.2	244658	696.923
C5	10	106273	17810.1	68020	226420	306.55
C6	10	99850.9	16363.3	62857.2	206575	0
C7	10	99348.2	15706.9	61563.8	204209	0
C8	10	111325	17951.9	70769	236725	0
C9	10	104060	16483.5	64361.8	222218	475.872
C10	10	120766	18510.1	67475.1	246293	99.2094
C11	10	120394	18362.8	64585.2	253423	553.047
C12	10	133196	19809.4	63605.1	281324	1302.63
D1	10	105383	17452.7	53133	222877	1352.04
D2	10	100487	16301.8	57181.6	223251	0
D3	10	122969	19592.5	66207.8	233048	914.27
D4	10	113942	18388.4	68197.1	231764	153.158
D5	10	102913	16528.9	65180.9	215061	0
D6	10	101817	15847.4	63293.3	205630	0
D7	10	86404.7	13958.9	59388.3	193433	0
D8	10	109610	17275.6	69537.9	231455	0
D9	10	103615	16259.7	65516.5	226521	0
D10	10	98740.7	15738	61811.5	226348	0
D11	10	97334.6	14985.5	60491.2	247725	0
D12	10	135282	20010.3	70959.4	307202	435.928
E1	10	148396	27569.1	71490.2	274015	1159.64
E2	10	156532	24971.2	67647.1	257376	360.612
E3	10	137795	23610.7	69324.1	248594	1125.4
E4	10	132486	21424.1	73823.3	252689	176.711
E5	10	136000	21269.6	72141.6	234102	6743.57
E6	10	146439	23124	79871	257213	136.145
E7	10	155340	24039.3	83514.6	262544	0
E8	10	135659	22644.6	78434.1	257311	0
E9	10	140237	23134.1	76003.5	263818	0
E10	10	126675	20609.5	64238.8	238050	0
E11	10	140746	21981.2	64091.4	252843	0
E12	10	121209	12921.9	51283.2	277450	700.642
F1	10	141326	24156.8	67417.3	289728	0
F2	10	145439	24598.8	71127.9	278863	1013.79
F3	10	152717	25049.2	72183.6	258318	142.56
F4	10	135802	23837.6	73149.8	246869	1398.31
F5	10	147187	22904.9	76789.3	254539	97.4809
F6	10	152354	25483.2	85743.9	285541	487.396
F7	10	145002	23172.4	81085.9	270139	0
F8	10	158974	26100.1	87185.6	293100	63.392
F9	10	146053	23820.2	78530.8	276912	0
F10	10	129350	20820.8	68010.4	253634	18.632
F11	10	114661	18423.2	53930.9	215380	0
F12	10	122141	20883.5	60365.7	272127	0
G1	10	120415	23503.7	63620.8	285294	0
G2	10	147898	24044.5	65898.3	266633	1673.16
G3	10	134028	22382.3	65976.3	252500	348.513
G4	10	134554	22232	73140.5	263510	220.452
G5	10	144402	23471.9	74581.4	259739	959.939
G6	10	149303	24361.7	82926.3	283933	557.622
G7	10	159910	26134.1	83770.7	288378	23.3414
G8	10	167016	27033.9	86338.6	301872	0
G9	10	153282	24141.2	76248.8	277307	0
G10	10	144615	22561.9	71805.2	277158	0
G11	10	150896	23681.5	69784.1	291395	0
G12	10	127086	19875.7	52743.4	239248	841.358
H1	10	132302	21612.4	56719.7	263664	1072.38
H2	10	129543	21998.4	63775.7	276407	717.082
H3	10	124456	21532.1	68699.1	277254	0
H4	10	140666	22547.1	73371.1	280100	727.514
H5	10	139159	22084.1	71345.4	262016	0
H6	10	160038	25336.3	83910.4	307267	505.748
H7	10	152282	23301.9	69171.7	268331	92.5926
H8	10	162781	26233	79551.8	294514	780.229
H9	10	148582	23734.2	74952.4	292706	0
H10	10	166767	29981.8	75299.1	305724	562.428
H11	10	155787	25247.1	72658.4	324395	315.501
H12	10	190340	31878.7	70346.5	311578	6236.47
A1	11	152459	23062.4	55481.8	256578	740.805
A2	11	132357	20190.4	56710.2	235004	731.399
A3	11	129986	18687.1	59087.7	229268	687.761
A4	11	131610	19323.6	63406.3	236206	0
A5	11	122070	17844	62202.5	223690	1724
A6	11	105341	15805.7	59967.5	213029	0
A7	11	122868	17440.9	63621	223234	376.108
A8	11	132584	17816.4	62822.6	227245	738.924
A9	11	133504	18373.3	64558.3	244161	661.94
A10	11	136187	18262.3	58511.7	229721	569.991
A11	11	143764	20317.1	61389	264599	6.96942
A12	11	144916	20247.1	53418	259804	960.401
B1	11	133942	19360.6	51249.2	221381	240.238
B2	11	158003	21767.8	66063.3	260459	318.247
B3	11	140562	20559.8	68444.9	251077	180.02
B4	11	143741	20437.4	69199.2	241435	441.238
B5	11	143118	20506.5	76246.3	259587	0
B6	11	119856	16937.4	63427.6	215832	0
B7	11	122575	16962.3	63900.2	216756	0
B8	11	133572	18277.3	69323.9	241470	0
B9	11	121434	16760.2	61721.3	222608	1857.24
B10	11	123204	18762.8	60326	228869	0
B11	11	140688	18599.3	61423.1	253859	0
B12	11	119406	17226.4	53252.6	239079	0
C1	11	62061	13695.7	49746.6	216820	4.87459
C2	11	123733	20147.2	65611.3	254201	3537.73
C3	11	105044	18352.5	69366.6	250649	203.326
C4	11	117385	19084.9	72127.1	244543	545.118
C5	11	106360	17555.6	67750.7	226375	227.109
C6	11	100700	16070.4	62733.6	207177	0
C7	11	99862.7	15587.8	61769.5	204356	0
C8	11	111581	17705.3	70591.1	236879	0
C9	11	104079	16726.5	64444.3	222696	68.1115
C10	11	121174	18574	67622.5	246367	293.738
C11	11	120848	18169.5	65054.3	253324	467.707
C12	11	133330	19575.7	63559	280638	1649.55
D1	11	104795	17300.2	53180	223430	1384.11
D2	11	100083	16451.3	57351.3	222374	133.302
D3	11	122916	19840.5	66368.1	233085	1040.28
D4	11	114438	18372	68355.9	231996	261.441
D5	11	102913	16431.7	65288.9	215369	0
D6	11	101746	15719.5	63637.3	205239	0
D7	11	86576	13728.6	59473.4	193356	0
D8	11	108899	17168.9	69302.2	230903	0
D9	11	103730	16284.5	65231.2	226407	0
D10	11	98322.9	15602.7	61812.4	227415	0
D11	11	97250.8	14993.6	60665	248269	0
D12	11	134904	20138.5	70427.2	307222	214.288
E1	11	147852	27547.2	71719	273566	1084.61
E2	11	156484	25188.1	67739.7	257700	658.277
E3	11	137564	23793.9	70016	249162	1150.41
E4	11	131647	21326.5	74040.5	252512	329.048
E5	11	136347	21534.8	72286.7	233513	7008.48
E6	11	146357	23013.2	79754.3	256669	0
E7	11	154404	24194.6	83838	262568	0
E8	11	136435	22713.6	78533.5	256607	0
E9	11	140648	23212	75775.1	263856	0
E10	11	126700	20511.7	64507	238293	0
E11	11	140355	21841.9	64107.1	252798	345.189
E12	11	120977	12680.7	51754.1	277123	1287.85
F1	11	141542	24843.2	67462.7	291042	0
F2	11	144101	24671.1	71172.1	278516	927.894
F3	11	152555	24978.3	72108.8	258669	0
F4	11	135404	23529.6	73166.8	246754	1800.49
F5	11	148413	22883.1	76440.4	254423	146.221
F6	11	153078	25476	85898.4	285869	949.283
F7	11	145859	23305.2	81177.6	269782	46.4682
F8	11	159227	25862.6	86683.7	292317	0
F9	11	146141	23757.6	78499	276109	0
F10	11	128206	20818.7	67566.3	254133	0
F11	11	114036	17966	54138.8	215505	0
F12	11	122476	20936.6	60682.1	272433	0
G1	11	119942	22810.5	63443.5	284034	0
G2	11	147803	24077.1	65750.7	266747	1524.79
G3	11	134519	22335.8	66021.2	252804	150.58
G4	11	134036	22157.8	72971.8	263403	328.447
G5	11	143884	23361.4	74484.8	259045	915.523
G6	11	149235	24484.6	83004.1	284385	361.405
G7	11	160285	26335.6	83810.1	288278	349.149
G8	11	167381	26795.3	86102	302350	0
G9	11	154213	24162.9	76167.3	277428	0
G10	11	145106	22666.3	71632.6	277450	38.4001
G11	11	150703	23433.6	69396.2	291206	0
G12	11	126905	19505.4	53016.9	239583	1078.16
H1	11	133349	21817	56544.5	263570	946.133
H2	11	129729	22049.7	63713.8	276450	316.097
H3	11	124794	21480.2	68570	277598	0
H4	11	141345	22888.3	73315	280168	515.361
H5	11	138861	22194.7	71202.6	261809	0
H6	11	159869	25386.2	84013.1	307642	443.357
H7	11	151977	23256.9	69540.8	267791	0
H8	11	164020	26492.4	79312.4	294219	341.858
H9	11	148478	23415.9	75189.5	292053	0
H10	11	168640	30362.8	75840.7	305652	231.258
H11	11	154828	25167.1	72764.7	324297	455.103
H12	11	190749	31249.9	69985.5	312893	5961.28
A1	12	152599	22637.3	55189.6	255902	1645.24
A2	12	132792	19782.9	56844.3	235078	657
A3	12	130263	18645.8	58938	229012	1070.96
A4	12	129507	18885.5	63128.9	234097	0
A5	12	121615	17347.8	61740.3	222617	1413.93
A6	12	104458	15960.5	59918.8	213378	95.7244
A7	12	123340	17474.4	63607	223448	540.138
A8	12	132910	17950.4	63127.9	227722	771.356
A9	12	133337	18585.5	64729.5	244267	755.199
A10	12	134933	18597.3	58268.7	229058	198.603
A11	12	142828	20248.5	61257.3	265259	271.807
A12	12	144022	20516.6	53171.3	260263	1401.92
B1	12	133837	19484.3	51358.3	220610	114.942
B2	12	158550	21776.2	65773.3	260757	262.292
B3	12	141283	20532.1	68680.9	250721	252.861
B4	12	143337	20234.1	69643	241664	150.122
B5	12	143775	20475.8	76473.4	259490	0
B6	12	119859	16850.3	63610.2	215864	0
B7	12	122152	16699.8	63850.3	217065	0
B8	12	134277	17908.8	69891.7	241962	0
B9	12	121698	16712.1	61606.2	222948	1215.63
B10	12	122321	18604.2	60334.4	229200	43.7225
B11	12	141632	18452.1	61426.3	254209	0
B12	12	120585	17009	53195.9	238818	0
C1	12	62584.7	13717.3	49493.4	216436	121.865
C2	12	123709	19775.2	65616.3	254107	3611.31
C3	12	105328	18320.8	69162.5	249658	272.07
C4	12	117517	19112.8	72131.1	243918	504.702
C5	12	107171	17570.2	68026.5	227029	618.708
C6	12	100577	16330.8	62966.9	206752	0
C7	12	98886.9	15601.9	61927.8	204187	0
C8	12	111371	17758.9	70711.6	237016	14.4949
C9	12	104063	16554.5	64522.3	222766	108.07
C10	12	121213	18420.8	67565.6	246134	318.054
C11	12	121555	18385.3	64736.5	253755	386.8
C12	12	132799	19680.7	63552.6	280666	1548.53
D1	12	105176	17295.3	53144.6	222877	1561.99
D2	12	100529	16313.3	57137.5	222901	0
D3	12	123236	20077.4	66584.6	232937	1054.08
D4	12	114790	18268.3	68472.6	232477	61.4581
D5	12	103273	16297.3	65140.8	215193	0
D6	12	102345	16052.7	63559.8	205241	0
D7	12	86121.9	13840.9	59272.4	193638	0
D8	12	108772	16980.8	69584.4	231389	0
D9	12	103774	16183.5	65306.9	226602	0
D10	12	97777.5	15792.6	61915.5	226833	0
D11	12	96743.3	14952.1	60748.9	247540	0
D12	12	134157	20015.6	70711.8	307584	307.776
E1	12	148734	27338.7	71051.1	273102	853.819
E2	12	157601	25277.4	67996	257572	929.27
E3	12	137216	24060.9	70057.7	249273	792.591
E4	12	132283	21195.7	73920.1	253002	0
E5	12	137298	21231	72505.4	234106	7294.98
E6	12	146540	23054	80047	257290	0
E7	12	154040	24152.3	83829	262532	0
E8	12	135959	22909.9	78382.7	257258	0
E9	12	139127	22951.2	75958	264094	0
E10	12	126048	20824	64636.2	237898	0
E11	12	140526	21830.1	63974.5	252557	236.853
E12	12	121719	12738.8	51459	278006	1138.19
F1	12	140282	24626.2	67474.9	291009	0
F2	12	143968	24643.1	71209.5	278626	708.635
F3	12	152650	24973.4	72402	258198	121.224
F4	12	135763	23649.5	73169.8	247135	1334.71
F5	12	147980	22858.4	76639.6	254976	322.069
F6	12	152774	25607	85851.2	286217	693.286
F7	12	145260	23145.9	81198	270056	0
F8	12	158214	25710.2	86694.5	293111	141.826
F9	12	146363	24041.6	78350.2	277082	0
F10	12	128419	20824.1	67829.7	254232	0
F11	12	115317	18332.6	54083.9	215097	0
F12	12	120928	20833.8	60461.6	272398	0
G1	12	120580	23160.6	63440.9	285642	0
G2	12	149416	24379.3	65627	267252	1378.6
G3	12	134632	22401.7	66245.2	253023	0
G4	12	133704	22111.7	73014.7	263265	397.171
G5	12	144389	23119.5	74723.4	259422	1139.42
G6	12	149387	24367.2	83045.9	284492	376.92
G7	12	160855	26413.7	83734.2	288587	0
G8	12	167620	26807.1	86303	301864	0
G9	12	154578	24428	76009.3	277604	0
G10	12	145092	22697.5	72041.1	278390	0
G11	12	152531	24015.7	69611	290888	9.08726
G12	12	127669	19649.9	53229.3	240216	841.358
H1	12	135197	22354.7	56278.8	263806	1055.36
H2	12	131046	22377.6	63905.3	276103	683.573
H3	12	126060	21652.3	68919.9	277833	0
H4	12	140963	22716.8	73300	280627	398.813
H5	12	139834	21972.7	71023.4	262031	0
H6	12	160602	25743.9	83949.2	307404	665.508
H7	12	152054	23390.9	69274.9	267432	0
H8	12	163745	26295.2	79593.1	293781	358.094
H9	12	148603	23919.3	74868.1	292927	0
H10	12	170093	30343.2	75653	305186	772.356
H11	12	154525	25142.8	72814.4	324436	329.461
H12	12	190180	31619.4	69990.4	312379	5991.67
A1	13	151748	22554.3	55455.3	255988	1863.91
A2	13	133832	19782.9	56649.2	234436	661.579
A3	13	130720	19049.7	58878.3	228621	317.505
A4	13	129644	18922.1	62912.6	233470	339.019
A5	13	121547	17454.9	61835	222396	1485.69
A6	13	105205	15864.3	59665.1	213507	0
A7	13	122819	17461.6	63885.4	223204	446.525
A8	13	132559	17909.1	63058.9	227046	672.307
A9	13	133791	18760.1	64720.5	243573	263.559
A10	13	136319	18468.9	58445.6	228535	551.124
A11	13	144134	20375.3	61605	265065	372.864
A12	13	145047	20132	53535.7	261130	940.392
B1	13	134078	19701.2	51520.8	222066	268.197
B2	13	158436	21686.5	65846.1	260641	391.689
B3	13	140784	20690	68457.2	250946	0
B4	13	142919	20603.4	69771.8	241530	209.968
B5	13	143333	20393.6	76547.3	259503	0
B6	13	119774	16927.3	63525	216597	0
B7	13	122232	16665.7	63965.6	217671	0
B8	13	133650	18240.2	69951.8	241759	0
B9	13	122184	16708	61415.9	222200	772.494
B10	13	122092	18502.1	60280.3	228965	265.186
B11	13	139978	18513.2	61600.6	254408	194.77
B12	13	120709	17004.3	53626.5	238253	0
C1	13	62617.4	13709.5	49469.7	216292	220.982
C2	13	124227	20041.5	65671.6	253747	3907.63
C3	13	106160	18644.5	69361.7	249381	285.625
C4	13	117044	18806	72424.6	244585	622.006
C5	13	106823	17516.5	67835.8	225773	340.196
C6	13	99901.9	16074.3	63144.1	207119	0
C7	13	99564.3	15661.5	61767.1	204563	0
C8	13	111698	17934.4	70721.2	237342	0
C9	13	104807	16669.5	64848.7	223050	0
C10	13	121449	18569.3	67619.6	245988	351.123
C11	13	120867	18148	64986.8	253001	481.007
C12	13	133503	19387.9	63503.9	281191	2036.35
D1	13	105438	17348	53454	223003	1631.46
D2	13	100266	16338.1	57194.6	223332	33.3254
D3	13	123603	19814.9	66272.3	232771	916.11
D4	13	114089	18364.4	68548.1	232618	225.346
D5	13	103121	16336.3	65544.2	215259	0
D6	13	102705	15777.8	63390.5	206223	0
D7	13	86121.9	13576.7	59310.8	193709	0
D8	13	109224	17008	69751.8	231980	0
D9	13	103255	16698.3	65393.2	226925	0
D10	13	98829.5	15680.6	61899.2	226969	0
D11	13	97961.4	14838.6	60910.5	248413	0
D12	13	135305	20144.8	70610.1	306904	278.364
E1	13	147719	27481.5	71411.6	273327	963.039
E2	13	156216	25487.7	67747.2	256941	523.848
E3	13	137504	23871	69889.6	250164	647.347
E4	13	132053	21270.2	73929.3	253256	0
E5	13	136571	21597.5	72403	233740	6819.12
E6	13	146608	22988.9	80046	257689	0
E7	13	154120	23812.3	83915.4	262846	0
E8	13	135898	22445.1	78446.9	257323	0
E9	13	140456	23080	76189.7	263459	0
E10	13	126828	20567	64716.5	238631	39.9537
E11	13	141514	21879.4	64191.6	252411	0
E12	13	121892	12571.4	51522.9	278039	1050.49
F1	13	141013	24009.1	67710.2	290343	0
F2	13	144949	24797.2	71359.2	278882	394.44
F3	13	154084	25120	72262.3	258560	492.655
F4	13	135778	23619.8	73261.2	247333	1464.85
F5	13	147936	22849.9	76842.7	254850	176.804
F6	13	152930	25479.6	86105.6	286154	447.311
F7	13	144713	23360.2	81570.5	270490	0
F8	13	159691	25683.9	87156.5	293353	0
F9	13	146772	23873.1	78592.1	276782	0
F10	13	128199	20517.1	67661	253811	0
F11	13	114506	17991.2	53795.4	216139	0
F12	13	121472	20709.7	60773.7	273178	0
G1	13	121447	23071.7	63711.3	285165	0
G2	13	150156	24119.8	65901.5	267156	1262.72
G3	13	136460	22296	66177.3	253009	107.016
G4	13	134503	22066.5	73304.7	264055	430.194
G5	13	144550	23342.3	74845	259482	877.451
G6	13	149675	24637.6	83075.5	284192	562.186
G7	13	161657	26622.9	83860.4	288854	50.5731
G8	13	169442	26711.4	86582.8	302066	0
G9	13	155583	24065.3	76313.4	277143	0
G10	13	146115	22574.8	72103.3	278264	20.2667
G11	13	152819	23616.6	69634.4	290912	0
G12	13	128170	19961.2	53278.4	240476	730.235
H1	13	135835	21709.1	56972.4	264246	1110.68
H2	13	132492	22170.1	64504.8	276607	542.838
H3	13	127510	21837.9	68801.9	278204	0
H4	13	142406	23098.8	73495.4	280908	444.339
H5	13	140588	22199.7	71366.9	262113	0
H6	13	160823	25383.4	84269.6	308325	821.487
H7	13	152754	23099.5	69470.8	268468	0
H8	13	165738	26708.9	79714.2	294255	666.577
H9	13	150080	23830.6	75104.3	292934	0
H10	13	169511	31160.6	76334.5	306238	345.764
H11	13	155478	25208.5	72760.5	324755	770.603
H12	13	190986	31622.9	70522.8	312275	5866.74
A1	14	153859	22821.6	55532	256582	870.223
A2	14	134611	20177.5	56776.7	234923	260.969
A3	14	131200	18709.8	59164	228722	351.345
A4	14	130274	19273.9	63066.9	232415	203.986
A5	14	121798	17642.6	61916.5	222623	1494.55
A6	14	105317	16184.7	60339.6	213781	91.4888
A7	14	122938	17286.3	63915.9	224061	585.701
A8	14	131959	17947	62878.7	227498	792.393
A9	14	133751	18821.8	65278.6	245028	415.613
A10	14	137693	18595.4	58784.8	228462	490.55
A11	14	144207	20392.5	61674.8	265456	118.48
A12	14	145088	19981.7	53272.5	261200	701.626
B1	14	135058	19628.6	51288.3	222041	0
B2	14	158033	21746.3	66151.2	261356	391.689
B3	14	141319	20612.1	68755.1	251490	162.33
B4	14	144334	20394.2	69669.2	242215	22.3155
B5	14	143154	19934.8	76609	259238	0
B6	14	119745	16707.4	63981.4	217007	0
B7	14	122724	16594.2	63864	217044	0
B8	14	134702	17984.7	69972.4	242210	0
B9	14	121556	16774.8	61777.2	222851	891.405
B10	14	122247	18462.9	60306.4	229070	0
B11	14	140220	18523	61439.4	254765	0
B12	14	120223	16779.8	53365.9	238025	0
C1	14	62692.6	13579.3	49639.6	216446	240.48
C2	14	124305	19793.8	65532.9	253833	3922.75
C3	14	106032	18431.3	69506.5	249920	407.62
C4	14	116603	18923.3	72654.9	245177	408.099
C5	14	107093	17618.3	67967.6	226463	374.777
C6	14	100591	16151.9	63018.9	207321	0
C7	14	99788.9	15724.9	61974.4	204668	0
C8	14	111945	17811.5	70843.6	238225	0
C9	14	104653	16582.6	65046.3	224565	721.982
C10	14	121466	18449.9	67728.5	246713	408.509
C11	14	121066	18266.1	65104.4	253329	55.4155
C12	14	134144	19718.8	63696.1	280947	1661.51
D1	14	105966	17175.3	53328.5	222876	1477.25
D2	14	100725	16121.4	57389.4	222991	0
D3	14	124074	19858.8	66698.8	232877	805.735
D4	14	114694	18216.4	68446.1	232370	342.41
D5	14	103835	16276.4	65484.6	215496	0
D6	14	102764	15736.1	63817.4	205878	0
D7	14	86608.9	13815.9	59450	193500	0
D8	14	109198	17000.2	69707.2	231742	0
D9	14	104399	16216.8	65523.3	227232	0
D10	14	98348.7	15714.7	62002.3	227475	37.5546
D11	14	96922.6	14622.8	60765	247942	0
D12	14	133450	19974.3	70947.1	307657	130.253
E1	14	147434	27486.7	71609	273774	985.833
E2	14	156565	25041.7	68028.3	257534	458.767
E3	14	138404	24130.3	70181.2	249897	348.201
E4	14	132394	21150.4	74019.9	253460	0
E5	14	136811	21542.5	72367.2	233696	6630.73
E6	14	148116	23035.5	80055	257412	0
E7	14	155859	23953.5	83824.5	262308	28.6715
E8	14	135877	22430.5	78629.7	257323	0
E9	14	140130	23031.3	75960.2	263764	165.745
E10	14	126857	20713.3	64653.8	238543	0
E11	14	140257	21660.8	64304.4	252890	0
E12	14	122156	12856.9	51741.9	278100	1215.4
F1	14	141196	24605.3	67992.1	291197	0
F2	14	145059	24581.3	71569	278808	417.044
F3	14	152833	25273.6	72314.4	258596	560.54
F4	14	136307	23445.4	73211	247135	1671.32
F5	14	147920	22756.9	76955.4	255544	314.424
F6	14	153272	25587.3	86445.2	286054	182.204
F7	14	144933	23172.4	81683.6	270088	345.607
F8	14	159428	25647.1	87465.6	293125	58.0198
F9	14	146390	24342.9	78725.6	277477	0
F10	14	128287	20918.5	67803.6	254778	0
F11	14	114195	18023.9	54132.6	216354	0
F12	14	122772	20747.5	60546.5	273511	0
G1	14	123687	23218.9	63543.1	285289	0
G2	14	151609	24470.3	65596.7	267870	945.415
G3	14	138470	22356.1	66332.4	253208	0
G4	14	135083	22271.8	73545.4	263785	418.591
G5	14	144954	23408	74882.2	260903	647.211
G6	14	150782	24573.9	83366.7	284785	142.372
G7	14	165164	26567	84045.6	289244	491.143
G8	14	173023	27420.9	86408.8	302533	0
G9	14	158234	24220	76234.9	277243	0
G10	14	147621	22848.2	72031.5	278059	292.268
G11	14	155469	24352.4	69669.6	291564	77.8908
G12	14	130397	19811.2	53059.4	239603	361.149
H1	14	138734	22576.8	57261.1	263815	1557.5
H2	14	134730	22455.1	64226.4	276970	760.643
H3	14	129953	21900.2	68900.7	278594	0
H4	14	143362	23091.2	73626.3	280887	319.596
H5	14	143520	22232.1	71449.9	262579	0
H6	14	163076	25910.2	84270.6	307152	665.508
H7	14	153211	23411.7	69637.9	268027	0
H8	14	166660	26833.1	80029.8	294179	520.453
H9	14	150933	23937.7	75239.9	292912	0
H10	14	172545	31255.2	75589.3	304856	655.604
H11	14	154844	24907.1	72923.4	323984	517.923
H12	14	191341	30971	70722.2	312398	6179.07
A1	15	152621	22901.3	55650.1	256025	1411.69
A2	15	135833	19992.5	56992.9	234017	848.149
A3	15	131548	18704.9	59208.1	229527	464.811
A4	15	129088	18985.9	62617.4	232934	101.514
A5	15	122279	17604	61968.3	222148	1033.87
A6	15	105205	15880.7	60197.7	213862	0
A7	15	124216	17352.4	63916.7	223974	598.128
A8	15	133391	17980.7	63194.3	228149	724.023
A9	15	133432	18871	64822.5	244985	87.1773
A10	15	138667	18802	58559.3	228724	0
A11	15	144023	20362.8	61625.3	265412	0
A12	15	145431	20308	53653.3	261507	1273.86
B1	15	134885	19596	51419	221988	335.505
B2	15	158068	21477.2	65951.2	261286	108.414
B3	15	141364	20752.5	68972.5	251661	0
B4	15	144493	20629.9	69772.8	241565	146.065
B5	15	143138	20332.1	76500.1	259224	38.0386
B6	15	120245	17104	63957.7	216690	0
B7	15	122861	16620.8	63857.1	217439	0
B8	15	134414	17685.7	70123.5	242694	0
B9	15	122407	16692.6	61675.6	222326	707.478
B10	15	121933	18658	60576.9	229002	1.90098
B11	15	140866	18521.9	61926.4	254845	99.6239
B12	15	121103	16899.1	52954.6	238335	0
C1	15	63242.8	13801.7	49803.7	216298	169.798
C2	15	124262	19961.7	65356	253993	3974.15
C3	15	106753	18464.9	69540.5	249554	476.364
C4	15	116801	19014.7	72556.1	244908	222.779
C5	15	107248	17314.8	68030.3	226437	114.956
C6	15	100152	16097.3	63407.5	206984	0
C7	15	101140	15762.5	62153.6	204693	0
C8	15	110922	17968.6	70648.5	237424	0
C9	15	104952	16661.6	65170.6	224674	704.727
C10	15	121776	18717.8	67945.2	246848	415.318
C11	15	121182	18091.1	65429.9	253470	0
C12	15	133266	19596.7	63611.5	279988	1216.23
D1	15	105680	17414.5	53373.9	222717	1607.79
D2	15	101463	16284.1	57371.2	223458	0
D3	15	123867	19996	66420.6	233280	665.927
D4	15	115510	18194.3	68812.8	233227	0
D5	15	102627	16370	65700.7	215297	0
D6	15	102790	15845.7	63849.8	205786	0
D7	15	86636.6	13711.7	59545.1	193771	0
D8	15	109076	17051.6	69785.4	231951	0
D9	15	106214	16435.2	65520.3	227587	0
D10	15	98431.4	15784.5	62252.8	228152	0
D11	15	96838.9	14842.6	61067.2	247953	0
D12	15	133914	20023	70828.9	307892	332.986
E1	15	147647	27366.9	71477.4	274077	776.89
E2	15	157120	25271.9	68128.5	258132	708.422
E3	15	137636	23938.5	70275.4	249987	1309.12
E4	15	131565	21159.5	74182.6	253498	37.5765
E5	15	136483	21387.3	72794.7	234378	6937.84
E6	15	146473	22824.7	80114.4	257650	0
E7	15	154227	23830.8	83677.4	262998	0
E8	15	136309	22460.8	78822.1	257571	0
E9	15	140667	22985.8	76132.3	264004	0
E10	15	126697	20406.9	64970	238718	0
E11	15	141304	21960.8	64378.5	253433	0
E12	15	122409	12649.2	51861.2	278927	1154.39
F1	15	140936	24737.3	67634.2	290440	0
F2	15	144795	24660.6	71412.5	279162	584.313
F3	15	153567	25128.9	72569.2	258929	199.777
F4	15	135859	23881.2	73249.1	247720	1362.11
F5	15	148116	22696.2	76926.3	255336	106.082
F6	15	153628	25664.5	86265.7	286608	597.629
F7	15	145072	23034.9	81455.4	270480	212.979
F8	15	158970	25908.8	87281.4	293461	93.4763
F9	15	146530	23839.7	78993.7	277882	0
F10	15	128264	20552.9	68064.9	254520	0
F11	15	113324	18228.3	54074.6	216667	0
F12	15	120637	20736.9	60716.3	273108	0
G1	15	127599	23655.1	63491.4	285736	0
G2	15	156159	24748.9	65718.2	266788	1212.9
G3	15	142032	23150.6	66475.9	252719	0
G4	15	135676	22312.6	73570	264119	394.493
G5	15	146923	23563.2	74885	260086	929.119
G6	15	151092	24735.9	83374.1	284685	422.552
G7	15	172045	27287.2	84186.5	289592	0
G8	15	178728	27654.2	86476.9	302794	0
G9	15	163648	25047.8	76199.1	278095	0
G10	15	150814	23241	72150.5	278905	0
G11	15	159849	24320.6	69393.6	291364	0
G12	15	132954	20398.8	53010.3	240540	701.132
H1	15	146146	22802.1	56824.5	265194	1757.51
H2	15	141225	23465	64340.2	276803	595.334
H3	15	135884	22740	69242.5	277888	0
H4	15	146558	23374.6	73624.4	281099	179.375
H5	15	146732	22813.2	71445.8	262555	0
H6	15	165674	25904.4	84486.5	307885	805.416
H7	15	156484	23232.7	69417.5	268279	0
H8	15	169949	26823	79793.1	294136	340.054
H9	15	153597	24120.9	75330.9	293014	0
H10	15	174786	31271.4	75582.4	305958	508.542
H11	15	154587	24838.5	72788.1	325278	312.708
H12	15	190770	31773.9	70539.3	312573	6145.3
A1	16	152733	22803.4	55123.1	257400	611.387
A2	16	138932	20340.3	56800	235211	661.579
A3	16	132112	18800.4	59183.6	229910	514.576
A4	16	130051	18989.7	63092.2	233372	0
A5	16	124751	17617.7	62010.4	222596	1113.6
A6	16	105762	15687.5	60298.5	213862	0
A7	16	123662	17546.9	64030.3	224290	437.412
A8	16	133675	17850.1	63246.9	228031	748.566
A9	16	134621	18832.4	65230.1	244726	301.066
A10	16	141796	19239.3	58492.3	228838	393.234
A11	16	143396	20640.5	61520.6	266038	243.93
A12	16	144543	20257.9	53787.5	261885	1143.14
B1	16	134754	19613.4	51617.5	222427	357.251
B2	16	159387	21525.1	66064.5	261529	331.07
B3	16	142732	20502.4	68685	251781	637.876
B4	16	146180	20464.9	69894.6	242726	240.399
B5	16	143349	20171.6	76774.4	259727	0
B6	16	120712	16714.2	64141.1	216717	0
B7	16	122169	16718	64177.3	217925	0
B8	16	134673	18051.5	70188.3	242888	0
B9	16	122641	16637.2	61643.5	222478	262.631
B10	16	122900	18493.9	60696.3	229463	107.405
B11	16	140723	18473.9	61722.7	255145	0
B12	16	120333	17022	53433.9	239202	0
C1	16	63697.5	13726.7	49890.3	216899	31.6848
C2	16	124434	20130.6	65902.7	254180	4133.4
C3	16	106249	18343.9	69515.3	250063	554.789
C4	16	117406	19029.1	72765.6	245427	319.382
C5	16	107142	17422.9	68106	226292	562.632
C6	16	101311	16208.9	63494.5	208288	0
C7	16	101658	15915.3	62041.1	205021	0
C8	16	111737	17690.5	71093.3	238401	0
C9	16	104936	16928.4	65422.6	225473	889.99
C10	16	122525	18709.3	67920.1	246664	197.446
C11	16	121472	18243.6	65138.1	253280	504.281
C12	16	134854	19725.4	63617.9	281006	1201.61
D1	16	106939	17254	53625.6	222990	1580.31
D2	16	101190	16236.4	57546.1	222984	0
D3	16	123899	19659.3	66524.7	233028	979.575
D4	16	115543	18415.3	68826.6	232511	4.87763
D5	16	103683	16427.2	65616.8	215946	0
D6	16	102983	15913.5	63821	206603	0
D7	16	87857.6	13592.1	59771.9	193933	0
D8	16	110938	17274.6	69981.5	232184	0
D9	16	106815	16378	65848.3	226973	0
D10	16	98944.9	16036.3	62244.6	227801	0
D11	16	97079.3	14515.4	60914.6	248376	0
D12	16	134692	19959.4	71066.3	307633	689.082
E1	16	148792	27380.4	71820.2	273626	815.829
E2	16	156063	25080.2	68049.9	257634	273.126
E3	16	138828	23965.5	70609.7	250092	853.189
E4	16	131796	20985.4	74327.7	253692	0
E5	16	136744	21292.7	72720.2	234333	6955.5
E6	16	146659	22893.7	80247.1	257734	147.076
E7	16	154946	23819.9	84234.3	262984	60.6512
E8	16	136056	22384.5	78797.5	257622	0
E9	16	139782	22833.2	76058.7	263314	0
E10	16	127092	20474.1	64824.2	239106	304.647
E11	16	141163	21848.3	64354.5	253428	0
E12	16	122622	12689.5	51897	278872	1287.85
F1	16	141624	24418.3	67783.8	291448	0
F2	16	145571	24380.6	71513.4	279868	1055.61
F3	16	153351	25102.3	72760	259034	338.458
F4	16	136430	23679.2	73560.2	248325	1296.55
F5	16	148719	22995	77395.6	255582	199.74
F6	16	153462	25246.3	86343.4	286539	540.235
F7	16	145141	23281.5	81565.6	271271	86.1597
F8	16	159768	25481.1	87533.4	293613	0
F9	16	147543	23970.3	78979.5	277543	0
F10	16	128686	20609.3	68010.4	254428	0
F11	16	114835	18283.1	54221.5	216624	0
F12	16	121677	20745.2	60769.2	273628	0
G1	16	132900	24649.8	63610.4	286425	0
G2	16	163709	25728.6	66063.2	267763	1731.64
G3	16	149092	23682.1	66606.1	253474	0
G4	16	137625	22478.1	73593.8	264836	418.591
G5	16	149711	23979.4	75013.1	260224	974.442
G6	16	152250	24862.4	83051.4	284728	57.4963
G7	16	182620	28240.8	84089.9	289504	320.945
G8	16	191410	28744.2	86903.6	302653	0
G9	16	173884	25808.7	76534.9	278165	0
G10	16	157129	23681.1	72085.1	278563	0
G11	16	166640	25362.8	69815.4	291643	0
G12	16	138238	20620.4	53018.2	240708	853.264
H1	16	156161	24324.8	57088.7	265149	1459.63
H2	16	154571	26003.6	64642.2	278060	580.814
H3	16	145122	23442	69188.1	278855	0
H4	16	151398	23781.2	73905.8	280995	391.528
H5	16	155305	23455.7	71674	262977	0
H6	16	170597	26660.9	84634.6	309240	692.922
H7	16	160528	23958.2	69698.2	267847	0
H8	16	173893	27309.8	80216	294556	379.742
H9	16	158465	24717	75384.1	293471	0
H10	16	175759	31633.9	75985.2	306174	354.745
H11	16	155321	24977.1	73131.8	325438	460.687
H12	16	191737	31521.7	70686	313783	6666.98
A1	17	158245	23205.2	55431.7	256207	929.725
A2	17	145633	21421.2	57107.1	235070	903.089
A3	17	134060	18882.2	59260.9	229912	728.568
A4	17	131649	18853.6	63109.2	232614	99.5989
A5	17	128207	18150.7	61912.2	222320	793.785
A6	17	105980	16002.9	60233.8	214421	111.82
A7	17	124187	17641.7	64155.5	223973	623.809
A8	17	134033	17887.2	63074.4	227704	575.887
A9	17	134525	18757.2	65095.5	245123	603.146
A10	17	147625	20048.4	58559.3	229220	154.91
A11	17	143169	20233.6	61960.6	266588	348.471
A12	17	145822	20198.4	53520.5	261233	821.676
B1	17	137886	20311	51721.4	222254	67.3081
B2	17	159132	21716.4	66309.5	261518	0
B3	17	144099	20703.3	68924.1	251998	85.3276
B4	17	149003	20759.6	70258.9	242059	187.653
B5	17	143482	20272.7	76543.2	259208	0
B6	17	120582	16981.4	64217.4	216836	0
B7	17	123846	16775.4	63994	218162	0
B8	17	134842	18092.1	70398.5	243444	0
B9	17	123457	16774.8	61785.6	223513	226.701
B10	17	123228	18676.2	60755	229373	156.831
B11	17	142661	18673.5	61629	255143	0
B12	17	121222	17004.3	53368.2	238740	99.4963
C1	17	64437.1	13698.3	49767	216515	114.553
C2	17	125750	20022.8	65947.9	254271	4188.83
C3	17	107508	18289.1	69636.8	250595	257.546
C4	17	118622	19059.9	72674.7	245489	444.572
C5	17	106891	17411.1	67989.1	226153	263.559
C6	17	101556	16113.9	63377.4	207775	0
C7	17	104082	15761.7	62380.2	205084	0
C8	17	111334	18052.6	71163.1	238626	0
C9	17	105693	16962.6	65526.9	225883	849.123
C10	17	123277	18637	67991.4	247632	643.888
C11	17	121265	18311.2	65380.9	253268	454.407
C12	17	136130	19989.3	63485.9	280600	1826.33
D1	17	108130	17452.7	53316.2	223255	1378.76
D2	17	101951	16323	57268.2	222802	0
D3	17	124011	19921.9	66654.6	234034	799.297
D4	17	116235	18202.9	68528.5	232793	28.2903
D5	17	104774	16468.1	65714.6	215685	0
D6	17	105018	15911.8	64035.3	206452	0
D7	17	89114.5	14127.8	59762.8	193963	0
D8	17	110595	17026.4	70046.8	232177	0
D9	17	110561	16990.9	65836.7	228241	0
D10	17	99884.9	15736.2	62380.2	228055	0
D11	17	97002.5	14761.6	61079.3	249148	0
D12	17	134944	19966.8	71061.1	307675	202.733
E1	17	147882	27410.6	71479.4	273163	1077.01
E2	17	156301	24852.2	68091.9	257834	328.605
E3	17	139288	24012.7	70828.4	250677	775.277
E4	17	131287	21011.5	74183.6	254181	0
E5	17	138031	21560.8	72584	234472	6280.46
E6	17	146594	22915.1	80498.6	257693	0
E7	17	154700	23941.6	84389.3	263005	0
E8	17	136006	22279	78635	257555	0
E9	17	139238	23037.8	76227.6	263452	165.745
E10	17	127506	20790.4	64950.4	238645	128.851
E11	17	141401	21488.3	64313.8	253699	0
E12	17	123146	12937.6	51897.9	278949	1297.38
F1	17	142351	24402.6	67847.5	291235	0
F2	17	145362	24495	71524.8	279177	419.304
F3	17	153845	25035.4	72925.2	259312	334.579
F4	17	136744	23576.2	73566.2	248091	1681.11
F5	17	149172	22996.9	77249.9	256053	0
F6	17	153582	25485	86591.3	287037	691.464
F7	17	144969	22963.7	81608.5	271237	52.2767
F8	17	160083	25536.8	87595.9	293751	32.2332
F9	17	147574	23944.4	78754.1	277666	0
F10	17	128125	20648.3	68097.5	254889	0
F11	17	113952	18293.6	54466.6	216169	0
F12	17	121076	20658.9	60854.1	273805	0
G1	17	146041	26001.5	63896.4	285577	0
G2	17	177298	27164.4	66074	267834	1244.31
G3	17	162956	25225.4	66641.5	252848	0
G4	17	140531	22430.2	73838.2	264089	224.022
G5	17	154800	24234.1	75234.9	261258	926.4
G6	17	157673	25009	83491.9	285595	343.152
G7	17	204571	30023.5	84293.9	289255	249.948
G8	17	215656	30699.5	86791.3	303109	0
G9	17	193038	27279.1	76478.3	278163	0
G10	17	169466	24965	72598.6	279080	219.734
G11	17	183489	27241.5	69755.5	291349	0
G12	17	148359	21961.1	53258.5	240640	305.588
H1	17	174382	26708.9	56843.2	264858	1563.18
H2	17	173849	26977.8	64608.4	277380	753.941
H3	17	164698	25766.7	69096.3	278535	0
H4	17	161001	24839	73906.8	280867	519.913
H5	17	169935	24885.5	71867.3	262724	0
H6	17	180232	27080.1	84493.2	308425	663.617
H7	17	169724	24708.7	69708.7	267975	0
H8	17	183300	28109.8	79791.3	294524	358.094
H9	17	167420	25532.9	75628	293253	0
H10	17	181611	32331.2	76120.6	305265	836.344
H11	17	156452	25087.1	73061.4	324208	157.75
H12	17	191833	31498.6	70499.7	312900	6557.24
A1	18	160994	23515.7	55898.1	257598	725.929
A2	18	157017	22794.9	56904.2	234911	1107.97
A3	18	137394	19244.7	59302	229831	236.884
A4	18	133697	19381.8	62806.4	232765	0
A5	18	135298	19152.4	61922.7	222830	1287.24
A6	18	106974	16162.7	60209.4	214407	0
A7	18	126222	17525.4	64190.9	224698	475.52
A8	18	135674	18267	63441	228158	644.258
A9	18	135419	18765.9	65187.5	245697	490.626
A10	18	159985	21344	58718.7	229273	470.69
A11	18	144428	20536.5	62188	266683	0
A12	18	145781	20243	53986.1	261445	1019.09
B1	18	140784	20742.8	51758.4	222517	21.7457
B2	18	159586	21850.3	66205.5	261641	141.055
B3	18	146681	21061.1	68892.2	251990	0
B4	18	154462	21574	69755.7	242238	82.1615
B5	18	144646	20319.3	76500.1	259325	0
B6	18	121779	16865.5	64433.3	217411	0
B7	18	126679	16856	64332.2	218049	0
B8	18	136552	18228.5	70159.2	242910	0
B9	18	124584	16623.4	61955.7	223438	528.684
B10	18	122554	18843.9	60609.5	229704	0
B11	18	143674	18730.2	61814.2	255349	0
B12	18	121709	17055.1	53459.9	238291	0
C1	18	64473.3	13874.2	49828.2	217349	90.18
C2	18	127450	19959.6	65807.2	254926	4136.42
C3	18	108414	18385.2	69650.4	250407	262.387
C4	18	119883	18977.2	72840.8	245318	358.812
C5	18	107618	17194.8	68243.5	226309	0
C6	18	102540	16271.5	63648.1	208116	0
C7	18	107906	16214.5	62433.2	205356	0
C8	18	112452	18077.6	71177.5	238155	0
C9	18	107360	16958.2	65709.1	225103	985.346
C10	18	123197	18345.6	68294.9	247890	46.6868
C11	18	121659	18023.5	65390.7	254208	721.51
C12	18	137704	19777.9	63470.5	281043	2028.37
D1	18	109322	17611.6	53701.8	223722	1505.49
D2	18	102991	16254.9	57373.8	223257	0
D3	18	124656	19740.7	66918.9	234153	880.238
D4	18	117565	18289.4	68765.8	233187	42.9231
D5	18	105625	16469.9	65683	215337	0
D6	18	106728	16111.8	63875	206361	0
D7	18	92214.8	14203	59884.5	194251	0
D8	18	110978	16983.7	70162.7	232191	0
D9	18	117568	17401.8	65868.7	227938	0
D10	18	101747	16217.3	62352.2	228315	0
D11	18	97388.8	14776.8	60957	248533	0
D12	18	135710	20356.8	71045.7	308528	232.145
E1	18	148369	27577.4	71566.8	273616	905.105
E2	18	156196	25255.3	68599.1	258141	618.802
E3	18	138925	23966.4	70763.2	250205	716.602
E4	18	132907	21132.3	74380.2	254051	0
E5	18	138051	21322.6	72719.2	234162	6436.46
E6	18	147191	22936.4	80549.9	257728	0
E7	18	154646	23833	84279.3	263359	165.412
E8	18	137036	22495.2	79066.9	257983	170.837
E9	18	139509	23248.9	76235.2	263762	0
E10	18	127617	20702.4	65078.7	238620	326.622
E11	18	141812	21675.8	64419.3	253847	38.2363
E12	18	122210	13017.4	51998.5	279146	1036.19
F1	18	141239	23816.9	67734.7	291064	0
F2	18	144901	24356.1	71766.3	280054	660.037
F3	18	154123	25069.8	72749.2	259642	0
F4	18	136846	23586.1	73739.8	248474	1524.54
F5	18	148753	23069	77126.4	255926	86.0126
F6	18	154423	25323.5	86512.7	286666	369.874
F7	18	145533	23044.4	81728.4	271107	0
F8	18	160347	25666.1	87675.6	294303	0
F9	18	146817	23980	79025.5	277737	0
F10	18	128083	20348.9	68338.1	254213	0
F11	18	114464	18067.1	54410.7	217474	0
F12	18	121242	20623.4	60958.9	273239	326.885
G1	18	170070	28659	63715.2	286566	0
G2	18	204608	29879.8	65977.5	267367	1500.97
G3	18	189110	27577.6	66604.2	253714	20.835
G4	18	146775	23173	73691.3	264572	425.732
G5	18	165168	24989	75172.7	261230	934.558
G6	18	166749	25761.9	83621.7	284897	609.643
G7	18	244861	33600.5	84282	289412	300.521
G8	18	258943	34598.3	86759.9	302731	0
G9	18	227747	30986.6	76878.7	278405	0
G10	18	192080	27316.4	72485	279296	264.534
G11	18	212115	30118.7	69987.2	292148	0
G12	18	167342	23913.3	53328.9	240935	1074.19
H1	18	210909	31566	57446.3	265417	1560.34
H2	18	211483	31343.2	64553.2	278481	780.748
H3	18	200754	29655.1	69199.2	279265	0
H4	18	180718	26521.4	73764.7	281415	573.635
H5	18	198262	27420.8	71710.5	263815	0
H6	18	199840	29225.7	84735.2	308707	600.281
H7	18	185907	26356	69560	268519	0
H8	18	201326	29757.3	79932.5	294828	727.011
H9	18	184711	27309.4	75682.3	294041	0
H10	18	190139	33021.6	76228.7	305897	342.396
H11	18	159260	25092.8	72949.6	324768	530.488
H12	18	193925	31759.7	70686	313852	6325.95
A1	19	170020	25272.3	55642.8	257115	1111.21
A2	19	178756	25845.5	56859.9	235111	765.737
A3	19	142834	20088.9	59347	229774	211.006
A4	19	139299	20091	63080	233110	195.367
A5	19	149505	20382.1	62125.3	222571	856.686
A6	19	109129	16257.2	60406	214765	0
A7	19	127640	17668.8	64521.2	224498	558.363
A8	19	138054	18295.7	63365.9	228153	806.418
A9	19	136923	19131.4	65333	245587	84.1363
A10	19	181665	23630.2	58801.4	229565	134.057
A11	19	145903	20603.9	62186.8	266412	112.672
A12	19	147127	20569.4	53664.7	261622	885.703
B1	19	146170	21080.2	51604.1	222894	193.64
B2	19	159512	21870.6	66114.2	261508	39.6352
B3	19	150726	21697.7	68901.4	252147	46.8261
B4	19	166825	22306.8	69958	242362	269.814
B5	19	145466	20404.5	76960.4	259523	0
B6	19	122995	17167.5	64278.9	216995	0
B7	19	130460	17335.4	64290	217913	0
B8	19	139696	18265.5	70350.6	243585	0
B9	19	127893	17120	62255.2	223586	449.98
B10	19	124082	18793.8	61012.5	230045	138.771
B11	19	149074	19470.4	61856.7	255752	0
B12	19	122686	17042.1	53402.1	238843	0
C1	19	65183.7	13658.6	50054.5	216938	298.975
C2	19	131289	20527.4	65881.6	255128	4241.24
C3	19	109428	18528.3	70018.7	250905	356.305
C4	19	123537	19360.8	73070.1	245878	408.099
C5	19	108343	17555.6	68225.7	226571	407.488
C6	19	104735	16432.2	63560.3	207840	0
C7	19	115591	16644.6	62389.9	205764	0
C8	19	113468	17819.8	71406.1	238644	0
C9	19	110189	16924.9	65714.6	225941	1062.54
C10	19	124230	18686.8	68174.5	247597	143.951
C11	19	121993	18441.1	65409.2	253001	540.855
C12	19	142012	20468.6	64157.5	281464	1573.78
D1	19	113033	18097.5	53973.5	223486	1558.17
D2	19	104365	16419.4	57539.2	223466	0
D3	19	125675	19890.8	66616.8	234131	756.067
D4	19	121535	18624.8	69140.3	233367	314.119
D5	19	106777	16685.2	66063.9	216218	0
D6	19	110154	16474.5	63766.1	206481	0
D7	19	97407.8	14318.5	60119.7	194838	0
D8	19	112457	17125.3	70004.2	233374	0
D9	19	129723	18554.4	65852.2	227915	0
D10	19	104950	15980.7	62410.1	228269	0
D11	19	97159.2	14912.6	61197.5	248489	0
D12	19	138211	20232.8	71001.5	308256	356.096
E1	19	149370	27304.3	71776	273587	560.348
E2	19	157293	25281.8	68839.3	258586	615.601
E3	19	139335	23979	70780.7	251622	1152.33
E4	19	132084	21258.1	74612.9	253618	167.571
E5	19	139183	21499.1	72832.5	234608	6205.89
E6	19	148309	22821.8	80606.2	258353	255.396
E7	19	155090	24069.7	84154.6	263416	0
E8	19	136600	22559	78925.8	258222	0
E9	19	139479	22861.3	76204.9	264623	0
E10	19	128887	20701.5	65018.9	238878	295.658
E11	19	141612	21756.1	64758.6	254152	0
E12	19	123338	12722	51806.7	279559	804.547
F1	19	140720	24312.4	67868.3	291531	0
F2	19	144928	24476.3	71605.3	280061	639.693
F3	19	154962	25333.7	72810.2	259956	273.482
F4	19	138864	23671.3	73586.3	248357	1818.1
F5	19	150332	23114.5	77092.4	255963	0
F6	19	154802	25232.8	86772.6	287102	509.26
F7	19	145325	23289.1	81825.9	271539	0
F8	19	161433	25882.6	87803.7	294682	0
F9	19	148127	23972.5	79221.4	278100	0
F10	19	127514	20808.9	68157.4	254813	0
F11	19	113332	18198.8	54431.4	216636	0
F12	19	120554	20636.4	60885	273832	0
G1	19	212503	33562.8	64067.2	286487	0
G2	19	252564	35153.4	66448.3	268364	1076.45
G3	19	234786	32076.3	66816.7	253097	231.079
G4	19	157581	24310.2	73808.1	264919	0
G5	19	185445	26567.3	75449.4	261004	1143.95
G6	19	182836	27221.1	83587.4	285024	106.779
G7	19	313229	39820.2	84784.5	289792	0
G8	19	334322	41286.7	86923.1	303661	0
G9	19	290685	36527.1	77195.7	278199	0
G10	19	234602	31583.4	72500	279596	71.4669
G11	19	265350	36185.9	70185.1	291398	0
G12	19	202520	27966.5	53579.8	241051	1193.25
H1	19	274067	38908.6	57311.3	265764	1686.58
H2	19	279923	39098.5	64716.6	278062	613.206
H3	19	263820	36259	69299	279294	0
H4	19	215633	30202.8	73934.8	280916	745.725
H5	19	249240	32611.2	72029.1	263209	0
H6	19	236519	32714.3	84618.1	308587	381.911
H7	19	217740	29307.2	69887.1	267975	0
H8	19	234806	33257.8	80259.1	295061	493.393
H9	19	218712	30561.5	75598	293719	0
H10	19	206425	35355.9	76258.3	306766	777.969
H11	19	165212	26240.1	73039.3	326182	861.344
H12	19	199263	32576.8	70428.9	314119	5902.19
A1	20	190063	27342.8	55715.1	256693	764.606
A2	20	217495	30252.2	57107.1	235203	1209.84
A3	20	154930	21621.7	59425.3	230079	388.172
A4	20	148880	21050.6	62926.8	232932	0
A5	20	177204	23221	61904.3	222625	1069.31
A6	20	114062	16617.5	60395.1	214915	0
A7	20	132899	18213.8	64594.5	224975	414.216
A8	20	143474	18609	63731.6	228740	667.048
A9	20	140362	19129.5	65320.1	245477	166.245
A10	20	219598	27514.1	59191.2	228602	239.317
A11	20	147557	21459.9	62166.6	266555	0
A12	20	149207	20818.5	53993.7	261995	614.923
B1	20	158875	22921.3	52193.6	222208	168.788
B2	20	161298	21814.4	66355.7	261707	120.071
B3	20	161295	22880.8	68890.1	252529	254.942
B4	20	187337	24548.5	70320.2	242496	304.302
B5	20	148436	20429.2	77325.2	260013	0
B6	20	126284	17162.4	64230.6	216921	0
B7	20	139117	17976.9	64364.9	218221	0
B8	20	144877	18735.1	70539.3	243651	0
B9	20	133461	17756	62086	223724	355.022
B10	20	125043	18726.3	60872.6	230223	0
B11	20	156263	20423.3	61989.6	255919	0
B12	20	124446	17453.3	53239	238072	0
C1	20	66751.2	13902.6	49725.3	217158	100.742
C2	20	135860	21435	65944.9	255067	4186.82
C3	20	112497	19047.9	70028.4	251500	672.912
C4	20	129885	19820.5	73095.8	246402	79.8455
C5	20	109966	17551.1	68291.2	227008	173.837
C6	20	108862	16653.9	63607.4	208222	0
C7	20	128980	17749.9	62704.8	205623	0
C8	20	114493	18034.1	71492.2	238645	178.77
C9	20	113821	17385.6	65840.6	226212	1274.14
C10	20	125636	18837.1	68091.6	248073	378.357
C11	20	122920	18165.2	65490.8	253656	646.145
C12	20	150957	21197.4	63902.4	281129	1669.49
D1	20	119828	18986.4	53754.9	223548	1488.7
D2	20	106667	16771.4	57669	223353	150.391
D3	20	126724	19707.8	66813.9	234308	1159.85
D4	20	126759	19310	69058	233571	93.6505
D5	20	110741	16713.4	66041.6	216102	0
D6	20	116687	16970.3	63865.1	206829	0
D7	20	108887	15405.4	60039.6	194586	0
D8	20	114908	17241.6	70271.6	232800	0
D9	20	153915	20353.3	65846.4	228616	0
D10	20	111080	16512.9	62486.9	229046	0
D11	20	100827	15167.9	61061.1	249384	0
D12	20	143054	20639.6	71062.2	308489	600.846
E1	20	149404	27339.8	71610	274443	938.346
E2	20	157701	25191.5	68217.9	258916	945.273
E3	20	139324	24139	70961.5	251206	888.779
E4	20	133863	21120.2	74886.7	254445	148.275
E5	20	140804	21483.7	72865.3	234920	6222.57
E6	20	150615	23062.7	80751.1	258265	0
E7	20	155567	24045.8	84498.2	263442	213.933
E8	20	137881	22529.7	78873.4	257979	72.6056
E9	20	140841	23064.8	76344.5	263575	0
E10	20	129387	20765.7	65381.1	239454	369.572
E11	20	141410	21788.3	64405.7	253803	160.38
E12	20	123677	12682.6	52100.9	279102	607.223
F1	20	141740	24610.5	67419.8	291277	0
F2	20	145192	24392.3	72159.8	280874	632.912
F3	20	155688	25192.9	73140.6	260112	507.202
F4	20	139806	23846.6	73867.2	248264	1577.38
F5	20	153014	23143	77585.1	256489	270.462
F6	20	156100	25389	86992.8	287228	226.844
F7	20	146140	23094.6	82051.1	271544	0
F8	20	165253	26127.4	87951.3	294487	0
F9	20	148975	24038.4	79207.2	278023	0
F10	20	126957	20525.7	68181.4	255517	0
F11	20	114650	18154.6	54339.4	217211	0
F12	20	120493	20700.2	60715.2	274100	0
G1	20	282707	41836.8	63990.8	286852	0
G2	20	328295	42828.9	66321.4	267923	996.314
G3	20	309023	39113.6	67059.8	254022	0
G4	20	179498	26362.1	74002.3	265024	0
G5	20	221817	30276.2	75184.8	260904	620.924
G6	20	214144	29761.9	83783.9	285922	468.184
G7	20	414147	48000.9	84924.4	289830	0
G8	20	439942	49711.1	87179.1	303023	0
G9	20	388952	45101.1	76764.5	279198	0
G10	20	310393	38748.6	72609.3	279869	0
G11	20	355200	45436.6	70049.7	292392	0
G12	20	264463	35427.5	53554.6	240000	530.479
H1	20	371509	51449.4	57496.6	264952	1470.97
H2	20	382306	51150	64956.6	278605	712.614
H3	20	365045	46981.5	69437.1	279116	0
H4	20	280905	36537.2	73952.6	281060	589.114
H5	20	334412	40487.4	72210	263262	0
H6	20	304493	39261.8	84903.7	309493	931.144
H7	20	274184	34527.4	70226.5	268494	0
H8	20	296269	38507.1	80280.2	295076	691.833
H9	20	280189	36099.4	76056.9	294118	0
H10	20	238093	38976.4	76037.6	306320	687.037
H11	20	175586	27305.9	72928.9	325096	573.764
H12	20	210006	32672.7	71167.3	313107	5920.76
A1	21	220078	32003.4	55610.3	257086	836.009
A2	21	279099	38247.1	57382.1	235340	837.847
A3	21	177825	23743.6	59448.8	230718	538.464
A4	21	170418	23028.1	63024.5	233073	376.369
A5	21	221185	28013.6	62346.3	222689	956.795
A6	21	121807	17479.1	60626.1	214569	0
A7	21	140354	19092.6	64553.3	225170	472.206
A8	21	153134	20006.3	63695.4	228280	930.01
A9	21	145951	19803.8	65511.1	245564	346.682
A10	21	281887	35004	59018.1	229457	0
A11	21	150836	21431.3	62231.9	266804	0
A12	21	152071	20958	53663.5	261302	984.411
B1	21	181736	25473.1	51798.6	223085	243.345
B2	21	161965	22225.8	66472.4	261702	214.496
B3	21	180337	24881.9	69265.2	251960	40.5826
B4	21	224660	28489.6	70337.4	243113	42.6023
B5	21	151944	20949.5	77325.2	260032	0
B6	21	132070	17719.7	64318.3	217306	0
B7	21	155465	19534	64506.1	217921	0
B8	21	154443	19863.9	70368.5	243600	0
B9	21	144472	18980.6	62096.2	223191	495.32
B10	21	129306	19477.5	60956.5	230347	248.078
B11	21	172993	21829.7	62217.2	255834	0
B12	21	127961	17572.6	53479.2	238895	0
C1	21	70973.5	14429.4	50061	216913	348.533
C2	21	147137	22659.7	66082.6	255128	4598.04
C3	21	119087	19466.6	69839.9	250482	508.315
C4	21	142982	20796.4	73089.9	245963	375.57
C5	21	112130	17680.1	68467	226842	239.259
C6	21	116489	17497.8	63796	208955	0
C7	21	153915	19732.5	62654.2	205783	0
C8	21	117652	18444.3	71590.8	238515	0
C9	21	122349	18047.2	66068.2	226329	1007.14
C10	21	128598	19103.1	68265	248018	241.215
C11	21	123672	18262.9	65467.9	252962	58.7404
C12	21	164703	22854.5	63856.3	281584	1331.87
D1	21	132595	20063.5	53726.4	223817	1628.41
D2	21	111130	17355.1	57535.7	223291	0
D3	21	129394	20219.3	66955.8	234470	960.26
D4	21	138874	20515.2	68957.9	233996	335.581
D5	21	117240	17193.9	65762.1	216647	0
D6	21	130189	17889.6	64015.5	207603	0
D7	21	127187	16844.6	59929.5	194790	0
D8	21	120407	18048.4	70336.9	232533	0
D9	21	195075	24016.9	66159.8	228098	0
D10	21	122582	17542.3	62893.8	228598	0
D11	21	103763	15296.5	61165.2	248983	0
D12	21	149878	21280.7	71318	308413	585.09
E1	21	150553	27535.7	71648.3	274900	822.477
E2	21	158094	25211.3	68749.9	258864	629.471
E3	21	140570	24113.9	70875	251221	995.548
E4	21	134472	21234.9	74487.3	255275	141.166
E5	21	144764	21963	73039.3	234978	6407.03
E6	21	153325	23329.9	81092	258577	0
E7	21	156097	23945.9	84720.6	263691	0
E8	21	139559	22624.8	79318.2	259062	0
E9	21	142081	22728.2	76499.3	263814	0
E10	21	131789	20867.5	65126.6	239307	0
E11	21	142217	21595.4	64647.9	253765	0
E12	21	123262	13003.6	51934.6	279448	794.061
F1	21	142432	24614.4	68119.5	291627	0
F2	21	145720	24237.1	71709.6	280972	689.422
F3	21	156262	25044.2	72988.2	260774	386.947
F4	21	143951	24021.9	73888.3	248626	1187.93
F5	21	158079	23527.2	77589	256387	282.886
F6	21	159402	25608.8	87032.6	287457	520.192
F7	21	146469	23017.8	81715.7	272035	0
F8	21	171147	26441.7	88068.7	294702	167.613
F9	21	151886	23688.5	79579.3	278839	0
F10	21	128554	20307.7	68107.3	256154	0
F11	21	114710	17976.5	54423.1	217597	0
F12	21	121603	20482.7	60922.5	274192	0
G1	21	372094	52121	64214.7	287088	0
[truncated: 10,775 more rows]

## Sheet: Multicomponent Data
Block Type	96fast
Chemistry	SYBR_GREEN
Experiment File Name	S:\LQW\ZHB\2014-4-4.eds
Experiment Run End Time	2012-05-24 01:58:16 AM CST
Instrument Type	sds7500fast
Passive Reference	ROX
Well	Cycle	SYBR	ROX
A1	1	151791	297433
A2	1	132439	277974
A3	1	127047	264938
A4	1	128887	292812
A5	1	121647	265250
A6	1	106332	231196
A7	1	124175	240676
A8	1	134231	260063
A9	1	134440	249474
A10	1	136150	271574
A11	1	141087	273203
A12	1	140531	262892
B1	1	131564	252077
B2	1	153445	261349
B3	1	138403	289315
B4	1	142950	273638
B5	1	139596	265097
B6	1	116192	220797
B7	1	124183	238798
B8	1	136888	269054
B9	1	122998	243364
B10	1	121307	234352
B11	1	140799	257665
B12	1	120273	244926
C1	1	59657.2	230059
C2	1	119397	280900
C3	1	103608	294504
C4	1	116638	282293
C5	1	104260	240816
C6	1	99665	227798
C7	1	98058.1	233990
C8	1	111889	260089
C9	1	101840	225216
C10	1	117644	282745
C11	1	118193	272881
C12	1	133052	302547
D1	1	103492	245658
D2	1	95694.9	225237
D3	1	118422	238344
D4	1	111171	238328
D5	1	98817.9	219508
D6	1	99024	213342
D7	1	85972	202148
D8	1	111244	258053
D9	1	103058	236826
D10	1	99608.4	239575
D11	1	97341.8	252288
D12	1	138946	338765
E1	1	147140	295015
E2	1	153740	275986
E3	1	131926	269150
E4	1	131885	258206
E5	1	136223	254293
E6	1	147254	276409
E7	1	156677	290915
E8	1	137132	270485
E9	1	141286	285061
E10	1	122797	247564
E11	1	137217	255056
E12	1	120106	285578
F1	1	140818	296534
F2	1	142072	285647
F3	1	152855	281632
F4	1	134155	253062
F5	1	146151	258400
F6	1	152166	295188
F7	1	148054	289244
F8	1	159934	306098
F9	1	143805	286230
F10	1	129896	263712
F11	1	115385	220409
F12	1	124473	277476
G1	1	115966	299643
G2	1	142626	281368
G3	1	129077	270043
G4	1	133461	281620
G5	1	141799	273612
G6	1	146871	291384
G7	1	154362	302966
G8	1	163444	308456
G9	1	149497	284149
G10	1	143804	285198
G11	1	148363	298334
G12	1	129601	244592
H1	1	131980	268396
H2	1	129034	281544
H3	1	121852	281644
H4	1	139269	287071
H5	1	138230	269199
H6	1	157871	313248
H7	1	150044	273475
H8	1	157673	300661
H9	1	146387	300192
H10	1	156341	307569
H11	1	155973	335307
H12	1	196654	318935
A1	2	152788	293365
A2	2	134489	274459
A3	2	129896	263076
A4	2	130558	288541
A5	2	123754	262424
A6	2	107618	228249
A7	2	125087	236433
A8	2	136648	258307
A9	2	135728	250664
A10	2	139541	266232
A11	2	143265	272068
A12	2	144927	263947
B1	2	133524	250347
B2	2	158936	262571
B3	2	142315	283033
B4	2	146094	272022
B5	2	142305	264988
B6	2	119129	222342
B7	2	126663	236040
B8	2	139561	267666
B9	2	124363	241093
B10	2	123767	232938
B11	2	144192	261477
B12	2	120814	241944
C1	2	60623.4	227062
C2	2	121130	279890
C3	2	105333	289941
C4	2	118977	278812
C5	2	105613	237755
C6	2	101931	220296
C7	2	99108.3	228665
C8	2	112203	258590
C9	2	104297	227614
C10	2	120740	278692
C11	2	120320	268249
C12	2	133233	300022
D1	2	105087	243112
D2	2	99097.9	226094
D3	2	121402	238543
D4	2	112482	237986
D5	2	101559	221177
D6	2	101967	212232
D7	2	87067.2	200033
D8	2	112362	256810
D9	2	103824	231862
D10	2	100269	232405
D11	2	98305.6	252917
D12	2	139769	337214
E1	2	148303	291621
E2	2	156864	272379
E3	2	136148	266606
E4	2	134982	260714
E5	2	139062	252883
E6	2	148952	274592
E7	2	159926	291105
E8	2	139125	269579
E9	2	143344	283359
E10	2	126479	241502
E11	2	140505	256778
E12	2	121770	279900
F1	2	142613	295644
F2	2	145318	286463
F3	2	155238	278157
F4	2	136780	253217
F5	2	149180	260480
F6	2	154462	293461
F7	2	149177	288253
F8	2	161201	301352
F9	2	146245	282787
F10	2	131362	258417
F11	2	117926	222070
F12	2	125799	276414
G1	2	119899	292396
G2	2	145919	276368
G3	2	133242	266000
G4	2	136597	278094
G5	2	144672	268931
G6	2	150886	291057
G7	2	159061	298511
G8	2	168120	307836
G9	2	151345	281910
G10	2	145584	282740
G11	2	151167	296019
G12	2	129517	245433
H1	2	133614	267909
H2	2	131212	281746
H3	2	123546	281967
H4	2	141732	287278
H5	2	139662	268097
H6	2	161147	314522
H7	2	153650	274565
H8	2	161746	301312
H9	2	149156	299452
H10	2	158477	309596
H11	2	159245	329781
H12	2	196771	317002
A1	3	154595	288220
A2	3	136902	270090
A3	3	132120	260900
A4	3	133377	278952
A5	3	124903	260250
A6	3	107780	222789
A7	3	126788	233500
A8	3	136322	254761
A9	3	136199	248936
A10	3	141891	263647
A11	3	144815	269887
A12	3	144326	260709
B1	3	134902	246312
B2	3	158642	260104
B3	3	143106	278466
B4	3	146992	268667
B5	3	143396	264101
B6	3	119650	220249
B7	3	126406	233252
B8	3	140273	265014
B9	3	126334	238955
B10	3	123903	231823
B11	3	143549	258695
B12	3	121377	240220
C1	3	61084.9	221318
C2	3	123038	279868
C3	3	106525	285797
C4	3	118635	275631
C5	3	106838	235053
C6	3	100962	212637
C7	3	100503	223816
C8	3	112979	254801
C9	3	104473	226632
C10	3	120664	275821
C11	3	121134	260742
C12	3	135714	296853
D1	3	105135	237259
D2	3	98732.3	224980
D3	3	121875	237063
D4	3	113510	237004
D5	3	101397	219734
D6	3	101508	211470
D7	3	86871.4	197934
D8	3	112084	253747
D9	3	104680	230828
D10	3	100700	231533
D11	3	98597.7	251519
D12	3	139568	329122
E1	3	149623	284765
E2	3	157511	264141
E3	3	138415	259430
E4	3	134938	257942
E5	3	139735	250698
E6	3	149872	267883
E7	3	159799	287380
E8	3	138475	263614
E9	3	143730	280522
E10	3	126116	240906
E11	3	140870	255694
E12	3	120847	276796
F1	3	142886	294264
F2	3	145161	283951
F3	3	156839	273485
F4	3	137745	252237
F5	3	149795	259905
F6	3	153786	291277
F7	3	150002	284883
F8	3	162793	299246
F9	3	147799	281705
F10	3	131086	256999
F11	3	117838	220768
F12	3	124748	274700
G1	3	119798	288401
G2	3	147047	271450
G3	3	134002	260434
G4	3	136416	272596
G5	3	145646	266613
G6	3	149691	289885
G7	3	159376	294955
G8	3	168027	306920
G9	3	152799	281010
G10	3	145508	281888
G11	3	150946	294261
G12	3	129061	243513
H1	3	132707	265792
H2	3	130566	276208
H3	3	123917	281442
H4	3	142312	284774
H5	3	139394	265668
H6	3	161469	311638
H7	3	152633	271823
H8	3	162156	298602
H9	3	148361	296857
H10	3	160338	308471
H11	3	159666	327223
H12	3	195741	313872
A1	4	156116	284115
A2	4	138176	265391
A3	4	134206	259320
A4	4	134959	274244
A5	4	126579	257760
A6	4	106485	217969
A7	4	124708	227636
A8	4	136761	250951
A9	4	135587	247267
A10	4	141400	259345
A11	4	143822	268369
A12	4	144585	260560
B1	4	135095	242459
B2	4	157220	259115
B3	4	144280	272716
B4	4	148474	264406
B5	4	142999	262945
B6	4	118822	219514
B7	4	126191	230819
B8	4	140696	260756
B9	4	126225	235500
B10	4	124377	231714
B11	4	142594	257192
B12	4	121006	240411
C1	4	61301.5	219580
C2	4	123384	278046
C3	4	106316	281170
C4	4	118460	271700
C5	4	106310	231461
C6	4	99651.4	211394
C7	4	101073	219652
C8	4	112459	250291
C9	4	104049	226560
C10	4	121779	271291
C11	4	121159	258163
C12	4	133902	292555
D1	4	106091	232011
D2	4	99645.3	224613
D3	4	122308	236463
D4	4	113527	236467
D5	4	102054	219090
D6	4	101914	210240
D7	4	86942.4	197678
D8	4	112620	250299
D9	4	103958	230731
D10	4	100666	230489
D11	4	98651.3	251353
D12	4	138895	322211
E1	4	148731	277780
E2	4	157301	261067
E3	4	137685	255069
E4	4	133713	257442
E5	4	140032	248389
E6	4	148406	263811
E7	4	159896	282112
E8	4	138393	262869
E9	4	143770	277119
E10	4	126622	241278
E11	4	140412	255812
E12	4	120419	274981
F1	4	141504	292368
F2	4	145057	282649
F3	4	155762	265728
F4	4	136455	251938
F5	4	148646	259832
F6	4	153743	291278
F7	4	148607	278762
F8	4	162123	298302
F9	4	147922	281405
F10	4	130295	257194
F11	4	117210	219450
F12	4	124198	275121
G1	4	120628	287428
G2	4	147264	269819
G3	4	133382	256101
G4	4	135856	268073
G5	4	144471	265733
G6	4	149728	289648
G7	4	158970	294175
G8	4	167954	306721
G9	4	152681	280750
G10	4	145684	281580
G11	4	150142	293322
G12	4	129687	242422
H1	4	133797	265523
H2	4	132350	277499
H3	4	124502	280714
H4	4	141017	283854
H5	4	139513	265598
H6	4	160769	311726
H7	4	153086	271114
H8	4	162150	297961
H9	4	148352	296207
H10	4	161260	308808
H11	4	157863	327152
H12	4	194862	315075
A1	5	155762	280437
A2	5	138179	261003
A3	5	135242	255995
A4	5	135334	269703
A5	5	126528	253882
A6	5	105497	216982
A7	5	124007	226987
A8	5	137247	247009
A9	5	134497	247604
A10	5	142224	254532
A11	5	144449	267638
A12	5	144444	259327
B1	5	135432	238652
B2	5	156952	259705
B3	5	145035	269637
B4	5	148343	260119
B5	5	143271	263045
B6	5	119527	219353
B7	5	127455	228548
B8	5	139923	258049
B9	5	126663	232987
B10	5	123445	231564
B11	5	143341	257242
B12	5	120439	240650
C1	5	61278.2	218745
C2	5	124305	274673
C3	5	106657	277458
C4	5	120253	267889
C5	5	107084	231256
C6	5	101654	212004
C7	5	102233	217844
C8	5	112576	243188
C9	5	104174	226086
C10	5	122288	266777
C11	5	120631	257408
C12	5	133514	284998
D1	5	105178	225408
D2	5	100351	224988
D3	5	122899	235990
D4	5	114619	236876
D5	5	102248	218869
D6	5	101947	210590
D7	5	86900.8	197901
D8	5	112932	247519
D9	5	104083	230180
D10	5	100004	230242
D11	5	98330.6	250793
D12	5	137397	312294
E1	5	148282	278246
E2	5	156264	261595
E3	5	137661	254189
E4	5	133718	257255
E5	5	138395	240036
E6	5	147556	262863
E7	5	159795	279460
E8	5	137642	263016
E9	5	142311	270234
E10	5	126151	241048
E11	5	141005	255809
E12	5	120631	274503
F1	5	142510	292709
F2	5	145626	282805
F3	5	153960	262813
F4	5	136325	251985
F5	5	148874	259186
F6	5	154013	291236
F7	5	147069	277110
F8	5	161039	298576
F9	5	147688	281546
F10	5	130281	257364
F11	5	117230	218821
F12	5	124617	274782
G1	5	120350	287589
G2	5	147095	269960
G3	5	134287	256148
G4	5	135031	268081
G5	5	144335	265296
G6	5	149345	289638
G7	5	159908	293948
G8	5	167088	307203
G9	5	152978	281272
G10	5	145011	281088
G11	5	151146	293745
G12	5	128881	243212
H1	5	131866	266332
H2	5	131825	278809
H3	5	124358	280277
H4	5	140529	284194
H5	5	138548	265346
H6	5	159713	311507
H7	5	153170	271400
H8	5	162462	298039
H9	5	148846	296082
H10	5	162983	309028
H11	5	158241	326848
H12	5	193302	313700
A1	6	156425	275082
A2	6	139350	256058
A3	6	135194	251904
A4	6	136983	265523
A5	6	127041	250392
A6	6	105378	216731
A7	6	123619	226673
A8	6	137461	243200
A9	6	133909	246965
A10	6	141817	250921
A11	6	144815	267725
A12	6	143240	259915
B1	6	135618	234626
B2	6	157191	260239
B3	6	145617	265350
B4	6	147873	256796
B5	6	142618	263575
B6	6	120235	219876
B7	6	124883	222755
B8	6	139178	254518
B9	6	123178	225098
B10	6	123261	231682
B11	6	142272	257715
B12	6	121336	240460
C1	6	62588.9	218809
C2	6	124559	269912
C3	6	106917	272375
C4	6	119074	263745
C5	6	106407	230427
C6	6	101734	211774
C7	6	100912	213205
C8	6	112399	242892
C9	6	104583	227129
C10	6	123142	262357
C11	6	120904	256944
C12	6	133004	284079
D1	6	105283	225130
D2	6	100012	225712
D3	6	123280	236404
D4	6	113361	236528
D5	6	103243	219264
D6	6	102822	210382
D7	6	86858.1	197677
D8	6	112026	244113
D9	6	104017	231199
D10	6	99807.5	230544
D11	6	98286.4	251018
D12	6	136593	312817
E1	6	148381	276970
E2	6	156434	260981
E3	6	137327	253497
E4	6	133216	256631
E5	6	137822	239207
E6	6	148310	263222
E7	6	157385	270418
E8	6	137465	262099
E9	6	142139	268897
E10	6	126464	241677
E11	6	140701	255188
E12	6	121530	277692
F1	6	142325	293176
F2	6	145133	282128
F3	6	154250	262739
F4	6	136296	251978
F5	6	148466	260560
F6	6	154132	291010
F7	6	146883	276312
F8	6	161166	298468
F9	6	147864	281536
F10	6	130153	257619
F11	6	115151	218414
F12	6	123654	274442
G1	6	120658	287459
G2	6	146886	270028
G3	6	133893	256292
G4	6	135028	267879
G5	6	144749	265478
G6	6	150296	289538
G7	6	160366	294483
G8	6	168001	307647
G9	6	152884	281793
G10	6	144799	281739
G11	6	150422	293739
G12	6	127702	242354
H1	6	134417	265657
H2	6	129487	278724
H3	6	124668	280715
H4	6	141902	284139
H5	6	139574	265685
H6	6	160268	311441
H7	6	152631	271407
H8	6	163537	298309
H9	6	148291	295668
H10	6	164430	308068
H11	6	157239	327190
H12	6	194018	314595
A1	7	156664	271574
A2	7	138494	251092
A3	7	135483	246889
A4	7	136220	260884
A5	7	127725	246714
A6	7	105632	217017
A7	7	123143	226735
A8	7	136887	238400
A9	7	134237	247878
A10	7	143875	247277
A11	7	143628	268482
A12	7	143769	259719
B1	7	137392	231620
B2	7	158730	262667
B3	7	141947	256156
B4	7	144744	247763
B5	7	143441	263932
B6	7	120319	219756
B7	7	123747	221870
B8	7	135923	247473
B9	7	122229	224655
B10	7	123832	231689
B11	7	141948	257093
B12	7	120722	240452
C1	7	62714.7	218651
C2	7	124711	263791
C3	7	106806	267855
C4	7	118863	258487
C5	7	107536	231584
C6	7	100625	211493
C7	7	100023	210181
C8	7	112359	242177
C9	7	105601	226821
C10	7	122580	254068
C11	7	121161	257380
C12	7	133859	284340
D1	7	105309	225568
D2	7	100641	225340
D3	7	122937	236753
D4	7	114237	236622
D5	7	103320	219720
D6	7	102458	210294
D7	7	87176.8	197391
D8	7	110410	238152
D9	7	104190	230863
D10	7	100020	229498
D11	7	98445.2	251062
D12	7	136062	311997
E1	7	148952	277727
E2	7	155864	260973
E3	7	137966	252944
E4	7	132721	256963
E5	7	137069	238910
E6	7	147396	262927
E7	7	155926	269405
E8	7	136907	262637
E9	7	140961	269162
E10	7	126107	241682
E11	7	141467	255717
E12	7	121738	278408
F1	7	142386	293788
F2	7	145632	282692
F3	7	153653	262717
F4	7	136993	252064
F5	7	148477	259776
F6	7	153576	290966
F7	7	147093	276143
F8	7	160277	298850
F9	7	148260	281911
F10	7	129674	257798
F11	7	116342	218200
F12	7	124175	275432
G1	7	120969	288513
G2	7	147233	269848
G3	7	134586	255997
G4	7	134990	267752
G5	7	144362	264582
G6	7	150066	289456
G7	7	159842	294173
G8	7	167615	307381
G9	7	151984	282210
G10	7	145779	281948
G11	7	151548	294476
G12	7	127237	242960
H1	7	133281	265285
H2	7	129854	278359
H3	7	124144	280634
H4	7	141527	284634
H5	7	139423	266243
H6	7	160857	311849
H7	7	152566	271490
H8	7	163371	298661
H9	7	148598	296063
H10	7	165031	309114
H11	7	157151	327272
H12	7	192948	315374
A1	8	153206	262033
A2	8	136918	245400
A3	8	135390	243709
A4	8	136645	257087
A5	8	127269	243009
A6	8	105716	216918
A7	8	122857	227256
A8	8	134453	232634
A9	8	134820	247311
A10	8	142019	243894
A11	8	143964	268192
A12	8	143669	259655
B1	8	134164	224677
B2	8	158013	263142
B3	8	141646	255439
B4	8	144746	246330
B5	8	143601	263461
B6	8	118930	219497
B7	8	123171	221481
B8	8	134470	246803
B9	8	121611	225038
B10	8	122624	231274
B11	8	142713	257151
B12	8	120916	241089
C1	8	62378	219285
C2	8	124060	259554
C3	8	107651	263057
C4	8	118170	251334
C5	8	107022	231513
C6	8	100678	211033
C7	8	99592	209626
C8	8	112226	242114
C9	8	104321	226773
C10	8	121627	251719
C11	8	121618	257348
C12	8	133169	284183
D1	8	104877	225482
D2	8	100835	225598
D3	8	123603	236816
D4	8	114649	236764
D5	8	102888	219289
D6	8	102324	210133
D7	8	86225.9	197878
D8	8	109929	236701
D9	8	103229	231032
D10	8	98811.1	230009
D11	8	97479.6	250633
D12	8	135444	311373
E1	8	149595	278301
E2	8	156603	261800
E3	8	138470	253740
E4	8	132983	257175
E5	8	137491	239299
E6	8	147864	263358
E7	8	155887	269249
E8	8	137786	262187
E9	8	140981	268394
E10	8	127168	241939
E11	8	140792	255532
E12	8	121524	278185
F1	8	141536	294218
F2	8	146536	282851
F3	8	153719	263167
F4	8	136373	252374
F5	8	148355	260242
F6	8	154013	291501
F7	8	146310	275870
F8	8	160002	298994
F9	8	147860	282175
F10	8	129694	257525
F11	8	115052	217986
F12	8	123628	275482
G1	8	120634	288115
G2	8	147086	270635
G3	8	133805	256666
G4	8	134550	267633
G5	8	144216	265102
G6	8	149145	289637
G7	8	160776	294669
G8	8	168301	307767
G9	8	154187	282065
G10	8	145436	282072
G11	8	151598	293887
G12	8	127549	242073
H1	8	135499	266600
H2	8	129182	279075
H3	8	124870	281378
H4	8	140968	284739
H5	8	139121	266147
H6	8	160409	312332
H7	8	153029	271295
H8	8	164136	298607
H9	8	149765	296406
H10	8	166282	309216
H11	8	156200	327844
H12	8	191741	314362
A1	9	151940	259997
A2	9	133562	238471
A3	9	133205	236142
A4	9	135995	252134
A5	9	127397	239436
A6	9	106053	217446
A7	9	123373	227307
A8	9	132768	231937
A9	9	134485	247474
A10	9	137304	236241
A11	9	144225	268272
A12	9	143825	259698
B1	9	133539	223513
B2	9	158723	264675
B3	9	140354	255034
B4	9	143510	246312
B5	9	143068	264067
B6	9	119978	220228
B7	9	122726	221761
B8	9	134586	246586
B9	9	122230	226540
B10	9	122966	232128
B11	9	141327	258124
B12	9	121822	241058
C1	9	62713.9	219125
C2	9	124089	258430
C3	9	105866	255789
C4	9	117190	250500
C5	9	107052	231630
C6	9	101053	210901
C7	9	100014	209030
C8	9	111984	241378
C9	9	104486	226749
C10	9	120980	251422
C11	9	120738	257670
C12	9	134314	283605
D1	9	105486	225476
D2	9	100886	226078
D3	9	123427	237584
D4	9	114391	237363
D5	9	103164	219767
D6	9	103366	210417
D7	9	86636.7	197600
D8	9	110051	236197
D9	9	103628	231521
D10	9	98873.7	230330
D11	9	98122.5	250989
D12	9	135099	311620
E1	9	149148	278576
E2	9	157043	261137
E3	9	137470	253734
E4	9	133419	256771
E5	9	137537	239010
E6	9	147799	262702
E7	9	156346	269076
E8	9	137408	262912
E9	9	140837	269305
E10	9	127035	241973
E11	9	141351	256119
E12	9	122193	279324
F1	9	143306	293963
F2	9	145533	283511
F3	9	154445	263090
F4	9	135823	251544
F5	9	148446	260439
F6	9	154307	291647
F7	9	145122	275648
F8	9	160515	298937
F9	9	146987	281852
F10	9	129228	258112
F11	9	115422	219154
F12	9	123468	274698
G1	9	120799	288705
G2	9	147505	270117
G3	9	134845	256757
G4	9	135165	267714
G5	9	143784	265214
G6	9	150238	289600
G7	9	160444	294536
G8	9	167720	307068
G9	9	153731	282080
G10	9	144933	281772
G11	9	151417	294281
G12	9	128817	243136
H1	9	134413	265857
H2	9	129585	279370
H3	9	124356	281165
H4	9	141564	284405
H5	9	140168	266079
H6	9	160071	312021
H7	9	152402	271797
H8	9	164409	299212
H9	9	148490	296570
H10	9	167428	309370
H11	9	156147	327265
H12	9	192241	315036
A1	10	151680	259456
A2	10	133313	237989
A3	10	129774	233180
A4	10	136338	247767
A5	10	125192	231528
A6	10	105608	217318
A7	10	123866	227413
A8	10	132445	231740
A9	10	134333	247846
A10	10	136483	233445
A11	10	143051	268188
A12	10	144937	262695
B1	10	133757	223582
B2	10	159420	264382
B3	10	140921	255074
B4	10	144630	245576
B5	10	143758	264193
B6	10	119389	220070
B7	10	122770	221259
B8	10	134474	245916
B9	10	122801	227368
B10	10	123239	232081
B11	10	141800	257737
B12	10	120350	241365
C1	10	63018	219167
C2	10	124489	258254
C3	10	107032	254259
C4	10	117526	249837
C5	10	107006	231391
C6	10	100469	211227
C7	10	99710.7	208719
C8	10	112037	241857
C9	10	104700	226739
C10	10	121439	250780
C11	10	121022	257419
C12	10	133745	284859
D1	10	106037	225991
D2	10	101110	226853
D3	10	123728	237636
D4	10	114672	236658
D5	10	103468	219870
D6	10	102421	210369
D7	10	86954	197863
D8	10	110280	236535
D9	10	104242	231137
D10	10	99355.1	230468
D11	10	97870.1	251355
D12	10	135863	311210
E1	10	149648	278538
E2	10	157475	261730
E3	10	138790	253318
E4	10	133262	257949
E5	10	136819	239506
E6	10	147255	263236
E7	10	156256	268941
E8	10	136583	263111
E9	10	141178	269153
E10	10	127500	242291
E11	10	141557	256809
E12	10	121200	279737
F1	10	142266	293593
F2	10	146438	283316
F3	10	153727	263231
F4	10	136830	252134
F5	10	148065	260165
F6	10	153397	291818
F7	10	145694	276069
F8	10	160028	299402
F9	10	147011	282344
F10	10	130172	258088
F11	10	115362	218669
F12	10	122959	275423
G1	10	121517	288787
G2	10	148798	270632
G3	10	134935	256729
G4	10	135152	268465
G5	10	145340	264962
G6	10	150279	289837
G7	10	160960	294306
G8	10	168090	307888
G9	10	154210	282414
G10	10	145371	281692
G11	10	151728	295488
G12	10	127695	242099
H1	10	132945	266672
H2	10	130389	280024
H3	10	125351	281435
H4	10	141349	284797
H5	10	139962	266762
H6	10	160761	312857
H7	10	153137	272717
H8	10	163762	299742
H9	10	149489	297405
H10	10	168087	310258
H11	10	156682	328378
H12	10	191350	315430
A1	11	152628	259505
A2	11	132779	238348
A3	11	130393	232976
A4	11	132148	240352
A5	11	122595	227893
A6	11	105849	217123
A7	11	123362	227623
A8	11	132995	231464
A9	11	133927	248310
A10	11	136493	233325
A11	11	144050	268067
A12	11	144970	262497
B1	11	134242	224283
B2	11	158441	264536
B3	11	141035	255601
B4	11	144374	246200
B5	11	143785	265005
B6	11	120402	220349
B7	11	123103	221318
B8	11	133897	246270
B9	11	121923	226758
B10	11	123835	232729
B11	11	141031	257494
B12	11	119756	241983
C1	11	62741	219629
C2	11	124358	258345
C3	11	105797	255323
C4	11	118147	249703
C5	11	107072	231311
C6	11	101289	211801
C7	11	100212	208891
C8	11	112271	241985
C9	11	104740	227220
C10	11	121849	250871
C11	11	121452	257373
C12	11	133852	284176
D1	11	105439	226542
D2	11	100723	226011
D3	11	123698	237692
D4	11	115164	236906
D5	11	103460	220187
D6	11	102341	210033
D7	11	87107.5	197798
D8	11	109565	235961
D9	11	104359	230989
D10	11	98928.5	231519
D11	11	97787.8	251911
D12	11	135503	311173
E1	11	149108	278120
E2	11	157448	262061
E3	11	138577	253965
E4	11	132420	257804
E5	11	137185	238949
E6	11	147166	262686
E7	11	155337	269008
E8	11	137361	262432
E9	11	141592	269161
E10	11	127516	242563
E11	11	141156	256766
E12	11	120946	279464
F1	11	142553	294897
F2	11	145119	282978
F3	11	153560	263567
F4	11	136409	252024
F5	11	149280	260005
F6	11	154115	292161
F7	11	146557	275731
F8	11	160259	298567
F9	11	147093	281549
F10	11	129036	258526
F11	11	114700	218816
F12	11	123296	275760
G1	11	120974	287522
G2	11	148707	270728
G3	11	135418	257034
G4	11	134632	268338
G5	11	144816	264267
G6	11	150222	290291
G7	11	161349	294214
G8	11	168432	308327
G9	11	155135	282523
G10	11	145868	281959
G11	11	151512	295258
G12	11	127475	242458
H1	11	134001	266560
H2	11	130579	280059
H3	11	125681	281759
H4	11	142053	284858
H5	11	139676	266541
H6	11	160598	313240
H7	11	152831	272230
H8	11	165014	299422
H9	11	149357	296788
H10	11	169979	310246
H11	11	155726	328292
H12	11	191675	316697
A1	12	152706	258807
A2	12	133155	238434
A3	12	130661	232707
A4	12	130023	238241
A5	12	122093	226779
A6	12	104991	217461
A7	12	123832	227832
A8	12	133331	231971
A9	12	133785	248435
A10	12	135293	232644
A11	12	143120	268707
A12	12	144129	262929
B1	12	134154	223532
B2	12	158983	264798
B3	12	141746	255278
B4	12	143955	246478
B5	12	144434	264938
B6	12	120398	220404
B7	12	122660	221615
B8	12	134562	246823
B9	12	122179	227078
B10	12	122945	233056
B11	12	141948	257840
B12	12	120893	241719
C1	12	63260.6	219223
C2	12	124297	258253
C3	12	106076	254323
C4	12	118280	249089
C5	12	107879	231990
C6	12	101188	211416
C7	12	99244.1	208746
C8	12	112067	242135
C9	12	104709	227297
C10	12	121873	250634
C11	12	122174	257763
C12	12	133339	284203
D1	12	105816	225992
D2	12	101152	226503
D3	12	124035	237575
D4	12	115506	237394
D5	12	103808	219993
D6	12	102962	210025
D7	12	86663.9	198048
D8	12	109425	236477
D9	12	104394	231190
D10	12	98403.7	230959
D11	12	97281.1	251202
D12	12	134752	311562
E1	12	149959	277586
E2	12	158563	261966
E3	12	138254	254078
E4	12	133042	258269
E5	12	138106	239560
E6	12	147351	263336
E7	12	154972	268972
E8	12	136902	263053
E9	12	140060	269419
E10	12	126895	242190
E11	12	141325	256513
E12	12	121685	280306
F1	12	141285	294866
F2	12	144985	283091
F3	12	153655	263139
F4	12	136775	252397
F5	12	148849	260574
F6	12	153824	292497
F7	12	145948	276004
F8	12	159241	299349
F9	12	147336	282489
F10	12	129248	258655
F11	12	116003	218407
F12	12	121755	275702
G1	12	121642	289111
G2	12	150333	271212
G3	12	135536	257276
G4	12	134299	268208
G5	12	145298	264668
G6	12	150363	290401
G7	12	161922	294507
G8	12	168671	307874
G9	12	155520	282678
G10	12	145856	282935
G11	12	153380	294967
G12	12	128245	243105
H1	12	135886	266766
H2	12	131916	279737
H3	12	126951	282031
H4	12	141659	285308
H5	12	140621	266737
H6	12	161357	312998
H7	12	152919	271844
H8	12	164724	299024
H9	12	149527	297613
H10	12	171416	309766
H11	12	155424	328434
H12	12	191160	316188
A1	13	151860	258921
A2	13	134179	237778
A3	13	131159	232313
A4	13	130162	237597
A5	13	122037	226573
A6	13	105720	217558
A7	13	123316	227626
A8	13	132980	231296
A9	13	134252	247748
A10	13	136647	232147
A11	13	144422	268551
A12	13	145083	263822
B1	13	134419	224989
B2	13	158860	264691
B3	13	141268	255472
B4	13	143576	246362
B5	13	143989	264960
B6	13	120320	221114
B7	13	122737	222226
B8	13	133970	246632
B9	13	122661	226316
B10	13	122708	232819
B11	13	140320	258056
B12	13	121015	241203
C1	13	63292.1	219078
C2	13	124836	257906
C3	13	106931	254075
C4	13	117786	249782
C5	13	107529	230730
C6	13	100496	211799
C7	13	99921.4	209094
C8	13	112407	242457
C9	13	105457	227618
C10	13	122121	250497
C11	13	121469	257046
C12	13	134002	284717
D1	13	106080	226151
D2	13	100894	226934
D3	13	124377	237371
D4	13	114816	237543
D5	13	103660	220112
D6	13	103299	210965
D7	13	86644.5	198123
D8	13	109876	237078
D9	13	103919	231519
D10	13	99438.2	231090
D11	13	98477.5	252081
D12	13	135900	310879
E1	13	148968	277849
E2	13	157210	261314
E3	13	138524	254934
E4	13	132819	258519
E5	13	137412	239187
E6	13	147413	263727
E7	13	155027	269291
E8	13	136807	263124
E9	13	141392	268824
E10	13	127648	242921
E11	13	142309	256393
E12	13	121839	280345
F1	13	141941	294233
F2	13	145971	283360
F3	13	155090	263479
F4	13	136787	252604
F5	13	148804	260478
F6	13	153970	292468
F7	13	145421	276480
F8	13	160707	299646
F9	13	147729	282223
F10	13	129002	258221
F11	13	115167	219403
F12	13	122279	276506
G1	13	122488	288668
G2	13	151040	271147
G3	13	137339	257253
G4	13	135087	269021
G5	13	145476	264743
G6	13	150671	290110
G7	13	162736	294787
G8	13	170472	308108
G9	13	156487	282259
G10	13	146859	282817
G11	13	153625	294994
G12	13	128775	243368
H1	13	136437	267273
H2	13	133323	280300
H3	13	128405	282384
H4	13	143124	285608
H5	13	141389	266860
H6	13	161543	313944
H7	13	153588	272888
H8	13	166738	299507
H9	13	150983	297647
H10	13	170920	310880
H11	13	156372	328746
H12	13	191955	316137
A1	14	153966	259513
A2	14	134995	238274
A3	14	131593	232445
A4	14	130823	236576
A5	14	122305	226806
A6	14	105864	217910
A7	14	123416	228473
A8	14	132390	231720
A9	14	134219	249249
A10	14	138018	232112
A11	14	144496	268945
A12	14	145102	263864
B1	14	135373	224939
B2	14	158470	265431
B3	14	141790	256044
B4	14	144958	247023
B5	14	143770	264707
B6	14	120273	221575
B7	14	123218	221596
B8	14	134990	247078
B9	14	122045	227002
B10	14	122857	232925
B11	14	140560	258390
B12	14	120509	240951
C1	14	63352	219249
C2	14	124889	257974
C3	14	106784	254624
C4	14	117357	250394
C5	14	107806	231426
C6	14	101187	211981
C7	14	100150	209225
C8	14	112641	243340
C9	14	105297	229135
C10	14	122127	251225
C11	14	121678	257382
C12	14	134672	284496
D1	14	106584	226011
D2	14	101328	226622
D3	14	124848	237529
D4	14	115406	237285
D5	14	104365	220336
D6	14	103355	210684
D7	14	87146.6	197937
D8	14	109850	236839
D9	14	105017	231837
D10	14	98963.9	231601
D11	14	97427.6	251600
D12	14	134048	311659
E1	14	148687	278313
E2	14	157514	261931
E3	14	139439	254707
E4	14	133148	258732
E5	14	137646	239139
E6	14	148916	263455
E7	14	156766	268751
E8	14	136785	263148
E9	14	141063	269095
E10	14	127689	242828
E11	14	141042	256879
E12	14	122130	280428
F1	14	142186	295108
F2	14	146060	283312
F3	14	153862	263521
F4	14	137298	252403
F5	14	148780	261174
F6	14	154318	292416
F7	14	145626	276100
F8	14	160443	299463
F9	14	147388	282924
F10	14	129126	259191
F11	14	114862	219653
F12	14	123568	276811
G1	14	124717	288772
G2	14	152513	271817
G3	14	139338	257468
G4	14	135680	268786
G5	14	145883	266144
G6	14	151765	290730
G7	14	166214	295193
G8	14	174087	308546
G9	14	159131	282348
G10	14	148377	282606
G11	14	156322	295642
G12	14	130957	242480
H1	14	139399	266876
H2	14	135565	280628
H3	14	130830	282779
H4	14	144072	285603
H5	14	144300	267328
H6	14	163827	312790
H7	14	154069	272475
H8	14	167663	299469
H9	14	151839	297642
H10	14	173934	309433
H11	14	155713	327998
H12	14	192224	316277
A1	15	152765	258976
A2	15	136175	237402
A3	15	131936	233244
A4	15	129620	237034
A5	15	122777	226344
A6	15	105722	217972
A7	15	124688	228387
A8	15	133810	232399
A9	15	133909	249153
A10	15	139002	232345
A11	15	144311	268895
A12	15	145484	264207
B1	15	135199	224901
B2	15	158474	265339
B3	15	141849	256239
B4	15	145138	246396
B5	15	143790	264680
B6	15	120803	221261
B7	15	123356	221983
B8	15	134677	247573
B9	15	122880	226472
B10	15	122566	232889
B11	15	141198	258523
B12	15	121390	241216
C1	15	63920.2	219121
C2	15	124862	258111
C3	15	107503	254267
C4	15	117562	250116
C5	15	107936	231408
C6	15	100747	211703
C7	15	101495	209273
C8	15	111638	242528
C9	15	105601	229257
C10	15	122459	251384
C11	15	121776	257557
C12	15	133791	283538
D1	15	106327	225860
D2	15	102075	227080
D3	15	124654	237891
D4	15	116215	238175
D5	15	103171	220171
D6	15	103390	210599
D7	15	87166.5	198215
D8	15	109733	237055
D9	15	106838	232185
D10	15	99052	232299
D11	15	97365.7	251646
D12	15	134512	311879
E1	15	148885	278596
E2	15	158085	262534
E3	15	138661	254809
E4	15	132325	258791
E5	15	137309	239866
E6	15	147267	263697
E7	15	155134	269409
E8	15	137217	263417
E9	15	141594	269352
E10	15	127504	243038
E11	15	142108	257424
E12	15	122359	281259
F1	15	141943	294321
F2	15	145806	283643
F3	15	154577	263880
F4	15	136889	252983
F5	15	148971	260965
F6	15	154677	292935
F7	15	145753	276454
F8	15	160009	299769
F9	15	147486	283356
F10	15	129071	258967
F11	15	114018	219957
F12	15	121456	276431
G1	15	128628	289208
G2	15	157045	270764
G3	15	142943	257003
G4	15	136272	269118
G5	15	147851	265341
G6	15	152086	290633
G7	15	173109	295552
G8	15	179772	308810
G9	15	164575	283183
G10	15	151578	283454
G11	15	160653	295412
G12	15	133547	243403
H1	15	146727	268195
H2	15	142093	280475
H3	15	136786	282122
H4	15	147266	285811
H5	15	147539	267305
H6	15	166404	313537
H7	15	157301	272694
H8	15	170925	299397
H9	15	154497	297752
H10	15	176154	310520
H11	15	155452	329265
H12	15	191761	316434
A1	16	152860	260280
A2	16	139268	238560
A3	16	132503	233620
A4	16	130572	237522
A5	16	125224	226791
A6	16	106254	217984
A7	16	124158	228712
A8	16	134078	232289
A9	16	135081	248945
A10	16	142140	232451
A11	16	143728	269505
A12	16	144605	264595
B1	16	135073	225356
B2	16	159781	265592
B3	16	143176	256323
B4	16	146793	247554
B5	16	143985	265209
B6	16	121233	221310
B7	16	122678	222503
B8	16	134967	247773
B9	16	123108	226618
B10	16	123508	233357
B11	16	141052	258797
B12	16	120646	242123
C1	16	64360.7	219724
C2	16	125050	258359
C3	16	106992	254765
C4	16	118163	250653
C5	16	107839	231276
C6	16	101907	212994
C7	16	102022	209580
C8	16	112426	243545
C9	16	105607	230076
C10	16	123201	251199
C11	16	122078	257338
C12	16	135374	284545
D1	16	107554	226157
D2	16	101800	226634
D3	16	124658	237656
D4	16	116265	237474
D5	16	104225	220796
D6	16	103586	211396
D7	16	88372.2	198404
D8	16	111601	237310
D9	16	107432	231624
D10	16	99583.4	231952
D11	16	97572.8	252045
D12	16	135274	311648
E1	16	150020	278189
E2	16	157020	262032
E3	16	139846	254954
E4	16	132541	259000
E5	16	137561	239811
E6	16	147457	263798
E7	16	155849	269470
E8	16	136959	263464
E9	16	140702	268664
E10	16	127902	243403
E11	16	141957	257416
E12	16	122573	281208
F1	16	142588	295333
F2	16	146547	284352
F3	16	154362	264007
F4	16	137440	253617
F5	16	149594	261269
F6	16	154480	292878
F7	16	145840	277246
F8	16	160768	299951
F9	16	148503	283021
F10	16	129494	258871
F11	16	115521	219930
F12	16	122485	276951
G1	16	133973	289901
G2	16	164616	271765
G3	16	149992	257762
G4	16	138220	269826
G5	16	150654	265494
G6	16	153247	290633
G7	16	183691	295453
G8	16	192457	308725
G9	16	174800	283291
G10	16	157880	283108
G11	16	167479	295734
G12	16	138788	243570
H1	16	156777	268177
H2	16	155555	281749
H3	16	146004	283069
H4	16	152103	285741
H5	16	156101	267747
H6	16	171354	314888
H7	16	161378	272304
H8	16	174881	299861
H9	16	159378	298209
H10	16	177153	310778
H11	16	156192	329458
H12	16	192682	317647
A1	17	158317	259131
A2	17	145997	238454
A3	17	134434	233631
A4	17	132137	236776
A5	17	128698	226506
A6	17	106502	218527
A7	17	124688	228415
A8	17	134436	231946
A9	17	134978	249321
A10	17	147986	232834
A11	17	143455	270094
A12	17	145852	263922
B1	17	138243	225195
B2	17	159551	265608
B3	17	144550	256565
B4	17	149620	246940
B5	17	144126	264670
B6	17	121128	221437
B7	17	124347	222712
B8	17	135138	248345
B9	17	123929	227654
B10	17	123851	233275
B11	17	142989	258784
B12	17	121520	241659
C1	17	65087.9	219331
C2	17	126342	258455
C3	17	108235	255303
C4	17	119373	250703
C5	17	107588	231124
C6	17	102143	212474
C7	17	104418	209686
C8	17	112055	243776
C9	17	106361	230492
C10	17	123940	252162
C11	17	121879	257354
C12	17	136664	284131
D1	17	108753	226384
D2	17	102562	226422
D3	17	124791	238662
D4	17	116936	237711
D5	17	105313	220554
D6	17	105610	211277
D7	17	89661.6	198433
D8	17	111241	237311
D9	17	111202	232869
D10	17	100491	232218
D11	17	97519.9	252826
D12	17	135524	311687
E1	17	149123	277695
E2	17	157235	262234
E3	17	140307	255557
E4	17	132037	259461
E5	17	138861	239929
E6	17	147394	263792
E7	17	155613	269511
E8	17	136901	263377
E9	17	140177	268822
E10	17	128340	242965
E11	17	142160	257679
E12	17	123117	281285
F1	17	143305	295129
F2	17	146352	283670
F3	17	154845	264301
F4	17	137744	253389
F5	17	150044	261712
F6	17	154617	293400
F7	17	145645	277218
F8	17	161085	300094
F9	17	148531	283114
F10	17	128941	259335
F11	17	114648	219508
F12	17	121882	277134
G1	17	147099	289092
G2	17	178210	271835
G3	17	163880	257149
G4	17	141101	269120
G5	17	155729	266538
G6	17	158646	291542
G7	17	205641	295232
G8	17	216697	309156
G9	17	193936	283280
G10	17	170230	283676
G11	17	184344	295435
G12	17	148931	243525
H1	17	175016	267862
H2	17	174713	281070
H3	17	165617	282741
H4	17	161720	285614
H5	17	170742	267521
H6	17	180952	314066
H7	17	170569	272431
H8	17	184284	299776
H9	17	168331	298022
H10	17	183018	309895
H11	17	157322	328233
H12	17	192774	316755
A1	18	161055	260553
A2	18	157372	238274
A3	18	137766	233554
A4	18	134217	236889
A5	18	135816	227010
A6	18	107501	218510
A7	18	126690	229133
A8	18	136099	232438
A9	18	135862	249898
A10	18	160333	232902
A11	18	144732	270211
A12	18	145819	264178
B1	18	141149	225460
B2	18	160014	265718
B3	18	147141	256552
B4	18	155106	247055
B5	18	145284	264779
B6	18	122304	222030
B7	18	127165	222644
B8	18	136846	247790
B9	18	125032	227600
B10	18	123200	233585
B11	18	143996	259008
B12	18	122007	241223
C1	18	65142.9	220161
C2	18	128018	259083
C3	18	109143	255120
C4	18	120618	250555
C5	18	108294	231311
C6	18	103134	212845
C7	18	108254	209960
C8	18	113167	243315
C9	18	108016	229748
C10	18	123834	252451
C11	18	122241	258283
C12	18	138195	284568
D1	18	109949	226889
D2	18	103587	226882
D3	18	125415	238812
D4	18	118265	238129
D5	18	106160	220208
D6	18	107325	211166
D7	18	92750.7	198732
D8	18	111618	237340
D9	18	118198	232575
D10	18	102380	232471
D11	18	97904.2	252205
D12	18	136323	312530
E1	18	149622	278152
E2	18	157169	262599
E3	18	139943	255084
E4	18	133656	259360
E5	18	138863	239642
E6	18	147990	263834
E7	18	155552	269843
E8	18	137942	263854
E9	18	140463	269128
E10	18	128442	242955
E11	18	142585	257837
E12	18	122201	281489
F1	18	142144	294947
F2	18	145882	284563
F3	18	155124	264604
F4	18	137846	253787
F5	18	149633	261572
F6	18	155441	293025
F7	18	146212	277106
F8	18	161358	300647
F9	18	147783	283218
F10	18	128873	258698
F11	18	115133	220790
F12	18	122043	276586
G1	18	171121	290046
G2	18	205513	271361
G3	18	190027	257995
G4	18	147361	269577
G5	18	166088	266501
G6	18	167723	290872
G7	18	245953	295381
G8	18	260009	308777
G9	18	228705	283564
G10	18	192866	283872
G11	18	212966	296246
G12	18	167890	243824
H1	18	211588	268474
H2	18	212375	282147
H3	18	201703	283470
H4	18	181423	286134
H5	18	199067	268573
H6	18	200598	314370
H7	18	186772	272947
H8	18	202313	300090
H9	18	185638	298803
H10	18	191530	310529
H11	18	160098	328776
H12	18	194866	317715
A1	19	170146	260049
A2	19	179147	238465
A3	19	143230	233503
A4	19	139831	237262
A5	19	149997	226778
A6	19	109644	218886
A7	19	128108	228977
A8	19	138456	232423
A9	19	137388	249806
A10	19	181992	233196
A11	19	146193	269943
A12	19	147183	264321
B1	19	146492	225815
B2	19	159943	265576
B3	19	151208	256708
B4	19	167427	247200
B5	19	146106	265032
B6	19	123537	221602
B7	19	130959	222504
B8	19	139968	248477
B9	19	128358	227782
B10	19	124708	233968
B11	19	149412	259410
B12	19	122968	241764
C1	19	65820.9	219780
C2	19	131875	259292
C3	19	110162	255656
C4	19	124279	251135
C5	19	109043	231566
C6	19	105328	212562
C7	19	115923	210353
C8	19	114156	243825
C9	19	110823	230572
C10	19	124889	252148
C11	19	122613	257093
C12	19	142527	285054
D1	19	113669	226685
D2	19	104964	227108
D3	19	126440	238752
D4	19	122236	238356
D5	19	107321	221124
D6	19	110760	211269
D7	19	97923.9	199340
D8	19	113099	238481
D9	19	130367	232550
D10	19	105539	232432
D11	19	97689.7	252189
D12	19	138782	312256
E1	19	150584	278145
E2	19	158259	263066
E3	19	140351	256481
E4	19	132849	258965
E5	19	140001	240095
E6	19	149093	264454
E7	19	156010	269883
E8	19	137513	264070
E9	19	140403	269970
E10	19	129703	243202
E11	19	142395	258175
E12	19	123285	281878
F1	19	141684	295424
F2	19	145920	284551
F3	19	155980	264921
F4	19	139856	253653
F5	19	151206	261603
F6	19	155811	293487
F7	19	146024	277544
F8	19	162454	301036
F9	19	149084	283599
F10	19	128349	259268
F11	19	114024	219965
F12	19	121364	277164
G1	19	213568	290000
G2	19	253508	272393
G3	19	235729	257410
G4	19	158184	269931
G5	19	186356	266313
G6	19	183821	290992
G7	19	314371	295813
G8	19	335421	309705
G9	19	291647	283393
G10	19	235417	284163
G11	19	266266	295521
G12	19	203074	243959
H1	19	274695	268797
H2	19	280849	281742
H3	19	264802	283507
H4	19	216378	285658
H5	19	250101	268012
H6	19	237300	314230
H7	19	218620	272449
H8	19	235837	300352
H9	19	219647	298474
H10	19	207886	311392
H11	19	166103	330186
H12	19	200222	317952
A1	20	190076	259632
A2	20	217821	238578
A3	20	155341	233812
A4	20	149403	237067
A5	20	177692	226802
A6	20	114563	219033
A7	20	133368	229455
A8	20	143851	233045
A9	20	140787	249695
A10	20	219875	232281
A11	20	147926	270082
A12	20	149258	264722
B1	20	159227	225198
B2	20	161700	265800
B3	20	161787	257082
B4	20	187966	247372
B5	20	149053	265559
B6	20	126800	221521
B7	20	139605	222815
B8	20	145149	248564
B9	20	133936	227897
B10	20	125652	234127
B11	20	156619	259590
B12	20	124752	240984
C1	20	67395.5	219960
C2	20	136491	259238
C3	20	113252	256242
C4	20	130620	251651
C5	20	110655	232004
C6	20	109447	212944
C7	20	129316	210254
C8	20	115192	243838
C9	20	114467	230855
C10	20	126298	252608
C11	20	123504	257749
C12	20	151443	284696
D1	20	120481	226721
D2	20	107279	227012
D3	20	127465	238951
D4	20	127482	238544
D5	20	111265	221006
D6	20	117294	211623
D7	20	109421	199080
D8	20	115546	237952
D9	20	154548	233236
D10	20	111669	233206
D11	20	101349	253056
D12	20	143613	312492
E1	20	150621	278973
E2	20	158654	263317
E3	20	140354	256095
E4	20	134606	259813
E5	20	141612	240405
E6	20	151404	264387
E7	20	156483	269955
E8	20	138785	263824
E9	20	141773	268957
E10	20	130205	243814
E11	20	142197	257792
E12	20	123616	281456
F1	20	142723	295124
F2	20	146173	285419
F3	20	156688	265115
F4	20	140807	253597
F5	20	153873	262185
F6	20	157114	293640
F7	20	146818	277578
F8	20	166269	300863
F9	20	149931	283522
F10	20	127771	259964
F11	20	115325	220523
F12	20	121311	277412
G1	20	283809	290343
G2	20	329234	271937
G3	20	309982	258344
G4	20	180114	270055
G5	20	222785	266176
G6	20	215127	291897
G7	20	415282	295858
G8	20	441010	309099
G9	20	389914	284314
G10	20	311217	284432
G11	20	356123	296478
G12	20	265064	242909
H1	20	372206	268005
H2	20	383329	282291
H3	20	366092	283338
H4	20	281672	285793
H5	20	335295	268079
H6	20	305325	315146
H7	20	275087	272998
H8	20	297276	300358
H9	20	281107	298915
H10	20	239601	310924
H11	20	176470	329098
H12	20	210813	317019
A1	21	220141	260003
A2	21	279446	238736
A3	21	178173	234443
A4	21	170903	237215
A5	21	221695	226914
A6	21	122314	218719
A7	21	140835	229642
A8	21	153551	232588
A9	21	146385	249803
A10	21	282208	233099
A11	21	151151	270335
A12	21	152089	264003
B1	21	182045	226019
B2	21	162405	265808
B3	21	180835	256563
B4	21	225324	247977
B5	21	152580	265578
B6	21	132590	221911
B7	21	155962	222536
B8	21	154738	248491
B9	21	144964	227372
B10	21	129947	234259
B11	21	173304	259527
B12	21	128231	241822
C1	21	71624	219756
C2	21	147777	259314
C3	21	119825	255215
C4	21	143706	251217
C5	21	112815	231864
C6	21	117092	213688
C7	21	154250	210400
C8	21	118363	243723
C9	21	122990	230997
C10	21	129259	252574
C11	21	124258	257059
C12	21	165202	285139
D1	21	133217	226982
D2	21	111757	226935
D3	21	130160	239129
D4	21	139615	238948
D5	21	117763	221503
D6	21	130791	212402
D7	21	127727	199265
D8	21	121074	237699
D9	21	195739	232763
D10	21	123174	232814
D11	21	104270	252672
D12	21	150428	312443
E1	21	151778	279428
E2	21	159046	263329
E3	21	141588	256098
E4	21	135219	260576
E5	21	145585	240486
E6	21	154119	264740
E7	21	157003	270229
E8	21	140460	264947
E9	21	142978	269212
E10	21	132598	243637
E11	21	142979	257781
E12	21	123239	281781
F1	21	143409	295547
F2	21	146682	285462
F3	21	157245	265748
F4	21	144938	253955
F5	21	158937	262085
F6	21	160412	293870
F7	21	147139	278015
F8	21	172152	301090
F9	21	152794	284371
F10	21	129336	260582
F11	21	115368	220912
F12	21	122384	277524
G1	21	373217	290587
[truncated: 10,775 more rows]

## Sheet: Amplification Data
Block Type	96fast
Chemistry	SYBR_GREEN
Experiment File Name	S:\LQW\ZHB\2014-4-4.eds
Experiment Run End Time	2012-05-24 01:58:16 AM CST
Instrument Type	sds7500fast
Passive Reference	ROX
Well	Cycle	Target Name	Rn	ΔRn
A1	1	1230	0.510338	-0.0345986
A1	2	1230	0.520812	-0.027921
A1	3	1230	0.536379	-0.0161506
A1	4	1230	0.54948	-0.00684592
A1	5	1230	0.555428	-0.0046953
A1	6	1230	0.568647	0.00472756
A1	7	1230	0.576874	0.00915734
A1	8	1230	0.584683	0.0131694
A1	9	1230	0.584392	0.00908157
A1	10	1230	0.584609	0.00550174
A1	11	1230	0.588151	0.00524695
A1	12	1230	0.590036	0.00333581
A1	13	1230	0.586512	-0.00398493
A1	14	1230	0.593288	-0.00100557
A1	15	1230	0.589879	-0.00821169
A1	16	1230	0.58729	-0.0145976
A1	17	1230	0.610955	0.00527123
A1	18	1230	0.618128	0.00864708
A1	19	1230	0.654285	0.0410077
A1	20	1230	0.732098	0.115024
A1	21	1230	0.846689	0.225818
A1	22	1230	1.05693	0.432263
A1	23	1230	1.34531	0.716847
A1	24	1230	1.717	1.08474
A1	25	1230	2.06882	1.43276
A1	26	1230	2.34866	1.7088
A1	27	1230	2.55417	1.91052
A1	28	1230	2.71322	2.06577
A1	29	1230	2.81303	2.16179
A1	30	1230	2.86703	2.21199
A1	31	1230	2.89945	2.24061
A1	32	1230	2.92732	2.26468
A1	33	1230	2.92929	2.26286
A1	34	1230	2.92498	2.25475
A1	35	1230	2.92899	2.25496
A1	36	1230	2.92357	2.24575
A1	37	1230	2.92405	2.24243
A1	38	1230	2.93375	2.24834
A1	39	1230	2.93152	2.24231
A1	40	1230	2.93522	2.24221
A2	1	1230	0.476442	-0.0363964
A2	2	1230	0.490014	-0.0275261
A2	3	1230	0.506875	-0.0153686
A2	4	1230	0.520649	-0.00629639
A2	5	1230	0.529413	-0.00223498
A2	6	1230	0.544212	0.0078611
A2	7	1230	0.551569	0.0105153
A2	8	1230	0.557937	0.0121804
A2	9	1230	0.560075	0.00961571
A2	10	1230	0.560164	0.00500286
A2	11	1230	0.55708	-0.00278406
A2	12	1230	0.558457	-0.00610922
A2	13	1230	0.564304	-0.00496492
A2	14	1230	0.566555	-0.00741728
A2	15	1230	0.573606	-0.00506903
A2	16	1230	0.583786	0.000408887
A2	17	1230	0.612266	0.0241865
A2	18	1230	0.660465	0.0676826
A2	19	1230	0.751251	0.153766
A2	20	1230	0.912998	0.31081
A2	21	1230	1.17052	0.563628
A2	22	1230	1.53153	0.919935
A2	23	1230	1.92912	1.31283
A2	24	1230	2.29294	1.67194
A2	25	1230	2.57008	1.94438
A2	26	1230	2.77098	2.14058
A2	27	1230	2.9071	2.272
A2	28	1230	3.00587	2.36606
A2	29	1230	3.0561	2.41159
A2	30	1230	3.07035	2.42114
A2	31	1230	3.08237	2.42846
A2	32	1230	3.0955	2.43688
A2	33	1230	3.08972	2.4264
A2	34	1230	3.10055	2.43252
A2	35	1230	3.08891	2.41619
A2	36	1230	3.09282	2.41539
A2	37	1230	3.10614	2.42401
A2	38	1230	3.0934	2.40657
A2	39	1230	3.10538	2.41384
A2	40	1230	3.09679	2.40055
A3	1	1230	0.479536	-0.0344251
A3	2	1230	0.493757	-0.0244311
A3	3	1230	0.5064	-0.0160161
A3	4	1230	0.517529	-0.0091149
A3	5	1230	0.5283	-0.00257145
A3	6	1230	0.536689	0.0015896
A3	7	1230	0.548761	0.0094341
A3	8	1230	0.555539	0.0119843
A3	9	1230	0.564089	0.0163072
A3	10	1230	0.556541	0.00453111
A3	11	1230	0.559683	0.00344618
A3	12	1230	0.561481	0.00101663
A3	13	1230	0.564576	-0.000116764
A3	14	1230	0.566123	-0.00279719
A3	15	1230	0.565655	-0.00749256
A3	16	1230	0.567175	-0.0102001
A3	17	1230	0.575413	-0.00619028
A3	18	1230	0.589866	0.00403561
A3	19	1230	0.613399	0.0233409
A3	20	1230	0.664382	0.0700958
A3	21	1230	0.759984	0.161471
A3	22	1230	0.923663	0.320921
A3	23	1230	1.19828	0.59131
A3	24	1230	1.57364	0.962442
A3	25	1230	1.99328	1.37785
A3	26	1230	2.37641	1.75676
A3	27	1230	2.65992	2.03604
A3	28	1230	2.87143	2.24332
A3	29	1230	3.01425	2.38191
A3	30	1230	3.10838	2.47182
A3	31	1230	3.1807	2.53991
A3	32	1230	3.19702	2.552
A3	33	1230	3.19727	2.54802
A3	34	1230	3.20658	2.55311
A3	35	1230	3.19812	2.54042
A3	36	1230	3.19756	2.53563
A3	37	1230	3.21636	2.5502
A3	38	1230	3.21579	2.54541
A3	39	1230	3.20297	2.52836
A3	40	1230	3.20713	2.52829
A4	1	1230	0.440169	-0.0471489
A4	2	1230	0.452475	-0.0398239
A4	3	1230	0.478135	-0.0191456
A4	4	1230	0.492113	-0.0101491
A4	5	1230	0.501788	-0.00545544
A4	6	1230	0.515899	0.00367466
A4	7	1230	0.522146	0.00494005
A4	8	1230	0.531512	0.00932406
A4	9	1230	0.539375	0.0122064
A4	10	1230	0.550267	0.0181161
A4	11	1230	0.549811	0.0126793
A4	12	1230	0.545764	0.00365081
A4	13	1230	0.547827	0.000731825
A4	14	1230	0.552987	0.000910319
A4	15	1230	0.54684	-0.0102178
A4	16	1230	0.549727	-0.012312
A4	17	1230	0.558067	-0.00895354
A4	18	1230	0.566582	-0.00541949
A4	19	1230	0.589352	0.0123688
A4	20	1230	0.630216	0.0482511
A4	21	1230	0.720456	0.133509
A4	22	1230	0.870168	0.27824
A4	23	1230	1.1225	0.525595
A4	24	1230	1.47595	0.874057
A4	25	1230	1.89835	1.29148
A4	26	1230	2.2851	1.67325
A4	27	1230	2.58802	1.97119
A4	28	1230	2.81909	2.19727
A4	29	1230	2.97174	2.34495
A4	30	1230	3.08626	2.45448
A4	31	1230	3.15797	2.52121
A4	32	1230	3.20395	2.56221
A4	33	1230	3.21666	2.56993
A4	34	1230	3.22849	2.57679
A4	35	1230	3.2254	2.56871
A4	36	1230	3.22977	2.56811
A4	37	1230	3.23668	2.57003
A4	38	1230	3.24132	2.56969
A4	39	1230	3.23897	2.56236
A4	40	1230	3.24718	2.56559
A5	1	1230	0.458613	-0.0227438
A5	2	1230	0.471581	-0.0148721
A5	3	1230	0.479933	-0.0116151
A5	4	1230	0.491072	-0.00557221
A5	5	1230	0.498373	-0.00336704
A5	6	1230	0.507367	0.000531653
A5	7	1230	0.517703	0.00577178
A5	8	1230	0.52372	0.00669312
A5	9	1230	0.532073	0.0099496
A5	10	1230	0.540719	0.0135006
A5	11	1230	0.537951	0.00563693
A5	12	1230	0.538379	0.000968674
A5	13	1230	0.538623	-0.00388322
A5	14	1230	0.539249	-0.00835306
A5	15	1230	0.542436	-0.0102617
A5	16	1230	0.552157	-0.00563596
A5	17	1230	0.568187	0.00529832
A5	18	1230	0.598281	0.0302967
A5	19	1230	0.661428	0.0883479
A5	20	1230	0.783471	0.205295
A5	21	1230	0.977002	0.39373
A5	22	1230	1.28577	0.697405
A5	23	1230	1.68081	1.08735
A5	24	1230	2.08051	1.48195
A5	25	1230	2.4066	1.80294
A5	26	1230	2.66904	2.06029
A5	27	1230	2.85014	2.23629
A5	28	1230	2.98828	2.36934
A5	29	1230	3.06716	2.44312
A5	30	1230	3.11384	2.4847
A5	31	1230	3.14198	2.50775
A5	32	1230	3.15047	2.51115
A5	33	1230	3.15542	2.511
A5	34	1230	3.16749	2.51797
A5	35	1230	3.16693	2.51232
A5	36	1230	3.17142	2.51171
A5	37	1230	3.16112	2.49631
A5	38	1230	3.16572	2.49582
A5	39	1230	3.16612	2.49112
A5	40	1230	3.15826	2.47817
A6	1	1230	0.459923	-0.0255552
A6	2	1230	0.471495	-0.0141063
A6	3	1230	0.483779	-0.00194561
A6	4	1230	0.488535	0.0026871
A6	5	1230	0.486199	0.000228547
A6	6	1230	0.486215	0.000121102
A6	7	1230	0.486745	0.000528283
A6	8	1230	0.487355	0.00101507
A6	9	1230	0.487724	0.00126033
A6	10	1230	0.485959	-0.000627475
A6	11	1230	0.487507	0.000796651
A6	12	1230	0.482804	-0.00402895
A6	13	1230	0.485939	-0.00101713
A6	14	1230	0.485813	-0.00126635
A6	15	1230	0.485024	-0.0021787
A6	16	1230	0.48744	0.000113781
A6	17	1230	0.487362	-8.78393e-05
A6	18	1230	0.491974	0.00440119
A6	19	1230	0.500916	0.0132195
A6	20	1230	0.523039	0.0352199
A6	21	1230	0.559231	0.0712883
A6	22	1230	0.627295	0.139229
A6	23	1230	0.752678	0.264489
A6	24	1230	0.979701	0.491388
A6	25	1230	1.32198	0.833549
A6	26	1230	1.75777	1.26921
A6	27	1230	2.19669	1.70801
A6	28	1230	2.56731	2.07851
A6	29	1230	2.83031	2.34138
A6	30	1230	3.0281	2.53905
A6	31	1230	3.17927	2.69009
A6	32	1230	3.27565	2.78635
A6	33	1230	3.32326	2.83384
A6	34	1230	3.36107	2.87152
A6	35	1230	3.3691	2.87943
A6	36	1230	3.37466	2.88487
A6	37	1230	3.37092	2.88101
A6	38	1230	3.37576	2.88572
A6	39	1230	3.37728	2.88712
A6	40	1230	3.37653	2.88625
A7	1	1230	0.51594	-0.0273013
A7	2	1230	0.52906	-0.0142924
A7	3	1230	0.54299	-0.000473162
A7	4	1230	0.547842	0.00426847
A7	5	1230	0.546318	0.00263419
A7	6	1230	0.545363	0.00156771
A7	7	1230	0.543117	-0.000788261
A7	8	1230	0.54061	-0.00340643
A7	9	1230	0.542758	-0.00136847
A7	10	1230	0.544676	0.000438709
A7	11	1230	0.54196	-0.00238796
A7	12	1230	0.543525	-0.00093406
A7	13	1230	0.541748	-0.0028213
A7	14	1230	0.540179	-0.00450123
A7	15	1230	0.545948	0.00115747
A7	16	1230	0.542858	-0.00204315
A7	17	1230	0.545881	0.000868974
A7	18	1230	0.552911	0.0077885
A7	19	1230	0.559482	0.0142487
A7	20	1230	0.581241	0.0358964
A7	21	1230	0.613282	0.0678275
A7	22	1230	0.685875	0.140309
A7	23	1230	0.813296	0.267619
A7	24	1230	1.03073	0.484947
A7	25	1230	1.37542	0.82952
A7	26	1230	1.80275	1.25674
A7	27	1230	2.22674	1.68062
A7	28	1230	2.5846	2.03837
A7	29	1230	2.85101	2.30467
A7	30	1230	3.04133	2.49488
A7	31	1230	3.17601	2.62945
A7	32	1230	3.27318	2.7265
A7	33	1230	3.32799	2.78121
A7	34	1230	3.34014	2.79325
A7	35	1230	3.34566	2.79866
A7	36	1230	3.36642	2.81931
A7	37	1230	3.37014	2.82292
A7	38	1230	3.36838	2.82104
A7	39	1230	3.37825	2.8308
A7	40	1230	3.37242	2.82486
A8	1	1230	0.516149	-0.0320105
A8	2	1230	0.529014	-0.0213889
A8	3	1230	0.535096	-0.0175504
A8	4	1230	0.544972	-0.00991702
A8	5	1230	0.555636	-0.00149676
A8	6	1230	0.565217	0.00584091
A8	7	1230	0.574192	0.012573
A8	8	1230	0.577961	0.0140988
A8	9	1230	0.572429	0.00632315
A8	10	1230	0.571522	0.00317326
A8	11	1230	0.574581	0.0039891
A8	12	1230	0.574776	0.00194023
A8	13	1230	0.574935	-0.000143695
A8	14	1230	0.571335	-0.00598724
A8	15	1230	0.575777	-0.00378785
A8	16	1230	0.577204	-0.00460387
A8	17	1230	0.5796	-0.00445172
A8	18	1230	0.585528	-0.000766868
A8	19	1230	0.595704	0.00716649
A8	20	1230	0.617267	0.0264855
A8	21	1230	0.660185	0.0671607
A8	22	1230	0.740776	0.145508
A8	23	1230	0.884197	0.286686
A8	24	1230	1.13702	0.537262
A8	25	1230	1.49618	0.894186
A8	26	1230	1.93617	1.33193
A8	27	1230	2.35221	1.74573
A8	28	1230	2.69692	2.08819
A8	29	1230	2.94183	2.33086
A8	30	1230	3.11997	2.50676
A8	31	1230	3.2491	2.63364
A8	32	1230	3.33254	2.71484
A8	33	1230	3.37466	2.75472
A8	34	1230	3.38737	2.76518
A8	35	1230	3.39533	2.7709
A8	36	1230	3.40301	2.77634
A8	37	1230	3.41415	2.78523
A8	38	1230	3.41623	2.78507
A8	39	1230	3.40754	2.77414
A8	40	1230	3.40641	2.77076
A9	1	1230	0.538894	-0.0068244
A9	2	1230	0.541474	-0.00388211
A9	3	1230	0.547126	0.0021325
A9	4	1230	0.548343	0.00371306
A9	5	1230	0.543193	-0.00107484
A9	6	1230	0.542218	-0.00168726
A9	7	1230	0.541547	-0.00199599
A9	8	1230	0.545142	0.00196184
A9	9	1230	0.54343	0.000612537
A9	10	1230	0.542003	-0.00045174
A9	11	1230	0.539355	-0.00273678
A9	12	1230	0.538511	-0.00321854
A9	13	1230	0.54189	0.000522805
A9	14	1230	0.538496	-0.00250807
A9	15	1230	0.537456	-0.00318581
A9	16	1230	0.542614	0.00233426
A9	17	1230	0.541381	0.00146417
A9	18	1230	0.543672	0.00411785
A9	19	1230	0.54998	0.010789
A9	20	1230	0.563836	0.0250069
A9	21	1230	0.586001	0.0475349
A9	22	1230	0.63288	0.0947765
A9	23	1230	0.723453	0.185711
A9	24	1230	0.87883	0.341452
A9	25	1230	1.13907	0.602056
A9	26	1230	1.50957	0.972918
A9	27	1230	1.93571	1.39941
A9	28	1230	2.31724	1.78131
A9	29	1230	2.6088	2.07323
A9	30	1230	2.82897	2.29377
A9	31	1230	3.00283	2.46799
A9	32	1230	3.10891	2.57444
A9	33	1230	3.18525	2.65114
A9	34	1230	3.22529	2.69154
A9	35	1230	3.23561	2.70222
A9	36	1230	3.24816	2.71514
A9	37	1230	3.25488	2.72221
A9	38	1230	3.25066	2.71836
A9	39	1230	3.25503	2.72309
A9	40	1230	3.26093	2.72936
A10	1	1230	0.501337	-0.0390961
A10	2	1230	0.524133	-0.0207656
A10	3	1230	0.538185	-0.0111801
A10	4	1230	0.545219	-0.00861146
A10	5	1230	0.558766	0.000469726
A10	6	1230	0.565187	0.00242476
A10	7	1230	0.581838	0.0146097
A10	8	1230	0.582298	0.0106045
A10	9	1230	0.581201	0.00504189
A10	10	1230	0.584648	0.00402289
A10	11	1230	0.58499	-0.000100974
A10	12	1230	0.581545	-0.00801224
A10	13	1230	0.588624	-0.00539899
A10	14	1230	0.594619	-0.00386977
A10	15	1230	0.598258	-0.00469624
A10	16	1230	0.611486	0.00406618
A10	17	1230	0.635584	0.0236975
A10	18	1230	0.688412	0.0720601
A10	19	1230	0.780424	0.159606
A10	20	1230	0.946591	0.321307
A10	21	1230	1.21068	0.580932
A10	22	1230	1.57162	0.937407
A10	23	1230	1.97775	1.33907
A10	24	1230	2.34009	1.69695
A10	25	1230	2.6211	1.97349
A10	26	1230	2.82658	2.1745
A10	27	1230	2.96723	2.31068
A10	28	1230	3.06676	2.40575
A10	29	1230	3.12617	2.46069
A10	30	1230	3.15056	2.48062
A10	31	1230	3.15818	2.48377
A10	32	1230	3.16886	2.48999
A10	33	1230	3.16319	2.47985
A10	34	1230	3.17132	2.48351
A10	35	1230	3.17059	2.47832
A10	36	1230	3.17957	2.48283
A10	37	1230	3.1817	2.4805
A10	38	1230	3.18095	2.47528
A10	39	1230	3.18221	2.47207
A10	40	1230	3.1872	2.4726
A11	1	1230	0.516418	-0.0210786
A11	2	1230	0.526578	-0.0108114
A11	3	1230	0.536575	-0.00070715
A11	4	1230	0.53591	-0.00126529
A11	5	1230	0.539718	0.00264935
A11	6	1230	0.54091	0.00394903
A11	7	1230	0.534963	-0.00189128
A11	8	1230	0.536793	4.61011e-05
A11	9	1230	0.537607	0.000966867
A11	10	1230	0.5334	-0.00313334
A11	11	1230	0.537368	0.000942297
A11	12	1230	0.532627	-0.00369155
A11	13	1230	0.537783	0.00157171
A11	14	1230	0.537271	0.00116603
A11	15	1230	0.536683	0.000685494
A11	16	1230	0.533304	-0.00258597
A11	17	1230	0.53113	-0.00465349
A11	18	1230	0.535626	-4.98089e-05
A11	19	1230	0.54157	0.00600101
A11	20	1230	0.54771	0.0122476
A11	21	1230	0.559125	0.0237707
A11	22	1230	0.58796	0.0527125
A11	23	1230	0.637802	0.102662
A11	24	1230	0.740463	0.205429
A11	25	1230	0.910082	0.375155
A11	26	1230	1.18276	0.647936
A11	27	1230	1.54988	1.01516
A11	28	1230	1.93747	1.40287
A11	29	1230	2.28406	1.74956
A11	30	1230	2.55121	2.01682
A11	31	1230	2.7391	2.20482
A11	32	1230	2.88506	2.35088
A11	33	1230	2.97744	2.44337
A11	34	1230	3.03938	2.50542
A11	35	1230	3.07992	2.54607
A11	36	1230	3.09196	2.55821
A11	37	1230	3.10543	2.57179
A11	38	1230	3.10364	2.57011
A11	39	1230	3.10794	2.57451
A11	40	1230	3.11177	2.57845
A12	1	1230	0.534559	-0.0195511
A12	2	1230	0.549078	-0.00484469
A12	3	1230	0.55359	-0.000143514
A12	4	1230	0.554902	0.00135588
A12	5	1230	0.556993	0.0036352
A12	6	1230	0.551101	-0.00206851
A12	7	1230	0.553555	0.000573858
A12	8	1230	0.553308	0.000514886
A12	9	1230	0.553818	0.00121301
A12	10	1230	0.551732	-0.000684404
A12	11	1230	0.552272	4.34062e-05
A12	12	1230	0.548167	-0.00387282
A12	13	1230	0.54993	-0.00192222
A12	14	1230	0.549913	-0.00175112
A12	15	1230	0.550644	-0.000831858
A12	16	1230	0.546515	-0.00477252
A12	17	1230	0.552633	0.0015344
A12	18	1230	0.551974	0.00106303
A12	19	1230	0.556836	0.0061133
A12	20	1230	0.563832	0.0132973
A12	21	1230	0.576087	0.0257408
A12	22	1230	0.602355	0.0521969
A12	23	1230	0.65316	0.103191
A12	24	1230	0.754065	0.204284
A12	25	1230	0.92442	0.374827
A12	26	1230	1.19606	0.64665
A12	27	1230	1.56185	1.01263
A12	28	1230	1.94729	1.39826
A12	29	1230	2.28588	1.73704
A12	30	1230	2.53962	1.99097
A12	31	1230	2.73523	2.18677
A12	32	1230	2.8693	2.32102
A12	33	1230	2.95114	2.40306
A12	34	1230	3.01696	2.46906
A12	35	1230	3.04873	2.50102
A12	36	1230	3.05622	2.5087
A12	37	1230	3.06068	2.51335
A12	38	1230	3.06523	2.51809
A12	39	1230	3.05941	2.51245
A12	40	1230	3.06826	2.52149
B1	1	1230	0.521919	-0.0328118
B1	2	1230	0.533355	-0.0254528
B1	3	1230	0.547688	-0.0151971
B1	4	1230	0.557187	-0.00977547
B1	5	1230	0.567489	-0.00355076
B1	6	1230	0.578019	0.00290259
B1	7	1230	0.593176	0.0139825
B1	8	1230	0.597142	0.0138716
B1	9	1230	0.597456	0.0101079
B1	10	1230	0.598248	0.00682345
B1	11	1230	0.59854	0.00303815
B1	12	1230	0.600156	0.000577208
B1	13	1230	0.597446	-0.00621043
B1	14	1230	0.601824	-0.00590959
B1	15	1230	0.60115	-0.0106601
B1	16	1230	0.599374	-0.0165137
B1	17	1230	0.613878	-0.00608669
B1	18	1230	0.62605	0.00200781
B1	19	1230	0.648726	0.0206073
B1	20	1230	0.707051	0.0748545
B1	21	1230	0.805441	0.169168
B1	22	1230	0.970613	0.330263
B1	23	1230	1.22651	0.582086
B1	24	1230	1.55096	0.902456
B1	25	1230	1.86708	1.2145
B1	26	1230	2.15347	1.49681
B1	27	1230	2.3737	1.71296
B1	28	1230	2.5285	1.86368
B1	29	1230	2.63711	1.96822
B1	30	1230	2.70969	2.03672
B1	31	1230	2.74787	2.07082
B1	32	1230	2.77952	2.0984
B1	33	1230	2.7829	2.0977
B1	34	1230	2.79239	2.10312
B1	35	1230	2.79743	2.10408
B1	36	1230	2.78901	2.09158
B1	37	1230	2.79332	2.09181
B1	38	1230	2.79272	2.08713
B1	39	1230	2.79384	2.08418
B1	40	1230	2.79643	2.0827
B2	1	1230	0.587128	-0.0176222
B2	2	1230	0.605309	0.000792572
B2	3	1230	0.609917	0.00563349
B2	4	1230	0.606759	0.00270894
B2	5	1230	0.604348	0.000531054
B2	6	1230	0.604026	0.000442729
B2	7	1230	0.604302	0.000951464
B2	8	1230	0.600487	-0.00262945
B2	9	1230	0.599689	-0.00319468
B2	10	1230	0.602994	0.000343405
B2	11	1230	0.598942	-0.00347498
B2	12	1230	0.600393	-0.00179042
B2	13	1230	0.600171	-0.00177909
B2	14	1230	0.597027	-0.00469053
B2	15	1230	0.597249	-0.00423442
B2	16	1230	0.601603	0.000352639
B2	17	1230	0.600702	-0.000315639
B2	18	1230	0.602195	0.0014107
B2	19	1230	0.602248	0.00169747
B2	20	1230	0.608355	0.00803732
B2	21	1230	0.610986	0.0109019
B2	22	1230	0.629373	0.0295221
B2	23	1230	0.654923	0.055306
B2	24	1230	0.710828	0.111444
B2	25	1230	0.809752	0.210601
B2	26	1230	0.9866	0.387682
B2	27	1230	1.26459	0.665902
B2	28	1230	1.64022	1.04177
B2	29	1230	2.02916	1.43094
B2	30	1230	2.36344	1.76546
B2	31	1230	2.62121	2.02346
B2	32	1230	2.81044	2.21293
B2	33	1230	2.92208	2.3248
B2	34	1230	3.02612	2.42907
B2	35	1230	3.0604	2.46358
B2	36	1230	3.09501	2.49843
B2	37	1230	3.11693	2.52058
B2	38	1230	3.10827	2.51215
B2	39	1230	3.11979	2.5239
B2	40	1230	3.12368	2.52802
B3	1	1230	0.478381	-0.0501664
B3	2	1230	0.502821	-0.027973
B3	3	1230	0.513909	-0.0191316
B3	4	1230	0.529049	-0.00623838
B3	5	1230	0.537892	0.000357206
B3	6	1230	0.548773	0.00899222
B3	7	1230	0.554142	0.0121145
B3	8	1230	0.554522	0.0102477
B3	9	1230	0.550335	0.00381369
B3	10	1230	0.55247	0.00370137
B3	11	1230	0.55178	0.000764922
B3	12	1230	0.555261	0.00199943
B3	13	1230	0.552967	-0.00254176
B3	14	1230	0.55377	-0.00398547
B3	15	1230	0.55358	-0.00642231
B3	16	1230	0.558577	-0.00367152
B3	17	1230	0.563405	-0.00109049
B3	18	1230	0.573533	0.00679113
B3	19	1230	0.589029	0.0200395
B3	20	1230	0.62932	0.0580844
B3	21	1230	0.704835	0.131352
B3	22	1230	0.841604	0.265874
B3	23	1230	1.06248	0.4845
B3	24	1230	1.39527	0.815047
B3	25	1230	1.79578	1.21331
B3	26	1230	2.19035	1.60564
B3	27	1230	2.51786	1.9309
B3	28	1230	2.74807	2.15886
B3	29	1230	2.92324	2.33178
B3	30	1230	3.0538	2.4601
B3	31	1230	3.12212	2.52617
B3	32	1230	3.1729	2.5747
B3	33	1230	3.18334	2.5829
B3	34	1230	3.19525	2.59256
B3	35	1230	3.19355	2.58861
B3	36	1230	3.20522	2.59804
B3	37	1230	3.19704	2.5876
B3	38	1230	3.20431	2.59263
B3	39	1230	3.2024	2.58848
B3	40	1230	3.19437	2.5782
B4	1	1230	0.522406	-0.0364688
B4	2	1230	0.537067	-0.0243267
B4	3	1230	0.547116	-0.0167954
B4	4	1230	0.56154	-0.00489
B4	5	1230	0.570288	0.0013404
B4	6	1230	0.575837	0.0043705
B4	7	1230	0.584204	0.0102195
B4	8	1230	0.587608	0.011105
B4	9	1230	0.582635	0.00361394
B4	10	1230	0.588941	0.00740186
B4	11	1230	0.58641	0.00235267
B4	12	1230	0.584048	-0.00252747
B4	13	1230	0.582783	-0.0063109
B4	14	1230	0.586818	-0.00479404
B4	15	1230	0.589044	-0.00508606
B4	16	1230	0.592975	-0.00367273
B4	17	1230	0.605894	0.00672719
B4	18	1230	0.62782	0.0261355
B4	19	1230	0.677294	0.0730908
B4	20	1230	0.75985	0.153129
B4	21	1230	0.908651	0.299412
B4	22	1230	1.16237	0.550612
B4	23	1230	1.52596	0.911683
B4	24	1230	1.95684	1.34005
B4	25	1230	2.348	1.72869
B4	26	1230	2.6717	2.04987
B4	27	1230	2.90351	2.27916
B4	28	1230	3.06527	2.43841
B4	29	1230	3.17915	2.54976
B4	30	1230	3.24572	2.61382
B4	31	1230	3.26905	2.63463
B4	32	1230	3.29001	2.65307
B4	33	1230	3.29158	2.65212
B4	34	1230	3.29378	2.65181
B4	35	1230	3.29958	2.65509
B4	36	1230	3.30414	2.65712
B4	37	1230	3.29772	2.64819
B4	38	1230	3.2953	2.64326
B4	39	1230	3.30694	2.65237
B4	40	1230	3.30823	2.65114
B5	1	1230	0.526586	-0.0159024
B5	2	1230	0.537024	-0.00560189
B5	3	1230	0.54296	0.000196304
B5	4	1230	0.543834	0.000932808
B5	5	1230	0.544665	0.00162604
B5	6	1230	0.541092	-0.00208396
B5	7	1230	0.543479	0.000165604
B5	8	1230	0.545055	0.00160395
B5	9	1230	0.541786	-0.0018029
B5	10	1230	0.544139	0.000412275
B5	11	1230	0.542576	-0.0012878
B5	12	1230	0.545161	0.00115966
B5	13	1230	0.543436	-0.000703736
B5	14	1230	0.543128	-0.00114901
B5	15	1230	0.543258	-0.00115691
B5	16	1230	0.542909	-0.00164266
B5	17	1230	0.544549	-0.000140595
B5	18	1230	0.548698	0.00387095
B5	19	1230	0.551275	0.00630976
B5	20	1230	0.561278	0.0161758
B5	21	1230	0.574519	0.0292789
B5	22	1230	0.608324	0.0629464
B5	23	1230	0.675648	0.130133
B5	24	1230	0.798733	0.25308
B5	25	1230	1.00403	0.458244
B5	26	1230	1.32831	0.782382
B5	27	1230	1.74821	1.20215
B5	28	1230	2.18526	1.63906
B5	29	1230	2.55782	2.01148
B5	30	1230	2.83839	2.29191
B5	31	1230	3.03787	2.49126
B5	32	1230	3.17972	2.63297
B5	33	1230	3.2791	2.73221
B5	34	1230	3.32947	2.78244
B5	35	1230	3.35297	2.8058
B5	36	1230	3.36406	2.81676
B5	37	1230	3.35882	2.81138
B5	38	1230	3.35647	2.80889
B5	39	1230	3.37105	2.82334
B5	40	1230	3.36076	2.81291
B6	1	1230	0.526237	-0.0162414
B6	2	1230	0.53579	-0.00698156
B6	3	1230	0.543252	0.000187064
B6	4	1230	0.541298	-0.00205976
B6	5	1230	0.544909	0.00125864
B6	6	1230	0.546829	0.00288474
B6	7	1230	0.547512	0.00327483
B6	8	1230	0.541831	-0.00269914
B6	9	1230	0.544791	-3.16213e-05
B6	10	1230	0.542506	-0.00261015
B6	11	1230	0.546418	0.00100902
B6	12	1230	0.546263	0.000561179
B6	13	1230	0.544157	-0.001838
B6	14	1230	0.542806	-0.00348133
B6	15	1230	0.545977	-0.000603643
B6	16	1230	0.547795	0.000921194
B6	17	1230	0.547006	-0.000160779
B6	18	1230	0.550847	0.00338775
B6	19	1230	0.557475	0.00972275
B6	20	1230	0.572407	0.0243616
B6	21	1230	0.597495	0.0491563
B6	22	1230	0.654234	0.105603
B6	23	1230	0.749067	0.200142
B6	24	1230	0.921333	0.372116
B6	25	1230	1.21098	0.661471
B6	26	1230	1.59186	1.04206
B6	27	1230	2.03267	1.48257
B6	28	1230	2.41711	1.86672
B6	29	1230	2.73195	2.18127
B6	30	1230	2.95558	2.4046
B6	31	1230	3.10562	2.55435
B6	32	1230	3.21016	2.6586
B6	33	1230	3.26981	2.71796
B6	34	1230	3.3098	2.75765
B6	35	1230	3.31357	2.76113
B6	36	1230	3.3205	2.76776
B6	37	1230	3.32079	2.76776
B6	38	1230	3.32013	2.76681
B6	39	1230	3.32713	2.77351
B6	40	1230	3.31946	2.76555
B7	1	1230	0.520031	-0.0314326
B7	2	1230	0.536615	-0.015132
B7	3	1230	0.541931	-0.0100994
B7	4	1230	0.546712	-0.00560236
B7	5	1230	0.557674	0.00507625
B7	6	1230	0.560627	0.00774662
B7	7	1230	0.557744	0.00458008
B7	8	1230	0.556125	0.00267758
B7	9	1230	0.553417	-0.000314317
B7	10	1230	0.55487	0.000855442
B7	11	1230	0.556225	0.00192739
B7	12	1230	0.553484	-0.00109705
B7	13	1230	0.552305	-0.00255937
B7	14	1230	0.556049	0.000901054
B7	15	1230	0.5557	0.000268489
B7	16	1230	0.551354	-0.00436045
B7	17	1230	0.558331	0.00233281
B7	18	1230	0.571162	0.0148802
B7	19	1230	0.588568	0.032003
B7	20	1230	0.626549	0.0697011
B7	21	1230	0.700838	0.143706
B7	22	1230	0.832526	0.275111
B7	23	1230	1.06507	0.507366
B7	24	1230	1.42006	0.862078
B7	25	1230	1.86136	1.3031
B7	26	1230	2.31247	1.75392
B7	27	1230	2.68358	2.12475
B7	28	1230	2.95062	2.3915
B7	29	1230	3.13881	2.57941
B7	30	1230	3.27568	2.716
B7	31	1230	3.34931	2.78935
B7	32	1230	3.3987	2.83845
B7	33	1230	3.41241	2.85188
B7	34	1230	3.40946	2.84864
B7	35	1230	3.41422	2.85312
B7	36	1230	3.41869	2.85731
B7	37	1230	3.42096	2.85929
B7	38	1230	3.42245	2.8605
B7	39	1230	3.42013	2.8579
B7	40	1230	3.42337	2.86085
B8	1	1230	0.508775	-0.0310289
B8	2	1230	0.521398	-0.018842
B8	3	1230	0.529305	-0.0113716
B8	4	1230	0.539568	-0.00154454
B8	5	1230	0.542236	0.000687378
B8	6	1230	0.54683	0.00484566
B8	7	1230	0.549243	0.00682182
B8	8	1230	0.544848	0.00199131
B8	9	1230	0.545796	0.00250316
B8	10	1230	0.546828	0.00309827
B8	11	1230	0.543699	-0.000466834
B8	12	1230	0.545177	0.000575199
B8	13	1230	0.5432	-0.00183745
B8	14	1230	0.546346	0.000872498
B8	15	1230	0.54399	-0.00192049
B8	16	1230	0.544722	-0.00162435
B8	17	1230	0.544152	-0.00263003
B8	18	1230	0.552267	0.00504802
B8	19	1230	0.563303	0.0156482
B8	20	1230	0.583949	0.0358578
B8	21	1230	0.622709	0.0741815
B8	22	1230	0.702528	0.153564
B8	23	1230	0.845011	0.295612
B8	24	1230	1.09178	0.541941
B8	25	1230	1.44552	0.895252
B8	26	1230	1.88119	1.33048
B8	27	1230	2.30291	1.75177
B8	28	1230	2.64859	2.09701
B8	29	1230	2.89925	2.34724
B8	30	1230	3.08145	2.529
B8	31	1230	3.19662	2.64373
B8	32	1230	3.27777	2.72444
B8	33	1230	3.30729	2.75353
B8	34	1230	3.33616	2.78196
B8	35	1230	3.33313	2.77849
B8	36	1230	3.33915	2.78408
B8	37	1230	3.34126	2.78575
B8	38	1230	3.34689	2.79095
B8	39	1230	3.34401	2.78763
B8	40	1230	3.35182	2.795
B9	1	1230	0.505409	-0.0318294
B9	2	1230	0.515827	-0.0217568
B9	3	1230	0.528696	-0.0092339
B9	4	1230	0.535988	-0.00228728
B9	5	1230	0.543649	0.00502836
B9	6	1230	0.547217	0.00825112
B9	7	1230	0.544075	0.00476288
B9	8	1230	0.540403	0.000745773
B9	9	1230	0.539553	-0.000450073
B9	10	1230	0.540097	-0.000251349
B9	11	1230	0.537679	-0.0030148
B9	12	1230	0.538051	-0.00298887
B9	13	1230	0.541987	0.000601481
B9	14	1230	0.537638	-0.00409292
B9	15	1230	0.542584	0.000507251
B9	16	1230	0.543239	0.000817257
B9	17	1230	0.544373	0.00160505
B9	18	1230	0.549347	0.00623383
B9	19	1230	0.563513	0.0200541
B9	20	1230	0.587705	0.0439008
B9	21	1230	0.637565	0.0934151
B9	22	1230	0.727567	0.183072
B9	23	1230	0.885255	0.340413
B9	24	1230	1.15656	0.611378
B9	25	1230	1.54217	0.996635
B9	26	1230	1.98532	1.43945
B9	27	1230	2.39947	1.85325
B9	28	1230	2.71892	2.17235
B9	29	1230	2.94277	2.39586
B9	30	1230	3.11042	2.56316
B9	31	1230	3.21059	2.66299
B9	32	1230	3.27248	2.72453
B9	33	1230	3.31199	2.76369
B9	34	1230	3.32333	2.77469
B9	35	1230	3.32658	2.7776
B9	36	1230	3.33914	2.78981
B9	37	1230	3.33253	2.78285
B9	38	1230	3.33933	2.7893
B9	39	1230	3.33588	2.78551
B9	40	1230	3.34546	2.79474
B10	1	1230	0.51763	-0.0168934
B10	2	1230	0.531331	-0.00281558
B10	3	1230	0.534472	0.000701508
B10	4	1230	0.53677	0.00337674
B10	5	1230	0.533091	7.40439e-05
B10	6	1230	0.532025	-0.000614989
B10	7	1230	0.534475	0.00221152
B10	8	1230	0.530209	-0.00167715
B10	9	1230	0.529733	-0.00177657
B10	10	1230	0.531019	-0.000113368
B10	11	1230	0.532098	0.00134211
B10	12	1230	0.527534	-0.00284523
B10	13	1230	0.527056	-0.00294668
B10	14	1230	0.527455	-0.00217034
B10	15	1230	0.526287	-0.00296225
B10	16	1230	0.529264	0.00039218
B10	17	1230	0.530922	0.00242613
B10	18	1230	0.52743	-0.000688816
B10	19	1230	0.533013	0.00527117
B10	20	1230	0.536682	0.00931683
B10	21	1230	0.554717	0.0277283
B10	22	1230	0.582143	0.0555316
B10	23	1230	0.639803	0.113568
B10	24	1230	0.746835	0.220977
B10	25	1230	0.932802	0.407321
B10	26	1230	1.23909	0.713983
B10	27	1230	1.66225	1.13752
B10	28	1230	2.11475	1.5904
B10	29	1230	2.51378	1.98981
B10	30	1230	2.81827	2.29467
B10	31	1230	3.02212	2.4989
B10	32	1230	3.15734	2.6345
B10	33	1230	3.24997	2.7275
B10	34	1230	3.30203	2.77994
B10	35	1230	3.33032	2.80861
B10	36	1230	3.32889	2.80756
B10	37	1230	3.34074	2.81978
B10	38	1230	3.33965	2.81907
B10	39	1230	3.34956	2.82935
B10	40	1230	3.3385	2.81867
B11	1	1230	0.546442	-0.0100084
B11	2	1230	0.551452	-0.00430444
B11	3	1230	0.554898	-0.000164995
B11	4	1230	0.554428	5.84849e-05
B11	5	1230	0.557221	0.00354508
B11	6	1230	0.552051	-0.000930611
B11	7	1230	0.552127	-0.000161629
B11	8	1230	0.554978	0.00338284
B11	9	1230	0.547516	-0.00338489
B11	10	1230	0.550175	-3.21627e-05
B11	11	1230	0.547706	-0.00180776
B11	12	1230	0.550527	0.00170703
B11	13	1230	0.543758	-0.00436845
B11	14	1230	0.543985	-0.00344844
B11	15	1230	0.546173	-0.000566469
B11	16	1230	0.54503	-0.00101616
B11	17	1230	0.55254	0.00718814
B11	18	1230	0.555952	0.011294
B11	19	1230	0.575969	0.0320043
B11	20	1230	0.603333	0.0600617
B11	21	1230	0.667766	0.125189
B11	22	1230	0.78281	0.240926
B11	23	1230	0.990573	0.449383
B11	24	1230	1.31689	0.776397
B11	25	1230	1.74702	1.20722
B11	26	1230	2.19947	1.66036
B11	27	1230	2.58661	2.04819
B11	28	1230	2.87665	2.33893
B11	29	1230	3.07929	2.54226
B11	30	1230	3.21042	2.67408
B11	31	1230	3.31005	2.77441
B11	32	1230	3.35965	2.8247
B11	33	1230	3.38437	2.85012
B11	34	1230	3.3982	2.86464
B11	35	1230	3.39344	2.86057
B11	36	1230	3.38972	2.85755
B11	37	1230	3.39595	2.86447
B11	38	1230	3.38809	2.85731
B11	39	1230	3.39579	2.8657
B11	40	1230	3.3952	2.8658
B12	1	1230	0.491059	-0.0105882
B12	2	1230	0.499348	-0.00235162
B12	3	1230	0.505274	0.00352132
B12	4	1230	0.50333	0.00152508
B12	5	1230	0.500473	-0.00138479
B12	6	1230	0.5046	0.00269006
B12	7	1230	0.502062	9.96178e-05
B12	8	1230	0.501542	-0.000473804
B12	9	1230	0.505363	0.00329527
B12	10	1230	0.498623	-0.00349766
B12	11	1230	0.494894	-0.00727974
B12	12	1230	0.500137	-0.00208907
B12	13	1230	0.501713	-0.000565719
B12	14	1230	0.500139	-0.00219265
B12	15	1230	0.503243	0.000858664
B12	16	1230	0.498285	-0.00415206
B12	17	1230	0.50286	0.000370273
B12	18	1230	0.505784	0.00324152
B12	19	1230	0.508628	0.00603368
B12	20	1230	0.517677	0.0150294
B12	21	1230	0.530269	0.027569
B12	22	1230	0.574407	0.0716545
B12	23	1230	0.649433	0.146628
B12	24	1230	0.784113	0.281255
B12	25	1230	1.01736	0.514449
B12	26	1230	1.37038	0.86742
B12	27	1230	1.80078	1.29776
B12	28	1230	2.22683	1.72376
B12	29	1230	2.57106	2.06793
B12	30	1230	2.82468	2.32151
B12	31	1230	2.99037	2.48714
B12	32	1230	3.11067	2.60739
B12	33	1230	3.18497	2.68164
B12	34	1230	3.22496	2.72157
B12	35	1230	3.24345	2.74002
B12	36	1230	3.24302	2.73953
B12	37	1230	3.25167	2.74813
B12	38	1230	3.23971	2.73612
B12	39	1230	3.23692	2.73327
B12	40	1230	3.24325	2.73955
C1	1	1095	0.259312	-0.0169175
C1	2	1095	0.26699	-0.0104125
C1	3	1095	0.276005	-0.00256981
C1	4	1095	0.279175	-0.000571893
C1	5	1095	0.280135	-0.000785068
C1	6	1095	0.286044	0.00395151
C1	7	1095	0.286826	0.00356136
C1	8	1095	0.284461	2.43364e-05
C1	9	1095	0.286202	0.000591982
C1	10	1095	0.287535	0.000752737
C1	11	1095	0.285668	-0.00228689
C1	12	1095	0.288567	-0.000560381
C1	13	1095	0.288902	-0.00139768
C1	14	1095	0.28895	-0.00252152
C1	15	1095	0.291712	-0.000932638
C1	16	1095	0.292917	-0.000900272
C1	17	1095	0.296757	0.00176757
C1	18	1095	0.295888	-0.000274093
C1	19	1095	0.299485	0.00215074
C1	20	1095	0.306399	0.0078921
C1	21	1095	0.325926	0.0262468
C1	22	1095	0.353642	0.0527908
C1	23	1095	0.401209	0.0991854
C1	24	1095	0.501601	0.198405
C1	25	1095	0.68216	0.377791
C1	26	1095	0.981353	0.675811
C1	27	1095	1.40745	1.10073
C1	28	1095	1.90233	1.59444
C1	29	1095	2.34804	2.03898
C1	30	1095	2.70792	2.39769
C1	31	1095	2.92911	2.6177
C1	32	1095	3.0858	2.77323
C1	33	1095	3.19261	2.87886
C1	34	1095	3.26417	2.94925
C1	35	1095	3.32142	3.00533
C1	36	1095	3.33644	3.01918
C1	37	1095	3.36381	3.04537
C1	38	1095	3.3828	3.06319
C1	39	1095	3.3837	3.06291
C1	40	1095	3.38049	3.05853
C2	1	1095	0.425053	-0.0200331
C2	2	1095	0.432778	-0.0154302
C2	3	1095	0.439628	-0.0117027
C2	4	1095	0.443755	-0.0106972
C2	5	1095	0.452558	-0.00501652
C2	6	1095	0.461478	0.000781694
C2	7	1095	0.472765	0.008946
C2	8	1095	0.477976	0.0110345
C2	9	1095	0.480163	0.0100996
C2	10	1095	0.482041	0.00885594
C2	11	1095	0.481363	0.00505522
C2	12	1095	0.481298	0.00186794
C2	13	1095	0.484037	0.00148527
C2	14	1095	0.484114	-0.00156015
C2	15	1095	0.483753	-0.00504295
C2	16	1095	0.484016	-0.00790225
C2	17	1095	0.488836	-0.00620427
C2	18	1095	0.49412	-0.00404248
C2	19	1095	0.508597	0.00731262
C2	20	1095	0.526508	0.0221014
C2	21	1095	0.569876	0.062347
C2	22	1095	0.65172	0.141069
C2	23	1095	0.804206	0.290432
C2	24	1095	1.0549	0.538005
C2	25	1095	1.4422	0.922184
C2	26	1095	1.91908	1.39594
C2	27	1095	2.38448	1.85822
C2	28	1095	2.74018	2.21079
C2	29	1095	2.97519	2.44268
C2	30	1095	3.13491	2.59928
C2	31	1095	3.23529	2.69654
C2	32	1095	3.31602	2.77415
C2	33	1095	3.35306	2.80806
C2	34	1095	3.37636	2.82824
C2	35	1095	3.3777	2.82647
C2	36	1095	3.39445	2.84009
C2	37	1095	3.40182	2.84434
C2	38	1095	3.39609	2.83549
C2	39	1095	3.39604	2.83231
C2	40	1095	3.39287	2.82602
C3	1	1095	0.351805	-0.0247384
C3	2	1095	0.36329	-0.0166218
C3	3	1095	0.372728	-0.0105531
C3	4	1095	0.37812	-0.00853056
C3	5	1095	0.384408	-0.00561217
C3	6	1095	0.392535	-0.00085432
C3	7	1095	0.398744	0.00198503
C3	8	1095	0.409229	0.00910087
C3	9	1095	0.413879	0.0103818
C3	10	1095	0.420957	0.0140899
C3	11	1095	0.414364	0.00412807
C3	12	1095	0.417093	0.00348812
C3	13	1095	0.420866	0.00389102
C3	14	1095	0.419381	-0.00096319
C3	15	1095	0.422797	-0.000916106
C3	16	1095	0.419962	-0.00712089
C3	17	1095	0.423949	-0.00650327
C3	18	1095	0.42781	-0.00601127
C3	19	1095	0.430898	-0.00629234
C3	20	1095	0.441972	0.0014123
C3	21	1095	0.469506	0.0255767
C3	22	1095	0.511083	0.0637844
C3	23	1095	0.597438	0.14677
C3	24	1095	0.748094	0.294057
C3	25	1095	1.00616	0.548756
C3	26	1095	1.39835	0.937575
C3	27	1095	1.88488	1.42074
C3	28	1095	2.34036	1.87285
C3	29	1095	2.6877	2.21681
C3	30	1095	2.93312	2.45886
C3	31	1095	3.08226	2.60464
C3	32	1095	3.18472	2.70373
C3	33	1095	3.25184	2.76748
C3	34	1095	3.28858	2.80085
C3	35	1095	3.30594	2.81484
C3	36	1095	3.31744	2.82297
C3	37	1095	3.33121	2.83337
C3	38	1095	3.32917	2.82796
C3	39	1095	3.33539	2.83081
C3	40	1095	3.32227	2.81432
C4	1	1095	0.413181	-0.0252082
C4	2	1095	0.426726	-0.0143669
C4	3	1095	0.430412	-0.0133856
C4	4	1095	0.435997	-0.0105038
C4	5	1095	0.448891	-0.000314503
C4	6	1095	0.451473	-0.000436024
C4	7	1095	0.459841	0.00522822
C4	8	1095	0.470172	0.0128554
C4	9	1095	0.467827	0.00780564
C4	10	1095	0.470412	0.00768665
C4	11	1095	0.473152	0.00772335
C4	12	1095	0.474852	0.00671855
C4	13	1095	0.471553	0.000716374
C4	14	1095	0.468691	-0.00485021
C4	15	1095	0.470028	-0.00621714
C4	16	1095	0.471422	-0.00752736
C4	17	1095	0.476153	-0.0054995
C4	18	1095	0.481405	-0.00295226
C4	19	1095	0.494869	0.00780794
C4	20	1095	0.51905	0.0292852
C4	21	1095	0.572039	0.0795704
C4	22	1095	0.668827	0.173654
C4	23	1095	0.83489	0.337013
C4	24	1095	1.13508	0.634502
C4	25	1095	1.57438	1.0711
C4	26	1095	2.11679	1.6108
C4	27	1095	2.64098	2.13229
C4	28	1095	3.04354	2.53215
C4	29	1095	3.3136	2.7995
C4	30	1095	3.51635	2.99954
C4	31	1095	3.62377	3.10427
C4	32	1095	3.72528	3.20307
C4	33	1095	3.78291	3.258
C4	34	1095	3.79992	3.2723
C4	35	1095	3.83005	3.29972
C4	36	1095	3.83574	3.30271
C4	37	1095	3.83698	3.30125
C4	38	1095	3.8501	3.31166
C4	39	1095	3.85924	3.3181
C4	40	1095	3.84852	3.30467
C5	1	1095	0.432943	-0.0236977
C5	2	1095	0.44421	-0.0131947
C5	3	1095	0.454529	-0.00364019
C5	4	1095	0.459302	0.00036969
C5	5	1095	0.463054	0.00335717
C5	6	1095	0.461783	0.00132245
C5	7	1095	0.46435	0.0031255
C5	8	1095	0.462272	0.000283104
C5	9	1095	0.462168	-0.00058399
C5	10	1095	0.462447	-0.00106896
C5	11	1095	0.462894	-0.00138656
C5	12	1095	0.465017	-2.74174e-05
C5	13	1095	0.466039	0.000230318
C5	14	1095	0.465834	-0.000738044
C5	15	1095	0.466431	-0.000904962
C5	16	1095	0.466279	-0.00182126
C5	17	1095	0.465501	-0.00336335
C5	18	1095	0.468175	-0.00145289
C5	19	1095	0.470893	0.00050116
C5	20	1095	0.476954	0.00579823
C5	21	1095	0.486557	0.0146376
C5	22	1095	0.506725	0.0340412
C5	23	1095	0.551322	0.077874
C5	24	1095	0.632506	0.158295
C5	25	1095	0.782383	0.307407
C5	26	1095	1.04641	0.570668
C5	27	1095	1.4761	0.999597
C5	28	1095	2.01526	1.53799
C5	29	1095	2.55059	2.07255
C5	30	1095	2.98681	2.50801
C5	31	1095	3.32644	2.84688
C5	32	1095	3.54792	3.0676
C5	33	1095	3.68893	3.20784
C5	34	1095	3.79212	3.31027
C5	35	1095	3.85904	3.37643
C5	36	1095	3.90031	3.41693
C5	37	1095	3.93267	3.44853
C5	38	1095	3.95184	3.46693
C5	39	1095	3.9656	3.47993
C5	40	1095	3.97407	3.48764
C6	1	1095	0.437515	-0.0379831
C6	2	1095	0.4627	-0.0129836
C6	3	1095	0.474808	-0.0010608
C6	4	1095	0.4714	-0.00465345
C6	5	1095	0.479491	0.00325166
C6	6	1095	0.480387	0.00396234
C6	7	1095	0.475782	-0.000827481
C6	8	1095	0.477071	0.0002765
C6	9	1095	0.479149	0.00216908
C6	10	1095	0.475643	-0.00152279
C6	11	1095	0.478229	0.000878784
C6	12	1095	0.478619	0.00108339
C6	13	1095	0.47449	-0.0032315
C6	14	1095	0.47734	-0.000565993
C6	15	1095	0.475889	-0.00220269
C6	16	1095	0.47845	0.000173339
C6	17	1095	0.480732	0.00226962
C6	18	1095	0.484549	0.0059017
C6	19	1095	0.495514	0.0166809
C6	20	1095	0.51397	0.0349523
C6	21	1095	0.547958	0.068755
C6	22	1095	0.622378	0.142989
C6	23	1095	0.754633	0.275059
C6	24	1095	0.990466	0.510706
C6	25	1095	1.37071	0.890764
C6	26	1095	1.89379	1.41366
C6	27	1095	2.44722	1.96691
C6	28	1095	2.92805	2.44755
C6	29	1095	3.27551	2.79482
C6	30	1095	3.50438	3.02351
C6	31	1095	3.65231	3.17126
C6	32	1095	3.7424	3.26116
C6	33	1095	3.81251	3.33108
C6	34	1095	3.85549	3.37388
C6	35	1095	3.88533	3.40353
C6	36	1095	3.89267	3.41069
C6	37	1095	3.9014	3.41923
C6	38	1095	3.91598	3.43363
C6	39	1095	3.92065	3.43811
C6	40	1095	3.91893	3.4362
C7	1	1095	0.419069	-0.0386498
C7	2	1095	0.433421	-0.026272
C7	3	1095	0.449042	-0.0126253
C7	4	1095	0.460148	-0.0034938
C7	5	1095	0.469293	0.00367735
C7	6	1095	0.473307	0.005717
C7	7	1095	0.475891	0.00632658
C7	8	1095	0.475094	0.00355523
C7	9	1095	0.478465	0.00495227
C7	10	1095	0.477727	0.00223922
C7	11	1095	0.479736	0.0022743
C7	12	1095	0.47543	-0.00400633
C7	13	1095	0.477879	-0.0035316
C7	14	1095	0.47867	-0.00471511
C7	15	1095	0.484989	-0.000369812
C7	16	1095	0.486792	-0.000541829
C7	17	1095	0.497974	0.00866614
C7	18	1095	0.515593	0.0243109
C7	19	1095	0.551089	0.0578322
C7	20	1095	0.615046	0.119815
C7	21	1095	0.733128	0.235923
C7	22	1095	0.942573	0.443394
C7	23	1095	1.27798	0.776827
C7	24	1095	1.77172	1.26859
C7	25	1095	2.31929	1.81419
C7	26	1095	2.84119	2.33411
C7	27	1095	3.23015	2.7211
C7	28	1095	3.50089	2.98987
C7	29	1095	3.67144	3.15844
C7	30	1095	3.7907	3.27573
C7	31	1095	3.86746	3.35051
C7	32	1095	3.9183	3.39938
C7	33	1095	3.94001	3.41912
C7	34	1095	3.95274	3.42987
C7	35	1095	3.97384	3.449
C7	36	1095	3.97598	3.44916
C7	37	1095	3.97117	3.44237
C7	38	1095	3.97011	3.43934
C7	39	1095	3.96451	3.43176
C7	40	1095	3.98389	3.44918
C8	1	1095	0.430195	-0.0245305
C8	2	1095	0.433904	-0.0214732
C8	3	1095	0.443401	-0.0126293
C8	4	1095	0.449311	-0.00737088
C8	5	1095	0.462916	0.00558124
C8	6	1095	0.462754	0.00476675
C8	7	1095	0.463953	0.00531374
C8	8	1095	0.463528	0.00423639
C8	9	1095	0.463937	0.00399314
C8	10	1095	0.463237	0.0026414
C8	11	1095	0.46396	0.00271194
C8	12	1095	0.462829	0.00092872
C8	13	1095	0.463615	0.00106232
C8	14	1095	0.462896	-0.000309088
C8	15	1095	0.46031	-0.00354812
C8	16	1095	0.461622	-0.00288815
C8	17	1095	0.459662	-0.00550002
C8	18	1095	0.465104	-0.000710104
C8	19	1095	0.468187	0.00172004
C8	20	1095	0.47241	0.0052911
C8	21	1095	0.485646	0.0178743
C8	22	1095	0.509198	0.0407737
C8	23	1095	0.556521	0.0874453
C8	24	1095	0.644611	0.174883
C8	25	1095	0.794193	0.323812
C8	26	1095	1.05005	0.57902
C8	27	1095	1.43717	0.96548
C8	28	1095	1.93379	1.46145
C8	29	1095	2.43614	1.96315
C8	30	1095	2.88532	2.41168
C8	31	1095	3.21594	2.74165
C8	32	1095	3.43983	2.96488
C8	33	1095	3.60217	3.12657
C8	34	1095	3.71786	3.24161
C8	35	1095	3.79658	3.31967
C8	36	1095	3.84349	3.36593
C8	37	1095	3.88817	3.40996
C8	38	1095	3.90364	3.42478
C8	39	1095	3.91447	3.43496
C8	40	1095	3.92868	3.44851
C9	1	1095	0.452189	-0.00907824
C9	2	1095	0.458218	-0.00302075
C9	3	1095	0.46098	-0.000230729
C9	4	1095	0.459257	-0.001925
C9	5	1095	0.460773	-0.000381257
C9	6	1095	0.460456	-0.000669876
C9	7	1095	0.46557	0.00447226
C9	8	1095	0.460024	-0.00104532
C9	9	1095	0.460799	-0.000242252
C9	10	1095	0.461767	0.000753788
C9	11	1095	0.460963	-2.17112e-05
C9	12	1095	0.460669	-0.000287412
C9	13	1095	0.463307	0.00237941
C9	14	1095	0.459542	-0.00135758
C9	15	1095	0.460622	-0.000249066
C9	16	1095	0.45901	-0.00183367
C9	17	1095	0.461453	0.000638421
C9	18	1095	0.470153	0.00936617
C9	19	1095	0.480642	0.0198836
C9	20	1095	0.495841	0.0351105
C9	21	1095	0.53243	0.0717278
C9	22	1095	0.606289	0.145616
C9	23	1095	0.729759	0.269113
C9	24	1095	0.953188	0.492571
C9	25	1095	1.31264	0.852049
C9	26	1095	1.81063	1.35007
C9	27	1095	2.37378	1.91325
C9	28	1095	2.87658	2.41608
C9	29	1095	3.23799	2.77752
C9	30	1095	3.51198	3.05153
C9	31	1095	3.67747	3.21705
C9	32	1095	3.803	3.34261
C9	33	1095	3.8861	3.42573
C9	34	1095	3.93368	3.47334
C9	35	1095	3.96187	3.50156
C9	36	1095	3.99083	3.53055
C9	37	1095	4.0005	3.54025
C9	38	1095	4.00469	3.54447
C9	39	1095	4.01362	3.55343
C9	40	1095	4.00732	3.54716
C10	1	1095	0.416078	-0.0361115
C10	2	1095	0.433238	-0.021649
C10	3	1095	0.437473	-0.0201104
C10	4	1095	0.448887	-0.0113941
C10	5	1095	0.45839	-0.00458846
C10	6	1095	0.469369	0.00369403
C10	7	1095	0.482469	0.014097
C10	8	1095	0.483185	0.0121162
C10	9	1095	0.481182	0.00741556
C10	10	1095	0.484243	0.00777933
C10	11	1095	0.485703	0.00654236
C10	12	1095	0.48626	0.00440298
C10	13	1095	0.487514	0.00295978
C10	14	1095	0.486126	-0.00112578
C10	15	1095	0.487138	-0.00281047
C10	16	1095	0.49045	-0.00219552
C10	17	1095	0.491511	-0.0038322
C10	18	1095	0.490526	-0.0075143
C10	19	1095	0.495301	-0.005436
C10	20	1095	0.499976	-0.00345831
C10	21	1095	0.511767	0.00563612
C10	22	1095	0.530262	0.021434
C10	23	1095	0.576002	0.0644766
C10	24	1095	0.65505	0.140828
C10	25	1095	0.803916	0.286996
C10	26	1095	1.05955	0.539936
C10	27	1095	1.46404	0.94173
C10	28	1095	1.98696	1.46195
C10	29	1095	2.53373	2.00603
C10	30	1095	3.00493	2.47453
C10	31	1095	3.31848	2.78537
C10	32	1095	3.52112	2.98532
C10	33	1095	3.67233	3.13384
C10	34	1095	3.76605	3.22486
C10	35	1095	3.82487	3.28098
C10	36	1095	3.87071	3.32412
C10	37	1095	3.8917	3.34242
C10	38	1095	3.90302	3.35104
C10	39	1095	3.92682	3.37214
C10	40	1095	3.91305	3.35567
C11	1	1095	0.43313	-0.0332521
C11	2	1095	0.448538	-0.0183809
C11	3	1095	0.464573	-0.00288361
C11	4	1095	0.46931	0.00131591
C11	5	1095	0.468637	0.00010526
C11	6	1095	0.470548	0.00147886
C11	7	1095	0.470746	0.00114023
C11	8	1095	0.472581	0.00243726
C11	9	1095	0.468574	-0.00210636
C11	10	1095	0.470135	-0.00108338
C11	11	1095	0.471891	0.000136018
C11	12	1095	0.473976	0.00168274
C11	13	1095	0.472558	-0.000272224
C11	14	1095	0.472751	-0.000616073
C11	15	1095	0.472811	-0.00109427
C11	16	1095	0.474387	-5.53217e-05
C11	17	1095	0.473587	-0.00139236
C11	18	1095	0.473286	-0.00223141
C11	19	1095	0.47692	0.000866018
C11	20	1095	0.479164	0.00257272
C11	21	1095	0.483382	0.00625266
C11	22	1095	0.494822	0.0171552
C11	23	1095	0.5132	0.0349959
C11	24	1095	0.552521	0.0737794
C11	25	1095	0.630248	0.15097
C11	26	1095	0.769414	0.289599
C11	27	1095	1.01311	0.532754
C11	28	1095	1.39262	0.911727
C11	29	1095	1.88161	1.40018
C11	30	1095	2.37027	1.8883
C11	31	1095	2.78063	2.29812
C11	32	1095	3.06106	2.57802
C11	33	1095	3.25552	2.77195
C11	34	1095	3.39603	2.91192
C11	35	1095	3.47777	2.99312
C11	36	1095	3.53944	3.05425
C11	37	1095	3.5816	3.09587
C11	38	1095	3.6042	3.11793
C11	39	1095	3.63892	3.15212
C11	40	1095	3.64192	3.15458
C12	1	1095	0.439771	-0.0200252
C12	2	1095	0.444078	-0.0168292
C12	3	1095	0.457174	-0.00484296
C12	4	1095	0.457697	-0.00543044
C12	5	1095	0.468474	0.0042362
C12	6	1095	0.468196	0.00284742
C12	7	1095	0.470772	0.00431404
C12	8	1095	0.468603	0.00103386
C12	9	1095	0.473596	0.00491652
C12	10	1095	0.469514	-0.000275274
C12	11	1095	0.471018	0.000118636
C12	12	1095	0.469167	-0.0028429
C12	13	1095	0.470651	-0.00246973
C12	14	1095	0.473372	-0.000858724
C12	15	1095	0.471863	-0.00347831
C12	16	1095	0.475757	-0.000694905
C12	17	1095	0.480988	0.00342656
C12	18	1095	0.485631	0.00695883
C12	19	1095	0.499999	0.0202165
C12	20	1095	0.531945	0.0510526
C12	21	1095	0.579374	0.0973713
C12	22	1095	0.66878	0.185666
C12	23	1095	0.819206	0.334982
C12	24	1095	1.0577	0.572363
C12	25	1095	1.40279	0.916344
C12	26	1095	1.83432	1.34676
C12	27	1095	2.2839	1.79523
C12	28	1095	2.6648	2.17503
C12	29	1095	2.94886	2.45797
C12	30	1095	3.13663	2.64464
C12	31	1095	3.28684	2.79374
C12	32	1095	3.3838	2.88958
C12	33	1095	3.46017	2.96484
C12	34	1095	3.4921	2.99567
C12	35	1095	3.50317	3.00563
C12	36	1095	3.5209	3.02224
C12	37	1095	3.53614	3.03637
C12	38	1095	3.53434	3.03346
C12	39	1095	3.53965	3.03766
C12	40	1095	3.55292	3.04982
D1	1	1095	0.421286	-0.0322727
D1	2	1095	0.432257	-0.0227929
D1	3	1095	0.443123	-0.0134187
D1	4	1095	0.457267	-0.000765305
D1	5	1095	0.466613	0.00708895
D1	6	1095	0.467656	0.00664033
D1	7	1095	0.46686	0.00435267
D1	8	1095	0.465123	0.00112472
D1	9	1095	0.467837	0.00234682
D1	10	1095	0.469208	0.00222665
D1	11	1095	0.465428	-0.00304532
D1	12	1095	0.468227	-0.00173813
D1	13	1095	0.469067	-0.00238946
D1	14	1095	0.471587	-0.00136072
D1	15	1095	0.470764	-0.00367532
D1	16	1095	0.475574	-0.000356685
D1	17	1095	0.480392	0.00296955
D1	18	1095	0.484593	0.00567917
D1	19	1095	0.501441	0.0210363
D1	20	1095	0.531405	0.0495086
D1	21	1095	0.586906	0.103518
D1	22	1095	0.685508	0.200629
D1	23	1095	0.868009	0.381638
D1	24	1095	1.16421	0.676352
D1	25	1095	1.58734	1.09799
D1	26	1095	2.08032	1.58948
D1	27	1095	2.51198	2.01964
D1	28	1095	2.84086	2.34703
D1	29	1095	3.0505	2.55518
D1	30	1095	3.18629	2.68948
D1	31	1095	3.29	2.7917
D1	32	1095	3.35241	2.85262
D1	33	1095	3.3806	2.87931
D1	34	1095	3.40688	2.9041
D1	35	1095	3.41827	2.914
D1	36	1095	3.42276	2.917
D1	37	1095	3.426	2.91875
D1	38	1095	3.42673	2.91798
D1	39	1095	3.42417	2.91394
D1	40	1095	3.42219	2.91046
D2	1	1095	0.424863	-0.0153709
D2	2	1095	0.438303	-0.00262549
D2	3	1095	0.43885	-0.00277347
D2	4	1095	0.44363	0.00131225
D2	5	1095	0.446026	0.00301365
D2	6	1095	0.443093	-0.000614338
D2	7	1095	0.446619	0.00221765
D2	8	1095	0.446967	0.00187087
D2	9	1095	0.446245	0.000453462
D2	10	1095	0.445705	-0.000780896
D2	11	1095	0.445657	-0.00152301
D2	12	1095	0.446581	-0.00129434
D2	13	1095	0.444595	-0.00397513
D2	14	1095	0.447125	-0.00213901
D2	15	1095	0.449514	-0.000444934
D2	16	1095	0.449183	-0.0014705
D2	17	1095	0.452971	0.00162292
D2	18	1095	0.456568	0.00452482
D2	19	1095	0.462176	0.00943854
D2	20	1095	0.472568	0.0191362
D2	21	1095	0.492461	0.0383341
D2	22	1095	0.531783	0.0769616
D2	23	1095	0.605232	0.149716
D2	24	1095	0.744701	0.28849
D2	25	1095	0.984624	0.527719
D2	26	1095	1.35183	0.894226
D2	27	1095	1.83202	1.37373
D2	28	1095	2.33115	1.87216
D2	29	1095	2.75737	2.29768
D2	30	1095	3.04293	2.58255
D2	31	1095	3.24024	2.77917
D2	32	1095	3.37078	2.90901
D2	33	1095	3.47093	3.00847
D2	34	1095	3.52378	3.06062
D2	35	1095	3.55534	3.09149
D2	36	1095	3.57667	3.11212
D2	37	1095	3.59608	3.13084
D2	38	1095	3.60265	3.13671
D2	39	1095	3.60505	3.13842
D2	40	1095	3.60098	3.13365
D3	1	1095	0.496855	-0.019033
D3	2	1095	0.508933	-0.00756122
D3	3	1095	0.514104	-0.00299719
D3	4	1095	0.517241	-0.000467047
D3	5	1095	0.520779	0.00246513
D3	6	1095	0.52148	0.00255875
D3	7	1095	0.519261	-0.000266341
D3	8	1095	0.521937	0.00180294
D3	9	1095	0.519508	-0.00123262
D3	10	1095	0.520663	-0.000684152
D3	11	1095	0.520411	-0.00154259
D3	12	1095	0.522088	-0.000472346
D3	13	1095	0.523977	0.000810272
D3	14	1095	0.525611	0.00183713
D3	15	1095	0.523997	-0.00038316
D3	16	1095	0.52453	-0.000456727
D3	17	1095	0.52288	-0.00271355
D3	18	1095	0.525162	-0.00103772
D3	19	1095	0.529586	0.00277923
D3	20	1095	0.533434	0.00602075
D3	21	1095	0.544308	0.0162879
D3	22	1095	0.564819	0.0361927
D3	23	1095	0.597353	0.0681195
D3	24	1095	0.669713	0.139873
D3	25	1095	0.80402	0.273574
D3	26	1095	1.03176	0.500704
D3	27	1095	1.40407	0.872412
D3	28	1095	1.8919	1.35963
D3	29	1095	2.412	1.87913
D3	30	1095	2.86024	2.32676
D3	31	1095	3.17011	2.63602
D3	32	1095	3.38851	2.85381
D3	33	1095	3.5364	3.0011
D3	34	1095	3.63988	3.10397
D3	35	1095	3.70128	3.16477
D3	36	1095	3.74454	3.20742
D3	37	1095	3.76751	3.22978
D3	38	1095	3.78031	3.24198
D3	39	1095	3.8007	3.26176
D3	40	1095	3.80847	3.26892
D4	1	1095	0.46646	-0.011384
D4	2	1095	0.47264	-0.00594304
D4	3	1095	0.478936	-0.000387386
D4	4	1095	0.480097	3.45197e-05
D4	5	1095	0.483879	0.00307709
D4	6	1095	0.479269	-0.0022727
D4	7	1095	0.482781	0.000499686
D4	8	1095	0.484233	0.00121243
D4	9	1095	0.481923	-0.00183787
D4	10	1095	0.48455	4.94738e-05
D4	11	1095	0.486114	0.000874694
D4	12	1095	0.486557	0.000578036
D4	13	1095	0.483349	-0.00336965
D4	14	1095	0.486359	-0.00109946
D4	15	1095	0.487939	-0.000259428
D4	16	1095	0.489592	0.000654603
D4	17	1095	0.491923	0.00224595
D4	18	1095	0.496643	0.00622625
D4	19	1095	0.512831	0.0216747
D4	20	1095	0.534414	0.0425186
D4	21	1095	0.584289	0.0916532
D4	22	1095	0.677016	0.183641
D4	23	1095	0.845428	0.351313
D4	24	1095	1.13496	0.640104
D4	25	1095	1.56338	1.06778
D4	26	1095	2.10561	1.60928
D4	27	1095	2.62438	2.1273
D4	28	1095	3.03375	2.53594
D4	29	1095	3.3084	2.80985
D4	30	1095	3.49603	2.99674
D4	31	1095	3.61947	3.11944
D4	32	1095	3.70317	3.2024
D4	33	1095	3.75583	3.25432
D4	34	1095	3.79104	3.28879
D4	35	1095	3.80086	3.29787
D4	36	1095	3.82232	3.31859
D4	37	1095	3.83361	3.32914
D4	38	1095	3.8346	3.32939
D4	39	1095	3.8413	3.33535
D4	40	1095	3.83697	3.33028
D5	1	1095	0.45018	-0.0130655
D5	2	1095	0.459177	-0.00485347
D5	3	1095	0.461455	-0.00336077
D5	4	1095	0.465808	0.000206823
D5	5	1095	0.467167	0.000780032
D5	6	1095	0.470863	0.00369082
D5	7	1095	0.470236	0.00227833
D5	8	1095	0.469189	0.000445653
D5	9	1095	0.469425	-0.000103523
D5	10	1095	0.470587	0.000272692
D5	11	1095	0.469875	-0.00122408
D5	12	1095	0.471872	-1.28621e-05
D5	13	1095	0.470939	-0.0017308
D5	14	1095	0.473664	0.00020867
D5	15	1095	0.468596	-0.00564434
D5	16	1095	0.472043	-0.00298344
D5	17	1095	0.477494	0.00168284
D5	18	1095	0.482091	0.00549396
D5	19	1095	0.485344	0.00796215
D5	20	1095	0.503448	0.0252798
D5	21	1095	0.531652	0.0526993
D5	22	1095	0.587892	0.108153
D5	23	1095	0.694833	0.21431
D5	24	1095	0.883667	0.402357
D5	25	1095	1.20049	0.71839
D5	26	1095	1.6738	1.19092
D5	27	1095	2.21478	1.73112
D5	28	1095	2.73301	2.24856
D5	29	1095	3.13996	2.65472
D5	30	1095	3.41147	2.92545
D5	31	1095	3.60027	3.11346
D5	32	1095	3.72476	3.23717
D5	33	1095	3.81225	3.32387
D5	34	1095	3.86422	3.37506
D5	35	1095	3.88818	3.39824
D5	36	1095	3.91401	3.42327
D5	37	1095	3.94071	3.44919
D5	38	1095	3.9405	3.44819
D5	39	1095	3.94222	3.44913
D5	40	1095	3.94382	3.44995
D6	1	1095	0.464156	-0.0172713
D6	2	1095	0.480451	-0.00176973
D6	3	1095	0.48001	-0.0030024
D6	4	1095	0.484752	0.000946568
D6	5	1095	0.484105	-0.000493108
D6	6	1095	0.488739	0.00334905
D6	7	1095	0.487214	0.00103137
D6	8	1095	0.48695	-2.57629e-05
D6	9	1095	0.491243	0.00347498
D6	10	1095	0.486864	-0.00169621
D6	11	1095	0.487262	-0.00209111
D6	12	1095	0.490237	9.1777e-05
D6	13	1095	0.489651	-0.00128692
D6	14	1095	0.490571	-0.00115953
D6	15	1095	0.490932	-0.00159058
D6	16	1095	0.490009	-0.003307
D6	17	1095	0.499867	0.00575888
D6	18	1095	0.508251	0.0133504
D6	19	1095	0.524261	0.0285675
D6	20	1095	0.554261	0.0577749
D6	21	1095	0.615773	0.118495
D6	22	1095	0.732469	0.234398
D6	23	1095	0.933655	0.434792
D6	24	1095	1.26317	0.76351
D6	25	1095	1.73267	1.23223
D6	26	1095	2.2847	1.78346
D6	27	1095	2.79623	2.2942
D6	28	1095	3.18044	2.67762
D6	29	1095	3.44885	2.94523
D6	30	1095	3.61904	3.11463
D6	31	1095	3.7243	3.21909
D6	32	1095	3.8129	3.3069
D6	33	1095	3.86193	3.35514
D6	34	1095	3.89071	3.38312
D6	35	1095	3.91165	3.40327
D6	36	1095	3.90439	3.39522
D6	37	1095	3.93774	3.42778
D6	38	1095	3.93013	3.41937
D6	39	1095	3.92417	3.41262
D6	40	1095	3.93314	3.4208
D7	1	1095	0.425293	-0.01283
D7	2	1095	0.435264	-0.00302324
D7	3	1095	0.438892	0.000439933
D7	4	1095	0.439818	0.00120165
D7	5	1095	0.439113	0.000332283
D7	6	1095	0.439395	0.000450477
D7	7	1095	0.441646	0.00253699
D7	8	1095	0.435753	-0.0035206
D7	9	1095	0.438446	-0.000991486
D7	10	1095	0.439464	-0.000137294
D7	11	1095	0.440386	0.000619563
D7	12	1095	0.437589	-0.00234088
D7	13	1095	0.437327	-0.00276795
D7	14	1095	0.440275	1.64768e-05
D7	15	1095	0.439757	-0.000666178
D7	16	1095	0.445415	0.00482701
D7	17	1095	0.451847	0.0110953
D7	18	1095	0.466712	0.0257959
D7	19	1095	0.491242	0.0501612
D7	20	1095	0.54963	0.108385
D7	21	1095	0.640989	0.19958
D7	22	1095	0.813156	0.371583
D7	23	1095	1.09448	0.652746
D7	24	1095	1.51302	1.07112
D7	25	1095	2.04262	1.60055
D7	26	1095	2.57493	2.1327
D7	27	1095	3.0217	2.5793
D7	28	1095	3.33182	2.88926
D7	29	1095	3.53447	3.09174
D7	30	1095	3.67915	3.23626
D7	31	1095	3.77195	3.3289
D7	32	1095	3.84086	3.39765
D7	33	1095	3.8631	3.41972
D7	34	1095	3.88929	3.44574
D7	35	1095	3.88945	3.44574
D7	36	1095	3.90323	3.45935
D7	37	1095	3.90245	3.45841
D7	38	1095	3.90829	3.46409
D7	39	1095	3.90036	3.45599
D7	40	1095	3.91089	3.46636
D8	1	1095	0.43109	-0.0191547
D8	2	1095	0.437532	-0.0139603
D8	3	1095	0.441714	-0.0110261
D8	4	1095	0.449942	-0.00404556
D8	5	1095	0.456255	0.00101936
D8	6	1095	0.458911	0.00242792
D8	7	1095	0.46361	0.00587887
D8	8	1095	0.46442	0.00544091
D8	9	1095	0.465928	0.00570136
D8	10	1095	0.466233	0.00475829
D8	11	1095	0.464334	0.00161174
D8	12	1095	0.462729	-0.00124074
D8	13	1095	0.46346	-0.00175774
D8	14	1095	0.463816	-0.00264908
D8	15	1095	0.4629	-0.0048134
D8	16	1095	0.470273	0.00131239
D8	17	1095	0.468758	-0.00145057
D8	18	1095	0.470288	-0.0011677
D8	19	1095	0.47425	0.00154648
D8	20	1095	0.485585	0.0116337
D8	21	1095	0.50936	0.034161
D8	22	1095	0.550774	0.074327
D8	23	1095	0.629127	0.151432
D8	24	1095	0.769464	0.290521
D8	25	1095	1.00402	0.523828
D8	26	1095	1.38077	0.899332
D8	27	1095	1.88349	1.40081
D8	28	1095	2.42717	1.94324
D8	29	1095	2.89719	2.41201
D8	30	1095	3.24761	2.76118
D8	31	1095	3.47727	2.98959
D8	32	1095	3.6431	3.15417
D8	33	1095	3.74398	3.25381
D8	34	1095	3.81883	3.32741
D8	35	1095	3.86649	3.37383
D8	36	1095	3.89709	3.40317
D8	37	1095	3.91684	3.42168
D8	38	1095	3.92228	3.42587
D8	39	1095	3.9293	3.43165
D8	40	1095	3.93158	3.43267
D9	1	1095	0.435166	-0.0140895
D9	2	1095	0.447783	-0.00174049
D9	3	1095	0.453499	0.00370769
D9	4	1095	0.450558	0.000499167
D9	5	1095	0.452182	0.00185487
D9	6	1095	0.449903	-0.000691451
D9	7	1095	0.451307	0.000444338
D9	8	1095	0.446818	-0.0043129
D9	9	1095	0.447597	-0.00380123
D9	10	1095	0.450996	-0.000670411
D9	11	1095	0.451791	-0.000143185
D9	12	1095	0.451549	-0.000652991
D9	13	1095	0.448858	-0.00361234
D9	14	1095	0.45298	0.000242613
D9	15	1095	0.460142	0.00713582
D9	16	1095	0.463821	0.0105471
D9	17	1095	0.477529	0.0239874
D9	18	1095	0.508213	0.0544036
D9	19	1095	0.5606	0.106522
D9	20	1095	0.662627	0.208282
D9	21	1095	0.840935	0.386322
D9	22	1095	1.13496	0.680078
D9	23	1095	1.55088	1.09573
D9	24	1095	2.08535	1.62993
D9	25	1095	2.61941	2.16373
D9	26	1095	3.05264	2.59669
D9	27	1095	3.35235	2.89613
D9	28	1095	3.55823	3.10174
D9	29	1095	3.69842	3.24167
D9	30	1095	3.78313	3.32611
D9	31	1095	3.83202	3.37473
D9	32	1095	3.86499	3.40743
D9	33	1095	3.88193	3.4241
D9	34	1095	3.89312	3.43502
D9	35	1095	3.90014	3.44177
D9	36	1095	3.89455	3.43592
D9	37	1095	3.89304	3.43414
D9	38	1095	3.8886	3.42944
D9	39	1095	3.88907	3.42963
D9	40	1095	3.89093	3.43123
D10	1	1095	0.415772	-0.0199161
D10	2	1095	0.431442	-0.00371833
D10	3	1095	0.434925	0.000291153
D10	4	1095	0.436747	0.00264089
D10	5	1095	0.434344	0.000764412
D10	6	1095	0.432921	-0.000131029
D10	7	1095	0.435819	0.00329379
D10	8	1095	0.429596	-0.00240241
D10	9	1095	0.429269	-0.00220262
D10	10	1095	0.431102	0.000157575
D10	11	1095	0.427302	-0.00311529
D10	12	1095	0.426066	-0.00382384
D10	13	1095	0.4303	0.000936755
D10	14	1095	0.427303	-0.00153338
D10	15	1095	0.426399	-0.00190949
D10	16	1095	0.429327	0.00154544
D10	17	1095	0.432743	0.00548804
D10	18	1095	0.440398	0.0136705
D10	19	1095	0.454065	0.0278644
D10	20	1095	0.478844	0.05317
D10	21	1095	0.529065	0.103918
D10	22	1095	0.613773	0.189154
D10	23	1095	0.748597	0.324505
D10	24	1095	0.963003	0.539437
D10	25	1095	1.26716	0.844124
D10	26	1095	1.66784	1.24533
D10	27	1095	2.13381	1.71183
D10	28	1095	2.60427	2.18282
D10	29	1095	2.98694	2.56601
D10	30	1095	3.27548	2.85508
D10	31	1095	3.46936	3.04949
D10	32	1095	3.60286	3.18351
D10	33	1095	3.69311	3.27429
D10	34	1095	3.75977	3.34148
D10	35	1095	3.79114	3.37337
D10	36	1095	3.82929	3.41205
D10	37	1095	3.83301	3.41629
D10	38	1095	3.83082	3.41464
D10	39	1095	3.84466	3.429
D10	40	1095	3.84727	3.43214
D11	1	1095	0.385837	-0.0074866
D11	2	1095	0.388688	-0.00422474
D11	3	1095	0.392009	-0.000492808
D11	4	1095	0.392481	0.000389637
D11	5	1095	0.392079	0.000397801
D11	6	1095	0.391551	0.000280259
D11	7	1095	0.392115	0.00125503
D11	8	1095	0.388934	-0.00151566
D11	9	1095	0.390943	0.000904345
D11	10	1095	0.38937	-0.000258663
D11	11	1095	0.388184	-0.00103421
D11	12	1095	0.387263	-0.00154434
D11	13	1095	0.390658	0.00226097
D11	14	1095	0.387232	-0.000754372
D11	15	1095	0.386916	-0.000660228
D11	16	1095	0.387125	-4.05201e-05
D11	17	1095	0.385719	-0.00103601
D11	18	1095	0.388193	0.00184876
D11	19	1095	0.387367	0.00143305
D11	20	1095	0.400498	0.0149751
D11	21	1095	0.41267	0.027557
D11	22	1095	0.435895	0.0511929
D11	23	1095	0.489058	0.104767
D11	24	1095	0.57799	0.194108
D11	25	1095	0.737926	0.354456
D11	26	1095	0.99857	0.61551
D11	27	1095	1.38535	1.0027
D11	28	1095	1.866	1.48376
D11	29	1095	2.36502	1.98319
D11	30	1095	2.76068	2.37926
D11	31	1095	3.05426	2.67326
D11	32	1095	3.25318	2.87259
D11	33	1095	3.38195	3.00177
D11	34	1095	3.47379	3.09402
D11	35	1095	3.53345	3.15409
D11	36	1095	3.57465	3.1957
D11	37	1095	3.6056	3.22705
D11	38	1095	3.61957	3.24143
D11	39	1095	3.62653	3.24881
D11	40	1095	3.6329	3.25558
D12	1	1095	0.410155	-0.0227297
D12	2	1095	0.414481	-0.0185244
D12	3	1095	0.424063	-0.0090637
D12	4	1095	0.431067	-0.00217994
D12	5	1095	0.439959	0.00659132
D12	6	1095	0.436655	0.00316596
D12	7	1095	0.436101	0.00249149
D12	8	1095	0.434991	0.00126068
D12	9	1095	0.433536	-0.000315101
D12	10	1095	0.436563	0.00259127
D12	11	1095	0.435458	0.001366
D12	12	1095	0.432504	-0.00170886
D12	13	1095	0.437148	0.00281378
D12	14	1095	0.430112	-0.00434323
D12	15	1095	0.431296	-0.00327953
D12	16	1095	0.434062	-0.000634228
D12	17	1095	0.434808	-9.25213e-06
D12	18	1095	0.436191	0.00125334
D12	19	1095	0.44445	0.00939125
D12	20	1095	0.459573	0.024394
D12	21	1095	0.481457	0.0461572
D12	22	1095	0.52716	0.0917388
D12	23	1095	0.601423	0.165881
D12	24	1095	0.726341	0.290679
D12	25	1095	0.918157	0.482374
D12	26	1095	1.19783	0.761922
D12	27	1095	1.55252	1.11649
D12	28	1095	1.98029	1.54415
D12	29	1095	2.41927	1.983
D12	30	1095	2.79488	2.35849
D12	31	1095	3.08657	2.65007
D12	32	1095	3.28173	2.8451
D12	33	1095	3.42815	2.9914
D12	34	1095	3.53917	3.1023
D12	35	1095	3.61063	3.17364
D12	36	1095	3.65998	3.22287
D12	37	1095	3.69221	3.25498
D12	38	1095	3.70421	3.26685
D12	39	1095	3.71312	3.27565
D12	40	1095	3.72225	3.28466
E1	1	1416	0.498754	-0.0326678
E1	2	1416	0.508548	-0.0233471
E1	3	1416	0.525425	-0.00694312
E1	4	1416	0.535427	0.00258654
E1	5	1416	0.532915	-0.000398089
E1	6	1416	0.535729	0.00194307
E1	7	1416	0.536324	0.00206522
E1	8	1416	0.53753	0.00279801
E1	9	1416	0.535394	0.000189843
E1	10	1416	0.537261	0.00158419
E1	11	1416	0.536128	-2.19662e-05
E1	12	1416	0.540223	0.00360082
E1	13	1416	0.536149	-0.000946468
E1	14	1416	0.534245	-0.00332337
E1	15	1416	0.534413	-0.00362788
E1	16	1416	0.539274	0.000760051
E1	17	1416	0.537003	-0.00198395
E1	18	1416	0.537916	-0.00154334
E1	19	1416	0.541387	0.0014546
E1	20	1416	0.539913	-0.000491773
E1	21	1416	0.543175	0.00229762
E1	22	1416	0.549638	0.00828814
E1	23	1416	0.559983	0.01816
E1	24	1416	0.571701	0.029405
E1	25	1416	0.602927	0.0601586
E1	26	1416	0.662329	0.119088
E1	27	1416	0.765503	0.221789
E1	28	1416	0.964325	0.420138
E1	29	1416	1.27907	0.734414
E1	30	1416	1.71145	1.16632
E1	31	1416	2.13684	1.59123
E1	32	1416	2.4409	1.89482
E1	33	1416	2.7277	2.18115
E1	34	1416	2.99003	2.443
E1	35	1416	3.18134	2.63384
E1	36	1416	3.31686	2.76889
E1	37	1416	3.41976	2.87132
E1	38	1416	3.48933	2.94041
E1	39	1416	3.53266	2.98327
E1	40	1416	3.57953	3.02967
E2	1	1416	0.557058	-0.0413487
E2	2	1416	0.575905	-0.0226976
E2	3	1416	0.596315	-0.00248363
E2	4	1416	0.602529	0.00353407
E2	5	1416	0.597352	-0.0018397
E2	6	1416	0.599407	1.89706e-05
E2	7	1416	0.59724	-0.00234398
E2	8	1416	0.598177	-0.00160332
E2	9	1416	0.601384	0.00140738
E2	10	1416	0.601668	0.00149579
E2	11	1416	0.600804	0.000435796
E2	12	1416	0.605281	0.00471566
E2	13	1416	0.601614	0.00085258
E2	14	1416	0.601357	0.000399301
E2	15	1416	0.602153	0.000999295
E2	16	1416	0.59924	-0.00210955
E2	17	1416	0.599599	-0.00194729
E2	18	1416	0.598515	-0.00322705
E2	19	1416	0.601595	-0.000343363
E2	20	1416	0.602522	0.000387762
E2	21	1416	0.603982	0.00165128
E2	22	1416	0.608094	0.0055666
E2	23	1416	0.618202	0.0154791
E2	24	1416	0.633341	0.0304216
E2	25	1416	0.665773	0.0626575
E2	26	1416	0.726185	0.122873
E2	27	1416	0.839006	0.235498
E2	28	1416	1.03797	0.43427
E2	29	1416	1.33014	0.726244
E2	30	1416	1.632	1.0279
E2	31	1416	1.90836	1.30406
E2	32	1416	2.19837	1.59388
E2	33	1416	2.46225	1.85757
[truncated: 1,847 more rows]
