# Supplementary material for: Exploring the plasmodesmata callose-binding protein gene family in upland cotton: unraveling insights for enhancing fiber length
Source: PeerJ. 2024 Jun 26;12:e17625. doi: 10.7717/peerj.17625 (PMC11214431; doi:10.7717/peerj.17625)
Supplement: Supplemental Information 6 [file peerj-12-17625-s006.xls]

## Sheet: Sheet1
												average
	WT	30.615	30.32	30.82	30.62	30.45	30.19	30.6	30.28	30.4	30.575	30.487
	GhPDCB9-1	29.63	29.26	28.22	28.97	29.31	28.76	29.13	29.54	28.75	28.94	29.051
	GhPDCB9-2	26.96	28.91	28.47	28.52	27.94	28.37	28.46	29.01	28.76	28.83	28.423
	GhPDCB9-3	27.89	27.38	27.74	27.97	27.71	27.77	27.48	27.66	27.8	27.76	27.716
	GhPDCB9-4	26.74	27.745	26.645	26.87	27.43	27.06	26.85	26.79	27.13	27.2	27.046
	GhPDCB9-5	25.705	26.98	26.78	25.89	26.03	25.45	25.91	26.12	26.38	26.71	26.1955
	GhPDCB9-6	27.615	24.515	26.32	24.95	24.87	24.99	26.53	25.66	25.91	25.81	25.717
			WT	30.575
			1	28.94
			2	28.83
			3	27.76
			4	27.2
			5	26.71
			6	25.81
